# Supplementary material for: Role of PPARG in Chemosensitivity-Regulating Network for Hypopharyngeal Squamous Cell Carcinoma
Source: Hindawi journal article supplement (doi:10.1155/2023/6019318), 2023-09-25
Supplement: f1 [file 6019318.f1.pdf]

## Ref info supporting the chemosensitivity\_promoters

| Relation Name                                       | PMID     | DOI                 |
|-----------------------------------------------------|----------|---------------------|
| positive Regulation: ESRP1 --> chemosensitivity     | 33495408 | 10.18632/aging.202  |
| positive Regulation: ESRP1 --> chemosensitivity     | 33495408 | 10.18632/aging.202  |
| positive Regulation: ESRP1 --> chemosensitivity     | 33495408 | 10.18632/aging.202  |
| positive Regulation: FOXA3 --> chemosensitivity     | 33292133 | 10.2174/1568009620  |
| positive Regulation: ULK2 --> chemosensitivity      | 32848049 | 10.1194/jlr.RA1200  |
| positive Regulation: ULK2 --> chemosensitivity      | 30655741 | 10.3892/ol.2018.96  |
| positive Regulation: ULK2 --> chemosensitivity      | 30655741 | 10.3892/ol.2018.96  |
| positive Regulation: ULK2 --> chemosensitivity      | 34350832 | 10.4149/gpb_202100  |
| positive Regulation: HTR7 --> chemosensitivity      | 30866045 | 10.1113/JP27705210  |
| positive Regulation: MME --> chemosensitivity       | 15788637 |                     |
| positive Regulation: MME --> chemosensitivity       | 22895534 | 10.3892/i.jo.2012.1 |
| positive Regulation: MME --> chemosensitivity       | 14734478 | 10.1158/1078-0432.  |
| positive Regulation: SEMA3F --> chemosensitivity    | 30824197 | 10.1016/j.molmed.2  |
| positive Regulation: SEMA3F --> chemosensitivity    | 36119535 | 10.3389/fonc.2022.  |
| positive Regulation: SEMA3F --> chemosensitivity    | 36119535 | 10.3389/fonc.2022.  |
| positive Regulation: ALB --> chemosensitivity       | 23063551 | 10.1016/j.jconrel.  |
| positive Regulation: ALB --> chemosensitivity       | 23063551 | 10.1016/j.jconrel.  |
| positive Regulation: TNFRSF12A --> chemosensitivity | 34517088 | 10.1016/j.cellsig.  |
| positive Regulation: CYP3A4 --> chemosensitivity    | 19011599 | 10.1038/cgt.2008.9  |
| positive Regulation: RHOA --> chemosensitivity      | 15448013 | 10.1158/1078-0432.  |
| positive Regulation: MIR129-1 --> chemosensitivity  | 25218158 | 10.1016/j.bbrc.201  |
| positive Regulation: MIR129-1 --> chemosensitivity  | 25218158 | 10.1016/j.bbrc.201  |
| positive Regulation: MIR129-1 --> chemosensitivity  | 33333206 | 10.1016/j.addr.202  |
| positive Regulation: MIR129-1 --> chemosensitivity  | 28012924 | 10.1016/j.biopha.2  |
| positive Regulation: MIR129-1 --> chemosensitivity  | 28012924 | 10.1016/j.biopha.2  |
| positive Regulation: MIR129-1 --> chemosensitivity  | 29864913 | 10.1016/j.biopha.2  |
| positive Regulation: MIR129-1 --> chemosensitivity  | 29864913 | 10.1016/j.biopha.2  |
| positive Regulation: MIR129-1 --> chemosensitivity  | 29864913 | 10.1016/j.biopha.2  |
| positive Regulation: MIR129-1 --> chemosensitivity  | 29864913 | 10.1016/j.biopha.2  |
| positive Regulation: MIR129-1 --> chemosensitivity  | 30021343 | 10.1016/j.biopha.2  |
| positive Regulation: MIR129-1 --> chemosensitivity  | 30551491 | 10.1016/j.biopha.2  |
| positive Regulation: MIR129-1 --> chemosensitivity  | 28095367 | 10.1515/hsz-2016-0  |
| positive Regulation: MIR129-1 --> chemosensitivity  | 29531296 | 10.1038/s41419-018  |
| positive Regulation: MIR129-1 --> chemosensitivity  | 32893526 | 10.1631/jzus.B2000  |
| positive Regulation: MIR129-1 --> chemosensitivity  | 26518892 | 10.14715/cmb/2015.  |
| positive Regulation: MIR129-1 --> chemosensitivity  | 23744359 | 10.1038/cddis.2013  |
| positive Regulation: MIR129-1 --> chemosensitivity  | 25571061 | 10.1109/EMBC.2014.  |
| positive Regulation: MIR129-1 --> chemosensitivity  | 29864913 | 10.1016/j.biopha.2  |
| positive Regulation: MIR129-1 --> chemosensitivity  | 29864913 | 10.1016/j.biopha.2  |
| positive Regulation: MIR129-1 --> chemosensitivity  | 29864913 | 10.1016/j.biopha.2  |
| positive Regulation: MIR129-1 --> chemosensitivity  |          | 10.3390/molecules2  |
| positive Regulation: MIR129-1 --> chemosensitivity  |          | 10.3390/molecules2  |
| positive Regulation: MIR129-1 --> chemosensitivity  | 35578599 | 10.1155/2022/79817  |
| positive Regulation: MIR129-1 --> chemosensitivity  | 35637945 | 10.7150/ijbs.73504  |
| positive Regulation: MIR129-1 --> chemosensitivity  | 35031927 | 10.1007/s11033-021  |
| positive Regulation: MIR129-1 --> chemosensitivity  | 36119459 | 10.4084/MJHID.2022  |
| positive Regulation: MIR129-1 --> chemosensitivity  | 34132932 | 10.1007/s10565-021  |
| positive Regulation: MIR129-1 --> chemosensitivity  | 34132932 | 10.1007/s10565-021  |
| positive Regulation: LINC00672 --> chemosensitivity | 28232485 | 10.1074/jbc.M116.7  |
| positive Regulation: LINC00672 --> chemosensitivity | 28232485 | 10.1074/jbc.M116.7  |
| positive Regulation: LINC00672 --> chemosensitivity | 29775889 | 10.1016/j.biopha.2  |

|                                                     |          |                     |
|-----------------------------------------------------|----------|---------------------|
| positive Regulation: LINC00672 --> chemosensitivity | 28232485 | 10.1074/jbc.M116.7  |
| positive Regulation: LINC00672 --> chemosensitivity | 28232485 | 10.1074/jbc.M116.7  |
| positive Regulation: LINC00672 --> chemosensitivity | 28232485 | 10.1074/jbc.M116.7  |
| positive Regulation: LINC00672 --> chemosensitivity | 28232485 | 10.1074/jbc.M116.7  |
| positive Regulation: LINC00672 --> chemosensitivity | 30127216 | 10.4103/0366-6999.  |
| positive Regulation: LINC00672 --> chemosensitivity | 32633343 | 10.26355/eurrev_20  |
| positive Regulation: LINC00672 --> chemosensitivity | 28232485 | 10.1074/jbc.M116.7  |
| positive Regulation: SMAD2 --> chemosensitivity     | 34453645 | 10.1007/s11010-021  |
| positive Regulation: KLF4 --> chemosensitivity      |          | 10.1016/j.expchem.2 |
| positive Regulation: KLF4 --> chemosensitivity      | 30176890 | 10.1186/s12964-018  |
| positive Regulation: KLF4 --> chemosensitivity      | 30176890 | 10.1186/s12964-018  |
| positive Regulation: KLF4 --> chemosensitivity      | 30176890 | 10.1186/s12964-018  |
| positive Regulation: KLF4 --> chemosensitivity      | 30176890 | 10.1186/s12964-018  |
| positive Regulation: KLF4 --> chemosensitivity      | 24551169 | 10.1371/journal.pc  |
| positive Regulation: KLF4 --> chemosensitivity      | 30176890 | 10.1186/s12964-018  |
| positive Regulation: KLF4 --> chemosensitivity      | 30176890 | 10.1186/s12964-018  |
| positive Regulation: MIR524 --> chemosensitivity    | 29221202 | 10.18632/oncotarge  |
| positive Regulation: MIR524 --> chemosensitivity    | 35922753 | 10.1186/s11658-022  |
| positive Regulation: MAGI3 --> chemosensitivity     | 35864508 | 10.1186/s12943-022  |
| positive Regulation: MAGI3 --> chemosensitivity     | 35864508 | 10.1186/s12943-022  |
| positive Regulation: MAGI3 --> chemosensitivity     | 35864508 | 10.1186/s12943-022  |
| positive Regulation: MAGI3 --> chemosensitivity     | 35864508 | 10.1186/s12943-022  |
| positive Regulation: MAGI3 --> chemosensitivity     | 35864508 | 10.1186/s12943-022  |
| positive Regulation: TNFAIP8L2 --> chemosensitivity | 30114619 | 10.1016/j.molimm.2  |
| positive Regulation: HNF4A --> chemosensitivity     | 33462379 | 10.1038/s12276-020  |
| positive Regulation: HNF4A --> chemosensitivity     | 33462379 | 10.1038/s12276-020  |
| positive Regulation: HNF4A --> chemosensitivity     | 25175346 | 10.1002/jps.241281  |
| positive Regulation: HNF4A --> chemosensitivity     | 25175346 | 10.1002/jps.241281  |
| positive Regulation: TP73 --> chemosensitivity      | 22446689 | 10.1016/j.jhep.201  |
| positive Regulation: TP73 --> chemosensitivity      | 20156675 | 10.1016/j.ejca.201  |
| positive Regulation: TP73 --> chemosensitivity      | 15219617 | 10.1016/j.semcance  |
| positive Regulation: TP73 --> chemosensitivity      | 18054518 | 10.1016/j.drup.200  |
| positive Regulation: TP73 --> chemosensitivity      | 21195657 | 10.1016/j.drup.201  |
| positive Regulation: TP73 --> chemosensitivity      | 18620901 | 10.1016/j.oralonco  |
| positive Regulation: TP73 --> chemosensitivity      | 16530485 | 10.1016/j.molmed.2  |
| positive Regulation: TP73 --> chemosensitivity      | 22340593 | 10.1016/j.ccr.2011  |
| positive Regulation: TP73 --> chemosensitivity      | 21293058 |                     |
| positive Regulation: TP73 --> chemosensitivity      | 21293058 |                     |
| positive Regulation: TP73 --> chemosensitivity      | 21293058 |                     |
| positive Regulation: TP73 --> chemosensitivity      | 21293058 |                     |
| positive Regulation: TP73 --> chemosensitivity      | 21293058 |                     |
| positive Regulation: TP73 --> chemosensitivity      | 17446929 |                     |
| positive Regulation: TP73 --> chemosensitivity      | 17626635 |                     |
| positive Regulation: TP73 --> chemosensitivity      | 18806757 |                     |
| positive Regulation: TP73 --> chemosensitivity      | 16195739 |                     |
| positive Regulation: TP73 --> chemosensitivity      | 15153941 |                     |
| positive Regulation: TP73 --> chemosensitivity      | 15153941 |                     |
| positive Regulation: TP73 --> chemosensitivity      | 26459801 | 10.3892/ijo.2015.3  |
| positive Regulation: TP73 --> chemosensitivity      | 27376739 | 10.1007/978-981-10  |
| positive Regulation: TP73 --> chemosensitivity      | 27376730 | 10.1007/978-981-10  |
| positive Regulation: TP73 --> chemosensitivity      | 16773194 |                     |
| positive Regulation: TP73 --> chemosensitivity      | 21293058 | 10.1172/JCI43897    |
| positive Regulation: TP73 --> chemosensitivity      | 21293058 | 10.1172/JCI43897    |
| positive Regulation: TP73 --> chemosensitivity      | 21293058 | 10.1172/JCI43897    |

|                                   |                  |          |                       |
|-----------------------------------|------------------|----------|-----------------------|
| positive Regulation: TP73 -->     | chemosensitivity | 21391908 |                       |
| positive Regulation: TP73 -->     | chemosensitivity | 21391909 |                       |
| positive Regulation: TP73 -->     | chemosensitivity | 21391909 |                       |
| positive Regulation: TP73 -->     | chemosensitivity | 21391904 |                       |
| positive Regulation: TP73 -->     | chemosensitivity | 22762204 | 10. 1042/BSR2011012   |
| positive Regulation: TP73 -->     | chemosensitivity | 21861192 | 10. 1007/s10495-011   |
| positive Regulation: TP73 -->     | chemosensitivity | 24052075 | 10. 1038/cddis. 2013  |
| positive Regulation: TP73 -->     | chemosensitivity | 23494264 | 10. 1007/s12013-013   |
| positive Regulation: TP73 -->     | chemosensitivity | 22900074 | 10. 1371/journal. pc  |
| positive Regulation: TP73 -->     | chemosensitivity | 24052409 | 10. 1007/s10495-013   |
| positive Regulation: TP73 -->     | chemosensitivity |          | 10. 1007/978-94-007   |
| positive Regulation: TP73 -->     | chemosensitivity | 24946002 | 10. 1038/bjc. 2014. 2 |
| positive Regulation: TP73 -->     | chemosensitivity | 24722210 | 10. 1038/cdd. 2014. 4 |
| positive Regulation: TP73 -->     | chemosensitivity | 15678153 | 10. 1038/sj. cgt. 770 |
| positive Regulation: TP73 -->     | chemosensitivity | 16195739 | 10. 1038/sj. cdd. 440 |
| positive Regulation: TP73 -->     | chemosensitivity | 17446929 | 10. 1172/JCI30866     |
| positive Regulation: TP73 -->     | chemosensitivity | 18565851 | 10. 1182/blood-2007   |
| positive Regulation: TP73 -->     | chemosensitivity | 19861456 | 10. 1158/1078-0432.   |
| positive Regulation: TP73 -->     | chemosensitivity | 20100536 | 10. 1016/j. tox. 2010 |
| positive Regulation: TP73 -->     | chemosensitivity | 21293058 | 10. 1172/JCI4389710   |
| positive Regulation: TP73 -->     | chemosensitivity | 21436470 | 10. 18632/oncotarge   |
| positive Regulation: TP73 -->     | chemosensitivity | 36352215 | 10. 1007/978-3-031-   |
| positive Regulation: CAST -->     | chemosensitivity | 24589339 | 10. 1016/j. ajpath. 2 |
| positive Regulation: CCNL2 -->    | chemosensitivity | 22799343 | 10. 7314/apjcp. 2012  |
| positive Regulation: CCNL2 -->    | chemosensitivity | 22799343 | 10. 7314/apjcp. 2012  |
| positive Regulation: CCNL2 -->    | chemosensitivity | 22799343 | 10. 7314/apjcp. 2012  |
| positive Regulation: TFF1 -->     | chemosensitivity | 29809170 | 10. 1172/JCI97755     |
| positive Regulation: TFF1 -->     | chemosensitivity | 29210057 | 10. 1002/ijc. 311971  |
| positive Regulation: TFF1 -->     | chemosensitivity |          | 10. 1172/JCI97755     |
| positive Regulation: MIR600HG --> | chemosensitivity | 32270866 | 10. 1042/BSR2020039   |
| positive Regulation: MIR600HG --> | chemosensitivity | 32270866 | 10. 1042/BSR2020039   |
| positive Regulation: MIR600HG --> | chemosensitivity | 32270866 | 10. 1042/BSR2020039   |
| positive Regulation: MIR600HG --> | chemosensitivity | 32270866 | 10. 1042/BSR2020039   |
| positive Regulation: TREX2 -->    | chemosensitivity | 34031538 | 10. 1038/s41374-021   |
| positive Regulation: ABCB5 -->    | chemosensitivity |          | 10. 1053/j. gastro. 2 |
| positive Regulation: ABCB5 -->    | chemosensitivity | 34381520 | 10. 1155/2021/39053   |
| positive Regulation: DPEP1 -->    | chemosensitivity | 22363658 | 10. 1371/journal. pc  |
| positive Regulation: SFRP1 -->    | chemosensitivity | 24643460 | 10. 2119/molmed. 201  |
| positive Regulation: SFRP1 -->    | chemosensitivity | 24643460 | 10. 2119/molmed. 201  |
| positive Regulation: SFRP1 -->    | chemosensitivity | 24643460 | 10. 2119/molmed. 201  |
| positive Regulation: MIR874 -->   | chemosensitivity | 28922711 | 10. 1016/j. biopha. 2 |
| positive Regulation: MIR874 -->   | chemosensitivity | 29039607 | 10. 3892/or. 2017. 60 |
| positive Regulation: MIR874 -->   | chemosensitivity | 30106442 | 10. 3892/or. 2018. 66 |
| positive Regulation: MIR874 -->   | chemosensitivity | 30320370 | 10. 3892/ijo. 2018. 4 |
| positive Regulation: MIR874 -->   | chemosensitivity | 32016967 | 10. 26355/eurrev_20   |
| positive Regulation: MIR874 -->   | chemosensitivity | 32141542 | 10. 26355/eurrev_20   |
| positive Regulation: MIR874 -->   | chemosensitivity | 27221209 | 10. 3892/or. 2016. 48 |
| positive Regulation: MIR874 -->   | chemosensitivity | 30004169 | 10. 1002/jbt. 221681  |
| positive Regulation: MIR874 -->   | chemosensitivity | 34716858 | 10. 1007/s11010-021   |
| positive Regulation: MIR874 -->   | chemosensitivity | 34716858 | 10. 1007/s11010-021   |
| positive Regulation: ING4 -->     | chemosensitivity | 15882981 | 10. 1016/j. bbrc. 200 |
| positive Regulation: ING4 -->     | chemosensitivity | 27484725 | 10. 3892/mmr. 2016. 5 |
| positive Regulation: ING4 -->     | chemosensitivity | 20707719 | 10. 1089/cbr. 2010. 0 |
| positive Regulation: ING4 -->     | chemosensitivity | 22863759 | 10. 1038/cgt. 2012. 5 |

|                                                    |          |                    |
|----------------------------------------------------|----------|--------------------|
| positive Regulation: ING4 --> chemosensitivity     | 21052098 | 10.1038/cgt.2010.6 |
| positive Regulation: ING4 --> chemosensitivity     | 23969950 | 10.3892/or.2013.26 |
| positive Regulation: ING4 --> chemosensitivity     | 23969950 | 10.3892/or.2013.26 |
| positive Regulation: ING4 --> chemosensitivity     | 23991130 | 10.1371/journal.po |
| positive Regulation: ING4 --> chemosensitivity     | 21553494 |                    |
| positive Regulation: m_Hct --> chemosensitivity    | 26747178 | 10.1007/s13277-015 |
| positive Regulation: MIR584 --> chemosensitivity   | 32346311 | 10.2147/CMAR.S2465 |
| positive Regulation: MIR146A --> chemosensitivity  | 23707524 | 10.1016/j.cellsig. |
| positive Regulation: MIR146A --> chemosensitivity  | 28560455 | 10.3892/ijo.2017.4 |
| positive Regulation: MIR146A --> chemosensitivity  | 28975995 |                    |
| positive Regulation: MIR146A --> chemosensitivity  | 29966370 | 10.3390/ijms190719 |
| positive Regulation: MIR146A --> chemosensitivity  | 32626953 | 10.3892/ijmm.2020. |
| positive Regulation: MIR146A --> chemosensitivity  | 32626953 | 10.3892/ijmm.2020. |
| positive Regulation: MIR146A --> chemosensitivity  | 33390839 | 10.7150/ijbs.50773 |
| positive Regulation: MIR146A --> chemosensitivity  | 34281588 | 10.1186/s12967-021 |
| positive Regulation: MIR146A --> chemosensitivity  | 24565101 | 10.1186/1476-4598- |
| positive Regulation: MIR146A --> chemosensitivity  | 27131313 | 10.3727/096504016X |
| positive Regulation: MIR146A --> chemosensitivity  | 27131313 | 10.3727/096504016X |
| positive Regulation: MIR146A --> chemosensitivity  | 27131313 | 10.3727/096504016X |
| positive Regulation: MIR146A --> chemosensitivity  | 21610143 | 10.1158/1078-0432. |
| positive Regulation: MIR146A --> chemosensitivity  | 28678319 |                    |
| positive Regulation: MIR146A --> chemosensitivity  |          | 10.7150/ijbs.50773 |
| positive Regulation: MIR146A --> chemosensitivity  | 35193602 | 10.1186/s12967-021 |
| positive Regulation: MIR146A --> chemosensitivity  | 36293478 | 10.3390/ijms232012 |
| positive Regulation: APAF1 --> chemosensitivity    | 14729468 | 10.1016/j.yexcr.20 |
| positive Regulation: APAF1 --> chemosensitivity    | 14729468 | 10.1016/j.yexcr.20 |
| positive Regulation: APAF1 --> chemosensitivity    | 15305193 |                    |
| positive Regulation: APAF1 --> chemosensitivity    | 33904968 | 10.1007/s12032-021 |
| positive Regulation: MIR577 --> chemosensitivity   | 31731194 | 10.1016/j.biopha.2 |
| positive Regulation: MIR577 --> chemosensitivity   | 33338745 | 10.1016/j.biopha.2 |
| positive Regulation: MIR577 --> chemosensitivity   | 30879950 | 10.1016/j.ymthe.20 |
| positive Regulation: MIR577 --> chemosensitivity   | 31115000 | 10.26355/eurrev_20 |
| positive Regulation: MIR577 --> chemosensitivity   | 30879950 | 10.1016/j.ymthe.20 |
| positive Regulation: MIR577 --> chemosensitivity   | 30879950 | 10.1016/j.ymthe.20 |
| positive Regulation: MIR577 --> chemosensitivity   | 33767583 | 10.7150/ijbs.45885 |
| positive Regulation: MIR577 --> chemosensitivity   | 34194499 | 10.1155/2021/99194 |
| positive Regulation: MIR577 --> chemosensitivity   | 28150434 | 10.1002/jbt.218881 |
| positive Regulation: MIR206 --> chemosensitivity   | 32800545 | 10.1016/j.bbrc.202 |
| positive Regulation: MIR206 --> chemosensitivity   | 32800545 | 10.1016/j.bbrc.202 |
| positive Regulation: MIR206 --> chemosensitivity   |          | 10.7150/ijbs.73949 |
| positive Regulation: MIR144 --> chemosensitivity   | 34020028 | 10.1016/j.semcance |
| positive Regulation: MIR144 --> chemosensitivity   | 27508019 |                    |
| positive Regulation: MIR144 --> chemosensitivity   | 27508019 |                    |
| positive Regulation: MIR144 --> chemosensitivity   | 27508019 |                    |
| positive Regulation: MIR144 --> chemosensitivity   | 27508019 |                    |
| positive Regulation: MIR144 --> chemosensitivity   | 29504819 | 10.1080/15384047.2 |
| positive Regulation: MIR144 --> chemosensitivity   | 31659146 | 10.12659/MSM.91607 |
| positive Regulation: MIR144 --> chemosensitivity   | 31659146 | 10.12659/MSM.91607 |
| positive Regulation: MIRLET7I --> chemosensitivity | 19776209 |                    |
| positive Regulation: MIRLET7I --> chemosensitivity |          |                    |
| positive Regulation: GAS5 --> chemosensitivity     | 33631478 | 10.1016/j.prp.2021 |
| positive Regulation: GAS5 --> chemosensitivity     | 28686971 | 10.1016/j.biopha.2 |
| positive Regulation: GAS5 --> chemosensitivity     | 28686971 | 10.1016/j.biopha.2 |



|                                                      |          |                    |
|------------------------------------------------------|----------|--------------------|
| positive Regulation: FNDC5 --> chemosensitivity      | 31412018 | 10.12659/MSM.91762 |
| positive Regulation: FNDC5 --> chemosensitivity      | 31412018 | 10.12659/MSM.91762 |
| positive Regulation: FNDC5 --> chemosensitivity      | 31412018 | 10.12659/MSM.91762 |
| positive Regulation: FNDC5 --> chemosensitivity      | 31412018 | 10.12659/MSM.91762 |
| positive Regulation: FNDC5 --> chemosensitivity      | 31412018 | 10.12659/MSM.91762 |
| positive Regulation: MIR126 --> chemosensitivity     | 27622325 | 10.1016/j.bbrc.201 |
| positive Regulation: MIR126 --> chemosensitivity     | 27622325 | 10.1016/j.bbrc.201 |
| positive Regulation: MIR126 --> chemosensitivity     | 27622325 | 10.1016/j.bbrc.201 |
| positive Regulation: MIR126 --> chemosensitivity     | 33360300 | 10.1016/j.tranon.2 |
| positive Regulation: MIR126 --> chemosensitivity     |          | 10.1016/j.genrep.2 |
| positive Regulation: MIR126 --> chemosensitivity     |          | 10.12892/ejgo3658. |
| positive Regulation: MIR126 --> chemosensitivity     | 30268144 | 10.1186/s12967-018 |
| positive Regulation: MIR126 --> chemosensitivity     | 25571061 | 10.1109/EMBC.2014. |
| positive Regulation: MIR126 --> chemosensitivity     | 27622325 | 10.1016/j.bbrc.201 |
| positive Regulation: MIR126 --> chemosensitivity     |          | 10.1016/j.gendis.2 |
| positive Regulation: MIR126 --> chemosensitivity     | 36329030 | 10.1080/15384047.2 |
| positive Regulation: TUSC7 --> chemosensitivity      | 31837299 | 10.1016/j.cca.2019 |
| positive Regulation: TUSC7 --> chemosensitivity      | 31837299 | 10.1016/j.cca.2019 |
| positive Regulation: HTR5A --> chemosensitivity      | 12208084 | 10.1016/s1569-9048 |
| positive Regulation: GRN --> chemosensitivity        |          | 10.1053/j.gastro.2 |
| positive Regulation: GRN --> chemosensitivity        | 33087088 | 10.1186/s12885-020 |
| positive Regulation: MUC13 --> chemosensitivity      | 26673820 | 10.18632/oncotarge |
| positive Regulation: SDF-1alpha --> chemosensitivity | 23544165 | 10.1593/tlo.12268  |
| positive Regulation: SDF-1alpha --> chemosensitivity | 24255072 | 10.1158/1078-0432. |
| positive Regulation: LRRFIP1 --> chemosensitivity    | 33707114 | 10.1016/j.pan.2021 |
| positive Regulation: BCL11B --> chemosensitivity     | 33093445 | 10.1038/s41419-020 |
| positive Regulation: IRAG1-AS1 --> chemosensitivity  | 31273338 | 10.1038/s41388-019 |
| positive Regulation: IRAG1-AS1 --> chemosensitivity  | 31273338 | 10.1038/s41388-019 |
| positive Regulation: IRAG1-AS1 --> chemosensitivity  | 31273338 | 10.1038/s41388-019 |
| positive Regulation: IRAG1-AS1 --> chemosensitivity  | 31273338 | 10.1038/s41388-019 |
| positive Regulation: IRAG1-AS1 --> chemosensitivity  | 31273338 | 10.1038/s41388-019 |
| positive Regulation: IRAG1-AS1 --> chemosensitivity  | 35541920 | 10.7150/ijbs.70292 |
| positive Regulation: FUT4 --> chemosensitivity       | 24232099 | 10.1038/cddis.2013 |
| positive Regulation: FUT4 --> chemosensitivity       | 24232099 | 10.1038/cddis.2013 |
| positive Regulation: WT1 --> chemosensitivity        | 20820871 | 10.1007/s11060-010 |
| positive Regulation: WT1 --> chemosensitivity        | 35024404 | 10.1016/j.gore.202 |
| positive Regulation: COL6A3 --> chemosensitivity     |          | 10.1016/j.tem.2021 |
| positive Regulation: PYCARD --> chemosensitivity     | 21955833 | 10.1016/j.drup.201 |
| positive Regulation: PYCARD --> chemosensitivity     | 16331272 | 10.1038/sj.onc.120 |
| positive Regulation: PYCARD --> chemosensitivity     | 16331272 | 10.1038/sj.onc.120 |
| positive Regulation: PYCARD --> chemosensitivity     | 16331272 | 10.1038/sj.onc.120 |
| positive Regulation: PYCARD --> chemosensitivity     | 16331272 | 10.1038/sj.onc.120 |
| positive Regulation: PYCARD --> chemosensitivity     | 16331272 | 10.1038/sj.onc.120 |
| positive Regulation: MIR513A1 --> chemosensitivity   | 33592319 | 10.1016/j.vph.2021 |
| positive Regulation: MIR513A1 --> chemosensitivity   | 33469378 | 10.2147/CMAR.S2773 |
| positive Regulation: MIR513A1 --> chemosensitivity   | 36255069 | 10.1097/CAD.000000 |
| positive Regulation: DDB2 --> chemosensitivity       | 36190612 | 10.1007/s11033-022 |
| positive Regulation: TBXT --> chemosensitivity       | 24504414 | 10.3892/ijo.2014.2 |
| positive Regulation: IFNB1 --> chemosensitivity      | 32044356 | 10.1016/j.canlet.2 |
| positive Regulation: IFNB1 --> chemosensitivity      | 22542810 | 10.1016/j.canlet.2 |
| positive Regulation: IFNB1 --> chemosensitivity      |          | 10.1016/j.jns.2015 |
| positive Regulation: IFNB1 --> chemosensitivity      | 29557060 | 10.1007/s11060-018 |
| positive Regulation: IFNB1 --> chemosensitivity      | 29557060 | 10.1007/s11060-018 |
| positive Regulation: IFNB1 --> chemosensitivity      | 32367437 | 10.1007/s11060-020 |
| positive Regulation: IFNB1 --> chemosensitivity      | 32367437 | 10.1007/s11060-020 |

|                                                  |          |                    |
|--------------------------------------------------|----------|--------------------|
| positive Regulation: IFNB1 --> chemosensitivity  | 26329778 | 10.3892/or.2015.42 |
| positive Regulation: IFNB1 --> chemosensitivity  | 21327711 | 10.1007/s11060-011 |
| positive Regulation: IFNB1 --> chemosensitivity  | 22277391 | 10.5692/clinicalne |
| positive Regulation: MIR122 --> chemosensitivity | 30539797 | 10.1016/j.yexmp.20 |
| positive Regulation: MIR122 --> chemosensitivity | 30539797 | 10.1016/j.yexmp.20 |
| positive Regulation: MIR122 --> chemosensitivity | 31171380 | 10.1016/j.prp.2019 |
| positive Regulation: MIR122 --> chemosensitivity | 28807240 | 10.1016/j.suronc.2 |
| positive Regulation: MIR122 --> chemosensitivity | 32898724 | 10.1016/j.coph.202 |
| positive Regulation: MIR122 --> chemosensitivity | 32505000 | 10.1016/j.omtn.202 |
| positive Regulation: MIR122 --> chemosensitivity |          | 10.1016/j.livres.2 |
| positive Regulation: MIR122 --> chemosensitivity | 27508026 |                    |
| positive Regulation: MIR122 --> chemosensitivity | 27508026 |                    |
| positive Regulation: MIR122 --> chemosensitivity | 27508026 |                    |
| positive Regulation: MIR122 --> chemosensitivity | 27508026 |                    |
| positive Regulation: MIR122 --> chemosensitivity | 28500493 | 10.1007/s11427-016 |
| positive Regulation: MIR122 --> chemosensitivity | 30593276 | 10.1186/s12943-018 |
| positive Regulation: MIR122 --> chemosensitivity | 30940145 | 10.1186/s12943-019 |
| positive Regulation: MIR122 --> chemosensitivity | 31291956 | 10.1186/s12964-019 |
| positive Regulation: MIR122 --> chemosensitivity | 31894326 | 10.3892/ijo.2019.4 |
| positive Regulation: MIR122 --> chemosensitivity | 31795332 | 10.3390/ijms202360 |
| positive Regulation: MIR122 --> chemosensitivity | 32310043 | 10.2174/1381612826 |
| positive Regulation: MIR122 --> chemosensitivity | 33155220 | 10.26355/eurrev_20 |
| positive Regulation: MIR122 --> chemosensitivity | 33743101 | 10.1007/s12032-021 |
| positive Regulation: MIR122 --> chemosensitivity | 34076140 | 10.1590/1414-431X2 |
| positive Regulation: MIR122 --> chemosensitivity | 24466275 | 10.1371/journal.pc |
| positive Regulation: MIR122 --> chemosensitivity | 26514126 | 10.1186/s13045-015 |
| positive Regulation: MIR122 --> chemosensitivity | 26514126 | 10.1186/s13045-015 |
| positive Regulation: MIR122 --> chemosensitivity |          | 10.1016/j.prp.2019 |
| positive Regulation: MIR122 --> chemosensitivity |          | 10.1186/s12943-018 |
| positive Regulation: MIR122 --> chemosensitivity |          | 10.1186/s12943-019 |
| positive Regulation: MIR122 --> chemosensitivity |          | 10.1186/s12964-019 |
| positive Regulation: MIR122 --> chemosensitivity |          | 10.3892/ijo.2019.4 |
| positive Regulation: MIR122 --> chemosensitivity |          | 10.3390/ijms202360 |
| positive Regulation: MIR122 --> chemosensitivity | 34745324 | 10.1155/2021/32675 |
| positive Regulation: MIR621 --> chemosensitivity | 30266665 | 10.1016/j.ejphar.2 |
| positive Regulation: MIR621 --> chemosensitivity | 31546023 | 10.1016/j.canlet.2 |
| positive Regulation: MIR621 --> chemosensitivity | 29278851 | 10.1016/j.biopha.2 |
| positive Regulation: MIR621 --> chemosensitivity | 29518611 | 10.1016/j.biopha.2 |
| positive Regulation: MIR621 --> chemosensitivity | 30503969 | 10.1016/j.ymthe.20 |
| positive Regulation: MIR621 --> chemosensitivity | 26427329 | 10.1016/j.semcance |
| positive Regulation: MIR621 --> chemosensitivity | 30807260 | 10.1089/gtmb.2018. |
| positive Regulation: MIR621 --> chemosensitivity | 25867061 | 10.1038/onc.2015.9 |
| positive Regulation: MIR621 --> chemosensitivity | 25867061 | 10.1038/onc.2015.9 |
| positive Regulation: MIR424 --> chemosensitivity | 32846190 | 10.1016/j.canlet.2 |
| positive Regulation: MIR424 --> chemosensitivity | 32277626 |                    |
| positive Regulation: MIR424 --> chemosensitivity | 33555529 | 10.1007/s11033-021 |
| positive Regulation: MIR424 --> chemosensitivity | 27147225 | 10.1038/ncomms1140 |
| positive Regulation: MIR424 --> chemosensitivity | 27500472 | 10.1002/mc.2253610 |
| positive Regulation: MIR424 --> chemosensitivity | 33555529 | 10.1007/s11033-021 |
| positive Regulation: MIR424 --> chemosensitivity | 33555529 | 10.1007/s11033-021 |
| positive Regulation: MIR424 --> chemosensitivity | 34440380 | 10.3390/genes12081 |
| positive Regulation: MIR424 --> chemosensitivity | 35409396 | 10.3390/ijms230740 |
| positive Regulation: MIR424 --> chemosensitivity | 35409396 | 10.3390/ijms230740 |
| positive Regulation: MIR424 --> chemosensitivity | 33038905 | 10.4149/neo_2020_2 |







|                                                  |          |                     |
|--------------------------------------------------|----------|---------------------|
| positive Regulation: FPGS --> chemosensitivity   | 18035049 | 10.1016/j.bbrc.200  |
| positive Regulation: FPGS --> chemosensitivity   | 24045662 | 10.1038/bjc.2013.5  |
| positive Regulation: FPGS --> chemosensitivity   | 15542523 | 10.1136/gut.2004.0  |
| positive Regulation: FPGS --> chemosensitivity   | 18025275 | 10.1158/1535-7163.  |
| positive Regulation: FPGS --> chemosensitivity   | 32256983 | 10.4162/nrp.2020.1  |
| positive Regulation: CASR --> chemosensitivity   | 19038444 | 10.1016/j.ceca.200  |
| positive Regulation: RASSF1 --> chemosensitivity | 31273338 | 10.1038/s41388-019  |
| positive Regulation: RASSF1 --> chemosensitivity | 19567146 |                     |
| positive Regulation: RASSF1 --> chemosensitivity | 19567146 |                     |
| positive Regulation: RASSF1 --> chemosensitivity | 33442234 | 10.2147/DDDT.S2692  |
| positive Regulation: RASSF1 --> chemosensitivity | 33442234 | 10.2147/DDDT.S2692  |
| positive Regulation: UNC5B --> chemosensitivity  | 32141538 | 10.26355/eurrev_20  |
| positive Regulation: ERCC2 --> chemosensitivity  | 30109500 | 10.1007/s00432-018  |
| positive Regulation: ERCC2 --> chemosensitivity  | 32377720 | 10.3892/ijmm.2020.  |
| positive Regulation: ERCC2 --> chemosensitivity  | 32377720 | 10.3892/ijmm.2020.  |
| positive Regulation: ERCC2 --> chemosensitivity  | 32377720 | 10.3892/ijmm.2020.  |
| positive Regulation: ERCC2 --> chemosensitivity  | 32377720 | 10.3892/ijmm.2020.  |
| positive Regulation: ERCC2 --> chemosensitivity  | 32377720 | 10.3892/ijmm.2020.  |
| positive Regulation: ERCC2 --> chemosensitivity  | 32377720 | 10.3892/ijmm.2020.  |
| positive Regulation: ERCC2 --> chemosensitivity  | 32377720 | 10.3892/ijmm.2020.  |
| positive Regulation: ERCC2 --> chemosensitivity  | 25571061 | 10.1109/EMBC.2014.  |
| positive Regulation: ERCC2 --> chemosensitivity  | 32377720 | 10.3892/ijmm.2020.  |
| positive Regulation: ERCC2 --> chemosensitivity  | 32377720 | 10.3892/ijmm.2020.  |
| positive Regulation: CSRP2 --> chemosensitivity  | 33324073 | 10.2147/OTT.S28180  |
| positive Regulation: TP53 --> chemosensitivity   | 28755993 | 10.1016/j.ijpharm.  |
| positive Regulation: TP53 --> chemosensitivity   | 29615301 | 10.1016/j.dld.2018  |
| positive Regulation: TP53 --> chemosensitivity   | 21211512 | 10.1016/j.abb.2010  |
| positive Regulation: TP53 --> chemosensitivity   | 15865929 | 10.1016/j.bbrc.200  |
| positive Regulation: TP53 --> chemosensitivity   | 20233581 | 10.1016/j.bbrc.201  |
| positive Regulation: TP53 --> chemosensitivity   |          | 10.1016/S0006-2952  |
| positive Regulation: TP53 --> chemosensitivity   | 12694871 | 10.1016/S0006-2952  |
| positive Regulation: TP53 --> chemosensitivity   | 12948852 | 10.1016/S0006-2952  |
| positive Regulation: TP53 --> chemosensitivity   | 17445779 | 10.1016/j.bcp.2007  |
| positive Regulation: TP53 --> chemosensitivity   | 19028473 | 10.1016/j.cbi.2008  |
| positive Regulation: TP53 --> chemosensitivity   | 11435891 | 10.1016/S0022-5347  |
| positive Regulation: TP53 --> chemosensitivity   |          | 10.1016/S0022-5347  |
| positive Regulation: TP53 --> chemosensitivity   | 10379742 | 10.1097/00005392-1  |
| positive Regulation: TP53 --> chemosensitivity   | 12175703 | 10.1016/S0024-3205  |
| positive Regulation: TP53 --> chemosensitivity   | 12409142 | 10.1016/S0024-3205  |
| positive Regulation: TP53 --> chemosensitivity   | 14761678 | 10.1016/j.taap.200  |
| positive Regulation: TP53 --> chemosensitivity   | 15891997 | 10.1016/j.humphath. |
| positive Regulation: TP53 --> chemosensitivity   | 12893182 | 10.1016/S0090-8258  |
| positive Regulation: TP53 --> chemosensitivity   | 12893182 | 10.1016/S0090-8258  |
| positive Regulation: TP53 --> chemosensitivity   | 15790436 | 10.1016/j.ygyno.20  |
| positive Regulation: TP53 --> chemosensitivity   | 15790436 | 10.1016/j.ygyno.20  |
| positive Regulation: TP53 --> chemosensitivity   | 16380178 | 10.1016/j.tibtech.  |
| positive Regulation: TP53 --> chemosensitivity   | 22446689 | 10.1016/j.jhep.201  |
| positive Regulation: TP53 --> chemosensitivity   | 11557115 | 10.1016/S0169-5002  |
| positive Regulation: TP53 --> chemosensitivity   | 16307839 | 10.1016/j.fct.2005  |
| positive Regulation: TP53 --> chemosensitivity   | 10737712 | 10.1016/S0304-3835  |
| positive Regulation: TP53 --> chemosensitivity   | 10893449 | 10.1016/S0304-3835  |
| positive Regulation: TP53 --> chemosensitivity   | 12880966 | 10.1016/S0304-3835  |
| positive Regulation: TP53 --> chemosensitivity   | 15327837 | 10.1016/j.canlet.2  |
| positive Regulation: TP53 --> chemosensitivity   | 16023288 | 10.1016/j.canlet.2  |
| positive Regulation: TP53 --> chemosensitivity   | 16919866 | 10.1016/j.canlet.2  |

|                               |                  |          |                    |
|-------------------------------|------------------|----------|--------------------|
| positive Regulation: TP53 --> | chemosensitivity | 18657356 | 10.1016/j.canlet.2 |
| positive Regulation: TP53 --> | chemosensitivity | 19467788 | 10.1016/j.ctrv.200 |
| positive Regulation: TP53 --> | chemosensitivity | 21856084 | 10.1016/j.mehy.201 |
| positive Regulation: TP53 --> | chemosensitivity | 22353361 | 10.1016/j.gene.201 |
| positive Regulation: TP53 --> | chemosensitivity |          | 10.1016/j.tiv.2012 |
| positive Regulation: TP53 --> | chemosensitivity | 17875383 | 10.1016/j.ijom.200 |
| positive Regulation: TP53 --> | chemosensitivity | 17875383 | 10.1016/j.ijom.200 |
| positive Regulation: TP53 --> | chemosensitivity | 16337111 | 10.1016/j.colsurfb |
| positive Regulation: TP53 --> | chemosensitivity | 16713222 | 10.1016/j.phymed.2 |
| positive Regulation: TP53 --> | chemosensitivity | 15691646 | 10.1016/j.ejca.200 |
| positive Regulation: TP53 --> | chemosensitivity | 16146690 | 10.1016/j.ejca.200 |
| positive Regulation: TP53 --> | chemosensitivity | 12850529 | 10.1016/S1040-8428 |
| positive Regulation: TP53 --> | chemosensitivity | 16253824 | 10.1053/j.semtcvs. |
| positive Regulation: TP53 --> | chemosensitivity | 19508919 | 10.1016/j.drudis.2 |
| positive Regulation: TP53 --> | chemosensitivity | 21195657 | 10.1016/j.drug.201 |
| positive Regulation: TP53 --> | chemosensitivity | 12829013 | 10.1016/S1471-4914 |
| positive Regulation: TP53 --> | chemosensitivity | 12726865 | 10.1016/S1535-6108 |
| positive Regulation: TP53 --> | chemosensitivity | 20832747 | 10.1016/j.ccr.2010 |
| positive Regulation: TP53 --> | chemosensitivity | 17240826 | 10.1016/j.thorsurg |
| positive Regulation: TP53 --> | chemosensitivity | 23040255 | 10.1053/j.seminonc |
| positive Regulation: TP53 --> | chemosensitivity | 22445862 | 10.1016/j.tiv.2012 |
| positive Regulation: TP53 --> | chemosensitivity | 23313858 | 10.1016/j.yexpr.20 |
| positive Regulation: TP53 --> | chemosensitivity | 23973262 | 10.1016/j.canlet.2 |
| positive Regulation: TP53 --> | chemosensitivity | 24462821 | 10.1016/j.canlet.2 |
| positive Regulation: TP53 --> | chemosensitivity | 25117446 | 10.1016/j.bbrc.201 |
| positive Regulation: TP53 --> | chemosensitivity | 25220870 | 10.1016/j.biochi.2 |
| positive Regulation: TP53 --> | chemosensitivity |          | 10.1016/j.toxlet.2 |
| positive Regulation: TP53 --> | chemosensitivity | 24681512 | 10.1016/j.phrs.201 |
| positive Regulation: TP53 --> | chemosensitivity | 24681512 | 10.1016/j.phrs.201 |
| positive Regulation: TP53 --> | chemosensitivity | 25448278 | 10.1016/j.toxlet.2 |
| positive Regulation: TP53 --> | chemosensitivity | 21293058 |                    |
| positive Regulation: TP53 --> | chemosensitivity | 21293058 |                    |
| positive Regulation: TP53 --> | chemosensitivity | 11095436 |                    |
| positive Regulation: TP53 --> | chemosensitivity | 11095436 |                    |
| positive Regulation: TP53 --> | chemosensitivity | 9768682  |                    |
| positive Regulation: TP53 --> | chemosensitivity | 9661637  |                    |
| positive Regulation: TP53 --> | chemosensitivity | 20075077 |                    |
| positive Regulation: TP53 --> | chemosensitivity | 19055826 |                    |
| positive Regulation: TP53 --> | chemosensitivity | 17626635 |                    |
| positive Regulation: TP53 --> | chemosensitivity | 17150101 |                    |
| positive Regulation: TP53 --> | chemosensitivity | 17121812 |                    |
| positive Regulation: TP53 --> | chemosensitivity | 16159878 |                    |
| positive Regulation: TP53 --> | chemosensitivity | 16120770 |                    |
| positive Regulation: TP53 --> | chemosensitivity | 15262986 |                    |
| positive Regulation: TP53 --> | chemosensitivity | 12890671 |                    |
| positive Regulation: TP53 --> | chemosensitivity | 12890671 |                    |
| positive Regulation: TP53 --> | chemosensitivity | 12690107 |                    |
| positive Regulation: TP53 --> | chemosensitivity | 12615954 |                    |
| positive Regulation: TP53 --> | chemosensitivity | 12481433 |                    |
| positive Regulation: TP53 --> | chemosensitivity | 12481433 |                    |
| positive Regulation: TP53 --> | chemosensitivity | 18818514 | 10.4161/cc.7.19.67 |
| positive Regulation: TP53 --> | chemosensitivity | 27313779 | 10.7150/jca.145061 |
| positive Regulation: TP53 --> | chemosensitivity | 27484708 | 10.1080/15384101.2 |
| positive Regulation: TP53 --> | chemosensitivity | 32492656 | 10.18632/aging.103 |

|                                |                  |          |                        |
|--------------------------------|------------------|----------|------------------------|
| positive Regulation: TP53 -->  | chemosensitivity | 27313779 | 10. 7150/jca. 145061   |
| positive Regulation: TP53 -->  | chemosensitivity | 12615954 |                        |
| positive Regulation: TP53 -->  | chemosensitivity | 12615954 |                        |
| positive Regulation: TP53 -->  | chemosensitivity | 12615954 |                        |
| positive Regulation: TP53 -->  | chemosensitivity | 9694807  |                        |
| positive Regulation: TP53 -->  | chemosensitivity | 14769944 |                        |
| positive Regulation: TP53 -->  | chemosensitivity | 11583579 |                        |
| positive Regulation: TP53 -->  | chemosensitivity | 11248087 |                        |
| positive Regulation: TP53 -->  | chemosensitivity | 9122197  |                        |
| positive Regulation: TP53 -->  | chemosensitivity | 16755297 |                        |
| positive Regulation: TP53 -->  | chemosensitivity | 15153941 |                        |
| positive Regulation: TP53 -->  | chemosensitivity | 14739942 |                        |
| positive Regulation: TP53 -->  | chemosensitivity | 11791171 |                        |
| positive Regulation: TP53 -->  | chemosensitivity | 11791171 |                        |
| positive Regulation: TP53 -->  | chemosensitivity | 11791171 |                        |
| positive Regulation: TP53 -->  | chemosensitivity | 11791171 |                        |
| positive Regulation: TP53 -->  | chemosensitivity | 11791171 |                        |
| positive Regulation: TP53 -->  | chemosensitivity | 10698490 |                        |
| positive Regulation: TP53 -->  | chemosensitivity | 10471039 |                        |
| positive Regulation: TP53 -->  | chemosensitivity | 16260623 |                        |
| positive Regulation: TP53 -->  | chemosensitivity | 20706634 |                        |
| positive Regulation: TP53 -->  | chemosensitivity | 27329169 | 10. 1007/s10549-016    |
| positive Regulation: TP53 -->  | chemosensitivity |          | 10. 1186/s13046-014    |
| positive Regulation: TP53 -->  | chemosensitivity | 27484466 | 10. 1186/s12885-016    |
| positive Regulation: TP53 -->  | chemosensitivity | 27485825 | 10. 3892/mmr. 2016. 5  |
| positive Regulation: TP53 -->  | chemosensitivity | 27485825 | 10. 3892/mmr. 2016. 5  |
| positive Regulation: TP53 -->  | chemosensitivity |          | 10. 1096/fj. 2016012   |
| positive Regulation: TP53 -->  | chemosensitivity |          | 10. 1096/fj. 2016012   |
| positive Regulation: TP53 -->  | chemosensitivity | 16973289 | 10. 1016/j. bbcan. 20  |
| positive Regulation: TP53 -->  | chemosensitivity | 18064040 |                        |
| positive Regulation: TP53 -->  | chemosensitivity | 28112370 | 10. 3892/or. 2017. 53  |
| positive Regulation: TP53 -->  | chemosensitivity | 8642047  | 10. 1007/bf01220804    |
| positive Regulation: TP53 -->  | chemosensitivity | 12615954 |                        |
| positive Regulation: TP53 -->  | chemosensitivity | 28467351 | 10. 3390/i jms180509   |
| positive Regulation: TP53 -->  | chemosensitivity | 22615851 | 10. 1371/journal. po   |
| positive Regulation: TP53 -->  | chemosensitivity | 30106452 | 10. 3892/or. 2018. 66  |
| positive Regulation: TP53 -->  | chemosensitivity | 30106452 | 10. 3892/or. 2018. 66  |
| positive Regulation: TP53 -->  | chemosensitivity |          | 10. 1186/s12935-018    |
| positive Regulation: TP53 -->  | chemosensitivity | 30387834 | 10. 3892/i jo. 2018. 4 |
| positive Regulation: TP53 -->  | chemosensitivity |          | 10. 4149/neo_2018_1    |
| positive Regulation: TP53 -->  | chemosensitivity | 31108984 | 10. 3390/i jms201024   |
| positive Regulation: TP53 -->  | chemosensitivity |          | 10. 1186/s12935-019    |
| positive Regulation: TP53 -->  | chemosensitivity | 32377739 | 10. 3892/mmr. 2020. 1  |
| positive Regulation: TP53 -->  | chemosensitivity |          | 10. 1042/BSR2019148    |
| positive Regulation: TP53 -->  | chemosensitivity |          | 10. 1042/BSR2019148    |
| positive Regulation: TP53 -->  | chemosensitivity | 33184290 | 10. 1038/s41419-020    |
| positive Regulation: TP53 -->  | chemosensitivity | 33184290 | 10. 1038/s41419-020    |
| positive Regulation: TP53 -->  | chemosensitivity | 33256191 | 10. 3390/i jms212389   |
| positive Regulation: TP53 -->  | chemosensitivity |          | 10. 1016/j. jbior. 20  |
| positive Regulation: TP53 -->  | chemosensitivity | 32876741 | 10. 1007/s00508-020    |
| positive Regulation: TP53 -->  | chemosensitivity | 33785447 | 10. 1016/j. semcance   |
| positive Regulation: TP53 -->  | chemosensitivity |          | 10. 1016/j. omtn. 202  |
| positive Regulation: TP53 -->  | chemosensitivity |          | 10. 1016/j. jtcms. 20  |
| positive Regulation: WWTR1 --> | chemosensitivity | 32898567 | 10. 1016/j. abb. 2020  |

|                                                   |          |                    |
|---------------------------------------------------|----------|--------------------|
| positive Regulation: WWTR1 --> chemosensitivity   | 32898567 | 10.1016/j.abb.2020 |
| positive Regulation: WWTR1 --> chemosensitivity   | 28737828 | 10.3892/or.2017.58 |
| positive Regulation: WWTR1 --> chemosensitivity   | 28749195 | 10.1080/15384101.2 |
| positive Regulation: WWTR1 --> chemosensitivity   | 32898567 | 10.1016/j.abb.2020 |
| positive Regulation: WWTR1 --> chemosensitivity   | 35604626 | 10.1007/s11033-022 |
| positive Regulation: TLE3 --> chemosensitivity    | 33571907 | 10.1016/j.bbrc.202 |
| positive Regulation: MIR455 --> chemosensitivity  | 35582195 | 10.1515/med-2022-0 |
| positive Regulation: MIR1278 --> chemosensitivity | 32407879 | 10.1016/j.mcp.2020 |
| positive Regulation: CYC1 --> chemosensitivity    | 31149728 | 10.14670/HH-18-130 |
| positive Regulation: CYC1 --> chemosensitivity    | 31149728 | 10.14670/HH-18-130 |
| positive Regulation: CYC1 --> chemosensitivity    | 31149728 | 10.14670/HH-18-130 |
| positive Regulation: CTSS --> chemosensitivity    | 25755832 |                    |
| positive Regulation: TNFSF10 --> chemosensitivity | 21514380 | 10.1016/j.bbadis.2 |
| positive Regulation: TNFSF10 --> chemosensitivity | 11472983 |                    |
| positive Regulation: TNFSF10 --> chemosensitivity | 11803469 |                    |
| positive Regulation: TNFSF10 --> chemosensitivity | 31119375 | 10.1007/s00280-019 |
| positive Regulation: TNFSF10 --> chemosensitivity | 22372904 | 10.5858/arpa.2011- |
| positive Regulation: TNFSF10 --> chemosensitivity | 17283156 | 10.1158/0008-5472. |
| positive Regulation: TNFSF10 --> chemosensitivity | 34048180 | 10.31557/APJCP.202 |
| positive Regulation: TNFSF10 --> chemosensitivity |          |                    |
| positive Regulation: IKZF3 --> chemosensitivity   | 25524659 | 10.3892/or.2014.36 |
| positive Regulation: FHIT --> chemosensitivity    | 27166255 | 10.18632/oncotarge |
| positive Regulation: FHIT --> chemosensitivity    | 34901149 | 10.3389/fmolb.2021 |
| positive Regulation: FBP1 --> chemosensitivity    | 28990097 | 10.3892/mmr.2017.7 |
| positive Regulation: FBP1 --> chemosensitivity    | 28990097 | 10.3892/mmr.2017.7 |
| positive Regulation: FBP1 --> chemosensitivity    | 28990097 | 10.3892/mmr.2017.7 |
| positive Regulation: EPHA3 --> chemosensitivity   | 27101199 | 10.1007/s13277-016 |
| positive Regulation: AMBN --> chemosensitivity    | 28054649 | 10.1038/srep401871 |
| positive Regulation: MIR489 --> chemosensitivity  | 30551491 | 10.1016/j.biopha.2 |
| positive Regulation: MIR489 --> chemosensitivity  | 31378911 | 10.26355/eurrev_20 |
| positive Regulation: MIR489 --> chemosensitivity  | 27171498 | 10.1002/path.47431 |
| positive Regulation: NRBP2 --> chemosensitivity   | 27634758 | 10.1158/0008-5472. |
| positive Regulation: NRBP2 --> chemosensitivity   | 35648115 | 10.1007/s11010-022 |
| positive Regulation: PTPN6 --> chemosensitivity   | 33615510 | 10.1002/cbf.360410 |
| positive Regulation: PTPN6 --> chemosensitivity   | 33615510 | 10.1002/cbf.360410 |
| positive Regulation: MIR506 --> chemosensitivity  | 30558723 | 10.1016/j.ajpath.2 |
| positive Regulation: MIR506 --> chemosensitivity  | 32681832 | 10.1016/j.abb.2020 |
| positive Regulation: MIR506 --> chemosensitivity  | 30553455 | 10.1016/j.bbrc.201 |
| positive Regulation: MIR506 --> chemosensitivity  | 33711308 | 10.1016/j.ejphar.2 |
| positive Regulation: MIR506 --> chemosensitivity  | 28254409 | 10.1016/j.canlet.2 |
| positive Regulation: MIR506 --> chemosensitivity  | 27065335 | 10.1038/onc.2016.9 |
| positive Regulation: MIR506 --> chemosensitivity  | 27065335 | 10.1038/onc.2016.9 |
| positive Regulation: MIR506 --> chemosensitivity  | 27065335 | 10.1038/onc.2016.9 |
| positive Regulation: MIR506 --> chemosensitivity  | 27065335 | 10.1038/onc.2016.9 |
| positive Regulation: MIR506 --> chemosensitivity  | 27065335 | 10.1038/onc.2016.9 |
| positive Regulation: MIR506 --> chemosensitivity  | 29788724 | 10.4149/neo_2018_1 |
| positive Regulation: MIR506 --> chemosensitivity  | 25793370 | 10.1371/journal.po |
| positive Regulation: MIR506 --> chemosensitivity  | 26935526 | 10.3892/or.2016.46 |
| positive Regulation: MIR506 --> chemosensitivity  | 24608427 | 10.1038/onc.2014.9 |
| positive Regulation: MIR506 --> chemosensitivity  | 27065335 | 10.1038/onc.2016.9 |
| positive Regulation: MIR506 --> chemosensitivity  | 35715750 | 10.1186/s11658-022 |
| positive Regulation: SCN5A --> chemosensitivity   | 33338532 | 10.1016/j.canlet.2 |
| positive Regulation: SCN5A --> chemosensitivity   | 33338532 | 10.1016/j.canlet.2 |
| positive Regulation: SCN5A --> chemosensitivity   | 34091433 | 10.1016/j.canlet.2 |

|                                   |                  |          |                    |
|-----------------------------------|------------------|----------|--------------------|
| positive Regulation: SMAD3 -->    | chemosensitivity | 27110775 | 10.3390/ijms170406 |
| positive Regulation: MIR125B1 --> | chemosensitivity | 28122310 | 10.1016/j.biopha.2 |
| positive Regulation: MIR125B1 --> | chemosensitivity | 32243895 | 10.1016/j.ygeno.20 |
| positive Regulation: MIR125B1 --> | chemosensitivity | 32461153 | 10.1016/j.semcance |
| positive Regulation: MIR125B1 --> | chemosensitivity | 25042866 | 10.1016/j.canlet.2 |
| positive Regulation: MIR125B1 --> | chemosensitivity | 28695772 | 10.1177/1010428317 |
| positive Regulation: MIR125B1 --> | chemosensitivity | 28628119 | 10.1038/onc.2017.1 |
| positive Regulation: MIR125B1 --> | chemosensitivity | 30896792 | 10.3892/ijo.2019.4 |
| positive Regulation: MIR125B1 --> | chemosensitivity | 33348804 | 10.3390/ijms212496 |
| positive Regulation: MIR125B1 --> | chemosensitivity | 23497288 | 10.1186/1475-2867- |
| positive Regulation: MIR125B1 --> | chemosensitivity | 23497288 | 10.1186/1475-2867- |
| positive Regulation: MIR125B1 --> | chemosensitivity | 23497288 | 10.1186/1475-2867- |
| positive Regulation: MIR125B1 --> | chemosensitivity | 25532106 | 10.1371/journal.po |
| positive Regulation: MIR125B1 --> | chemosensitivity | 25756509 | 10.1080/15384047.2 |
| positive Regulation: MIR125B1 --> | chemosensitivity | 26596831 | 10.1007/s13277-015 |
| positive Regulation: MIR125B1 --> | chemosensitivity | 24643683 | 10.1007/s13277-014 |
| positive Regulation: MIR125B1 --> | chemosensitivity | 24846940 | 10.3724/sp.j.1005. |
| positive Regulation: MIR125B1 --> | chemosensitivity | 26744308 | 10.1177/1533034615 |
| positive Regulation: MIR125B1 --> | chemosensitivity | 34888842 | 10.1007/978-3-030- |
| positive Regulation: MIR125B1 --> | chemosensitivity | 35730423 | 10.5603/FHC.a2022. |
| positive Regulation: CACNA2D3 --> | chemosensitivity | 31746409 | 10.3892/or.2019.73 |
| positive Regulation: FASN -->     | chemosensitivity | 28339092 | 10.3892/or.2017.55 |
| positive Regulation: FASN -->     | chemosensitivity | 31043565 | 10.1073/pnas.18194 |
| positive Regulation: FASN -->     | chemosensitivity | 34131808 | 10.1007/s00018-021 |
| positive Regulation: FASN -->     | chemosensitivity | 26484401 | 10.1667/RR14173.1  |
| positive Regulation: FASN -->     | chemosensitivity | 33752312 | 10.3760/cma.j.cn11 |
| positive Regulation: FASN -->     | chemosensitivity |          | 10.3390/ijms222111 |
| positive Regulation: MICA -->     | chemosensitivity | 32724354 | 10.3892/o1.2020.11 |
| positive Regulation: ATF3 -->     | chemosensitivity | 26961878 | 10.1074/jbc.M115.6 |
| positive Regulation: ATF3 -->     | chemosensitivity | 31273338 | 10.1038/s41388-019 |
| positive Regulation: ATF3 -->     | chemosensitivity | 31273338 | 10.1038/s41388-019 |
| positive Regulation: ATF3 -->     | chemosensitivity | 31273338 | 10.1038/s41388-019 |
| positive Regulation: ATF3 -->     | chemosensitivity | 31273338 | 10.1038/s41388-019 |
| positive Regulation: ATF3 -->     | chemosensitivity | 35129760 | 10.1007/s11262-022 |
| positive Regulation: SGK1 -->     | chemosensitivity | 28504714 | 10.1038/onc.2017.1 |
| positive Regulation: KCNH2 -->    | chemosensitivity | 22020779 | 10.3892/or.2011.15 |
| positive Regulation: KCNH2 -->    | chemosensitivity | 22020779 | 10.3892/or.2011.15 |
| positive Regulation: KCNH2 -->    | chemosensitivity | 22020779 | 10.3892/or.2011.15 |
| positive Regulation: MIR24-1 -->  | chemosensitivity | 32089062 | 10.1080/15384047.2 |
| positive Regulation: MIR24-1 -->  | chemosensitivity | 31548657 | 10.1038/s41417-019 |
| positive Regulation: MIR24-1 -->  | chemosensitivity | 27513190 | 10.2217/fon-2016-0 |
| positive Regulation: MIR24-1 -->  | chemosensitivity | 31646794 |                    |
| positive Regulation: MIR24-1 -->  | chemosensitivity | 31646794 |                    |
| positive Regulation: MIR24-1 -->  | chemosensitivity | 32521898 |                    |
| positive Regulation: MIR24-1 -->  | chemosensitivity | 32521898 |                    |
| positive Regulation: MIR24-1 -->  | chemosensitivity | 35397087 | 10.1007/s11033-022 |
| positive Regulation: DOP1B -->    | chemosensitivity | 34781999 | 10.1186/s13046-021 |
| positive Regulation: DOP1B -->    | chemosensitivity | 34781999 | 10.1186/s13046-021 |
| positive Regulation: DOP1B -->    | chemosensitivity | 35164815 | 10.1186/s13046-022 |
| positive Regulation: DOP1B -->    | chemosensitivity | 35164815 | 10.1186/s13046-022 |
| positive Regulation: PLK2 -->     | chemosensitivity | 22138223 | 10.1016/j.biocel.2 |
| positive Regulation: PLK2 -->     | chemosensitivity | 33176854 | 10.1186/s13046-020 |
| positive Regulation: PLK2 -->     | chemosensitivity | 33176854 | 10.1186/s13046-020 |
| positive Regulation: PLK2 -->     | chemosensitivity | 33176854 | 10.1186/s13046-020 |

|                                                  |          |                    |
|--------------------------------------------------|----------|--------------------|
| positive Regulation: PLK2 --> chemosensitivity   | 33176854 | 10.1186/s13046-020 |
| positive Regulation: PLK2 --> chemosensitivity   | 33176854 | 10.1186/s13046-020 |
| positive Regulation: PLK2 --> chemosensitivity   | 33176854 | 10.1186/s13046-020 |
| positive Regulation: PLK2 --> chemosensitivity   | 21402713 | 10.1158/0008-5472. |
| positive Regulation: MIR330 --> chemosensitivity | 28521444 | 10.3892/ol.2017.58 |
| positive Regulation: MIR330 --> chemosensitivity | 28521444 | 10.3892/ol.2017.58 |
| positive Regulation: MIR29C --> chemosensitivity | 31047896 | 10.1016/j.lfs.2019 |
| positive Regulation: MIR29C --> chemosensitivity | 29355660 | 10.1016/j.canlet.2 |
| positive Regulation: MIR29C --> chemosensitivity | 33989708 | 10.1016/j.canlet.2 |
| positive Regulation: MIR29C --> chemosensitivity | 33035835 | 10.1016/j.biopha.2 |
| positive Regulation: MIR29C --> chemosensitivity | 29807360 | 10.1159/000490027  |
| positive Regulation: MIR29C --> chemosensitivity | 29807360 | 10.1159/000490027  |
| positive Regulation: MIR29C --> chemosensitivity | 29807360 | 10.1159/000490027  |
| positive Regulation: MIR29C --> chemosensitivity | 29807360 | 10.1159/000490027  |
| positive Regulation: MIR29C --> chemosensitivity | 29807360 | 10.1159/000490027  |
| positive Regulation: MIR29C --> chemosensitivity | 29807360 | 10.1159/000490027  |
| positive Regulation: MIR29C --> chemosensitivity | 29807360 | 10.1159/000490027  |
| positive Regulation: MIR29C --> chemosensitivity | 29807360 | 10.1159/000490027  |
| positive Regulation: MIR29C --> chemosensitivity | 31753063 | 10.3727/096504019X |
| positive Regulation: MIR29C --> chemosensitivity | 31753063 | 10.3727/096504019X |
| positive Regulation: MIR29C --> chemosensitivity | 29807360 | 10.1159/0004900271 |
| positive Regulation: MIR29C --> chemosensitivity | 31753063 | 10.3727/096504019X |
| positive Regulation: MIR770 --> chemosensitivity | 28922711 | 10.1016/j.biopha.2 |
| positive Regulation: MIR770 --> chemosensitivity | 29323124 | 10.1038/s41419-017 |
| positive Regulation: MIR770 --> chemosensitivity | 29323124 | 10.1038/s41419-017 |
| positive Regulation: MIR770 --> chemosensitivity | 29323124 | 10.1038/s41419-017 |
| positive Regulation: MIR770 --> chemosensitivity | 30524203 | 10.1186/s12935-018 |
| positive Regulation: MIR770 --> chemosensitivity | 33630753 | 10.1530/EJE-20-117 |
| positive Regulation: MIR770 --> chemosensitivity | 27449101 | 10.18632/oncotarge |
| positive Regulation: STK11 --> chemosensitivity  | 29257268 | 10.3892/mmr.2017.8 |
| positive Regulation: STK11 --> chemosensitivity  | 29257268 | 10.3892/mmr.2017.8 |
| positive Regulation: STK11 --> chemosensitivity  | 29257268 | 10.3892/mmr.2017.8 |
| positive Regulation: IL1A --> chemosensitivity   | 32760201 | 10.7150/ijbs.46651 |
| positive Regulation: RYBP --> chemosensitivity   | 27060496 | 10.1016/j.cellsig. |
| positive Regulation: NEK6 --> chemosensitivity   | 30153958 | 10.1016/j.prp.2018 |
| positive Regulation: UNC5D --> chemosensitivity  | 24518784 | 10.1016/j.juro.201 |
| positive Regulation: CD82 --> chemosensitivity   | 32203165 | 10.1038/s41388-020 |
| positive Regulation: ARID3A --> chemosensitivity | 35257428 | 10.1002/cbin.11789 |
| positive Regulation: ARID3A --> chemosensitivity | 35257428 | 10.1002/cbin.11789 |
| positive Regulation: ARID3A --> chemosensitivity | 35257428 | 10.1002/cbin.11789 |
| positive Regulation: MIR497 --> chemosensitivity | 28705657 | 10.1016/j.freeradb |
| positive Regulation: MIR497 --> chemosensitivity | 28820062 | 10.2174/0929866524 |
| positive Regulation: MIR497 --> chemosensitivity | 30535471 | 10.3892/ijmm.2018. |
| positive Regulation: MIR497 --> chemosensitivity | 30535471 | 10.3892/ijmm.2018. |
| positive Regulation: MIR497 --> chemosensitivity | 24667580 | 10.1371/journal.po |
| positive Regulation: MIR497 --> chemosensitivity | 24667580 | 10.1371/journal.po |
| positive Regulation: MIR497 --> chemosensitivity | 24667580 | 10.1371/journal.po |
| positive Regulation: MIR497 --> chemosensitivity | 26673620 | 10.18632/oncotarge |
| positive Regulation: MIR497 --> chemosensitivity | 26673620 | 10.18632/oncotarge |
| positive Regulation: MIR497 --> chemosensitivity | 27904781 |                    |
| positive Regulation: MIR497 --> chemosensitivity | 27904781 |                    |
| positive Regulation: MIR497 --> chemosensitivity | 33015042 | 10.3389/fcell.2020 |
| positive Regulation: MIR497 --> chemosensitivity | 33179318 | 10.1111/cas.147331 |
| positive Regulation: MIR497 --> chemosensitivity | 34440380 | 10.3390/genes12081 |
| positive Regulation: MIR497 --> chemosensitivity | 35116999 | 10.21037/tcr.2019. |
| positive Regulation: MIR497 --> chemosensitivity |          | 10.1016/j.semcance |

|                                                    |          |                    |
|----------------------------------------------------|----------|--------------------|
| positive Regulation: OSM --> chemosensitivity      | 22469558 | 10.1016/j.ctrv.201 |
| positive Regulation: OSM --> chemosensitivity      | 23358473 | 10.4161/cbt.23622  |
| positive Regulation: DKK1 --> chemosensitivity     | 26799283 | 10.18632/oncotarge |
| positive Regulation: CDKN2D --> chemosensitivity   | 22762204 | 10.1042/BSR2011012 |
| positive Regulation: MIR107 --> chemosensitivity   | 27498977 | 10.3892/ijo.2016.3 |
| positive Regulation: MIR107 --> chemosensitivity   | 27498977 | 10.3892/ijo.2016.3 |
| positive Regulation: MIR107 --> chemosensitivity   | 33901009 | 10.18632/aging.202 |
| positive Regulation: MIR107 --> chemosensitivity   | 33901009 | 10.18632/aging.202 |
| positive Regulation: MIR107 --> chemosensitivity   | 33901009 | 10.18632/aging.202 |
| positive Regulation: MIR107 --> chemosensitivity   | 33901009 | 10.18632/aging.202 |
| positive Regulation: MIR107 --> chemosensitivity   | 33901009 | 10.18632/aging.202 |
| positive Regulation: MIR107 --> chemosensitivity   | 33901009 | 10.18632/aging.202 |
| positive Regulation: MIR107 --> chemosensitivity   | 25400821 |                    |
| positive Regulation: MIR107 --> chemosensitivity   | 28979809 |                    |
| positive Regulation: MIR107 --> chemosensitivity   | 33901009 | 10.18632/aging.202 |
| positive Regulation: FGF10 --> chemosensitivity    | 24865969 | 10.1128/MCB.00871- |
| positive Regulation: FGF10 --> chemosensitivity    |          | 10.1128/MCB.00871- |
| positive Regulation: MIR127 --> chemosensitivity   | 27590853 | 10.1016/j.biocel.2 |
| positive Regulation: MIR127 --> chemosensitivity   | 32742197 | 10.1186/s12935-020 |
| positive Regulation: MIR127 --> chemosensitivity   | 32742197 | 10.1186/s12935-020 |
| positive Regulation: ESR2 --> chemosensitivity     | 29669750 | 10.1124/pr.117.014 |
| positive Regulation: ESR2 --> chemosensitivity     | 31297554 | 10.1007/s00280-019 |
| positive Regulation: ESR2 --> chemosensitivity     | 22398780 | 10.1007/s00432-011 |
| positive Regulation: ESR2 --> chemosensitivity     | 24339738 | 10.1593/neo.131184 |
| positive Regulation: ESR2 --> chemosensitivity     | 24339738 | 10.1593/neo.131184 |
| positive Regulation: ESR2 --> chemosensitivity     | 29854295 | 10.18632/oncotarge |
| positive Regulation: MIRLET7B --> chemosensitivity | 30857828 | 10.1016/j.bcp.2019 |
| positive Regulation: MIRLET7B --> chemosensitivity | 23806108 | 10.1186/1756-9966- |
| positive Regulation: MIRLET7B --> chemosensitivity | 25951903 | 10.1186/s12957-015 |
| positive Regulation: CASC2 --> chemosensitivity    | 28495512 | 10.1016/j.abb.2017 |
| positive Regulation: CASC2 --> chemosensitivity    | 28495512 | 10.1016/j.abb.2017 |
| positive Regulation: CASC2 --> chemosensitivity    | 28495512 | 10.1016/j.abb.2017 |
| positive Regulation: CASC2 --> chemosensitivity    | 29373811 | 10.1016/j.abb.2018 |
| positive Regulation: CASC2 --> chemosensitivity    | 32271431 | 10.26355/eurrev_20 |
| positive Regulation: CASC2 --> chemosensitivity    | 32787433 | 10.4149/neo_2020_1 |
| positive Regulation: CASC2 --> chemosensitivity    | 32787433 | 10.4149/neo_2020_1 |
| positive Regulation: CASC2 --> chemosensitivity    | 32787433 | 10.4149/neo_2020_1 |
| positive Regulation: CASC2 --> chemosensitivity    | 32787433 | 10.4149/neo_2020_1 |
| positive Regulation: CASC2 --> chemosensitivity    | 34229588 | 10.2174/1871520621 |
| positive Regulation: SDHAP1 --> chemosensitivity   | 32211849 | 10.1093/jb/mvaa036 |
| positive Regulation: MIR15A --> chemosensitivity   | 30317163 | 10.1016/j.omtn.201 |
| positive Regulation: MIR15A --> chemosensitivity   | 25945419 | 10.1080/15384047.2 |
| positive Regulation: MIR15A --> chemosensitivity   | 25945419 | 10.1080/15384047.2 |
| positive Regulation: MIR15A --> chemosensitivity   | 29467857 | 10.3892/etm.2017.5 |
| positive Regulation: MIR15A --> chemosensitivity   | 29467857 | 10.3892/etm.2017.5 |
| positive Regulation: MIR15A --> chemosensitivity   | 34785950 | 10.2147/CMAR.S3338 |
| positive Regulation: SNORD3A --> chemosensitivity  | 32382150 | 10.1038/s41419-020 |
| positive Regulation: SNORD3A --> chemosensitivity  | 32382150 | 10.1038/s41419-020 |
| positive Regulation: SNORD3A --> chemosensitivity  | 32382150 | 10.1038/s41419-020 |
| positive Regulation: SNORD3A --> chemosensitivity  | 32382150 | 10.1038/s41419-020 |
| positive Regulation: SNORD3A --> chemosensitivity  | 32382150 | 10.1038/s41419-020 |
| positive Regulation: SNORD3A --> chemosensitivity  | 32382150 | 10.1038/s41419-020 |
| positive Regulation: SNORD3A --> chemosensitivity  | 32382150 | 10.1038/s41419-020 |
| positive Regulation: SNORD3A --> chemosensitivity  | 32382150 | 10.1038/s41419-020 |
| positive Regulation: SLX4 --> chemosensitivity     | 27284361 | 10.3892/ol.2016.44 |



|                                                    |                             |
|----------------------------------------------------|-----------------------------|
| positive Regulation: TSC22D1 --> chemosensitivity  | 10.1016/S0006-291X          |
| positive Regulation: TSC22D1 --> chemosensitivity  | 10854535 10.3892/or.7.4.737 |
| positive Regulation: TSC22D1 --> chemosensitivity  | 15379637 10.2174/1568009043 |
| positive Regulation: MIR451A --> chemosensitivity  | 29627370 10.1016/j.addr.201 |
| positive Regulation: MIR451A --> chemosensitivity  | 31708373 10.1016/j.prp.2019 |
| positive Regulation: MIR451A --> chemosensitivity  | 33926792 10.1016/j.semcd.2  |
| positive Regulation: MIR451A --> chemosensitivity  | 31147293 10.1016/j.ebiom.20 |
| positive Regulation: MIR451A --> chemosensitivity  | 21329503                    |
| positive Regulation: MIR451A --> chemosensitivity  | 21329503                    |
| positive Regulation: MIR451A --> chemosensitivity  | 21329503                    |
| positive Regulation: MIR451A --> chemosensitivity  | 21329503                    |
| positive Regulation: MIR451A --> chemosensitivity  | 21329503                    |
| positive Regulation: MIR451A --> chemosensitivity  | 21329503                    |
| positive Regulation: MIR451A --> chemosensitivity  | 27573896 10.1007/978-3-319- |
| positive Regulation: MIR451A --> chemosensitivity  | 27686452 10.1007/s11010-016 |
| positive Regulation: MIR451A --> chemosensitivity  | 34257614 10.3389/pore.2021. |
| positive Regulation: MIR451A --> chemosensitivity  | 21329503 10.1186/1756-9966- |
| positive Regulation: MIR451A --> chemosensitivity  | 21329503 10.1186/1756-9966- |
| positive Regulation: MIR451A --> chemosensitivity  | 21329503 10.1186/1756-9966- |
| positive Regulation: MIR451A --> chemosensitivity  | 21329503 10.1186/1756-9966- |
| positive Regulation: MIR451A --> chemosensitivity  | 21329503 10.1186/1756-9966- |
| positive Regulation: MIR451A --> chemosensitivity  | 21329503 10.1186/1756-9966- |
| positive Regulation: MIR451A --> chemosensitivity  | 24788655 10.1371/journal.po |
| positive Regulation: MIR451A --> chemosensitivity  | 25135964 10.1098/rstb.2013. |
| positive Regulation: MIR451A --> chemosensitivity  | 25322930 10.3892/or.2014.35 |
| positive Regulation: MIR451A --> chemosensitivity  | 35126514 10.1155/2022/25210 |
| positive Regulation: MIR451A --> chemosensitivity  | 34993725 10.1007/s11033-021 |
| positive Regulation: MIR451A --> chemosensitivity  | 35031927 10.1007/s11033-021 |
| positive Regulation: MIR512-1 --> chemosensitivity | 31777256 10.4149/neo_2019_1 |
| positive Regulation: MIR512-1 --> chemosensitivity | 31777256 10.4149/neo_2019_1 |
| positive Regulation: MIR512-1 --> chemosensitivity | 31777256 10.4149/neo_2019_1 |
| positive Regulation: MIR512-1 --> chemosensitivity | 31777256 10.4149/neo_2019_1 |
| positive Regulation: MIR512-1 --> chemosensitivity | 31777256 10.4149/neo_2019_1 |
| positive Regulation: CREBZF --> chemosensitivity   | 22983008 10.4161/cc.22133   |
| positive Regulation: MIR34C --> chemosensitivity   | 26975503 10.1186/s12885-016 |
| positive Regulation: MIR34C --> chemosensitivity   | 32228202 10.1177/0300060520 |
| positive Regulation: MIR34C --> chemosensitivity   | 32228202 10.1177/0300060520 |
| positive Regulation: MIR34C --> chemosensitivity   | 32228202 10.1177/0300060520 |
| positive Regulation: MIR34C --> chemosensitivity   | 32228202 10.1177/0300060520 |
| positive Regulation: MIR34C --> chemosensitivity   | 32228202 10.1177/0300060520 |
| positive Regulation: MIR34C --> chemosensitivity   | 32228202 10.1177/0300060520 |
| positive Regulation: MIR34C --> chemosensitivity   | 32228202 10.1177/0300060520 |
| positive Regulation: MIR34C --> chemosensitivity   | 32700743 10.1042/BSR2019406 |
| positive Regulation: MIR34C --> chemosensitivity   | 24802328 10.1007/s12032-014 |
| positive Regulation: MIR34C --> chemosensitivity   | 23423488 10.1007/s00280-013 |
| positive Regulation: HOXD10 --> chemosensitivity   | 34790580 10.3389/fonc.2021. |
| positive Regulation: SIRT3 --> chemosensitivity    | 29191657 10.1016/j.bbrc.201 |
| positive Regulation: SIRT3 --> chemosensitivity    | 32243871 10.1016/j.ejphar.2 |
| positive Regulation: SIRT3 --> chemosensitivity    | 32229158 10.1016/j.gene.202 |
| positive Regulation: SIRT3 --> chemosensitivity    | 32229158 10.1016/j.gene.202 |
| positive Regulation: SIRT3 --> chemosensitivity    | 32229158 10.1016/j.gene.202 |
| positive Regulation: SIRT3 --> chemosensitivity    | 32229158 10.1016/j.gene.202 |
| positive Regulation: SIRT3 --> chemosensitivity    | 32229158 10.1016/j.gene.202 |
| positive Regulation: SIRT3 --> chemosensitivity    | 10.3390/cimb440100          |
| positive Regulation: SIRT3 --> chemosensitivity    | 35159089 10.3390/cancers140 |
| positive Regulation: SHH --> chemosensitivity      | 30053447 10.1016/j.lfs.2018 |
| positive Regulation: KCNQ1 --> chemosensitivity    | 31454677 10.1016/j.omtn.201 |

|                                                   |          |                    |
|---------------------------------------------------|----------|--------------------|
| positive Regulation: KCNQ1 --> chemosensitivity   | 31454677 | 10.1016/j.omtn.201 |
| positive Regulation: TOP2A --> chemosensitivity   | 25710584 | 10.1097/PAI.000000 |
| positive Regulation: MIR199B --> chemosensitivity | 30325582 | 10.1002/iub.188910 |
| positive Regulation: EHMT2 --> chemosensitivity   | 35640269 | 10.1093/carcin/bga |
| positive Regulation: MIR9-1 --> chemosensitivity  | 32497683 | 10.1016/j.semcance |
| positive Regulation: MIR9-1 --> chemosensitivity  | 28260112 | 10.3892/or.2017.54 |
| positive Regulation: MIR9-1 --> chemosensitivity  | 28260112 | 10.3892/or.2017.54 |
| positive Regulation: MIR9-1 --> chemosensitivity  | 28260112 | 10.3892/or.2017.54 |
| positive Regulation: MIR9-1 --> chemosensitivity  | 28260112 | 10.3892/or.2017.54 |
| positive Regulation: MIR9-1 --> chemosensitivity  | 28260112 | 10.3892/or.2017.54 |
| positive Regulation: MIR9-1 --> chemosensitivity  | 28260112 | 10.3892/or.2017.54 |
| positive Regulation: MIR9-1 --> chemosensitivity  | 28358371 | 10.1038/cddis.2017 |
| positive Regulation: MIR9-1 --> chemosensitivity  | 32071552 | 10.7150/ijbs.32460 |
| positive Regulation: MIR9-1 --> chemosensitivity  | 32071552 | 10.7150/ijbs.32460 |
| positive Regulation: MIR9-1 --> chemosensitivity  | 26152689 | 10.1186/s12885-015 |
| positive Regulation: MIR9-1 --> chemosensitivity  | 26152689 | 10.1186/s12885-015 |
| positive Regulation: MIR9-1 --> chemosensitivity  | 25571061 | 10.1109/EMBC.2014. |
| positive Regulation: MIR9-1 --> chemosensitivity  | 34185245 | 10.1007/s11010-021 |
| positive Regulation: BRIP1 --> chemosensitivity   | 26680099 | 10.1016/j.gene.201 |
| positive Regulation: BRIP1 --> chemosensitivity   | 33790078 | 10.1248/CPB.C20-00 |
| positive Regulation: BRIP1 --> chemosensitivity   | 26680099 | 10.1016/j.gene.201 |
| positive Regulation: DPP4 --> chemosensitivity    | 22261805 | 10.1158/1078-0432. |
| positive Regulation: MIR202 --> chemosensitivity  | 29559564 | 10.1042/BSR2017138 |
| positive Regulation: ECM1 --> chemosensitivity    | 31319137 | 10.1016/j.canlet.2 |
| positive Regulation: ECM1 --> chemosensitivity    | 31319137 | 10.1016/j.canlet.2 |
| positive Regulation: ECM1 --> chemosensitivity    | 31319137 | 10.1016/j.canlet.2 |
| positive Regulation: ECM1 --> chemosensitivity    | 31319137 | 10.1016/j.canlet.2 |
| positive Regulation: CD99 --> chemosensitivity    |          | 10.1016/j.clml.201 |
| positive Regulation: MIR1182 --> chemosensitivity | 26772886 | 10.1016/j.bbrc.201 |
| positive Regulation: MIR1182 --> chemosensitivity | 26772886 | 10.1016/j.bbrc.201 |
| positive Regulation: MIR1182 --> chemosensitivity | 26772886 | 10.1016/j.bbrc.201 |
| positive Regulation: MIR1182 --> chemosensitivity | 26772886 | 10.1016/j.bbrc.201 |
| positive Regulation: MIR1182 --> chemosensitivity | 26772886 | 10.1016/j.bbrc.201 |
| positive Regulation: MIR1182 --> chemosensitivity | 26772886 | 10.1016/j.bbrc.201 |
| positive Regulation: MIR1182 --> chemosensitivity | 29526163 | 10.1186/s12929-018 |
| positive Regulation: MIR1182 --> chemosensitivity | 26772886 | 10.1016/j.bbrc.201 |
| positive Regulation: MIR1182 --> chemosensitivity | 26772886 | 10.1016/j.bbrc.201 |
| positive Regulation: NOD1 --> chemosensitivity    | 31872284 | 10.1007/s00109-019 |
| positive Regulation: CYLD --> chemosensitivity    | 27448305 | 10.1007/s13277-016 |
| positive Regulation: CYLD --> chemosensitivity    | 27448305 | 10.1007/s13277-016 |
| positive Regulation: CYLD --> chemosensitivity    | 27448305 | 10.1007/s13277-016 |
| positive Regulation: CYLD --> chemosensitivity    | 27448305 | 10.1007/s13277-016 |
| positive Regulation: CYLD --> chemosensitivity    | 27448305 | 10.1007/s13277-016 |
| positive Regulation: CYLD --> chemosensitivity    | 27448305 | 10.1007/s13277-016 |
| positive Regulation: CYLD --> chemosensitivity    | 27448305 | 10.1007/s13277-016 |
| positive Regulation: CYLD --> chemosensitivity    | 27448305 | 10.1007/s13277-016 |
| positive Regulation: OLA1 --> chemosensitivity    | 32528278 | 10.3389/fphar.2020 |
| positive Regulation: PIK3R3 --> chemosensitivity  | 29370570 | 10.1080/15384047.2 |
| positive Regulation: PIK3R3 --> chemosensitivity  | 29370570 | 10.1080/15384047.2 |
| positive Regulation: PIK3R3 --> chemosensitivity  | 29370570 | 10.1080/15384047.2 |
| positive Regulation: PIK3R3 --> chemosensitivity  | 29370570 | 10.1080/15384047.2 |
| positive Regulation: PIK3R3 --> chemosensitivity  | 29370570 | 10.1080/15384047.2 |
| positive Regulation: PIK3R3 --> chemosensitivity  | 29370570 | 10.1080/15384047.2 |
| positive Regulation: MIR217 --> chemosensitivity  | 29401684 | 10.3390/ijms190204 |
| positive Regulation: MIR217 --> chemosensitivity  | 28599501 | 10.3892/ol.2017.60 |
| positive Regulation: MIR217 --> chemosensitivity  | 30774364 | 10.2147/OTT.S17661 |

|                                   |                  |          |                    |
|-----------------------------------|------------------|----------|--------------------|
| positive Regulation: MIR217 -->   | chemosensitivity | 34510251 | 10.1007/s00280-021 |
| positive Regulation: MIR217 -->   | chemosensitivity | 35457012 | 10.3390/ijms230841 |
| positive Regulation: MIR217 -->   | chemosensitivity | 35628648 | 10.3390/ijms231058 |
| positive Regulation: MIR221 -->   | chemosensitivity | 29627370 | 10.1016/j.addr.201 |
| positive Regulation: MIR221 -->   | chemosensitivity | 32961483 | 10.1016/j.neo.2020 |
| positive Regulation: MIR221 -->   | chemosensitivity |          | 10.1016/j.biopha.2 |
| positive Regulation: MIR221 -->   | chemosensitivity | 26422796 | 10.1016/j.biopha.2 |
| positive Regulation: MIR221 -->   | chemosensitivity | 26796268 | 10.1016/j.biopha.2 |
| positive Regulation: MIR221 -->   | chemosensitivity | 28350128 | 10.3892/ijo.2017.3 |
| positive Regulation: MIR221 -->   | chemosensitivity | 28887606 | 10.1007/s10616-017 |
| positive Regulation: MIR221 -->   | chemosensitivity |          | 10.1042/BSR2019019 |
| positive Regulation: MIR221 -->   | chemosensitivity |          | 10.1042/BSR2019019 |
| positive Regulation: MIR221 -->   | chemosensitivity | 24899890 | 10.1155/2014/38656 |
| positive Regulation: MIR221 -->   | chemosensitivity | 25308719 |                    |
| positive Regulation: MIR221 -->   | chemosensitivity | 24147037 | 10.1371/journal.po |
| positive Regulation: MIR221 -->   | chemosensitivity | 27501171 | 10.1097/SLA.000000 |
| positive Regulation: MIR221 -->   | chemosensitivity | 32256084 | 10.2147/OTT.S23295 |
| positive Regulation: MIR221 -->   | chemosensitivity |          | 10.1016/j.apsb.202 |
| positive Regulation: DRD1 -->     | chemosensitivity | 35582277 | 10.20517/cdr.2019. |
| positive Regulation: LGALS9 -->   | chemosensitivity | 26717877 | 10.3892/or.2015.44 |
| positive Regulation: CBLB -->     | chemosensitivity | 19508871 | 10.1016/j.febslet. |
| positive Regulation: CBLB -->     | chemosensitivity | 19508871 | 10.1016/j.febslet. |
| positive Regulation: CBLB -->     | chemosensitivity | 29416005 | 10.1038/s41419-017 |
| positive Regulation: CBLB -->     | chemosensitivity | 24351824 | 10.3390/ijms141224 |
| positive Regulation: CBLB -->     | chemosensitivity | 24351824 | 10.3390/ijms141224 |
| positive Regulation: CBLB -->     | chemosensitivity | 24351824 | 10.3390/ijms141224 |
| positive Regulation: CBLB -->     | chemosensitivity | 24351824 | 10.3390/ijms141224 |
| positive Regulation: CBLB -->     | chemosensitivity | 24351824 | 10.3390/ijms141224 |
| positive Regulation: SFRP4 -->    | chemosensitivity | 28534940 | 10.3892/ijo.2017.4 |
| positive Regulation: SFRP4 -->    | chemosensitivity | 23039795 | 10.1186/1471-2121- |
| positive Regulation: SFRP4 -->    | chemosensitivity | 23039795 | 10.1186/1471-2121- |
| positive Regulation: C2orf92 -->  | chemosensitivity | 31865363 | 10.12659/MSM.91682 |
| positive Regulation: C2orf92 -->  | chemosensitivity | 31865363 | 10.12659/MSM.91682 |
| positive Regulation: C2orf92 -->  | chemosensitivity | 31865363 | 10.12659/MSM.91682 |
| positive Regulation: C2orf92 -->  | chemosensitivity | 31865363 | 10.12659/MSM.91682 |
| positive Regulation: MIR509-3 --> | chemosensitivity | 33790078 | 10.1248/CPB.C20-00 |
| positive Regulation: MIR509-3 --> | chemosensitivity | 33790078 | 10.1248/CPB.C20-00 |
| positive Regulation: MIR509-3 --> | chemosensitivity | 33790078 | 10.1248/CPB.C20-00 |
| positive Regulation: MIR509-3 --> | chemosensitivity | 33790078 | 10.1248/CPB.C20-00 |
| positive Regulation: MIR509-3 --> | chemosensitivity | 33790078 | 10.1248/cpb.c20-00 |
| positive Regulation: PAWR -->     | chemosensitivity | 24164776 | 10.1186/bcr3562    |
| positive Regulation: ABCB9 -->    | chemosensitivity | 30400960 | 10.1186/s13046-018 |
| positive Regulation: ABCB9 -->    | chemosensitivity | 30400960 | 10.1186/s13046-018 |
| positive Regulation: TFF3 -->     | chemosensitivity | 15769482 | 10.1016/j.lfs.2004 |
| positive Regulation: TFF3 -->     | chemosensitivity | 15769482 | 10.1016/j.lfs.2004 |
| positive Regulation: MIR3609 -->  | chemosensitivity | 34440380 | 10.3390/genes12081 |
| positive Regulation: MIR212 -->   | chemosensitivity | 32427088 | 10.2174/1871530320 |
| positive Regulation: KAT2B -->    | chemosensitivity | 31042625 | 10.1016/j.neo.2019 |
| positive Regulation: MIR129-2 --> | chemosensitivity | 35146917 | 10.1111/1759-7714. |
| positive Regulation: MIR129-2 --> | chemosensitivity | 35146917 | 10.1111/1759-7714. |
| positive Regulation: MIR7-1 -->   | chemosensitivity | 29421518 | 10.1016/j.cbi.2018 |
| positive Regulation: MIR7-1 -->   | chemosensitivity | 33152930 | 10.1016/j.biopha.2 |
| positive Regulation: MIR7-1 -->   | chemosensitivity | 33497805 | 10.1016/j.phrs.202 |
| positive Regulation: MIR7-1 -->   | chemosensitivity | 23206698 | 10.1016/j.bbrc.201 |

|                                   |                  |          |                    |
|-----------------------------------|------------------|----------|--------------------|
| positive Regulation: MIR7-1 -->   | chemosensitivity | 28618418 | 10.1159/000477884  |
| positive Regulation: MIR7-1 -->   | chemosensitivity | 28618418 | 10.1159/000477884  |
| positive Regulation: MIR7-1 -->   | chemosensitivity | 34400888 | 10.7150/IJMS.62219 |
| positive Regulation: IL24 -->     | chemosensitivity | 28228085 | 10.2174/1568009617 |
| positive Regulation: IL24 -->     | chemosensitivity | 33894112 | 10.1515/hsz-2020-0 |
| positive Regulation: IL24 -->     | chemosensitivity | 33894112 | 10.1515/hsz-2020-0 |
| positive Regulation: IL24 -->     | chemosensitivity | 23783436 | 10.3892/or.2013.25 |
| positive Regulation: IL24 -->     | chemosensitivity | 23982423 | 10.3892/or.2013.26 |
| positive Regulation: IL24 -->     | chemosensitivity | 23982423 | 10.3892/or.2013.26 |
| positive Regulation: IL24 -->     | chemosensitivity | 23982423 | 10.3892/or.2013.26 |
| positive Regulation: IL24 -->     | chemosensitivity | 25778843 | 10.3892/or.2015.38 |
| positive Regulation: IL24 -->     | chemosensitivity | 26168134 | 10.3727/096504015X |
| positive Regulation: IL24 -->     | chemosensitivity | 21553494 |                    |
| positive Regulation: IL24 -->     | chemosensitivity | 23982423 | 10.3892/or.2013.26 |
| positive Regulation: IL24 -->     | chemosensitivity | 23982423 | 10.3892/or.2013.26 |
| positive Regulation: IL24 -->     | chemosensitivity | 23982423 | 10.3892/or.2013.26 |
| positive Regulation: IL24 -->     | chemosensitivity | 25778843 | 10.3892/or.2015.38 |
| positive Regulation: IL24 -->     | chemosensitivity | 26168134 | 10.3727/096504015X |
| positive Regulation: IL24 -->     | chemosensitivity | 35008495 | 10.3390/ijms230100 |
| positive Regulation: MIR193A -->  | chemosensitivity | 26743123 | 10.1016/j.gene.201 |
| positive Regulation: MIR193A -->  | chemosensitivity | 21293058 |                    |
| positive Regulation: MIR193A -->  | chemosensitivity | 21293058 |                    |
| positive Regulation: MIR193A -->  | chemosensitivity | 29848678 | 10.21873/anticanre |
| positive Regulation: MIR193A -->  | chemosensitivity | 30531834 | 10.1038/s41388-018 |
| positive Regulation: MIR193A -->  | chemosensitivity | 32323741 | 10.3892/ijmm.2020. |
| positive Regulation: MIR193A -->  | chemosensitivity | 32209033 | 10.2174/1566524020 |
| positive Regulation: MIR193A -->  | chemosensitivity | 21293058 | 10.1172/JCI43897   |
| positive Regulation: MIR193A -->  | chemosensitivity | 25964554 |                    |
| positive Regulation: MIR193A -->  | chemosensitivity | 26488287 | 10.1159/000439102  |
| positive Regulation: MIR193A -->  | chemosensitivity | 29216925 | 10.1186/s13046-017 |
| positive Regulation: MIR370 -->   | chemosensitivity | 31589963 | 10.1016/j.gene.201 |
| positive Regulation: MIR370 -->   | chemosensitivity | 25063739 | 10.1016/j.canlet.2 |
| positive Regulation: MIR370 -->   | chemosensitivity | 30576245 | 10.1152/ajpendo.00 |
| positive Regulation: MIR370 -->   | chemosensitivity | 32052578 | 10.15252/embr.2019 |
| positive Regulation: MIR370 -->   | chemosensitivity | 30712191 | 10.1007/s12253-019 |
| positive Regulation: MIR370 -->   | chemosensitivity | 25063739 | 10.1016/j.canlet.2 |
| positive Regulation: MIR370 -->   | chemosensitivity | 25063739 | 10.1016/j.canlet.2 |
| positive Regulation: MIR370 -->   | chemosensitivity | 29242506 | 10.1038/s41408-017 |
| positive Regulation: CNOT3 -->    | chemosensitivity | 31177396 | 10.1007/s10495-019 |
| positive Regulation: BTG2 -->     | chemosensitivity | 27932314 | 10.1016/j.cellsig. |
| positive Regulation: MIR219A1 --> | chemosensitivity | 33348804 | 10.3390/ijms212496 |
| positive Regulation: MIR219A1 --> | chemosensitivity | 28884131 | 10.1155/2017/90325 |
| positive Regulation: USP17L2 -->  | chemosensitivity | 35383144 | 10.1038/s41420-022 |
| positive Regulation: INS -->      | chemosensitivity | 36459572 | 10.1113/EP090584   |
| positive Regulation: MIR423 -->   | chemosensitivity | 31424364 | 10.2174/1389200220 |
| positive Regulation: SUFU -->     | chemosensitivity | 27810403 | 10.1016/j.canlet.2 |
| positive Regulation: FZD5 -->     | chemosensitivity | 33311446 | 10.1038/s41419-020 |
| positive Regulation: MIR5195 -->  | chemosensitivity | 31308851 | 10.1186/s11658-019 |
| positive Regulation: CCL3 -->     | chemosensitivity | 35613826 | 10.1136/jitc-2021- |
| positive Regulation: CCL3 -->     | chemosensitivity | 35613826 | 10.1136/jitc-2021- |
| positive Regulation: CCL3 -->     | chemosensitivity | 35613826 | 10.1136/jitc-2021- |
| positive Regulation: MARCKS -->   | chemosensitivity | 32056006 | 10.1007/s00432-020 |
| positive Regulation: MARCKS -->   | chemosensitivity | 32112147 | 10.1007/s00432-020 |
| positive Regulation: MARCKS -->   | chemosensitivity | 32112147 | 10.1007/s00432-020 |



|                                   |                  |          |                    |
|-----------------------------------|------------------|----------|--------------------|
| positive Regulation: MIR211 -->   | chemosensitivity | 31235732 | 10.1038/s41419-019 |
| positive Regulation: MIR211 -->   | chemosensitivity | 33223523 | 10.1038/s41417-020 |
| positive Regulation: MIR211 -->   | chemosensitivity | 23966157 | 10.4161/cc.25950   |
| positive Regulation: MIR211 -->   | chemosensitivity | 26035292 | 10.3892/ijo.2015.3 |
| positive Regulation: MIR211 -->   | chemosensitivity | 23183822 | 10.18632/oncotarge |
| positive Regulation: MIR211 -->   | chemosensitivity | 31235732 | 10.1038/s41419-019 |
| positive Regulation: MIR211 -->   | chemosensitivity | 31235732 | 10.1038/s41419-019 |
| positive Regulation: MIR211 -->   | chemosensitivity | 33494674 | 10.2174/1389450122 |
| positive Regulation: NDUFA13 -->  | chemosensitivity | 30032449 | 10.1007/s00280-018 |
| positive Regulation: NDUFA13 -->  | chemosensitivity | 30032449 | 10.1007/s00280-018 |
| positive Regulation: MIR494 -->   | chemosensitivity | 33892053 | 10.1016/j.bbcan.20 |
| positive Regulation: MIR494 -->   | chemosensitivity |          | 10.14715/cmb/2017. |
| positive Regulation: MIR494 -->   | chemosensitivity |          | 10.14715/cmb/2017. |
| positive Regulation: MIR494 -->   | chemosensitivity |          | 10.14715/cmb/2017. |
| positive Regulation: MIR494 -->   | chemosensitivity |          | 10.14715/cmb/2017. |
| positive Regulation: MIR494 -->   | chemosensitivity |          | 10.14715/cmb/2017. |
| positive Regulation: MIR494 -->   | chemosensitivity |          | 10.14715/cmb/2017. |
| positive Regulation: MIR494 -->   | chemosensitivity | 30672438 |                    |
| positive Regulation: MIR494 -->   | chemosensitivity | 30672438 |                    |
| positive Regulation: ADARB1 -->   | chemosensitivity | 32052578 | 10.15252/embr.2019 |
| positive Regulation: DFFB -->     | chemosensitivity | 14969818 | 10.1016/j.oralonco |
| positive Regulation: MIR1268B --> | chemosensitivity | 29567542 | 10.1016/j.biopha.2 |
| positive Regulation: MIR1268B --> | chemosensitivity | 31136284 | 10.1161/STROKEAHA. |
| positive Regulation: MIR1268B --> | chemosensitivity | 29163776 | 10.18632/oncotarge |
| positive Regulation: MIR1268B --> | chemosensitivity | 29163776 | 10.18632/oncotarge |
| positive Regulation: MIR138-1 --> | chemosensitivity | 27622325 | 10.1016/j.bbrc.201 |
| positive Regulation: MIR138-1 --> | chemosensitivity | 28922711 | 10.1016/j.biopha.2 |
| positive Regulation: MIR138-1 --> | chemosensitivity | 33360300 | 10.1016/j.tranon.2 |
| positive Regulation: MIR138-1 --> | chemosensitivity | 30594069 | 10.1016/j.omtn.201 |
| positive Regulation: MIR138-1 --> | chemosensitivity | 28378633 | 10.1177/1010428317 |
| positive Regulation: MIR138-1 --> | chemosensitivity | 28378633 | 10.1177/1010428317 |
| positive Regulation: MIR138-1 --> | chemosensitivity | 28378633 | 10.1177/1010428317 |
| positive Regulation: MIR138-1 --> | chemosensitivity | 29328459 | 10.3892/or.2018.61 |
| positive Regulation: MIR138-1 --> | chemosensitivity | 29328459 | 10.3892/or.2018.61 |
| positive Regulation: MIR138-1 --> | chemosensitivity | 32349783 | 10.1186/s40659-020 |
| positive Regulation: MIR138-1 --> | chemosensitivity | 32349783 | 10.1186/s40659-020 |
| positive Regulation: MIR138-1 --> | chemosensitivity | 32349783 | 10.1186/s40659-020 |
| positive Regulation: MIR138-1 --> | chemosensitivity | 25190487 | 10.3892/or.2014.34 |
| positive Regulation: MIR138-1 --> | chemosensitivity | 25190487 | 10.3892/or.2014.34 |
| positive Regulation: MIR138-1 --> | chemosensitivity | 27019355 | 10.1371/journal.po |
| positive Regulation: MIR138-1 --> | chemosensitivity | 27019355 | 10.1371/journal.po |
| positive Regulation: MIR138-1 --> | chemosensitivity | 27019355 | 10.1371/journal.po |
| positive Regulation: MIR138-1 --> | chemosensitivity | 27019355 | 10.1371/journal.po |
| positive Regulation: MIR138-1 --> | chemosensitivity | 26631041 | 10.1007/s13277-015 |
| positive Regulation: MIR138-1 --> | chemosensitivity | 25571061 | 10.1109/EMBC.2014. |
| positive Regulation: MIR138-1 --> | chemosensitivity | 26631041 | 10.1007/s13277-015 |
| positive Regulation: MIR138-1 --> | chemosensitivity | 27019355 | 10.1371/journal.po |
| positive Regulation: MIR138-1 --> | chemosensitivity | 31853324 | 10.3892/etm.2019.8 |
| positive Regulation: MIR138-1 --> | chemosensitivity | 32349783 | 10.1186/s40659-020 |
| positive Regulation: MIR138-1 --> | chemosensitivity | 34440380 | 10.3390/genes12081 |
| positive Regulation: AQP9 -->     | chemosensitivity | 28640255 | 10.1038/cddis.2017 |
| positive Regulation: AQP9 -->     | chemosensitivity | 28640255 | 10.1038/cddis.2017 |
| positive Regulation: RAB37 -->    | chemosensitivity | 32858472 | 10.1016/j.ejmech.2 |

|                                                    |          |                    |
|----------------------------------------------------|----------|--------------------|
| positive Regulation: RAB37 --> chemosensitivity    | 33824475 | 10.1038/s41388-021 |
| positive Regulation: RAB37 --> chemosensitivity    | 30131385 | 10.1158/1078-0432. |
| positive Regulation: MIR218-1 --> chemosensitivity | 32681832 | 10.1016/j.abb.2020 |
| positive Regulation: MIR218-1 --> chemosensitivity | 30921705 | 10.1016/j.biopha.2 |
| positive Regulation: MIR218-1 --> chemosensitivity | 32711289 | 10.1016/j.oralonco |
| positive Regulation: MIR218-1 --> chemosensitivity | 32711289 | 10.1016/j.oralonco |
| positive Regulation: MIR218-1 --> chemosensitivity | 33965650 | 10.1016/j.jogoh.20 |
| positive Regulation: MIR218-1 --> chemosensitivity | 25857406 | 10.1016/j.yexcr.20 |
| positive Regulation: MIR218-1 --> chemosensitivity | 25857406 | 10.1016/j.yexcr.20 |
| positive Regulation: MIR218-1 --> chemosensitivity | 25857406 | 10.1016/j.yexcr.20 |
| positive Regulation: MIR218-1 --> chemosensitivity | 26662432 | 10.4238/2015.Decem |
| positive Regulation: MIR218-1 --> chemosensitivity | 27415661 | 10.1159/000445653  |
| positive Regulation: MIR218-1 --> chemosensitivity | 28222430 | 10.1159/000460505  |
| positive Regulation: MIR218-1 --> chemosensitivity | 28222430 | 10.1159/000460505  |
| positive Regulation: MIR218-1 --> chemosensitivity | 28222430 | 10.1159/000460505  |
| positive Regulation: MIR218-1 --> chemosensitivity | 28492560 | 10.1038/cddis.2017 |
| positive Regulation: MIR218-1 --> chemosensitivity | 28192397 | 10.1038/onc.2016.4 |
| positive Regulation: MIR218-1 --> chemosensitivity | 28192397 | 10.1038/onc.2016.4 |
| positive Regulation: MIR218-1 --> chemosensitivity | 28631568 | 10.1177/1010428317 |
| positive Regulation: MIR218-1 --> chemosensitivity | 30293085 | 10.12659/MSM.91029 |
| positive Regulation: MIR218-1 --> chemosensitivity | 31257509 | 10.3892/mmr.2019.1 |
| positive Regulation: MIR218-1 --> chemosensitivity | 32869841 | 10.1042/BSR2019450 |
| positive Regulation: MIR218-1 --> chemosensitivity | 23443110 | 10.3390/ijms131216 |
| positive Regulation: MIR218-1 --> chemosensitivity | 23443110 | 10.3390/ijms131216 |
| positive Regulation: MIR218-1 --> chemosensitivity | 23443110 | 10.3390/ijms131216 |
| positive Regulation: MIR218-1 --> chemosensitivity | 23443110 | 10.3390/ijms131216 |
| positive Regulation: MIR218-1 --> chemosensitivity | 23443110 | 10.3390/ijms131216 |
| positive Regulation: MIR218-1 --> chemosensitivity | 23443110 | 10.3390/ijms131216 |
| positive Regulation: MIR218-1 --> chemosensitivity | 24705471 | 10.1371/journal.po |
| positive Regulation: MIR218-1 --> chemosensitivity | 25482044 | 10.3892/or.2014.36 |
| positive Regulation: MIR218-1 --> chemosensitivity | 25482044 | 10.3892/or.2014.36 |
| positive Regulation: MIR218-1 --> chemosensitivity | 25482044 | 10.3892/or.2014.36 |
| positive Regulation: MIR218-1 --> chemosensitivity | 25482044 | 10.3892/or.2014.36 |
| positive Regulation: MIR218-1 --> chemosensitivity | 25482044 | 10.3892/or.2014.36 |
| positive Regulation: MIR218-1 --> chemosensitivity | 25482044 | 10.3892/or.2014.36 |
| positive Regulation: MIR218-1 --> chemosensitivity | 25132800 |                    |
| positive Regulation: MIR218-1 --> chemosensitivity | 26282001 | 10.1007/s13277-015 |
| positive Regulation: MIR218-1 --> chemosensitivity | 26282001 | 10.1007/s13277-015 |
| positive Regulation: MIR218-1 --> chemosensitivity | 26282001 | 10.1007/s13277-015 |
| positive Regulation: MIR218-1 --> chemosensitivity | 26282001 | 10.1007/s13277-015 |
| positive Regulation: MIR218-1 --> chemosensitivity | 26282001 | 10.1007/s13277-015 |
| positive Regulation: MIR218-1 --> chemosensitivity | 26282001 | 10.1007/s13277-015 |
| positive Regulation: MIR218-1 --> chemosensitivity | 23443110 | 10.3390/ijms131216 |
| positive Regulation: MIR218-1 --> chemosensitivity | 23443110 | 10.3390/ijms131216 |
| positive Regulation: MIR218-1 --> chemosensitivity | 25170221 | 10.3748/wjg.v20.i3 |
| positive Regulation: MIR218-1 --> chemosensitivity | 25394901 | 10.1007/s13277-014 |
| positive Regulation: MIR218-1 --> chemosensitivity | 25482044 | 10.3892/or.2014.36 |
| positive Regulation: MIR218-1 --> chemosensitivity | 26282001 | 10.1007/s13277-015 |
| positive Regulation: MIR218-1 --> chemosensitivity | 26442524 | 10.1093/carcin/bgv |
| positive Regulation: MIR218-1 --> chemosensitivity | 28052414 | 10.1002/mc.2261210 |
| positive Regulation: MIR218-1 --> chemosensitivity | 28192397 | 10.1038/onc.2016.4 |
| positive Regulation: MIR218-1 --> chemosensitivity | 28222430 | 10.1159/0004605051 |
| positive Regulation: MIR218-1 --> chemosensitivity | 28222430 | 10.1159/0004605051 |
| positive Regulation: MIR218-1 --> chemosensitivity | 34453645 | 10.1007/s11010-021 |

|                                   |                  |          |                    |
|-----------------------------------|------------------|----------|--------------------|
| positive Regulation: MIR218-1 --> | chemosensitivity | 35005988 | 10.1089/dna.2021.0 |
| positive Regulation: MIR218-1 --> | chemosensitivity |          | 10.32604/biocell.2 |
| positive Regulation: MIR379 -->   | chemosensitivity | 33892053 | 10.1016/j.bbcan.20 |
| positive Regulation: MIR379 -->   | chemosensitivity | 28051262 |                    |
| positive Regulation: MIR379 -->   | chemosensitivity | 29286115 | 10.3892/mmr.2017.8 |
| positive Regulation: MIR379 -->   | chemosensitivity | 33173959 | 10.3892/mmr.2020.1 |
| positive Regulation: CLDN7 -->    | chemosensitivity | 24009024 | 10.3390/ijms140918 |
| positive Regulation: LYVE1 -->    | chemosensitivity | 23743354 | 10.1016/j.canlet.2 |
| positive Regulation: FUBP1 -->    | chemosensitivity | 28667493 | 10.1007/s12253-017 |
| positive Regulation: CHL1 -->     | chemosensitivity | 32863924 | 10.3892/ol.2020.11 |
| positive Regulation: MIR26A1 -->  | chemosensitivity | 30898716 | 10.1016/j.gene.201 |
| positive Regulation: MIR26A1 -->  | chemosensitivity | 29518611 | 10.1016/j.biopha.2 |
| positive Regulation: MIR26A1 -->  | chemosensitivity | 28614291 | 10.12659/MSM.90417 |
| positive Regulation: MIR26A1 -->  | chemosensitivity | 28898169 | 10.1080/15384101.2 |
| positive Regulation: MIR26A1 -->  | chemosensitivity | 28079894 | 10.1038/cddis.2016 |
| positive Regulation: MIR26A1 -->  | chemosensitivity | 30425242 | 10.1038/s41419-018 |
| positive Regulation: MIR26A1 -->  | chemosensitivity | 30425242 | 10.1038/s41419-018 |
| positive Regulation: MIR26A1 -->  | chemosensitivity | 26398882 | 10.3892/or.2015.42 |
| positive Regulation: MIR26A1 -->  | chemosensitivity | 28079894 | 10.1038/cddis.2016 |
| positive Regulation: MIR26A1 -->  | chemosensitivity | 34639131 | 10.3390/ijms221910 |
| positive Regulation: MIR26A1 -->  | chemosensitivity | 34510251 | 10.1007/s00280-021 |
| positive Regulation: S100A16 -->  | chemosensitivity | 31894756 | 10.12659/MSM.91975 |
| positive Regulation: S100A16 -->  | chemosensitivity | 30916375 | 10.1111/bjh.158781 |
| positive Regulation: MIR133B -->  | chemosensitivity | 30653948 | 10.1016/j.clinbioc |
| positive Regulation: MIR133B -->  | chemosensitivity | 29328427 | 10.3892/ijmm.2018. |
| positive Regulation: MIR133B -->  | chemosensitivity | 29328427 | 10.3892/ijmm.2018. |
| positive Regulation: MIR133B -->  | chemosensitivity | 29327946 | 10.1089/dna.2017.3 |
| positive Regulation: MIR133B -->  | chemosensitivity | 28881788 | 10.18632/oncotarge |
| positive Regulation: MIR133B -->  | chemosensitivity | 28881788 | 10.18632/oncotarge |
| positive Regulation: MIR133B -->  | chemosensitivity | 30317571 | 10.1002/jcp.272881 |
| positive Regulation: MIR133B -->  | chemosensitivity | 35086110 | 10.1159/000521493  |
| positive Regulation: MIR487B -->  | chemosensitivity | 33125503 | 10.3892/or.2020.78 |
| positive Regulation: MIR487B -->  | chemosensitivity | 33390839 | 10.7150/ijbs.50773 |
| positive Regulation: LIN28A -->   | chemosensitivity | 26687759 | 10.1007/s13277-015 |
| positive Regulation: LIN28A -->   | chemosensitivity | 26687759 | 10.1007/s13277-015 |
| positive Regulation: LIN28A -->   | chemosensitivity | 26687759 | 10.1007/s13277-015 |
| positive Regulation: LIN28A -->   | chemosensitivity | 26687759 | 10.1007/s13277-015 |
| positive Regulation: LIN28A -->   | chemosensitivity | 26687759 | 10.1007/s13277-015 |
| positive Regulation: LIN28A -->   | chemosensitivity | 22808086 | 10.1371/journal.po |
| positive Regulation: LIN28A -->   | chemosensitivity | 23335963 | 10.1371/journal.po |
| positive Regulation: LIN28A -->   | chemosensitivity | 26123544 | 10.1186/s12943-015 |
| positive Regulation: LIN28A -->   | chemosensitivity | 26687759 | 10.1007/s13277-015 |
| positive Regulation: MIR148B -->  | chemosensitivity | 26554910 | 10.1016/j.jgg.2015 |
| positive Regulation: MIR148B -->  | chemosensitivity | 33831655 | 10.1016/j.tranon.2 |
| positive Regulation: MIR148B -->  | chemosensitivity | 25997710 | 10.1042/BSR2015008 |
| positive Regulation: MIR148B -->  | chemosensitivity | 25997710 | 10.1042/BSR2015008 |
| positive Regulation: MIR148B -->  | chemosensitivity | 25997710 | 10.1042/BSR2015008 |
| positive Regulation: MIR148B -->  | chemosensitivity | 23171948 | 10.1158/1535-7163. |
| positive Regulation: MIR148B -->  | chemosensitivity | 23171948 | 10.1158/1535-7163. |
| positive Regulation: MIR148B -->  | chemosensitivity | 25997710 | 10.1042/BSR2015008 |
| positive Regulation: MIR148B -->  | chemosensitivity | 33423167 | 10.1007/s13402-020 |
| positive Regulation: MIR148B -->  | chemosensitivity | 34283401 | 10.1007/s13402-021 |
| positive Regulation: MIR148B -->  | chemosensitivity | 34473617 | 10.2174/1566524021 |



|                                                   |          |                     |
|---------------------------------------------------|----------|---------------------|
| positive Regulation: PBK --> chemosensitivity     | 28373071 | 10.1016/j.bbrc.201  |
| positive Regulation: PBK --> chemosensitivity     | 30778048 | 10.1038/s41419-019  |
| positive Regulation: PBK --> chemosensitivity     | 28373071 | 10.1016/j.bbrc.201  |
| positive Regulation: MIR433 --> chemosensitivity  | 29495532 | 10.3390/ijms190306  |
| positive Regulation: MIR433 --> chemosensitivity  |          |                     |
| positive Regulation: MIR433 --> chemosensitivity  | 33485372 | 10.1186/s13048-020  |
| positive Regulation: MIR433 --> chemosensitivity  | 27926502 | 10.18632/oncotarge  |
| positive Regulation: MIR433 --> chemosensitivity  | 27926502 | 10.18632/oncotarge  |
| positive Regulation: MIR433 --> chemosensitivity  |          | 10.1007/s12038-021  |
| positive Regulation: MIR433 --> chemosensitivity  | 36303447 | 10.1002/brb3.2632   |
| positive Regulation: TACC1 --> chemosensitivity   | 23354013 | 10.3892/or.2013.22  |
| positive Regulation: NEFL --> chemosensitivity    | 26879754 | 10.1007/s10571-016  |
| positive Regulation: NEFL --> chemosensitivity    | 31057612 | 10.1155/2019/35181  |
| positive Regulation: TRIM72 --> chemosensitivity  | 35858925 | 10.1038/s41389-022  |
| positive Regulation: WARS1 --> chemosensitivity   | 33408886 | 10.4048/jbc.2020.2  |
| positive Regulation: C4BPA --> chemosensitivity   | 34167573 | 10.1186/s13046-021  |
| positive Regulation: C4BPA --> chemosensitivity   | 34167573 | 10.1186/s13046-021  |
| positive Regulation: MIR139 --> chemosensitivity  | 30336197 | 10.1016/j.canlet.2  |
| positive Regulation: MIR139 --> chemosensitivity  | 26299922 | 10.1016/j.bbrc.201  |
| positive Regulation: MIR139 --> chemosensitivity  | 27173050 | 10.1016/j.prp.2016  |
| positive Regulation: MIR139 --> chemosensitivity  | 28713954 | 10.3892/mmr.2017.6  |
| positive Regulation: MIR139 --> chemosensitivity  | 28095367 | 10.1515/hsz-2016-0  |
| positive Regulation: MIR139 --> chemosensitivity  | 29594361 | 10.1007/s00280-018  |
| positive Regulation: MIR139 --> chemosensitivity  | 29719173 | 10.1152/ajpcell.00  |
| positive Regulation: MIR139 --> chemosensitivity  | 30439707 | 10.1159/000495169   |
| positive Regulation: MIR139 --> chemosensitivity  | 35212928 | 10.1007/s11033-022  |
| positive Regulation: ID3 --> chemosensitivity     | 30008847 | 10.3892/ol.2018.88  |
| positive Regulation: MIR30A --> chemosensitivity  | 33892053 | 10.1016/j.bbcan.20  |
| positive Regulation: MIR30A --> chemosensitivity  | 30249919 | 10.2176/nmc.ra.201  |
| positive Regulation: MIR30A --> chemosensitivity  | 31638211 | 10.3892/i.jo.2019.4 |
| positive Regulation: MIR30A --> chemosensitivity  | 33097691 | 10.1038/s41419-020  |
| positive Regulation: MIR30A --> chemosensitivity  | 29375703 | 10.3892/etm.2017.5  |
| positive Regulation: MIR30A --> chemosensitivity  | 29805498 | 10.3892/etm.2018.6  |
| positive Regulation: MIR30A --> chemosensitivity  | 29805498 | 10.3892/etm.2018.6  |
| positive Regulation: MIR30A --> chemosensitivity  | 31602254 | 10.7150/jca.311911  |
| positive Regulation: MIR30A --> chemosensitivity  | 35449123 | 10.1038/s41419-022  |
| positive Regulation: MIR30A --> chemosensitivity  | 35449123 | 10.1038/s41419-022  |
| positive Regulation: MIR30A --> chemosensitivity  | 35449123 | 10.1038/s41419-022  |
| positive Regulation: KRT10 --> chemosensitivity   | 24434152 | 10.1016/j.bbrc.201  |
| positive Regulation: KRT10 --> chemosensitivity   | 24434152 | 10.1016/j.bbrc.201  |
| positive Regulation: KRT10 --> chemosensitivity   | 24434152 | 10.1016/j.bbrc.201  |
| positive Regulation: HDAC1 --> chemosensitivity   | 33539818 | 10.1016/j.ejphar.2  |
| positive Regulation: HDAC1 --> chemosensitivity   | 33539818 | 10.1016/j.ejphar.2  |
| positive Regulation: HDAC1 --> chemosensitivity   | 30500418 | 10.1016/j.humphath. |
| positive Regulation: HDAC1 --> chemosensitivity   | 30071534 | 10.1159/000492260   |
| positive Regulation: HDAC1 --> chemosensitivity   | 30071534 | 10.1159/000492260   |
| positive Regulation: HDAC1 --> chemosensitivity   | 30071534 | 10.1159/000492260   |
| positive Regulation: HDAC1 --> chemosensitivity   | 30071534 | 10.1159/000492260   |
| positive Regulation: HDAC1 --> chemosensitivity   | 30168013 | 10.1007/s10637-018  |
| positive Regulation: HDAC1 --> chemosensitivity   | 30071534 | 10.1159/0004922601  |
| positive Regulation: EGF --> chemosensitivity     | 23554613 | 10.1016/S1674-8301  |
| positive Regulation: EGF --> chemosensitivity     | 23554613 | 10.1016/S1674-8301  |
| positive Regulation: EGF --> chemosensitivity     | 24761873 | 10.7314/apjcp.2014  |
| positive Regulation: MIR125A --> chemosensitivity | 28088556 | 10.1016/j.urology.  |

|                                    |                  |          |                    |
|------------------------------------|------------------|----------|--------------------|
| positive Regulation: MIR125A -->   | chemosensitivity | 29990840 | 10.1016/j.biopha.2 |
| positive Regulation: MIR125A -->   | chemosensitivity | 29990840 | 10.1016/j.biopha.2 |
| positive Regulation: MIR125A -->   | chemosensitivity | 33152930 | 10.1016/j.biopha.2 |
| positive Regulation: MIR125A -->   | chemosensitivity | 32497683 | 10.1016/j.semcance |
| positive Regulation: MIR125A -->   | chemosensitivity | 28381182 | 10.1177/1010428317 |
| positive Regulation: MIR125A -->   | chemosensitivity | 29739052 | 10.7754/Clin.Lab.2 |
| positive Regulation: MIR125A -->   | chemosensitivity | 29767234 | 10.3892/ijo.2018.4 |
| positive Regulation: MIR125A -->   | chemosensitivity | 29767234 | 10.3892/ijo.2018.4 |
| positive Regulation: MIR125A -->   | chemosensitivity | 29767234 | 10.3892/ijo.2018.4 |
| positive Regulation: MIR125A -->   | chemosensitivity | 30541899 | 10.1042/BSR2018089 |
| positive Regulation: MIR125A -->   | chemosensitivity | 26758190 | 10.1093/abbs/gmv12 |
| positive Regulation: MIR125A -->   | chemosensitivity | 26758190 | 10.1093/abbs/gmv12 |
| positive Regulation: MIR125A -->   | chemosensitivity | 29990840 | 10.1016/j.biopha.2 |
| positive Regulation: MIR125A -->   | chemosensitivity | 29990840 | 10.1016/j.biopha.2 |
| positive Regulation: MIR125A -->   | chemosensitivity | 29990840 | 10.1016/j.biopha.2 |
| positive Regulation: MIR125A -->   | chemosensitivity |          | 10.1016/j.semcance |
| positive Regulation: MOAP1 -->     | chemosensitivity | 27003254 | 10.1016/j.bbrc.201 |
| positive Regulation: MOAP1 -->     | chemosensitivity | 27003254 | 10.1016/j.bbrc.201 |
| positive Regulation: MOAP1 -->     | chemosensitivity | 27424190 | 10.1007/s00432-016 |
| positive Regulation: MOAP1 -->     | chemosensitivity | 27424190 | 10.1007/s00432-016 |
| positive Regulation: MOAP1 -->     | chemosensitivity | 27424190 | 10.1007/s00432-016 |
| positive Regulation: MOAP1 -->     | chemosensitivity | 27424190 | 10.1007/s00432-016 |
| positive Regulation: DACT1 -->     | chemosensitivity | 29037126 | 10.1177/1010428317 |
| positive Regulation: DACT1 -->     | chemosensitivity | 29037126 | 10.1177/1010428317 |
| positive Regulation: DACT1 -->     | chemosensitivity | 29037126 | 10.1177/1010428317 |
| positive Regulation: MIR539 -->    | chemosensitivity | 30119173 | 10.1016/j.biopha.2 |
| positive Regulation: MIR539 -->    | chemosensitivity | 30119173 | 10.1016/j.biopha.2 |
| positive Regulation: MIR539 -->    | chemosensitivity | 33352449 | 10.1016/j.biopha.2 |
| positive Regulation: MIR539 -->    | chemosensitivity | 31432162 | 10.3892/mmr.2019.1 |
| positive Regulation: MIR539 -->    | chemosensitivity | 31432162 | 10.3892/mmr.2019.1 |
| positive Regulation: MIR539 -->    | chemosensitivity | 30119173 | 10.1016/j.biopha.2 |
| positive Regulation: MIR539 -->    | chemosensitivity | 30119173 | 10.1016/j.biopha.2 |
| positive Regulation: MIR539 -->    | chemosensitivity | 36271518 | 10.1016/j.biopha.2 |
| positive Regulation: IRF4 -->      | chemosensitivity | 22888789 | 10.1186/1476-4598- |
| positive Regulation: PHLDA2 -->    | chemosensitivity | 31638211 | 10.3892/ijo.2019.4 |
| positive Regulation: SDCBP -->     | chemosensitivity | 32595209 | 10.1038/s41416-020 |
| positive Regulation: MIRLET7A3 --> | chemosensitivity | 23335963 | 10.1371/journal.po |
| positive Regulation: MIR128-1 -->  | chemosensitivity | 31474314 | 10.1016/j.prp.2019 |
| positive Regulation: MIR128-1 -->  | chemosensitivity | 30551451 | 10.1016/j.biopha.2 |
| positive Regulation: MIR128-1 -->  | chemosensitivity | 33338745 | 10.1016/j.biopha.2 |
| positive Regulation: MIR128-1 -->  | chemosensitivity | 27105614 | 10.1007/s13277-016 |
| positive Regulation: MIR128-1 -->  | chemosensitivity | 30076414 | 10.1038/s41388-018 |
| positive Regulation: MIR128-1 -->  | chemosensitivity | 30601194 | 10.1097/CAD.000000 |
| positive Regulation: MIR128-1 -->  | chemosensitivity | 32016963 | 10.26355/eurrev_20 |
| positive Regulation: MIR128-1 -->  | chemosensitivity | 31721699 | 10.2174/1381612825 |
| positive Regulation: MIR128-1 -->  | chemosensitivity | 33743142 | 10.1007/s12013-021 |
| positive Regulation: MIR128-1 -->  | chemosensitivity | 23526655 | 10.1002/cbin.10100 |
| positive Regulation: MIR128-1 -->  | chemosensitivity | 25017996 | 10.3892/or.2014.33 |
| positive Regulation: MIR128-1 -->  | chemosensitivity | 25921099 | 10.1093/jjco/hyv02 |
| positive Regulation: MIR128-1 -->  | chemosensitivity | 28146425 | 10.18632/oncotarge |
| positive Regulation: MIR128-1 -->  | chemosensitivity | 30890168 | 10.1186/s12943-019 |
| positive Regulation: MIR128-1 -->  | chemosensitivity | 32398152 | 10.1186/s12943-020 |
| positive Regulation: MIR128-1 -->  | chemosensitivity | 27415661 | 10.1159/000445653  |
| positive Regulation: MIR128-1 -->  | chemosensitivity | 25017996 | 10.3892/or.2014.33 |

|                                   |                  |          |                    |
|-----------------------------------|------------------|----------|--------------------|
| positive Regulation: MIR128-1 --> | chemosensitivity | 34510546 | 10.1096/fj.2021002 |
| positive Regulation: MIR128-1 --> | chemosensitivity | 34263426 | 10.1007/s12035-021 |
| positive Regulation: MIR128-1 --> | chemosensitivity | 34884646 | 10.3390/ijms222312 |
| positive Regulation: MIR128-1 --> | chemosensitivity |          | 10.3390/ijms230313 |
| positive Regulation: MIR128-1 --> | chemosensitivity | 35563265 | 10.3390/ijms230948 |
| positive Regulation: MIR128-1 --> | chemosensitivity | 35906618 | 10.1186/s12943-022 |
| positive Regulation: MIR128-1 --> | chemosensitivity | 35906618 | 10.1186/s12943-022 |
| positive Regulation: MIR149 -->   | chemosensitivity | 33197838 | 10.1016/j.prp.2020 |
| positive Regulation: MIR149 -->   | chemosensitivity | 33253912 | 10.1016/j.cellsig. |
| positive Regulation: MIR149 -->   | chemosensitivity | 33348804 | 10.3390/ijms212496 |
| positive Regulation: MIR149 -->   | chemosensitivity | 33011952 | 10.1007/s11010-020 |
| positive Regulation: MIR149 -->   | chemosensitivity | 33011952 | 10.1007/s11010-020 |
| positive Regulation: MIR149 -->   | chemosensitivity | 34140005 | 10.1186/s12967-021 |
| positive Regulation: MIR149 -->   | chemosensitivity | 27121091 | 10.3892/mmr.2016.5 |
| positive Regulation: MIR149 -->   | chemosensitivity | 25017996 | 10.3892/or.2014.33 |
| positive Regulation: MIR149 -->   | chemosensitivity | 26223974 | 10.1186/s13048-015 |
| positive Regulation: MIR149 -->   | chemosensitivity | 31889909 | 10.1186/s12935-019 |
| positive Regulation: MIR149 -->   | chemosensitivity | 31889909 | 10.1186/s12935-019 |
| positive Regulation: MIR149 -->   | chemosensitivity | 31889909 | 10.1186/s12935-019 |
| positive Regulation: MIR149 -->   | chemosensitivity | 31933761 |                    |
| positive Regulation: MIR149 -->   | chemosensitivity | 31933761 |                    |
| positive Regulation: MIR149 -->   | chemosensitivity | 33011952 | 10.1007/s11010-020 |
| positive Regulation: MIR149 -->   | chemosensitivity | 27415661 | 10.1159/000445653  |
| positive Regulation: MIR149 -->   | chemosensitivity | 25017996 | 10.3892/or.2014.33 |
| positive Regulation: MIR149 -->   | chemosensitivity |          | 10.3390/molecules2 |
| positive Regulation: MIR149 -->   | chemosensitivity | 35806286 | 10.3390/ijms231372 |
| positive Regulation: MIR149 -->   | chemosensitivity | 36142734 | 10.3390/ijms231810 |
| positive Regulation: MIR148A -->  | chemosensitivity | 20406806 | 10.1074/jbc.M109.0 |
| positive Regulation: MIR148A -->  | chemosensitivity | 20406806 | 10.1074/jbc.M109.0 |
| positive Regulation: MIR148A -->  | chemosensitivity | 30551544 | 10.1016/j.biopha.2 |
| positive Regulation: MIR148A -->  | chemosensitivity | 23383211 | 10.1371/journal.po |
| positive Regulation: MIR148A -->  | chemosensitivity | 35563265 | 10.3390/ijms230948 |
| positive Regulation: BAX -->      | chemosensitivity | 12560233 | 10.1182/blood-2002 |
| positive Regulation: BAX -->      | chemosensitivity | 12175703 | 10.1016/S0024-3205 |
| positive Regulation: BAX -->      | chemosensitivity | 20206383 | 10.1016/j.leukres. |
| positive Regulation: BAX -->      | chemosensitivity | 11479005 | 10.1016/S0165-6147 |
| positive Regulation: BAX -->      | chemosensitivity | 15327837 | 10.1016/j.canlet.2 |
| positive Regulation: BAX -->      | chemosensitivity | 15629598 | 10.1016/j.ijrobp.2 |
| positive Regulation: BAX -->      | chemosensitivity | 19480968 | 10.1016/j.ijrobp.2 |
| positive Regulation: BAX -->      | chemosensitivity | 9793746  | 10.1016/S1040-8428 |
| positive Regulation: BAX -->      | chemosensitivity |          | 10.1016/j.bionut.2 |
| positive Regulation: BAX -->      | chemosensitivity | 23540284 | 10.1016/j.biopha.2 |
| positive Regulation: BAX -->      | chemosensitivity | 23540284 | 10.1016/j.biopha.2 |
| positive Regulation: BAX -->      | chemosensitivity | 14645705 |                    |
| positive Regulation: BAX -->      | chemosensitivity | 9122197  |                    |
| positive Regulation: BAX -->      | chemosensitivity | 9122197  |                    |
| positive Regulation: BAX -->      | chemosensitivity | 10557106 |                    |
| positive Regulation: BAX -->      | chemosensitivity | 24173654 | 10.3892/or.2013.28 |
| positive Regulation: BAX -->      | chemosensitivity | 24637737 | 10.1371/journal.po |
| positive Regulation: BAX -->      | chemosensitivity | 9122197  | 10.1073/pnas.94.6. |
| positive Regulation: BAX -->      | chemosensitivity | 9802058  |                    |
| positive Regulation: BAX -->      | chemosensitivity | 10419903 |                    |
| positive Regulation: BAX -->      | chemosensitivity | 23526655 | 10.1002/cbin.10100 |
| positive Regulation: BAX -->      | chemosensitivity | 11803466 |                    |

|                                                    |          |                    |
|----------------------------------------------------|----------|--------------------|
| positive Regulation: BAX --> chemosensitivity      | 22590594 | 10.1371/journal.po |
| positive Regulation: PIWIL1 --> chemosensitivity   | 25701955 | 10.1007/s12013-015 |
| positive Regulation: MIR1271 --> chemosensitivity  | 36136988 | 10.1097/CAD.000000 |
| positive Regulation: CYTOR --> chemosensitivity    |          |                    |
| positive Regulation: CYTOR --> chemosensitivity    | 29863253 | 10.26355/eurrev_20 |
| positive Regulation: CYTOR --> chemosensitivity    | 31777553 | 10.3892/etm.2019.8 |
| positive Regulation: CYTOR --> chemosensitivity    | 31777553 | 10.3892/etm.2019.8 |
| positive Regulation: CYTOR --> chemosensitivity    | 34558643 | 10.3892/ijo.2021.5 |
| positive Regulation: MSI2 --> chemosensitivity     | 28223335 | 10.1096/fj.2016012 |
| positive Regulation: MSI2 --> chemosensitivity     | 28223335 | 10.1096/fj.2016012 |
| positive Regulation: MSI2 --> chemosensitivity     | 28223335 | 10.1096/fj.2016012 |
| positive Regulation: MSI2 --> chemosensitivity     | 28223335 | 10.1096/fj.2016012 |
| positive Regulation: MSI2 --> chemosensitivity     | 26308531 | 10.1371/journal.po |
| positive Regulation: MSI2 --> chemosensitivity     | 26308531 | 10.1371/journal.po |
| positive Regulation: MSI2 --> chemosensitivity     | 26308531 | 10.1371/journal.po |
| positive Regulation: MSI2 --> chemosensitivity     | 26308531 | 10.1371/journal.po |
| positive Regulation: MSI2 --> chemosensitivity     | 26308531 | 10.1371/journal.po |
| positive Regulation: TPI1 --> chemosensitivity     | 31461438 | 10.1371/journal.pb |
| positive Regulation: PAX5 --> chemosensitivity     | 35191417 | 10.1097/CM9.000000 |
| positive Regulation: PAX5 --> chemosensitivity     | 35191417 | 10.1097/CM9.000000 |
| positive Regulation: PAX5 --> chemosensitivity     | 35191417 | 10.1097/CM9.000000 |
| positive Regulation: MIR98 --> chemosensitivity    | 29670086 | 10.1038/s41419-018 |
| positive Regulation: MIR98 --> chemosensitivity    | 30387848 | 10.3892/ijo.2018.4 |
| positive Regulation: MIR98 --> chemosensitivity    |          | 10.4149/neo_2018_1 |
| positive Regulation: MIR98 --> chemosensitivity    | 33798550 | 10.1016/j.lfs.2021 |
| positive Regulation: MIR486-1 --> chemosensitivity | 30015845 | 10.3892/mmr.2018.9 |
| positive Regulation: MIR486-1 --> chemosensitivity | 31646573 | 10.26355/eurrev_20 |
| positive Regulation: MIR486-1 --> chemosensitivity | 31646573 | 10.26355/eurrev_20 |
| positive Regulation: MIR486-1 --> chemosensitivity | 32774717 |                    |
| positive Regulation: MIR486-1 --> chemosensitivity | 32086739 | 10.1007/s12017-020 |
| positive Regulation: MIR486-1 --> chemosensitivity | 32086739 | 10.1007/s12017-020 |
| positive Regulation: MIR486-1 --> chemosensitivity | 25655186 | 10.1111/hepr.12500 |
| positive Regulation: MIR486-1 --> chemosensitivity | 25655186 | 10.1111/hepr.12500 |
| positive Regulation: MIR486-1 --> chemosensitivity | 32086739 | 10.1007/s12017-020 |
| positive Regulation: MIR486-1 --> chemosensitivity | 32086739 | 10.1007/s12017-020 |
| positive Regulation: FOXO1 --> chemosensitivity    | 28351566 | 10.1016/j.oralonco |
| positive Regulation: FOXO1 --> chemosensitivity    | 27080594 | 10.1158/1940-6207. |
| positive Regulation: FOXO1 --> chemosensitivity    | 27966721 | 10.1039/c6mb00678g |
| positive Regulation: FOXO1 --> chemosensitivity    | 27966721 | 10.1039/c6mb00678g |
| positive Regulation: FOXO1 --> chemosensitivity    | 23615915 | 10.3892/ijo.2013.1 |
| positive Regulation: FOXO1 --> chemosensitivity    | 25749387 | 10.18632/oncotarge |
| positive Regulation: FOXO1 --> chemosensitivity    | 27966721 | 10.1039/c6mb00678g |
| positive Regulation: FOXO1 --> chemosensitivity    | 30982496 | 10.3727/096504018X |
| positive Regulation: FOXO1 --> chemosensitivity    | 31754475 | 10.1038/s41392-019 |
| positive Regulation: FOXO1 --> chemosensitivity    | 33199698 | 10.1038/s41392-019 |
| positive Regulation: FOXO1 --> chemosensitivity    | 35257265 | 10.1007/s10495-022 |
| positive Regulation: CBLL1 --> chemosensitivity    | 29786107 | 10.3892/ijmm.2018. |
| positive Regulation: CBLL1 --> chemosensitivity    | 29786107 | 10.3892/ijmm.2018. |
| positive Regulation: NME1 --> chemosensitivity     | 12898755 |                    |
| positive Regulation: NME1 --> chemosensitivity     | 14619565 |                    |
| positive Regulation: NME1 --> chemosensitivity     | 17953358 |                    |
| positive Regulation: NME1 --> chemosensitivity     | 21875478 |                    |
| positive Regulation: NME1 --> chemosensitivity     | 25277180 | 10.18632/oncotarge |
| positive Regulation: NME1 --> chemosensitivity     | 15296908 |                    |

|                                                    |          |                    |
|----------------------------------------------------|----------|--------------------|
| positive Regulation: CUL3 --> chemosensitivity     | 22825334 | 10.4161/cbt.21046  |
| positive Regulation: CUL3 --> chemosensitivity     | 36198437 | 10.1136/jitc-2022- |
| positive Regulation: CUL3 --> chemosensitivity     | 36198437 | 10.1136/jitc-2022- |
| positive Regulation: CUL3 --> chemosensitivity     | 36198437 | 10.1136/jitc-2022- |
| positive Regulation: MIR200A --> chemosensitivity  | 23874841 | 10.1371/journal.po |
| positive Regulation: MIR200A --> chemosensitivity  | 25997962 | 10.4149/neo_2015_0 |
| positive Regulation: MIR200A --> chemosensitivity  | 25997962 | 10.4149/neo_2015_0 |
| positive Regulation: MIR200A --> chemosensitivity  | 25327865 |                    |
| positive Regulation: MIR200A --> chemosensitivity  | 25997962 | 10.4149/neo_2015_0 |
| positive Regulation: MIR200A --> chemosensitivity  | 25997962 | 10.4149/neo_2015_0 |
| positive Regulation: MIR200A --> chemosensitivity  | 29329575 | 10.1186/s12885-017 |
| positive Regulation: MIR200A --> chemosensitivity  | 29329575 | 10.1186/s12885-017 |
| positive Regulation: MIR200A --> chemosensitivity  | 29329575 | 10.1186/s12885-017 |
| positive Regulation: MIR324 --> chemosensitivity   | 29221202 | 10.18632/oncotarge |
| positive Regulation: MIR324 --> chemosensitivity   | 35922753 | 10.1186/s11658-022 |
| positive Regulation: MIR105-1 --> chemosensitivity | 28618952 | 10.1177/1010428317 |
| positive Regulation: MIR105-1 --> chemosensitivity | 28618952 | 10.1177/1010428317 |
| positive Regulation: MIR105-1 --> chemosensitivity | 28618952 | 10.1177/1010428317 |
| positive Regulation: MIR105-1 --> chemosensitivity | 28618952 | 10.1177/1010428317 |
| positive Regulation: DKK3 --> chemosensitivity     | 21982838 | 10.1016/j.bbcan.20 |
| positive Regulation: DKK3 --> chemosensitivity     | 25760729 | 10.1089/cbr.2014.1 |
| positive Regulation: DKK3 --> chemosensitivity     | 25760729 | 10.1089/cbr.2014.1 |
| positive Regulation: DKK3 --> chemosensitivity     | 25760729 | 10.1089/cbr.2014.1 |
| positive Regulation: DKK3 --> chemosensitivity     | 25573172 | 10.3892/or.2014.37 |
| positive Regulation: MIR670 --> chemosensitivity   | 35805884 | 10.3390/ijms231368 |
| positive Regulation: DUSP26 --> chemosensitivity   | 20562916 | 10.1038/onc.2010.2 |
| positive Regulation: GLP1R --> chemosensitivity    | 31855560 | 10.1530/JME-19-018 |
| positive Regulation: STX8 --> chemosensitivity     | 19075597 | 10.2174/1568009087 |
| positive Regulation: CTSD --> chemosensitivity     | 16331270 |                    |
| positive Regulation: CTSD --> chemosensitivity     | 16331270 |                    |
| positive Regulation: CTSD --> chemosensitivity     | 27573911 | 10.3892/ijmm.2016. |
| positive Regulation: CTSD --> chemosensitivity     | 16331270 | 10.1038/sj.onc.120 |
| positive Regulation: CTSD --> chemosensitivity     | 18497069 | 10.1007/978-0-387- |
| positive Regulation: ID1 --> chemosensitivity      | 26797271 | 10.1016/j.bbrc.201 |
| positive Regulation: ID1 --> chemosensitivity      | 23308043 | 10.1593/neo.121044 |
| positive Regulation: ID1 --> chemosensitivity      | 20388787 | 10.1158/0008-5472. |
| positive Regulation: ID1 --> chemosensitivity      | 20388787 | 10.1158/0008-5472. |
| positive Regulation: REG1A --> chemosensitivity    | 24065141 | 10.3892/or.2013.27 |
| positive Regulation: FAP --> chemosensitivity      | 25344051 | 10.1186/1471-2407- |
| positive Regulation: MIR1243 --> chemosensitivity  | 33152930 | 10.1016/j.biopha.2 |
| positive Regulation: STAT1 --> chemosensitivity    | 29800921 | 10.1016/j.biopha.2 |
| positive Regulation: STAT1 --> chemosensitivity    | 28179302 | 10.21873/anticanre |
| positive Regulation: STAT1 --> chemosensitivity    | 28179302 | 10.21873/anticanre |
| positive Regulation: MAPK14 --> chemosensitivity   | 19435873 |                    |
| positive Regulation: SELENBP1 --> chemosensitivity | 23483240 |                    |
| positive Regulation: FOXO3 --> chemosensitivity    | 29518547 | 10.1016/j.gene.201 |
| positive Regulation: FOXO3 --> chemosensitivity    | 29518547 | 10.1016/j.gene.201 |
| positive Regulation: FOXO3 --> chemosensitivity    | 28260024 | 10.3892/or.2017.54 |
| positive Regulation: FOXO3 --> chemosensitivity    | 29099416 | 10.1097/CAD.000000 |
| positive Regulation: FOXO3 --> chemosensitivity    | 31695022 | 10.1038/s41419-019 |
| positive Regulation: FOXO3 --> chemosensitivity    | 32645698 | 10.1159/000508337  |
| positive Regulation: FOXO3 --> chemosensitivity    | 23255113 | 10.4161/cc.22962   |
| positive Regulation: FOXO3 --> chemosensitivity    | 22936386 | 10.1007/s10059-012 |
| positive Regulation: FOXO3 --> chemosensitivity    | 22313691 | 10.1016/j.cellsig. |

|                                                   |          |                    |
|---------------------------------------------------|----------|--------------------|
| positive Regulation: FOXO3 --> chemosensitivity   | 29518547 | 10.1016/j.gene.201 |
| positive Regulation: FOXO3 --> chemosensitivity   | 34510251 | 10.1007/s00280-021 |
| positive Regulation: FOXO3 --> chemosensitivity   | 35765274 | 10.3892/ol.2022.13 |
| positive Regulation: THRB --> chemosensitivity    | 25820519 | 10.1007/s10549-015 |
| positive Regulation: MIR30D --> chemosensitivity  | 29504819 | 10.1080/15384047.2 |
| positive Regulation: TGFBI --> chemosensitivity   | 19211240 | 10.1016/j.gde.2009 |
| positive Regulation: TGFBI --> chemosensitivity   | 26503734 | 10.3892/or.2015.43 |
| positive Regulation: TGFBI --> chemosensitivity   | 26503734 | 10.3892/or.2015.43 |
| positive Regulation: TGFBI --> chemosensitivity   | 26503734 | 10.3892/or.2015.43 |
| positive Regulation: PPARA --> chemosensitivity   | 31539552 | 10.1016/j.ejphar.2 |
| positive Regulation: PPARG --> chemosensitivity   | 22684020 | 10.1016/j.freerad  |
| positive Regulation: PPARG --> chemosensitivity   | 22684020 | 10.1016/j.freerad  |
| positive Regulation: PPARG --> chemosensitivity   | 32373170 | 10.1155/2020/64521 |
| positive Regulation: PPARG --> chemosensitivity   | 32373170 | 10.1155/2020/64521 |
| positive Regulation: PPARG --> chemosensitivity   | 32373170 | 10.1155/2020/64521 |
| positive Regulation: PPARG --> chemosensitivity   | 32373170 | 10.1155/2020/64521 |
| positive Regulation: PPARG --> chemosensitivity   | 32373170 | 10.1155/2020/64521 |
| positive Regulation: PPARG --> chemosensitivity   | 32373170 | 10.1155/2020/64521 |
| positive Regulation: PPARG --> chemosensitivity   | 32373170 | 10.1155/2020/64521 |
| positive Regulation: PPARG --> chemosensitivity   | 32373170 | 10.1155/2020/64521 |
| positive Regulation: PPARG --> chemosensitivity   | 32373170 | 10.1155/2020/64521 |
| positive Regulation: PPARG --> chemosensitivity   | 32373170 | 10.1155/2020/64521 |
| positive Regulation: PPARG --> chemosensitivity   | 32373170 | 10.1155/2020/64521 |
| positive Regulation: PPARG --> chemosensitivity   | 25333644 | 10.3892/ijo.2014.2 |
| positive Regulation: PPARG --> chemosensitivity   | 25333644 | 10.3892/ijo.2014.2 |
| positive Regulation: PPARG --> chemosensitivity   | 32373170 | 10.1155/2020/64521 |
| positive Regulation: PPARG --> chemosensitivity   | 23964924 | 10.1089/ars.2013.5 |
| positive Regulation: ANXA7 --> chemosensitivity   | 29970503 | 10.21873/anticanre |
| positive Regulation: CLDN4 --> chemosensitivity   | 24482188 | 10.3892/or.2014.29 |
| positive Regulation: CLDN4 --> chemosensitivity   | 31040910 | 10.18632/oncotarge |
| positive Regulation: CLDN4 --> chemosensitivity   | 31498559 | 10.1002/cam4.25471 |
| positive Regulation: CLDN4 --> chemosensitivity   | 32086991 | 10.1111/cas.143611 |
| positive Regulation: MIR23B --> chemosensitivity  | 34110366 | 10.1093/abbs/gmab0 |
| positive Regulation: RPL23 --> chemosensitivity   | 35733701 | 10.1007/s10616-022 |
| positive Regulation: RPL23 --> chemosensitivity   | 35733701 | 10.1007/s10616-022 |
| positive Regulation: MIR1284 --> chemosensitivity | 30257412 | 10.1016/j.biopha.2 |
| positive Regulation: ADORA2B --> chemosensitivity | 30926752 | 10.1523/JNEUROSCI. |
| positive Regulation: MIR623 --> chemosensitivity  | 30551491 | 10.1016/j.biopha.2 |
| positive Regulation: SIRT4 --> chemosensitivity   | 30008852 | 10.3892/ol.2018.88 |
| positive Regulation: SIRT4 --> chemosensitivity   | 30008852 | 10.3892/ol.2018.88 |
| positive Regulation: ATOH8 --> chemosensitivity   | 26099525 | 10.1053/j.gastro.2 |
| positive Regulation: ATOH8 --> chemosensitivity   | 33165366 |                    |
| positive Regulation: HIPK2 --> chemosensitivity   | 33650652 | 10.3892/or.2020.79 |
| positive Regulation: HIPK2 --> chemosensitivity   | 21602882 | 10.1038/onc.2011.1 |
| positive Regulation: HIPK2 --> chemosensitivity   | 21602882 | 10.1038/onc.2011.1 |
| positive Regulation: HIPK2 --> chemosensitivity   | 21602882 | 10.1038/onc.2011.1 |
| positive Regulation: HIPK2 --> chemosensitivity   | 24145406 | 10.1073/pnas.13100 |
| positive Regulation: HIPK2 --> chemosensitivity   | 24196445 | 10.4161/cc.26857   |
| positive Regulation: HIPK2 --> chemosensitivity   | 21602882 | 10.1038/onc.2011.1 |
| positive Regulation: HIPK2 --> chemosensitivity   | 22889244 | 10.1186/1756-9966- |
| positive Regulation: HIPK2 --> chemosensitivity   | 29434701 | 10.3892/etm.2017.5 |
| positive Regulation: HIPK2 --> chemosensitivity   | 33613771 | 10.7150/jca.521151 |
| positive Regulation: GSK3B --> chemosensitivity   | 27689729 | 10.1016/j.ejmech.2 |
| positive Regulation: GSK3B --> chemosensitivity   | 32422572 | 10.1016/j.tranon.2 |
| positive Regulation: GSK3B --> chemosensitivity   | 18606491 | 10.1016/j.canlet.2 |
| positive Regulation: GSK3B --> chemosensitivity   | 31323761 | 10.3390/ijms201435 |
| positive Regulation: GSK3B --> chemosensitivity   | 31665911 | 10.1177/0963689719 |

|                                                    |          |                    |
|----------------------------------------------------|----------|--------------------|
| positive Regulation: GSK3B --> chemosensitivity    | 31665911 | 10.1177/0963689719 |
| positive Regulation: GSK3B --> chemosensitivity    | 32422572 | 10.1016/j.tranon.2 |
| positive Regulation: GSK3B --> chemosensitivity    | 33125126 | 10.3892/or.2020.78 |
| positive Regulation: GSK3B --> chemosensitivity    | 33905062 | 10.1007/s11626-021 |
| positive Regulation: GSK3B --> chemosensitivity    | 24407515 | 10.4161/cc.27728   |
| positive Regulation: GSK3B --> chemosensitivity    | 15753396 | 10.1158/0008-5472. |
| positive Regulation: GSK3B --> chemosensitivity    | 26036631 | 10.18632/oncotarge |
| positive Regulation: GSK3B --> chemosensitivity    | 36012631 | 10.3390/ijms231693 |
| positive Regulation: MYCN --> chemosensitivity     | 32820040 | 10.1101/gad.340133 |
| positive Regulation: MYCN --> chemosensitivity     | 19885598 | 10.3892/or_0000058 |
| positive Regulation: MYCN --> chemosensitivity     | 32820040 | 10.1101/gad.340133 |
| positive Regulation: MYCN --> chemosensitivity     |          |                    |
| positive Regulation: BNIP3 --> chemosensitivity    | 28607593 | 10.7150/jca.181711 |
| positive Regulation: CDH2 --> chemosensitivity     | 33131267 | 10.4081/ejh.2020.3 |
| positive Regulation: CDH2 --> chemosensitivity     | 35887090 | 10.3390/ijms231477 |
| positive Regulation: PHGDH --> chemosensitivity    | 30857125 | 10.3390/ijms200511 |
| positive Regulation: PRKAG2 --> chemosensitivity   | 23457527 | 10.1371/journal.po |
| positive Regulation: MPO --> chemosensitivity      | 18273043 | 10.1038/leu.2008.8 |
| positive Regulation: MPO --> chemosensitivity      | 18273043 | 10.1038/leu.2008.8 |
| positive Regulation: MCPH1 --> chemosensitivity    |          | 10.1093/annonc/mdv |
| positive Regulation: PHOX2B --> chemosensitivity   | 30036539 | 10.1016/j.yexcr.20 |
| positive Regulation: PHOX2B --> chemosensitivity   | 30036539 | 10.1016/j.yexcr.20 |
| positive Regulation: PHOX2B --> chemosensitivity   | 16410396 | 10.1152/ajpregu.00 |
| positive Regulation: PHOX2B --> chemosensitivity   | 18675942 | 10.1016/j.resp.200 |
| positive Regulation: PHOX2B --> chemosensitivity   | 23723037 | 10.1002/cphy.c1000 |
| positive Regulation: CAV1 --> chemosensitivity     | 30917935 | 10.1016/j.ebiom.20 |
| positive Regulation: CAV1 --> chemosensitivity     | 18482795 | 10.1016/j.canlet.2 |
| positive Regulation: CAV1 --> chemosensitivity     | 32186270 | 10.2174/1381612826 |
| positive Regulation: CAV1 --> chemosensitivity     | 24131927 | 10.4161/cc.26809   |
| positive Regulation: CAV1 --> chemosensitivity     | 26503358 | 10.3892/or.2015.43 |
| positive Regulation: CAV1 --> chemosensitivity     | 23598719 | 10.4161/cc.2449710 |
| positive Regulation: CAV1 --> chemosensitivity     | 30146689 | 10.1002/jcp.271961 |
| positive Regulation: CAV1 --> chemosensitivity     | 31900313 | 10.1158/1541-7786. |
| positive Regulation: CAV1 --> chemosensitivity     | 34498146 | 10.1007/s00432-021 |
| positive Regulation: CAV1 --> chemosensitivity     | 34498146 | 10.1007/s00432-021 |
| positive Regulation: MIR199A1 --> chemosensitivity | 32634442 | 10.1016/j.mad.2020 |
| positive Regulation: MIR199A1 --> chemosensitivity | 24657660 | 10.1016/j.canlet.2 |
| positive Regulation: MIR199A1 --> chemosensitivity | 28079894 | 10.1038/cddis.2016 |
| positive Regulation: MIR199A1 --> chemosensitivity | 29436681 | 10.3892/or.2018.62 |
| positive Regulation: MIR199A1 --> chemosensitivity | 29436681 | 10.3892/or.2018.62 |
| positive Regulation: MIR199A1 --> chemosensitivity | 29204706 | 10.1007/s00345-017 |
| positive Regulation: MIR199A1 --> chemosensitivity |          |                    |
| positive Regulation: MIR199A1 --> chemosensitivity | 31636666 | 10.1155/2019/56134 |
| positive Regulation: MIR199A1 --> chemosensitivity | 31636666 | 10.1155/2019/56134 |
| positive Regulation: MIR199A1 --> chemosensitivity | 33245712 | 10.12659/MSM.92402 |
| positive Regulation: MIR199A1 --> chemosensitivity | 30575906 | 10.26355/eurrev_20 |
| positive Regulation: MIR199A1 --> chemosensitivity | 33526055 | 10.1186/s13046-021 |
| positive Regulation: MIR199A1 --> chemosensitivity | 28126676 | 10.1016/j.biopha.2 |
| positive Regulation: MIR199A1 --> chemosensitivity | 31898515 | 10.1186/s13046-019 |
| positive Regulation: MIR199A1 --> chemosensitivity |          | 10.1155/2019/56134 |
| positive Regulation: MIR199A1 --> chemosensitivity |          | 10.1155/2019/56134 |
| positive Regulation: MIR199A1 --> chemosensitivity |          |                    |
| positive Regulation: MIR199A1 --> chemosensitivity |          | 10.12659/MSM.92402 |
| positive Regulation: MIR199A1 --> chemosensitivity |          | 10.26355/eurrev_20 |

|                                   |                  |          |                    |
|-----------------------------------|------------------|----------|--------------------|
| positive Regulation: MIR199A1 --> | chemosensitivity | 35054811 | 10.3390/ijms230206 |
| positive Regulation: MIR199A1 --> | chemosensitivity |          |                    |
| positive Regulation: MIR199A1 --> | chemosensitivity |          |                    |
| positive Regulation: MIR199A1 --> | chemosensitivity | 24240682 | 10.1038/onc.2013.4 |
| positive Regulation: MIR199A1 --> | chemosensitivity | 35676254 | 10.1038/s41419-022 |
| positive Regulation: MIR199A1 --> | chemosensitivity | 35082400 | 10.1038/s41417-022 |
| positive Regulation: CHEK2 -->    | chemosensitivity | 17118344 | 10.1016/j.bcp.2006 |
| positive Regulation: CHEK2 -->    | chemosensitivity | 17118344 | 10.1016/j.bcp.2006 |
| positive Regulation: CHEK2 -->    | chemosensitivity | 17940507 |                    |
| positive Regulation: CHEK2 -->    | chemosensitivity | 29352124 | 10.1038/s41419-017 |
| positive Regulation: CHEK2 -->    | chemosensitivity | 23818585 | 10.1073/pnas.12208 |
| positive Regulation: CHEK2 -->    | chemosensitivity | 29352124 | 10.1038/s41419-017 |
| positive Regulation: MIR326 -->   | chemosensitivity | 27460077 | 10.1007/s13277-016 |
| positive Regulation: MIR326 -->   | chemosensitivity | 28627598 | 10.3892/ijo.2017.4 |
| positive Regulation: MIR326 -->   | chemosensitivity | 28713953 | 10.3892/or.2017.58 |
| positive Regulation: MIR326 -->   | chemosensitivity | 30764896 | 10.3727/096504018X |
| positive Regulation: MIR326 -->   | chemosensitivity | 30764896 | 10.3727/096504018X |
| positive Regulation: MIR326 -->   | chemosensitivity | 30764896 | 10.3727/096504018X |
| positive Regulation: MIR326 -->   | chemosensitivity | 30764896 | 10.3727/096504018X |
| positive Regulation: MIR326 -->   | chemosensitivity | 30764896 | 10.3727/096504018X |
| positive Regulation: MIR326 -->   | chemosensitivity | 31651347 | 10.1186/s12943-019 |
| positive Regulation: MIR326 -->   | chemosensitivity | 30764896 | 10.3727/096504018X |
| positive Regulation: MIR326 -->   | chemosensitivity |          | 10.3727/096504018X |
| positive Regulation: MIR326 -->   | chemosensitivity |          | 10.3727/096504018X |
| positive Regulation: MIR326 -->   | chemosensitivity |          | 10.3727/096504018X |
| positive Regulation: MIR326 -->   | chemosensitivity |          | 10.3727/096504018X |
| positive Regulation: MIR326 -->   | chemosensitivity |          | 10.3727/096504018X |
| positive Regulation: MIR326 -->   | chemosensitivity |          | 10.1186/s12943-019 |
| positive Regulation: MIR326 -->   | chemosensitivity | 33176632 | 10.2174/0929867327 |
| positive Regulation: BTG1 -->     | chemosensitivity |          | 10.1007/s12038-020 |
| positive Regulation: MIR664B -->  | chemosensitivity | 28176879 | 10.1038/srep423191 |
| positive Regulation: MIR664B -->  | chemosensitivity | 28176879 | 10.1038/srep423191 |
| positive Regulation: MIR588 -->   | chemosensitivity | 29187727 | 10.12659/MSM.90512 |
| positive Regulation: MIR588 -->   | chemosensitivity | 29187727 | 10.12659/MSM.90512 |
| positive Regulation: MIR588 -->   | chemosensitivity | 29187727 | 10.12659/MSM.90512 |
| positive Regulation: MIR588 -->   | chemosensitivity | 29187727 | 10.12659/MSM.90512 |
| positive Regulation: MIR588 -->   | chemosensitivity | 29187727 | 10.12659/msm.90512 |
| positive Regulation: IGFBP7 -->   | chemosensitivity | 24513543 | 10.1016/j.cca.2014 |
| positive Regulation: IGFBP7 -->   | chemosensitivity | 25984556 | 10.1016/j.gendis.2 |
| positive Regulation: IGFBP7 -->   | chemosensitivity | 23600329 |                    |
| positive Regulation: IGFBP7 -->   | chemosensitivity | 23600329 |                    |
| positive Regulation: MIR708 -->   | chemosensitivity | 32721464 | 10.1016/j.lfs.2020 |
| positive Regulation: MIR708 -->   | chemosensitivity | 33865701 | 10.1016/j.semcd.2  |
| positive Regulation: MIR708 -->   | chemosensitivity |          | 10.32604/BIOCELL.2 |
| positive Regulation: MIR708 -->   | chemosensitivity | 31273952 | 10.1111/jcmm.14462 |
| positive Regulation: MIR200C -->  | chemosensitivity | 32818543 | 10.1016/j.lfs.2020 |
| positive Regulation: MIR200C -->  | chemosensitivity | 29698868 | 10.1016/j.biomater |
| positive Regulation: MIR200C -->  | chemosensitivity | 30921705 | 10.1016/j.biopha.2 |
| positive Regulation: MIR200C -->  | chemosensitivity | 23757365 | 10.1016/j.drug.201 |
| positive Regulation: MIR200C -->  | chemosensitivity | 25281917 | 10.1016/j.addr.201 |
| positive Regulation: MIR200C -->  | chemosensitivity | 25958353 | 10.1016/j.phrs.201 |
| positive Regulation: MIR200C -->  | chemosensitivity | 26192966 | 10.1016/j.semcan   |
| positive Regulation: MIR200C -->  | chemosensitivity | 26257289 | 10.1016/j.critrev  |
| positive Regulation: MIR200C -->  | chemosensitivity | 28724364 | 10.1186/s12885-017 |
| positive Regulation: MIR200C -->  | chemosensitivity | 30226594 | 10.3892/ijo.2018.4 |
| positive Regulation: MIR200C -->  | chemosensitivity | 30272330 | 10.3892/or.2018.67 |







|                                                    |          |                    |
|----------------------------------------------------|----------|--------------------|
| positive Regulation: MEG3 --> chemosensitivity     | 25992654 | 10.1371/journal.po |
| positive Regulation: MEG3 --> chemosensitivity     | 28677749 | 10.3892/mmr.2017.6 |
| positive Regulation: MEG3 --> chemosensitivity     | 32618397 | 10.1002/jcla.23369 |
| positive Regulation: MEG3 --> chemosensitivity     | 29328401 | 10.3892/or.2018.61 |
| positive Regulation: MEG3 --> chemosensitivity     |          | 10.1016/j.gendis.2 |
| positive Regulation: MEG3 --> chemosensitivity     |          | 10.1016/j.gendis.2 |
| positive Regulation: MEG3 --> chemosensitivity     | 35184425 | 10.3349/ymj.2022.6 |
| positive Regulation: MEG3 --> chemosensitivity     |          | 10.1016/j.gendis.2 |
| positive Regulation: MEG3 --> chemosensitivity     | 35761379 | 10.1186/s12967-022 |
| positive Regulation: CISD2 --> chemosensitivity    | 32633348 | 10.26355/eurrev_20 |
| positive Regulation: KLF3-AS1 --> chemosensitivity | 34745937 | 10.3389/fonc.2021. |
| positive Regulation: MIR17 --> chemosensitivity    | 29953965 | 10.1016/j.biocel.2 |
| positive Regulation: MIR17 --> chemosensitivity    | 26554910 | 10.1016/j.jgg.2015 |
| positive Regulation: MIR17 --> chemosensitivity    | 30249919 | 10.2176/nmc.ra.201 |
| positive Regulation: MIR17 --> chemosensitivity    | 33390839 | 10.7150/ijbs.50773 |
| positive Regulation: MIR17 --> chemosensitivity    | 33462751 | 10.1007/s10863-020 |
| positive Regulation: MIR17 --> chemosensitivity    | 29953965 | 10.1016/j.biocel.2 |
| positive Regulation: MIR184 --> chemosensitivity   | 33689813 | 10.1016/j.micpath. |
| positive Regulation: PDCD5 --> chemosensitivity    | 22688731 | 10.4161/cbt.20565  |
| positive Regulation: PDCD5 --> chemosensitivity    | 22688731 | 10.4161/cbt.20565  |
| positive Regulation: PDCD5 --> chemosensitivity    | 22688731 | 10.4161/cbt.20565  |
| positive Regulation: PDCD5 --> chemosensitivity    | 25625867 | 10.3892/mmr.2015.3 |
| positive Regulation: PDCD5 --> chemosensitivity    | 25625867 | 10.3892/mmr.2015.3 |
| positive Regulation: PDCD5 --> chemosensitivity    | 26077467 | 10.1038/ncomms8390 |
| positive Regulation: PDCD5 --> chemosensitivity    | 26077467 | 10.1038/ncomms8390 |
| positive Regulation: PDCD5 --> chemosensitivity    | 22688731 | 10.4161/cbt.20565  |
| positive Regulation: PDCD5 --> chemosensitivity    | 24219296 | 10.1139/bcb-2013-0 |
| positive Regulation: PDCD5 --> chemosensitivity    | 25625867 | 10.3892/mmr.2015.3 |
| positive Regulation: MIR520B --> chemosensitivity  | 32355540 |                    |
| positive Regulation: MIR520B --> chemosensitivity  | 32355540 |                    |
| positive Regulation: MIR638 --> chemosensitivity   | 34257614 | 10.3389/pore.2021. |
| positive Regulation: MIR34A --> chemosensitivity   | 32243871 | 10.1016/j.ejphar.2 |
| positive Regulation: MIR34A --> chemosensitivity   | 27591936 | 10.1016/j.canlet.2 |
| positive Regulation: MIR34A --> chemosensitivity   | 29102917 | 10.1016/j.biopha.2 |
| positive Regulation: MIR34A --> chemosensitivity   | 30551433 | 10.1016/j.biopha.2 |
| positive Regulation: MIR34A --> chemosensitivity   | 33894312 | 10.1016/j.cellsig. |
| positive Regulation: MIR34A --> chemosensitivity   | 27263934 | 10.1016/j.critrevo |
| positive Regulation: MIR34A --> chemosensitivity   | 31158463 | 10.1016/j.semcance |
| positive Regulation: MIR34A --> chemosensitivity   | 29723707 | 10.1016/j.dnarep.2 |
| positive Regulation: MIR34A --> chemosensitivity   | 31760377 | 10.1016/j.omtn.201 |
| positive Regulation: MIR34A --> chemosensitivity   | 32304779 | 10.1016/j.jcmgh.20 |
| positive Regulation: MIR34A --> chemosensitivity   | 21145728 | 10.1016/j.ejca.201 |
| positive Regulation: MIR34A --> chemosensitivity   | 24786471 | 10.1016/j.febslet. |
| positive Regulation: MIR34A --> chemosensitivity   | 30001529 | 10.1159/000491665  |
| positive Regulation: MIR34A --> chemosensitivity   | 30001529 | 10.1159/000491665  |
| positive Regulation: MIR34A --> chemosensitivity   | 30106161 | 10.3892/mmr.2018.9 |
| positive Regulation: MIR34A --> chemosensitivity   | 30282072 | 10.1159/000494004  |
| positive Regulation: MIR34A --> chemosensitivity   | 30282072 | 10.1159/000494004  |
| positive Regulation: MIR34A --> chemosensitivity   | 30365088 | 10.3892/mmr.2018.9 |
| positive Regulation: MIR34A --> chemosensitivity   | 30374014 | 10.12659/MSM.91158 |
| positive Regulation: MIR34A --> chemosensitivity   | 30387834 | 10.3892/ijo.2018.4 |
| positive Regulation: MIR34A --> chemosensitivity   | 32626991 | 10.3892/mmr.2020.1 |
| positive Regulation: MIR34A --> chemosensitivity   | 32626991 | 10.3892/mmr.2020.1 |
| positive Regulation: MIR34A --> chemosensitivity   | 32626991 | 10.3892/mmr.2020.1 |

|                                  |                  |          |                    |
|----------------------------------|------------------|----------|--------------------|
| positive Regulation: MIR34A -->  | chemosensitivity | 32504411 | 10.1007/s12079-020 |
| positive Regulation: MIR34A -->  | chemosensitivity | 33562604 | 10.3390/ijms220416 |
| positive Regulation: MIR34A -->  | chemosensitivity | 34103477 | 10.1038/s41419-021 |
| positive Regulation: MIR34A -->  | chemosensitivity | 33423646 | 10.2174/1568009620 |
| positive Regulation: MIR34A -->  | chemosensitivity | 23497288 | 10.1186/1475-2867- |
| positive Regulation: MIR34A -->  | chemosensitivity | 23824643 | 10.1007/s12032-013 |
| positive Regulation: MIR34A -->  | chemosensitivity | 24418846 | 10.4161/auto.27418 |
| positive Regulation: MIR34A -->  | chemosensitivity | 24423412 | 10.1186/1476-4598- |
| positive Regulation: MIR34A -->  | chemosensitivity | 25179842 | 10.1007/s13277-014 |
| positive Regulation: MIR34A -->  | chemosensitivity | 26371779 | 10.1097/CC0.000000 |
| positive Regulation: MIR34A -->  | chemosensitivity | 26499184 | 10.3892/or.2015.43 |
| positive Regulation: MIR34A -->  | chemosensitivity | 26499184 | 10.3892/or.2015.43 |
| positive Regulation: MIR34A -->  | chemosensitivity | 26782555 | 10.4238/2015.Decer |
| positive Regulation: MIR34A -->  | chemosensitivity | 21960059 | 10.1002/path.30071 |
| positive Regulation: MIR34A -->  | chemosensitivity | 23085450 | 10.1016/j.arcmed.2 |
| positive Regulation: MIR34A -->  | chemosensitivity | 24418846 | 10.4161/auto.27418 |
| positive Regulation: MIR34A -->  | chemosensitivity | 25783790 | 10.1111/cas.126561 |
| positive Regulation: MIR34A -->  | chemosensitivity | 25783790 | 10.1111/cas.126561 |
| positive Regulation: MIR34A -->  | chemosensitivity | 26499184 | 10.3892/or.2015.43 |
| positive Regulation: MIR34A -->  | chemosensitivity | 26499184 | 10.3892/or.2015.43 |
| positive Regulation: MIR34A -->  | chemosensitivity | 30001529 | 10.1159/0004916651 |
| positive Regulation: MIR34A -->  | chemosensitivity | 30001529 | 10.1159/0004916651 |
| positive Regulation: MIR34A -->  | chemosensitivity | 30001529 | 10.1159/0004916651 |
| positive Regulation: MIR34A -->  | chemosensitivity | 30282072 | 10.1159/0004940041 |
| positive Regulation: MIR34A -->  | chemosensitivity | 31332647 | 10.1007/s13402-019 |
| positive Regulation: MIR34A -->  | chemosensitivity | 32044957 | 10.1093/jb/mvaa012 |
| positive Regulation: MIR34A -->  | chemosensitivity | 34440380 | 10.3390/genes12081 |
| positive Regulation: MIR34A -->  | chemosensitivity |          | 10.4161/auto.27418 |
| positive Regulation: MIR34A -->  | chemosensitivity |          | 10.1097/CC0.000000 |
| positive Regulation: MIR34A -->  | chemosensitivity | 22762204 | 10.1042/BSR2011012 |
| positive Regulation: MIR34A -->  | chemosensitivity |          |                    |
| positive Regulation: MIR34A -->  | chemosensitivity |          |                    |
| positive Regulation: MIR34A -->  | chemosensitivity | 33959850 | 10.1007/s10555-021 |
| positive Regulation: MIR34A -->  | chemosensitivity | 34861419 | 10.1016/j.preteyer |
| positive Regulation: MIR34A -->  | chemosensitivity |          | 10.31083/j.ceog490 |
| positive Regulation: MIR34A -->  | chemosensitivity |          | 10.31083/j.ceog490 |
| positive Regulation: MIR34A -->  | chemosensitivity |          | 10.31083/j.ceog490 |
| positive Regulation: MIR34A -->  | chemosensitivity |          | 10.31083/j.ceog490 |
| positive Regulation: MIR34A -->  | chemosensitivity |          | 10.31083/j.ceog490 |
| positive Regulation: MIR34A -->  | chemosensitivity |          | 10.31083/j.ceog490 |
| positive Regulation: MIR34A -->  | chemosensitivity |          | 10.31083/j.ceog490 |
| positive Regulation: MIR34A -->  | chemosensitivity | 35834883 | 10.1016/j.prp.2022 |
| positive Regulation: MIR34A -->  | chemosensitivity | 34629041 | 10.2174/1389450122 |
| positive Regulation: DDRGK1 -->  | chemosensitivity | 33219317 | 10.1038/s41388-020 |
| positive Regulation: HDAC2 -->   | chemosensitivity | 33872660 | 10.1016/j.lfs.2021 |
| positive Regulation: HDAC2 -->   | chemosensitivity | 22154511 | 10.1016/j.yexcr.20 |
| positive Regulation: HDAC2 -->   | chemosensitivity | 22154511 | 10.1016/j.yexcr.20 |
| positive Regulation: SLC38A3 --> | chemosensitivity | 27467507 | 10.1371/journal.po |
| positive Regulation: SLC38A3 --> | chemosensitivity | 27467507 | 10.1371/journal.po |
| positive Regulation: MIR570 -->  | chemosensitivity | 34440380 | 10.3390/genes12081 |
| positive Regulation: MIR29A -->  | chemosensitivity | 24210072 | 10.1016/j.biopha.2 |
| positive Regulation: MIR29A -->  | chemosensitivity | 28347239 | 10.1177/1010428317 |
| positive Regulation: MIR29A -->  | chemosensitivity | 29217524 | 10.1042/BSR2017126 |
| positive Regulation: SPRY2 -->   | chemosensitivity | 29373811 | 10.1016/j.abb.2018 |

|                                                      |          |                    |
|------------------------------------------------------|----------|--------------------|
| positive Regulation: DCN --> chemosensitivity        | 25550184 | 10.1016/j.bbrc.201 |
| positive Regulation: DCN --> chemosensitivity        | 25550184 | 10.1016/j.bbrc.201 |
| positive Regulation: DCN --> chemosensitivity        | 28631095 | 10.1007/s10637-017 |
| positive Regulation: DCN --> chemosensitivity        | 28631095 | 10.1007/s10637-017 |
| positive Regulation: DCN --> chemosensitivity        | 28631095 | 10.1007/s10637-017 |
| positive Regulation: MMP3 --> chemosensitivity       | 31432178 | 10.3892/or.2019.72 |
| positive Regulation: CXCL12 --> chemosensitivity     | 29903571 | 10.1016/j.cyto.201 |
| positive Regulation: CXCL12 --> chemosensitivity     | 31096215 | 10.1159/000497430  |
| positive Regulation: CXCL12 --> chemosensitivity     | 29903571 | 10.1016/j.cyto.201 |
| positive Regulation: CXCL12 --> chemosensitivity     | 30453100 | 10.1016/j.leukres. |
| positive Regulation: MIR498 --> chemosensitivity     | 33186139 | 10.1097/CAD.000000 |
| positive Regulation: TIMP2 --> chemosensitivity      | 23474755 | 10.1038/onc.2013.6 |
| positive Regulation: TIMP2 --> chemosensitivity      | 23474755 | 10.1038/onc.2013.6 |
| positive Regulation: TIMP2 --> chemosensitivity      | 23474755 | 10.1038/onc.2013.6 |
| positive Regulation: TIMP2 --> chemosensitivity      | 35586209 | 10.1155/2022/32497 |
| positive Regulation: TIMP2 --> chemosensitivity      | 36585738 | 10.1186/s12935-022 |
| positive Regulation: bradykinin --> chemosensitivity | 25914087 | 10.1016/j.lfs.2015 |
| positive Regulation: MIR373 --> chemosensitivity     | 27512943 | 10.1016/j.biomater |
| positive Regulation: MIR373 --> chemosensitivity     | 30021382 | 10.1016/j.biopha.2 |
| positive Regulation: MIR373 --> chemosensitivity     | 30021382 | 10.1016/j.biopha.2 |
| positive Regulation: MIR373 --> chemosensitivity     | 30021382 | 10.1016/j.biopha.2 |
| positive Regulation: MIR373 --> chemosensitivity     | 34839317 | 10.1097/CM9.000000 |
| positive Regulation: ERRF11 --> chemosensitivity     | 21190978 | 10.1210/jc.2010-18 |
| positive Regulation: ING1 --> chemosensitivity       | 12012016 |                    |
| positive Regulation: ING1 --> chemosensitivity       | 15191662 |                    |
| positive Regulation: ING1 --> chemosensitivity       | 15662138 | 10.4161/cbt.4.1.13 |
| positive Regulation: ING1 --> chemosensitivity       | 16325212 | 10.1016/j.lfs.2005 |
| positive Regulation: ING1 --> chemosensitivity       | 32831651 | 10.1186/s12935-020 |
| positive Regulation: ING1 --> chemosensitivity       |          |                    |
| positive Regulation: ING1 --> chemosensitivity       | 34786051 |                    |
| positive Regulation: CASP3 --> chemosensitivity      | 33711308 | 10.1016/j.ejphar.2 |
| positive Regulation: CASP3 --> chemosensitivity      | 19047049 | 10.1074/jbc.M80670 |
| positive Regulation: CASP3 --> chemosensitivity      | 32422231 | 10.1016/j.exphem.2 |
| positive Regulation: CASP3 --> chemosensitivity      | 23974068 | 10.1016/j.drudis.2 |
| positive Regulation: CASP3 --> chemosensitivity      | 19047049 |                    |
| positive Regulation: CASP3 --> chemosensitivity      | 11420687 |                    |
| positive Regulation: CASP3 --> chemosensitivity      | 24535252 | 10.3892/ijo.2014.2 |
| positive Regulation: CASP3 --> chemosensitivity      | 11420687 | 10.1038/sj.onc.120 |
| positive Regulation: CASP3 --> chemosensitivity      | 30774365 | 10.2147/OTT.S19123 |
| positive Regulation: CASP3 --> chemosensitivity      | 33363619 | 10.3892/o1.2020.12 |
| positive Regulation: HBEGF --> chemosensitivity      | 34360915 | 10.3390/ijms221581 |
| positive Regulation: IRF1 --> chemosensitivity       | 30980967 | 10.1016/j.pvr.2019 |
| positive Regulation: IRF1 --> chemosensitivity       | 24632547 | 10.1097/MPA.000000 |
| positive Regulation: IRF1 --> chemosensitivity       | 24632547 | 10.1097/MPA.000000 |
| positive Regulation: IRF1 --> chemosensitivity       | 24632547 | 10.1097/MPA.000000 |
| positive Regulation: IRF1 --> chemosensitivity       | 22531515 | 10.4103/0973-1482. |
| positive Regulation: IRF1 --> chemosensitivity       |          | 10.1097/MPA.000000 |
| positive Regulation: IRF1 --> chemosensitivity       |          | 10.1097/MPA.000000 |
| positive Regulation: IRF1 --> chemosensitivity       |          | 10.1097/MPA.000000 |
| positive Regulation: IRF1 --> chemosensitivity       | 35092496 | 10.1007/s12032-021 |
| positive Regulation: ARNTL --> chemosensitivity      | 30621723 | 10.1186/s13046-018 |
| positive Regulation: ARNTL --> chemosensitivity      | 30959483 | 10.1530/ERC-19-009 |

|                                                    |          |                    |
|----------------------------------------------------|----------|--------------------|
| positive Regulation: ARNTL --> chemosensitivity    | 33824475 | 10.1038/s41388-021 |
| positive Regulation: ARNTL --> chemosensitivity    | 25175925 | 10.3892/ijo.2014.2 |
| positive Regulation: ARNTL --> chemosensitivity    | 25175925 | 10.3892/ijo.2014.2 |
| positive Regulation: ARNTL --> chemosensitivity    | 25175925 | 10.3892/ijo.2014.2 |
| positive Regulation: ARNTL --> chemosensitivity    | 25175925 | 10.3892/ijo.2014.2 |
| positive Regulation: ARNTL --> chemosensitivity    | 26253128 | 10.1186/s40880-015 |
| positive Regulation: ARNTL --> chemosensitivity    | 25175925 | 10.3892/ijo.2014.2 |
| positive Regulation: ARNTL --> chemosensitivity    |          | 10.1186/s13046-018 |
| positive Regulation: ARNTL --> chemosensitivity    |          | 10.1530/ERC-19-009 |
| positive Regulation: MIR181B1 --> chemosensitivity | 29360452 | 10.1016/j.bbrc.201 |
| positive Regulation: MIR181B1 --> chemosensitivity | 30119173 | 10.1016/j.biopha.2 |
| positive Regulation: MIR181B1 --> chemosensitivity | 30551476 | 10.1016/j.biopha.2 |
| positive Regulation: MIR181B1 --> chemosensitivity | 30551476 | 10.1016/j.biopha.2 |
| positive Regulation: MIR181B1 --> chemosensitivity | 30551476 | 10.1016/j.biopha.2 |
| positive Regulation: MIR181B1 --> chemosensitivity | 28501897 | 10.1007/s11060-017 |
| positive Regulation: MIR181B1 --> chemosensitivity | 28501897 | 10.1007/s11060-017 |
| positive Regulation: MIR181B1 --> chemosensitivity | 28501897 | 10.1007/s11060-017 |
| positive Regulation: MIR181B1 --> chemosensitivity | 28501897 | 10.1007/s11060-017 |
| positive Regulation: MIR181B1 --> chemosensitivity | 28501897 | 10.1007/s11060-017 |
| positive Regulation: MIR181B1 --> chemosensitivity | 28501897 | 10.1007/s11060-017 |
| positive Regulation: MIR181B1 --> chemosensitivity | 28501897 | 10.1007/s11060-017 |
| positive Regulation: MIR181B1 --> chemosensitivity | 28501897 | 10.1007/s11060-017 |
| positive Regulation: MIR181B1 --> chemosensitivity | 28501897 | 10.1007/s11060-017 |
| positive Regulation: MIR181B1 --> chemosensitivity | 29725260 | 10.7150/ijbs.22243 |
| positive Regulation: MIR181B1 --> chemosensitivity | 30182330 | 10.1007/s12017-018 |
| positive Regulation: MIR181B1 --> chemosensitivity | 31087138 | 10.1007/s00280-019 |
| positive Regulation: MIR181B1 --> chemosensitivity | 31858559 | 10.26355/eurrev_20 |
| positive Regulation: MIR181B1 --> chemosensitivity | 23645289 | 10.1007/s00280-013 |
| positive Regulation: MIR181B1 --> chemosensitivity | 26620926 | 10.1038/srep17618  |
| positive Regulation: MIR181B1 --> chemosensitivity | 26620926 | 10.1038/srep176181 |
| positive Regulation: MIR181B1 --> chemosensitivity | 26620926 | 10.1038/srep176181 |
| positive Regulation: MIR181B1 --> chemosensitivity | 26620926 | 10.1038/srep176181 |
| positive Regulation: MIR181B1 --> chemosensitivity | 28501897 | 10.1007/s11060-017 |
| positive Regulation: MIR181B1 --> chemosensitivity | 30551476 | 10.1016/j.biopha.2 |
| positive Regulation: MIR181B1 --> chemosensitivity | 35198024 | 10.1155/2022/24022 |
| positive Regulation: MIR181B1 --> chemosensitivity | 35457012 | 10.3390/ijms230841 |
| positive Regulation: MIR200B --> chemosensitivity  | 28823964 | 10.1016/j.canlet.2 |
| positive Regulation: MIR200B --> chemosensitivity  | 33892053 | 10.1016/j.bbcan.20 |
| positive Regulation: MIR200B --> chemosensitivity  | 32187964 | 10.1016/j.biopha.2 |
| positive Regulation: MIR200B --> chemosensitivity  | 34023767 | 10.1016/j.ctarc.20 |
| positive Regulation: MIR200B --> chemosensitivity  | 34023767 | 10.1016/j.ctarc.20 |
| positive Regulation: MIR200B --> chemosensitivity  | 22795796 | 10.1016/j.biopha.2 |
| positive Regulation: MIR200B --> chemosensitivity  | 28152297 | 10.14348/molcells. |
| positive Regulation: MIR200B --> chemosensitivity  | 29534583 | 10.4149/neo_2018_1 |
| positive Regulation: MIR200B --> chemosensitivity  | 30628651 | 10.3892/ijo.2019.4 |
| positive Regulation: MIR200B --> chemosensitivity  | 33390839 | 10.7150/ijbs.50773 |
| positive Regulation: MIR200B --> chemosensitivity  | 23806890 | 10.4161/rna.25481  |
| positive Regulation: MIR200B --> chemosensitivity  | 24317363 | 10.3892/or.2013.28 |
| positive Regulation: MIR200B --> chemosensitivity  | 24317363 | 10.3892/or.2013.28 |
| positive Regulation: MIR200B --> chemosensitivity  | 24317363 | 10.3892/or.2013.28 |
| positive Regulation: MIR200B --> chemosensitivity  | 24447584 | 10.1186/1479-5876- |
| positive Regulation: MIR200B --> chemosensitivity  | 25065598 | 10.1038/onc.2014.2 |
| positive Regulation: MIR200B --> chemosensitivity  | 26648487 | 10.3892/ijo.2015.3 |
| positive Regulation: MIR200B --> chemosensitivity  | 24317363 | 10.3892/or.2013.28 |
| positive Regulation: MIR200B --> chemosensitivity  | 24317363 | 10.3892/or.2013.28 |

|                                                    |          |                    |
|----------------------------------------------------|----------|--------------------|
| positive Regulation: MIR200B --> chemosensitivity  | 27027446 | 10.18632/oncotarge |
| positive Regulation: KIZ --> chemosensitivity      | 33000253 | 10.3892/or.2020.77 |
| positive Regulation: KLF10 --> chemosensitivity    | 18930345 | 10.1016/j.canlet.2 |
| positive Regulation: KLF10 --> chemosensitivity    | 18930345 | 10.1016/j.canlet.2 |
| positive Regulation: MIR181A1 --> chemosensitivity | 28823541 | 10.1016/j.toxlet.2 |
| positive Regulation: MIR181A1 --> chemosensitivity | 28823541 | 10.1016/j.toxlet.2 |
| positive Regulation: MIR181A1 --> chemosensitivity | 24183997 | 10.1016/j.yexpr.20 |
| positive Regulation: MIR181A1 --> chemosensitivity | 24183997 | 10.1016/j.yexpr.20 |
| positive Regulation: MIR181A1 --> chemosensitivity | 30309296 | 10.1177/1933719118 |
| positive Regulation: MIR181A1 --> chemosensitivity | 31832711 | 10.1007/s00253-019 |
| positive Regulation: MIR181A1 --> chemosensitivity | 32875398 | 10.1007/s10565-020 |
| positive Regulation: MIR181A1 --> chemosensitivity | 22762204 | 10.1042/BSR2011012 |
| positive Regulation: MIR181A1 --> chemosensitivity | 24573637 | 10.1007/s12032-014 |
| positive Regulation: MIR181A1 --> chemosensitivity | 31737213 |                    |
| positive Regulation: MIR181A1 --> chemosensitivity | 32810491 | 10.1016/j.ejphar.2 |
| positive Regulation: MIR181A1 --> chemosensitivity | 26910006 | 10.4238/gmr.150177 |
| positive Regulation: MIR181A1 --> chemosensitivity | 24573637 | 10.1007/s12032-014 |
| positive Regulation: MIR181A1 --> chemosensitivity | 34453645 | 10.1007/s11010-021 |
| positive Regulation: CSF3 --> chemosensitivity     | 25131807 | 10.1016/j.cytogfr. |
| positive Regulation: CSF3 --> chemosensitivity     | 29243031 | 10.1007/s12185-017 |
| positive Regulation: CSF3 --> chemosensitivity     | 7563592  |                    |
| positive Regulation: CSF3 --> chemosensitivity     | 10086796 | 10.1046/j.1365-214 |
| positive Regulation: CSF3 --> chemosensitivity     | 25908586 | 10.1158/0008-5472. |
| positive Regulation: FBXW7 --> chemosensitivity    | 27398136 |                    |
| positive Regulation: FBXW7 --> chemosensitivity    | 27247392 | 10.1073/pnas.16068 |
| positive Regulation: FBXW7 --> chemosensitivity    | 32572597 | 10.1007/s00401-020 |
| positive Regulation: FBXW7 --> chemosensitivity    | 29633504 | 10.1002/1878-0261. |
| positive Regulation: FBXW7 --> chemosensitivity    | 30094882 | 10.1111/cpr.124731 |
| positive Regulation: FBXW7 --> chemosensitivity    | 33147048 | 10.4149/neo_2020_2 |
| positive Regulation: ANXA1 --> chemosensitivity    | 30292410 | 10.1016/j.bbrc.201 |
| positive Regulation: ANXA1 --> chemosensitivity    | 32006544 | 10.1016/j.cca.2020 |
| positive Regulation: ANXA1 --> chemosensitivity    | 31882477 | 10.21873/invivo.11 |
| positive Regulation: ANXA1 --> chemosensitivity    | 34439260 | 10.3390/cancers131 |
| positive Regulation: ANXA1 --> chemosensitivity    |          | 10.21873/invivo.11 |
| positive Regulation: IL15 --> chemosensitivity     |          | 10.1016/j.hbpd.202 |
| positive Regulation: IL15 --> chemosensitivity     | 34538570 | 10.1016/j.hbpd.202 |
| positive Regulation: PKM --> chemosensitivity      | 27045080 | 10.1016/j.bbrc.201 |
| positive Regulation: PKM --> chemosensitivity      | 31132429 | 10.1016/j.canlet.2 |
| positive Regulation: PKM --> chemosensitivity      | 28757126 | 10.1016/j.bbcan.20 |
| positive Regulation: PKM --> chemosensitivity      | 27593857 | 10.3349/ymj.2016.5 |
| positive Regulation: PKM --> chemosensitivity      | 33503959 | 10.3390/ijms220311 |
| positive Regulation: PKM --> chemosensitivity      | 27045080 | 10.1016/j.bbrc.201 |
| positive Regulation: PKM --> chemosensitivity      | 29312802 |                    |
| positive Regulation: MIR181C --> chemosensitivity  | 30537505 | 10.1016/j.ijbiomac |
| positive Regulation: MIR181C --> chemosensitivity  | 28956120 | 10.1007/s00280-017 |
| positive Regulation: MIR181C --> chemosensitivity  | 33087705 | 10.1038/s41419-020 |
| positive Regulation: MIR181C --> chemosensitivity  | 33087705 | 10.1038/s41419-020 |
| positive Regulation: MIR181C --> chemosensitivity  | 33087705 | 10.1038/s41419-020 |
| positive Regulation: MIR181C --> chemosensitivity  | 33087705 | 10.1038/s41419-020 |
| positive Regulation: MIR181C --> chemosensitivity  | 30537505 | 10.1016/j.ijbiomac |
| positive Regulation: MIR181C --> chemosensitivity  | 30537505 | 10.1016/j.ijbiomac |
| positive Regulation: TGFBR2 --> chemosensitivity   | 23457527 | 10.1371/journal.po |
| positive Regulation: NELL1 --> chemosensitivity    | 30628703 | 10.3892/or.2019.69 |
| positive Regulation: MIR198 --> chemosensitivity   | 33684406 | 10.1016/j.jtbi.202 |

|                                    |                  |          |                    |
|------------------------------------|------------------|----------|--------------------|
| positive Regulation: MIR198 -->    | chemosensitivity | 23069480 | 10.1016/j.ejca.201 |
| positive Regulation: MIR198 -->    | chemosensitivity | 28425046 | 10.1007/s11060-017 |
| positive Regulation: MIR198 -->    | chemosensitivity | 28425046 | 10.1007/s11060-017 |
| positive Regulation: MIR198 -->    | chemosensitivity | 28425046 | 10.1007/s11060-017 |
| positive Regulation: MIR198 -->    | chemosensitivity | 28425046 | 10.1007/s11060-017 |
| positive Regulation: MIR198 -->    | chemosensitivity | 28765921 | 10.3892/or.2017.58 |
| positive Regulation: MIR198 -->    | chemosensitivity | 28765921 | 10.3892/or.2017.58 |
| positive Regulation: MIR198 -->    | chemosensitivity | 29749457 | 10.3892/mmr.2018.8 |
| positive Regulation: MIR198 -->    | chemosensitivity | 28425046 | 10.1007/s11060-017 |
| positive Regulation: MIR198 -->    | chemosensitivity | 28425046 | 10.1007/s11060-017 |
| positive Regulation: MIR198 -->    | chemosensitivity | 28425046 | 10.1007/s11060-017 |
| positive Regulation: MIR198 -->    | chemosensitivity | 28425046 | 10.1007/s11060-017 |
| positive Regulation: MIR198 -->    | chemosensitivity | 28765921 | 10.3892/or.2017.58 |
| positive Regulation: MIR198 -->    | chemosensitivity | 35559396 |                    |
| positive Regulation: MIR198 -->    | chemosensitivity | 35559396 |                    |
| positive Regulation: PACAP 38 -->  | chemosensitivity | 22874427 | 10.1152/ajpregu.00 |
| positive Regulation: MIR409 -->    | chemosensitivity | 28928082 | 10.1016/j.yexpr.20 |
| positive Regulation: MIR409 -->    | chemosensitivity | 28922711 | 10.1016/j.biopha.2 |
| positive Regulation: MIR409 -->    | chemosensitivity | 32582997 | 10.3892/or.2020.76 |
| positive Regulation: MIR409 -->    | chemosensitivity | 32662828 | 10.1042/BSR2020172 |
| positive Regulation: MIR409 -->    | chemosensitivity | 32875398 | 10.1007/s10565-020 |
| positive Regulation: MIR409 -->    | chemosensitivity | 29242506 | 10.1038/s41408-017 |
| positive Regulation: MIR568 -->    | chemosensitivity | 33499874 | 10.1186/s13046-021 |
| positive Regulation: MIR568 -->    | chemosensitivity | 33499874 | 10.1186/s13046-021 |
| positive Regulation: ARRB1 -->     | chemosensitivity | 30261591 | 10.3390/ijms191029 |
| positive Regulation: MIR26B -->    | chemosensitivity | 27717846 | 10.1016/j.lfs.2016 |
| positive Regulation: MIR26B -->    | chemosensitivity | 25571061 | 10.1109/EMBC.2014. |
| positive Regulation: MIR26B -->    | chemosensitivity | 32505000 | 10.1016/j.omtn.202 |
| positive Regulation: MIR26B -->    | chemosensitivity | 27376741 | 10.1007/978-981-10 |
| positive Regulation: MIR26B -->    | chemosensitivity | 28281961 | 10.3727/096504016X |
| positive Regulation: MIR26B -->    | chemosensitivity | 29291351 | 10.1038/nm.4461    |
| positive Regulation: MIR26B -->    | chemosensitivity | 24565101 | 10.1186/1476-4598- |
| positive Regulation: MIR26B -->    | chemosensitivity | 24565101 | 10.1186/1476-4598- |
| positive Regulation: MIR26B -->    | chemosensitivity | 35416706 | 10.1128/iai.00120- |
| positive Regulation: RARA -->      | chemosensitivity | 28412739 | 10.18632/oncotarge |
| positive Regulation: MIRLET7A1 --> | chemosensitivity | 28445844 | 10.1016/j.tranon.2 |
| positive Regulation: MIRLET7A1 --> | chemosensitivity | 26687759 | 10.1007/s13277-015 |
| positive Regulation: MIRLET7A1 --> | chemosensitivity | 28954272 | 10.1159/000481610  |
| positive Regulation: MIRLET7A1 --> | chemosensitivity | 28954272 | 10.1159/000481610  |
| positive Regulation: MIRLET7A1 --> | chemosensitivity | 28954272 | 10.1159/000481610  |
| positive Regulation: MIRLET7A1 --> | chemosensitivity | 28954272 | 10.1159/000481610  |
| positive Regulation: MIRLET7A1 --> | chemosensitivity | 28954272 | 10.1159/000481610  |
| positive Regulation: MIRLET7A1 --> | chemosensitivity | 28954272 | 10.1159/000481610  |
| positive Regulation: MIRLET7A1 --> | chemosensitivity | 31189742 | 10.1042/BSR2018210 |
| positive Regulation: MIRLET7A1 --> | chemosensitivity | 23676502 | 10.1172/JCI66553   |
| positive Regulation: MIRLET7A1 --> | chemosensitivity | 26218285 | 10.1371/journal.po |
| positive Regulation: MIRLET7A1 --> | chemosensitivity | 26218285 | 10.1371/journal.po |
| positive Regulation: MIRLET7A1 --> | chemosensitivity | 26218285 | 10.1371/journal.po |
| positive Regulation: MIRLET7A1 --> | chemosensitivity | 26218285 | 10.1371/journal.po |
| positive Regulation: MIRLET7A1 --> | chemosensitivity | 26218285 | 10.1371/journal.po |
| positive Regulation: MIRLET7A1 --> | chemosensitivity | 26218285 | 10.1371/journal.po |
| positive Regulation: MIRLET7A1 --> | chemosensitivity | 23335963 | 10.1371/journal.po |
| positive Regulation: MIRLET7A1 --> | chemosensitivity | 23676502 | 10.1172/JCI6655310 |
| positive Regulation: MIRLET7A1 --> | chemosensitivity |          | 10.1042/BSR2018210 |
| positive Regulation: MIR142 -->    | chemosensitivity | 30639456 | 10.1016/j.bcp.2019 |
| positive Regulation: MIR142 -->    | chemosensitivity | 23410826 | 10.1016/j.lungcan. |
| positive Regulation: MIR142 -->    | chemosensitivity | 29844410 | 10.1038/s41419-018 |



|                                  |                  |          |                    |
|----------------------------------|------------------|----------|--------------------|
| positive Regulation: MIR142 -->  | chemosensitivity | 30266744 | 10.1042/BSR2018051 |
| positive Regulation: MIR142 -->  | chemosensitivity | 30092578 | 10.1159/000492517  |
| positive Regulation: MIR142 -->  | chemosensitivity | 32582997 | 10.3892/or.2020.76 |
| positive Regulation: MIR142 -->  | chemosensitivity | 33648498 | 10.1186/s12943-021 |
| positive Regulation: MIR142 -->  | chemosensitivity | 33648498 | 10.1186/s12943-021 |
| positive Regulation: MIR142 -->  | chemosensitivity | 28427045 | 10.1159/0004678961 |
| positive Regulation: MIR142 -->  | chemosensitivity | 32642410 | 10.1016/j.apsb.201 |
| positive Regulation: MIR142 -->  | chemosensitivity |          | 10.1042/BSR2018051 |
| positive Regulation: MIR142 -->  | chemosensitivity | 35413227 | 10.1139/cjpp-2022- |
| positive Regulation: STK4 -->    | chemosensitivity | 30958437 | 10.1097/CM9.000000 |
| positive Regulation: STK4 -->    | chemosensitivity | 23419720 | 10.1093/abbs/gmt00 |
| positive Regulation: STK4 -->    | chemosensitivity | 35295003 | 10.4103/aja2021117 |
| positive Regulation: MIR151A --> | chemosensitivity | 30102952 | 10.1016/j.canlet.2 |
| positive Regulation: MIR151A --> | chemosensitivity | 30917935 | 10.1016/j.ebiom.20 |
| positive Regulation: MIR151A --> | chemosensitivity | 30102952 | 10.1016/j.canlet.2 |
| positive Regulation: MIR151A --> | chemosensitivity | 33099951 |                    |
| positive Regulation: MIR151A --> | chemosensitivity | 33099951 |                    |
| positive Regulation: MIR151A --> | chemosensitivity |          | 10.1016/j.ebiom.20 |
| positive Regulation: MIR151A --> | chemosensitivity | 35232010 | 10.18388/abp.2020_ |
| positive Regulation: MIR151A --> | chemosensitivity | 35232010 | 10.18388/abp.2020_ |
| positive Regulation: MECP2 -->   | chemosensitivity | 27884797 | 10.1016/j.resp.201 |
| positive Regulation: MECP2 -->   | chemosensitivity | 22475461 | 10.1016/j.conb.201 |
| positive Regulation: MECP2 -->   | chemosensitivity | 21307341 | 10.1152/ajpcell.00 |
| positive Regulation: MECP2 -->   | chemosensitivity | 21307341 | 10.1152/ajpcell.00 |
| positive Regulation: MECP2 -->   | chemosensitivity | 21307341 | 10.1152/ajpcell.00 |
| positive Regulation: SALL4 -->   | chemosensitivity | 24012616 | 10.1016/j.jhep.201 |
| positive Regulation: SALL4 -->   | chemosensitivity | 28943937 | 10.3892/ol.2017.67 |
| positive Regulation: SALL4 -->   | chemosensitivity |          |                    |
| positive Regulation: CDK2AP1 --> | chemosensitivity | 30343278 | 10.21873/cgp.20103 |
| positive Regulation: CDK2AP1 --> | chemosensitivity | 23404055 | 10.3892/ijo.2013.1 |
| positive Regulation: CDK2AP1 --> | chemosensitivity | 23404055 | 10.3892/ijo.2013.1 |
| positive Regulation: CDK2AP1 --> | chemosensitivity | 23404055 | 10.3892/ijo.2013.1 |
| positive Regulation: CDK2AP1 --> | chemosensitivity | 23404055 | 10.3892/ijo.2013.1 |
| positive Regulation: CDK2AP1 --> | chemosensitivity | 23404055 | 10.3892/ijo.2013.1 |
| positive Regulation: CDK2AP1 --> | chemosensitivity | 23404055 | 10.3892/ijo.2013.1 |
| positive Regulation: CDK2AP1 --> | chemosensitivity | 23404055 | 10.3892/ijo.2013.1 |
| positive Regulation: ZBTB4 -->   | chemosensitivity | 29425745 | 10.1016/j.biopha.2 |
| positive Regulation: PDCD4 -->   | chemosensitivity | 26142886 | 10.1016/j.abb.2015 |
| positive Regulation: PDCD4 -->   | chemosensitivity | 26166769 | 10.1038/cmi.2015.4 |
| positive Regulation: PDCD4 -->   | chemosensitivity | 33650661 | 10.3892/or.2021.79 |
| positive Regulation: PDCD4 -->   | chemosensitivity | 23486359 | 10.4161/auto.24069 |
| positive Regulation: PDCD4 -->   | chemosensitivity | 23604124 | 10.1038/onc.2013.1 |
| positive Regulation: PDCD4 -->   | chemosensitivity | 20735432 | 10.1111/j.1349-700 |
| positive Regulation: PDCD4 -->   | chemosensitivity |          | 10.3892/or.2021.79 |
| positive Regulation: MIR16-1 --> | chemosensitivity | 30679313 | 10.1074/jbc.RA118. |
| positive Regulation: MIR16-1 --> | chemosensitivity | 32987354 | 10.1016/j.dnarep.2 |
| positive Regulation: MIR16-1 --> | chemosensitivity | 30679313 | 10.1074/jbc.RA118. |
| positive Regulation: MIR16-1 --> | chemosensitivity | 25945419 | 10.1080/15384047.2 |
| positive Regulation: MIR16-1 --> | chemosensitivity | 26383521 | 10.1007/s13277-015 |
| positive Regulation: MIR16-1 --> | chemosensitivity | 25945419 | 10.1080/15384047.2 |
| positive Regulation: MIR382 -->  | chemosensitivity | 31635836 | 10.1016/j.jss.2019 |
| positive Regulation: MIR382 -->  | chemosensitivity | 28982593 | 10.1016/j.bbamcr.2 |
| positive Regulation: MIR382 -->  | chemosensitivity | 27468717 | 10.1007/s13277-016 |
| positive Regulation: MIR382 -->  | chemosensitivity | 29700213 | 10.1042/BSR2018044 |

|                                        |                  |          |                    |
|----------------------------------------|------------------|----------|--------------------|
| positive Regulation: MIR382 -->        | chemosensitivity | 29700213 | 10.1042/BSR2018044 |
| positive Regulation: MIR382 -->        | chemosensitivity | 29700213 | 10.1042/BSR2018044 |
| positive Regulation: MIR382 -->        | chemosensitivity |          | 10.32604/biocell.2 |
| positive Regulation: MIR382 -->        | chemosensitivity | 25998694 | 10.3892/or.2015.39 |
| positive Regulation: MIR382 -->        | chemosensitivity | 25344865 | 10.18632/oncotarge |
| positive Regulation: MIR382 -->        | chemosensitivity | 29700213 | 10.1042/BSR2018044 |
| positive Regulation: MIR382 -->        | chemosensitivity | 29700213 | 10.1042/BSR2018044 |
| positive Regulation: MIR1207 -->       | chemosensitivity | 30341811 | 10.1002/1878-0261. |
| positive Regulation: PPIA -->          | chemosensitivity | 33121398 | 10.2174/0929867327 |
| positive Regulation: CCDC144NL-AS1 --> | chemosensitivity | 35083139 | 10.3389/fonc.2021. |
| positive Regulation: MIR920 -->        | chemosensitivity | 34633158 | 10.23736/S0026-480 |
| positive Regulation: UCHL1 -->         | chemosensitivity | 29080080 | 10.1007/s10555-017 |
| positive Regulation: UCHL1 -->         | chemosensitivity | 23499448 | 10.1016/j.celrep.2 |
| positive Regulation: CD24 -->          | chemosensitivity | 28866120 | 10.1016/j.imlet.20 |
| positive Regulation: CD24 -->          | chemosensitivity | 28179302 | 10.21873/anticanre |
| positive Regulation: CD24 -->          | chemosensitivity | 28179302 | 10.21873/anticanre |
| positive Regulation: CD24 -->          | chemosensitivity | 28179302 | 10.21873/anticanre |
| positive Regulation: CD24 -->          | chemosensitivity | 32124945 | 10.3892/ijo.2020.4 |
| positive Regulation: CD24 -->          | chemosensitivity | 32572883 | 10.26355/eurrev_20 |
| positive Regulation: CD24 -->          | chemosensitivity | 21960110 | 10.1007/s10549-011 |
| positive Regulation: CD24 -->          | chemosensitivity | 23852892 |                    |
| positive Regulation: CD24 -->          | chemosensitivity | 23852892 |                    |
| positive Regulation: CD24 -->          | chemosensitivity | 23852892 |                    |
| positive Regulation: CD24 -->          | chemosensitivity | 25308718 |                    |
| positive Regulation: CD24 -->          | chemosensitivity | 23852892 |                    |
| positive Regulation: CD24 -->          | chemosensitivity | 23852892 |                    |
| positive Regulation: CD24 -->          | chemosensitivity | 23852892 |                    |
| positive Regulation: CD24 -->          | chemosensitivity | 23852892 |                    |
| positive Regulation: CD24 -->          | chemosensitivity | 28179302 | 10.21873/anticanre |
| positive Regulation: CD24 -->          | chemosensitivity | 28179302 | 10.21873/anticanre |
| positive Regulation: CD24 -->          | chemosensitivity | 28179302 | 10.21873/anticanre |
| positive Regulation: MIR143 -->        | chemosensitivity | 29224950 | 10.1016/j.cca.2017 |
| positive Regulation: MIR143 -->        | chemosensitivity | 28242349 | 10.1016/j.bbcan.20 |
| positive Regulation: MIR143 -->        | chemosensitivity | 29879503 | 10.1016/j.gene.201 |
| positive Regulation: MIR143 -->        | chemosensitivity | 31704502 | 10.1016/j.biocel.2 |
| positive Regulation: MIR143 -->        | chemosensitivity | 25281917 | 10.1016/j.addr.201 |
| positive Regulation: MIR143 -->        | chemosensitivity | 31863330 | 10.1007/s11033-019 |
| positive Regulation: MIR143 -->        | chemosensitivity | 33077697 | 10.18632/aging.103 |
| positive Regulation: MIR143 -->        | chemosensitivity | 33569751 | 10.1007/s43032-021 |
| positive Regulation: MIR143 -->        | chemosensitivity | 33569751 | 10.1007/s43032-021 |
| positive Regulation: MIR143 -->        | chemosensitivity | 33569751 | 10.1007/s43032-021 |
| positive Regulation: MIR143 -->        | chemosensitivity | 33569751 | 10.1007/s43032-021 |
| positive Regulation: MIR143 -->        | chemosensitivity | 33569751 | 10.1007/s43032-021 |
| positive Regulation: MIR143 -->        | chemosensitivity | 33569751 | 10.1007/s43032-021 |
| positive Regulation: MIR143 -->        | chemosensitivity | 23383988 | 10.1186/1471-2407- |
| positive Regulation: MIR143 -->        | chemosensitivity | 23202889 | 10.3390/ijms131012 |
| positive Regulation: MIR143 -->        | chemosensitivity | 21197560 | 10.1007/s11010-010 |
| positive Regulation: MIR143 -->        | chemosensitivity | 23574723 | 10.4161/cc.24477   |
| positive Regulation: MIR143 -->        | chemosensitivity | 23574723 | 10.4161/cc.24477   |
| positive Regulation: MIR143 -->        | chemosensitivity | 23574723 | 10.4161/cc.24477   |
| positive Regulation: MIR143 -->        | chemosensitivity | 23574723 | 10.4161/cc.24477   |
| positive Regulation: MIR143 -->        | chemosensitivity | 23574723 | 10.4161/cc.24477   |
| positive Regulation: MIR143 -->        | chemosensitivity | 23574723 | 10.4161/cc.24477   |
| positive Regulation: MIR143 -->        | chemosensitivity | 24722758 | 10.1371/journal.po |
| positive Regulation: MIR143 -->        | chemosensitivity | 21197560 | 10.1007/s11010-010 |
| positive Regulation: MIR143 -->        | chemosensitivity | 23574723 | 10.4161/cc.2447710 |
| positive Regulation: MIR143 -->        | chemosensitivity | 28123579 | 10.3892/ol.2016.53 |

|                                                    |          |                    |
|----------------------------------------------------|----------|--------------------|
| positive Regulation: HCP5 --> chemosensitivity     | 33993846 | 10.1080/15384101.2 |
| positive Regulation: SHC1 --> chemosensitivity     | 31575671 | 10.3324/haematol.2 |
| positive Regulation: SHC1 --> chemosensitivity     | 30819907 | 10.3324/haematol.2 |
| positive Regulation: CDH1 --> chemosensitivity     | 16373333 |                    |
| positive Regulation: CDH1 --> chemosensitivity     | 28469776 |                    |
| positive Regulation: CDH1 --> chemosensitivity     | 22126395 | 10.1186/bcr3068    |
| positive Regulation: CDH1 --> chemosensitivity     | 24377525 | 10.7314/APJCP.2013 |
| positive Regulation: CDH1 --> chemosensitivity     | 24883070 | 10.1155/2014/73067 |
| positive Regulation: CDH1 --> chemosensitivity     | 26316041 | 10.3892/ijo.2015.3 |
| positive Regulation: CDH1 --> chemosensitivity     | 26316041 | 10.3892/ijo.2015.3 |
| positive Regulation: CDH1 --> chemosensitivity     | 26316041 | 10.3892/ijo.2015.3 |
| positive Regulation: CDH1 --> chemosensitivity     | 26316041 | 10.3892/ijo.2015.3 |
| positive Regulation: CDH1 --> chemosensitivity     | 26316041 | 10.3892/ijo.2015.3 |
| positive Regulation: CDH1 --> chemosensitivity     | 26316041 | 10.3892/ijo.2015.3 |
| positive Regulation: CDH1 --> chemosensitivity     | 26316041 | 10.3892/ijo.2015.3 |
| positive Regulation: CDH1 --> chemosensitivity     | 14532995 |                    |
| positive Regulation: CDH1 --> chemosensitivity     | 14532995 |                    |
| positive Regulation: CDH1 --> chemosensitivity     | 15361706 | 10.1159/000079141  |
| positive Regulation: MIR664A --> chemosensitivity  | 30896829 | 10.3892/ijo.2019.4 |
| positive Regulation: MIR145 --> chemosensitivity   | 32818543 | 10.1016/j.lfs.2020 |
| positive Regulation: MIR145 --> chemosensitivity   | 29627370 | 10.1016/j.addr.201 |
| positive Regulation: MIR145 --> chemosensitivity   | 31704502 | 10.1016/j.biocel.2 |
| positive Regulation: MIR145 --> chemosensitivity   | 32505000 | 10.1016/j.omtn.202 |
| positive Regulation: MIR145 --> chemosensitivity   | 26852750 | 10.1007/s13277-016 |
| positive Regulation: MIR145 --> chemosensitivity   | 30896792 | 10.3892/ijo.2019.4 |
| positive Regulation: MIR145 --> chemosensitivity   | 31582906 | 10.1186/s12935-019 |
| positive Regulation: MIR145 --> chemosensitivity   | 32339066 | 10.1177/0300060520 |
| positive Regulation: MIR145 --> chemosensitivity   | 32209033 | 10.2174/1566524020 |
| positive Regulation: MIR145 --> chemosensitivity   | 32209033 | 10.2174/1566524020 |
| positive Regulation: MIR145 --> chemosensitivity   | 30485503 | 10.1002/jcb.280791 |
| positive Regulation: MIR145 --> chemosensitivity   | 31440081 | 10.2147/CMAR.S2100 |
| positive Regulation: MIR145 --> chemosensitivity   | 31440081 | 10.2147/CMAR.S2100 |
| positive Regulation: MIR145 --> chemosensitivity   |          | 10.3892/ijo.2019.4 |
| positive Regulation: MIR145 --> chemosensitivity   |          | 10.1186/s12935-019 |
| positive Regulation: MIR145 --> chemosensitivity   | 34825319 | 10.1007/s11033-021 |
| positive Regulation: MIR145 --> chemosensitivity   | 34839317 | 10.1097/CM9.000000 |
| positive Regulation: SERPINB5 --> chemosensitivity | 28648644 | 10.1016/j.bbamcr.2 |
| positive Regulation: SERPINB5 --> chemosensitivity | 31732312 | 10.1016/j.amjoto.2 |
| positive Regulation: SERPINB5 --> chemosensitivity | 22076034 | 10.3892/ijmm.2011. |
| positive Regulation: SERPINB5 --> chemosensitivity | 23530500 |                    |
| positive Regulation: SERPINB5 --> chemosensitivity | 19906413 | 10.1016/j.ygyno.20 |
| positive Regulation: SERPINB5 --> chemosensitivity | 26733306 | 10.1186/s13046-015 |
| positive Regulation: SERPINB5 --> chemosensitivity | 26733306 | 10.1186/s13046-015 |
| positive Regulation: SERPINB5 --> chemosensitivity | 26733306 | 10.1186/s13046-015 |
| positive Regulation: SERPINB5 --> chemosensitivity |          | 10.1016/j.amjoto.2 |
| positive Regulation: CYP2C9 --> chemosensitivity   | 10991840 |                    |
| positive Regulation: DNMT3B --> chemosensitivity   | 35670956 | 10.1007/s13577-022 |
| positive Regulation: UPF1 --> chemosensitivity     | 34036905 | 10.2174/0929867328 |
| positive Regulation: GRM8 --> chemosensitivity     | 34950209 | 10.1155/2021/80020 |
| positive Regulation: GRM8 --> chemosensitivity     | 34950209 | 10.1155/2021/80020 |
| positive Regulation: HOPX --> chemosensitivity     | 28146149 | 10.1038/ncomms1405 |
| positive Regulation: HOPX --> chemosensitivity     | 28146149 | 10.1038/ncomms1405 |
| positive Regulation: HOPX --> chemosensitivity     | 28146149 | 10.1038/ncomms1405 |
| positive Regulation: HOPX --> chemosensitivity     | 28146149 | 10.1038/ncomms1405 |

|                                                   |          |                    |
|---------------------------------------------------|----------|--------------------|
| positive Regulation: HOPX --> chemosensitivity    | 33824475 | 10.1038/s41388-021 |
| positive Regulation: HOPX --> chemosensitivity    | 28146149 | 10.1038/ncomms1405 |
| positive Regulation: MIR337 --> chemosensitivity  | 28641487 | 10.1177/1010428317 |
| positive Regulation: SLC5A8 --> chemosensitivity  | 23167260 | 10.1042/BJ20121248 |
| positive Regulation: MIR383 --> chemosensitivity  | 30399596 | 10.1016/j.biopha.2 |
| positive Regulation: MIR383 --> chemosensitivity  | 30399596 | 10.1016/j.biopha.2 |
| positive Regulation: MIR383 --> chemosensitivity  | 31648164 | 10.1016/j.biopha.2 |
| positive Regulation: MIR383 --> chemosensitivity  | 31308851 | 10.1186/s11658-019 |
| positive Regulation: MIR383 --> chemosensitivity  |          | 10.1590/1414-431x2 |
| positive Regulation: MIR383 --> chemosensitivity  | 30399596 | 10.1016/j.biopha.2 |
| positive Regulation: MIR383 --> chemosensitivity  | 34440380 | 10.3390/genes12081 |
| positive Regulation: MIR383 --> chemosensitivity  | 34761351 | 10.1007/s12032-021 |
| positive Regulation: MIR383 --> chemosensitivity  | 34761351 | 10.1007/s12032-021 |
| positive Regulation: MIR383 --> chemosensitivity  | 34761351 | 10.1007/s12032-021 |
| positive Regulation: MIR383 --> chemosensitivity  | 34761351 | 10.1007/s12032-021 |
| positive Regulation: MIR383 --> chemosensitivity  | 34761351 | 10.1007/s12032-021 |
| positive Regulation: MIR383 --> chemosensitivity  | 34761351 | 10.1007/s12032-021 |
| positive Regulation: MIR383 --> chemosensitivity  | 34761351 | 10.1007/s12032-021 |
| positive Regulation: MIR383 --> chemosensitivity  | 34761351 | 10.1007/s12032-021 |
| positive Regulation: MIR383 --> chemosensitivity  | 35799305 | 10.1186/s13048-022 |
| positive Regulation: SPHK2 --> chemosensitivity   | 19240026 | 10.1074/jbc.M90073 |
| positive Regulation: SPHK2 --> chemosensitivity   | 19240026 |                    |
| positive Regulation: SPHK2 --> chemosensitivity   | 22469881 | 10.3892/or.2012.17 |
| positive Regulation: SPHK2 --> chemosensitivity   | 21707491 |                    |
| positive Regulation: SPHK2 --> chemosensitivity   | 26628299 | 10.1007/s13277-015 |
| positive Regulation: SPHK2 --> chemosensitivity   | 36066393 | 10.1097/CAD.000000 |
| positive Regulation: LAPTM5 --> chemosensitivity  | 35294039 | 10.3892/ijo.2022.5 |
| positive Regulation: LAPTM5 --> chemosensitivity  | 35294039 | 10.3892/ijo.2022.5 |
| positive Regulation: LAPTM5 --> chemosensitivity  | 35294039 | 10.3892/ijo.2022.5 |
| positive Regulation: ECRG4 --> chemosensitivity   | 23553029 | 10.1007/s13277-013 |
| positive Regulation: ECRG4 --> chemosensitivity   | 35464163 | 10.1007/s10616-022 |
| positive Regulation: ECRG4 --> chemosensitivity   | 35676661 | 10.1186/s12967-022 |
| positive Regulation: ECRG4 --> chemosensitivity   | 35676661 | 10.1186/s12967-022 |
| positive Regulation: ECRG4 --> chemosensitivity   | 35676661 | 10.1186/s12967-022 |
| positive Regulation: HMGA2 --> chemosensitivity   | 17222355 |                    |
| positive Regulation: HMGA2 --> chemosensitivity   |          | 10.3892/ijmm.2019. |
| positive Regulation: HMGA2 --> chemosensitivity   | 30543177 | 10.2174/1871520619 |
| positive Regulation: HMGA2 --> chemosensitivity   | 28954272 | 10.1159/0004816101 |
| positive Regulation: HMGA2 --> chemosensitivity   | 31067275 | 10.1371/journal.po |
| positive Regulation: HMGA2 --> chemosensitivity   | 31173171 | 10.3892/ijmm.2019. |
| positive Regulation: ABCF1 --> chemosensitivity   | 31100412 | 10.1016/j.canlet.2 |
| positive Regulation: IL2 --> chemosensitivity     | 23972545 | 10.1016/j.cyto.201 |
| positive Regulation: UGT1A1 --> chemosensitivity  | 25260839 | 10.1016/j.biopha.2 |
| positive Regulation: UGT1A1 --> chemosensitivity  | 25260839 | 10.1016/j.biopha.2 |
| positive Regulation: UGT1A1 --> chemosensitivity  | 25260839 | 10.1016/j.biopha.2 |
| positive Regulation: UGT1A1 --> chemosensitivity  | 25260839 | 10.1016/j.biopha.2 |
| positive Regulation: UGT1A1 --> chemosensitivity  | 25260839 | 10.1016/j.biopha.2 |
| positive Regulation: UGT1A1 --> chemosensitivity  | 25260839 | 10.1016/j.biopha.2 |
| positive Regulation: UGT1A1 --> chemosensitivity  | 30016963 | 10.1186/s12967-018 |
| positive Regulation: KISS1 --> chemosensitivity   | 22226740 | 10.1016/j.ajpath.2 |
| positive Regulation: KISS1 --> chemosensitivity   | 21383688 | 10.1038/onc.2011.3 |
| positive Regulation: RBM4 --> chemosensitivity    | 32187743 | 10.1002/jcla.23272 |
| positive Regulation: MIR146B --> chemosensitivity | 31546023 | 10.1016/j.canlet.2 |
| positive Regulation: MIR146B --> chemosensitivity | 33279671 | 10.1016/j.cellsig. |
| positive Regulation: MIR146B --> chemosensitivity | 31877405 | 10.1016/j.drug.201 |

|                                                    |          |                    |
|----------------------------------------------------|----------|--------------------|
| positive Regulation: MIR146B --> chemosensitivity  | 29048680 | 10.3892/or.2017.59 |
| positive Regulation: MIR146B --> chemosensitivity  | 29048680 | 10.3892/or.2017.59 |
| positive Regulation: MIR146B --> chemosensitivity  | 29048680 | 10.3892/or.2017.59 |
| positive Regulation: MIR146B --> chemosensitivity  | 30409964 | 10.1038/s41419-018 |
| positive Regulation: MIR146B --> chemosensitivity  | 30409964 | 10.1038/s41419-018 |
| positive Regulation: LNC-LBCS --> chemosensitivity | 30397178 | 10.1158/1078-0432. |
| positive Regulation: GGT5 --> chemosensitivity     | 32640421 | 10.18632/aging.103 |
| positive Regulation: TRIM21 --> chemosensitivity   | 34856418 | 10.1016/j.bbrc.202 |
| positive Regulation: MARVELD1 --> chemosensitivity | 23826386 | 10.1371/journal.po |
| positive Regulation: MARVELD1 --> chemosensitivity | 22320884 | 10.1111/j.1349-700 |
| positive Regulation: G3BP2 --> chemosensitivity    | 31461651 | 10.1016/j.celrep.2 |
| positive Regulation: H2AX --> chemosensitivity     | 26687759 | 10.1007/s13277-015 |
| positive Regulation: H2AX --> chemosensitivity     | 27006338 | 10.15252/emmm.2015 |
| positive Regulation: H2AX --> chemosensitivity     | 25487737 | 10.1038/ncomms6691 |
| positive Regulation: H2AX --> chemosensitivity     | 25487737 | 10.1038/ncomms6691 |
| positive Regulation: H2AX --> chemosensitivity     | 29435013 | 10.3892/o1.2017.76 |
| positive Regulation: MIR216B --> chemosensitivity  | 28373071 | 10.1016/j.bbrc.201 |
| positive Regulation: MIR216B --> chemosensitivity  | 32387443 | 10.1016/j.canlet.2 |
| positive Regulation: MIR216B --> chemosensitivity  | 29787989 | 10.1016/j.biopha.2 |
| positive Regulation: MIR216B --> chemosensitivity  | 30778048 | 10.1038/s41419-019 |
| positive Regulation: MIR216B --> chemosensitivity  | 32972441 | 10.1186/s13046-020 |
| positive Regulation: MIR216B --> chemosensitivity  | 28373071 | 10.1016/j.bbrc.201 |
| positive Regulation: MIR216B --> chemosensitivity  | 35152275 | 10.1038/s41374-022 |
| positive Regulation: RHOB --> chemosensitivity     | 21872591 | 10.1016/j.febslet. |
| positive Regulation: RHOB --> chemosensitivity     | 22982107 | 10.1016/j.febslet. |
| positive Regulation: RHOB --> chemosensitivity     | 23153558 | 10.1016/j.taap.201 |
| positive Regulation: RHOB --> chemosensitivity     | 20473933 | 10.1002/ijc.254451 |
| positive Regulation: MIR519A1 --> chemosensitivity | 34203727 | 10.3390/ijms221263 |
| positive Regulation: MIR519A1 --> chemosensitivity | 29843746 | 10.1186/s13045-018 |
| positive Regulation: MIR519A1 --> chemosensitivity | 34454479 | 10.1186/s12935-021 |
| positive Regulation: MIR519A1 --> chemosensitivity | 35432536 | 10.1155/2022/25000 |
| positive Regulation: MIR519A1 --> chemosensitivity | 35432536 | 10.1155/2022/25000 |
| positive Regulation: MIR519A1 --> chemosensitivity | 36354672 | 10.3390/cimb441103 |
| positive Regulation: MC4R --> chemosensitivity     | 33624805 | 10.1093/sleep/zsab |
| positive Regulation: MIR101-1 --> chemosensitivity | 33989708 | 10.1016/j.canlet.2 |
| positive Regulation: MIR101-1 --> chemosensitivity | 28242349 | 10.1016/j.bbcan.20 |
| positive Regulation: MIR101-1 --> chemosensitivity | 32119915 | 10.1016/j.gene.202 |
| positive Regulation: MIR101-1 --> chemosensitivity | 27155790 | 10.1016/j.molonc.2 |
| positive Regulation: MIR101-1 --> chemosensitivity |          | 10.1016/j.jss.2011 |
| positive Regulation: MIR101-1 --> chemosensitivity |          | 10.1016/j.jss.2011 |
| positive Regulation: MIR101-1 --> chemosensitivity | 28384067 | 10.1089/dna.2016.3 |
| positive Regulation: MIR101-1 --> chemosensitivity | 28560419 | 10.3892/or.2017.56 |
| positive Regulation: MIR101-1 --> chemosensitivity | 28933259 | 10.1177/1010428317 |
| positive Regulation: MIR101-1 --> chemosensitivity | 28079894 | 10.1038/cddis.2016 |
| positive Regulation: MIR101-1 --> chemosensitivity | 28950928 | 10.3727/096504017X |
| positive Regulation: MIR101-1 --> chemosensitivity | 30596336 | 10.1080/15384101.2 |
| positive Regulation: MIR101-1 --> chemosensitivity | 30249919 | 10.2176/nmc.ra.201 |
| positive Regulation: MIR101-1 --> chemosensitivity | 31298406 | 10.26355/eurrev_20 |
| positive Regulation: MIR101-1 --> chemosensitivity | 31638211 | 10.3892/ijo.2019.4 |
| positive Regulation: MIR101-1 --> chemosensitivity | 25013866 | 10.1155/2014/79475 |
| positive Regulation: MIR101-1 --> chemosensitivity | 25013866 | 10.1155/2014/79475 |
| positive Regulation: MIR101-1 --> chemosensitivity | 25153722 | 10.18632/oncotarge |
| positive Regulation: MIR101-1 --> chemosensitivity | 26628987 |                    |
| positive Regulation: MIR101-1 --> chemosensitivity |          | 10.3727/096504017X |

|                                   |                  |                             |
|-----------------------------------|------------------|-----------------------------|
| positive Regulation: MIR101-1 --> | chemosensitivity | 10.1080/15384101.2          |
| positive Regulation: MIR101-1 --> | chemosensitivity | 10.26355/eurrev_20          |
| positive Regulation: MIR101-1 --> | chemosensitivity | 10.3892/ijo.2019.4          |
| positive Regulation: MIR152 -->   | chemosensitivity | 31128298 10.1016/j.semcance |
| positive Regulation: MIR410 -->   | chemosensitivity | 33035835 10.1016/j.biopha.2 |
| positive Regulation: MIR410 -->   | chemosensitivity | 28138700 10.3892/mmr.2017.6 |
| positive Regulation: MIR410 -->   | chemosensitivity | 32323781 10.3892/or.2020.74 |
| positive Regulation: MIR223 -->   | chemosensitivity | 33310181 10.1016/j.ejphar.2 |
| positive Regulation: MIR223 -->   | chemosensitivity | 28322994 10.1016/j.gene.201 |
| positive Regulation: MIR223 -->   | chemosensitivity | 28322994 10.1016/j.gene.201 |
| positive Regulation: MIR223 -->   | chemosensitivity | 28322994 10.1016/j.gene.201 |
| positive Regulation: MIR223 -->   | chemosensitivity | 29518547 10.1016/j.gene.201 |
| positive Regulation: MIR223 -->   | chemosensitivity | 29518547 10.1016/j.gene.201 |
| positive Regulation: MIR223 -->   | chemosensitivity | 33865701 10.1016/j.semcd.2  |
| positive Regulation: MIR223 -->   | chemosensitivity | 27398136                    |
| positive Regulation: MIR223 -->   | chemosensitivity | 31991775 10.3390/ijms210307 |
| positive Regulation: MIR223 -->   | chemosensitivity | 29518547 10.1016/j.gene.201 |
| positive Regulation: MIR223 -->   | chemosensitivity | 29518547 10.1016/j.gene.201 |
| positive Regulation: MIR223 -->   | chemosensitivity | 34830408 10.3390/ijms222212 |
| positive Regulation: MIR223 -->   | chemosensitivity | 36052513 10.15252/embj.2021 |
| positive Regulation: MIR608 -->   | chemosensitivity | 32822816 10.1016/j.canlet.2 |
| positive Regulation: LEP -->      | chemosensitivity | 20609602 10.1016/j.smr.201  |
| positive Regulation: LEP -->      | chemosensitivity | 10.1016/S1389-9457          |
| positive Regulation: LEP -->      | chemosensitivity | 23201827 10.1016/j.neurosci |
| positive Regulation: LEP -->      | chemosensitivity | 23201827 10.1016/j.neurosci |
| positive Regulation: LEP -->      | chemosensitivity | 23541616 10.1016/j.brainres |
| positive Regulation: LEP -->      | chemosensitivity | 11834635 10.1378/chest.121. |
| positive Regulation: LEP -->      | chemosensitivity | 11834635                    |
| positive Regulation: LEP -->      | chemosensitivity | 32603263 10.1165/rcmb.2020- |
| positive Regulation: LEP -->      | chemosensitivity | 32603263 10.1165/rcmb.2020- |
| positive Regulation: LEP -->      | chemosensitivity | 33624805 10.1093/sleep/zsab |
| positive Regulation: LEP -->      | chemosensitivity | 34201760 10.3390/ijms221367 |
| positive Regulation: LEP -->      | chemosensitivity | 34131808 10.1007/s00018-021 |
| positive Regulation: LEP -->      | chemosensitivity | 31289528 10.3892/ol.2019.10 |
| positive Regulation: MIR302B -->  | chemosensitivity | 23845851 10.1016/j.toxlet.2 |
| positive Regulation: ZNF185 -->   | chemosensitivity | 32565799 10.1155/2020/31815 |
| positive Regulation: ZNF185 -->   | chemosensitivity | 32565799 10.1155/2020/31815 |
| positive Regulation: ZNF185 -->   | chemosensitivity | 32565799 10.1155/2020/31815 |
| positive Regulation: ZNF185 -->   | chemosensitivity | 32565799 10.1155/2020/31815 |
| positive Regulation: ZNF185 -->   | chemosensitivity | 32565799 10.1155/2020/31815 |
| positive Regulation: IPO7 -->     | chemosensitivity | 23178451 10.1016/j.canlet.2 |
| positive Regulation: MIR193B -->  | chemosensitivity | 22819820 10.1016/j.febslet. |
| positive Regulation: MIR193B -->  | chemosensitivity | 26878873 10.1186/s12885-016 |
| positive Regulation: MIR193B -->  | chemosensitivity | 26878873 10.1186/s12885-016 |
| positive Regulation: MIR193B -->  | chemosensitivity | 26878873 10.1186/s12885-016 |
| positive Regulation: MIR193B -->  | chemosensitivity | 26878873 10.1186/s12885-016 |
| positive Regulation: MIR193B -->  | chemosensitivity | 35575588 10.1080/15384101.2 |
| positive Regulation: CCL2 -->     | chemosensitivity | 35787939 10.1016/j.semcance |
| positive Regulation: MIR133A1 --> | chemosensitivity | 31651347 10.1186/s12943-019 |
| positive Regulation: PNMA5 -->    | chemosensitivity | 27424190 10.1007/s00432-016 |
| positive Regulation: PNMA5 -->    | chemosensitivity | 27424190 10.1007/s00432-016 |
| positive Regulation: PNMA5 -->    | chemosensitivity | 27424190 10.1007/s00432-016 |
| positive Regulation: PNMA5 -->    | chemosensitivity | 27424190 10.1007/s00432-016 |
| positive Regulation: PNMA5 -->    | chemosensitivity | 35559417                    |

|                                                     |          |                    |
|-----------------------------------------------------|----------|--------------------|
| positive Regulation: TET2 --> chemosensitivity      | 32355773 | 10.21037/atm.2020. |
| positive Regulation: MIRLET7D --> chemosensitivity  | 25281917 | 10.1016/j.addr.201 |
| positive Regulation: MIRLET7D --> chemosensitivity  | 29658612 | 10.3892/or.2018.63 |
| positive Regulation: MIRLET7D --> chemosensitivity  | 30816441 | 10.3892/ijo.2019.4 |
| positive Regulation: MIRLET7D --> chemosensitivity  | 30816441 | 10.3892/ijo.2019.4 |
| positive Regulation: MIRLET7D --> chemosensitivity  | 30816441 | 10.3892/ijo.2019.4 |
| positive Regulation: MIRLET7D --> chemosensitivity  | 30816441 | 10.3892/ijo.2019.4 |
| positive Regulation: MIRLET7D --> chemosensitivity  | 30816441 | 10.3892/ijo.2019.4 |
| positive Regulation: MIRLET7D --> chemosensitivity  | 30816441 | 10.3892/ijo.2019.4 |
| positive Regulation: MIRLET7D --> chemosensitivity  | 21725603 | 10.3892/or.2011.13 |
| positive Regulation: MIRLET7D --> chemosensitivity  | 23834156 | 10.2174/1389450111 |
| positive Regulation: MIRLET7D --> chemosensitivity  | 21725603 | 10.3892/or.2011.13 |
| positive Regulation: MIRLET7D --> chemosensitivity  | 33076802 | 10.2174/1381612826 |
| positive Regulation: MIRLET7D --> chemosensitivity  | 35715825 | 10.1186/s13048-022 |
| positive Regulation: MIRLET7D --> chemosensitivity  | 35864955 | 10.7150/ijbs.72952 |
| positive Regulation: LINC00161 --> chemosensitivity | 28499919 | 10.1016/j.bbamcr.2 |
| positive Regulation: LINC00161 --> chemosensitivity | 36539799 | 10.1186/s13046-022 |
| positive Regulation: NR3C1 --> chemosensitivity     | 34017210 | 10.1177/1179554921 |
| positive Regulation: MIR381 --> chemosensitivity    | 33137708 | 10.1016/j.tice.202 |
| positive Regulation: MIR381 --> chemosensitivity    | 32898724 | 10.1016/j.coph.202 |
| positive Regulation: MIR381 --> chemosensitivity    | 32763503 | 10.1016/j.tranon.2 |
| positive Regulation: MIR381 --> chemosensitivity    | 29048619 | 10.3892/or.2017.59 |
| positive Regulation: MIR381 --> chemosensitivity    | 29257334 | 10.3892/mmr.2017.8 |
| positive Regulation: MIR381 --> chemosensitivity    | 29257334 | 10.3892/mmr.2017.8 |
| positive Regulation: MIR381 --> chemosensitivity    | 31299041 | 10.12659/MSM.91552 |
| positive Regulation: MIR381 --> chemosensitivity    | 32763503 | 10.1016/j.tranon.2 |
| positive Regulation: MIR381 --> chemosensitivity    | 27612424 | 10.18632/oncotarge |
| positive Regulation: MIR381 --> chemosensitivity    | 29242506 | 10.1038/s41408-017 |
| positive Regulation: MIR381 --> chemosensitivity    |          | 10.12659/MSM.91552 |
| positive Regulation: SPARC --> chemosensitivity     | 33910127 | 10.1016/j.bbrc.202 |
| positive Regulation: SPARC --> chemosensitivity     | 33910127 | 10.1016/j.bbrc.202 |
| positive Regulation: SPARC --> chemosensitivity     | 33910127 | 10.1016/j.bbrc.202 |
| positive Regulation: SPARC --> chemosensitivity     | 33910127 | 10.1016/j.bbrc.202 |
| positive Regulation: SPARC --> chemosensitivity     | 17897953 | 10.1074/jbc.M70445 |
| positive Regulation: SPARC --> chemosensitivity     | 18992864 | 10.1016/j.ajog.200 |
| positive Regulation: SPARC --> chemosensitivity     | 18992864 | 10.1016/j.ajog.200 |
| positive Regulation: SPARC --> chemosensitivity     | 18992864 | 10.1016/j.ajog.200 |
| positive Regulation: SPARC --> chemosensitivity     | 18992864 | 10.1016/j.ajog.200 |
| positive Regulation: SPARC --> chemosensitivity     | 18849185 | 10.1016/j.drug.200 |
| positive Regulation: SPARC --> chemosensitivity     | 18849185 | 10.1016/j.drug.200 |
| positive Regulation: SPARC --> chemosensitivity     | 25064829 | 10.1016/j.matbio.2 |
| positive Regulation: SPARC --> chemosensitivity     | 15902309 |                    |
| positive Regulation: SPARC --> chemosensitivity     | 17897953 |                    |
| positive Regulation: SPARC --> chemosensitivity     | 32595212 | 10.1038/s41416-020 |
| positive Regulation: SPARC --> chemosensitivity     | 22480225 | 10.1186/1476-4598- |
| positive Regulation: SPARC --> chemosensitivity     | 22069448 | 10.1371/journal.po |
| positive Regulation: SPARC --> chemosensitivity     | 24309322 | 10.1038/modpathol. |
| positive Regulation: SPARC --> chemosensitivity     | 26358255 | 10.1007/s13277-015 |
| positive Regulation: SPARC --> chemosensitivity     | 26358255 | 10.1007/s13277-015 |
| positive Regulation: SPARC --> chemosensitivity     | 25030587 |                    |
| positive Regulation: SPARC --> chemosensitivity     | 25030587 |                    |
| positive Regulation: SPARC --> chemosensitivity     | 25030587 |                    |
| positive Regulation: SPARC --> chemosensitivity     | 26358255 | 10.1007/s13277-015 |
| positive Regulation: SPARC --> chemosensitivity     | 26358255 | 10.1007/s13277-015 |

|                                                     |          |                    |
|-----------------------------------------------------|----------|--------------------|
| positive Regulation: SPARC --> chemosensitivity     | 33910127 | 10.1016/j.bbrc.202 |
| positive Regulation: SPARC --> chemosensitivity     | 33910127 | 10.1016/j.bbrc.202 |
| positive Regulation: SPARC --> chemosensitivity     |          |                    |
| positive Regulation: SPARC --> chemosensitivity     | 36157225 | 10.1155/2022/79615 |
| positive Regulation: MIR196A1 --> chemosensitivity  | 23570052 |                    |
| positive Regulation: MIR196A1 --> chemosensitivity  | 26062455 | 10.3892/or.2015.40 |
| positive Regulation: MIR196A1 --> chemosensitivity  | 26936095 | 10.3892/ijmm.2016. |
| positive Regulation: MIR196A1 --> chemosensitivity  | 26376998 | 10.1007/s13277-015 |
| positive Regulation: MIR196A1 --> chemosensitivity  | 25571061 | 10.1109/EMBC.2014. |
| positive Regulation: MIR1-1 --> chemosensitivity    | 30551491 | 10.1016/j.biopha.2 |
| positive Regulation: MIR1-1 --> chemosensitivity    | 28358371 | 10.1038/cddis.2017 |
| positive Regulation: MIR1-1 --> chemosensitivity    | 29851226 | 10.1002/cbin.10995 |
| positive Regulation: MIR1-1 --> chemosensitivity    | 33277838 |                    |
| positive Regulation: MIR1-1 --> chemosensitivity    | 33277838 |                    |
| positive Regulation: COL12A1 --> chemosensitivity   | 26843134 | 10.1620/tjem.238.1 |
| positive Regulation: LITAF --> chemosensitivity     | 26716897 | 10.18632/oncotarge |
| positive Regulation: MIR637 --> chemosensitivity    | 31631038 | 10.1016/j.ebiom.20 |
| positive Regulation: MIR637 --> chemosensitivity    | 31631038 | 10.1016/j.ebiom.20 |
| positive Regulation: LINC01963 --> chemosensitivity | 35152275 | 10.1038/s41374-022 |
| positive Regulation: LINC01963 --> chemosensitivity | 35152275 | 10.1038/s41374-022 |
| positive Regulation: LINC01963 --> chemosensitivity | 35152275 | 10.1038/s41374-022 |
| positive Regulation: LINC01963 --> chemosensitivity | 35152275 | 10.1038/s41374-022 |
| positive Regulation: LINC01963 --> chemosensitivity | 35152275 | 10.1038/s41374-022 |
| positive Regulation: LINC01963 --> chemosensitivity | 35152275 | 10.1038/s41374-022 |
| positive Regulation: LINC01963 --> chemosensitivity | 35152275 | 10.1038/s41374-022 |
| positive Regulation: IFNG --> chemosensitivity      | 17627812 | 10.1016/j.ejca.200 |
| positive Regulation: IFNG --> chemosensitivity      | 33194045 |                    |
| positive Regulation: IFNG --> chemosensitivity      | 21327638 | 10.1007/s00262-011 |
| positive Regulation: STK31 --> chemosensitivity     | 30144069 | 10.1002/jcp.270791 |
| positive Regulation: GJB1 --> chemosensitivity      | 31213923 | 10.2147/CMAR.S2036 |
| positive Regulation: MIR302A --> chemosensitivity   | 33865878 | 10.1016/j.lfs.2021 |
| positive Regulation: MIR302A --> chemosensitivity   | 26644266 | 10.1016/j.ygyno.20 |
| positive Regulation: MIR302A --> chemosensitivity   | 28922711 | 10.1016/j.biopha.2 |
| positive Regulation: MIR302A --> chemosensitivity   | 26644266 | 10.1016/j.ygyno.20 |
| positive Regulation: PTEN --> chemosensitivity      | 24434152 | 10.1016/j.bbrc.201 |
| positive Regulation: PTEN --> chemosensitivity      | 11729185 | 10.1074/jbc.M10830 |
| positive Regulation: PTEN --> chemosensitivity      | 11495901 | 10.1074/jbc.M10363 |
| positive Regulation: PTEN --> chemosensitivity      | 11495901 | 10.1074/jbc.M10363 |
| positive Regulation: PTEN --> chemosensitivity      | 11495901 | 10.1074/jbc.M10363 |
| positive Regulation: PTEN --> chemosensitivity      | 11495901 | 10.1074/jbc.M10363 |
| positive Regulation: PTEN --> chemosensitivity      | 27721020 | 10.1016/j.canlet.2 |
| positive Regulation: PTEN --> chemosensitivity      | 33220333 | 10.1016/j.canlet.2 |
| positive Regulation: PTEN --> chemosensitivity      | 32827577 | 10.1016/j.bbcan.20 |
| positive Regulation: PTEN --> chemosensitivity      | 28755993 | 10.1016/j.ijpharm. |
| positive Regulation: PTEN --> chemosensitivity      | 21187093 | 10.1016/j.febslet. |
| positive Regulation: PTEN --> chemosensitivity      | 22465665 | 10.1016/j.febslet. |
| positive Regulation: PTEN --> chemosensitivity      | 16545436 | 10.1016/j.ygyno.20 |
| positive Regulation: PTEN --> chemosensitivity      | 15072831 | 10.1016/j.canlet.2 |
| positive Regulation: PTEN --> chemosensitivity      | 15072831 | 10.1016/j.canlet.2 |
| positive Regulation: PTEN --> chemosensitivity      | 23920276 | 10.1016/j.phymed.2 |
| positive Regulation: PTEN --> chemosensitivity      | 25744176 | 10.1016/j.drudis.2 |
| positive Regulation: PTEN --> chemosensitivity      | 21108789 |                    |
| positive Regulation: PTEN --> chemosensitivity      | 21108789 |                    |
| positive Regulation: PTEN --> chemosensitivity      | 19299556 |                    |



|                                   |                  |                                |
|-----------------------------------|------------------|--------------------------------|
| positive Regulation: PTEN -->     | chemosensitivity | 11729185                       |
| positive Regulation: PTEN -->     | chemosensitivity | 11495901                       |
| positive Regulation: PTEN -->     | chemosensitivity | 11495901                       |
| positive Regulation: PTEN -->     | chemosensitivity | 11495901                       |
| positive Regulation: PTEN -->     | chemosensitivity | 11495901                       |
| positive Regulation: PTEN -->     | chemosensitivity | 18458673                       |
| positive Regulation: PTEN -->     | chemosensitivity | 16404430                       |
| positive Regulation: PTEN -->     | chemosensitivity | 11103942                       |
| positive Regulation: PTEN -->     | chemosensitivity | 28887606 10. 1007/s10616-017   |
| positive Regulation: PTEN -->     | chemosensitivity | 30616477 10. 1177/0300060518   |
| positive Regulation: PTEN -->     | chemosensitivity | 33076450 10. 3390/i jms212076  |
| positive Regulation: PTEN -->     | chemosensitivity | 33721218 10. 1007/s13577-021   |
| positive Regulation: PTEN -->     | chemosensitivity | 33721218 10. 1007/s13577-021   |
| positive Regulation: PTEN -->     | chemosensitivity | 33721218 10. 1007/s13577-021   |
| positive Regulation: PTEN -->     | chemosensitivity | 33721218 10. 1007/s13577-021   |
| positive Regulation: PTEN -->     | chemosensitivity | 33721218 10. 1007/s13577-021   |
| positive Regulation: PTEN -->     | chemosensitivity | 33721218 10. 1007/s13577-021   |
| positive Regulation: PTEN -->     | chemosensitivity | 21108789 10. 1186/1476-4598-   |
| positive Regulation: PTEN -->     | chemosensitivity | 21108789 10. 1186/1476-4598-   |
| positive Regulation: PTEN -->     | chemosensitivity | 20736773 10. 1097/PGP. 0b013e  |
| positive Regulation: PTEN -->     | chemosensitivity | 26043084 10. 1371/journal. po  |
| positive Regulation: PTEN -->     | chemosensitivity | 11103942 10. 1038/sj. onc. 120 |
| positive Regulation: PTEN -->     | chemosensitivity | 16404430 10. 1038/sj. bjc. 660 |
| positive Regulation: PTEN -->     | chemosensitivity | 16438844                       |
| positive Regulation: PTEN -->     | chemosensitivity | 21820606 10. 1016/j. arcmed. 2 |
| positive Regulation: PTEN -->     | chemosensitivity | 28686971 10. 1016/j. biopha. 2 |
| positive Regulation: PTEN -->     | chemosensitivity | 30925916 10. 1186/s13046-019   |
| positive Regulation: PTEN -->     | chemosensitivity | 33721218 10. 1007/s13577-021   |
| positive Regulation: PTEN -->     | chemosensitivity | 10. 1016/j. febslet.           |
| positive Regulation: PTEN -->     | chemosensitivity | 10. 1177/0300060518            |
| positive Regulation: PTEN -->     | chemosensitivity | 27147467 10. 1007/s00018-016   |
| positive Regulation: PTEN -->     | chemosensitivity | 22781804                       |
| positive Regulation: PTEN -->     | chemosensitivity | 27955382                       |
| positive Regulation: PTEN -->     | chemosensitivity | 34681603 10. 3390/i jms222010  |
| positive Regulation: MIR495 -->   | chemosensitivity | 33892053 10. 1016/j. bbcan. 20 |
| positive Regulation: MIR495 -->   | chemosensitivity | 33892053 10. 1016/j. bbcan. 20 |
| positive Regulation: MIR495 -->   | chemosensitivity | 27075472 10. 1007/s13277-016   |
| positive Regulation: MIR495 -->   | chemosensitivity | 30147110 10. 12659/MSM. 90945  |
| positive Regulation: MIR495 -->   | chemosensitivity | 30147110 10. 12659/MSM. 90945  |
| positive Regulation: MIR495 -->   | chemosensitivity | 30147110 10. 12659/MSM. 90945  |
| positive Regulation: MIR495 -->   | chemosensitivity | 30147110 10. 12659/MSM. 90945  |
| positive Regulation: MIR495 -->   | chemosensitivity | 30147110 10. 12659/MSM. 90945  |
| positive Regulation: MIR495 -->   | chemosensitivity | 30147110 10. 12659/MSM. 90945  |
| positive Regulation: MIR495 -->   | chemosensitivity | 30147110 10. 12659/MSM. 90945  |
| positive Regulation: MIR495 -->   | chemosensitivity | 30147110 10. 12659/MSM. 90945  |
| positive Regulation: MIR124-1 --> | chemosensitivity | 28242198 10. 1016/j. bbrc. 201 |
| positive Regulation: MIR124-1 --> | chemosensitivity | 33358904 10. 1016/j. lfs. 2020 |
| positive Regulation: MIR124-1 --> | chemosensitivity | 28163106 10. 1016/j. addr. 201 |
| positive Regulation: MIR124-1 --> | chemosensitivity | 32382656 10. 1016/j. omt0. 202 |
| positive Regulation: MIR124-1 --> | chemosensitivity | 32382656 10. 1016/j. omt0. 202 |
| positive Regulation: MIR124-1 --> | chemosensitivity | 32382656 10. 1016/j. omt0. 202 |
| positive Regulation: MIR124-1 --> | chemosensitivity | 25281917 10. 1016/j. addr. 201 |
| positive Regulation: MIR124-1 --> | chemosensitivity | 29185191 10. 1007/s12015-017   |
| positive Regulation: MIR124-1 --> | chemosensitivity | 29185191 10. 1007/s12015-017   |
| positive Regulation: MIR124-1 --> | chemosensitivity | 29185191 10. 1007/s12015-017   |
| positive Regulation: MIR124-1 --> | chemosensitivity | 30657585 10. 26355/eurrev_20   |

|                                   |                  |          |                    |
|-----------------------------------|------------------|----------|--------------------|
| positive Regulation: MIR124-1 --> | chemosensitivity | 32096187 | 10.26355/eurrev_20 |
| positive Regulation: MIR124-1 --> | chemosensitivity | 24861879 | 10.1093/neuonc/nou |
| positive Regulation: MIR124-1 --> | chemosensitivity | 24861879 | 10.1093/neuonc/nou |
| positive Regulation: MIR124-1 --> | chemosensitivity | 28242198 | 10.1016/j.bbrc.201 |
| positive Regulation: MIR124-1 --> | chemosensitivity | 28242198 | 10.1016/j.bbrc.201 |
| positive Regulation: MIR124-1 --> | chemosensitivity | 28242198 | 10.1016/j.bbrc.201 |
| positive Regulation: MIR124-1 --> | chemosensitivity | 29185191 | 10.1007/s12015-017 |
| positive Regulation: MIR124-1 --> | chemosensitivity | 29185191 | 10.1007/s12015-017 |
| positive Regulation: MIR124-1 --> | chemosensitivity | 29185191 | 10.1007/s12015-017 |
| positive Regulation: MIR124-1 --> | chemosensitivity |          | 10.26355/eurrev_20 |
| positive Regulation: MIR124-1 --> | chemosensitivity |          |                    |
| positive Regulation: MIR124-1 --> | chemosensitivity |          |                    |
| positive Regulation: MIR124-1 --> | chemosensitivity | 28242198 | 10.1016/j.bbrc.201 |
| positive Regulation: MIR124-1 --> | chemosensitivity | 33886036 | 10.1007/s10571-021 |
| positive Regulation: RASA1 -->    | chemosensitivity | 33968197 | 10.3892/ol.2021.12 |
| positive Regulation: MIRLET7C --> | chemosensitivity | 33539818 | 10.1016/j.ejphar.2 |
| positive Regulation: MIRLET7C --> | chemosensitivity | 28571552 | 10.2174/1381612823 |
| positive Regulation: MIRLET7C --> | chemosensitivity | 25951903 | 10.1186/s12957-015 |
| positive Regulation: MIRLET7C --> | chemosensitivity | 29582468 | 10.1111/jop.127111 |
| positive Regulation: MIRLET7C --> | chemosensitivity | 34603447 | 10.1155/2021/56706 |
| positive Regulation: MIRLET7C --> | chemosensitivity |          |                    |
| positive Regulation: TP53BP2 -->  | chemosensitivity |          | 10.1016/j.gendis.2 |
| positive Regulation: MIRLET7G --> | chemosensitivity | 25972194 |                    |
| positive Regulation: MIR556 -->   | chemosensitivity | 34936303 | 10.1615/JEnvironPa |
| positive Regulation: EMP3 -->     | chemosensitivity | 34511602 | 10.1038/s41419-021 |
| positive Regulation: EMP3 -->     | chemosensitivity | 34511602 | 10.1038/s41419-021 |
| positive Regulation: EMP3 -->     | chemosensitivity | 34511602 | 10.1038/s41419-021 |
| positive Regulation: SPOP -->     | chemosensitivity | 36198437 | 10.1136/jitc-2022- |
| positive Regulation: NOS2 -->     | chemosensitivity | 20338478 | 10.1016/j.ijrobp.2 |
| positive Regulation: PHF19 -->    | chemosensitivity | 30323224 | 10.1038/s41419-018 |
| positive Regulation: PHF19 -->    | chemosensitivity | 30323224 | 10.1038/s41419-018 |
| positive Regulation: CDR1-AS -->  | chemosensitivity | 31542615 | 10.1016/j.biopha.2 |
| positive Regulation: CDR1-AS -->  | chemosensitivity | 31479922 | 10.1016/j.omtn.201 |
| positive Regulation: CDR1-AS -->  | chemosensitivity | 31542615 | 10.1016/j.biopha.2 |
| positive Regulation: CDR1-AS -->  | chemosensitivity | 31479922 | 10.1016/j.omtn.201 |
| positive Regulation: CDR1-AS -->  | chemosensitivity | 31479922 | 10.1016/j.omtn.201 |
| positive Regulation: CDR1-AS -->  | chemosensitivity | 31479922 | 10.1016/j.omtn.201 |
| positive Regulation: CDR1-AS -->  | chemosensitivity | 32655321 | 10.1186/s12935-020 |
| positive Regulation: CDR1-AS -->  | chemosensitivity | 30884120 | 10.1111/jcmm.14171 |
| positive Regulation: CDR1-AS -->  | chemosensitivity | 31131537 | 10.1002/1878-0261. |
| positive Regulation: CDR1-AS -->  | chemosensitivity | 31131537 | 10.1002/1878-0261. |
| positive Regulation: CDR1-AS -->  | chemosensitivity | 34400888 | 10.7150/IJMS.62219 |
| positive Regulation: CDR1-AS -->  | chemosensitivity | 35133881 | 10.1089/cbr.2021.0 |
| positive Regulation: BBC3 -->     | chemosensitivity | 33139695 | 10.1038/s41419-020 |
| positive Regulation: BBC3 -->     | chemosensitivity | 21863213 | 10.2119/molmed.201 |
| positive Regulation: BBC3 -->     | chemosensitivity | 21863213 | 10.2119/molmed.201 |
| positive Regulation: BBC3 -->     | chemosensitivity | 21863213 | 10.2119/molmed.201 |
| positive Regulation: BBC3 -->     | chemosensitivity | 22312312 | 10.3390/ijms130111 |
| positive Regulation: BBC3 -->     | chemosensitivity | 26698248 |                    |
| positive Regulation: BBC3 -->     | chemosensitivity | 16481741 | 10.4161/cbt.5.4.24 |
| positive Regulation: BBC3 -->     | chemosensitivity | 36595102 | 10.1007/s12672-022 |
| positive Regulation: BBC3 -->     | chemosensitivity | 36595102 | 10.1007/s12672-022 |
| positive Regulation: CRYAB -->    | chemosensitivity | 28648665 | 10.1016/j.ymthe.20 |
| positive Regulation: SMAD4 -->    | chemosensitivity | 23298711 | 10.1016/j.ejca.201 |



|                                   |                  |          |                    |
|-----------------------------------|------------------|----------|--------------------|
| positive Regulation: TFAP2A -->   | chemosensitivity | 21489314 | 10.1186/1471-2407- |
| positive Regulation: TFAP2A -->   | chemosensitivity | 22194984 | 10.1371/journal.po |
| positive Regulation: TFAP2A -->   | chemosensitivity | 22194984 | 10.1371/journal.po |
| positive Regulation: TFAP2A -->   | chemosensitivity | 19672266 | 10.1038/sj.bjc.660 |
| positive Regulation: TFAP2A -->   | chemosensitivity | 22194984 | 10.1371/journal.po |
| positive Regulation: UNC5C -->    | chemosensitivity | 21600761 | 10.1016/j.ejca.201 |
| positive Regulation: UNC5C -->    | chemosensitivity | 21600761 | 10.1016/j.ejca.201 |
| positive Regulation: UNC5C -->    | chemosensitivity | 21600761 | 10.1016/j.ejca.201 |
| positive Regulation: UNC5C -->    | chemosensitivity | 21600761 | 10.1016/j.ejca.201 |
| positive Regulation: UNC5C -->    | chemosensitivity | 21600761 | 10.1016/j.ejca.201 |
| positive Regulation: UPRT -->     | chemosensitivity | 11094317 | 10.1016/S0959-8049 |
| positive Regulation: MIR939 -->   | chemosensitivity | 30825424 | 10.1016/j.clinbioc |
| positive Regulation: MIR939 -->   | chemosensitivity | 31545400 | 10.3892/ijmm.2019. |
| positive Regulation: MIR939 -->   | chemosensitivity | 28114937 | 10.1186/s12943-017 |
| positive Regulation: MIR208B -->  | chemosensitivity | 33905821 | 10.1016/j.ymthe.20 |
| positive Regulation: MIR208B -->  | chemosensitivity | 33905821 | 10.1016/j.ymthe.20 |
| positive Regulation: MIR195 -->   | chemosensitivity | 32898724 | 10.1016/j.coph.202 |
| positive Regulation: MIR195 -->   | chemosensitivity | 31508486 | 10.1016/j.omto.201 |
| positive Regulation: MIR195 -->   | chemosensitivity | 31508486 | 10.1016/j.omto.201 |
| positive Regulation: MIR195 -->   | chemosensitivity | 31508486 | 10.1016/j.omto.201 |
| positive Regulation: MIR195 -->   | chemosensitivity | 28901478 | 10.3892/mmr.2017.7 |
| positive Regulation: MIR195 -->   | chemosensitivity | 28901478 | 10.3892/mmr.2017.7 |
| positive Regulation: MIR195 -->   | chemosensitivity | 29863237 |                    |
| positive Regulation: MIR195 -->   | chemosensitivity | 30200804 | 10.1080/15384101.2 |
| positive Regulation: MIR195 -->   | chemosensitivity | 28969047 | 10.18632/oncotarge |
| positive Regulation: MIR195 -->   | chemosensitivity | 29635904 | 10.1016/j.biopha.2 |
| positive Regulation: MIR195 -->   | chemosensitivity | 33953601 | 10.2147/PGPM.S3027 |
| positive Regulation: MIR195 -->   | chemosensitivity | 33953601 | 10.2147/PGPM.S3027 |
| positive Regulation: MIR195 -->   | chemosensitivity | 34440380 | 10.3390/genes12081 |
| positive Regulation: NR1H2 -->    | chemosensitivity |          | 10.1016/j.gendis.2 |
| positive Regulation: NR1H2 -->    | chemosensitivity | 31210377 | 10.1002/jcb.285581 |
| positive Regulation: NR1H2 -->    | chemosensitivity | 31210377 | 10.1002/jcb.285581 |
| positive Regulation: ALKBH5 -->   | chemosensitivity | 33376625 | 10.1016/j.omtn.202 |
| positive Regulation: ALKBH5 -->   | chemosensitivity |          | 10.1016/j.apsb.202 |
| positive Regulation: ALKBH5 -->   | chemosensitivity | 33376625 | 10.1016/j.omtn.202 |
| positive Regulation: ALKBH5 -->   | chemosensitivity | 36471428 | 10.1186/s13046-022 |
| positive Regulation: MIR1294 -->  | chemosensitivity | 29949161 | 10.26355/eurrev-20 |
| positive Regulation: MIR1294 -->  | chemosensitivity | 30536306 | 10.26355/eurrev-20 |
| positive Regulation: MIR1294 -->  | chemosensitivity | 31114997 | 10.26355/eurrev_20 |
| positive Regulation: MIR1294 -->  | chemosensitivity | 32329296 | 10.23812/20-10A    |
| positive Regulation: MIR1294 -->  | chemosensitivity | 29511599 |                    |
| positive Regulation: MIR1294 -->  | chemosensitivity | 29511599 |                    |
| positive Regulation: MIR33A -->   | chemosensitivity | 25971209 | 10.18632/oncotarge |
| positive Regulation: MIR328 -->   | chemosensitivity | 29627370 | 10.1016/j.addr.201 |
| positive Regulation: MIR328 -->   | chemosensitivity | 31193825 | 10.1016/j.apsb.201 |
| positive Regulation: SAA1 -->     | chemosensitivity | 25442283 | 10.1016/j.phymed.2 |
| positive Regulation: SAA1 -->     | chemosensitivity | 26176734 | 10.1080/15384047.2 |
| positive Regulation: GDPD5 -->    | chemosensitivity | 29635904 | 10.1016/j.biopha.2 |
| positive Regulation: GDPD5 -->    | chemosensitivity | 29635904 | 10.1016/j.biopha.2 |
| positive Regulation: AMOT -->     | chemosensitivity | 33414519 | 10.1038/s41417-020 |
| positive Regulation: AMOT -->     | chemosensitivity | 33414519 | 10.1038/s41417-020 |
| positive Regulation: ARL11 -->    | chemosensitivity | 21153650 | 10.1007/s00404-010 |
| positive Regulation: MIR612 -->   | chemosensitivity | 24704424 | 10.1016/j.bbrc.201 |
| positive Regulation: MIR194-1 --> | chemosensitivity | 27810403 | 10.1016/j.canlet.2 |

|                                    |                  |          |                    |
|------------------------------------|------------------|----------|--------------------|
| positive Regulation: MIR194-1 -->  | chemosensitivity | 26909612 | 10.18632/oncotarge |
| positive Regulation: MIR485 -->    | chemosensitivity | 29678577 | 10.1016/j.bbrc.201 |
| positive Regulation: MIR485 -->    | chemosensitivity | 29678577 | 10.1016/j.bbrc.201 |
| positive Regulation: MIR485 -->    | chemosensitivity | 29678577 | 10.1016/j.bbrc.201 |
| positive Regulation: MIR485 -->    | chemosensitivity | 29678577 | 10.1016/j.bbrc.201 |
| positive Regulation: MIR485 -->    | chemosensitivity | 31493469 | 10.1016/j.biochi.2 |
| positive Regulation: MIR485 -->    | chemosensitivity |          | 10.1016/j.sjbs.202 |
| positive Regulation: MIR485 -->    | chemosensitivity | 29678577 | 10.1016/j.bbrc.201 |
| positive Regulation: MIR485 -->    | chemosensitivity | 29678577 | 10.1016/j.bbrc.201 |
| positive Regulation: MIR485 -->    | chemosensitivity | 29678577 | 10.1016/j.bbrc.201 |
| positive Regulation: MIR485 -->    | chemosensitivity | 29678577 | 10.1016/j.bbrc.201 |
| positive Regulation: MIR485 -->    | chemosensitivity | 35235157 | 10.1007/s11033-022 |
| positive Regulation: TNF -->       | chemosensitivity | 31733340 | 10.1016/j.resp.201 |
| positive Regulation: TNF -->       | chemosensitivity | 23972545 | 10.1016/j.cyto.201 |
| positive Regulation: TNF -->       | chemosensitivity | 31364751 | 10.3892/or.2019.72 |
| positive Regulation: TNF -->       | chemosensitivity | 29564744 | 10.1007/s12253-018 |
| positive Regulation: TNF -->       | chemosensitivity | 21990224 | 10.1002/hed.216481 |
| positive Regulation: TNF -->       | chemosensitivity |          | 10.3892/or.2019.72 |
| positive Regulation: TNF -->       | chemosensitivity |          |                    |
| positive Regulation: TNF -->       | chemosensitivity | 34657251 | 10.1007/s11033-021 |
| positive Regulation: MIR204 -->    | chemosensitivity | 34015412 | 10.1016/j.bbcan.20 |
| positive Regulation: MIR204 -->    | chemosensitivity | 29353201 | 10.1016/j.biopha.2 |
| positive Regulation: MIR204 -->    | chemosensitivity | 28861151 |                    |
| positive Regulation: MIR204 -->    | chemosensitivity | 30566393 | 10.1152/ajpcell.00 |
| positive Regulation: MIR204 -->    | chemosensitivity | 31384174 | 10.1186/s12935-019 |
| positive Regulation: MIR204 -->    | chemosensitivity | 27095441 | 10.1242/bio.015008 |
| positive Regulation: MIR204 -->    | chemosensitivity | 28280358 | 10.2147/OTT.S12881 |
| positive Regulation: MIR204 -->    | chemosensitivity | 28861151 |                    |
| positive Regulation: MIR204 -->    | chemosensitivity | 32618144 | 10.1002/cam4.32481 |
| positive Regulation: MIR204 -->    | chemosensitivity | 35163397 | 10.3390/ijms230314 |
| positive Regulation: LINC00261 --> | chemosensitivity | 30226808 | 10.1096/fj.2018007 |
| positive Regulation: LINC00261 --> | chemosensitivity | 30226808 | 10.1096/fj.2018007 |
| positive Regulation: LINC00261 --> | chemosensitivity | 30226808 | 10.1096/fj.2018007 |
| positive Regulation: LINC00261 --> | chemosensitivity | 30226808 | 10.1096/fj.2018007 |
| positive Regulation: LINC00261 --> | chemosensitivity | 32744688 | 10.26355/eurrev_20 |
| positive Regulation: LINC00261 --> | chemosensitivity | 34424120 | 10.1080/15384101.2 |
| positive Regulation: LINC00261 --> | chemosensitivity | 34424120 | 10.1080/15384101.2 |
| positive Regulation: MIR625 -->    | chemosensitivity | 30988674 | 10.1186/s11658-019 |
| positive Regulation: MIR625 -->    | chemosensitivity | 30988674 | 10.1186/s11658-019 |
| positive Regulation: MIR625 -->    | chemosensitivity | 31115501 | 10.3892/ijmm.2019. |
| positive Regulation: MIR625 -->    | chemosensitivity | 28979807 |                    |
| positive Regulation: MIR625 -->    | chemosensitivity | 35955533 | 10.3390/ijms231583 |
| positive Regulation: NR4A1 -->     | chemosensitivity | 27264242 | 10.1016/j.bbcan.20 |
| positive Regulation: NR4A1 -->     | chemosensitivity |          | 10.1016/j.jsps.202 |
| positive Regulation: MAPK13 -->    | chemosensitivity | 26512696 | 10.3390/cancers704 |
| positive Regulation: PCDHGB7 -->   | chemosensitivity | 31379979 | 10.1155/2019/61315 |
| positive Regulation: PCDHGB7 -->   | chemosensitivity | 31379979 | 10.1155/2019/61315 |
| positive Regulation: TMEM100 -->   | chemosensitivity | 31188741 | 10.1515/hsz-2019-0 |
| positive Regulation: TMEM100 -->   | chemosensitivity | 31188741 | 10.1515/hsz-2019-0 |
| positive Regulation: TMEM100 -->   | chemosensitivity | 34422038 | 10.1155/2021/55523 |
| positive Regulation: TMEM100 -->   | chemosensitivity | 34422038 | 10.1155/2021/55523 |
| positive Regulation: CTBP1 -->     | chemosensitivity | 33613771 | 10.7150/jca.521151 |
| positive Regulation: MIR4306 -->   | chemosensitivity | 34021861 | 10.1007/s12013-021 |
| positive Regulation: LRIG1 -->     | chemosensitivity | 29230082 | 10.1155/2017/96735 |
| positive Regulation: LRIG1 -->     | chemosensitivity | 29230082 | 10.1155/2017/96735 |



|                                  |                  |          |                    |
|----------------------------------|------------------|----------|--------------------|
| positive Regulation: MIR205 -->  | chemosensitivity | 24568460 | 10.7314/APJCP.2014 |
| positive Regulation: MIR205 -->  | chemosensitivity | 25308719 |                    |
| positive Regulation: MIR205 -->  | chemosensitivity | 27271572 | 10.1371/journal.po |
| positive Regulation: MIR205 -->  | chemosensitivity | 23073476 | 10.1016/j.canlet.2 |
| positive Regulation: MIR205 -->  | chemosensitivity | 24147037 | 10.1371/journal.po |
| positive Regulation: MIR205 -->  | chemosensitivity | 27271572 | 10.1371/journal.po |
| positive Regulation: MIR205 -->  | chemosensitivity | 27362808 | 10.1038/cddis.2016 |
| positive Regulation: MIR205 -->  | chemosensitivity | 30982496 | 10.3727/096504018X |
| positive Regulation: MIR205 -->  | chemosensitivity | 32277654 |                    |
| positive Regulation: MIR205 -->  | chemosensitivity | 32277654 |                    |
| positive Regulation: MIR205 -->  | chemosensitivity |          | 10.3892/or.2021.79 |
| positive Regulation: MIR205 -->  | chemosensitivity | 34453639 | 10.1007/s10555-021 |
| positive Regulation: MIR205 -->  | chemosensitivity | 34839317 | 10.1097/CM9.000000 |
| positive Regulation: MAEA -->    | chemosensitivity | 28931648 | 10.1042/BCJ2016078 |
| positive Regulation: XBP1 -->    | chemosensitivity | 27045680 | 10.1016/j.jsbmb.20 |
| positive Regulation: GLI3 -->    | chemosensitivity | 34453645 | 10.1007/s11010-021 |
| positive Regulation: BAK1 -->    | chemosensitivity | 11803466 |                    |
| positive Regulation: BAK1 -->    | chemosensitivity | 30592293 | 10.3892/or.2018.69 |
| positive Regulation: BAK1 -->    | chemosensitivity | 30592293 | 10.3892/or.2018.69 |
| positive Regulation: BAK1 -->    | chemosensitivity | 30592293 | 10.3892/or.2018.69 |
| positive Regulation: BAK1 -->    | chemosensitivity | 33312200 | 10.1155/2020/26790 |
| positive Regulation: BAK1 -->    | chemosensitivity | 23497288 | 10.1186/1475-2867- |
| positive Regulation: BAK1 -->    | chemosensitivity | 11803466 | 10.1038/sj.onc.120 |
| positive Regulation: FA2H -->    | chemosensitivity | 30738828 | 10.1016/j.ebiom.20 |
| positive Regulation: SLC27A4 --> | chemosensitivity | 26662804 | 10.1007/s13277-015 |
| positive Regulation: SLC27A4 --> | chemosensitivity | 26662804 | 10.1007/s13277-015 |
| positive Regulation: SST -->     | chemosensitivity | 14769829 |                    |
| positive Regulation: SST -->     | chemosensitivity | 18785538 |                    |
| positive Regulation: SST -->     | chemosensitivity | 19950772 |                    |
| positive Regulation: SST -->     | chemosensitivity | 20359855 | 10.1016/j.biopha.2 |
| positive Regulation: SST -->     | chemosensitivity | 20359855 | 10.1016/j.biopha.2 |

295  
295  
29510.18632/aging.202295  
66620120715063210.2174/1568009620666201207150632  
00895  
0410.3892/o1.2018.9604  
0410.3892/o1.2018.9604  
08  
0.1113/JP277052

586  
ccr-0798-3  
019.01.010  
899927  
899927  
2012.10.003  
2012.10.003  
2021.11014610.1016/j.cellsig.2021.110146

03  
CCR-04-0242  
4.08.150  
4.08.150  
0.12.007  
016.11.139  
016.11.139  
018.04.153  
018.04.153  
018.04.153  
018.06.050  
018.10.061

0308  
0343-1  
076  
61.6.4  
0.19310.1038/cddis.2013.193  
694469310.1109/EMBC.2014.6944693  
018.04.15310.1016/j.biopha.2018.04.153  
018.04.15310.1016/j.biopha.2018.04.153  
018.04.15310.1016/j.biopha.2018.04.153

7010099  
7010099  
11  
-07040-2  
0.062  
-09614-z  
-09614-z  
58508  
58508  
018.05.046



'58508  
'58508  
'58508  
'58508  
239308  
02006\_21640  
'5850810.1074/jbc.M116.758508  
-04249-4  
'017.06.181  
;-0270-x  
;-0270-x  
;-0270-x  
me.0088827  
;-0270-x10.1186/s12964-018-0270-x  
;-0270-x10.1186/s12964-018-0270-x  
t.2199610.18632/oncotarget.21996  
;-00354-4  
;-01622-910.1186/s12943-022-01622-9  
;-01622-9  
;-01622-9  
;-01622-9  
;-01622-9  
'018.08.010  
;-00551-1  
;-00551-1  
'0.1002/jps.24128  
'0.1002/jps.24128  
'1.11.029  
'0.01.015  
r.2004.04.003  
'7.09.001  
'0.12.001  
ology.2008.04.003  
'006.02.002  
'12.025

'188  
;-1498-7\_10  
;-1498-7\_1

15  
-0640-y  
1. 302  
-9557-0  
one. 0042985  
-0907-6  
-5590-1-5  
60  
1  
0803  
01774

-09-11177310. 1182/blood-2007-09-111773  
CCR-09-122910. 1158/1078-0432. CCR-09-1229  
01. 01110. 1016/j. tox. 2010. 01. 011  
0. 1172/JCI43897  
t. 244  
-08356-3\_7  
014. 01. 027  
1. 13. 4. 1425  
1. 13. 4. 1425  
1. 13. 4. 1425

0. 1002/ijc. 31197

0  
0  
0  
010. 1042/BSR20200390  
-00613-6  
010. 11. 028  
67  
one. 003150710. 1371/journal. pone. 0031507  
3. 00149  
3. 00149  
3. 00149  
017. 08. 084  
41  
24  
593  
02001\_20043  
02002\_20351  
01010. 3892/or. 2016. 4810  
0. 1002/jbt. 22168  
-04271-6  
-04271-6  
05. 04. 023  
552  
0778  
0

67  
671  
671  
one. 0072615

i-4691-5  
4510. 2147/CMAR. S246545  
2013. 05. 017  
.023

031  
4634  
4634  
;  
-02985-1  
-13-35  
14562725373798  
14562725373798  
14562725373798  
CCR-11-049410. 1158/1078-0432. CCR-11-0494

;  
-03171-z  
625  
03. 10. 024  
03. 10. 024

-01509-7  
019. 109495  
020. 111099  
19. 02. 002  
01905\_17800  
19. 02. 002  
19. 02. 002

;  
.94  
0. 1002/jbt. 21888  
0. 08. 019  
0. 08. 019

l  
er. 2021. 05. 016

018. 1433502  
5  
5

. 153373  
017. 06. 089  
017. 06. 089

9

019.1635870

019.1635870

019.1635870

i33

i33

017.06.08910.1016/j.biopha.2017.06.089

017.06.08910.1016/j.biopha.2017.06.089

133410.3892/mmr.2020.11334

-00282-9

022.03.014

.

.

me.0056197

-10-5810.1186/1471-2407-10-58

l.118255

l.118255

016.09.004

mc.2017.10.003

l.08.005

015.03.045

016.01.004

i-5050-x

i-5050-x

i-5066-2

697553

l.08.005

i46

i46

2455

i4610.3892/or.2014.3646

i4610.3892/or.2014.3646

-01441-210.1186/s12935-020-01441-2

021.189944110.1080/1120009X.2021.1899441

021.189944110.1080/1120009X.2021.1899441

66

-00728-y10.1007/s13577-022-00728-y10.3322/caac.2155110.1016/j.cell.2012.02.00510.

-00728-y

-00728-y

-00728-y

2020.109665

2020.109665

2020.109665

2020.109665

2020.109665

5

5

5

5

5

5

:5  
:5  
:5  
:510.12659/MSM.917625  
:510.12659/MSM.917625  
:6.09.040  
:6.09.040  
:6.09.040  
:020.100987  
:021.101109  
:2018  
:1639-8  
:694469310.1109/EMBC.2014.6944693  
:6.09.04010.1016/j.bbrc.2016.09.040  
:022.05.024  
:022.2132008  
:1.12.004  
:1.12.004  
:(02)00119-2  
:010.11.028  
:07523-8  
:t.655410.18632/oncotarget.6554  
  
:CCR-13-058210.1158/1078-0432.CCR-13-0582  
:02.018  
:03115-3  
:0858-7  
:0858-7  
:0858-7  
:0858-7  
:0858-710.1038/s41388-019-0858-7  
:  
:1.450  
:1.450  
:0374-7  
:1.10091810.1016/j.gore.2021.100918  
:09.005  
:1.08.001  
:9204  
:9204  
:9204  
:9204  
:106842  
:9910.2147/CMAR.S277399  
:0000001359  
:07963-4  
:292  
:020.02.002  
:012.04.013  
:1.08.630  
:2831-7  
:2831-7  
:03505-9  
:03505-9



s. 12758  
019. 167648510. 1080/21655979. 2019. 1676485  
2200  
019. 188336  
006. 02. 002

99  
59

298

210. 2147/OTT. S196832

8. 08. 107

8. 08. 107

8. 08. 107

8. 08. 107

8. 08. 107

5. 01. 003

0. 1002/iub. 1133

056010. 3892/etm. 2020. 9560

056010. 3892/etm. 2020. 9560

-14-686

-14-686

-14-686

0-2656-010. 1038/s41419-020-2656-0

017. 02. 004

7. 05. 006

010. 02. 001

012. 05. 005

0. 04. 006

s. 11. 010

0-1237-2

15

61102N528

0-2390-7

-0034-6

31825e0caa

76

0-4693-3

010. 02. 00110. 1016/j. canlet. 2010. 02. 001

7610. 1038/onc. 2012. 176

0-0599-510. 1007/s13277-012-0599-5

42

000000080410. 1097/CAD. 0000000000000804

es902020710. 3390/biomedicines9020207

0-00607-9

0-00607-9

0-00607-9

0-00607-9

0-00607-9

0-00607-9

f-00607-9

62

l. 450

l. 450

er. 2019. 05. 012

050

f-2557-2

02006\_21665

020. 1761238

l. 148

l. 148

l. 148

l. 148

l. 148

949

76956310. 3389/fonc. 2021. 769563

698364

-05101-2

f-1586-x10. 1007/s11010-013-1586-x

021. 188552

0. 06. 028

-0053-8

61169910. 3389/fonc. 2020. 611699

764

764

764

764

764

764

021. 04. 001

021. 04. 001

0381

017. 08. 084

018. 08. 010

018. 08. 010

3

f-5671-810. 1245/s10434-016-5671-8

698356

f-0341-z

-04413-0

021. 02. 007

016. 160204

618

618

one. 007762310. 1371/journal. pone. 0077623

10. 2147/OTT. S76484

016. 160204



07. 11. 043  
i79  
042713  
MCT-07-0449  
4. 2. 9510. 4162/nrp. 2020. 14. 2. 95  
08. 10. 004  
F-0858-7

07710. 2147/DDDT. S269277  
07710. 2147/DDDT. S269277  
02002\_20346  
F-2737-y  
4593  
4593  
4593  
4593  
4593  
4593  
694469310. 1109/EMBC. 2014. 6944693  
459310. 3892/i jmm. 2020. 4593  
459310. 3892/i jmm. 2020. 4593  
0210. 2147/OTT. S281802  
2017. 07. 056  
i. 02. 009  
i. 12. 034  
05. 03. 153  
0. 03. 082  
i(01)00733-X  
i(03)00078-9  
i(03)00397-6  
i. 03. 009  
i. 10. 048  
i(05)66150-2  
i(05)67323-5  
99907000-00017  
i(02)01900-8  
i(02)02177-X  
03. 09. 011  
2005. 01. 018  
i(03)00282-8  
i(03)00282-8  
004. 12. 053  
004. 12. 053  
2005. 12. 002  
i. 11. 029  
i(01)00230-6  
i. 10. 003  
i(99)00345-6  
i(00)00480-8  
i(03)00088-0  
0004. 03. 044  
0005. 06. 002  
0006. 06. 013

008.06.006  
09.04.008  
1.07.052  
2.01.099  
3.03.004  
07.06.006  
07.06.006  
4.2005.10.006  
006.03.009  
04.10.014  
05.04.044  
;(03)00066-0  
2005.08.002  
009.03.008  
0.12.001  
;(03)00084-4  
;(03)00078-3  
0.08.016  
;.2006.08.001  
o1.2012.08.003  
2.03.004  
012.12.025  
013.08.028  
014.01.011  
4.08.014  
014.09.001  
014.11.016  
4.03.007  
4.03.007  
014.11.016

77

0.7150/jca.14506

016.1215390

37710.18632/aging.103377

0. 7150/jca. 14506

i-3869-x  
i-0091-8  
i-2617-2  
i561  
i561  
i40R  
i40R  
06. 08. 001

99

:

061  
me. 0036940  
i28  
i28  
i-0690-0  
i613  
80125N55  
i54  
i-0910-2  
i1121  
i8  
i8  
i-03185-310. 1038/s41419-020-03185-3  
i-03185-3  
091  
020. 100780  
i-01729-3  
r. 2021. 03. 010  
i1. 07. 022  
022. 01. 001  
i. 108571

l. 108571  
47  
017. 1356508  
l. 10857110. 1016/j. abb. 2020. 108571  
-07590-z  
l. 01. 052  
47410. 1515/med-2022-0474  
l. 101597  
)  
)  
010. 14670/HH-18-130  
  
011. 04. 004  
  
-03878-3  
-0215-RA  
CAN-06-2310  
l. 22. 5. 151310. 31557/APJCP. 2021. 22. 5. 1513  
  
7710. 3892/or. 2014. 3677  
t. 917910. 18632/oncotarget. 9179  
. 71526310. 3389/fmolb. 2021. 715263  
665  
665  
66510. 3892/mmr. 2017. 7665  
i-5048-4  
0. 1038/srep40187  
018. 10. 061  
01908\_18559  
0. 1002/path. 4743  
CAN-16-0937  
-04480-7  
l. 1002/cbf. 3604  
l. 1002/cbf. 3604  
018. 10. 005  
l. 108480  
8. 12. 055  
021. 174006  
017. 02. 020  
0  
0  
0  
0  
0  
70112N25  
me. 0120258  
51  
010. 1038/onc. 2014. 9  
010. 1038/onc. 2016. 90  
-00348-2  
020. 12. 01710. 1016/j. canlet. 2020. 12. 017  
020. 12. 01710. 1016/j. canlet. 2020. 12. 017  
021. 05. 02410. 1016/j. canlet. 2021. 05. 024

i1010.3390/i jms17040610  
016.11.090  
20.03.024  
r.2020.05.011  
014.07.011  
709991  
82  
751  
30  
-13-21  
-13-21  
-13-21  
me.0114419  
014.1001287  
i-4409-8  
-1821-410.1007/s13277-014-1821-4  
2014.00119  
i618849  
-83282-7\_1  
0018  
96  
i19  
00116  
-03866-y

.2152-20190813-00517  
881  
.64610.3892/o1.2020.11646  
96609  
f-0858-7  
f-0858-7  
f-0858-7  
f-0858-7  
f-01887-8  
9  
i15  
i15  
i15  
020.1727700  
f-0137-3  
0179

f-07401-5  
-02149-510.1186/s13046-021-02149-510.1136/bmj.1437310.1053/j.gastro.2017.08.02310  
-02149-5  
f-02278-510.1186/s13046-022-02278-5  
f-02278-5  
011.11.018  
f-01750-4  
f-01750-4  
f-01750-4

1-01750-4  
1-01750-4  
1-01750-4  
CAN-10-204810. 1158/0008-5472. CAN-10-2048  
9510. 3892/o1. 2017. 5895  
9510. 3892/o1. 2017. 5895  
1. 04. 063  
2018. 01. 041  
2021. 05. 004  
2020. 110799

15742472027401  
15742472027401  
0. 1159/000490027  
1574247202740110. 3727/096504019X15742472027401  
2017. 08. 084  
1-0030-7  
1-0030-7  
1-0030-7  
1-0694-9  
8  
t. 1073610. 18632/oncotarget. 10736  
229  
229  
22910. 3892/mmr. 2017. 8229

2016. 03. 012  
1. 07. 030  
4. 01. 108  
1-1261-0  
10. 1002/cbin. 11789  
10. 1002/cbin. 11789  
10. 1002/cbin. 11789  
iomed. 2017. 07. 008  
666170818161132  
4019  
4019  
ne. 0092847  
ne. 0092847  
ne. 0092847  
t. 654510. 18632/oncotarget. 6545  
t. 654510. 18632/oncotarget. 6545

1. 00840  
0. 1111/cas. 14733  
20610. 3390/genes12081206  
10. 0310. 21037/tcr. 2019. 10. 03  
r. 2022. 05. 012

2.03.003

et. 695110.18632/oncotarget. 6951

:5

:628

:628

:908

:908

:908

:908

:908

:90810.18632/aging. 202908

-13

-13

:016.08.026

|-01402-9

|-01402-910.1186/s12935-020-01402-9

:944

|-03891-6

|-1145-3

:

:

et. 2514710.18632/oncotarget. 25147

l. 03.011

-32-41

|-0596-4

l. 05.001

l. 05.001

l. 05.001

l. 01.013

02003\_20680

91029N1102

91029N1102

91029N1102

91029N1102

666210706113102

010.1093/jb/mvaa036

8.08.019

:015.1040963

:015.104096310.1080/15384047. 2015.1040963

:67510.3892/etm. 2017.5675

:67510.3892/etm. 2017.5675

:3010.2147/CMAR. S333830

|-2557-2

|-2557-2

|-2557-2

|-2557-2

|-2557-2

|-2557-2

|-2557-2

|-2557-2

:89

(03)00854-4

332844

8.04.005

1.152726

2021.04.006

19.05.046

42059-2\_5

i-2827-6

1609753

-30-20

-30-20

-30-20

-30-20

-30-20

me.0096228

0503

i46

025

-07010-8

-07040-2

90106N18

90106N18

90106N18

90106N1810.4149/neo\_2019\_190106N18

90106N1810.4149/neo\_2019\_190106N18

i-2253-x

904847

904847

904847

904847

904847

904847

i2

-0972-x

i-2108-y10.1007/s00280-013-2108-y

77152810.3389/fonc.2021.771528

7.11.164

2020.173094

0.144629

0.144629

0.144629

0.144629

0.14462910.1016/j.gene.2020.144629

05

3082110.3390/cancers14030821

0.07.046

9.06.010





-04337-8

.94

:38

.8.04.005

.08.005

:015.07.018

:015.07.018

:015.12.002

:898

'-0134-z

:8

:8

:1

me.007762310.1371/journal.pone.0077623

:0000001928

:310.2147/OTT.S232953

:1.03.008

8310.20517/cdr.2019.83

:52

2009.05.054

2009.05.054

'-0211-4

:399

:399

:399

:399

:011

-13-25

-13-25

:0

:0

:0

:0

:600

:600

:600

:600

:60010.1248/cpb.c20-00600

:0930-0

:0930-010.1186/s13046-018-0930-0

:.11.014

:.11.014

:20610.3390/genes12081206

:666200519075908

.03.011

1433610.1111/1759-7714.14336

1433610.1111/1759-7714.14336

:.01.019

:020.110768

:1.105442

.2.11.086

666170222123406  
0373  
0373  
050  
095  
095  
095  
053  
14298122915628

09510.3892/or.2013.2695  
09510.3892/or.2013.2695  
09510.3892/or.2013.2695  
05310.3892/or.2015.3853  
1429812291562810.3727/096504015X14298122915628  
072  
5.12.060

0s.12596  
0-0602-8  
4504  
0666200226124336

0-0649-310.1186/s13046-017-0649-3  
9.144126  
014.07.026  
0244.2018  
048467  
0-00605-4  
014.07.02610.1016/j.canlet.2014.07.026  
014.07.02610.1016/j.canlet.2014.07.026  
0-0033-810.1038/s41408-017-0033-8  
0-01550-y  
2016.12.001  
030  
0210.1155/2017/9032502  
0-00988-510.1038/s41420-022-00988-5

0666190819151946  
016.10.035  
0-03282-3  
0-0168-710.1186/s11658-019-0168-7  
0-00379310.1136/jitc-2021-003793  
0-00379310.1136/jitc-2021-003793  
0-00379310.1136/jitc-2021-003793  
0-03149-210.1007/s00432-020-03149-210.1111/dgd.1203910.1038/onc.2014.4010.1172/JCI  
0-03165-210.1007/s00432-020-03165-2  
0-03165-210.1007/s00432-020-03165-2

i. 208  
i. 208  
i. 208  
i. 208  
i. 208  
i. 208  
l. 118255  
l. 111309  
017. 02. 004  
020. 110395  
9. 03. 005  
9. 03. 005  
-42059-2\_11  
811  
811  
811  
811  
790  
f-0834-z  
f-0834-z  
f-0834-z  
f-0834-z  
9. 03. 005  
9. 03. 005  
902  
92  
967818  
967818  
967818  
999201214234421  
l. 1111/os. 12442  
8. 10. 543  
47  
47  
47  
47  
47  
i. 12. 013  
020. 110768  
tes10092240  
l. 05. 080

006  
i2  
i2  
f-1715-x  
f-1715-x  
f-1715-x  
f-1715-x  
f-1715-x  
f-1715-x  
f-1715-x  
f-1715-x

l-1715-x  
l-00237-w

026  
t. 683  
l-1715-x10.1038/s41419-019-1715-x  
l-1715-x10.1038/s41419-019-1715-x  
666210120141546  
l-3651-3  
l-3651-3  
21.188552  
64.15.10  
64.15.10  
64.15.10  
64.15.10  
64.15.10  
64.15.10  
64.15.10

48467  
logy.2003.07.001  
018.03.088  
118.023648  
t.2009910.18632/oncotarget.20099  
t.2009910.18632/oncotarget.20099  
6.09.040  
017.08.084  
020.100987  
8.11.009  
697575  
697575  
697575  
87  
87  
l-00286-3  
l-00286-3  
l-00286-3  
61  
61  
ne.0150026  
ne.0150026  
ne.0150026  
ne.0150026  
i-4528-2  
694469310.1109/EMBC.2014.6944693  
i-4528-210.1007/s13277-015-4528-2  
ne.015002610.1371/journal.pone.0150026  
23810.3892/etm.2019.8238  
l-00286-310.1186/s40659-020-00286-3  
20610.3390/genes12081206  
.282  
.282  
020.112758

-01768-8  
CCR-18-053210. 1158/1078-0432. CCR-18-0532  
l. 108480  
019. 108800  
ology. 2020. 104916  
ology. 2020. 104916  
021. 102159  
015. 03. 027  
015. 03. 027  
015. 03. 027  
ber. 9. 5

. 178  
14  
14  
703825  
05  
0430  
09  
053  
053  
053  
053  
053  
me. 0094065  
057  
057  
057  
057  
057

i-3831-2  
i-3831-2  
i-3831-2  
i-3831-2  
i-3831-2  
i-3831-2  
05310. 3390/i jms131216053  
05310. 3390/i jms131216053  
02. 1134710. 3748/wjg. v20. i32. 11347  
-2814-z10. 1007/s13277-014-2814-z  
05710. 3892/or. 2014. 3657  
i-3831-210. 1007/s13277-015-3831-2  
14510. 1093/carcin/bgv145  
l. 1002/mc. 22612  
1410. 1038/onc. 2016. 414  
0. 1159/000460505  
0. 1159/000460505  
-04249-4

0240  
022.021510  
021.188552

0361  
01553  
0148  
013.05.037  
0263-x  
097210.3892/o1.2020.11972  
09.02.093  
018.02.118  
07  
017.1367071  
0461  
01176-7  
01176-7  
075  
046110.1038/cddis.2016.461  
0774  
04337-8  
07  
0.1111/bjh.15878  
chem.2019.01.002  
3382  
3382  
0940  
et.1767710.18632/oncotarget.17677  
et.1767710.18632/oncotarget.17677  
0.1002/jcp.27288

014  
0  
04559-8  
04559-8  
04559-8  
04559-8  
04559-8  
me.0040008  
me.0053436  
0402-5  
04559-8  
0.07.003  
021.101090

04  
04  
04  
MCT-12-0534-T10.1158/1535-7163.MCT-12-0534-T  
MCT-12-0534-T10.1158/1535-7163.MCT-12-0534-T  
0410.1042/BSR20150084  
000500-010.1007/s13402-020-00500-010.1016/j.eururo.2016.06.01010.1002/msj.2022410  
00615-y10.1007/s13402-021-00615-y  
666210902113824

7. 03. 162  
1-1415-6  
7. 03. 16210. 1016/j. bbrc. 2017. 03. 162  
71

1-00742-4  
t. 1378910. 18632/oncotarget. 13789  
t. 1378910. 18632/oncotarget. 13789  
-00198-8

53  
i-0328-5  
49  
1-00414-610. 1038/s41389-022-00414-6  
3. e6710. 4048/jbc. 2020. 23. e67  
-02019-0  
-02019-0  
018. 09. 031  
5. 08. 053  
i. 04. 011  
956  
0308  
1-3548-1  
0283. 2017

1-07227-1  
4910. 3892/o1. 2018. 8849  
021. 188552  
8-0141  
902  
1-03123-3  
35410. 3892/etm. 2017. 5354  
00710. 3892/etm. 2018. 6007  
00710. 3892/etm. 2018. 6007  
0. 7150/jca. 31191  
1-04791-z  
1-04791-z  
1-04791-z  
4. 01. 014  
4. 01. 014  
4. 01. 014  
021. 173923  
021. 173923  
2018. 10. 031

1-0651-4  
0. 1159/000492260  
(10)60010-310. 1016/S1674-8301(10)60010-3  
(10)60010-310. 1016/S1674-8301(10)60010-3  
5. 15. 6. 2619  
2017. 01. 001



018.06.114  
018.06.114  
020.110768  
r.2020.05.017  
695964  
018.171124  
409  
409  
409  
0  
910.1093/abbs/gmv129  
910.1093/abbs/gmv129  
018.06.11410.1016/j.biopha.2018.06.114  
018.06.11410.1016/j.biopha.2018.06.114  
018.06.11410.1016/j.biopha.2018.06.114  
r.2022.08.003  
6.03.083  
6.03.083  
i-2205-5  
i-2205-5  
i-2205-5  
i-2205-510.1007/s00432-016-2205-5  
711089  
711089  
71108910.1177/1010428317711089  
018.07.024  
018.07.024  
020.111111  
0566  
0566  
018.07.024  
018.07.024  
022.113813  
-11-54  
902  
-0965-9  
me.0053436  
l.152612  
018.08.052  
020.111099  
i-4988-z  
i-0432-8  
0000000745  
02001\_20038  
666191112142943  
-00975-0  
010.1002/cbin.10100  
1810.3892/or.2014.3318  
710.1093/jjco/hyv027  
t.1483910.18632/oncotarget.14839  
-0981-7  
-01211-8  
  
1810.3892/or.2014.3318

94RR  
-02474-y  
841  
53  
75  
-01627-410. 1186/s12943-022-01627-4  
-01627-4  
l. 153266  
2020. 109858  
30  
-03906-4  
-03906-4  
-02907-1  
205  
1810. 3892/or. 2014. 3318  
-0178-710. 1186/s13048-015-0178-7  
-1082-910. 1186/s12935-019-1082-9  
-1082-910. 1186/s12935-019-1082-9  
-1082-910. 1186/s12935-019-1082-9

-03906-410. 1007/s11010-020-03906-4

1810. 3892/or. 2014. 3318

7010099

81

823

79525

79525

018. 10. 080

me. 0055513

75

-08-2501

i(02)01900-8

2010. 01. 030

'(00)01742-9

004. 03. 044

004. 05. 023

009. 03. 003

;(98)00018-3

010. 12. 006

012. 12. 002

012. 12. 002

17

me. 0090180

2345

)

me. 0036722  
i-0668-710. 1007/s12013-015-0668-7  
0000001377

01805\_15067  
06610. 3892/etm. 2019. 8066  
06610. 3892/etm. 2019. 8066  
269  
40R  
40R  
40R  
40R

me. 0136484  
me. 0136484  
me. 0136484  
me. 0136484  
me. 013648410. 1371/journal. pone. 0136484  
io. 300042510. 1371/journal. pbio. 3000425  
0000002018  
0000002018  
0000002018  
-0390-7

.610  
.80805N574  
. 11940510. 1016/j. lfs. 2021. 119405  
247  
01910\_19155  
01910\_19155

-08592-5  
-08592-5  
010. 1111/hepr. 12500  
010. 1111/hepr. 12500  
-08592-510. 1007/s12017-020-08592-5  
-08592-510. 1007/s12017-020-08592-5  
ology. 2017. 02. 015  
CAPR-15-0338

;  
;  
918  
t. 3165  
;10. 1039/c6mb00678g  
1545218788883910. 3727/096504018X15452187888839  
-0084-310. 1038/s41392-019-0084-3  
-0084-310. 1038/s41392-019-0084-3  
-01718-z10. 1007/s10495-022-01718-z10. 1016/j. critrevonc. 2020. 10298810. 1016/S0925-5  
3683  
368310. 3892/i jmm. 2018. 3683

t. 1912

005270

005270

005270

me. 0068990

066

066

066

066

03930-010. 1186/s12885-017-3930-0

03930-0

03930-0

02199610. 18632/oncotarget. 21996

000354-4

0705766

0705766

0705766

0705766

011. 09. 003

0797

0797

0797

0410. 3892/or. 2014. 3704

079

044

0610. 1530/JME-19-0186

086733405

2709

09221

069080-3\_4410. 1007/978-0-387-69080-3\_44

06. 01. 090

CAN-09-318610. 1158/0008-5472. CAN-09-3186

CAN-09-318610. 1158/0008-5472. CAN-09-3186

039

014-781

020. 110768

018. 05. 079

0s. 11349

0s. 11349

08. 03. 013

08. 03. 013

059

00000000572

0-2053-8

0-0118-y

2012. 01. 01210. 1016/j. cellsig. 2012. 01. 012

8.03.01310.1016/j.gene.2018.03.013  
-04337-8  
38010.3892/o1.2022.13380  
i-3354-y  
018.1433502  
01.01.003  
24  
24  
24  
019.172664  
iomed.2012.05.041  
iomed.2012.05.041  
82  
82  
82  
82  
82  
82  
82  
82  
82  
709  
709  
8210.1155/2020/6452182  
295  
s.12667  
95  
t.2675810.18632/oncotarget.26758  
0.1002/cam4.2547  
0.1111/cas.14361  
6610.1093/abbs/gmab066  
-00535-110.1007/s10616-022-00535-1  
-00535-1  
018.08.059  
1118-18.2019  
018.10.061  
5010.3892/o1.2018.8850  
5010.3892/o1.2018.8850  
015.06.010  
  
012  
82  
82  
82  
01110  
  
8210.1038/onc.2011.182  
-31-6310.1186/1756-9966-31-63  
46810.3892/etm.2017.5468  
0.7150/jca.52115  
016.09.058  
020.100769  
008.05.045  
i18  
885083

0885083  
020.100769  
17  
-00583-5

CAN-04-2501  
t. 3896  
65  
i. 120  
6  
i. 120

0. 7150/jca. 18171  
168  
40  
80  
one. 0056197  
10. 1038/leu. 2008. 8  
10. 1038/leu. 2008. 8  
117. 17  
18. 07. 032  
18. 07. 032  
875. 2005  
8. 07. 00310. 1016/j. resp. 2008. 07. 003  
3710. 1002/cphy. c100037  
19. 03. 016  
2008. 03. 055  
666200318130625

20  
i. 4161/cc. 24497  
0. 1002/jcp. 27196  
MCR-19-085610. 1158/1541-7786. MCR-19-0856  
-03793-2  
-03793-2  
i. 111309  
2014. 03. 013  
i. 461  
59  
59  
-2143-0

17  
17  
3  
01812\_16630  
-01853-6  
2017. 01. 05810. 1016/j. biopha. 2017. 01. 058  
-1512-510. 1186/s13046-019-1512-5  
17  
17

3  
01812\_16630

92

04976-6

00427-8

10. 023

10. 023

0097-1

98110

0097-110. 1038/s41419-017-0097-1

5244-2

037

10

15420734828058

15420734828058

15420734828058

15420734828058

1086-z

1542073482805810. 3727/096504018X15420734828058

15420734828058

15420734828058

15420734828058

15420734828058

1086-z

666201111145212

00032-7

0. 1038/srep42319

0. 1038/srep42319

6

6

6

6

6

01. 037

014. 10. 004

118147

021. 04. 001

020. 08613

10. 1111/jcmm. 14462

118255

ials. 2018. 04. 027

019. 108800

3. 05. 001

4. 09. 010

5. 04. 015

r. 2015. 07. 001

nc. 2015. 07. 002

3457-4

546

35

'35  
'35  
i-0433-7  
025  
403  
.3149990183  
e-0134-1  
i46  
084

MCT-08-104610. 1158/1535-7163. MCT-08-1046  
-0117-410. 1007/s12032-011-0117-4  
0. 1002/jcb. 24398  
MCT-12-046310. 1158/1535-7163. MCT-12-0463  
.810. 1038/onc. 2015. 48  
.810. 1038/onc. 2015. 48  
.810. 1038/onc. 2015. 48  
-14088-310. 1038/s41598-017-14088-3  
-14088-310. 1038/s41598-017-14088-3  
.20610. 3390/genes12081206  
era. 2016. 01. 011  
era. 2016. 01. 011  
.93  
et. 655410. 18632/oncotarget. 6554  
l. 05. 032  
.728  
.72810. 3892/i jo. 2019. 4728  
0. 1111/cpr. 12875  
0. 1111/cpr. 12875  
020. 188391  
-2368-510. 1038/s41419-020-2368-5  
i-3814-3  
i-3814-3  
09. 02. 002  
09. 12. 002  
009. 04. 003  
i. 02. 017  
013. 03. 002



74039-3\_5  
328341ee38

015. 01. 010  
4666  
5033  
0859

9504  
0. 1002/ijc. 24684  
06. 2010. 01568. x10. 1111/j. 1349-7006. 2010. 01568. x  
030810. 1002/cbdv. 200900308  
30710. 1093/annonc/mdt307  
015. 01. 01010. 1016/j. bulcan. 2015. 01. 010  
es902020710. 3390/biomedicines9020207  
669

omed. 2012. 05. 041  
0000000908  
0000000908  
021. 05. 013  
02. 04. 00410. 1016/j. canep. 2012. 04. 004  
i-0815-710. 1186/s12957-016-0815-7  
8. 08. 142  
0. 11. 031  
018. 01. 041  
018. 07. 131  
78  
78  
78

80125N55  
80125N55  
80125N55  
80125N55

01318-6  
897  
71  
71  
me. 011458610. 1371/journal. pone. 0114586

one. 011458610. 1371/journal. pone. 0114586  
89710. 3892/mmr. 2017. 6897  
10. 1002/jcla. 23369  
78  
021. 11. 004  
021. 11. 004  
3. 3. 229  
021. 11. 004  
-03456-x10. 1186/s12967-022-03456-x  
2006\_21645  
70433910. 3389/fonc. 2021. 704339  
018. 06. 007  
i. 07. 003  
8-0141  
;  
-09869-x  
018. 06. 00710. 1016/j. biocel. 2018. 06. 007  
2021. 104837

252  
252  
)  
)

05210. 1139/bcb-2013-0052  
25210. 3892/mmr. 2015. 3252

1609753  
020. 173094  
016. 08. 015  
017. 10. 163  
018. 11. 003  
2021. 110016  
onc. 2016. 05. 010  
r. 2019. 05. 020  
018. 04. 002  
9. 09. 031  
20. 04. 002  
0. 11. 005  
2014. 04. 024

365

573  
5  
613  
1238  
1238  
1238

1-00567-2  
03  
-03854-x  
0666210108103134  
-13-21  
1-0653-1  
;  
-13-8  
-2547-z  
0000000235  
31  
31  
ber. 29. 12  
0. 1002/path. 3007  
012. 09. 00710. 1016/j. arcmed. 2012. 09. 007  
10. 4161/auto. 27418  
0. 1111/cas. 12656  
0. 1111/cas. 12656  
3110. 3892/or. 2015. 4331  
3110. 3892/or. 2015. 4331  
0. 1159/000491665  
0. 1159/000491665  
0. 1159/000491665  
0. 1159/000494004  
1-00461-z10. 1007/s13402-019-00461-z  
10. 1093/jb/mvaa012  
20610. 3390/genes12081206  
;  
0000000235  
5

-09973-3  
es. 2021. 101030  
2054  
2054  
2054  
2054  
2054  
2054  
2054  
2054  
1. 15400410. 1016/j. prp. 2022. 154004  
666211008140811  
1-01551-1  
1. 119504  
11. 11. 010  
11. 11. 010  
ne. 0160248  
ne. 0160248  
20610. 3390/genes12081206  
013. 10. 005  
695920  
5  
1. 01. 013

4. 12. 093  
4. 12. 093  
-0477-5  
-0477-5  
-0477-5  
81  
8. 02. 020

8. 02. 02010. 1016/j. cyto. 2018. 02. 020  
2018. 11. 00110. 1016/j. leukres. 2018. 11. 001  
0000001014  
i1  
i1  
i110. 1038/onc. 2013. 61  
'66  
-02838-x  
i. 03. 023  
ials. 2016. 07. 040  
018. 05. 091  
018. 05. 091  
018. 05. 09110. 1016/j. biopha. 2018. 05. 091  
0000001826  
00

72  
i. 07. 044  
-01489-010. 1186/s12935-020-01489-0

021. 174006  
8200  
020. 05. 003  
013. 08. 007

301  
4342  
910. 2147/OTT. S191239  
34310. 3892/o1. 2020. 12343  
. 51  
l. 03. 006  
0000000116  
0000000116  
0000000116  
9517510. 4103/0973-1482. 95175  
0000000116  
0000000116  
0000000116  
-01638-z  
-0997-7  
4

-01768-8  
627  
627  
627  
627  
i-0043-5  
62710. 3892/i jo. 2014. 2627  
i-0997-7  
4  
.8. 01. 109  
018. 07. 024  
018. 11. 074  
018. 11. 074  
018. 11. 074  
-2463-3  
-2463-3  
-2463-3  
-2463-3  
-2463-3  
-2463-3  
-2463-3  
-2463-3  
-2463-3  
i  
i-8507-9  
i-03866-7  
01912\_19794  
i-2180-310. 1007/s00280-013-2180-3  
  
0. 1038/srep17618  
0. 1038/srep17618  
0. 1038/srep17618  
-2463-310. 1007/s11060-017-2463-3  
018. 11. 07410. 1016/j. biopha. 2018. 11. 074  
12  
94  
017. 08. 011  
021. 188552  
020. 110037  
021. 100385  
021. 100385  
012. 06. 002  
2017. 2258  
70116N37  
676  
i  
  
97  
97  
97  
-12-17  
18  
267  
9710. 3892/or. 2013. 2897  
9710. 3892/or. 2013. 2897

et. 837610. 18632/oncotarget. 8376  
'42  
008. 09. 017  
008. 09. 01710. 1016/j. canlet. 2008. 09. 017  
017. 08. 014  
017. 08. 014  
013. 10. 014  
013. 10. 014  
805865  
-10257-8  
-09553-1  
5  
-0892-910. 1007/s12032-014-0892-9  
  
020. 17348310. 1016/j. ejphar. 2020. 173483  
'98  
-0892-910. 1007/s12032-014-0892-9  
-04249-4  
2014. 07. 011  
'-2389-8  
  
.1. 1999. 01205. x  
CAN-14-294610. 1158/0008-5472. CAN-14-2946  
  
76113  
-02180-4  
1220010. 1002/1878-0261. 12200  
0. 1111/cpr. 12473  
00417N414  
8. 09. 140  
0. 01. 022  
759  
6410610. 3390/cancers13164106  
759  
1. 08. 012  
1. 08. 012  
6. 03. 160  
019. 04. 033  
017. 07. 002  
07. 6. 1312  
71  
6. 03. 16010. 1016/j. bbrc. 2016. 03. 160  
  
. 2018. 12. 075  
'-3435-1  
-03113-5  
-03113-5  
-03113-5  
-03113-5  
. 2018. 12. 07510. 1016/j. ijbiomac. 2018. 12. 075  
. 2018. 12. 07510. 1016/j. ijbiomac. 2018. 12. 075  
me. 0056197  
054  
1. 110662

2.08.029  
-2425-9  
-2425-9  
-2425-9  
-2425-9  
66  
66  
979  
-2425-910.1007/s11060-017-2425-9  
-2425-910.1007/s11060-017-2425-9  
-2425-910.1007/s11060-017-2425-9  
6610.3892/or.2017.5866

202.2012  
17.09.023  
017.08.084  
55  
7  
-09553-1  
-0033-810.1038/s41408-017-0033-8  
-01854-5  
-01854-5  
19  
i.10.002  
694469310.1109/EMBC.2014.6944693  
0.05.011  
-1498-7\_12  
14685034103437

-13-35  
-13-3510.1186/1476-4598-13-35  
22  
t.1544110.18632/oncotarget.15441  
017.03.003  
i-4559-8

01

me.0133643  
me.0133643  
me.0133643  
me.0133643  
me.0133643  
me.005343610.1371/journal.pone.0053436  
l.1172/JCI66553  
01  
l.01.009  
2013.01.013  
i-0628-4

6

i55

-01332-8

-01332-8

0. 1159/000467896

9. 11. 00910. 1016/j. apsb. 2019. 11. 009

6

-0058

0000000162

0610. 1093/abbs/gmt006

018. 08. 004

019. 03. 016

018. 08. 00410. 1016/j. canlet. 2018. 08. 004

019. 03. 016

\_5777

\_5777

6. 11. 011

2. 03. 009

0334. 2010

0334. 2010

0334. 201010. 1152/ajpcel1. 00334. 2010

3. 08. 024

02210. 3892/o1. 2017. 6722

;

813

813

813

813

813

81310. 3892/i jo. 2013. 1813

018. 01. 132

i. 07. 001

7

025

l

.50

06. 2010. 01664. x10. 1111/j. 1349-7006. 2010. 01664. x

025

005778

020. 102971

005778

015. 1040963

i-3966-1

015. 104096310. 1080/15384047. 2015. 1040963

l. 09. 018

017. 09. 020

i-5199-3

:1



:1  
:1  
020. 08770  
086  
:t. 2418  
:110. 1042/BSR20180441  
:110. 1042/BSR20180441  
1239310. 1002/1878-0261. 12393  
66620102916105510. 2174/0929867327666201029161055  
76956310. 3389/fonc. 2021. 769563  
06. 21. 07709-010. 23736/S0026-4806. 21. 07709-0  
-9702-0  
013. 02. 01410. 1016/j. celrep. 2013. 02. 014  
017. 08. 028  
:s. 11349  
:s. 11349  
:s. 11349  
:963  
02006\_21513  
-1759-9

:s. 11349  
:s. 11349  
:s. 11349  
: 12. 009  
017. 02. 004  
8. 06. 005  
019. 105643  
4. 09. 010  
-05228-1  
614  
-00479-5  
-00479-5  
-00479-5  
-00479-5  
-00479-5  
-13-61  
:153  
-0700-6

one. 0094855  
-0700-610. 1007/s11010-010-0700-6  
l. 4161/cc. 24477  
8810. 3892/ol. 2016. 5388

021.1924948  
019.225904  
018.209981

14.11.6321  
8  
137  
137  
137  
137  
137  
137  
137

759  
118255  
8.04.005  
019.105643  
0.05.011  
i-4957-6  
751  
i-0943-6  
920411  
666200226124336  
666200226124336  
0.1002/jcb.28079  
7610.2147/CMAR.S210076  
7610.2147/CMAR.S210076  
751  
i-0943-6  
i-06872-2  
0000001826  
017.06.017  
019.102322  
833

09.10.05210.1016/j.ygyno.2009.10.052  
i-0282-y10.1186/s13046-015-0282-y  
i-0282-y10.1186/s13046-015-0282-y  
i-0282-y10.1186/s13046-015-0282-y  
019.102322

i-00728-y  
666210521213352  
87  
87  
i3  
i3  
i3  
i3

-01768-8  
310.1038/ncomms14053  
711323  
;  
018.10.148  
018.10.148  
019.109551  
-0168-7  
0198341  
018.10.14810.1016/j.biopha.2018.10.148  
20610.3390/genes12081206  
-01606-710.1007/s12032-021-01606-710.1016/j.gene.2019.14430110.2174/0929867328666  
-01606-710.1007/s12032-021-01606-710.1016/j.gene.2019.14430110.2174/0929867328666  
-01606-7  
-01606-7  
-01606-7  
-01606-7  
-01606-7  
-01012-1  
5200  
  
43  
  
-4480-110.1007/s13277-015-4480-1  
00000001348  
337  
337  
337  
-0768-110.1007/s13277-013-0768-1  
-00520-8  
-03446-z  
-03446-z  
-03446-z  
  
4229  
666181213110258  
0.1159/000481610  
ne.021569610.1371/journal.pone.0215696  
422910.3892/ijmm.2019.4229  
  
019.05.010  
3.07.029  
014.08.012  
014.08.012  
014.08.012  
014.08.012  
014.08.012  
-1579-3  
011.11.020  
9  
10.1002/jcla.23272  
019.09.008  
2020.109871  
9.100673

070  
070  
070  
1-1093-9  
1-1093-910.1038/s41419-018-1093-9  
CCR-18-165610.1158/1078-0432.CCR-18-1656  
42910.18632/aging.103429  
1.07.04010.1016/j.bbrc.2021.07.040  
me.0068291  
6.2012.02220.x10.1111/j.1349-7006.2012.02220.x  
019.07.070  
i-4559-8  
0589110.15252/emmm.201505891

10.1038/ncomms6691  
6410.3892/o1.2017.7664  
7.03.162  
020.04.020  
018.05.048  
1-1415-6  
1-01670-3  
7.03.16210.1016/j.bbrc.2017.03.162  
1-00736-4  
2011.08.014  
2012.08.024  
2.10.019  
0.1002/ijc.25445

85  
1-0618-010.1186/s13045-018-0618-0  
-02153-x

92  
92  
60  
046  
021.05.004  
17.02.004  
0.144518  
016.04.004  
.11.357  
.11.357

612  
66  
705762  
i.461  
15061902533715  
018.1560203  
8-0141  
01906\_18183  
902  
6  
610.1155/2014/794756  
t.2157

15061902533715

018.1560203  
01906\_18183  
902  
r. 2019. 05. 012  
020.110799  
i149  
92  
020.173660  
7. 03. 021  
7. 03. 021  
7. 03. 021  
8. 03. 013  
8. 03. 013  
021. 04. 001

88  
8. 03. 01310. 1016/j. gene. 2018. 03. 013  
8. 03. 01310. 1016/j. gene. 2018. 03. 013  
530  
109288  
020. 08. 012  
0. 04. 002  
'(01)00098-3  
ence. 2012. 11. 018  
ence. 2012. 11. 018  
i. 2013. 03. 022  
2. 320

01170C  
01170C  
046  
42  
-03866-y  
038110. 3892/o1. 2019. 10381  
013. 06. 242  
96  
96  
96  
96  
9610. 1155/2020/3181596  
012. 11. 006  
2012. 06. 049  
i-2123-6  
i-2123-6  
i-2123-6  
i-2123-6  
022. 2078614  
r. 2022. 06. 010  
f-1086-z  
i-2205-5  
i-2205-5  
i-2205-5  
i-2205-510. 1007/s00432-016-2205-5

02.14510.21037/atm.2020.02.145  
4.09.010  
66  
731  
731  
731  
731  
731  
731  
731  
60  
3149990183  
6010.3892/or.2011.1360  
666201019102207  
-01002-3  
;  
017.05.008  
-02569-x  
101266610.1177/11795549211012666  
0.101451  
0.08.004  
020.100841  
56  
288  
288  
4  
020.100841  
t.1186110.18632/oncotarget.11861  
-0033-810.1038/s41408-017-0033-8  
4  
1.04.009  
1.04.009  
1.04.009  
1.04.009  
9200  
8.08.047  
8.08.047  
8.08.047  
8.08.047  
8.08.005  
8.08.005  
014.07.005  
  
-0953-0  
-11-20  
me.0026390  
2013.204  
i-4044-4  
i-4044-4

i-4044-410.1007/s13277-015-4044-4  
i-4044-410.1007/s13277-015-4044-4

1. 04. 00910. 1016/j. bbrc. 2021. 04. 009  
1. 04. 00910. 1016/j. bbrc. 2021. 04. 009

37

49

2513

i-4017-7

694469310. 1109/EMBC. 2014. 6944693

018. 10. 061

. 117

10. 1002/cbin. 10995

43

et. 673910. 18632/oncotarget. 6739

019. 09. 051

019. 09. 051

!-00736-4

!-00736-4

!-00736-4

!-00736-4

!-00736-4

!-00736-4

!-00736-4

07. 05. 028

-0981-y

0. 1002/jcp. 27079

5610. 2147/CMAR. S203656

. 119499

015. 11. 034

017. 08. 084

015. 11. 03410. 1016/j. ygyno. 2015. 11. 034

4. 01. 014

02200

02200

02200

02200

02200

016. 10. 003

020. 11. 016

020. 188405

2017. 07. 056

2010. 12. 027

2012. 03. 006

005. 12. 033

003. 10. 028

003. 10. 028

013. 07. 002

015. 02. 011

'-0134-z

819606

i33

-00519-x

-00519-x

-00519-x

-00519-x

-00519-x

9-305

9-305

3181de3068

me. 0128886

03918

02926

011. 06. 00810. 1016/j. arcmed. 2011. 06. 008

017. 06. 08910. 1016/j. biopha. 2017. 06. 089

1-1119-x10. 1186/s13046-019-1119-x

-00519-x10. 1007/s13577-021-00519-x10. 3322/caac. 2133810. 1007/s11748-013-0246-010. 1  
2012. 03. 006

819606

i-2253-7

0944

021. 188552

021. 188552

i-5052-8

i8

i8

i8

i8

i8

i8

0810. 12659/MSM. 909458

7. 02. 120

0. 118874

7. 01. 008

0. 04. 003

0. 04. 003

0. 04. 003

4. 09. 010

'-9788-3

'-9788-3

'-9788-3

01901\_16773



02002\_20195  
08410.1093/neuonc/nou084  
08410.1093/neuonc/nou084  
7.02.12010.1016/j.bbrc.2017.02.120  
7.02.12010.1016/j.bbrc.2017.02.120  
7.02.12010.1016/j.bbrc.2017.02.120  
-9788-310.1007/s12015-017-9788-3  
-9788-3  
-9788-310.1007/s12015-017-9788-3  
01901\_16773

7.02.12010.1016/j.bbrc.2017.02.120  
-01091-6  
74210.3892/ol.2021.12742  
021.173923  
666170601100633  
i-0596-4  
0.1111/jop.12711  
675

022.08.014

atholToxicolOncol.2021039471  
-04140-6  
-04140-6  
-04140-6  
-005270  
009.10.047  
i-1082-z  
i-1082-z  
019.109462  
9.07.012  
019.109462  
9.07.012  
9.07.012  
9.07.012  
i-01390-w  
0.1111/jcmm.14171  
1252310.1002/1878-0261.12523  
1252310.1002/1878-0261.12523

0339  
i-03154-w  
1.00176  
1.00176  
1.00176  
86

77  
i-00535-9  
i-00535-9  
017.05.018  
2.12.002

99  
29  
29  
29  
96  
89  
89  
89  
79  
79  
79  
79  
79  
79  
79  
79  
79  
79  
79  
79  
8910. 1038/bjc. 2013. 789  
7910. 3892/or. 2015. 4479  
9610. 1155/2020/3181596  
021. 201033110. 1080/16078454. 2021. 2010331  
021. 2010331  
021. 2010331  
021. 2010331  
021. 2010331  
021. 2010331  
0. 118725  
io. 2021. 04. 001  
0-00054-1  
0-00054-1  
0-01523-1  
0-1988-6  
2020. 109858

i. 461  
734114  
1196

0. 1111/cas. 14356  
666211213122619  
7. 05. 030  
0666220124120208

26  
6010. 3390/i jms15033560  
9200  
9200

11-135  
ne. 0029043  
ne. 0029043  
519010. 1038/sj. bjc. 6605190  
ne. 002904310. 1371/journal. pone. 0029043  
1. 04. 021  
1. 04. 021  
1. 04. 021  
1. 04. 021  
1. 04. 02110. 1016/j. ejca. 2011. 04. 021  
1(00)00338-5  
chem. 2019. 02. 013  
4333  
-0586-y  
21. 04. 028  
21. 04. 028  
0. 08. 004  
9. 07. 004  
9. 07. 004  
9. 07. 004  
460  
460

018. 1502574  
t. 1925610. 18632/oncotarget. 19256  
018. 03. 02810. 1016/j. biopha. 2018. 03. 028  
5510. 2147/PGPM. S302755  
5510. 2147/PGPM. S302755  
20610. 3390/genes12081206  
021. 04. 008  
0. 1002/jcb. 28558  
0. 1002/jcb. 28558  
0. 10. 031  
2. 01. 003  
0. 10. 03110. 1016/j. omtn. 2020. 10. 031  
-02538-4  
01806-15269  
01811-16381  
01905\_17797

t. 3885  
8. 04. 005  
8. 12. 002  
014. 08. 007  
015. 1070990  
018. 03. 028  
018. 03. 028  
-00258-510. 1038/s41417-020-00258-510. 1038/nrclinonc. 2013. 19710. 1016/j. beha. 2018. 0  
-00258-5  
-1782-910. 1007/s00404-010-1782-9  
4. 03. 135  
016. 10. 035

et. 754510.18632/oncotarget. 7545  
8.04.129  
8.04.129  
8.04.129  
8.04.129  
019.09.001  
1.04.093  
8.04.12910.1016/j.bbrc.2018.04.129  
8.04.12910.1016/j.bbrc.2018.04.129  
8.04.12910.1016/j.bbrc.2018.04.129  
1-07288-2  
9.103337  
3.07.029  
52  
1-0405-9  
0.1002/hed.21648  
52  
  
1-06800-4  
21.188569  
018.01.055  
  
0142.2018  
1-0921-z  
10.1242/bio.015008  
910.2147/OTT.S128819  
  
0.1002/cam4.3248  
73  
59R  
59R  
59R  
59R  
2007\_22260  
021.1949132  
021.1949132  
1-0149-x  
1-0149-x  
4203  
  
98  
016.06.001  
1.12.009  
088110.3390/cancers7040881  
4810.1155/2019/6131548  
4810.1155/2019/6131548  
0161  
0161  
24  
24  
0.7150/jca.52115  
-00994-x  
37  
37

1-8507-9  
107  
15. 5. 119610. 3349/ymj. 2014. 55. 5. 1196  
15. 5. 119610. 3349/ymj. 2014. 55. 5. 1196  
15. 5. 119610. 3349/ymj. 2014. 55. 5. 1196  
1-0139-610. 1007/s12013-014-0139-6  
1-0139-610. 1007/s12013-014-0139-6  
1-0139-610. 1007/s12013-014-0139-6  
10710. 3892/or. 2015. 3807  
10710. 3892/or. 2015. 3807  
1. 2015. 03. 02310. 1016/j. brainres. 2015. 03. 023  
10. 1111/cas. 13538  
18910. 2147/CMAR. S174889

169889  
1r. 2015. 10. 003  
110. 1093/nar/gku876  
2019. 04. 002  
1013. 08. 019  
1013. 08. 019  
1016. 05. 030  
1310  
192  
13  
183  
183  
183  
183  
183  
183  
18310. 1038/onc. 2012. 183  
18310. 1038/onc. 2012. 183  
11. 100797  
1  
1urg. 2016. 06. 303  
1-1375-1  
1one. 0100127

1. 00176  
171205  
13. 2010. 01710. x10. 1111/j. 1440-1843. 2010. 01710. x  
184210. 3892/mmr. 2013. 1842  
1014. 140607  
2020. 04. 041  
1020. 110768  
12. 11. 002  
1i. 194  
1025

15. 2. 577

0156871

1012. 10. 00810. 1016/j. canlet. 2012. 10. 008

007762310. 1371/journal. pone. 0077623

015687110. 1371/journal. pone. 0156871

19410. 1038/cddis. 2016. 194

1545218788883910. 3727/096504018X15452187888839

025

-09979-x

0000001826

02

016. 03. 036

-04249-4

051

051

051

046

-13-21

05010

019. 01. 06610. 1016/j. ebiom. 2019. 01. 066

i-4587-4

i-4587-4

010. 01. 01010. 1016/j. biopha. 2010. 01. 010

010. 01. 01010. 1016/j. biopha. 2010. 01. 010











1038/nrc393210. 1016/j. semcancer. 2021. 03. 01410. 1038/nrd. 2016. 24610. 1016/S1470-2045



85-610. 3390/cells809095710. 3390/biom912078910. 1517/14740338. 6. 5. 60910. 18632/oncot  
85-610. 3390/cells809095710. 3390/biom912078910. 1517/14740338. 6. 5. 60910. 18632/oncot















doi:10.1056/NEJMoa111208810.1371/journal.pone.010600710.1016/j.canlet.2004.01.03810.101































1710(98)00038-310. 3109/07388551. 2015. 101595710. 1038/nature0592510. 1080/15548627. 20



































21051412595510.3390/ijms2205265210.1002/jcp.2767010.1007/s11033-021-06193-410.103  
21051412595510.3390/ijms2205265210.1002/jcp.2767010.1007/s11033-021-06193-410.103









016/j.athoracsur.2018.02.01810.21037/cco.2017.07.0210.1016/j.oraloncology.2008.06







17. 01410. 3747/co. 26. 542110. 1182/blood-2014-05-57718910. 1083/jcb. 152. 6. 124710. 1016/

















(11) 70067-510. 1038/s41419-019-1382-y10. 1002/2211-5463. 1224810. 3389/fphar. 2



.arXiv:1607.03910v1 [math.CO] 10 Jul 2016  
.arXiv:1607.03910v1 [math.CO] 10 Jul 2016















6/bs. acr. 2017. 11. 00110. 1038/onc. 2011. 38410. 1016/j. molcel. 2018. 06. 03410. 109



































































8/sigtrans.2015.410.1016/j.biopha.2018.10.14810.3389/fcell.2020.0054010.32  
8/sigtrans.2015.410.1016/j.biopha.2018.10.14810.3389/fcell.2020.0054010.32









i.00210.1016/j.tox.2006.07.01110.1016/j.toxlet.2013.10.00410.1289/ehp.09010







'S0378-1119(02)00928-910.1074/jbc.M50391520010.1111/j.1742-4658.2006.05216.
