# Supplementary material for: Role of PPARG in Chemosensitivity-Regulating Network for Hypopharyngeal Squamous Cell Carcinoma
Source: Hindawi journal article supplement (doi:10.1155/2023/6019318), 2023-09-25
Supplement: f2 [file 6019318.f2.pdf]

## Ref info supporting the chemosensitivity inhibitors

| Relation Name                                        | PMID     | DOI                          |
|------------------------------------------------------|----------|------------------------------|
| negative Regulation: BIRC2 ---  chemosensitivity     | 29567488 | 10.1016/j.biocel.2018.03.01  |
| negative Regulation: BIRC2 ---  chemosensitivity     | 26168135 | 10.3727/096504015X142981229  |
| negative Regulation: BIRC2 ---  chemosensitivity     | 26168135 | 10.3727/096504015X142981229  |
| negative Regulation: BIRC2 ---  chemosensitivity     | 26168135 | 10.3727/096504015X142981229  |
| negative Regulation: BIRC2 ---  chemosensitivity     | 26168135 | 10.3727/096504015X142981229  |
| negative Regulation: BIRC2 ---  chemosensitivity     | 26168135 | 10.3727/096504015X142981229  |
| negative Regulation: LINC00461 ---  chemosensitivity | 33869744 | 10.1016/j.omto.2021.01.0081  |
| negative Regulation: KRT81 ---  chemosensitivity     | 34591651 | 10.1089/dna.2021.0317        |
| negative Regulation: KRT81 ---  chemosensitivity     | 34591651 | 10.1089/dna.2021.0317        |
| negative Regulation: MIR182 ---  chemosensitivity    | 31540771 | 10.1016/j.prp.2019.152603    |
| negative Regulation: MIR182 ---  chemosensitivity    | 31128298 | 10.1016/j.semcancer.2019.05  |
| negative Regulation: MIR182 ---  chemosensitivity    | 26216350 | 10.1016/j.humphath.2015.06.0 |
| negative Regulation: MIR182 ---  chemosensitivity    | 29925897 | 10.1038/s41417-018-0031-4    |
| negative Regulation: MIR182 ---  chemosensitivity    | 31115013 | 10.26355/eurrev_201905_1781  |
| negative Regulation: MIR182 ---  chemosensitivity    | 33437365 |                              |
| negative Regulation: MIR182 ---  chemosensitivity    | 25012722 | 10.1186/1746-1596-9-14310.1  |
| negative Regulation: MIR182 ---  chemosensitivity    | 31697978 | 10.1016/j.canlet.2019.10.04  |
| negative Regulation: STIM1 ---  chemosensitivity     | 28326487 | 10.1007/s13577-017-0167-9    |
| negative Regulation: GAA ---  chemosensitivity       | 33931930 | 10.1111/cas.1492110.1111/ca  |
| negative Regulation: BUB3 ---  chemosensitivity      | 33872216 | 10.18632/aging.202944        |
| negative Regulation: BUB3 ---  chemosensitivity      | 30866167 | 10.1111/odi.1308910.1111/od  |
| negative Regulation: TRIM37 ---  chemosensitivity    | 29163677 | 10.3892/ol.2017.705910.3892  |
| negative Regulation: STAT3 ---  chemosensitivity     | 22205702 | 10.1074/jbc.M111.295964      |
| negative Regulation: STAT3 ---  chemosensitivity     | 30145375 | 10.1016/j.ejmech.2018.08.03  |
| negative Regulation: STAT3 ---  chemosensitivity     | 24076095 | 10.1016/j.mce.2013.08.019    |
| negative Regulation: STAT3 ---  chemosensitivity     | 32160976 | 10.1016/j.canlet.2020.03.00  |
| negative Regulation: STAT3 ---  chemosensitivity     | 28011380 | 10.1016/j.biopha.2016.12.03  |
| negative Regulation: STAT3 ---  chemosensitivity     | 33378975 | 10.1016/j.biopha.2020.11107  |
| negative Regulation: STAT3 ---  chemosensitivity     | 30668440 | 10.1016/j.phymed.2018.06.03  |
| negative Regulation: STAT3 ---  chemosensitivity     | 29175114 | 10.1016/j.phrs.2017.11.024   |
| negative Regulation: STAT3 ---  chemosensitivity     | 20026083 | 10.1016/j.bcp.2009.12.014    |
| negative Regulation: STAT3 ---  chemosensitivity     | 21549414 | 10.1016/j.acthis.2011.04.00  |
| negative Regulation: STAT3 ---  chemosensitivity     | 21549414 | 10.1016/j.acthis.2011.04.00  |
| negative Regulation: STAT3 ---  chemosensitivity     | 23340171 | 10.1016/j.canlet.2013.01.00  |
| negative Regulation: STAT3 ---  chemosensitivity     | 23246576 | 10.1016/j.bbagen.2012.12.00  |
| negative Regulation: STAT3 ---  chemosensitivity     | 24735751 | 10.1016/j.canlet.2014.04.00  |
| negative Regulation: STAT3 ---  chemosensitivity     | 25892518 | 10.1016/j.bbrc.2015.04.040   |
| negative Regulation: STAT3 ---  chemosensitivity     | 27130669 | 10.1016/j.canlet.2016.04.03  |
| negative Regulation: STAT3 ---  chemosensitivity     | 17531096 |                              |
| negative Regulation: STAT3 ---  chemosensitivity     | 27725789 | 10.1155/2016/5894347         |
| negative Regulation: STAT3 ---  chemosensitivity     | 29293118 | 10.1097/CAD.000000000000058  |
| negative Regulation: STAT3 ---  chemosensitivity     | 30252677 | 10.1172/JCI120156            |
| negative Regulation: STAT3 ---  chemosensitivity     | 22961117 | 10.1055/s-0032-1315303       |
| negative Regulation: STAT3 ---  chemosensitivity     | 21887474 | 10.3892/or.2011.1396         |
| negative Regulation: STAT3 ---  chemosensitivity     | 22205702 | 10.1074/jbc.M111.295964      |
| negative Regulation: STAT3 ---  chemosensitivity     | 22205702 | 10.1074/jbc.M111.295964      |
| negative Regulation: STAT3 ---  chemosensitivity     | 24220695 | 10.1038/bjc.2013.673         |
| negative Regulation: STAT3 ---  chemosensitivity     |          |                              |
| negative Regulation: STAT3 ---  chemosensitivity     | 25867391 | 10.4238/2015.March.30.3      |
| negative Regulation: STAT3 ---  chemosensitivity     | 18059167 | 10.4161/cbt.6.12.4970        |

|                                                  |          |                             |
|--------------------------------------------------|----------|-----------------------------|
| negative Regulation: STAT3 ---  chemosensitivity | 20106947 | 10.1093/toxsci/kfq02810.109 |
| negative Regulation: STAT3 ---  chemosensitivity | 21685938 | 10.1038/onc.2011.22210.1038 |
| negative Regulation: STAT3 ---  chemosensitivity | 22205702 | 10.1074/jbc.M111.29596410.1 |
| negative Regulation: STAT3 ---  chemosensitivity | 25867391 | 10.4238/2015.March.30.310.4 |
| negative Regulation: STAT3 ---  chemosensitivity | 25908586 | 10.1158/0008-5472.CAN-14-29 |
| negative Regulation: STAT3 ---  chemosensitivity | 26121837 |                             |
| negative Regulation: STAT3 ---  chemosensitivity | 27373041 |                             |
| negative Regulation: STAT3 ---  chemosensitivity | 27797972 | 10.1158/1078-0432.CCR-16-13 |
| negative Regulation: STAT3 ---  chemosensitivity | 34571081 | 10.1016/j.canlet.2021.09.03 |
| negative Regulation: STAT3 ---  chemosensitivity |          | 10.1097/CAD.000000000000058 |
| negative Regulation: STAT3 ---  chemosensitivity |          | 10.1172/JCI120156           |
| negative Regulation: STAT3 ---  chemosensitivity |          | 10.3390/ijms19123890        |
| negative Regulation: STAT3 ---  chemosensitivity | 34397325 | 10.2174/1386207324666210816 |
| negative Regulation: STAT3 ---  chemosensitivity | 35353612 | 10.1089/dna.2021.0936       |
| negative Regulation: MACC1 ---  chemosensitivity | 26936749 | 10.12659/MSM.897055         |
| negative Regulation: MACC1 ---  chemosensitivity | 26936749 | 10.12659/MSM.897055         |
| negative Regulation: MACC1 ---  chemosensitivity | 28339092 | 10.3892/or.2017.5519        |
| negative Regulation: MACC1 ---  chemosensitivity | 28339092 | 10.3892/or.2017.5519        |
| negative Regulation: MACC1 ---  chemosensitivity | 28339092 | 10.3892/or.2017.5519        |
| negative Regulation: MACC1 ---  chemosensitivity | 26794135 | 10.3892/or.2016.4585        |
| negative Regulation: MACC1 ---  chemosensitivity | 26794135 | 10.3892/or.2016.458510.3892 |
| negative Regulation: MACC1 ---  chemosensitivity | 28339092 | 10.3892/or.2017.551910.3892 |
| negative Regulation: KRT7 ---  chemosensitivity  |          |                             |
| negative Regulation: KRT7 ---  chemosensitivity  |          |                             |
| negative Regulation: KRT7 ---  chemosensitivity  |          |                             |
| negative Regulation: KRT7 ---  chemosensitivity  |          |                             |
| negative Regulation: KRT7 ---  chemosensitivity  |          |                             |
| negative Regulation: KRT7 ---  chemosensitivity  | 31317696 |                             |
| negative Regulation: SEC62 ---  chemosensitivity | 33858476 | 10.1186/s13046-021-01934-6  |
| negative Regulation: SEC62 ---  chemosensitivity | 33858476 | 10.1186/s13046-021-01934-6  |
| negative Regulation: SEC62 ---  chemosensitivity | 33858476 | 10.1186/s13046-021-01934-6  |
| negative Regulation: CLU ---  chemosensitivity   | 28784314 | 10.1016/j.cbi.2017.08.002   |
| negative Regulation: CLU ---  chemosensitivity   | 11502446 | 10.1016/S0090-4295(01)01241 |
| negative Regulation: CLU ---  chemosensitivity   | 12350509 | 10.1016/S0090-4295(02)01806 |
| negative Regulation: CLU ---  chemosensitivity   | 19903745 |                             |
| negative Regulation: CLU ---  chemosensitivity   | 15689620 |                             |
| negative Regulation: CLU ---  chemosensitivity   | 25778071 | 10.1186/s12957-015-0501-1   |
| negative Regulation: CLU ---  chemosensitivity   | 28471806 | 10.1097/CAD.000000000000050 |
| negative Regulation: CLU ---  chemosensitivity   | 31433751 | 10.2174/1389201020666190821 |
| negative Regulation: CLU ---  chemosensitivity   | 32459606 | 10.2174/1389557520666200526 |
| negative Regulation: CLU ---  chemosensitivity   | 32459606 | 10.2174/1389557520666200526 |
| negative Regulation: CLU ---  chemosensitivity   | 32459606 | 10.2174/1389557520666200526 |
| negative Regulation: CLU ---  chemosensitivity   | 34212987 | 10.3892/mmr.2021.12267      |
| negative Regulation: CLU ---  chemosensitivity   | 22895628 | 10.3892/mmr.2012.1017       |
| negative Regulation: CLU ---  chemosensitivity   | 21609464 | 10.1186/1477-7819-9-59      |
| negative Regulation: CLU ---  chemosensitivity   | 25106434 | 10.1186/1477-7819-12-255    |
| negative Regulation: CLU ---  chemosensitivity   | 25343293 | 10.1080/15287394.2014.95176 |
| negative Regulation: CLU ---  chemosensitivity   | 11571636 | 10.1038/sj.neo.7900174      |
| negative Regulation: CLU ---  chemosensitivity   | 16373699 | 10.1158/1535-7163.MCT-05-01 |
| negative Regulation: CLU ---  chemosensitivity   | 21630085 | 10.1007/s00280-011-1682-010 |
| negative Regulation: CLU ---  chemosensitivity   | 22895628 | 10.3892/mmr.2012.101710.389 |
| negative Regulation: CLU ---  chemosensitivity   | 22895628 | 10.3892/mmr.2012.101710.389 |
| negative Regulation: CLU ---  chemosensitivity   | 22967941 | 10.1186/1756-9966-31-7310.1 |
| negative Regulation: CLU ---  chemosensitivity   | 25106434 | 10.1186/1477-7819-12-25510. |

|                                                     |          |                             |
|-----------------------------------------------------|----------|-----------------------------|
| negative Regulation: CLU ---  chemosensitivity      | 25884382 | 10.1186/s12957-015-0501-110 |
| negative Regulation: CLU ---  chemosensitivity      | 26988917 | 10.18632/oncotarget.810510. |
| negative Regulation: CLU ---  chemosensitivity      | 34212987 | 10.3892/mmr.2021.1226710.38 |
| negative Regulation: CLU ---  chemosensitivity      |          | 10.1097/CAD.000000000000050 |
| negative Regulation: CLU ---  chemosensitivity      | 25106434 | 10.1186/1477-7819-12-255    |
| negative Regulation: CLU ---  chemosensitivity      | 25778071 | 10.1186/s12957-015-0501-1   |
| negative Regulation: CLU ---  chemosensitivity      |          | 10.2174/1389201020666190821 |
| negative Regulation: CLU ---  chemosensitivity      |          | 10.33549/physiolres.934908  |
| negative Regulation: H2AZ1 ---  chemosensitivity    | 35968782 | 10.1172/JCI158446           |
| negative Regulation: FKBP5 ---  chemosensitivity    | 21530399 | 10.1016/j.coph.2011.04.001  |
| negative Regulation: FKBP5 ---  chemosensitivity    | 23936393 | 10.1371/journal.pone.007021 |
| negative Regulation: FKBP5 ---  chemosensitivity    | 24061475 | 10.1128/MCB.00695-13        |
| negative Regulation: FKBP5 ---  chemosensitivity    | 32964982 | 10.26355/eurrev_202009_2283 |
| negative Regulation: FKBP5 ---  chemosensitivity    | 35354796 | 10.1038/s41419-022-04727-7  |
| negative Regulation: NOTCH4 ---  chemosensitivity   | 30497876 | 10.1016/j.prp.2018.10.013   |
| negative Regulation: NOTCH4 ---  chemosensitivity   | 1150     | 10.1016/j.prp.2018.10.013   |
| negative Regulation: KDM5B ---  chemosensitivity    | 32440821 | 10.1007/s12031-020-01587-8  |
| negative Regulation: KDM5B ---  chemosensitivity    | 25951238 | 10.1371/journal.pone.012534 |
| negative Regulation: TRPA1 ---  chemosensitivity    | 34015320 | 10.1016/j.ejphar.2021.17418 |
| negative Regulation: TRPA1 ---  chemosensitivity    | 31682917 | 10.1016/j.freeradbiomed.201 |
| negative Regulation: TRPA1 ---  chemosensitivity    | 29805077 | 10.1016/j.ccell.2018.05.001 |
| negative Regulation: TRPA1 ---  chemosensitivity    |          | 10.1016/j.apsb.2021.11.001  |
| negative Regulation: RPS6KB1 ---  chemosensitivity  | 25573956 | 10.1158/1535-7163.MCT-14-06 |
| negative Regulation: CBR3-AS1 ---  chemosensitivity | 35466320 | 10.1155/2022/2260211        |
| negative Regulation: GRM5 ---  chemosensitivity     | 35396501 | 10.1038/s41417-022-00465-2  |
| negative Regulation: GRM5 ---  chemosensitivity     | 35396501 | 10.1038/s41417-022-00465-2  |
| negative Regulation: GRM5 ---  chemosensitivity     | 35396501 | 10.1038/s41417-022-00465-2  |
| negative Regulation: GRM5 ---  chemosensitivity     | 35396501 | 10.1038/s41417-022-00465-2  |
| negative Regulation: GRM5 ---  chemosensitivity     | 35396501 | 10.1038/s41417-022-00465-2  |
| negative Regulation: GRM5 ---  chemosensitivity     | 35396501 | 10.1038/s41417-022-00465-2  |
| negative Regulation: GRM5 ---  chemosensitivity     | 35396501 | 10.1038/s41417-022-00465-2  |
| negative Regulation: GRM5 ---  chemosensitivity     | 35396501 | 10.1038/s41417-022-00465-2  |
| negative Regulation: CCND1 ---  chemosensitivity    | 24480319 | 10.1016/j.bbcan.2014.01.007 |
| negative Regulation: CCND1 ---  chemosensitivity    | 27155130 | 10.1016/j.dnarep.2016.04.01 |
| negative Regulation: CCND1 ---  chemosensitivity    | 13679454 |                             |
| negative Regulation: CCND1 ---  chemosensitivity    | 24100731 | 10.3892/ijo.2013.2119       |
| negative Regulation: CCND1 ---  chemosensitivity    | 24303084 | 10.1371/journal.pone.008247 |
| negative Regulation: CCND1 ---  chemosensitivity    | 25881299 | 10.1186/s12885-015-1240-y   |
| negative Regulation: CCND1 ---  chemosensitivity    |          | 10.3727/096368915X687787    |
| negative Regulation: CCND1 ---  chemosensitivity    | 16586549 |                             |
| negative Regulation: CCND1 ---  chemosensitivity    | 16586549 |                             |
| negative Regulation: CCND1 ---  chemosensitivity    | 19020753 |                             |
| negative Regulation: CCND1 ---  chemosensitivity    | 28990111 | 10.3892/mmr.2017.7732       |
| negative Regulation: EIF5A2 ---  chemosensitivity   | 27097942 |                             |
| negative Regulation: EIF5A2 ---  chemosensitivity   | 28885268 | 10.1097/CAD.000000000000055 |
| negative Regulation: EIF5A2 ---  chemosensitivity   | 33174013 | 10.3892/ijo.2020.5143       |
| negative Regulation: EIF5A2 ---  chemosensitivity   | 25071013 | 10.18632/oncotarget.2236    |
| negative Regulation: EIF5A2 ---  chemosensitivity   | 26317793 | 10.18632/oncotarget.458110. |
| negative Regulation: EIF5A2 ---  chemosensitivity   | 26581310 | 10.1186/s12935-015-0250-910 |
| negative Regulation: EIF5A2 ---  chemosensitivity   | 35718769 | 10.1186/s13048-022-00998-y  |
| negative Regulation: GSTP1 ---  chemosensitivity    | 31026507 | 10.1016/j.ejps.2019.04.021  |
| negative Regulation: GSTP1 ---  chemosensitivity    | 28062686 | 10.1152/physiolgenomics.000 |
| negative Regulation: GSTP1 ---  chemosensitivity    | 29328427 | 10.3892/ijmm.2018.3382      |

|          |                     |     |                  |          |                             |
|----------|---------------------|-----|------------------|----------|-----------------------------|
| negative | Regulation: GSTP1   | --- | chemosensitivity | 29328427 | 10.3892/ijmm.2018.3382      |
| negative | Regulation: GSTP1   | --- | chemosensitivity | 31024008 | 10.1038/s41419-019-1588-z   |
| negative | Regulation: GSTP1   | --- | chemosensitivity | 32713331 | 10.2174/1381612826666200724 |
| negative | Regulation: GSTP1   | --- | chemosensitivity | 26910073 | 10.1007/978-1-4939-3347-1_9 |
| negative | Regulation: GSTP1   | --- | chemosensitivity | 11436358 |                             |
| negative | Regulation: GSTP1   | --- | chemosensitivity | 17513610 | 10.1158/1535-7163.MCT-06-05 |
| negative | Regulation: GSTP1   | --- | chemosensitivity | 24460306 | 10.7314/apjcp.2013.14.12.73 |
| negative | Regulation: GSTP1   | --- | chemosensitivity | 25010864 | 10.1038/bjc.2014.38610.1038 |
| negative | Regulation: GSTP1   | --- | chemosensitivity | 25010864 | 10.1038/bjc.2014.38610.1038 |
| negative | Regulation: GSTP1   | --- | chemosensitivity | 26711214 |                             |
| negative | Regulation: FGF9    | --- | chemosensitivity | 30999114 | 10.1016/j.biopha.2019.10866 |
| negative | Regulation: RPS6KA2 | --- | chemosensitivity | 23108403 | 10.1038/onc.2012.472        |
| negative | Regulation: UCA1    | --- | chemosensitivity | 30825424 | 10.1016/j.clinbiochem.2019. |
| negative | Regulation: UCA1    | --- | chemosensitivity | 33901464 | 10.1016/j.ejphar.2021.17411 |
| negative | Regulation: UCA1    | --- | chemosensitivity | 30107990 | 10.1016/j.prp.2018.07.036   |
| negative | Regulation: UCA1    | --- | chemosensitivity | 29674277 | 10.1016/j.biopha.2018.03.13 |
| negative | Regulation: UCA1    | --- | chemosensitivity | 32146422 | 10.1016/j.drug.2020.100683  |
| negative | Regulation: UCA1    | --- | chemosensitivity | 31611036 | 10.1016/j.oooo.2019.08.011  |
| negative | Regulation: UCA1    | --- | chemosensitivity | 29441929 | 10.1691/ph.2016.6625        |
| negative | Regulation: UCA1    | --- | chemosensitivity | 29441929 | 10.1691/ph.2016.6625        |
| negative | Regulation: UCA1    | --- | chemosensitivity | 29441929 | 10.1691/ph.2016.6625        |
| negative | Regulation: UCA1    | --- | chemosensitivity | 29441929 | 10.1691/ph.2016.6625        |
| negative | Regulation: UCA1    | --- | chemosensitivity | 29441929 | 10.1691/ph.2016.6625        |
| negative | Regulation: UCA1    | --- | chemosensitivity | 29441929 | 10.1691/ph.2016.6625        |
| negative | Regulation: UCA1    | --- | chemosensitivity | 29441929 | 10.1691/ph.2016.6625        |
| negative | Regulation: UCA1    | --- | chemosensitivity | 29367594 | 10.1038/s41419-017-0113-5   |
| negative | Regulation: UCA1    | --- | chemosensitivity | 30015983 | 10.3892/or.2018.6573        |
| negative | Regulation: UCA1    | --- | chemosensitivity | 30868851 | 10.7754/Clin.Lab.2018.18073 |
| negative | Regulation: UCA1    | --- | chemosensitivity | 31173289 | 10.26355/eurrev_201905_1792 |
| negative | Regulation: UCA1    | --- | chemosensitivity | 31528122 | 10.1186/s12935-019-0934-7   |
| negative | Regulation: UCA1    | --- | chemosensitivity | 33936199 | 10.1155/2021/5519720        |
| negative | Regulation: UCA1    | --- | chemosensitivity | 33936199 | 10.1155/2021/5519720        |
| negative | Regulation: UCA1    | --- | chemosensitivity | 27591936 | 10.1016/j.canlet.2016.08.01 |
| negative | Regulation: UCA1    | --- | chemosensitivity | 29441929 | 10.1691/ph.2016.662510.1691 |
| negative | Regulation: UCA1    | --- | chemosensitivity | 29441929 | 10.1691/ph.2016.662510.1691 |
| negative | Regulation: UCA1    | --- | chemosensitivity | 29441929 | 10.1691/ph.2016.662510.1691 |
| negative | Regulation: NIPBL   | --- | chemosensitivity | 29670369 | 10.2147/OTT.S15865510.2147/ |
| negative | Regulation: MIR93   | --- | chemosensitivity |          | 10.1016/j.febslet.2012.03.0 |
| negative | Regulation: MIR93   | --- | chemosensitivity | 32796817 | 10.1038/s41419-020-02855-61 |
| negative | Regulation: MIR93   | --- | chemosensitivity |          | 10.1016/j.febslet.2012.03.0 |
| negative | Regulation: MIR93   | --- | chemosensitivity |          | 10.1016/j.febslet.2012.03.0 |
| negative | Regulation: MIR93   | --- | chemosensitivity |          | 10.1016/j.febslet.2012.03.0 |
| negative | Regulation: MIR93   | --- | chemosensitivity | 22465665 | 10.1016/j.febslet.2012.03.0 |
| negative | Regulation: MIR93   | --- | chemosensitivity | 22465665 | 10.1016/j.febslet.2012.03.0 |
| negative | Regulation: MIR93   | --- | chemosensitivity | 22465665 | 10.1016/j.febslet.2012.03.0 |
| negative | Regulation: MIR93   | --- | chemosensitivity | 22465665 | 10.1016/j.febslet.2012.03.0 |
| negative | Regulation: MIR93   | --- | chemosensitivity | 25064468 | 10.1016/j.mce.2014.07.014   |
| negative | Regulation: MIR93   | --- | chemosensitivity | 26363097 | 10.1016/j.febslet.2015.08.0 |
| negative | Regulation: MIR93   | --- | chemosensitivity | 29327155 | 10.1007/s00404-018-4649-0   |
| negative | Regulation: MIR93   | --- | chemosensitivity | 30213291 | 10.14715/cmb/2018.64.11.12  |
| negative | Regulation: MIR93   | --- | chemosensitivity |          | 10.1042/BSR20181743         |
| negative | Regulation: MIR93   | --- | chemosensitivity | 23591839 | 10.3390/ijms14048213        |
| negative | Regulation: MIR93   | --- | chemosensitivity | 24512727 | 10.3727/096504013X138324733 |
| negative | Regulation: MIR93   | --- | chemosensitivity | 27099514 | 10.2147/OTT.S9739910.2147/C |

|                      |          |     |                  |          |                             |
|----------------------|----------|-----|------------------|----------|-----------------------------|
| negative Regulation: | MIR93    | --- | chemosensitivity | 27099514 | 10.2147/OTT.S9739910.2147/C |
| negative Regulation: | MIR93    | --- | chemosensitivity | 27185265 | 10.1242/bio.01555210.1242/b |
| negative Regulation: | MIR93    | --- | chemosensitivity | 32796817 | 10.1038/s41419-020-02855-61 |
| negative Regulation: | MIR93    | --- | chemosensitivity | 34292880 | 10.18632/aging.203298       |
| negative Regulation: | MIR432   | --- | chemosensitivity | 31246330 | 10.1111/bcpt.1328610.1111/b |
| negative Regulation: | LILRB2   | --- | chemosensitivity | 27070574 | 10.3390/ijms17040517        |
| negative Regulation: | LILRB2   | --- | chemosensitivity | 28571552 | 10.2174/1381612823666170601 |
| negative Regulation: | LILRB2   | --- | chemosensitivity | 27002147 | 10.1074/jbc.M115.700021     |
| negative Regulation: | LILRB2   | --- | chemosensitivity | 26448762 | 10.1155/2015/98907010.1155/ |
| negative Regulation: | LILRB2   | --- | chemosensitivity | 27002147 | 10.1074/jbc.M115.70002110.1 |
| negative Regulation: | LILRB2   | --- | chemosensitivity |          | 10.1074/jbc.M115.700021     |
| negative Regulation: | MAGED1   | --- | chemosensitivity | 29778424 | 10.1016/j.gene.2018.05.060  |
| negative Regulation: | CDC20    | --- | chemosensitivity | 27633058 | 10.3892/ijo.2016.3671       |
| negative Regulation: | CDC20    | --- | chemosensitivity | 27633058 | 10.3892/ijo.2016.3671       |
| negative Regulation: | CDC20    | --- | chemosensitivity | 29901174 | 10.3892/or.2018.6467        |
| negative Regulation: | CDC20    | --- | chemosensitivity | 31081056 | 10.3892/ijo.2019.4791       |
| negative Regulation: | CDC20    | --- | chemosensitivity | 27633058 | 10.3892/ijo.2016.367110.389 |
| negative Regulation: | CDC20    | --- | chemosensitivity | 33118830 | 10.4149/neo_2020_200614N629 |
| negative Regulation: | CDC20    | --- | chemosensitivity | 33118830 | 10.4149/neo_2020_200614N629 |
| negative Regulation: | CDC20    | --- | chemosensitivity | 33118830 | 10.4149/neo_2020_200614N629 |
| negative Regulation: | CDC20    | --- | chemosensitivity | 33118830 | 10.4149/neo_2020_200614N629 |
| negative Regulation: | CDC20    | --- | chemosensitivity | 33118830 | 10.4149/neo_2020_200614N629 |
| negative Regulation: | CDC20    | --- | chemosensitivity | 33118830 | 10.4149/neo_2020_200614N629 |
| negative Regulation: | MIR574   | --- | chemosensitivity | 31786621 | 10.1007/s00210-019-01772-6  |
| negative Regulation: | MIR574   | --- | chemosensitivity | 31786621 | 10.1007/s00210-019-01772-6  |
| negative Regulation: | MIR574   | --- | chemosensitivity | 31786621 | 10.1007/s00210-019-01772-6  |
| negative Regulation: | MIR574   | --- | chemosensitivity | 31786621 | 10.1007/s00210-019-01772-6  |
| negative Regulation: | MIR574   | --- | chemosensitivity | 31786621 | 10.1007/s00210-019-01772-6  |
| negative Regulation: | MIR574   | --- | chemosensitivity | 31786621 | 10.1007/s00210-019-01772-6  |
| negative Regulation: | MIR574   | --- | chemosensitivity | 31786621 | 10.1007/s00210-019-01772-6  |
| negative Regulation: | MIR574   | --- | chemosensitivity | 31786621 | 10.1007/s00210-019-01772-61 |
| negative Regulation: | MIR574   | --- | chemosensitivity | 31786621 | 10.1007/s00210-019-01772-61 |
| negative Regulation: | LOXL2    | --- | chemosensitivity | 31462706 | 10.1038/s41388-019-0969-1   |
| negative Regulation: | MIR10B   | --- | chemosensitivity | 31267531 | 10.1002/jcp.2904010.1002/jc |
| negative Regulation: | MIR10B   | --- | chemosensitivity | 35181582 | 10.21873/cgp.20308          |
| negative Regulation: | MIR10B   | --- | chemosensitivity | 36142861 | 10.3390/ijms231810952       |
| negative Regulation: | MAPKAPK2 | --- | chemosensitivity | 29704518 | 10.1016/j.canlet.2018.04.03 |
| negative Regulation: | MAPKAPK2 | --- | chemosensitivity | 20727903 | 10.1016/j.mrfmmm.2010.07.01 |
| negative Regulation: | MAPKAPK2 | --- | chemosensitivity |          |                             |
| negative Regulation: | MAPKAPK2 | --- | chemosensitivity | 29704518 | 10.1016/j.canlet.2018.04.03 |
| negative Regulation: | MAPKAPK2 | --- | chemosensitivity |          |                             |
| negative Regulation: | MUS81    | --- | chemosensitivity | 28347251 | 10.1177/1010428317694307    |
| negative Regulation: | MUS81    | --- | chemosensitivity | 28347251 | 10.1177/1010428317694307    |
| negative Regulation: | MUS81    | --- | chemosensitivity | 28347251 | 10.1177/1010428317694307    |
| negative Regulation: | MUS81    | --- | chemosensitivity | 28347251 | 10.1177/1010428317694307    |
| negative Regulation: | MUS81    | --- | chemosensitivity | 29393493 | 10.3892/or.2018.6229        |
| negative Regulation: | MUS81    | --- | chemosensitivity | 25364260 | 10.2147/OTT.S6433910.2147/C |
| negative Regulation: | MUS81    | --- | chemosensitivity | 26714930 | 10.1002/cam4.58810.1002/car |
| negative Regulation: | MUS81    | --- | chemosensitivity | 26714930 | 10.1002/cam4.58810.1002/car |
| negative Regulation: | MUS81    | --- | chemosensitivity | 27284361 | 10.3892/ol.2016.4489        |
| negative Regulation: | MUS81    | --- | chemosensitivity | 28291626 | 10.1016/j.clinre.2017.01.01 |
| negative Regulation: | ANPEP    | --- | chemosensitivity | 21354167 | 10.1053/j.gastro.2011.02.03 |
| negative Regulation: | ANPEP    | --- | chemosensitivity |          |                             |
| negative Regulation: | PCLAF    | --- | chemosensitivity | 27708548 | 10.1186/s12935-016-0353-y   |
| negative Regulation: | MECOM    | --- | chemosensitivity | 26742943 | 10.1016/j.jconrel.2015.12.C |
| negative Regulation: | MECOM    | --- | chemosensitivity | 29879503 | 10.1016/j.gene.2018.06.005  |

|                                                       |          |                             |
|-------------------------------------------------------|----------|-----------------------------|
| negative Regulation: MECOM ---  chemosensitivity      | 22295105 | 10.1371/journal.pone.003070 |
| negative Regulation: ETS1 ---  chemosensitivity       | 27525970 | 10.1016/j.biopha.2016.08.02 |
| negative Regulation: ETS1 ---  chemosensitivity       | 29950928 | 10.1186/s12935-018-0581-4   |
| negative Regulation: ETS1 ---  chemosensitivity       | 29950928 | 10.1186/s12935-018-0581-4   |
| negative Regulation: ETS1 ---  chemosensitivity       | 24602286 | 10.1186/1475-2867-14-22     |
| negative Regulation: ETS1 ---  chemosensitivity       | 24602286 | 10.1186/1475-2867-14-22     |
| negative Regulation: ETS1 ---  chemosensitivity       | 29950928 | 10.1186/s12935-018-0581-410 |
| negative Regulation: ETS1 ---  chemosensitivity       | 28672814 | 10.3390/ijms18071354        |
| negative Regulation: SPDEF ---  chemosensitivity      | 34139546 | 10.1016/j.phymed.2021.15360 |
| negative Regulation: B4GALT1 ---  chemosensitivity    | 23744354 | 10.1038/cddis.2013.186      |
| negative Regulation: HOXA5 ---  chemosensitivity      | 30267809 | 10.1016/j.gene.2018.09.051  |
| negative Regulation: HOXA5 ---  chemosensitivity      | 26397212 | 10.3892/mmr.2015.4331       |
| negative Regulation: HOXA5 ---  chemosensitivity      | 26397212 | 10.3892/mmr.2015.433110.389 |
| negative Regulation: HOXA5 ---  chemosensitivity      | 26397212 | 10.3892/mmr.2015.433110.389 |
| negative Regulation: GALNT14 ---  chemosensitivity    | 29227978 | 10.1159/000485400           |
| negative Regulation: GALNT14 ---  chemosensitivity    | 29227978 | 10.1159/00048540010.1159/00 |
| negative Regulation: GALNT14 ---  chemosensitivity    | 29227978 | 10.1159/00048540010.1159/00 |
| negative Regulation: GALNT14 ---  chemosensitivity    | 29227978 | 10.1159/00048540010.1159/00 |
| negative Regulation: AKT2 ---  chemosensitivity       | 32522594 | 10.1016/j.bcp.2020.114085   |
| negative Regulation: AKT2 ---  chemosensitivity       | 22771706 | 10.1016/j.brainres.2012.06. |
| negative Regulation: AKT2 ---  chemosensitivity       | 22771706 | 10.1016/j.brainres.2012.06. |
| negative Regulation: AKT2 ---  chemosensitivity       | 27163202 | 10.1016/j.yexmp.2016.05.003 |
| negative Regulation: AKT2 ---  chemosensitivity       | 26953242 | 10.2174/1389450117666160307 |
| negative Regulation: AKT2 ---  chemosensitivity       | 26709804 |                             |
| negative Regulation: PF4 ---  chemosensitivity        | 25822018 | 10.1172/JCI78752            |
| negative Regulation: PF4 ---  chemosensitivity        | 25822018 | 10.1172/JCI78752            |
| negative Regulation: PF4 ---  chemosensitivity        | 9116276  |                             |
| negative Regulation: PF4 ---  chemosensitivity        | 9116276  |                             |
| negative Regulation: USP2 ---  chemosensitivity       | 30918246 | 10.1038/s41419-019-1512-6   |
| negative Regulation: USP2 ---  chemosensitivity       | 35384881 | 10.1097/PAI.000000000000101 |
| negative Regulation: IL6R ---  chemosensitivity       | 25625841 | 10.3892/ijo.2015.2851       |
| negative Regulation: KDM5A ---  chemosensitivity      | 36566915 | 10.1016/j.ejphar.2022.17546 |
| negative Regulation: KDM5A ---  chemosensitivity      | 36566915 | 10.1016/j.ejphar.2022.17546 |
| negative Regulation: BAP1 ---  chemosensitivity       | 33872660 | 10.1016/j.lfs.2021.119504   |
| negative Regulation: MUC5B ---  chemosensitivity      | 26984395 | 10.3892/ijo.2016.3434       |
| negative Regulation: MUC5B ---  chemosensitivity      | 26984395 | 10.3892/ijo.2016.3434       |
| negative Regulation: CCN2 ---  chemosensitivity       | 33358571 | 10.1016/j.trecan.2020.12.00 |
| negative Regulation: CCN2 ---  chemosensitivity       | 28617438 | 10.1038/cddis.2017.248      |
| negative Regulation: CCN2 ---  chemosensitivity       | 28617438 | 10.1038/cddis.2017.248      |
| negative Regulation: CCN2 ---  chemosensitivity       | 28617438 | 10.1038/cddis.2017.248      |
| negative Regulation: CCN2 ---  chemosensitivity       | 28617438 | 10.1038/cddis.2017.248      |
| negative Regulation: CCN2 ---  chemosensitivity       | 28617438 | 10.1038/cddis.2017.248      |
| negative Regulation: CCN2 ---  chemosensitivity       | 28617438 | 10.1038/cddis.2017.248      |
| negative Regulation: CCN2 ---  chemosensitivity       | 28617438 | 10.1038/cddis.2017.24810.10 |
| negative Regulation: CCN2 ---  chemosensitivity       |          | 10.1016/j.trecan.2020.12.00 |
| negative Regulation: NOTCH2 ---  chemosensitivity     | 30497876 | 10.1016/j.prp.2018.10.013   |
| negative Regulation: CDKN2B-AS1 ---  chemosensitivity | 30777616 | 10.1016/j.prp.2019.01.042   |
| negative Regulation: CDKN2B-AS1 ---  chemosensitivity | 30777616 | 10.1016/j.prp.2019.01.042   |
| negative Regulation: CDKN2B-AS1 ---  chemosensitivity | 31189742 | 10.1042/BSR20182101         |
| negative Regulation: CDKN2B-AS1 ---  chemosensitivity | 30777616 | 10.1016/j.prp.2019.01.04210 |
| negative Regulation: SNHG1 ---  chemosensitivity      | 32505000 | 10.1016/j.omtn.2020.05.011  |
| negative Regulation: AKR1C1 ---  chemosensitivity     | 32307891 | 10.1111/jcmm.1529110.1111/j |
| negative Regulation: AKR1C1 ---  chemosensitivity     | 34702254 | 10.1186/s12935-021-02267-2  |
| negative Regulation: CLIC1 ---  chemosensitivity      |          |                             |



|          |             |        |     |                  |          |                             |
|----------|-------------|--------|-----|------------------|----------|-----------------------------|
| negative | Regulation: | NFE2L2 | --- | chemosensitivity | 22684020 | 10.1016/j.freeradbiomed.201 |
| negative | Regulation: | NFE2L2 | --- | chemosensitivity | 29061583 | 10.1124/dmd.117.078741      |
| negative | Regulation: | NFE2L2 | --- | chemosensitivity | 29061583 | 10.1124/dmd.117.078741      |
| negative | Regulation: | NFE2L2 | --- | chemosensitivity | 30852137 | 10.1016/j.ymthe.2019.02.010 |
| negative | Regulation: | NFE2L2 | --- | chemosensitivity | 30852137 | 10.1016/j.ymthe.2019.02.010 |
| negative | Regulation: | NFE2L2 | --- | chemosensitivity | 30852137 | 10.1016/j.ymthe.2019.02.010 |
| negative | Regulation: | NFE2L2 | --- | chemosensitivity | 32943607 | 10.1038/s41419-020-02938-4  |
| negative | Regulation: | NFE2L2 | --- | chemosensitivity | 33219317 | 10.1038/s41388-020-01551-1  |
| negative | Regulation: | NFE2L2 | --- | chemosensitivity | 33219317 | 10.1038/s41388-020-01551-1  |
| negative | Regulation: | NFE2L2 | --- | chemosensitivity | 33596893 | 10.1186/s12935-021-01822-1  |
| negative | Regulation: | NFE2L2 | --- | chemosensitivity | 33619640 | 10.1007/s11095-021-02997-y  |
| negative | Regulation: | NFE2L2 | --- | chemosensitivity | 23766517 | 10.1210/jc.2013-1510        |
| negative | Regulation: | NFE2L2 | --- | chemosensitivity | 22039513 | 10.1371/journal.pone.002659 |
| negative | Regulation: | NFE2L2 | --- | chemosensitivity | 28560379 | 10.3892/mmr.2017.662110.389 |
| negative | Regulation: | NFE2L2 | --- | chemosensitivity | 30505938 | 10.1016/j.omto.2018.10.0021 |
| negative | Regulation: | NFE2L2 | --- | chemosensitivity | 31590928 | 10.1016/j.ebiom.2019.08.037 |
| negative | Regulation: | NFE2L2 | --- | chemosensitivity | 31648982 | 10.1016/j.ebiom.2019.09.046 |
| negative | Regulation: | NFE2L2 | --- | chemosensitivity | 33461143 | 10.1016/j.phymed.2020.15341 |
| negative | Regulation: | NFE2L2 | --- | chemosensitivity | 34520771 | 10.1016/j.lfs.2021.119948   |
| negative | Regulation: | NFE2L2 | --- | chemosensitivity | 35111249 | 10.3892/o1.2022.1320010.389 |
| negative | Regulation: | NFE2L2 | --- | chemosensitivity | 35272669 | 10.1186/s13046-022-02270-z1 |
| negative | Regulation: | NFE2L2 | --- | chemosensitivity | 35272669 | 10.1186/s13046-022-02270-z1 |
| negative | Regulation: | NFE2L2 | --- | chemosensitivity | 35945195 | 10.1038/s41419-022-05126-8  |
| negative | Regulation: | NFE2L2 | --- | chemosensitivity | 35945195 | 10.1038/s41419-022-05126-8  |
| negative | Regulation: | NFE2L2 | --- | chemosensitivity | 36528059 | 10.1016/j.jbc.2022.102798   |
| negative | Regulation: | GSTA1  | --- | chemosensitivity | 21150160 | 10.1159/000320744           |
| negative | Regulation: | GREM1  | --- | chemosensitivity | 32096207 | 10.26355/eurrev_202002_2015 |
| negative | Regulation: | GREM1  | --- | chemosensitivity | 32096207 | 10.26355/eurrev_202002_2015 |
| negative | Regulation: | KDM6B  | --- | chemosensitivity | 33742970 | 10.1515/hsz-2020-0345       |
| negative | Regulation: | KDM6B  | --- | chemosensitivity | 33742970 | 10.1515/hsz-2020-0345       |
| negative | Regulation: | KDM6B  | --- | chemosensitivity | 33742970 | 10.1515/hsz-2020-0345       |
| negative | Regulation: | KDM6B  | --- | chemosensitivity | 33742970 | 10.1515/hsz-2020-0345       |
| negative | Regulation: | KDM6B  | --- | chemosensitivity | 33742970 | 10.1515/hsz-2020-034510.151 |
| negative | Regulation: | CRNDE  | --- | chemosensitivity | 32426817 | 10.1042/BSR20193450         |
| negative | Regulation: | CRNDE  | --- | chemosensitivity | 31753063 | 10.3727/096504019X157424720 |
| negative | Regulation: | CRNDE  | --- | chemosensitivity | 32426817 | 10.1042/BSR20193450         |
| negative | Regulation: | CRNDE  | --- | chemosensitivity | 32826865 | 10.1038/s41419-020-02853-8  |
| negative | Regulation: | CRNDE  | --- | chemosensitivity | 31753063 | 10.3727/096504019X157424720 |
| negative | Regulation: | CRNDE  | --- | chemosensitivity | 34454479 | 10.1186/s12935-021-02153-x  |
| negative | Regulation: | CRNDE  | --- | chemosensitivity | 34454479 | 10.1186/s12935-021-02153-x  |
| negative | Regulation: | CRNDE  | --- | chemosensitivity | 34454479 | 10.1186/s12935-021-02153-x  |
| negative | Regulation: | CRNDE  | --- | chemosensitivity | 34454479 | 10.1186/s12935-021-02153-x  |
| negative | Regulation: | CRNDE  | --- | chemosensitivity | 34454479 | 10.1186/s12935-021-02153-x  |
| negative | Regulation: | CRNDE  | --- | chemosensitivity | 34454479 | 10.1186/s12935-021-02153-x1 |
| negative | Regulation: | CRNDE  | --- | chemosensitivity | 34454479 | 10.1186/s12935-021-02153-x1 |
| negative | Regulation: | PLD1   | --- | chemosensitivity | 33191863 | 10.1080/16078454.2020.18455 |
| negative | Regulation: | ATG7   | --- | chemosensitivity | 27268264 | 10.1182/blood-2016-01-69224 |
| negative | Regulation: | ATG7   | --- | chemosensitivity | 29130102 | 10.3892/or.2017.6056        |
| negative | Regulation: | ATG7   | --- | chemosensitivity | 27268264 | 10.1182/blood-2016-01-69224 |
| negative | Regulation: | ATG7   | --- | chemosensitivity | 29130102 | 10.3892/or.2017.605610.3892 |
| negative | Regulation: | PLK1   | --- | chemosensitivity | 30611728 | 10.1016/j.bbcan.2018.12.007 |
| negative | Regulation: | PLK1   | --- | chemosensitivity | 28487115 | 10.1016/j.ymthe.2017.04.016 |
| negative | Regulation: | PLK1   | --- | chemosensitivity | 29753186 | 10.1016/j.tranon.2018.04.01 |



|          |             |        |     |                  |          |                             |
|----------|-------------|--------|-----|------------------|----------|-----------------------------|
| negative | Regulation: | PLK1   | --- | chemosensitivity | 30876762 | 10.1016/j.ebiom.2019.02.012 |
| negative | Regulation: | PLK1   | --- | chemosensitivity | 22064247 | 10.1016/j.biocel.2011.10.01 |
| negative | Regulation: | PLK1   | --- | chemosensitivity | 19775446 |                             |
| negative | Regulation: | PLK1   | --- | chemosensitivity | 27090640 | 10.1128/MCB.00130-16        |
| negative | Regulation: | PLK1   | --- | chemosensitivity | 30836927 | 10.2174/1871520619666190301 |
| negative | Regulation: | PLK1   | --- | chemosensitivity | 30836927 | 10.2174/1871520619666190301 |
| negative | Regulation: | PLK1   | --- | chemosensitivity | 31244432 | 10.2174/1871520619666190618 |
| negative | Regulation: | PLK1   | --- | chemosensitivity | 27220401 | 10.3892/or.2016.4820        |
| negative | Regulation: | PLK1   | --- | chemosensitivity | 18266952 | 10.1111/j.1582-4934.2008.00 |
| negative | Regulation: | PLK1   | --- | chemosensitivity | 21402713 | 10.1158/0008-5472.CAN-10-20 |
| negative | Regulation: | PLK1   | --- | chemosensitivity | 30488440 | 10.1002/jcp.2677710.1002/jc |
| negative | Regulation: | PLK1   | --- | chemosensitivity | 30876762 | 10.1016/j.ebiom.2019.02.012 |
| negative | Regulation: | PLK1   | --- | chemosensitivity | 31097408 | 10.1016/j.ebiom.2019.05.001 |
| negative | Regulation: | PLK1   | --- | chemosensitivity | 33418498 | 10.1016/j.ebiom.2020.103041 |
| negative | Regulation: | PLK1   | --- | chemosensitivity | 35659304 | 10.1186/s12957-022-02617-y  |
| negative | Regulation: | PLK1   | --- | chemosensitivity | 36476988 | 10.1038/s41419-022-05478-1  |
| negative | Regulation: | TFAP4  | --- | chemosensitivity | 22615908 | 10.1371/journal.pone.003709 |
| negative | Regulation: | TFAP4  | --- | chemosensitivity | 22615908 | 10.1371/journal.pone.003709 |
| negative | Regulation: | TFAP4  | --- | chemosensitivity | 22615908 | 10.1371/journal.pone.003709 |
| negative | Regulation: | KIF2A  | --- | chemosensitivity | 31858647 | 10.1002/jcla.2313510.1002/j |
| negative | Regulation: | KIF2A  | --- | chemosensitivity | 34792179 | 10.3892/or.2021.8229        |
| negative | Regulation: | KIF2A  | --- | chemosensitivity | 34792179 | 10.3892/or.2021.8229        |
| negative | Regulation: | KIF2A  | --- | chemosensitivity | 34792179 | 10.3892/or.2021.8229        |
| negative | Regulation: | KIF2A  | --- | chemosensitivity | 34792179 | 10.3892/or.2021.8229        |
| negative | Regulation: | KIF2A  | --- | chemosensitivity | 35173830 |                             |
| negative | Regulation: | KIF2A  | --- | chemosensitivity | 35173830 |                             |
| negative | Regulation: | KIF2A  | --- | chemosensitivity | 35173830 |                             |
| negative | Regulation: | KIF2A  | --- | chemosensitivity | 35173830 |                             |
| negative | Regulation: | KIF2A  | --- | chemosensitivity | 35313389 | 10.1002/jcla.2431310.1002/j |
| negative | Regulation: | KIF2A  | --- | chemosensitivity | 35313389 | 10.1002/jcla.2431310.1002/j |
| negative | Regulation: | DAZAP2 | --- | chemosensitivity | 33591310 | 10.1093/nar/gkab08410.1093/ |
| negative | Regulation: | DAZAP2 | --- | chemosensitivity | 33591310 | 10.1093/nar/gkab08410.1093/ |
| negative | Regulation: | PIK3CA | --- | chemosensitivity | 26747178 | 10.1007/s13277-015-4691-5   |
| negative | Regulation: | PIK3CA | --- | chemosensitivity | 26747178 | 10.1007/s13277-015-4691-5   |
| negative | Regulation: | PIK3CA | --- | chemosensitivity | 24071646 | 10.1038/cddis.2013.312      |
| negative | Regulation: | CREB1  | --- | chemosensitivity | 35613826 | 10.1136/jitc-2021-00379310. |
| negative | Regulation: | CYP2A6 | --- | chemosensitivity | 28073588 | 10.1016/j.surg.2016.11.0361 |
| negative | Regulation: | CD55   | --- | chemosensitivity | 20692039 | 10.1016/j.molimm.2010.07.00 |
| negative | Regulation: | BCL2   | --- | chemosensitivity | 12560233 | 10.1182/blood-2002-08-2501  |
| negative | Regulation: | BCL2   | --- | chemosensitivity | 11495901 | 10.1074/jbc.M103632200      |
| negative | Regulation: | BCL2   | --- | chemosensitivity | 11495901 | 10.1074/jbc.M103632200      |
| negative | Regulation: | BCL2   | --- | chemosensitivity | 11495901 | 10.1074/jbc.M103632200      |
| negative | Regulation: | BCL2   | --- | chemosensitivity | 11495901 | 10.1074/jbc.M103632200      |
| negative | Regulation: | BCL2   | --- | chemosensitivity | 15611130 | 10.1074/jbc.M409906200      |
| negative | Regulation: | BCL2   | --- | chemosensitivity | 29879503 | 10.1016/j.gene.2018.06.005  |
| negative | Regulation: | BCL2   | --- | chemosensitivity | 12056703 | 10.1093/annonc/mdf124       |
| negative | Regulation: | BCL2   | --- | chemosensitivity | 27371891 | 10.1016/j.colsurfb.2016.06. |
| negative | Regulation: | BCL2   | --- | chemosensitivity | 28774835 | 10.1016/j.semcancer.2017.07 |
| negative | Regulation: | BCL2   | --- | chemosensitivity | 21878904 | 10.1038/mt.2011.174         |
| negative | Regulation: | BCL2   | --- | chemosensitivity | 21878904 | 10.1038/mt.2011.174         |
| negative | Regulation: | BCL2   | --- | chemosensitivity | 30317163 | 10.1016/j.omtn.2018.08.019  |
| negative | Regulation: | BCL2   | --- | chemosensitivity | 10612539 | 10.1016/S0002-9610(99)00209 |
| negative | Regulation: | BCL2   | --- | chemosensitivity | 11226371 | 10.1016/S0006-2952(00)00538 |

|                                                 |          |                             |
|-------------------------------------------------|----------|-----------------------------|
| negative Regulation: BCL2 ---  chemosensitivity | 12175703 | 10.1016/S0024-3205(02)01900 |
| negative Regulation: BCL2 ---  chemosensitivity | 16458116 | 10.1016/j.canlet.2005.02.01 |
| negative Regulation: BCL2 ---  chemosensitivity | 21840388 | 10.1016/j.jep.2011.07.056   |
| negative Regulation: BCL2 ---  chemosensitivity |          | 10.1016/S0889-8588(05)70229 |
| negative Regulation: BCL2 ---  chemosensitivity |          | 10.1016/S0889-8588(05)70231 |
| negative Regulation: BCL2 ---  chemosensitivity |          | 10.1016/S0889-8588(05)70231 |
| negative Regulation: BCL2 ---  chemosensitivity | 20106644 | 10.1016/j.phymed.2009.12.00 |
| negative Regulation: BCL2 ---  chemosensitivity | 18840529 | 10.1016/j.phrs.2008.09.005  |
| negative Regulation: BCL2 ---  chemosensitivity | 18342810 | 10.1016/j.beha.2007.11.009  |
| negative Regulation: BCL2 ---  chemosensitivity |          | 10.1016/j.bionut.2010.12.00 |
| negative Regulation: BCL2 ---  chemosensitivity | 23083798 | 10.1016/j.clgc.2012.09.002  |
| negative Regulation: BCL2 ---  chemosensitivity | 25596645 | 10.1016/j.urolonc.2014.12.0 |
| negative Regulation: BCL2 ---  chemosensitivity | 19445670 |                             |
| negative Regulation: BCL2 ---  chemosensitivity | 15611130 |                             |
| negative Regulation: BCL2 ---  chemosensitivity | 11495901 |                             |
| negative Regulation: BCL2 ---  chemosensitivity | 11495901 |                             |
| negative Regulation: BCL2 ---  chemosensitivity | 11495901 |                             |
| negative Regulation: BCL2 ---  chemosensitivity | 11495901 |                             |
| negative Regulation: BCL2 ---  chemosensitivity | 11040047 |                             |
| negative Regulation: BCL2 ---  chemosensitivity | 11040047 |                             |
| negative Regulation: BCL2 ---  chemosensitivity | 9396780  |                             |
| negative Regulation: BCL2 ---  chemosensitivity | 17353918 |                             |
| negative Regulation: BCL2 ---  chemosensitivity | 28440463 | 10.3892/or.2017.5584        |
| negative Regulation: BCL2 ---  chemosensitivity | 17088977 |                             |
| negative Regulation: BCL2 ---  chemosensitivity | 21756541 | 10.1179/102453311X130255689 |
| negative Regulation: BCL2 ---  chemosensitivity | 21785821 | 10.3892/i.jo.2011.1140      |
| negative Regulation: BCL2 ---  chemosensitivity | 21936689 | 10.1089/cbr.2011.1031       |
| negative Regulation: BCL2 ---  chemosensitivity | 23774697 | 10.1097/MPA.0b013e3182854ab |
| negative Regulation: BCL2 ---  chemosensitivity | 21878904 | 10.1038/mt.2011.174         |
| negative Regulation: BCL2 ---  chemosensitivity | 23941244 | 10.1089/dna.2013.2138       |
| negative Regulation: BCL2 ---  chemosensitivity | 23848200 | 10.2174/1871520611313999009 |
| negative Regulation: BCL2 ---  chemosensitivity | 24619837 | 10.1055/s-0034-1368198      |
| negative Regulation: BCL2 ---  chemosensitivity | 25405848 | 10.3892/mmr.2014.2951       |
| negative Regulation: BCL2 ---  chemosensitivity | 26300071 | 10.3892/mmr.2015.4230       |
| negative Regulation: BCL2 ---  chemosensitivity | 7845007  |                             |
| negative Regulation: BCL2 ---  chemosensitivity | 9461199  | 10.1038/nm0298-232          |
| negative Regulation: BCL2 ---  chemosensitivity | 10430080 |                             |
| negative Regulation: BCL2 ---  chemosensitivity | 11040047 | 10.1124/mol.58.5.1001       |
| negative Regulation: BCL2 ---  chemosensitivity | 11436358 |                             |
| negative Regulation: BCL2 ---  chemosensitivity | 12393493 | 10.1182/blood-2002-06-1899  |
| negative Regulation: BCL2 ---  chemosensitivity | 12536201 | 10.1038/sj.cgt.7700544      |
| negative Regulation: BCL2 ---  chemosensitivity | 15085157 | 10.1038/sj.leu.2403363      |
| negative Regulation: BCL2 ---  chemosensitivity | 15514848 | 10.1093/abbs/36.11.749      |
| negative Regulation: BCL2 ---  chemosensitivity | 15824414 | 10.1200/JCO.2005.09.118     |
| negative Regulation: BCL2 ---  chemosensitivity | 15826766 | 10.1016/j.eururo.2004.11.01 |
| negative Regulation: BCL2 ---  chemosensitivity | 15837754 | 10.1158/1078-0432.CCR-04-15 |
| negative Regulation: BCL2 ---  chemosensitivity | 16080514 |                             |
| negative Regulation: BCL2 ---  chemosensitivity | 16412276 | 10.1111/j.1745-7254.2006.00 |
| negative Regulation: BCL2 ---  chemosensitivity | 19520430 | 10.1016/j.leukres.2009.05.0 |
| negative Regulation: BCL2 ---  chemosensitivity | 26599548 | 10.1002/mc.2243710.1002/mc. |
| negative Regulation: BCL2 ---  chemosensitivity | 32582369 | 10.3332/ecancer.2020.105410 |
| negative Regulation: BCL2 ---  chemosensitivity | 34354046 | 10.1038/s41419-021-04042-7  |
| negative Regulation: BCL2 ---  chemosensitivity | 34406846 | 10.1089/gtmb.2021.0009      |
| negative Regulation: BCL2 ---  chemosensitivity | 34774019 | 10.1186/s12885-021-08961-8  |

|          |             |           |     |                  |          |                             |
|----------|-------------|-----------|-----|------------------|----------|-----------------------------|
| negative | Regulation: | BCL2      | --- | chemosensitivity | 36445321 | 10.18632/aging.204404       |
| negative | Regulation: | HDAC6     | --- | chemosensitivity | 23618908 | 10.1038/cddis.2013.127      |
| negative | Regulation: | HDAC6     | --- | chemosensitivity | 34524571 | 10.1007/s10565-021-09651-81 |
| negative | Regulation: | B4GALT5   | --- | chemosensitivity | 23744354 | 10.1038/cddis.2013.186      |
| negative | Regulation: | FGFR1     | --- | chemosensitivity | 24651014 | 10.1016/j.ccr.2014.02.005   |
| negative | Regulation: | MIR587    | --- | chemosensitivity | 26247730 | 10.1038/cddis.2015.200      |
| negative | Regulation: | LINC00518 | --- | chemosensitivity | 31993309 | 10.1016/j.apsb.2019.09.011  |
| negative | Regulation: | LINC00518 | --- | chemosensitivity | 30001527 | 10.1159/00049165910.1159/00 |
| negative | Regulation: | FAM83H    | --- | chemosensitivity | 33571515 | 10.1016/j.lfs.2021.119205   |
| negative | Regulation: | CES2      | --- | chemosensitivity | 31981591 | 10.1016/j.yexcr.2020.111856 |
| negative | Regulation: | LRP1      | --- | chemosensitivity | 30458112 | 10.1096/fj.201801339RRR10.1 |
| negative | Regulation: | LRP1      | --- | chemosensitivity | 35628341 | 10.3390/ijms23105532        |
| negative | Regulation: | HULC      | --- | chemosensitivity | 32711110 | 10.1016/j.cellsig.2020.1097 |
| negative | Regulation: | HULC      | --- | chemosensitivity | 29168767 | 10.3390/ijms18122505        |
| negative | Regulation: | HULC      | --- | chemosensitivity | 30224380 | 10.1042/BSR20180915         |
| negative | Regulation: | HULC      | --- | chemosensitivity | 30472720 | 10.12659/MSM.911179         |
| negative | Regulation: | HULC      | --- | chemosensitivity | 31614437 | 10.3390/ijms20205029        |
| negative | Regulation: | HULC      | --- | chemosensitivity | 32627034 | 10.3892/or.2020.7608        |
| negative | Regulation: | HULC      | --- | chemosensitivity | 32744688 | 10.26355/eurrev_202007_2226 |
| negative | Regulation: | HULC      | --- | chemosensitivity | 33067424 | 10.1038/s41419-020-03080-x  |
| negative | Regulation: | HULC      | --- | chemosensitivity | 34223709 | 10.1002/prp2.81510.1002/prp |
| negative | Regulation: | DROSHA    | --- | chemosensitivity | 27609577 |                             |
| negative | Regulation: | B3GNT8    | --- | chemosensitivity | 22579717 | 10.1016/j.biocel.2012.04.02 |
| negative | Regulation: | SUV39H2   | --- | chemosensitivity | 31636512 | 10.1186/s12935-019-0982-z   |
| negative | Regulation: | SUV39H2   | --- | chemosensitivity | 31636512 | 10.1186/s12935-019-0982-z   |
| negative | Regulation: | SUV39H2   | --- | chemosensitivity | 31636512 | 10.1186/s12935-019-0982-z   |
| negative | Regulation: | SUV39H2   | --- | chemosensitivity | 31636512 | 10.1186/s12935-019-0982-z   |
| negative | Regulation: | SUV39H2   | --- | chemosensitivity | 31636512 | 10.1186/s12935-019-0982-z   |
| negative | Regulation: | SUV39H2   | --- | chemosensitivity | 31636512 | 10.1186/s12935-019-0982-z10 |
| negative | Regulation: | ABCC6     | --- | chemosensitivity | 28582730 | 10.1016/j.redox.2017.05.025 |
| negative | Regulation: | CCNE2     | --- | chemosensitivity | 28176879 | 10.1038/srep4231910.1038/sr |
| negative | Regulation: | HOTTIP    | --- | chemosensitivity | 28254409 | 10.1016/j.canlet.2017.02.02 |
| negative | Regulation: | HOTTIP    | --- | chemosensitivity | 31465841 | 10.1016/j.canlet.2019.08.01 |
| negative | Regulation: | HOTTIP    | --- | chemosensitivity | 32335298 | 10.1016/j.biopha.2020.11015 |
| negative | Regulation: | HOTTIP    | --- | chemosensitivity | 33207266 | 10.1016/j.semcancer.2020.11 |
| negative | Regulation: | HOTTIP    | --- | chemosensitivity | 27546609 | 10.1039/c6mb00475j          |
| negative | Regulation: | HOTTIP    | --- | chemosensitivity | 28586074 | 10.3892/or.2017.5691        |
| negative | Regulation: | HOTTIP    | --- | chemosensitivity | 25779149 | 10.1186/s12967-015-0442-z   |
| negative | Regulation: | HOTTIP    | --- | chemosensitivity | 25779149 | 10.1186/s12967-015-0442-z   |
| negative | Regulation: | HOTTIP    | --- | chemosensitivity | 25779149 | 10.1186/s12967-015-0442-z   |
| negative | Regulation: | HOTTIP    | --- | chemosensitivity | 30652087 | 10.21037/hbsn.2018.10.0710. |
| negative | Regulation: | HOTTIP    | --- | chemosensitivity | 30809864 | 10.1002/jcb.2785110.1002/jc |
| negative | Regulation: | HOTTIP    | --- | chemosensitivity |          | 10.1016/j.semcancer.2022.03 |
| negative | Regulation: | HOTTIP    | --- | chemosensitivity | 34365949 | 10.2174/1566524021666210806 |
| negative | Regulation: | HOTTIP    | --- | chemosensitivity | 34365949 | 10.2174/1566524021666210806 |
| negative | Regulation: | HOTTIP    | --- | chemosensitivity | 36514224 | 10.3724/abbs.2022182        |
| negative | Regulation: | BTK       | --- | chemosensitivity | 10092645 |                             |
| negative | Regulation: | ALDOA     | --- | chemosensitivity | 28000858 | 10.3892/ijo.2016.3814       |
| negative | Regulation: | ALDOA     | --- | chemosensitivity | 28000858 | 10.3892/ijo.2016.3814       |
| negative | Regulation: | NFKBIA    | --- | chemosensitivity | 15327837 | 10.1016/j.canlet.2004.03.04 |
| negative | Regulation: | NFKBIA    | --- | chemosensitivity | 12824895 | 10.1111/j.1349-7006.2003.tb |
| negative | Regulation: | NFKBIA    | --- | chemosensitivity | 12824895 | 10.1111/j.1349-7006.2003.tb |
| negative | Regulation: | NFKBIA    | --- | chemosensitivity | 12871783 | 10.1016/s0169-5002(03)00227 |
| negative | Regulation: | FGD5      | --- | chemosensitivity | 33416094 | 10.3892/ijmm.2020.4816      |

|          |                     |      |                  |          |                             |
|----------|---------------------|------|------------------|----------|-----------------------------|
| negative | Regulation: CCDC88A | ---- | chemosensitivity | 29989653 | 10.3892/or.2018.6511        |
| negative | Regulation: CCDC88A | ---- | chemosensitivity | 25009397 | 10.3748/wjg.v20.i25.822910. |
| negative | Regulation: CCDC88A | ---- | chemosensitivity | 33854963 | 10.3389/fonc.2021.61876410. |
| negative | Regulation: CCDC88A | ---- | chemosensitivity | 33854963 | 10.3389/fonc.2021.61876410. |
| negative | Regulation: MIR3658 | ---- | chemosensitivity | 29739079 | 10.7754/Clin.Lab.2017.17102 |
| negative | Regulation: MIR3658 | ---- | chemosensitivity | 30988071 | 10.1042/BSR20181743         |
| negative | Regulation: MIR3658 | ---- | chemosensitivity | 29739079 | 10.7754/Clin.Lab.2017.17102 |
| negative | Regulation: C4orf47 | ---- | chemosensitivity |          | 10.1093/annonc/mdx660.043   |
| negative | Regulation: PTGS1   | ---- | chemosensitivity | 32653589 | 10.1016/j.bcp.2020.114147   |
| negative | Regulation: PTGS1   | ---- | chemosensitivity | 33075476 | 10.1016/j.prostaglandins.20 |
| negative | Regulation: EIF4G2  | ---- | chemosensitivity | 33526055 | 10.1186/s13046-021-01853-6  |
| negative | Regulation: EIF4G2  | ---- | chemosensitivity | 28117895 | 10.1002/1873-3468.1256610.1 |
| negative | Regulation: BIRC5   | ---- | chemosensitivity | 29678577 | 10.1016/j.bbrc.2018.04.129  |
| negative | Regulation: BIRC5   | ---- | chemosensitivity | 28624478 | 10.1016/j.addr.2017.06.004  |
| negative | Regulation: BIRC5   | ---- | chemosensitivity | 28505590 | 10.1016/j.jpba.2017.04.025  |
| negative | Regulation: BIRC5   | ---- | chemosensitivity | 28577912 | 10.1016/j.drudis.2017.05.00 |
| negative | Regulation: BIRC5   | ---- | chemosensitivity | 22169827 | 10.1016/j.biomaterials.2011 |
| negative | Regulation: BIRC5   | ---- | chemosensitivity | 22169827 | 10.1016/j.biomaterials.2011 |
| negative | Regulation: BIRC5   | ---- | chemosensitivity | 19318043 | 10.1016/j.pharmthera.2009.C |
| negative | Regulation: BIRC5   | ---- | chemosensitivity | 21130850 | 10.1016/j.ijpharm.2010.11.C |
| negative | Regulation: BIRC5   | ---- | chemosensitivity | 27459907 | 10.3892/or.2016.4958        |
| negative | Regulation: BIRC5   | ---- | chemosensitivity | 27489375 | 10.1136/postgradmedj-2016-1 |
| negative | Regulation: BIRC5   | ---- | chemosensitivity | 29328459 | 10.3892/or.2018.6187        |
| negative | Regulation: BIRC5   | ---- | chemosensitivity | 27063218 | 10.1038/aps.2015.152        |
| negative | Regulation: BIRC5   | ---- | chemosensitivity | 31711057 | 10.1159/000502913           |
| negative | Regulation: BIRC5   | ---- | chemosensitivity | 32945459 | 10.3892/or.2020.7698        |
| negative | Regulation: BIRC5   | ---- | chemosensitivity | 22426961 | 10.1007/s00432-012-1196-0   |
| negative | Regulation: BIRC5   | ---- | chemosensitivity | 23254641 | 10.3892/or.2012.2196        |
| negative | Regulation: BIRC5   | ---- | chemosensitivity | 23254641 | 10.3892/or.2012.2196        |
| negative | Regulation: BIRC5   | ---- | chemosensitivity | 22117970 |                             |
| negative | Regulation: BIRC5   | ---- | chemosensitivity | 20490863 | 10.1007/s00432-010-0914-8   |
| negative | Regulation: BIRC5   | ---- | chemosensitivity | 20563741 | 10.1007/s11010-010-0525-3   |
| negative | Regulation: BIRC5   | ---- | chemosensitivity | 22211100 |                             |
| negative | Regulation: BIRC5   | ---- | chemosensitivity | 23091600 | 10.1371/journal.pone.004673 |
| negative | Regulation: BIRC5   | ---- | chemosensitivity | 21034604 | 10.3760/cma.j.issn.0366-699 |
| negative | Regulation: BIRC5   | ---- | chemosensitivity | 21034604 | 10.3760/cma.j.issn.0366-699 |
| negative | Regulation: BIRC5   | ---- | chemosensitivity | 24330851 | 10.3727/096504013X137935557 |
| negative | Regulation: BIRC5   | ---- | chemosensitivity | 23990130 | 10.1007/s12013-013-9722-5   |
| negative | Regulation: BIRC5   | ---- | chemosensitivity | 23509217 | 10.1515/hsz-2013-0128       |
| negative | Regulation: BIRC5   | ---- | chemosensitivity | 26081496 | 10.3892/or.2015.4067        |
| negative | Regulation: BIRC5   | ---- | chemosensitivity | 26125270 |                             |
| negative | Regulation: BIRC5   | ---- | chemosensitivity | 26392111 | 10.1007/s13277-015-4075-x   |
| negative | Regulation: BIRC5   | ---- | chemosensitivity | 27050416 | 10.1371/journal.pone.015301 |
| negative | Regulation: BIRC5   | ---- | chemosensitivity | 17686279 |                             |
| negative | Regulation: BIRC5   | ---- | chemosensitivity | 17686279 |                             |
| negative | Regulation: BIRC5   | ---- | chemosensitivity | 17686279 |                             |
| negative | Regulation: BIRC5   | ---- | chemosensitivity | 18594980 | 10.1007/s10620-008-0329-410 |
| negative | Regulation: BIRC5   | ---- | chemosensitivity | 19280061 | 10.1093/abbs/gmp005         |
| negative | Regulation: BIRC5   | ---- | chemosensitivity | 19921309 | 10.1007/s11845-009-0448-810 |
| negative | Regulation: BIRC5   | ---- | chemosensitivity | 19951584 |                             |
| negative | Regulation: BIRC5   | ---- | chemosensitivity | 20441052 | 10.3727/096504010x126444223 |
| negative | Regulation: BIRC5   | ---- | chemosensitivity | 20441052 | 10.3727/096504010x126444223 |
| negative | Regulation: BIRC5   | ---- | chemosensitivity | 22068035 | 10.1158/0008-5472.CAN-11-23 |
| negative | Regulation: BIRC5   | ---- | chemosensitivity | 22593446 |                             |

|                                                      |          |                             |
|------------------------------------------------------|----------|-----------------------------|
| negative Regulation: BIRC5 ---  chemosensitivity     | 23254641 | 10.3892/or.2012.219610.3892 |
| negative Regulation: BIRC5 ---  chemosensitivity     | 23358177 | 10.1097/IGC.0b013e31827ad2b |
| negative Regulation: BIRC5 ---  chemosensitivity     | 23591345 |                             |
| negative Regulation: BIRC5 ---  chemosensitivity     | 24212789 | 10.3390/cancers302192910.33 |
| negative Regulation: BIRC5 ---  chemosensitivity     | 24460358 | 10.7314/apjcp.2013.14.12.77 |
| negative Regulation: BIRC5 ---  chemosensitivity     | 25070628 | 10.3892/mmr.2014.241310.389 |
| negative Regulation: BIRC5 ---  chemosensitivity     | 25070628 | 10.3892/mmr.2014.241310.389 |
| negative Regulation: BIRC5 ---  chemosensitivity     | 26123662 | 10.1016/j.canlet.2015.05.03 |
| negative Regulation: BIRC5 ---  chemosensitivity     | 29678577 | 10.1016/j.bbrc.2018.04.1291 |
| negative Regulation: BIRC5 ---  chemosensitivity     | 25707849 | 10.3892/mmr.2015.3380       |
| negative Regulation: BIRC5 ---  chemosensitivity     |          | 10.1016/j.biomaterials.2011 |
| negative Regulation: BIRC5 ---  chemosensitivity     |          | 10.1016/j.biomaterials.2011 |
| negative Regulation: BIRC5 ---  chemosensitivity     |          | 10.1159/000502913           |
| negative Regulation: BIRC5 ---  chemosensitivity     | 16224667 |                             |
| negative Regulation: BIRC5 ---  chemosensitivity     | 35706019 | 10.1186/s12929-022-00824-z  |
| negative Regulation: IL17RA ---  chemosensitivity    | 33243748 | 10.12122/j.issn.1673-4254.2 |
| negative Regulation: CS ---  chemosensitivity        | 25545012 | 10.1371/journal.pone.011570 |
| negative Regulation: CS ---  chemosensitivity        | 25545012 | 10.1371/journal.pone.011570 |
| negative Regulation: FOXO4 ---  chemosensitivity     | 33152911 | 10.1016/j.biopha.2020.11072 |
| negative Regulation: HGF ---  chemosensitivity       | 22820099 | 10.1016/j.abb.2012.07.003   |
| negative Regulation: HGF ---  chemosensitivity       | 22741575 | 10.1186/1477-7819-10-128    |
| negative Regulation: HGF ---  chemosensitivity       | 10924353 | 10.1006/bbrc.2000.3199      |
| negative Regulation: HGF ---  chemosensitivity       | 22741575 | 10.1186/1477-7819-10-128    |
| negative Regulation: HGF ---  chemosensitivity       | 22741575 | 10.1186/1477-7819-10-128    |
| negative Regulation: BCAT1 ---  chemosensitivity     | 33760210 | 10.3892/OR.2021.8003        |
| negative Regulation: BCAT1 ---  chemosensitivity     | 28052414 | 10.1002/mc.2261210.1002/mc. |
| negative Regulation: BCAT1 ---  chemosensitivity     | 33798550 | 10.1016/j.lfs.2021.11940510 |
| negative Regulation: MIR663A ---  chemosensitivity   | 23436656 | 10.1074/jbc.M112.434340     |
| negative Regulation: MIR663A ---  chemosensitivity   | 23436656 | 10.1074/jbc.M112.434340     |
| negative Regulation: MIR663A ---  chemosensitivity   | 23436656 | 10.1074/jbc.M112.434340     |
| negative Regulation: MIR663A ---  chemosensitivity   | 33116621 | 10.2147/OTT.S26157010.2147/ |
| negative Regulation: BIRC3 ---  chemosensitivity     | 27002147 | 10.1074/jbc.M115.700021     |
| negative Regulation: BIRC3 ---  chemosensitivity     | 32298617 | 10.1016/j.tim.2020.01.001   |
| negative Regulation: BIRC3 ---  chemosensitivity     | 21952624 | 10.1038/bjc.2011.387        |
| negative Regulation: BIRC3 ---  chemosensitivity     | 21952624 | 10.1038/bjc.2011.387        |
| negative Regulation: BIRC3 ---  chemosensitivity     | 27002147 | 10.1074/jbc.M115.700021     |
| negative Regulation: MIR329-1 ---  chemosensitivity  | 33989708 | 10.1016/j.canlet.2021.05.00 |
| negative Regulation: PCGF2 ---  chemosensitivity     | 31186712 | 10.3892/ol.2019.1016010.389 |
| negative Regulation: ATR ---  chemosensitivity       | 18413665 |                             |
| negative Regulation: ATR ---  chemosensitivity       | 21927021 | 10.1038/onc.2011.399        |
| negative Regulation: ATR ---  chemosensitivity       | 18413665 | 10.1124/mol.107.04474310.11 |
| negative Regulation: ATR ---  chemosensitivity       | 21927021 | 10.1038/onc.2011.39910.1038 |
| negative Regulation: ATR ---  chemosensitivity       | 30666155 | 10.2147/CMAR.S18709910.2147 |
| negative Regulation: ATR ---  chemosensitivity       | 35530299 |                             |
| negative Regulation: RAD50 ---  chemosensitivity     | 26951044 | 10.1186/s12885-016-2190-8   |
| negative Regulation: LINC00337 ---  chemosensitivity | 32239565 | 10.1096/fj.201900731RR10.10 |
| negative Regulation: ELK1 ---  chemosensitivity      | 28987388 | 10.1016/j.canlet.2017.09.04 |
| negative Regulation: NEDD4 ---  chemosensitivity     | 33288736 | 10.18632/aging.202185       |
| negative Regulation: MAPK3 ---  chemosensitivity     | 22179790 | 10.3892/ijo.2011.1303       |
| negative Regulation: MAPK3 ---  chemosensitivity     | 22179790 | 10.3892/ijo.2011.1303       |
| negative Regulation: MAPK3 ---  chemosensitivity     | 22179790 | 10.3892/ijo.2011.1303       |
| negative Regulation: MAPK3 ---  chemosensitivity     | 26316041 | 10.3892/ijo.2015.3137       |
| negative Regulation: MAPK3 ---  chemosensitivity     | 22179790 | 10.3892/ijo.2011.1303       |
| negative Regulation: MAPK3 ---  chemosensitivity     | 22179790 | 10.3892/ijo.2011.1303       |

|                                                   |                                      |
|---------------------------------------------------|--------------------------------------|
| negative Regulation: MAPK3 ---  chemosensitivity  |                                      |
| negative Regulation: VEGFA ---  chemosensitivity  | 28119236 10.1016/j.biopha.2017.01.05 |
| negative Regulation: VEGFA ---  chemosensitivity  | 21397054 10.1016/j.resp.2011.03.006  |
| negative Regulation: VEGFA ---  chemosensitivity  | 33838253 10.1016/j.matbio.2021.04.00 |
| negative Regulation: VEGFA ---  chemosensitivity  | 28742793 10.1038/bjc.2017.238        |
| negative Regulation: VEGFA ---  chemosensitivity  | 28742793 10.1038/bjc.2017.238        |
| negative Regulation: VEGFA ---  chemosensitivity  | 27362808 10.1038/cddis.2016.194      |
| negative Regulation: VEGFA ---  chemosensitivity  | 21057529 10.1038/onc.2010.496        |
| negative Regulation: VEGFA ---  chemosensitivity  | 26199906 10.22074/cellj.2016.3730    |
| negative Regulation: VEGFA ---  chemosensitivity  | 28742793 10.1038/bjc.2017.23810.1038 |
| negative Regulation: DUSP6 ---  chemosensitivity  | 10.1016/j.mgene.2020.100692          |
| negative Regulation: PDK4 ---  chemosensitivity   | 27330076 10.1074/jbc.M116.713735     |
| negative Regulation: PDK4 ---  chemosensitivity   | 33667731 10.1016/j.clinre.2021.10166 |
| negative Regulation: PDK4 ---  chemosensitivity   | 32577500 10.1016/j.omto.2020.05.008  |
| negative Regulation: PDK4 ---  chemosensitivity   | 27330076 10.1074/jbc.M116.713735     |
| negative Regulation: PDK4 ---  chemosensitivity   | 32444598 10.1038/s41467-020-16306-5  |
| negative Regulation: PDK4 ---  chemosensitivity   | 32444598 10.1038/s41467-020-16306-5  |
| negative Regulation: PLXND1 ---  chemosensitivity | 35917012 10.1245/s10434-022-11945-y  |
| negative Regulation: CSF1 ---  chemosensitivity   | 31629410 10.1186/s12929-019-0568-z   |
| negative Regulation: CSF1 ---  chemosensitivity   | 10.1186/s12929-019-0568-z            |
| negative Regulation: RIPK2 ---  chemosensitivity  | 24642040 10.1186/bcr3629             |
| negative Regulation: PTGS2 ---  chemosensitivity  | 31494169 10.1016/j.lfs.2019.116825   |
| negative Regulation: PTGS2 ---  chemosensitivity  | 30954568 10.1016/j.bbamcr.2019.04.00 |
| negative Regulation: PTGS2 ---  chemosensitivity  | 31473273 10.1016/j.virusres.2019.197 |
| negative Regulation: PTGS2 ---  chemosensitivity  | 16580341 10.1016/j.ajog.2005.07.086  |
| negative Regulation: PTGS2 ---  chemosensitivity  | 19836060 10.1016/j.acthis.2009.09.00 |
| negative Regulation: PTGS2 ---  chemosensitivity  | 10.1053/j.seminoncol.2003.1          |
| negative Regulation: PTGS2 ---  chemosensitivity  | 10.1016/j.ijrobp.2007.07.17          |
| negative Regulation: PTGS2 ---  chemosensitivity  | 10.1016/j.ijrobp.2010.07.14          |
| negative Regulation: PTGS2 ---  chemosensitivity  | 24184161 10.1016/j.bbamcr.2013.10.01 |
| negative Regulation: PTGS2 ---  chemosensitivity  | 24184161 10.1016/j.bbamcr.2013.10.01 |
| negative Regulation: PTGS2 ---  chemosensitivity  | 18356920                             |
| negative Regulation: PTGS2 ---  chemosensitivity  | 33138752 10.2174/1381612826666201102 |
| negative Regulation: PTGS2 ---  chemosensitivity  | 23393346                             |
| negative Regulation: PTGS2 ---  chemosensitivity  | 16912190 10.1158/0008-5472.CAN-06-12 |
| negative Regulation: PTGS2 ---  chemosensitivity  | 17982644                             |
| negative Regulation: PTGS2 ---  chemosensitivity  | 18592138 10.1007/s11010-008-9847-910 |
| negative Regulation: PTGS2 ---  chemosensitivity  | 19276291 10.1158/1078-0432.CCR-08-06 |
| negative Regulation: PTGS2 ---  chemosensitivity  | 28881683 10.18632/oncotarget.1851810 |
| negative Regulation: PTGS2 ---  chemosensitivity  | 30365050 10.3892/ijmm.2018.393910.38 |
| negative Regulation: PTGS2 ---  chemosensitivity  | 34084214 10.3892/ol.2021.1279410.389 |
| negative Regulation: PTGS2 ---  chemosensitivity  | 10.1016/j.bbamcr.2019.04.00          |
| negative Regulation: PTGS2 ---  chemosensitivity  |                                      |
| negative Regulation: IKBKB ---  chemosensitivity  | 19940859                             |
| negative Regulation: IKBKB ---  chemosensitivity  | 19940859 10.1038/jid.2009.36510.1038 |
| negative Regulation: SOX9 ---  chemosensitivity   | 33524528 10.1016/j.bbcan.2021.188517 |
| negative Regulation: SOX9 ---  chemosensitivity   | 28984791 10.1097/MPA.000000000000094 |
| negative Regulation: SOX9 ---  chemosensitivity   | 28984791 10.1097/MPA.000000000000094 |
| negative Regulation: SOX9 ---  chemosensitivity   | 29749469 10.3892/ijo.2018.4382       |
| negative Regulation: CHRNA7 ---  chemosensitivity | 31962133 10.1016/j.lfs.2020.117332   |
| negative Regulation: CHRNA7 ---  chemosensitivity | 35972579 10.1007/s12032-022-01745-5  |
| negative Regulation: CHRNA7 ---  chemosensitivity | 35972579 10.1007/s12032-022-01745-5  |
| negative Regulation: CHRNA7 ---  chemosensitivity | 35972579 10.1007/s12032-022-01745-5  |
| negative Regulation: CHRNA7 ---  chemosensitivity | 35972579 10.1007/s12032-022-01745-5  |

|                      |           |     |  |                  |          |                             |
|----------------------|-----------|-----|--|------------------|----------|-----------------------------|
| negative Regulation: | RPS6KA5   | --- |  | chemosensitivity | 28314603 | 10.1016/j.dld.2017.02.009   |
| negative Regulation: | RPS6KA5   | --- |  | chemosensitivity | 28314603 | 10.1016/j.dld.2017.02.0091C |
| negative Regulation: | CYRIB     | --- |  | chemosensitivity | 34645466 | 10.1186/s12935-021-02244-9  |
| negative Regulation: | DKK4      | --- |  | chemosensitivity | 28981599 | 10.1093/abbs/gmx08610.1093/ |
| negative Regulation: | DKK4      | --- |  | chemosensitivity | 34255218 | 10.1007/s10528-021-10080-9  |
| negative Regulation: | S100A8    | --- |  | chemosensitivity | 27956388 | 10.1182/blood-2016-07-6927C |
| negative Regulation: | S100A8    | --- |  | chemosensitivity | 33801279 | 10.3390/molecules26051323   |
| negative Regulation: | S100A8    | --- |  | chemosensitivity | 24820971 | 10.1371/journal.pone.009724 |
| negative Regulation: | EPS8      | --- |  | chemosensitivity | 29192326 | 10.3892/or.2017.6102        |
| negative Regulation: | EPS8      | --- |  | chemosensitivity | 25359883 | 10.1242/jcs.157560          |
| negative Regulation: | EPS8      | --- |  | chemosensitivity | 25803781 | 10.1371/journal.pone.011938 |
| negative Regulation: | EPS8      | --- |  | chemosensitivity | 29192326 | 10.3892/or.2017.6102        |
| negative Regulation: | EPS8      | --- |  | chemosensitivity | 29192326 | 10.3892/or.2017.6102        |
| negative Regulation: | EPS8      | --- |  | chemosensitivity | 29357910 | 10.1186/s13046-018-0682-x   |
| negative Regulation: | EPS8      | --- |  | chemosensitivity | 29357910 | 10.1186/s13046-018-0682-x   |
| negative Regulation: | EPS8      | --- |  | chemosensitivity | 29357910 | 10.1186/s13046-018-0682-x   |
| negative Regulation: | EPS8      | --- |  | chemosensitivity | 33432368 | 10.3892/or.2021.7927        |
| negative Regulation: | TDGF1     | --- |  | chemosensitivity | 29445127 | 10.1038/s41418-018-0059-x   |
| negative Regulation: | SLC25A5   | --- |  | chemosensitivity | 22198296 |                             |
| negative Regulation: | SLC25A5   | --- |  | chemosensitivity | 22198296 |                             |
| negative Regulation: | SLC25A5   | --- |  | chemosensitivity | 22198296 |                             |
| negative Regulation: | SLC25A5   | --- |  | chemosensitivity | 22198296 | 10.3858/emm.2012.44.4.0191C |
| negative Regulation: | NAMPT     | --- |  | chemosensitivity | 30876976 | 10.1016/j.ejphar.2019.03.01 |
| negative Regulation: | NAMPT     | --- |  | chemosensitivity | 33823623 | 10.1177/09603271211006168   |
| negative Regulation: | NAMPT     | --- |  | chemosensitivity | 35506454 | 10.3892/ijo.2022.536510.389 |
| negative Regulation: | NAMPT     | --- |  | chemosensitivity | 35506454 | 10.3892/ijo.2022.536510.389 |
| negative Regulation: | NAMPT     | --- |  | chemosensitivity | 35506454 | 10.3892/ijo.2022.5365       |
| negative Regulation: | LASP1     | --- |  | chemosensitivity | 33915163 | 10.1016/j.brainres.2021.147 |
| negative Regulation: | LASP1     | --- |  | chemosensitivity | 29980193 | 10.1186/s12885-018-4649-2   |
| negative Regulation: | LASP1     | --- |  | chemosensitivity | 29980193 | 10.1186/s12885-018-4649-2   |
| negative Regulation: | LASP1     | --- |  | chemosensitivity | 29980193 | 10.1186/s12885-018-4649-2   |
| negative Regulation: | LASP1     | --- |  | chemosensitivity | 29980193 | 10.1186/s12885-018-4649-21C |
| negative Regulation: | FLT3LG    | --- |  | chemosensitivity | 17942916 | 10.1158/0008-5472.CAN-07-01 |
| negative Regulation: | RFC4      | --- |  | chemosensitivity | 18492021 | 10.1111/j.1478-3231.2008.01 |
| negative Regulation: | PHF20     | --- |  | chemosensitivity | 33982773 | 10.3892/ijo.2021.5218       |
| negative Regulation: | PHF20     | --- |  | chemosensitivity | 33982773 | 10.3892/ijo.2021.5218       |
| negative Regulation: | PHF20     | --- |  | chemosensitivity | 33982773 | 10.3892/ijo.2021.5218       |
| negative Regulation: | PHF20     | --- |  | chemosensitivity | 33982773 | 10.3892/ijo.2021.521810.389 |
| negative Regulation: | PHF20     | --- |  | chemosensitivity | 33982773 | 10.3892/ijo.2021.521810.389 |
| negative Regulation: | P4HA1     | --- |  | chemosensitivity | 31239153 | 10.1016/j.bbrc.2019.06.096  |
| negative Regulation: | MAF1      | --- |  | chemosensitivity | 30628658 | 10.3892/ijo.2019.4678       |
| negative Regulation: | PROX1-AS1 | --- |  | chemosensitivity | 34583623 | 10.1080/15384101.2021.19713 |
| negative Regulation: | LINC00667 | --- |  | chemosensitivity | 36281649 | 10.4081/ejh.2022.3529       |
| negative Regulation: | USP22     | --- |  | chemosensitivity | 32687947 | 10.1016/j.gene.2020.144960  |
| negative Regulation: | USP22     | --- |  | chemosensitivity | 31133011 | 10.1186/s12929-019-0522-0   |
| negative Regulation: | USP22     | --- |  | chemosensitivity | 31776228 | 10.1136/gut.jnl-2019-319616 |
| negative Regulation: | BRCA2     | --- |  | chemosensitivity | 25758301 | 10.1016/j.bulcan.2015.01.01 |
| negative Regulation: | BRCA2     | --- |  | chemosensitivity | 24131965 | 10.1093/annonc/mdt30710.109 |
| negative Regulation: | BRCA2     | --- |  | chemosensitivity | 25758301 | 10.1016/j.bulcan.2015.01.01 |
| negative Regulation: | SNHG8     | --- |  | chemosensitivity |          |                             |
| negative Regulation: | SNHG8     | --- |  | chemosensitivity |          |                             |
| negative Regulation: | SNHG8     | --- |  | chemosensitivity | 30556854 | 10.26355/eurrev_201812_165C |
| negative Regulation: | SNHG8     | --- |  | chemosensitivity | 30556854 | 10.26355/eurrev_201812_165C |
| negative Regulation: | SNHG8     | --- |  | chemosensitivity | 30556854 | 10.26355/eurrev_201812_165C |

|          |             |           |     |                  |          |                             |
|----------|-------------|-----------|-----|------------------|----------|-----------------------------|
| negative | Regulation: | NEDD9     | --- | chemosensitivity | 31411930 | 10.1089/cbr.2018.2761       |
| negative | Regulation: | USP7      | --- | chemosensitivity | 29065837 | 10.2174/1573406413666171020 |
| negative | Regulation: | USP7      | --- | chemosensitivity | 24136231 | 10.1038/cddis.2013.400      |
| negative | Regulation: | USP7      | --- | chemosensitivity |          |                             |
| negative | Regulation: | USP7      | --- | chemosensitivity | 36291159 | 10.3390/cells11203294       |
| negative | Regulation: | CLPTM1L   | --- | chemosensitivity | 23300716 | 10.1371/journal.pone.005259 |
| negative | Regulation: | AQP5      | --- | chemosensitivity | 29390193 | 10.1139/bcb-2017-0162       |
| negative | Regulation: | AQP5      | --- | chemosensitivity | 29390193 | 10.1139/bcb-2017-0162       |
| negative | Regulation: | AQP5      | --- | chemosensitivity | 29390193 | 10.1139/bcb-2017-0162       |
| negative | Regulation: | AQP5      | --- | chemosensitivity | 29390193 | 10.1139/bcb-2017-0162       |
| negative | Regulation: | AQP5      | --- | chemosensitivity | 29390193 | 10.1139/bcb-2017-016210.113 |
| negative | Regulation: | KRT16     | --- | chemosensitivity | 30782177 | 10.1186/s13046-019-1091-5   |
| negative | Regulation: | KRT16     | --- | chemosensitivity | 30782177 | 10.1186/s13046-019-1091-5   |
| negative | Regulation: | KRT16     | --- | chemosensitivity | 30782177 | 10.1186/s13046-019-1091-5   |
| negative | Regulation: | KRT16     | --- | chemosensitivity | 30782177 | 10.1186/s13046-019-1091-510 |
| negative | Regulation: | QKI       | --- | chemosensitivity | 31786621 | 10.1007/s00210-019-01772-6  |
| negative | Regulation: | ENPP1     | --- | chemosensitivity | 24531536 | 10.1038/cdd.2014.12         |
| negative | Regulation: | ENPP1     | --- | chemosensitivity | 24531536 | 10.1038/cdd.2014.12         |
| negative | Regulation: | ATG4B     | --- | chemosensitivity | 31291988 | 10.1186/s13046-019-1287-8   |
| negative | Regulation: | RNF8      | --- | chemosensitivity | 27618486 | 10.1016/j.molcel.2016.08.00 |
| negative | Regulation: | RNF8      | --- | chemosensitivity | 32572597 | 10.1007/s00401-020-02180-4  |
| negative | Regulation: | RNF8      | --- | chemosensitivity | 747      | 10.1016/j.molcel.2016.08.00 |
| negative | Regulation: | CLDN1     | --- | chemosensitivity | 29524521 | 10.1016/j.bbamcr.2018.03.00 |
| negative | Regulation: | CLDN1     | --- | chemosensitivity | 29524521 | 10.1016/j.bbamcr.2018.03.00 |
| negative | Regulation: | CLDN1     | --- | chemosensitivity | 32824620 | 10.3390/ijms21165909        |
| negative | Regulation: | CLDN1     | --- | chemosensitivity | 32824620 | 10.3390/ijms21165909        |
| negative | Regulation: | CLDN1     | --- | chemosensitivity | 33828978 | 10.3389/fonc.2021.62087310. |
| negative | Regulation: | ABCC1     | --- | chemosensitivity | 32278855 | 10.1016/j.ejphar.2020.17310 |
| negative | Regulation: | ABCC1     | --- | chemosensitivity | 21219875 | 10.1016/j.bcp.2010.12.018   |
| negative | Regulation: | ABCC1     | --- | chemosensitivity | 11864633 | 10.1016/S0014-2999(02)01267 |
| negative | Regulation: | ABCC1     | --- | chemosensitivity | 22771706 | 10.1016/j.brainres.2012.06. |
| negative | Regulation: | ABCC1     | --- | chemosensitivity | 30001527 | 10.1159/000491659           |
| negative | Regulation: | ABCC1     | --- | chemosensitivity | 31582906 | 10.1186/s12935-019-0943-6   |
| negative | Regulation: | ABCC1     | --- | chemosensitivity | 34054937 | 10.1155/2021/5525091        |
| negative | Regulation: | ABCC1     | --- | chemosensitivity | 22460269 | 10.1038/bjc.2012.81         |
| negative | Regulation: | ABCC1     | --- | chemosensitivity | 23686318 | 10.1124/dmd.113.052092      |
| negative | Regulation: | ABCC1     | --- | chemosensitivity | 23686318 | 10.1124/dmd.113.052092      |
| negative | Regulation: | ABCC1     | --- | chemosensitivity | 25895710 | 10.1007/978-3-319-16537-0_7 |
| negative | Regulation: | ABCC1     | --- | chemosensitivity |          | 10.1186/s12935-019-0943-6   |
| negative | Regulation: | ABCC1     | --- | chemosensitivity | 34510251 | 10.1007/s00280-021-04337-8  |
| negative | Regulation: | DDIT4-AS1 | --- | chemosensitivity | 36056355 | 10.1186/s12943-022-01647-0  |
| negative | Regulation: | DDIT4-AS1 | --- | chemosensitivity | 36056355 | 10.1186/s12943-022-01647-0  |
| negative | Regulation: | DDIT4-AS1 | --- | chemosensitivity | 36056355 | 10.1186/s12943-022-01647-0  |
| negative | Regulation: | DDIT4-AS1 | --- | chemosensitivity | 36056355 | 10.1186/s12943-022-01647-0  |
| negative | Regulation: | DDIT4-AS1 | --- | chemosensitivity | 36056355 | 10.1186/s12943-022-01647-0  |
| negative | Regulation: | DDIT4-AS1 | --- | chemosensitivity | 36056355 | 10.1186/s12943-022-01647-0  |
| negative | Regulation: | DDIT4-AS1 | --- | chemosensitivity | 36056355 | 10.1186/s12943-022-01647-0  |
| negative | Regulation: | DDIT4-AS1 | --- | chemosensitivity | 36056355 | 10.1186/s12943-022-01647-0  |
| negative | Regulation: | DDIT4-AS1 | --- | chemosensitivity | 36056355 | 10.1186/s12943-022-01647-0  |
| negative | Regulation: | DDIT4-AS1 | --- | chemosensitivity | 36056355 | 10.1186/s12943-022-01647-0  |
| negative | Regulation: | MIR1238   | --- | chemosensitivity | 30917935 | 10.1016/j.ebiom.2019.03.016 |
| negative | Regulation: | TERT      | --- | chemosensitivity | 26772886 | 10.1016/j.bbrc.2016.01.014  |
| negative | Regulation: | TERT      | --- | chemosensitivity | 30716337 | 10.1016/j.lfs.2019.02.005   |
| negative | Regulation: | TERT      | --- | chemosensitivity |          | 10.1016/j.annonc.2020.08.46 |
| negative | Regulation: | TERT      | --- | chemosensitivity | 33631540 | 10.1016/j.ejca.2021.01.014  |



|          |             |       |     |                  |          |                             |
|----------|-------------|-------|-----|------------------|----------|-----------------------------|
| negative | Regulation: | TERT  | --- | chemosensitivity | 18708758 | 10.4161/cbt.7.10.6539       |
| negative | Regulation: | TERT  | --- | chemosensitivity | 26497550 | 10.18632/oncotarget.5468    |
| negative | Regulation: | MIR21 | --- | chemosensitivity | 28495512 | 10.1016/j.abb.2017.05.001   |
| negative | Regulation: | MIR21 | --- | chemosensitivity | 29890129 | 10.1016/j.cbi.2018.06.006   |
| negative | Regulation: | MIR21 | --- | chemosensitivity | 24140396 | 10.1053/j.gastro.2013.10.01 |
| negative | Regulation: | MIR21 | --- | chemosensitivity | 30802686 | 10.1016/j.biomaterials.2019 |
| negative | Regulation: | MIR21 | --- | chemosensitivity | 32035242 | 10.1016/j.gene.2020.144453  |
| negative | Regulation: | MIR21 | --- | chemosensitivity | 32428836 | 10.1016/j.biopha.2020.11023 |
| negative | Regulation: | MIR21 | --- | chemosensitivity | 28400205 | 10.1016/j.tiv.2017.04.007   |
| negative | Regulation: | MIR21 | --- | chemosensitivity | 29196189 | 10.1016/j.semcaner.2017.11  |
| negative | Regulation: | MIR21 | --- | chemosensitivity | 33865701 | 10.1016/j.semcd.2021.04.00  |
| negative | Regulation: | MIR21 | --- | chemosensitivity | 32828020 | 10.1016/j.oraloncology.2020 |
| negative | Regulation: | MIR21 | --- | chemosensitivity | 27623176 | 10.1016/j.molmed.2016.08.00 |
| negative | Regulation: | MIR21 | --- | chemosensitivity | 30579238 | 10.1016/j.canep.2018.12.008 |
| negative | Regulation: | MIR21 | --- | chemosensitivity | 30597288 | 10.1016/j.tranon.2018.12.00 |
| negative | Regulation: | MIR21 | --- | chemosensitivity | 28718444 | 10.1016/j.trecan.2016.12.00 |
| negative | Regulation: | MIR21 | --- | chemosensitivity | 22130252 | 10.1016/j.acthis.2011.11.00 |
| negative | Regulation: | MIR21 | --- | chemosensitivity | 22130252 | 10.1016/j.acthis.2011.11.00 |
| negative | Regulation: | MIR21 | --- | chemosensitivity | 21376256 | 10.1016/j.arcmed.2011.01.00 |
| negative | Regulation: | MIR21 | --- | chemosensitivity | 21376256 | 10.1016/j.arcmed.2011.01.00 |
| negative | Regulation: | MIR21 | --- | chemosensitivity | 21820606 | 10.1016/j.arcmed.2011.06.00 |
| negative | Regulation: | MIR21 | --- | chemosensitivity | 21820606 | 10.1016/j.arcmed.2011.06.00 |
| negative | Regulation: | MIR21 | --- | chemosensitivity | 20219416 | 10.1016/j.oraloncology.2010 |
| negative | Regulation: | MIR21 | --- | chemosensitivity | 23177026 | 10.1016/j.molonc.2012.10.01 |
| negative | Regulation: | MIR21 | --- | chemosensitivity | 24148247 | 10.1016/j.bbrc.2013.10.051  |
| negative | Regulation: | MIR21 | --- | chemosensitivity | 24472409 | 10.1016/j.ygyno.2014.01.034 |
| negative | Regulation: | MIR21 | --- | chemosensitivity | 25304373 | 10.1016/j.canlet.2014.09.03 |
| negative | Regulation: | MIR21 | --- | chemosensitivity | 24906642 | 10.1016/j.cancergen.2014.04 |
| negative | Regulation: | MIR21 | --- | chemosensitivity | 24906642 | 10.1016/j.cancergen.2014.04 |
| negative | Regulation: | MIR21 | --- | chemosensitivity | 26142886 | 10.1016/j.abb.2015.07.001   |
| negative | Regulation: | MIR21 | --- | chemosensitivity | 27162073 | 10.1016/j.biomaterials.2016 |
| negative | Regulation: | MIR21 | --- | chemosensitivity | 20113523 |                             |
| negative | Regulation: | MIR21 | --- | chemosensitivity | 20113523 |                             |
| negative | Regulation: | MIR21 | --- | chemosensitivity | 20113523 |                             |
| negative | Regulation: | MIR21 | --- | chemosensitivity | 26975392 | 10.1186/s12885-016-2231-3   |
| negative | Regulation: | MIR21 | --- | chemosensitivity | 27070574 | 10.3390/ijms17040517        |
| negative | Regulation: | MIR21 | --- | chemosensitivity | 27573902 | 10.1007/978-3-319-42059-2_1 |
| negative | Regulation: | MIR21 | --- | chemosensitivity | 26223974 | 10.1186/s13048-015-0178-7   |
| negative | Regulation: | MIR21 | --- | chemosensitivity | 27712594 | 10.3727/096504016X146850341 |
| negative | Regulation: | MIR21 | --- | chemosensitivity | 27748936 | 10.3892/or.2016.5140        |
| negative | Regulation: | MIR21 | --- | chemosensitivity | 27448297 | 10.1007/s13277-016-5216-6   |
| negative | Regulation: | MIR21 | --- | chemosensitivity | 28407783 | 10.1186/s13046-017-0528-y   |
| negative | Regulation: | MIR21 | --- | chemosensitivity | 28407783 | 10.1186/s13046-017-0528-y   |
| negative | Regulation: | MIR21 | --- | chemosensitivity | 28799568 | 10.1038/cgt.2017.20         |
| negative | Regulation: | MIR21 | --- | chemosensitivity | 29242381 | 10.1042/BCJ20170079         |
| negative | Regulation: | MIR21 | --- | chemosensitivity | 27063218 | 10.1038/aps.2015.152        |
| negative | Regulation: | MIR21 | --- | chemosensitivity | 30194558 | 10.1007/s11033-018-4358-6   |
| negative | Regulation: | MIR21 | --- | chemosensitivity | 30597867 | 10.3390/ijms20010103        |
| negative | Regulation: | MIR21 | --- | chemosensitivity | 30249919 | 10.2176/nmc.ra.2018-0141    |
| negative | Regulation: | MIR21 | --- | chemosensitivity | 30421325 | 10.1007/s12192-018-0946-6   |
| negative | Regulation: | MIR21 | --- | chemosensitivity | 30600466 | 10.1007/s10616-018-0291-8   |
| negative | Regulation: | MIR21 | --- | chemosensitivity | 30088452 | 10.2174/1871520618666180808 |
| negative | Regulation: | MIR21 | --- | chemosensitivity | 31225740 | 10.1089/dna.2018.4529       |
| negative | Regulation: | MIR21 | --- | chemosensitivity | 31225740 | 10.1089/dna.2018.4529       |

|          |             |       |     |                  |          |                             |
|----------|-------------|-------|-----|------------------|----------|-----------------------------|
| negative | Regulation: | MIR21 | --- | chemosensitivity | 31225740 | 10.1089/dna.2018.4529       |
| negative | Regulation: | MIR21 | --- | chemosensitivity | 31621692 | 10.12659/MSM.917082         |
| negative | Regulation: | MIR21 | --- | chemosensitivity | 32098295 | 10.3390/i.jms21041495       |
| negative | Regulation: | MIR21 | --- | chemosensitivity | 32811810 | 10.1038/s41419-020-02821-2  |
| negative | Regulation: | MIR21 | --- | chemosensitivity | 33000186 | 10.3892/mmr.2020.11447      |
| negative | Regulation: | MIR21 | --- | chemosensitivity | 33112535 | 10.31557/APJCP.2020.21.10.2 |
| negative | Regulation: | MIR21 | --- | chemosensitivity | 33650661 | 10.3892/or.2021.7925        |
| negative | Regulation: | MIR21 | --- | chemosensitivity | 33481665 | 10.1089/dna.2020.6087       |
| negative | Regulation: | MIR21 | --- | chemosensitivity | 34088891 | 10.1038/s41419-021-03803-8  |
| negative | Regulation: | MIR21 | --- | chemosensitivity | 22753745 |                             |
| negative | Regulation: | MIR21 | --- | chemosensitivity | 22249446 | 10.1007/s11033-011-1350-9   |
| negative | Regulation: | MIR21 | --- | chemosensitivity | 23321165 |                             |
| negative | Regulation: | MIR21 | --- | chemosensitivity | 20670480 | 10.1179/102453310X126470836 |
| negative | Regulation: | MIR21 | --- | chemosensitivity | 20670480 | 10.1179/102453310X126470836 |
| negative | Regulation: | MIR21 | --- | chemosensitivity | 21139417 | 10.4161/cbt.10.12.14252     |
| negative | Regulation: | MIR21 | --- | chemosensitivity | 21468550 | 10.3892/or.2011.1245        |
| negative | Regulation: | MIR21 | --- | chemosensitivity | 21468550 | 10.3892/or.2011.1245        |
| negative | Regulation: | MIR21 | --- | chemosensitivity | 21468550 | 10.3892/or.2011.1245        |
| negative | Regulation: | MIR21 | --- | chemosensitivity | 21468550 | 10.3892/or.2011.1245        |
| negative | Regulation: | MIR21 | --- | chemosensitivity | 20143188 | 10.1007/s12032-009-9413-7   |
| negative | Regulation: | MIR21 | --- | chemosensitivity |          |                             |
| negative | Regulation: | MIR21 | --- | chemosensitivity | 21685938 | 10.1038/onc.2011.222        |
| negative | Regulation: | MIR21 | --- | chemosensitivity | 23527297 | 10.1371/journal.pone.006003 |
| negative | Regulation: | MIR21 | --- | chemosensitivity | 24324076 |                             |
| negative | Regulation: | MIR21 | --- | chemosensitivity | 24899890 | 10.1155/2014/386561         |
| negative | Regulation: | MIR21 | --- | chemosensitivity | 24696266 | 10.1007/s12035-014-8679-8   |
| negative | Regulation: | MIR21 | --- | chemosensitivity | 25756509 | 10.1080/15384047.2014.10012 |
| negative | Regulation: | MIR21 | --- | chemosensitivity | 26035292 | 10.3892/i.jo.2015.3026      |
| negative | Regulation: | MIR21 | --- | chemosensitivity | 26116372 | 10.1186/s12967-015-0570-5   |
| negative | Regulation: | MIR21 | --- | chemosensitivity | 20113523 | 10.1186/1471-2407-10-2710.1 |
| negative | Regulation: | MIR21 | --- | chemosensitivity | 21685938 | 10.1038/onc.2011.22210.1038 |
| negative | Regulation: | MIR21 | --- | chemosensitivity | 21820606 | 10.1016/j.arcmed.2011.06.00 |
| negative | Regulation: | MIR21 | --- | chemosensitivity | 22753745 |                             |
| negative | Regulation: | MIR21 | --- | chemosensitivity | 23564788 |                             |
| negative | Regulation: | MIR21 | --- | chemosensitivity | 24606718 | 10.1186/1476-4598-13-5210.1 |
| negative | Regulation: | MIR21 | --- | chemosensitivity | 24961346 | 10.1007/s13277-014-2068-910 |
| negative | Regulation: | MIR21 | --- | chemosensitivity | 27179559 | 10.1016/j.clinre.2016.02.01 |
| negative | Regulation: | MIR21 | --- | chemosensitivity | 28714373 | 10.1177/101042831770737210. |
| negative | Regulation: | MIR21 | --- | chemosensitivity | 24609942 | 10.1007/s11010-014-1976-810 |
| negative | Regulation: | MIR21 | --- | chemosensitivity | 24609942 | 10.1007/s11010-014-1976-810 |
| negative | Regulation: | MIR21 | --- | chemosensitivity | 25232387 |                             |
| negative | Regulation: | MIR21 | --- | chemosensitivity | 1087     | 10.1016/j.trecan.2016.12.00 |
| negative | Regulation: | MIR21 | --- | chemosensitivity |          | 10.1016/j.acthis.2011.11.00 |
| negative | Regulation: | MIR21 | --- | chemosensitivity |          | 10.1016/j.acthis.2011.11.00 |
| negative | Regulation: | MIR21 | --- | chemosensitivity |          | 10.3390/i.jms20010103       |
| negative | Regulation: | MIR21 | --- | chemosensitivity |          | 10.1007/s10616-018-0291-8   |
| negative | Regulation: | MIR21 | --- | chemosensitivity |          | 10.1089/dna.2018.4529       |
| negative | Regulation: | MIR21 | --- | chemosensitivity |          | 10.1089/dna.2018.4529       |
| negative | Regulation: | MIR21 | --- | chemosensitivity |          | 10.1089/dna.2018.4529       |
| negative | Regulation: | MIR21 | --- | chemosensitivity |          | 10.12659/MSM.917082         |
| negative | Regulation: | MIR21 | --- | chemosensitivity | 23276982 |                             |
| negative | Regulation: | MIR21 | --- | chemosensitivity |          | 10.2174/1389450111314100001 |
| negative | Regulation: | MIR21 | --- | chemosensitivity | 23834156 | 10.2174/1389450111314999018 |
| negative | Regulation: | MIR21 | --- | chemosensitivity | 20711171 | 10.1038/modpathol.2010.135  |

|          |             |        |      |                  |          |                             |
|----------|-------------|--------|------|------------------|----------|-----------------------------|
| negative | Regulation: | MIR21  | ---- | chemosensitivity |          | 10.2174/1566524014666140603 |
| negative | Regulation: | MIR21  | ---- | chemosensitivity | 25845681 | 10.3892/or.2015.3891        |
| negative | Regulation: | MIR21  | ---- | chemosensitivity | 26116372 | 10.1186/s12967-015-0570-5   |
| negative | Regulation: | MIR21  | ---- | chemosensitivity |          | 10.1097/CCO.000000000000023 |
| negative | Regulation: | MIR21  | ---- | chemosensitivity | 27021436 | 10.1038/ncomms11150         |
| negative | Regulation: | MIR21  | ---- | chemosensitivity | 21820606 | 10.1016/j.arcmed.2011.06.00 |
| negative | Regulation: | MIR21  | ---- | chemosensitivity | 31033015 | 10.1002/jcb.2874710.1002/jc |
| negative | Regulation: | MIR21  | ---- | chemosensitivity | 31033015 | 10.1002/jcb.2874710.1002/jc |
| negative | Regulation: | MIR21  | ---- | chemosensitivity | 23834154 |                             |
| negative | Regulation: | MIR21  | ---- | chemosensitivity | 24472409 | 10.1016/j.ygyno.2014.01.034 |
| negative | Regulation: | MIR21  | ---- | chemosensitivity | 28686971 | 10.1016/j.biopha.2017.06.08 |
| negative | Regulation: | MIR21  | ---- | chemosensitivity | 28714373 | 10.1177/101042831770737210. |
| negative | Regulation: | MIR21  | ---- | chemosensitivity |          | 10.3892/or.2021.7925        |
| negative | Regulation: | MIR21  | ---- | chemosensitivity |          | 10.1016/j.semcd.2021.04.00  |
| negative | Regulation: | MIR21  | ---- | chemosensitivity | 34453645 | 10.1007/s11010-021-04249-4  |
| negative | Regulation: | MIR21  | ---- | chemosensitivity |          | 10.1615/CritRevEukaryotGene |
| negative | Regulation: | MIR21  | ---- | chemosensitivity | 34145425 | 10.1038/s41417-021-00356-y  |
| negative | Regulation: | MIR21  | ---- | chemosensitivity | 36083475 | 10.19852/j.cnki.jtcm.2022.C |
| negative | Regulation: | MIR21  | ---- | chemosensitivity | 36293478 | 10.3390/ijsms232012625      |
| negative | Regulation: | WNT10A | ---- | chemosensitivity | 23094073 | 10.1371/journal.pone.004764 |
| negative | Regulation: | WNT10A | ---- | chemosensitivity | 23094073 | 10.1371/journal.pone.004764 |
| negative | Regulation: | FCHSD2 | ---- | chemosensitivity | 22902056 | 10.1016/j.leukres.2012.06.C |
| negative | Regulation: | AURKA  | ---- | chemosensitivity | 28242198 | 10.1016/j.bbrc.2017.02.120  |
| negative | Regulation: | AURKA  | ---- | chemosensitivity | 28242198 | 10.1016/j.bbrc.2017.02.120  |
| negative | Regulation: | AURKA  | ---- | chemosensitivity | 18160664 | 10.1182/blood-2007-07-09932 |
| negative | Regulation: | AURKA  | ---- | chemosensitivity | 27461831 | 10.1016/j.prp.2016.05.004   |
| negative | Regulation: | AURKA  | ---- | chemosensitivity | 31362850 | 10.1016/j.tcb.2019.06.005   |
| negative | Regulation: | AURKA  | ---- | chemosensitivity | 19157502 | 10.1016/j.humpath.2008.10.C |
| negative | Regulation: | AURKA  | ---- | chemosensitivity | 20598352 | 10.1016/j.acthis.2010.05.00 |
| negative | Regulation: | AURKA  | ---- | chemosensitivity | 20598352 | 10.1016/j.acthis.2010.05.00 |
| negative | Regulation: | AURKA  | ---- | chemosensitivity | 24480319 | 10.1016/j.bbcan.2014.01.007 |
| negative | Regulation: | AURKA  | ---- | chemosensitivity | 24613085 | 10.1016/j.jnutbio.2014.01.C |
| negative | Regulation: | AURKA  | ---- | chemosensitivity | 24613085 | 10.1016/j.jnutbio.2014.01.C |
| negative | Regulation: | AURKA  | ---- | chemosensitivity | 27138904 | 10.1016/j.yexpr.2016.04.012 |
| negative | Regulation: | AURKA  | ---- | chemosensitivity | 25987188 | 10.1186/s12943-015-0375-4   |
| negative | Regulation: | AURKA  | ---- | chemosensitivity | 28167680 | 10.1242/jcs.196790          |
| negative | Regulation: | AURKA  | ---- | chemosensitivity | 27396604 | 10.2174/1568009616666160630 |
| negative | Regulation: | AURKA  | ---- | chemosensitivity | 28849180 | 10.3892/or.2017.5908        |
| negative | Regulation: | AURKA  | ---- | chemosensitivity | 29333101 | 10.7150/ijsms.22513         |
| negative | Regulation: | AURKA  | ---- | chemosensitivity | 29367628 | 10.1038/s41419-017-0137-x   |
| negative | Regulation: | AURKA  | ---- | chemosensitivity | 28786875 | 10.1097/IGC.000000000000108 |
| negative | Regulation: | AURKA  | ---- | chemosensitivity | 31647033 | 10.1186/s12931-019-1194-8   |
| negative | Regulation: | AURKA  | ---- | chemosensitivity | 32576205 | 10.1186/s12964-020-00591-0  |
| negative | Regulation: | AURKA  | ---- | chemosensitivity | 23037716 | 10.1038/bjc.2012.450        |
| negative | Regulation: | AURKA  | ---- | chemosensitivity | 23348568 | 10.1038/cdd.2012.169        |
| negative | Regulation: | AURKA  | ---- | chemosensitivity | 23474708 | 10.1038/aps.2012.197        |
| negative | Regulation: | AURKA  | ---- | chemosensitivity | 22281755 | 10.1038/cgt.2011.89         |
| negative | Regulation: | AURKA  | ---- | chemosensitivity | 25625960 | 10.3892/ijo.2015.2842       |
| negative | Regulation: | AURKA  | ---- | chemosensitivity | 25625960 | 10.3892/ijo.2015.2842       |
| negative | Regulation: | AURKA  | ---- | chemosensitivity | 25889801 | 10.1186/s12943-015-0348-7   |
| negative | Regulation: | AURKA  | ---- | chemosensitivity |          |                             |
| negative | Regulation: | AURKA  | ---- | chemosensitivity | 27082306 | 10.1080/15384047.2016.11776 |
| negative | Regulation: | AURKA  | ---- | chemosensitivity | 17317845 | 10.1158/1078-0432.CCR-06-11 |
| negative | Regulation: | AURKA  | ---- | chemosensitivity | 17317845 | 10.1158/1078-0432.CCR-06-11 |

|          |             |           |     |                  |          |                             |
|----------|-------------|-----------|-----|------------------|----------|-----------------------------|
| negative | Regulation: | AURKA     | --- | chemosensitivity | 19671766 | 10.1158/1535-7163.MCT-08-08 |
| negative | Regulation: | AURKA     | --- | chemosensitivity | 19912186 | 10.1111/j.1464-410X.2009.09 |
| negative | Regulation: | AURKA     | --- | chemosensitivity | 20232424 | 10.1002/pbc.2246510.1002/pb |
| negative | Regulation: | AURKA     | --- | chemosensitivity | 22281755 | 10.1038/cgt.2011.8910.1038/ |
| negative | Regulation: | AURKA     | --- | chemosensitivity | 22848254 | 10.3892/ol.2011.295         |
| negative | Regulation: | AURKA     | --- | chemosensitivity | 22848254 | 10.3892/ol.2011.295         |
| negative | Regulation: | AURKA     | --- | chemosensitivity | 24277377 | 10.1007/s13277-013-1393-810 |
| negative | Regulation: | AURKA     | --- | chemosensitivity | 24613085 | 10.1016/j.jnutbio.2014.01.0 |
| negative | Regulation: | AURKA     | --- | chemosensitivity | 25428915 | 10.18632/oncotarget.2682    |
| negative | Regulation: | AURKA     | --- | chemosensitivity | 25625960 | 10.3892/ijo.2015.284210.389 |
| negative | Regulation: | AURKA     | --- | chemosensitivity | 27396604 | 10.2174/1568009616666160630 |
| negative | Regulation: | AURKA     | --- | chemosensitivity | 29207686 | 10.18632/oncotarget.2061010 |
| negative | Regulation: | AURKA     | --- | chemosensitivity | 30431113 | 10.3892/or.2018.6858        |
| negative | Regulation: | AURKA     | --- | chemosensitivity | 26045992 |                             |
| negative | Regulation: | AURKA     | --- | chemosensitivity | 35216255 | 10.3390/ijms23042144        |
| negative | Regulation: | AURKA     | --- | chemosensitivity | 35428744 | 10.12659/MSM.934799         |
| negative | Regulation: | AURKA     | --- | chemosensitivity | 35917645 | 10.1016/j.tranon.2022.10149 |
| negative | Regulation: | CASC9     | --- | chemosensitivity | 28146436 | 10.18632/oncotarget.1487110 |
| negative | Regulation: | EPHA8     | --- | chemosensitivity | 34278497 | 10.3892/OR.2021.8134        |
| negative | Regulation: | EPHA8     | --- | chemosensitivity | 34278497 | 10.3892/or.2021.813410.3892 |
| negative | Regulation: | SNHG12    | --- | chemosensitivity | 31743769 | 10.1016/j.gene.2019.144145  |
| negative | Regulation: | MIR224    | --- | chemosensitivity | 28272374 | 10.3390/molecules22030417   |
| negative | Regulation: | MIR224    | --- | chemosensitivity | 28079894 | 10.1038/cddis.2016.461      |
| negative | Regulation: | MIR224    | --- | chemosensitivity | 24921914 | 10.1038/bjc.2014.157        |
| negative | Regulation: | MIR224    | --- | chemosensitivity | 25919696 | 10.1038/bjc.2015.125        |
| negative | Regulation: | MIR224    | --- | chemosensitivity | 25919696 | 10.1038/bjc.2015.125        |
| negative | Regulation: | MIR224    | --- | chemosensitivity | 25919696 | 10.1038/bjc.2015.12510.1038 |
| negative | Regulation: | MIR224    | --- | chemosensitivity |          | 10.3892/or.2018.6929        |
| negative | Regulation: | MIR224    | --- | chemosensitivity |          | 10.3892/or.2018.6929        |
| negative | Regulation: | MIR224    | --- | chemosensitivity |          | 10.3892/or.2018.6929        |
| negative | Regulation: | HNRNPA2B1 | --- | chemosensitivity | 28351333 | 10.1177/1010428317694318    |
| negative | Regulation: | HNRNPA2B1 | --- | chemosensitivity | 23525071 | 10.1097/CAD.0b013e3283608bc |
| negative | Regulation: | HNRNPA2B1 | --- | chemosensitivity | 23525071 | 10.1097/CAD.0b013e3283608bc |
| negative | Regulation: | ATG2B     | --- | chemosensitivity | 33824300 | 10.1038/s41419-021-03650-7  |
| negative | Regulation: | BCAR4     | --- | chemosensitivity | 36627684 | 10.1186/s13046-022-02588-8  |
| negative | Regulation: | RPRD1A    | --- | chemosensitivity | 34921137 | 10.1038/s41419-021-04447-4  |
| negative | Regulation: | APOBEC3B  | --- | chemosensitivity | 30226610 | 10.3892/or.2018.669810.3892 |
| negative | Regulation: | ABCG2     | --- | chemosensitivity | 21219875 | 10.1016/j.bcp.2010.12.018   |
| negative | Regulation: | ABCG2     | --- | chemosensitivity | 16844360 | 10.1016/j.ejps.2006.06.001  |
| negative | Regulation: | ABCG2     | --- | chemosensitivity | 23743354 | 10.1016/j.canlet.2013.05.03 |
| negative | Regulation: | ABCG2     | --- | chemosensitivity | 27573902 | 10.1007/978-3-319-42059-2_1 |
| negative | Regulation: | ABCG2     | --- | chemosensitivity | 28374336 | 10.1007/s13318-017-0411-4   |
| negative | Regulation: | ABCG2     | --- | chemosensitivity | 28942499 | 10.1007/s00432-017-2515-2   |
| negative | Regulation: | ABCG2     | --- | chemosensitivity | 30617282 | 10.1038/s12276-018-0197-8   |
| negative | Regulation: | ABCG2     | --- | chemosensitivity | 32565864 | 10.1155/2020/5062942        |
| negative | Regulation: | ABCG2     | --- | chemosensitivity | 32091329 | 10.2174/1381612826666200224 |
| negative | Regulation: | ABCG2     | --- | chemosensitivity | 17016657 |                             |
| negative | Regulation: | ABCG2     | --- | chemosensitivity | 22460269 | 10.1038/bjc.2012.81         |
| negative | Regulation: | ABCG2     | --- | chemosensitivity | 18248513 | 10.1111/j.1742-7843.2007.00 |
| negative | Regulation: | ABCG2     | --- | chemosensitivity | 27012188 | 10.1016/j.canlet.2016.03.03 |
| negative | Regulation: | ABCG2     | --- | chemosensitivity | 27293996 |                             |
| negative | Regulation: | ABCG2     | --- | chemosensitivity | 27671528 | 10.1158/1535-7163.MCT-15-07 |
| negative | Regulation: | ABCG2     | --- | chemosensitivity | 30617282 | 10.1038/s12276-018-0197-810 |
| negative | Regulation: | ABCG2     | --- | chemosensitivity | 34381520 | 10.1155/2021/3905367        |

|          |             |         |     |                  |          |                             |
|----------|-------------|---------|-----|------------------|----------|-----------------------------|
| negative | Regulation: | ABCG2   | --- | chemosensitivity | 34498146 | 10.1007/s00432-021-03793-2  |
| negative | Regulation: | ABCG2   | --- | chemosensitivity | 34830383 | 10.3390/ijms22221250210.339 |
| negative | Regulation: | ABCG2   | --- | chemosensitivity | 34830383 | 10.3390/ijms22221250210.339 |
| negative | Regulation: | SPA17   | --- | chemosensitivity | 19744347 |                             |
| negative | Regulation: | SPA17   | --- | chemosensitivity | 19744347 |                             |
| negative | Regulation: | SPA17   | --- | chemosensitivity | 19744347 | 10.1186/1471-2407-9-32310.1 |
| negative | Regulation: | SPA17   | --- | chemosensitivity | 19744347 | 10.1186/1471-2407-9-32310.1 |
| negative | Regulation: | CA1     | --- | chemosensitivity | 32668392 | 10.1016/j.omtn.2020.06.016  |
| negative | Regulation: | MAPK9   | --- | chemosensitivity | 27313779 | 10.7150/jca.1450610.7150/jc |
| negative | Regulation: | NCK1-DT | --- | chemosensitivity | 31570280 | 10.1016/j.prp.2019.152653   |
| negative | Regulation: | NCK1-DT | --- | chemosensitivity | 32858372 | 10.1016/j.prp.2020.153157   |
| negative | Regulation: | NCK1-DT | --- | chemosensitivity | 31972361 | 10.1016/j.biopha.2019.10974 |
| negative | Regulation: | NCK1-DT | --- | chemosensitivity | 31257479 | 10.3892/ijmm.2019.4261      |
| negative | Regulation: | NCK1-DT | --- | chemosensitivity | 31371629 | 10.1042/BSR20191226         |
| negative | Regulation: | NCK1-DT | --- | chemosensitivity | 30221354 | 10.1002/jcp.2719810.1002/jc |
| negative | Regulation: | MAPK8   | --- | chemosensitivity | 27313779 | 10.7150/jca.1450610.7150/jc |
| negative | Regulation: | ADM     | --- | chemosensitivity | 22294191 | 10.3892/or.2012.1655        |
| negative | Regulation: | ADM     | --- | chemosensitivity | 22294191 | 10.3892/or.2012.1655        |
| negative | Regulation: | ADM     | --- | chemosensitivity | 22294191 | 10.3892/or.2012.1655        |
| negative | Regulation: | ADM     | --- | chemosensitivity | 22294191 | 10.3892/or.2012.165510.3892 |
| negative | Regulation: | TAGLN   | --- | chemosensitivity | 32819569 | 10.1016/j.bbrc.2020.06.066  |
| negative | Regulation: | TAGLN   | --- | chemosensitivity | 32819569 | 10.1016/j.bbrc.2020.06.066  |
| negative | Regulation: | TAGLN   | --- | chemosensitivity | 32819569 | 10.1016/j.bbrc.2020.06.066  |
| negative | Regulation: | TAGLN   | --- | chemosensitivity | 32819569 | 10.1016/j.bbrc.2020.06.066  |
| negative | Regulation: | TAGLN   | --- | chemosensitivity | 32819569 | 10.1016/j.bbrc.2020.06.066  |
| negative | Regulation: | TAGLN   | --- | chemosensitivity | 32819569 | 10.1016/j.bbrc.2020.06.066  |
| negative | Regulation: | TAGLN   | --- | chemosensitivity | 32819569 | 10.1016/j.bbrc.2020.06.0661 |
| negative | Regulation: | TAGLN   | --- | chemosensitivity | 33478719 | 10.1016/j.bbrc.2021.01.0041 |
| negative | Regulation: | SRI     | --- | chemosensitivity | 30144438 | 10.1016/j.cca.2018.08.034   |
| negative | Regulation: | SRI     | --- | chemosensitivity | 27261590 | 10.1016/j.biopha.2016.04.00 |
| negative | Regulation: | SRI     | --- | chemosensitivity | 16859119 |                             |
| negative | Regulation: | SRI     | --- | chemosensitivity | 26045737 |                             |
| negative | Regulation: | PIN1    | --- | chemosensitivity | 28598431 | 10.1038/ncomms15772         |
| negative | Regulation: | PIN1    | --- | chemosensitivity | 30684192 | 10.1007/s12272-019-01122-3  |
| negative | Regulation: | PIN1    | --- | chemosensitivity | 28598431 | 10.1038/ncomms1577210.1038/ |
| negative | Regulation: | ATG5    | --- | chemosensitivity | 30862487 | 10.1016/j.canlet.2019.02.05 |
| negative | Regulation: | ATG5    | --- | chemosensitivity | 32735773 | 10.1016/j.ymthe.2020.07.019 |
| negative | Regulation: | ATG5    | --- | chemosensitivity | 30569180 | 10.3892/or.2018.6929        |
| negative | Regulation: | ATG5    | --- | chemosensitivity | 30569180 | 10.3892/or.2018.6929        |
| negative | Regulation: | ATG5    | --- | chemosensitivity | 30569180 | 10.3892/or.2018.6929        |
| negative | Regulation: | ATG5    | --- | chemosensitivity | 30569180 | 10.3892/or.2018.6929        |
| negative | Regulation: | ATG5    | --- | chemosensitivity | 32735773 | 10.1016/j.ymthe.2020.07.019 |
| negative | Regulation: | ATG5    | --- | chemosensitivity | 32735773 | 10.1016/j.ymthe.2020.07.019 |
| negative | Regulation: | ATG5    | --- | chemosensitivity | 30569180 | 10.3892/or.2018.692910.3892 |
| negative | Regulation: | CDK2    | --- | chemosensitivity | 33555529 | 10.1007/s11033-021-06193-4  |
| negative | Regulation: | CDK2    | --- | chemosensitivity | 24970653 | 10.3892/ijo.2014.2523       |
| negative | Regulation: | CDK2    | --- | chemosensitivity | 24970653 | 10.3892/ijo.2014.252310.389 |
| negative | Regulation: | FAIM2   | --- | chemosensitivity | 30617187 | 10.1042/CS20180814          |
| negative | Regulation: | HMGN5   | --- | chemosensitivity | 29710817 | 10.3390/ijms19051320        |
| negative | Regulation: | HMGN5   | --- | chemosensitivity | 31936777 | 10.3390/ijms21020449        |
| negative | Regulation: | HMGN5   | --- | chemosensitivity | 24664583 | 10.1007/s13277-014-1833-010 |
| negative | Regulation: | HMGN5   | --- | chemosensitivity | 26315299 | 10.3892/ijo.2015.313110.389 |
| negative | Regulation: | HMGN5   | --- | chemosensitivity | 26315299 | 10.3892/ijo.2015.313110.389 |
| negative | Regulation: | HMGN5   | --- | chemosensitivity | 29163683 | 10.3892/ol.2017.704510.3892 |

|                      |         |     |  |                  |          |                             |
|----------------------|---------|-----|--|------------------|----------|-----------------------------|
| negative Regulation: | HMG5    | --- |  | chemosensitivity | 29163683 | 10.3892/ol.2017.704510.3892 |
| negative Regulation: | MIR487A | --- |  | chemosensitivity | 30194558 | 10.1007/s11033-018-4358-6   |
| negative Regulation: | MDM4    | --- |  | chemosensitivity |          | 10.31083/j.ceog4902054      |
| negative Regulation: | MDM4    | --- |  | chemosensitivity |          | 10.31083/j.ceog4902054      |
| negative Regulation: | PLAT    | --- |  | chemosensitivity | 30458112 | 10.1096/fj.201801339RRR10.1 |
| negative Regulation: | H19     | --- |  | chemosensitivity | 30244121 | 10.1016/j.taap.2018.09.018  |
| negative Regulation: | H19     | --- |  | chemosensitivity | 32736275 | 10.1016/j.ijporl.2020.11024 |
| negative Regulation: | H19     | --- |  | chemosensitivity | 30244121 | 10.1016/j.taap.2018.09.0181 |
| negative Regulation: | H19     | --- |  | chemosensitivity | 30519041 | 10.2147/OTT.S17237910.2147/ |
| negative Regulation: | H19     | --- |  | chemosensitivity | 30843379 | 10.1002/cam4.186010.1002/ca |
| negative Regulation: | H19     | --- |  | chemosensitivity | 32736275 | 10.1016/j.ijporl.2020.11024 |
| negative Regulation: | HSPA9   | --- |  | chemosensitivity | 30776464 | 10.1016/j.gene.2019.02.033  |
| negative Regulation: | CCAR2   | --- |  | chemosensitivity | 34021129 | 10.1038/s41419-021-03798-2  |
| negative Regulation: | IGF1R   | --- |  | chemosensitivity | 28433634 | 10.1016/j.bbrc.2017.04.100  |
| negative Regulation: | IGF1R   | --- |  | chemosensitivity | 28433634 | 10.1016/j.bbrc.2017.04.100  |
| negative Regulation: | IGF1R   | --- |  | chemosensitivity | 33945846 | 10.1016/j.bbcan.2021.188557 |
| negative Regulation: | IGF1R   | --- |  | chemosensitivity | 32887025 | 10.1016/j.biopha.2020.11039 |
| negative Regulation: | IGF1R   | --- |  | chemosensitivity | 21782884 | 10.1016/j.mce.2011.07.002   |
| negative Regulation: | IGF1R   | --- |  | chemosensitivity | 17506723 |                             |
| negative Regulation: | IGF1R   | --- |  | chemosensitivity | 20543858 |                             |
| negative Regulation: | IGF1R   | --- |  | chemosensitivity | 19603014 |                             |
| negative Regulation: | IGF1R   | --- |  | chemosensitivity | 27405474 | 10.1186/s12885-016-2437-4   |
| negative Regulation: | IGF1R   | --- |  | chemosensitivity | 28051262 |                             |
| negative Regulation: | IGF1R   | --- |  | chemosensitivity | 28627639 | 10.3892/mmr.2017.6788       |
| negative Regulation: | IGF1R   | --- |  | chemosensitivity | 29393438 | 10.3892/mmr.2018.8497       |
| negative Regulation: | IGF1R   | --- |  | chemosensitivity | 29273680 | 10.1530/JME-17-0250         |
| negative Regulation: | IGF1R   | --- |  | chemosensitivity | 29273680 | 10.1530/JME-17-0250         |
| negative Regulation: | IGF1R   | --- |  | chemosensitivity | 31230061 | 10.12659/MSM.915503         |
| negative Regulation: | IGF1R   | --- |  | chemosensitivity | 32341579 | 10.1038/s41591-020-0821-8   |
| negative Regulation: | IGF1R   | --- |  | chemosensitivity | 20376536 | 10.1007/s11010-010-0453-2   |
| negative Regulation: | IGF1R   | --- |  | chemosensitivity | 20376536 | 10.1007/s11010-010-0453-2   |
| negative Regulation: | IGF1R   | --- |  | chemosensitivity | 20376536 | 10.1007/s11010-010-0453-2   |
| negative Regulation: | IGF1R   | --- |  | chemosensitivity | 23574723 | 10.4161/cc.24477            |
| negative Regulation: | IGF1R   | --- |  | chemosensitivity |          | 10.2174/1871520611313030003 |
| negative Regulation: | IGF1R   | --- |  | chemosensitivity | 20543858 | 10.1038/onc.2010.205        |
| negative Regulation: | IGF1R   | --- |  | chemosensitivity | 24103397 | 10.1186/1757-2215-6-71      |
| negative Regulation: | IGF1R   | --- |  | chemosensitivity | 23990456 | 10.1007/s13277-013-1041-3   |
| negative Regulation: | IGF1R   | --- |  | chemosensitivity | 23990456 | 10.1007/s13277-013-1041-3   |
| negative Regulation: | IGF1R   | --- |  | chemosensitivity | 24960521 | 10.1038/clpt.2014.136       |
| negative Regulation: | IGF1R   | --- |  | chemosensitivity | 12209582 | 10.1002/ijc.10537           |
| negative Regulation: | IGF1R   | --- |  | chemosensitivity | 17446062 | 10.1016/j.ejca.2007.03.003  |
| negative Regulation: | IGF1R   | --- |  | chemosensitivity | 17908353 | 10.1017/S0022215107000606   |
| negative Regulation: | IGF1R   | --- |  | chemosensitivity | 18535748 | 10.1111/j.1745-7270.2008.00 |
| negative Regulation: | IGF1R   | --- |  | chemosensitivity | 18535748 | 10.1111/j.1745-7270.2008.00 |
| negative Regulation: | IGF1R   | --- |  | chemosensitivity | 20376536 | 10.1007/s11010-010-0453-21C |
| negative Regulation: | IGF1R   | --- |  | chemosensitivity | 20451373 | 10.1016/j.ejca.2010.03.0381 |
| negative Regulation: | IGF1R   | --- |  | chemosensitivity | 21442237 | 10.1007/s11010-011-0790-91C |
| negative Regulation: | IGF1R   | --- |  | chemosensitivity | 22165963 | 10.2174/156800912798888974  |
| negative Regulation: | IGF1R   | --- |  | chemosensitivity | 22275271 | 10.1002/jcb.2408010.1002/jc |
| negative Regulation: | IGF1R   | --- |  | chemosensitivity | 23589145 | 10.1007/s10620-013-2673-21C |
| negative Regulation: | IGF1R   | --- |  | chemosensitivity | 27405474 | 10.1186/s12885-016-2437-41C |
| negative Regulation: | IGF1R   | --- |  | chemosensitivity |          | 10.1530/JME-17-0250         |
| negative Regulation: | IGF1R   | --- |  | chemosensitivity |          | 10.1530/JME-17-0250         |
| negative Regulation: | IGF1R   | --- |  | chemosensitivity | 23574723 | 10.4161/cc.24477            |

|          |             |        |     |                  |          |                             |
|----------|-------------|--------|-----|------------------|----------|-----------------------------|
| negative | Regulation: | IGF1R  | --- | chemosensitivity | 35102541 | 10.14670/HH-18-425          |
| negative | Regulation: | IGF1R  | --- | chemosensitivity | 36361620 | 10.3390/ijms232112829       |
| negative | Regulation: | BCL6   | --- | chemosensitivity | 30420967 | 10.1155/2018/695350610.1155 |
| negative | Regulation: | XIST   | --- | chemosensitivity | 29130102 | 10.3892/or.2017.6056        |
| negative | Regulation: | XIST   | --- | chemosensitivity | 28961027 | 10.1080/15384101.2017.13610 |
| negative | Regulation: | XIST   | --- | chemosensitivity | 28961027 | 10.1080/15384101.2017.13610 |
| negative | Regulation: | XIST   | --- | chemosensitivity | 31646589 | 10.26355/eurrev_201910_1917 |
| negative | Regulation: | XIST   | --- | chemosensitivity | 31659146 | 10.12659/MSM.916075         |
| negative | Regulation: | XIST   | --- | chemosensitivity | 31659146 | 10.12659/MSM.916075         |
| negative | Regulation: | XIST   | --- | chemosensitivity | 31659146 | 10.12659/MSM.916075         |
| negative | Regulation: | XIST   | --- | chemosensitivity | 31659146 | 10.12659/MSM.916075         |
| negative | Regulation: | XIST   | --- | chemosensitivity | 31659146 | 10.12659/MSM.916075         |
| negative | Regulation: | XIST   | --- | chemosensitivity | 31659146 | 10.12659/MSM.916075         |
| negative | Regulation: | XIST   | --- | chemosensitivity | 31659146 | 10.12659/MSM.916075         |
| negative | Regulation: | XIST   | --- | chemosensitivity | 33191714 |                             |
| negative | Regulation: | XIST   | --- | chemosensitivity | 30207107 | 10.3802/jgo.2018.29.e9910.3 |
| negative | Regulation: | XIST   | --- | chemosensitivity | 32209729 | 10.18632/aging.10267310.186 |
| negative | Regulation: | XIST   | --- | chemosensitivity | 34930117 | 10.1186/s10020-021-00421-0  |
| negative | Regulation: | XIST   | --- | chemosensitivity | 34930117 | 10.1186/s10020-021-00421-0  |
| negative | Regulation: | XIST   | --- | chemosensitivity | 34930117 | 10.1186/s10020-021-00421-0  |
| negative | Regulation: | CIRBP  | --- | chemosensitivity | 19900510 | 10.1016/j.bbcan.2009.11.001 |
| negative | Regulation: | CIRBP  | --- | chemosensitivity | 26188505 | 10.1016/j.bbrc.2015.07.066  |
| negative | Regulation: | CIRBP  | --- | chemosensitivity | 29849797 | 10.3892/ol.2018.833810.3892 |
| negative | Regulation: | CIRBP  | --- | chemosensitivity | 35541895 | 10.7150/ijbs.69655          |
| negative | Regulation: | CD274  | --- | chemosensitivity | 26806807 | 10.1016/j.canlet.2015.12.00 |
| negative | Regulation: | CD274  | --- | chemosensitivity | 30172884 | 10.1016/j.tranon.2018.08.00 |
| negative | Regulation: | CD274  | --- | chemosensitivity | 33073683 | 10.1177/172460082092617210. |
| negative | Regulation: | CD274  | --- | chemosensitivity | 33030957 | 10.4149/neo_2020_200531N589 |
| negative | Regulation: | G6PD   | --- | chemosensitivity | 35213227 | 10.1126/sciadv.abf909610.11 |
| negative | Regulation: | G6PD   | --- | chemosensitivity | 35597872 | 10.1038/s41416-022-01843-1  |
| negative | Regulation: | TMEM98 | --- | chemosensitivity | 24608572 | 10.1158/1535-7163.MCT-13-08 |
| negative | Regulation: | UGCG   | --- | chemosensitivity | 33887691 | 10.1016/j.biopha.2021.11156 |
| negative | Regulation: | UGCG   | --- | chemosensitivity | 23133636 | 10.1371/journal.pone.004849 |
| negative | Regulation: | MALAT1 | --- | chemosensitivity | 28034748 | 10.1016/j.bbrc.2016.12.167  |
| negative | Regulation: | MALAT1 | --- | chemosensitivity | 28034748 | 10.1016/j.bbrc.2016.12.167  |
| negative | Regulation: | MALAT1 | --- | chemosensitivity | 32423796 | 10.1016/j.bbrc.2020.03.170  |
| negative | Regulation: | MALAT1 | --- | chemosensitivity | 31926239 | 10.1016/j.lfs.2020.117280   |
| negative | Regulation: | MALAT1 | --- | chemosensitivity | 29505924 | 10.1016/j.biopha.2018.02.13 |
| negative | Regulation: | MALAT1 | --- | chemosensitivity | 30970520 | 10.1016/j.biopha.2019.10872 |
| negative | Regulation: | MALAT1 | --- | chemosensitivity | 33346133 | 10.1016/j.semcancer.2020.12 |
| negative | Regulation: | MALAT1 | --- | chemosensitivity | 32036249 | 10.1016/j.omtn.2019.11.035  |
| negative | Regulation: | MALAT1 | --- | chemosensitivity | 27376734 | 10.1007/978-981-10-1498-7_5 |
| negative | Regulation: | MALAT1 | --- | chemosensitivity | 28394318 | 10.1038/labinvest.2017.41   |
| negative | Regulation: | MALAT1 | --- | chemosensitivity | 29168767 | 10.3390/ijms18122505        |
| negative | Regulation: | MALAT1 | --- | chemosensitivity | 31371629 | 10.1042/BSR20191226         |
| negative | Regulation: | MALAT1 | --- | chemosensitivity | 32141554 | 10.26355/eurrev_202002_2036 |
| negative | Regulation: | MALAT1 | --- | chemosensitivity | 32473641 | 10.1186/s12957-020-01884-x  |
| negative | Regulation: | MALAT1 | --- | chemosensitivity | 32623440 | 10.12659/MSM.922672         |
| negative | Regulation: | MALAT1 | --- | chemosensitivity | 32623440 | 10.12659/MSM.922672         |
| negative | Regulation: | MALAT1 | --- | chemosensitivity | 32623440 | 10.12659/MSM.922672         |
| negative | Regulation: | MALAT1 | --- | chemosensitivity | 33151424 | 10.1007/s00404-020-05858-y  |
| negative | Regulation: | MALAT1 | --- | chemosensitivity | 32748748 | 10.2174/1568009620999200730 |
| negative | Regulation: | MALAT1 | --- | chemosensitivity | 25811929 | 10.3390/ijms16046677        |
| negative | Regulation: | MALAT1 | --- | chemosensitivity | 25811929 | 10.3390/ijms16046677        |
| negative | Regulation: | MALAT1 | --- | chemosensitivity | 25811929 | 10.3390/ijms1604667710.3390 |





|                                                      |          |                             |
|------------------------------------------------------|----------|-----------------------------|
| negative Regulation: GGH ---  chemosensitivity       | 24045662 | 10.1038/bjc.2013.579        |
| negative Regulation: GGH ---  chemosensitivity       | 24045662 | 10.1038/bjc.2013.579        |
| negative Regulation: GGH ---  chemosensitivity       | 24045662 | 10.1038/bjc.2013.579        |
| negative Regulation: GGH ---  chemosensitivity       | 24045662 | 10.1038/bjc.2013.579        |
| negative Regulation: GGH ---  chemosensitivity       | 24045662 | 10.1038/bjc.2013.579        |
| negative Regulation: GGH ---  chemosensitivity       | 24045662 | 10.1038/bjc.2013.579        |
| negative Regulation: GGH ---  chemosensitivity       | 32256983 | 10.4162/nrp.2020.14.2.9510. |
| negative Regulation: MIR744 ---  chemosensitivity    |          | 10.1016/j.biopha.2021.11152 |
| negative Regulation: MIR744 ---  chemosensitivity    | 31553714 | 10.12659/MSM.919219         |
| negative Regulation: MIR744 ---  chemosensitivity    | 31884801 | 10.4149/neo_2019_190508N411 |
| negative Regulation: MIR744 ---  chemosensitivity    | 33847207 | 10.1080/15384047.2021.18987 |
| negative Regulation: MIR744 ---  chemosensitivity    | 31553714 | 10.12659/MSM.91921910.12659 |
| negative Regulation: CALR ---  chemosensitivity      | 33591948 | 10.18632/aging.202488       |
| negative Regulation: KLK11 ---  chemosensitivity     | 27882085 | 10.3892/etm.2016.3723       |
| negative Regulation: DYRK1A ---  chemosensitivity    | 29773344 | 10.1016/j.ejcb.2018.04.005  |
| negative Regulation: ZBED1 ---  chemosensitivity     | 31949791 |                             |
| negative Regulation: ZBED1 ---  chemosensitivity     | 31949791 |                             |
| negative Regulation: RNASEH2A ---  chemosensitivity  | 32509219 |                             |
| negative Regulation: CHD4 ---  chemosensitivity      | 26095183 | 10.1016/j.jhep.2015.06.009  |
| negative Regulation: CHD4 ---  chemosensitivity      | 26095183 | 10.1016/j.jhep.2015.06.009  |
| negative Regulation: CLDN2 ---  chemosensitivity     | 31923533 | 10.1016/j.bbamcr.2019.11864 |
| negative Regulation: CLDN2 ---  chemosensitivity     | 29597147 | 10.1016/j.jnutbio.2018.02.0 |
| negative Regulation: FTCD ---  chemosensitivity      | 24686083 | 10.1016/j.cellsig.2014.03.0 |
| negative Regulation: DUT ---  chemosensitivity       | 15322254 |                             |
| negative Regulation: LINC01021 ---  chemosensitivity | 29262524 | 10.18632/oncotarget.2224510 |
| negative Regulation: AKT1 ---  chemosensitivity      | 27038543 | 10.1016/j.bbrc.2016.03.141  |
| negative Regulation: AKT1 ---  chemosensitivity      | 27666600 | 10.1016/j.bcp.2016.09.022   |
| negative Regulation: AKT1 ---  chemosensitivity      | 33011222 | 10.1016/j.lfs.2020.118513   |
| negative Regulation: AKT1 ---  chemosensitivity      | 26276725 | 10.1016/j.canlet.2015.08.00 |
| negative Regulation: AKT1 ---  chemosensitivity      | 29753186 | 10.1016/j.tranon.2018.04.01 |
| negative Regulation: AKT1 ---  chemosensitivity      | 22387880 | 10.1016/j.regpep.2012.02.00 |
| negative Regulation: AKT1 ---  chemosensitivity      | 20079806 | 10.1016/j.bbcan.2010.01.002 |
| negative Regulation: AKT1 ---  chemosensitivity      | 22208970 | 10.1016/j.ijrobp.2011.09.04 |
| negative Regulation: AKT1 ---  chemosensitivity      | 19651067 | 10.1016/j.jamcollsurg.2009. |
| negative Regulation: AKT1 ---  chemosensitivity      | 24184201 | 10.1016/j.biopha.2013.10.00 |
| negative Regulation: AKT1 ---  chemosensitivity      | 21108789 |                             |
| negative Regulation: AKT1 ---  chemosensitivity      | 19078992 |                             |
| negative Regulation: AKT1 ---  chemosensitivity      | 15150572 |                             |
| negative Regulation: AKT1 ---  chemosensitivity      | 12373610 |                             |
| negative Regulation: AKT1 ---  chemosensitivity      | 27473470 | 10.1007/s10571-016-0410-z   |
| negative Regulation: AKT1 ---  chemosensitivity      | 28440463 | 10.3892/or.2017.5584        |
| negative Regulation: AKT1 ---  chemosensitivity      | 28849180 | 10.3892/or.2017.5908        |
| negative Regulation: AKT1 ---  chemosensitivity      | 28887606 | 10.1007/s10616-017-0134-z   |
| negative Regulation: AKT1 ---  chemosensitivity      | 30594239 | 10.1186/s40659-018-0205-4   |
| negative Regulation: AKT1 ---  chemosensitivity      |          |                             |
| negative Regulation: AKT1 ---  chemosensitivity      | 31665911 | 10.1177/0963689719885083    |
| negative Regulation: AKT1 ---  chemosensitivity      | 31665911 | 10.1177/0963689719885083    |
| negative Regulation: AKT1 ---  chemosensitivity      | 32945500 | 10.3892/or.2020.7710        |
| negative Regulation: AKT1 ---  chemosensitivity      | 33499874 | 10.1186/s13046-021-01854-5  |
| negative Regulation: AKT1 ---  chemosensitivity      | 33591948 | 10.18632/aging.202488       |
| negative Regulation: AKT1 ---  chemosensitivity      | 22873219 |                             |
| negative Regulation: AKT1 ---  chemosensitivity      | 22873219 |                             |
| negative Regulation: AKT1 ---  chemosensitivity      | 20878074 | 10.3892/ijo-00000778        |
| negative Regulation: AKT1 ---  chemosensitivity      | 21444628 | 10.1124/jpet.111.179663     |

|          |             |          |     |                  |          |                             |
|----------|-------------|----------|-----|------------------|----------|-----------------------------|
| negative | Regulation: | AKT1     | --- | chemosensitivity | 22312312 | 10.3390/ijms13011186        |
| negative | Regulation: | AKT1     | --- | chemosensitivity | 21108789 | 10.1186/1476-4598-9-305     |
| negative | Regulation: | AKT1     | --- | chemosensitivity | 23743572 | 10.3892/or.2013.2520        |
| negative | Regulation: | AKT1     | --- | chemosensitivity | 23743572 | 10.3892/or.2013.2520        |
| negative | Regulation: | AKT1     | --- | chemosensitivity | 23743572 | 10.3892/or.2013.2520        |
| negative | Regulation: | AKT1     | --- | chemosensitivity | 23613505 | 10.1177/0300060513480920    |
| negative | Regulation: | AKT1     | --- | chemosensitivity | 24232099 | 10.1038/cddis.2013.450      |
| negative | Regulation: | AKT1     | --- | chemosensitivity | 24232099 | 10.1038/cddis.2013.450      |
| negative | Regulation: | AKT1     | --- | chemosensitivity | 24255131 | 10.1074/mcp.M113.034025     |
| negative | Regulation: | AKT1     | --- | chemosensitivity | 24454800 | 10.1371/journal.pone.008511 |
| negative | Regulation: | AKT1     | --- | chemosensitivity | 24104394 | 10.1038/leu.2013.291        |
| negative | Regulation: | AKT1     | --- | chemosensitivity | 24784001 | 10.1016/j.neo.2014.03.008   |
| negative | Regulation: | AKT1     | --- | chemosensitivity | 24722292 | 10.1038/cddis.2014.136      |
| negative | Regulation: | AKT1     | --- | chemosensitivity | 25230779 | 10.3892/or.2014.3488        |
| negative | Regulation: | AKT1     | --- | chemosensitivity | 25230779 | 10.3892/or.2014.3488        |
| negative | Regulation: | AKT1     | --- | chemosensitivity | 21273759 | 10.1159/000322986           |
| negative | Regulation: | AKT1     | --- | chemosensitivity | 21597260 | 10.1159/000322849           |
| negative | Regulation: | AKT1     | --- | chemosensitivity | 26820593 | 10.3892/or.2016.4590        |
| negative | Regulation: | AKT1     | --- | chemosensitivity | 27220401 | 10.3892/or.2016.4820        |
| negative | Regulation: | AKT1     | --- | chemosensitivity | 15150572 | 10.1038/sj.bjc.6601876      |
| negative | Regulation: | AKT1     | --- | chemosensitivity | 18071906 | 10.1007/s10495-007-0165-6   |
| negative | Regulation: | AKT1     | --- | chemosensitivity | 18224693 | 10.1002/ijc.2337110.1002/ij |
| negative | Regulation: | AKT1     | --- | chemosensitivity | 19375813 | 10.1016/j.lungcan.2009.03.0 |
| negative | Regulation: | AKT1     | --- | chemosensitivity | 19625496 | 10.1158/1535-7163.MCT-09-01 |
| negative | Regulation: | AKT1     | --- | chemosensitivity | 20944098 |                             |
| negative | Regulation: | AKT1     | --- | chemosensitivity | 21273759 | 10.1159/00032298610.1159/00 |
| negative | Regulation: | AKT1     | --- | chemosensitivity | 21597260 | 10.1159/00032284910.1159/00 |
| negative | Regulation: | AKT1     | --- | chemosensitivity | 23530461 | 10.1111/ced.1213810.1111/ce |
| negative | Regulation: | AKT1     | --- | chemosensitivity | 23546174 | 10.3892/mmr.2013.140010.389 |
| negative | Regulation: | AKT1     | --- | chemosensitivity | 26629248 |                             |
| negative | Regulation: | AKT1     | --- | chemosensitivity | 27163202 | 10.1016/j.yexmp.2016.05.003 |
| negative | Regulation: | AKT1     | --- | chemosensitivity | 27301639 | 10.1016/j.bbrc.2016.06.0571 |
| negative | Regulation: | AKT1     | --- | chemosensitivity | 31001468 | 10.3389/fonc.2019.0018510.3 |
| negative | Regulation: | AKT1     | --- | chemosensitivity | 32945500 | 10.3892/or.2020.771010.3892 |
| negative | Regulation: | AKT1     | --- | chemosensitivity | 33876384 | 10.1007/s12031-021-01832-8  |
| negative | Regulation: | AKT1     | --- | chemosensitivity | 34542810 | 10.1007/s11427-020-1978-4   |
| negative | Regulation: | AKT1     | --- | chemosensitivity | 34792179 | 10.3892/or.2021.8229        |
| negative | Regulation: | AKT1     | --- | chemosensitivity | 35257265 | 10.1007/s10495-022-01718-z1 |
| negative | Regulation: | AKT1     | --- | chemosensitivity | 35354796 | 10.1038/s41419-022-04727-7  |
| negative | Regulation: | AKT1     | --- | chemosensitivity | 33783376 | 10.1097/CAD.000000000000107 |
| negative | Regulation: | TRIM59   | --- | chemosensitivity | 33240412 | 10.3892/ol.2020.1226710.389 |
| negative | Regulation: | NUSAP1   | --- | chemosensitivity | 30476929 | 10.12659/MSM.910364         |
| negative | Regulation: | NUSAP1   | --- | chemosensitivity | 32099387 | 10.2147/OTT.S23712710.2147/ |
| negative | Regulation: | SAMD4B   | --- | chemosensitivity | 34109425 | 10.3892/mmr.2021.12196      |
| negative | Regulation: | SAMD4B   | --- | chemosensitivity | 34109425 | 10.3892/mmr.2021.12196      |
| negative | Regulation: | TXNDC5   | --- | chemosensitivity | 26810069 | 10.1007/s13277-016-4891-7   |
| negative | Regulation: | TRIM27   | --- | chemosensitivity | 32825933 | 10.1016/j.prp.2020.153048   |
| negative | Regulation: | TRIM27   | --- | chemosensitivity | 32825933 | 10.1016/j.prp.2020.153048   |
| negative | Regulation: | TRIM27   | --- | chemosensitivity | 31648164 | 10.1016/j.biopha.2019.10955 |
| negative | Regulation: | TRIM27   | --- | chemosensitivity | 33251042 | 10.1016/j.omtn.2020.10.012  |
| negative | Regulation: | TRIM27   | --- | chemosensitivity | 33251042 | 10.1016/j.omtn.2020.10.012  |
| negative | Regulation: | TLR7     | --- | chemosensitivity | 26134824 | 10.3892/ijo.2015.3069       |
| negative | Regulation: | HSP90AA1 | --- | chemosensitivity | 31638211 | 10.3892/ijo.2019.4902       |
| negative | Regulation: | HSP90AA1 | --- | chemosensitivity | 33766957 | 10.1136/jclinpath-2020-2071 |

|                      |          |      |                  |          |                              |
|----------------------|----------|------|------------------|----------|------------------------------|
| negative Regulation: | FOXC2    | ---- | chemosensitivity | 27336949 | 10.1159/000445620            |
| negative Regulation: | FOXC2    | ---- | chemosensitivity | 27336949 | 10.1159/000445620            |
| negative Regulation: | CD81     | ---- | chemosensitivity | 32926125 | 10.1182/bloodadvances.20200  |
| negative Regulation: | CD81     | ---- | chemosensitivity | 32926125 | 10.1182/bloodadvances.20200  |
| negative Regulation: | MIR1260B | ---- | chemosensitivity | 31081086 | 10.26355/eurrev_201904_1769  |
| negative Regulation: | MIR1260B | ---- | chemosensitivity | 30250581 | 10.3892/ol.2018.930710.3892  |
| negative Regulation: | IGFBP2   | ---- | chemosensitivity | 29344663 | 10.3892/mmr.2018.8434        |
| negative Regulation: | IGFBP2   | ---- | chemosensitivity | 29344663 | 10.3892/mmr.2018.8434        |
| negative Regulation: | IGFBP2   | ---- | chemosensitivity | 34225729 | 10.1186/s12935-021-02040-5   |
| negative Regulation: | IGFBP2   | ---- | chemosensitivity | 23515291 | 10.1210/en.2012-1970         |
| negative Regulation: | IGFBP2   | ---- | chemosensitivity | 23515291 | 10.1210/en.2012-1970         |
| negative Regulation: | IGFBP2   | ---- | chemosensitivity | 25093489 | 10.1038/bjc.2014.435         |
| negative Regulation: | IGFBP2   | ---- | chemosensitivity | 25093489 | 10.1038/bjc.2014.435         |
| negative Regulation: | IGFBP2   | ---- | chemosensitivity | 25093489 | 10.1038/bjc.2014.435         |
| negative Regulation: | IGFBP2   | ---- | chemosensitivity | 31903164 | 10.18632/oncotarget.2735510  |
| negative Regulation: | INSR     | ---- | chemosensitivity | 31230061 | 10.12659/MSM.915503          |
| negative Regulation: | NHEJ1    | ---- | chemosensitivity | 28526069 | 10.1186/s12885-017-3345-y    |
| negative Regulation: | GLI1     | ---- | chemosensitivity | 31474360 | 10.1016/j.trecan.2019.07.00  |
| negative Regulation: | GLI1     | ---- | chemosensitivity | 33743723 | 10.1186/s12967-021-02789-3   |
| negative Regulation: | GLI1     | ---- | chemosensitivity | 33743723 | 10.1186/s12967-021-02789-3   |
| negative Regulation: | GLI1     | ---- | chemosensitivity | 27008269 | 10.1159/000443075            |
| negative Regulation: | KIF4A    | ---- | chemosensitivity | 36217900 | 10.1111/cbdd.14153           |
| negative Regulation: | FUT8     | ---- | chemosensitivity | 33571582 | 10.1016/j.bbagen.2021.12987  |
| negative Regulation: | FUT8     | ---- | chemosensitivity | 24232099 | 10.1038/cddis.2013.450       |
| negative Regulation: | FUT8     | ---- | chemosensitivity | 24232099 | 10.1038/cddis.2013.450       |
| negative Regulation: | FUT8     | ---- | chemosensitivity | 33571582 | 10.1016/j.bbagen.2021.12987  |
| negative Regulation: | PARP1    | ---- | chemosensitivity | 32360576 | 10.1016/j.addr.2020.04.010   |
| negative Regulation: | PARP1    | ---- | chemosensitivity | 30466996 | 10.1016/j.phymed.2018.09.01  |
| negative Regulation: | PARP1    | ---- | chemosensitivity | 21093979 | 10.1016/j.canlet.2010.10.02  |
| negative Regulation: | PARP1    | ---- | chemosensitivity | 19229243 |                              |
| negative Regulation: | PARP1    | ---- | chemosensitivity | 22204321 | 10.2174/138945012799201711   |
| negative Regulation: | PARP1    | ---- | chemosensitivity | 21270666 | 10.1097/JTO.0b013e31820c9e3  |
| negative Regulation: | PARP1    | ---- | chemosensitivity | 18440222 | 10.1016/j.ejca.2008.03.0191  |
| negative Regulation: | PARP1    | ---- | chemosensitivity | 28916446 | 10.1016/j.jconrel.2017.09.00 |
| negative Regulation: | PARP1    | ---- | chemosensitivity | 33363619 | 10.3892/ol.2020.1234310.389  |
| negative Regulation: | PARP1    | ---- | chemosensitivity | 35130631 | 10.3724/abbs.202101110.3724  |
| negative Regulation: | PARP1    | ---- | chemosensitivity | 35130631 | 10.3724/abbs.202101110.3724  |
| negative Regulation: | MVP      | ---- | chemosensitivity | 23974068 | 10.1016/j.drudis.2013.08.00  |
| negative Regulation: | MVP      | ---- | chemosensitivity |          |                              |
| negative Regulation: | RALBP1   | ---- | chemosensitivity | 26125275 |                              |
| negative Regulation: | RALBP1   | ---- | chemosensitivity | 23292182 | 10.1007/s11060-013-1045-2    |
| negative Regulation: | RALBP1   | ---- | chemosensitivity | 24839008 | 10.1007/s13277-014-2073-z    |
| negative Regulation: | RALBP1   | ---- | chemosensitivity | 24839008 | 10.1007/s13277-014-2073-z    |
| negative Regulation: | RALBP1   | ---- | chemosensitivity | 24839008 | 10.1007/s13277-014-2073-z    |
| negative Regulation: | RALBP1   | ---- | chemosensitivity | 27473470 | 10.1007/s10571-016-0410-z10  |
| negative Regulation: | RALBP1   | ---- | chemosensitivity | 23292182 | 10.1007/s11060-013-1045-210  |
| negative Regulation: | RALBP1   | ---- | chemosensitivity |          |                              |
| negative Regulation: | OLFM4    | ---- | chemosensitivity | 34974280 | 10.1016/j.tranon.2021.10133  |
| negative Regulation: | OLFM4    | ---- | chemosensitivity | 34974280 | 10.1016/j.tranon.2021.10133  |
| negative Regulation: | CDC25C   | ---- | chemosensitivity | 28487115 | 10.1016/j.ymthe.2017.04.016  |
| negative Regulation: | EDN1     | ---- | chemosensitivity | 28013061 | 10.1016/j.resp.2016.12.005   |
| negative Regulation: | EDN1     | ---- | chemosensitivity | 24184161 | 10.1016/j.bbamcr.2013.10.01  |
| negative Regulation: | EDN1     | ---- | chemosensitivity | 24184161 | 10.1016/j.bbamcr.2013.10.01  |
| negative Regulation: | EDN1     | ---- | chemosensitivity | 24468467 | 10.1016/j.resp.2014.01.015   |

|          |             |            |     |                  |          |                             |
|----------|-------------|------------|-----|------------------|----------|-----------------------------|
| negative | Regulation: | TLR8       | --- | chemosensitivity | 26134824 | 10.3892/ijo.2015.3069       |
| negative | Regulation: | RNF13      | --- | chemosensitivity | 36551703 | 10.3390/cancers14246218     |
| negative | Regulation: | RNF13      | --- | chemosensitivity | 36551703 | 10.3390/cancers14246218     |
| negative | Regulation: | TBL1X      | --- | chemosensitivity | 26070712 | 10.15252/emmm.20140483710.1 |
| negative | Regulation: | NR2F1-AS1  | --- | chemosensitivity | 31651347 | 10.1186/s12943-019-1086-z   |
| negative | Regulation: | PTK2       | --- | chemosensitivity | 32446364 | 10.1016/j.bbrc.2020.04.107  |
| negative | Regulation: | PTK2       | --- | chemosensitivity | 33038490 | 10.1016/j.canlet.2020.10.00 |
| negative | Regulation: | PTK2       | --- | chemosensitivity | 21176958 | 10.1016/j.leukres.2010.12.0 |
| negative | Regulation: | PTK2       | --- | chemosensitivity | 25316657 | 10.1016/j.pharmthera.2014.1 |
| negative | Regulation: | PTK2       | --- | chemosensitivity | 20021699 |                             |
| negative | Regulation: | PTK2       | --- | chemosensitivity | 20021699 |                             |
| negative | Regulation: | PTK2       | --- | chemosensitivity | 31236120 | 10.1186/s11658-019-0169-6   |
| negative | Regulation: | PTK2       | --- | chemosensitivity | 29984656 | 10.2174/1568009618666180706 |
| negative | Regulation: | PTK2       | --- | chemosensitivity | 32872257 | 10.3390/ijms21176234        |
| negative | Regulation: | PTK2       | --- | chemosensitivity | 20021699 | 10.1186/1476-4598-8-12510.1 |
| negative | Regulation: | PTK2       | --- | chemosensitivity | 24062525 | 10.1093/jnci/djt21010.1093/ |
| negative | Regulation: | PTK2       | --- | chemosensitivity | 26631041 | 10.1007/s13277-015-4528-210 |
| negative | Regulation: | PTK2       | --- | chemosensitivity | 31969973 | 10.1016/j.csbj.2019.12.0101 |
| negative | Regulation: | PTK2       | --- | chemosensitivity | 35163650 | 10.3390/ijms23031726        |
| negative | Regulation: | PTK2       | --- | chemosensitivity | 35350066 | 10.1158/0008-5472.CAN-20-38 |
| negative | Regulation: | PTK2       | --- | chemosensitivity | 35820889 | 10.1186/s12885-022-09799-4  |
| negative | Regulation: | ZNF649-AS1 | --- | chemosensitivity | 32735773 | 10.1016/j.ymthe.2020.07.019 |
| negative | Regulation: | ZNF649-AS1 | --- | chemosensitivity | 32735773 | 10.1016/j.ymthe.2020.07.019 |
| negative | Regulation: | ZNF649-AS1 | --- | chemosensitivity | 32735773 | 10.1016/j.ymthe.2020.07.019 |
| negative | Regulation: | ZNF649-AS1 | --- | chemosensitivity | 32735773 | 10.1016/j.ymthe.2020.07.019 |
| negative | Regulation: | LINC02883  | --- | chemosensitivity | 31850704 | 10.7754/Clin.Lab.2019.19053 |
| negative | Regulation: | LINC02883  | --- | chemosensitivity | 31850704 | 10.7754/Clin.Lab.2019.19053 |
| negative | Regulation: | LINC02883  | --- | chemosensitivity | 31850704 | 10.7754/Clin.Lab.2019.19053 |
| negative | Regulation: | LINC02883  | --- | chemosensitivity | 31850704 | 10.7754/Clin.Lab.2019.19053 |
| negative | Regulation: | METTL1     | --- | chemosensitivity | 31866582 | 10.18632/aging.10257510.186 |
| negative | Regulation: | METTL1     | --- | chemosensitivity | 35217794 | 10.1038/s41388-022-02250-9  |
| negative | Regulation: | METTL1     | --- | chemosensitivity | 35217794 | 10.1038/s41388-022-02250-9  |
| negative | Regulation: | METTL1     | --- | chemosensitivity | 35217794 | 10.1038/s41388-022-02250-9  |
| negative | Regulation: | METTL1     | --- | chemosensitivity | 35217794 | 10.1038/s41388-022-02250-9  |
| negative | Regulation: | METTL1     | --- | chemosensitivity | 35217794 | 10.1038/s41388-022-02250-9  |
| negative | Regulation: | TAOK3      | --- | chemosensitivity | 33087151 | 10.1186/s12964-020-00600-2  |
| negative | Regulation: | NODAL      | --- | chemosensitivity | 30699065 | 10.1515/hsz-2018-0392       |
| negative | Regulation: | NODAL      | --- | chemosensitivity | 30699065 | 10.1515/hsz-2018-0392       |
| negative | Regulation: | NODAL      | --- | chemosensitivity | 30699065 | 10.1515/hsz-2018-0392       |
| negative | Regulation: | NODAL      | --- | chemosensitivity | 21532621 | 10.1038/onc.2011.127        |
| negative | Regulation: | PTN        | --- | chemosensitivity | 30497491 | 10.1186/s12964-018-0304-4   |
| negative | Regulation: | PTN        | --- | chemosensitivity | 28969035 | 10.18632/oncotarget.1914810 |
| negative | Regulation: | PTN        | --- | chemosensitivity |          | 10.1186/s12964-018-0304-4   |
| negative | Regulation: | ST8SIA1    | --- | chemosensitivity | 34577144 | 10.3390/molecules26185673   |
| negative | Regulation: | METAP2     | --- | chemosensitivity | 30880771 | 10.4103/jcrt.JCRT_250_1710. |
| negative | Regulation: | DOT1L      | --- | chemosensitivity | 26111464 | 10.1053/j.seminhematol.2015 |
| negative | Regulation: | USP35      | --- | chemosensitivity | 35022505 | 10.1038/s41374-021-00725-z  |
| negative | Regulation: | NOTCH1     | --- | chemosensitivity | 26302232 | 10.1016/j.biomaterials.2015 |
| negative | Regulation: | NOTCH1     | --- | chemosensitivity | 30336197 | 10.1016/j.canlet.2018.09.03 |
| negative | Regulation: | NOTCH1     | --- | chemosensitivity | 30497876 | 10.1016/j.prp.2018.10.013   |
| negative | Regulation: | NOTCH1     | --- | chemosensitivity | 29879503 | 10.1016/j.gene.2018.06.005  |
| negative | Regulation: | NOTCH1     | --- | chemosensitivity | 31545250 | 10.1016/j.biopha.2019.10930 |
| negative | Regulation: | NOTCH1     | --- | chemosensitivity | 29723707 | 10.1016/j.dnarep.2018.04.00 |
| negative | Regulation: | NOTCH1     | --- | chemosensitivity | 27727250 | 10.1038/mtna.2016.82        |

|          |             |         |     |                  |          |                              |
|----------|-------------|---------|-----|------------------|----------|------------------------------|
| negative | Regulation: | NOTCH1  | --- | chemosensitivity | 21420785 | 10.1016/j.canlet.2011.02.03  |
| negative | Regulation: | NOTCH1  | --- | chemosensitivity | 20600632 | 10.1016/j.bbcan.2010.06.001  |
| negative | Regulation: | NOTCH1  | --- | chemosensitivity | 23500524 | 10.1016/j.biocel.2013.02.02  |
| negative | Regulation: | NOTCH1  | --- | chemosensitivity | 23500524 | 10.1016/j.biocel.2013.02.02  |
| negative | Regulation: | NOTCH1  | --- | chemosensitivity | 23810012 | 10.1016/B978-0-12-416673-8.  |
| negative | Regulation: | NOTCH1  | --- | chemosensitivity | 28914645 | 10.1097/CCO.0000000000000040 |
| negative | Regulation: | NOTCH1  | --- | chemosensitivity | 32228202 | 10.1177/0300060520904847     |
| negative | Regulation: | NOTCH1  | --- | chemosensitivity | 32913140 | 10.1124/MOLPHARM.120.000006  |
| negative | Regulation: | NOTCH1  | --- | chemosensitivity | 32913140 | 10.1124/MOLPHARM.120.000006  |
| negative | Regulation: | NOTCH1  | --- | chemosensitivity | 24451948 | 10.3760/cma.j.issn.0366-699  |
| negative | Regulation: | NOTCH1  | --- | chemosensitivity | 24451948 | 10.3760/cma.j.issn.0366-699  |
| negative | Regulation: | NOTCH1  | --- | chemosensitivity | 26927514 | 10.1038/labinvest.2015.163   |
| negative | Regulation: | NOTCH1  | --- | chemosensitivity | 19550121 |                              |
| negative | Regulation: | NOTCH1  | --- | chemosensitivity | 20204271 | 10.3892/or_00000712          |
| negative | Regulation: | NOTCH1  | --- | chemosensitivity | 20204271 | 10.3892/or_00000712          |
| negative | Regulation: | NOTCH1  | --- | chemosensitivity | 23568245 | 10.1007/s00268-013-2010-010  |
| negative | Regulation: | NOTCH1  | --- | chemosensitivity | 24316112 | 10.1016/j.arcmed.2013.10.00  |
| negative | Regulation: | NOTCH1  | --- | chemosensitivity | 24782036 | 10.1007/s11010-014-2069-410  |
| negative | Regulation: | NOTCH1  | --- | chemosensitivity | 24802328 | 10.1007/s12032-014-0972-x10  |
| negative | Regulation: | NOTCH1  | --- | chemosensitivity | 31545250 | 10.1016/j.biopha.2019.10930  |
| negative | Regulation: | NOTCH1  | --- | chemosensitivity | 1150     | 10.1016/j.prp.2018.10.013    |
| negative | Regulation: | NOTCH1  | --- | chemosensitivity |          | 10.1097/CCO.0000000000000040 |
| negative | Regulation: | NOTCH1  | --- | chemosensitivity |          | 10.2298/ABS210423030R        |
| negative | Regulation: | NOTCH1  | --- | chemosensitivity | 33882814 | 10.2174/1871530321666210421  |
| negative | Regulation: | SLC34A2 | --- | chemosensitivity | 30592329 | 10.1002/jcb.2830510.1002/jc  |
| negative | Regulation: | PLA2G4A | --- | chemosensitivity | 30829552 | 10.1080/15384047.2019.15799  |
| negative | Regulation: | PLA2G4A | --- | chemosensitivity | 30829552 | 10.1080/15384047.2019.15799  |
| negative | Regulation: | PLA2G4A | --- | chemosensitivity | 30829552 | 10.1080/15384047.2019.15799  |
| negative | Regulation: | PLA2G4A | --- | chemosensitivity | 30829552 | 10.1080/15384047.2019.15799  |
| negative | Regulation: | PLA2G4A | --- | chemosensitivity | 30829552 | 10.1080/15384047.2019.15799  |
| negative | Regulation: | PLA2G4A | --- | chemosensitivity | 30829552 | 10.1080/15384047.2019.15799  |
| negative | Regulation: | PLA2G4A | --- | chemosensitivity | 30829552 | 10.1080/15384047.2019.15799  |
| negative | Regulation: | RELN    | --- | chemosensitivity | 32764530 | 10.12659/MSM.925298          |
| negative | Regulation: | RELN    | --- | chemosensitivity | 32764530 | 10.12659/MSM.92529810.12659  |
| negative | Regulation: | PRKCA   | --- | chemosensitivity | 32203165 | 10.1038/s41388-020-1261-0    |
| negative | Regulation: | BCL2L1  | --- | chemosensitivity | 15611130 | 10.1074/jbc.M409906200       |
| negative | Regulation: | BCL2L1  | --- | chemosensitivity | 31102887 | 10.1016/j.phymed.2019.15294  |
| negative | Regulation: | BCL2L1  | --- | chemosensitivity |          | 10.1016/S1525-0016(16)41190  |
| negative | Regulation: | BCL2L1  | --- | chemosensitivity | 11458048 | 10.1016/S0022-5347(05)65964  |
| negative | Regulation: | BCL2L1  | --- | chemosensitivity | 21277008 | 10.1016/j.acthis.2011.01.00  |
| negative | Regulation: | BCL2L1  | --- | chemosensitivity | 15327837 | 10.1016/j.canlet.2004.03.04  |
| negative | Regulation: | BCL2L1  | --- | chemosensitivity | 18840529 | 10.1016/j.phrs.2008.09.005   |
| negative | Regulation: | BCL2L1  | --- | chemosensitivity | 16280040 |                              |
| negative | Regulation: | BCL2L1  | --- | chemosensitivity | 15611130 |                              |
| negative | Regulation: | BCL2L1  | --- | chemosensitivity | 17353918 |                              |
| negative | Regulation: | BCL2L1  | --- | chemosensitivity | 31810474 | 10.1186/s13048-019-0588-z    |
| negative | Regulation: | BCL2L1  | --- | chemosensitivity | 22664653 | 10.3892/ijmm.2012.1013       |
| negative | Regulation: | BCL2L1  | --- | chemosensitivity | 22664653 | 10.3892/ijmm.2012.1013       |
| negative | Regulation: | BCL2L1  | --- | chemosensitivity | 23171055 | 10.1186/1471-2407-12-541     |
| negative | Regulation: | BCL2L1  | --- | chemosensitivity | 23666471 | 10.1097/CCO.0b013e3283622c1  |
| negative | Regulation: | BCL2L1  | --- | chemosensitivity | 24173654 | 10.3892/or.2013.2817         |
| negative | Regulation: | BCL2L1  | --- | chemosensitivity | 16080514 |                              |
| negative | Regulation: | BCL2L1  | --- | chemosensitivity | 17224645 | 10.4161/cbt.6.2.3626         |
| negative | Regulation: | BCL2L1  | --- | chemosensitivity | 34678222 | 10.1016/j.bcp.2021.114801    |

|          |             |          |     |                  |          |                             |
|----------|-------------|----------|-----|------------------|----------|-----------------------------|
| negative | Regulation: | PRMT5    | --- | chemosensitivity | 31665911 | 10.1177/0963689719885083    |
| negative | Regulation: | PRMT5    | --- | chemosensitivity | 31665911 | 10.1177/0963689719885083    |
| negative | Regulation: | PRMT5    | --- | chemosensitivity | 31665911 | 10.1177/0963689719885083    |
| negative | Regulation: | PRMT5    | --- | chemosensitivity | 32766778 | 10.1042/CS20200680          |
| negative | Regulation: | PRMT5    | --- | chemosensitivity | 31665911 | 10.1177/096368971988508310. |
| negative | Regulation: | CYBA     | --- | chemosensitivity | 30800222 | 10.18632/oncotarget.2663710 |
| negative | Regulation: | CYBA     | --- | chemosensitivity | 34093828 | 10.7150/jca.5416310.7150/jc |
| negative | Regulation: | ANK2     | --- | chemosensitivity | 18441325 |                             |
| negative | Regulation: | ANK2     | --- | chemosensitivity | 18441325 | 10.1074/jbc.M80010920010.10 |
| negative | Regulation: | CX3CL1   | --- | chemosensitivity | 35294039 | 10.3892/ijo.2022.5337       |
| negative | Regulation: | CX3CL1   | --- | chemosensitivity | 35294039 | 10.3892/ijo.2022.5337       |
| negative | Regulation: | MYH9     | --- | chemosensitivity | 33220257 | 10.1016/j.yexcr.2020.112387 |
| negative | Regulation: | HMGB1    | --- | chemosensitivity | 32553931 | 10.1016/j.lfs.2020.117967   |
| negative | Regulation: | HMGB1    | --- | chemosensitivity | 33035835 | 10.1016/j.biopha.2020.11079 |
| negative | Regulation: | HMGB1    | --- | chemosensitivity | 30612957 | 10.1016/j.redox.2018.101084 |
| negative | Regulation: | HMGB1    | --- | chemosensitivity | 32388677 | 10.1007/s00262-020-02598-5  |
| negative | Regulation: | HMGB1    | --- | chemosensitivity | 24418846 | 10.4161/auto.27418          |
| negative | Regulation: | HMGB1    | --- | chemosensitivity | 25101674 | 10.1038/cddis.2014.300      |
| negative | Regulation: | HMGB1    | --- | chemosensitivity | 25101674 | 10.1038/cddis.2014.300      |
| negative | Regulation: | HMGB1    | --- | chemosensitivity | 25101674 | 10.1038/cddis.2014.300      |
| negative | Regulation: | HMGB1    | --- | chemosensitivity | 26397184 | 10.3892/or.2015.4278        |
| negative | Regulation: | HMGB1    | --- | chemosensitivity | 24418846 | 10.4161/auto.2741810.4161/a |
| negative | Regulation: | HMGB1    | --- | chemosensitivity | 26397184 | 10.3892/or.2015.427810.3892 |
| negative | Regulation: | HMGB1    | --- | chemosensitivity | 28885675 | 10.5301/tj.500065610.5301/t |
| negative | Regulation: | HMGB1    | --- | chemosensitivity | 30154286 | 10.11817/j.issn.1672-7347.2 |
| negative | Regulation: | HMGB1    | --- | chemosensitivity | 31664305 | 10.1590/1414-431X2019865710 |
| negative | Regulation: | HMGB1    | --- | chemosensitivity |          | 10.4161/auto.27418          |
| negative | Regulation: | HMGB1    | --- | chemosensitivity | 25934464 | 10.1016/j.thromres.2015.03. |
| negative | Regulation: | HMGB1    | --- | chemosensitivity |          |                             |
| negative | Regulation: | HMGB1    | --- | chemosensitivity | 35193644 | 10.1186/s13046-022-02291-81 |
| negative | Regulation: | HMGB1    | --- | chemosensitivity | 35193644 | 10.1186/s13046-022-02291-8  |
| negative | Regulation: | HMGB1    | --- | chemosensitivity | 35193644 | 10.1186/s13046-022-02291-8  |
| negative | Regulation: | HMGB1    | --- | chemosensitivity | 35193644 | 10.1186/s13046-022-02291-8  |
| negative | Regulation: | PDRG1    | --- | chemosensitivity | 31882431 |                             |
| negative | Regulation: | CLN3     | --- | chemosensitivity | 26299671 | 10.3892/mmr.2015.4238       |
| negative | Regulation: | CLN3     | --- | chemosensitivity | 26299671 | 10.3892/mmr.2015.4238       |
| negative | Regulation: | PRKDC    | --- | chemosensitivity | 24530422 | 10.1016/j.bbagrm.2014.02.00 |
| negative | Regulation: | PRKDC    | --- | chemosensitivity | 28498431 | 10.3892/or.2017.5634        |
| negative | Regulation: | PRKDC    | --- | chemosensitivity | 28498431 | 10.3892/or.2017.5634        |
| negative | Regulation: | PRKDC    | --- | chemosensitivity | 32661323 | 10.1038/s41388-020-1384-3   |
| negative | Regulation: | PRKDC    | --- | chemosensitivity | 26065416 | 10.1371/journal.pone.012794 |
| negative | Regulation: | PRKDC    | --- | chemosensitivity | 26065416 | 10.1371/journal.pone.012794 |
| negative | Regulation: | PRKDC    | --- | chemosensitivity | 14532987 | 10.3892/ijo.23.5.1431       |
| negative | Regulation: | PRKDC    | --- | chemosensitivity | 27487130 | 10.18632/oncotarget.1086410 |
| negative | Regulation: | PRKDC    | --- | chemosensitivity | 28498431 | 10.3892/or.2017.563410.3892 |
| negative | Regulation: | PRKDC    | --- | chemosensitivity | 31255330 | 10.1016/j.prp.2019.15250910 |
| negative | Regulation: | MIR124-3 | --- | chemosensitivity | 31708690 | 10.1186/s12935-019-1004-x   |
| negative | Regulation: | MIR492   | --- | chemosensitivity | 32065219 | 10.1042/BSR20194342         |
| negative | Regulation: | MIR629   | --- | chemosensitivity | 31257454 | 10.3892/ijmm.2019.4245      |
| negative | Regulation: | ATF4     | --- | chemosensitivity | 33782384 | 10.1038/s41419-021-03574-2  |
| negative | Regulation: | AK6      | --- | chemosensitivity | 32774758 |                             |
| negative | Regulation: | RB1      | --- | chemosensitivity | 20594292 |                             |
| negative | Regulation: | RB1      | --- | chemosensitivity | 18782450 |                             |
| negative | Regulation: | RB1      | --- | chemosensitivity | 9342368  |                             |

|                                                      |                                      |
|------------------------------------------------------|--------------------------------------|
| negative Regulation: RB1 ---  chemosensitivity       | 9342368                              |
| negative Regulation: RB1 ---  chemosensitivity       | 11521194                             |
| negative Regulation: RB1 ---  chemosensitivity       | 28551632 10.21873/anticanres.11648   |
| negative Regulation: RB1 ---  chemosensitivity       | 20594292 10.1186/1476-4598-9-173     |
| negative Regulation: RB1 ---  chemosensitivity       | 24987858 10.1371/journal.pone.010095 |
| negative Regulation: RB1 ---  chemosensitivity       | 17640669 10.1016/j.jss.2007.03.038   |
| negative Regulation: RB1 ---  chemosensitivity       | 17640669 10.1016/j.jss.2007.03.038   |
| negative Regulation: RB1 ---  chemosensitivity       | 18332869 10.1038/onc.2008.4310.1038/ |
| negative Regulation: RB1 ---  chemosensitivity       | 34214844 10.1016/j.prp.2021.15353210 |
| negative Regulation: HRAS ---  chemosensitivity      | 25189269 10.3892/or.2014.3466        |
| negative Regulation: HRAS ---  chemosensitivity      | 25189269 10.3892/or.2014.3466        |
| negative Regulation: HRAS ---  chemosensitivity      | 25189269 10.3892/or.2014.346610.3892 |
| negative Regulation: SPP1 ---  chemosensitivity      | 28433634 10.1016/j.bbrc.2017.04.100  |
| negative Regulation: SPP1 ---  chemosensitivity      | 30535434 10.3892/ijo.2018.4656       |
| negative Regulation: SPP1 ---  chemosensitivity      | 21539449 10.1089/cbr.2010.0838       |
| negative Regulation: SPP1 ---  chemosensitivity      | 30627777 10.1007/s00280-018-3759-510 |
| negative Regulation: SPP1 ---  chemosensitivity      |                                      |
| negative Regulation: IL6 ---  chemosensitivity       | 22609487 10.1016/j.cca.2012.05.009   |
| negative Regulation: IL6 ---  chemosensitivity       | 23298711 10.1016/j.ejca.2012.12.002  |
| negative Regulation: IL6 ---  chemosensitivity       | 27725789 10.1155/2016/5894347        |
| negative Regulation: IL6 ---  chemosensitivity       | 26923327 10.1038/onc.2016.34         |
| negative Regulation: IL6 ---  chemosensitivity       | 29693201 10.1007/s00280-018-3584-x   |
| negative Regulation: IL6 ---  chemosensitivity       | 10.1007/978-3-030-20301-6_9          |
| negative Regulation: IL6 ---  chemosensitivity       | 15894559 10.1152/ajplung.00033.2005  |
| negative Regulation: IL6 ---  chemosensitivity       | 31714645 10.1002/jbt.2241210.1002/jb |
| negative Regulation: IL6 ---  chemosensitivity       | 32933994 10.1158/1078-0432.CCR-19-27 |
| negative Regulation: IL6 ---  chemosensitivity       | 33135338 10.1002/ctm2.21710.1002/ctr |
| negative Regulation: IL6 ---  chemosensitivity       | 33742970 10.1515/hsz-2020-034510.151 |
| negative Regulation: IL6 ---  chemosensitivity       | 33742970 10.1515/hsz-2020-0345       |
| negative Regulation: IL6 ---  chemosensitivity       | 33742970 10.1515/hsz-2020-0345       |
| negative Regulation: TGFB1 ---  chemosensitivity     | 23298711 10.1016/j.ejca.2012.12.002  |
| negative Regulation: TGFB1 ---  chemosensitivity     | 29204827 10.1007/978-3-319-69194-7_3 |
| negative Regulation: TGFB1 ---  chemosensitivity     | 10.1186/s40659-018-0205-4            |
| negative Regulation: TGFB1 ---  chemosensitivity     | 10.1186/s40659-018-0205-4            |
| negative Regulation: TGFB1 ---  chemosensitivity     | 10.1186/s40659-018-0205-4            |
| negative Regulation: TGFB1 ---  chemosensitivity     | 31127087 10.1038/s41419-019-1597-y   |
| negative Regulation: TGFB1 ---  chemosensitivity     | 31087138 10.1007/s00280-019-03866-7  |
| negative Regulation: TGFB1 ---  chemosensitivity     | 30594239 10.1186/s40659-018-0205-410 |
| negative Regulation: TGFB1 ---  chemosensitivity     | 30594239 10.1186/s40659-018-0205-410 |
| negative Regulation: TGFB1 ---  chemosensitivity     | 30594239 10.1186/s40659-018-0205-410 |
| negative Regulation: TGFB1 ---  chemosensitivity     | 28918673 10.1080/21691401.2017.13742 |
| negative Regulation: TGFB1 ---  chemosensitivity     | 31814893                             |
| negative Regulation: WEE1 ---  chemosensitivity      | 25965828 10.18632/oncotarget.3865    |
| negative Regulation: WEE1 ---  chemosensitivity      | 31387179 10.1016/j.biopha.2019.10918 |
| negative Regulation: MIR543 ---  chemosensitivity    | 34347977 10.1615/CritRevEukaryotGene |
| negative Regulation: CDC42 ---  chemosensitivity     | 32532057 10.3390/cancers1206152110.3 |
| negative Regulation: POU5F1 ---  chemosensitivity    | 23872274 10.1016/j.canlet.2013.07.00 |
| negative Regulation: POU5F1 ---  chemosensitivity    | 33650661 10.3892/or.2021.7925        |
| negative Regulation: POU5F1 ---  chemosensitivity    | 22732500 10.4161/cc.21021            |
| negative Regulation: POU5F1 ---  chemosensitivity    | 26260289 10.1186/s12943-015-0417-y   |
| negative Regulation: POU5F1 ---  chemosensitivity    | 26398480 10.3892/or.2015.4286        |
| negative Regulation: POU5F1 ---  chemosensitivity    |                                      |
| negative Regulation: POU5F1 ---  chemosensitivity    | 10.3892/or.2021.7925                 |
| negative Regulation: LINC01270 ---  chemosensitivity | 33199829 10.1038/s41417-020-00232-11 |

|                      |           |     |                  |          |                             |
|----------------------|-----------|-----|------------------|----------|-----------------------------|
| negative Regulation: | LINC01270 | --- | chemosensitivity | 35277667 | 10.1038/s41417-022-00439-4  |
| negative Regulation: | MIR630    | --- | chemosensitivity | 29452092 | 10.1016/j.bbrc.2018.02.062  |
| negative Regulation: | MIR630    | --- | chemosensitivity | 29949157 | 10.26355/eurrev-201806-1526 |
| negative Regulation: | MIR630    | --- | chemosensitivity | 26345808 | 10.4238/2015.July.31.25     |
| negative Regulation: | MIR630    | --- | chemosensitivity | 26345808 | 10.4238/2015.July.31.25     |
| negative Regulation: | MIR630    | --- | chemosensitivity | 26345808 | 10.4238/2015.July.31.25     |
| negative Regulation: | MIR630    | --- | chemosensitivity | 26345808 | 10.4238/2015.July.31.25     |
| negative Regulation: | MIR630    | --- | chemosensitivity | 26345808 | 10.4238/2015.July.31.2510.4 |
| negative Regulation: | MIR630    | --- | chemosensitivity | 26345808 | 10.4238/2015.July.31.2510.4 |
| negative Regulation: | MIR630    | --- | chemosensitivity | 26345808 | 10.4238/2015.July.31.2510.4 |
| negative Regulation: | IDH2      | --- | chemosensitivity | 36637036 | 10.15252/embj.2022110620    |
| negative Regulation: | UBQLN1    | --- | chemosensitivity | 34528694 | 10.3892/or.2021.818710.3892 |
| negative Regulation: | NR5A2     | --- | chemosensitivity | 29545602 | 10.1038/s41388-018-0193-4   |
| negative Regulation: | NR5A2     | --- | chemosensitivity | 29545602 | 10.1038/s41388-018-0193-4   |
| negative Regulation: | ESRRA     | --- | chemosensitivity | 35918761 | 10.1186/s12967-022-03549-7  |
| negative Regulation: | ALDH1A3   | --- | chemosensitivity | 30865894 | 10.1016/j.celrep.2019.02.03 |
| negative Regulation: | ALDH1A3   | --- | chemosensitivity | 32270866 | 10.1042/BSR20200390         |
| negative Regulation: | ALDH1A3   | --- | chemosensitivity |          | 10.1042/BSR20200390         |
| negative Regulation: | MST1R     | --- | chemosensitivity | 27035413 | 10.3892/or.2016.4721        |
| negative Regulation: | MST1R     | --- | chemosensitivity | 27035413 | 10.3892/or.2016.472110.3892 |
| negative Regulation: | TGM2      | --- | chemosensitivity | 30015899 | 10.3892/ijmm.2018.3753      |
| negative Regulation: | TGM2      | --- | chemosensitivity | 30015899 | 10.3892/ijmm.2018.3753      |
| negative Regulation: | TGM2      | --- | chemosensitivity | 30015899 | 10.3892/ijmm.2018.3753      |
| negative Regulation: | TGM2      | --- | chemosensitivity | 30015899 | 10.3892/ijmm.2018.3753      |
| negative Regulation: | TGM2      | --- | chemosensitivity | 30015899 | 10.3892/ijmm.2018.3753      |
| negative Regulation: | TGM2      | --- | chemosensitivity | 30015899 | 10.3892/ijmm.2018.3753      |
| negative Regulation: | TGM2      | --- | chemosensitivity | 30015899 | 10.3892/ijmm.2018.3753      |
| negative Regulation: | TGM2      | --- | chemosensitivity | 30015899 | 10.3892/ijmm.2018.3753      |
| negative Regulation: | TGM2      | --- | chemosensitivity | 30015899 | 10.3892/ijmm.2018.3753      |
| negative Regulation: | TGM2      | --- | chemosensitivity | 32572883 | 10.26355/eurrev_202006_2151 |
| negative Regulation: | TGM2      | --- | chemosensitivity | 32572883 | 10.26355/eurrev_202006_2151 |
| negative Regulation: | TGM2      | --- | chemosensitivity | 20596752 | 10.1007/s11060-010-0277-7   |
| negative Regulation: | TGM2      | --- | chemosensitivity | 16170020 | 10.1158/1535-7163.MCT-04-03 |
| negative Regulation: | TGM2      | --- | chemosensitivity | 26622499 | 10.3892/etm.2015.2679       |
| negative Regulation: | TGM2      | --- | chemosensitivity | 26622499 | 10.3892/etm.2015.2679       |
| negative Regulation: | TGM2      | --- | chemosensitivity | 30015899 | 10.3892/ijmm.2018.375310.38 |
| negative Regulation: | TGM2      | --- | chemosensitivity | 30015899 | 10.3892/ijmm.2018.375310.38 |
| negative Regulation: | TGM2      | --- | chemosensitivity | 34549308 | 10.3892/mmr.2021.12452      |
| negative Regulation: | TGM2      | --- | chemosensitivity | 34549308 | 10.3892/mmr.2021.12452      |
| negative Regulation: | SFRP5     | --- | chemosensitivity | 35269636 | 10.3390/ijms23052496        |
| negative Regulation: | KCNN1     | --- | chemosensitivity | 22833671 | 10.1074/jbc.M112.385765     |
| negative Regulation: | PDCD1     | --- | chemosensitivity | 33765543 | 10.1016/j.tranon.2021.10106 |
| negative Regulation: | PDCD1     | --- | chemosensitivity | 33710337 | 10.1182/bloodadvances.2020  |
| negative Regulation: | YBX1      | --- | chemosensitivity | 27044807 | 10.1016/j.biopha.2016.01.03 |
| negative Regulation: | YBX1      | --- | chemosensitivity | 27044807 | 10.1016/j.biopha.2016.01.03 |
| negative Regulation: | TIE1      | --- | chemosensitivity | 33812182 | 10.1016/j.ctarc.2021.100364 |
| negative Regulation: | PPBP      | --- | chemosensitivity | 25822018 | 10.1172/JCI78752            |
| negative Regulation: | PPBP      | --- | chemosensitivity | 25822018 | 10.1172/JCI78752            |
| negative Regulation: | PRKD1     | --- | chemosensitivity | 24665648 |                             |
| negative Regulation: | LINC00662 | --- | chemosensitivity | 30297104 | 10.1016/j.bbrc.2018.09.191  |
| negative Regulation: | LINC00662 | --- | chemosensitivity | 30297104 | 10.1016/j.bbrc.2018.09.1911 |
| negative Regulation: | DCLK1     | --- | chemosensitivity | 30119173 | 10.1016/j.biopha.2018.07.02 |
| negative Regulation: | DCLK1     | --- | chemosensitivity | 32533239 | 10.1007/s00424-020-02415-z  |
| negative Regulation: | DCLK1     | --- | chemosensitivity | 32533239 | 10.1007/s00424-020-02415-z  |



|                      |        |      |                  |          |                             |
|----------------------|--------|------|------------------|----------|-----------------------------|
| negative Regulation: | DCLK1  | ---  | chemosensitivity | 32533239 | 10.1007/s00424-020-02415-z1 |
| negative Regulation: | DCLK1  | ---  | chemosensitivity | 32533239 | 10.1007/s00424-020-02415-z1 |
| negative Regulation: | TSPAN9 | ---  | chemosensitivity | 31911756 | 10.1186/s12935-019-1089-2   |
| negative Regulation: | TSPAN9 | ---  | chemosensitivity | 31911756 | 10.1186/s12935-019-1089-210 |
| negative Regulation: | ROS1   | ---  | chemosensitivity | 27035628 | 10.3892/i.jo.2016.3452      |
| negative Regulation: | ROS1   | ---  | chemosensitivity | 27035628 | 10.3892/i.jo.2016.3452      |
| negative Regulation: | DAZL   | ---- | chemosensitivity | 32682409 | 10.1186/s12885-020-07155-y  |
| negative Regulation: | DNMT3A | ---  | chemosensitivity | 29115606 | 10.3892/mmr.2017.7923       |
| negative Regulation: | DNMT3A | ---  | chemosensitivity | 29115606 | 10.3892/mmr.2017.792310.389 |
| negative Regulation: | DNMT3A | ---  | chemosensitivity | 29115606 | 10.3892/mmr.2017.792310.389 |
| negative Regulation: | DNMT3A | ---- | chemosensitivity | 29115606 | 10.3892/mmr.2017.792310.389 |
| negative Regulation: | XIAP   | ---  | chemosensitivity | 15196850 | 10.1016/j.ygyno.2004.03.029 |
| negative Regulation: | XIAP   | ---  | chemosensitivity | 20647037 | 10.1016/j.bbcan.2010.07.004 |
| negative Regulation: | XIAP   | ---  | chemosensitivity | 17210228 | 10.1016/j.crv.2006.11.002   |
| negative Regulation: | XIAP   | ---  | chemosensitivity | 22627131 | 10.1016/j.bbrc.2012.05.066  |
| negative Regulation: | XIAP   | ---  | chemosensitivity | 25776486 | 10.1016/j.biopha.2014.12.04 |
| negative Regulation: | XIAP   | ---  | chemosensitivity | 19445670 |                             |
| negative Regulation: | XIAP   | ---  | chemosensitivity | 19904270 |                             |
| negative Regulation: | XIAP   | ---  | chemosensitivity | 16322751 |                             |
| negative Regulation: | XIAP   | ---  | chemosensitivity | 20676365 |                             |
| negative Regulation: | XIAP   | ---  | chemosensitivity | 23242307 | 10.3892/or.2012.2189        |
| negative Regulation: | XIAP   | ---  | chemosensitivity | 23354694 | 10.3892/or.2013.2246        |
| negative Regulation: | XIAP   | ---  | chemosensitivity | 23354694 | 10.3892/or.2013.2246        |
| negative Regulation: | XIAP   | ---  | chemosensitivity | 23354694 | 10.3892/or.2013.2246        |
| negative Regulation: | XIAP   | ---  | chemosensitivity | 23479728 | 10.1074/jbc.M112.436113     |
| negative Regulation: | XIAP   | ---  | chemosensitivity | 20676365 | 10.1371/journal.pone.001181 |
| negative Regulation: | XIAP   | ---  | chemosensitivity | 24330851 | 10.3727/096504013X137935557 |
| negative Regulation: | XIAP   | ---  | chemosensitivity | 24330851 | 10.3727/096504013X137935557 |
| negative Regulation: | XIAP   | ---  | chemosensitivity | 24853184 | 10.1038/bjc.2014.255        |
| negative Regulation: | XIAP   | ---  | chemosensitivity | 24839986 | 10.3892/or.2014.3200        |
| negative Regulation: | XIAP   | ---  | chemosensitivity | 25572427 | 10.3892/or.2014.3698        |
| negative Regulation: | XIAP   | ---  | chemosensitivity | 17127230 | 10.1179/joc.2006.18.5.525   |
| negative Regulation: | XIAP   | ---  | chemosensitivity | 17611394 |                             |
| negative Regulation: | XIAP   | ---  | chemosensitivity | 22736919 | 10.3748/wjg.v18.i23.295610. |
| negative Regulation: | XIAP   | ---  | chemosensitivity | 23591345 |                             |
| negative Regulation: | XIAP   | ---  | chemosensitivity | 25572427 | 10.3892/or.2014.369810.3892 |
| negative Regulation: | XIAP   | ---  | chemosensitivity | 29221164 | 10.18632/oncotarget.2132010 |
| negative Regulation: | XIAP   | ---  | chemosensitivity | 29221164 | 10.18632/oncotarget.2132010 |
| negative Regulation: | XIAP   | ---  | chemosensitivity | 29221164 | 10.18632/oncotarget.2132010 |
| negative Regulation: | XIAP   | ---  | chemosensitivity | 25707849 | 10.3892/mmr.2015.3380       |
| negative Regulation: | GHET1  | ---  | chemosensitivity | 32720600 | 10.2174/1389201021999200727 |
| negative Regulation: | RPN2   | ---  | chemosensitivity | 33087705 | 10.1038/s41419-020-03113-5  |
| negative Regulation: | RPN2   | ---  | chemosensitivity | 33087705 | 10.1038/s41419-020-03113-5  |
| negative Regulation: | RPN2   | ---  | chemosensitivity | 33087705 | 10.1038/s41419-020-03113-5  |
| negative Regulation: | RPN2   | ---  | chemosensitivity | 33087705 | 10.1038/s41419-020-03113-5  |
| negative Regulation: | PRL    | ---- | chemosensitivity | 28204229 | 10.1210/en.2016-1903        |
| negative Regulation: | PRL    | ---- | chemosensitivity | 28204229 | 10.1210/en.2016-1903        |
| negative Regulation: | PRL    | ---- | chemosensitivity | 28204229 | 10.1210/en.2016-1903        |
| negative Regulation: | PRL    | ---- | chemosensitivity | 28204229 | 10.1210/en.2016-190310.1210 |
| negative Regulation: | FOSL1  | ---- | chemosensitivity | 27685628 | 10.1038/cddis.2016.289      |
| negative Regulation: | FOSL1  | ---  | chemosensitivity | 22586064 | 10.1158/0008-5472.CAN-11-25 |
| negative Regulation: | FOSL1  | ---  | chemosensitivity | 27685628 | 10.1038/cddis.2016.28910.10 |
| negative Regulation: | AR     | ---  | chemosensitivity | 22851332 | 10.1007/s12020-012-9762-410 |
| negative Regulation: | FGFRL1 | ---  | chemosensitivity | 31957179 | 10.1111/jcmm.1476310.1111/j |

|                      |                              |          |                              |
|----------------------|------------------------------|----------|------------------------------|
| negative Regulation: | YY1 ---  chemosensitivity    |          | 10.1615/CritRevEukaryotGene  |
| negative Regulation: | TFAP2C ---  chemosensitivity | 29439714 | 10.1186/s13046-018-0683-9    |
| negative Regulation: | RAC1 ---  chemosensitivity   | 31787614 | 10.3324/haematol.2019.23134  |
| negative Regulation: | RAC1 ---  chemosensitivity   | 32193458 | 10.1038/s41467-020-15308-7   |
| negative Regulation: | RAC1 ---  chemosensitivity   | 32193458 | 10.1038/s41467-020-15308-7   |
| negative Regulation: | RAC1 ---  chemosensitivity   | 32193458 | 10.1038/s41467-020-15308-7   |
| negative Regulation: | RAC1 ---  chemosensitivity   | 32193458 | 10.1038/s41467-020-15308-7   |
| negative Regulation: | RAC1 ---  chemosensitivity   | 32193458 | 10.1038/s41467-020-15308-7   |
| negative Regulation: | RAC1 ---  chemosensitivity   | 33790078 | 10.1248/CPB.C20-00600        |
| negative Regulation: | RAC1 ---  chemosensitivity   | 21837360 | 10.3892/ijmm.2011.775        |
| negative Regulation: | RAC1 ---  chemosensitivity   | 23792636 | 10.4161/cbt.25091            |
| negative Regulation: | RAC1 ---  chemosensitivity   | 23760915 | 10.1177/0300060513479875     |
| negative Regulation: | RAC1 ---  chemosensitivity   | 23760915 | 10.1177/0300060513479875     |
| negative Regulation: | RAC1 ---  chemosensitivity   | 24441506 | 10.1097/CCO.0000000000000004 |
| negative Regulation: | RAC1 ---  chemosensitivity   | 21837360 | 10.3892/ijmm.2011.77510.389  |
| negative Regulation: | RAC1 ---  chemosensitivity   |          | 10.3324/haematol.2019.23134  |
| negative Regulation: | RAC1 ---  chemosensitivity   | 36599922 | 10.1038/s41388-022-02574-6   |
| negative Regulation: | RNPS1 ---  chemosensitivity  | 36300671 | 10.1002/iub.2686             |
| negative Regulation: | CTNNB1 ---  chemosensitivity | 31071331 | 10.1016/j.bcp.2019.05.001    |
| negative Regulation: | CTNNB1 ---  chemosensitivity | 30081068 | 10.1016/j.canlet.2018.07.04  |
| negative Regulation: | CTNNB1 ---  chemosensitivity | 32932156 | 10.1016/j.ctrv.2020.102103   |
| negative Regulation: | CTNNB1 ---  chemosensitivity | 32563150 | 10.1016/j.biopha.2020.11039  |
| negative Regulation: | CTNNB1 ---  chemosensitivity | 32268268 | 10.1016/j.ebiom.2020.102717  |
| negative Regulation: | CTNNB1 ---  chemosensitivity | 28870999 | 10.21873/cgp.20042           |
| negative Regulation: | CTNNB1 ---  chemosensitivity |          | 10.1007/s00280-018-3565-010  |
| negative Regulation: | CTNNB1 ---  chemosensitivity | 31323761 | 10.3390/ijms20143518         |
| negative Regulation: | CTNNB1 ---  chemosensitivity | 32814878 | 10.1038/s41418-020-00607-9   |
| negative Regulation: | CTNNB1 ---  chemosensitivity | 32814878 | 10.1038/s41418-020-00607-9   |
| negative Regulation: | CTNNB1 ---  chemosensitivity | 29228417 | 10.26355/eurrev_201711_1381  |
| negative Regulation: | CTNNB1 ---  chemosensitivity | 23747891 | 10.2741/4187                 |
| negative Regulation: | CTNNB1 ---  chemosensitivity | 21858114 | 10.1371/journal.pone.002342  |
| negative Regulation: | CTNNB1 ---  chemosensitivity | 21858114 | 10.1371/journal.pone.002342  |
| negative Regulation: | CTNNB1 ---  chemosensitivity | 23094073 | 10.1371/journal.pone.004764  |
| negative Regulation: | CTNNB1 ---  chemosensitivity | 23094073 | 10.1371/journal.pone.004764  |
| negative Regulation: | CTNNB1 ---  chemosensitivity | 25658419 | 10.1371/journal.pone.011709  |
| negative Regulation: | CTNNB1 ---  chemosensitivity | 26316041 | 10.3892/ijo.2015.3137        |
| negative Regulation: | CTNNB1 ---  chemosensitivity | 26316041 | 10.3892/ijo.2015.3137        |
| negative Regulation: | CTNNB1 ---  chemosensitivity | 26316041 | 10.3892/ijo.2015.3137        |
| negative Regulation: | CTNNB1 ---  chemosensitivity | 26316041 | 10.3892/ijo.2015.3137        |
| negative Regulation: | CTNNB1 ---  chemosensitivity | 26316041 | 10.3892/ijo.2015.3137        |
| negative Regulation: | CTNNB1 ---  chemosensitivity | 26316041 | 10.3892/ijo.2015.3137        |
| negative Regulation: | CTNNB1 ---  chemosensitivity | 26603103 | 10.1038/ncomms9904           |
| negative Regulation: | CTNNB1 ---  chemosensitivity | 21517265 |                              |
| negative Regulation: | CTNNB1 ---  chemosensitivity | 22550000 | 10.1002/jbmr.165010.1002/jb  |
| negative Regulation: | CTNNB1 ---  chemosensitivity | 25658419 | 10.1371/journal.pone.011709  |
| negative Regulation: | CTNNB1 ---  chemosensitivity | 26036631 | 10.18632/oncotarget.3896     |
| negative Regulation: | CTNNB1 ---  chemosensitivity | 26316041 | 10.3892/ijo.2015.313710.389  |
| negative Regulation: | CTNNB1 ---  chemosensitivity | 26316041 | 10.3892/ijo.2015.313710.389  |
| negative Regulation: | CTNNB1 ---  chemosensitivity | 26316041 | 10.3892/ijo.2015.313710.389  |
| negative Regulation: | CTNNB1 ---  chemosensitivity | 28121357 |                              |
| negative Regulation: | CTNNB1 ---  chemosensitivity | 31305293 | 10.1097/CAD.0000000000000074 |
| negative Regulation: | CTNNB1 ---  chemosensitivity | 31882431 |                              |
| negative Regulation: | CTNNB1 ---  chemosensitivity | 28967908 | 10.1038/onc.2017.328         |
| negative Regulation: | CTNNB1 ---  chemosensitivity |          | 10.3390/ijms20143518         |

|          |             |        |     |                  |          |                             |
|----------|-------------|--------|-----|------------------|----------|-----------------------------|
| negative | Regulation: | CTNNB1 | --- | chemosensitivity | 29342970 | 10.3390/ijms19010251        |
| negative | Regulation: | CTNNB1 | --- | chemosensitivity | 34498146 | 10.1007/s00432-021-03793-2  |
| negative | Regulation: | CTNNB1 | --- | chemosensitivity | 35163465 | 10.3390/ijms23031545        |
| negative | Regulation: | SAAL1  | --- | chemosensitivity | 32650537 | 10.3390/cancers1207184310.3 |
| negative | Regulation: | SAAL1  | --- | chemosensitivity | 35963646 | 10.18632/aging.204224       |
| negative | Regulation: | BCCIP  | --- | chemosensitivity | 27995408 | 10.1007/s10620-016-4382-0   |
| negative | Regulation: | PRDM14 | --- | chemosensitivity | 33355367 | 10.3892/mmr.2020.11788      |
| negative | Regulation: | PRDM14 | --- | chemosensitivity | 33355367 | 10.3892/mmr.2020.11788      |
| negative | Regulation: | PRDM14 | --- | chemosensitivity | 33355367 | 10.3892/mmr.2020.11788      |
| negative | Regulation: | PRDM14 | --- | chemosensitivity | 33355367 | 10.3892/mmr.2020.1178810.38 |
| negative | Regulation: | PRDM14 | --- | chemosensitivity | 33355367 | 10.3892/mmr.2020.1178810.38 |
| negative | Regulation: | PRDM14 | --- | chemosensitivity | 21339739 | 10.1038/onc.2011.12         |
| negative | Regulation: | PRDM14 | --- | chemosensitivity |          |                             |
| negative | Regulation: | TNNC1  | --- | chemosensitivity | 32946432 | 10.12659/MSM.922703         |
| negative | Regulation: | MEDAG  | --- | chemosensitivity | 33462219 | 10.1038/s41419-020-03340-w1 |
| negative | Regulation: | RAD51  | --- | chemosensitivity | 30337244 | 10.1016/j.jphs.2018.09.011  |
| negative | Regulation: | RAD51  | --- | chemosensitivity | 21168393 | 10.1016/j.bcp.2010.12.008   |
| negative | Regulation: | RAD51  | --- | chemosensitivity | 21810436 | 10.1016/j.taap.2011.07.012  |
| negative | Regulation: | RAD51  | --- | chemosensitivity | 17229870 |                             |
| negative | Regulation: | RAD51  | --- | chemosensitivity | 17229870 |                             |
| negative | Regulation: | RAD51  | --- | chemosensitivity | 17229870 |                             |
| negative | Regulation: | RAD51  | --- | chemosensitivity | 29620223 | 10.3892/or.2018.6336        |
| negative | Regulation: | RAD51  | --- | chemosensitivity | 30483758 | 10.3892/ijo.2018.4642       |
| negative | Regulation: | RAD51  | --- | chemosensitivity | 31638261 | 10.3892/or.2019.7384        |
| negative | Regulation: | RAD51  | --- | chemosensitivity | 31638261 | 10.3892/or.2019.7384        |
| negative | Regulation: | RAD51  | --- | chemosensitivity | 31638261 | 10.3892/or.2019.7384        |
| negative | Regulation: | RAD51  | --- | chemosensitivity | 20855443 | 10.1124/jpet.110.173146     |
| negative | Regulation: | RAD51  | --- | chemosensitivity | 21798026 | 10.1186/1476-4598-10-92     |
| negative | Regulation: | RAD51  | --- | chemosensitivity | 17513613 | 10.1158/1535-7163.MCT-06-06 |
| negative | Regulation: | RAD51  | --- | chemosensitivity | 20625943 | 10.1007/s12032-010-9605-110 |
| negative | Regulation: | RAD51  | --- | chemosensitivity | 24971740 | 10.1371/journal.pone.010099 |
| negative | Regulation: | RAD51  | --- | chemosensitivity | 27566579 | 10.18632/oncotarget.1154010 |
| negative | Regulation: | RAD51  | --- | chemosensitivity | 27566579 | 10.18632/oncotarget.1154010 |
| negative | Regulation: | RAD51  | --- | chemosensitivity | 31638261 | 10.3892/or.2019.738410.3892 |
| negative | Regulation: | PFKFB3 | --- | chemosensitivity | 33420377 | 10.1038/s41388-020-01621-4  |
| negative | Regulation: | PFKFB3 | --- | chemosensitivity | 33420377 | 10.1038/s41388-020-01621-4  |
| negative | Regulation: | PFKFB3 | --- | chemosensitivity | 30226266 | 10.1002/ijc.3186810.1002/ij |
| negative | Regulation: | PFKFB3 | --- | chemosensitivity | 33420377 | 10.1038/s41388-020-01621-4  |
| negative | Regulation: | PFKFB3 | --- | chemosensitivity | 35804016 | 10.1038/s41388-022-02391-x  |
| negative | Regulation: | PFKFB3 | --- | chemosensitivity | 35553342 | 10.1007/s11033-022-07513-y  |
| negative | Regulation: | CX3CR1 | --- | chemosensitivity | 35294039 | 10.3892/ijo.2022.5337       |
| negative | Regulation: | CX3CR1 | --- | chemosensitivity | 35294039 | 10.3892/ijo.2022.5337       |
| negative | Regulation: | ATP7A  | --- | chemosensitivity | 31226634 | 10.1016/j.biopha.2019.10913 |
| negative | Regulation: | ATP7A  | --- | chemosensitivity | 29772714 | 10.3390/ijms19051486        |
| negative | Regulation: | ATP7A  | --- | chemosensitivity | 22304828 | 10.1186/1479-5876-10-21     |
| negative | Regulation: | ATP7A  | --- | chemosensitivity | 24150977 | 10.1002/ijc.2852610.1002/ij |
| negative | Regulation: | TNKS   | --- | chemosensitivity | 24789807 | 10.3892/ijo.2014.2406       |
| negative | Regulation: | TNKS   | --- | chemosensitivity | 31585633 | 10.1016/j.mrgentox.2019.503 |
| negative | Regulation: | TNKS   | --- | chemosensitivity | 34713301 | 10.3892/IJMM.2021.5056      |
| negative | Regulation: | TNKS   | --- | chemosensitivity | 35750753 | 10.1038/s41417-022-00493-y  |
| negative | Regulation: | BDNF   | --- | chemosensitivity | 12438277 |                             |
| negative | Regulation: | BDNF   | --- | chemosensitivity | 27852063 | 10.18632/oncotarget.1329110 |
| negative | Regulation: | BDNF   | --- | chemosensitivity | 12691830 | 10.1016/s0304-3835(02)00723 |
| negative | Regulation: | BDNF   | --- | chemosensitivity | 26868822 | 10.1007/s11010-016-2660-y10 |

|                                                    |          |                             |
|----------------------------------------------------|----------|-----------------------------|
| negative Regulation: BDNF ---  chemosensitivity    | 36361620 | 10.3390/i.jms232112829      |
| negative Regulation: BDNF ---  chemosensitivity    | 36361620 | 10.3390/i.jms232112829      |
| negative Regulation: BDNF ---  chemosensitivity    | 36361620 | 10.3390/i.jms232112829      |
| negative Regulation: AURKB ---  chemosensitivity   | 22283874 | 10.1186/1423-0127-19-9      |
| negative Regulation: ADCYAP1 ---  chemosensitivity | 23597836 | 10.1016/j.resp.2013.04.009  |
| negative Regulation: ADCYAP1 ---  chemosensitivity | 21691246 | 10.1203/PDR.Ob013e318229474 |
| negative Regulation: BAG3 ---  chemosensitivity    | 29938246 | 10.1016/j.jacbts.2017.09.00 |
| negative Regulation: BAG3 ---  chemosensitivity    | 24992675 | 10.1016/j.ygyno.2014.06.024 |
| negative Regulation: BAG3 ---  chemosensitivity    | 26655271 | 10.1016/j.canlet.2015.11.03 |
| negative Regulation: BAG3 ---  chemosensitivity    | 27120977 | 10.3892/ijo.2016.3494       |
| negative Regulation: BAG3 ---  chemosensitivity    | 24992675 | 10.1016/j.ygyno.2014.06.024 |
| negative Regulation: BAG3 ---  chemosensitivity    | 24992675 | 10.1016/j.ygyno.2014.06.024 |
| negative Regulation: S100A7 ---  chemosensitivity  | 28923839 | 10.1158/1541-7786.MCR-17-03 |
| negative Regulation: ANGPTL4 ---  chemosensitivity | 30342537 | 10.1186/s12943-018-0904-z   |
| negative Regulation: ANGPTL4 ---  chemosensitivity | 33040824 | 10.14715/cmb/2020.66.5.21   |
| negative Regulation: CCN1 ---  chemosensitivity    | 17993234 | 10.1007/978-0-387-74039-3_6 |
| negative Regulation: CCN1 ---  chemosensitivity    | 31145521 | 10.1111/cas.1408310.1111/ca |
| negative Regulation: CCN1 ---  chemosensitivity    | 33753993 | 10.7150/jca.4889110.7150/jc |
| negative Regulation: CD9 ---  chemosensitivity     | 31624373 | 10.1038/s41375-019-0593-7   |
| negative Regulation: CD9 ---  chemosensitivity     | 31624373 | 10.1038/s41375-019-0593-710 |
| negative Regulation: CD9 ---  chemosensitivity     |          | 10.1038/s41375-019-0593-7   |
| negative Regulation: NRP1 ---  chemosensitivity    | 30824197 | 10.1016/j.molmed.2019.01.01 |
| negative Regulation: NRP1 ---  chemosensitivity    | 21338642 | 10.1016/j.jhep.2011.01.033  |
| negative Regulation: NRP1 ---  chemosensitivity    | 20087344 |                             |
| negative Regulation: NRP1 ---  chemosensitivity    | 15956974 |                             |
| negative Regulation: NRP1 ---  chemosensitivity    | 24992616 |                             |
| negative Regulation: NRP1 ---  chemosensitivity    | 24992616 |                             |
| negative Regulation: NRP1 ---  chemosensitivity    | 25392102 |                             |
| negative Regulation: NRP1 ---  chemosensitivity    | 25392102 |                             |
| negative Regulation: NRP1 ---  chemosensitivity    | 15956974 | 10.1038/sj.bjc.6602663      |
| negative Regulation: NRP1 ---  chemosensitivity    | 20087344 | 10.1038/sj.bjc.660553910.10 |
| negative Regulation: NRP1 ---  chemosensitivity    | 20087344 | 10.1038/sj.bjc.660553910.10 |
| negative Regulation: NRP1 ---  chemosensitivity    | 24992616 |                             |
| negative Regulation: NRP1 ---  chemosensitivity    | 24992616 |                             |
| negative Regulation: SIAH2 ---  chemosensitivity   | 29400343 | 10.12659/MSM.908553         |
| negative Regulation: SIAH2 ---  chemosensitivity   | 25997740 | 10.14348/molcells.2015.0051 |
| negative Regulation: SIAH2 ---  chemosensitivity   | 29400343 | 10.12659/msm.908553         |
| negative Regulation: CHEK1 ---  chemosensitivity   | 28888100 | 10.1016/j.neo.2017.08.002   |
| negative Regulation: CHEK1 ---  chemosensitivity   | 30055507 | 10.1016/j.dnarep.2018.07.00 |
| negative Regulation: CHEK1 ---  chemosensitivity   |          |                             |
| negative Regulation: CHEK1 ---  chemosensitivity   | 22641286 | 10.3892/or.2012.1833        |
| negative Regulation: CHEK1 ---  chemosensitivity   | 24138717 | 10.2174/1381612811319666075 |
| negative Regulation: CHEK1 ---  chemosensitivity   | 24804869 | 10.1097/IGC.000000000000013 |
| negative Regulation: CHEK1 ---  chemosensitivity   | 24804869 | 10.1097/IGC.000000000000013 |
| negative Regulation: RASAL2 ---  chemosensitivity  | 34826200 | 10.1002/tox.2341810.1002/tc |
| negative Regulation: POLR1H ---  chemosensitivity  | 23893241 | 10.1038/onc.2013.297        |
| negative Regulation: DNER ---  chemosensitivity    | 32811806 | 10.1038/s41419-020-02903-1  |
| negative Regulation: DNER ---  chemosensitivity    | 32811806 | 10.1038/s41419-020-02903-1  |
| negative Regulation: MAPK1 ---  chemosensitivity   | 30257357 | 10.1016/j.biopha.2018.08.13 |
| negative Regulation: MAPK1 ---  chemosensitivity   | 17690186 | 10.2353/ajpath.2007.070010  |
| negative Regulation: MAPK1 ---  chemosensitivity   | 30257357 | 10.1016/j.biopha.2018.08.13 |
| negative Regulation: MAPK1 ---  chemosensitivity   | 17482503 | 10.1016/j.drup.2007.03.003  |
| negative Regulation: MAPK1 ---  chemosensitivity   | 23073477 | 10.1016/j.canlet.2012.10.00 |
| negative Regulation: MAPK1 ---  chemosensitivity   | 28849180 | 10.3892/or.2017.5908        |

|          |             |        |     |                  |          |                             |
|----------|-------------|--------|-----|------------------|----------|-----------------------------|
| negative | Regulation: | MAPK1  | --- | chemosensitivity | 31133044 | 10.1186/s13046-019-1226-8   |
| negative | Regulation: | MAPK1  | --- | chemosensitivity | 32039627 | 10.4149/neo_2020_190604N486 |
| negative | Regulation: | MAPK1  | --- | chemosensitivity | 24104394 | 10.1038/leu.2013.291        |
| negative | Regulation: | MAPK1  | --- | chemosensitivity | 30257357 | 10.1016/j.biopha.2018.08.13 |
| negative | Regulation: | MAPK1  | --- | chemosensitivity | 22179790 | 10.3892/ijo.2011.1303       |
| negative | Regulation: | MAPK1  | --- | chemosensitivity | 22179790 | 10.3892/ijo.2011.1303       |
| negative | Regulation: | MAPK1  | --- | chemosensitivity | 22179790 | 10.3892/ijo.2011.1303       |
| negative | Regulation: | MAPK1  | --- | chemosensitivity | 26316041 | 10.3892/ijo.2015.3137       |
| negative | Regulation: | MAPK1  | --- | chemosensitivity | 22179790 | 10.3892/ijo.2011.1303       |
| negative | Regulation: | MAPK1  | --- | chemosensitivity | 22179790 | 10.3892/ijo.2011.1303       |
| negative | Regulation: | MMP1   | --- | chemosensitivity | 35586209 | 10.1155/2022/3249766        |
| negative | Regulation: | WNT5A  | --- | chemosensitivity | 27612668 | 10.1016/j.bbamcr.2016.09.00 |
| negative | Regulation: | WNT5A  | --- | chemosensitivity | 27077077 | 10.1016/j.gendis.2015.12.00 |
| negative | Regulation: | WNT5A  | --- | chemosensitivity | 28538104 | 10.1139/bcb-2016-0216       |
| negative | Regulation: | WNT5A  | --- | chemosensitivity | 29531296 | 10.1038/s41419-018-0343-1   |
| negative | Regulation: | WNT5A  | --- | chemosensitivity | 21270611 | 10.1097/IGC.0b013e31820aaad |
| negative | Regulation: | WNT5A  | --- | chemosensitivity | 21270611 | 10.1097/IGC.0b013e31820aaad |
| negative | Regulation: | WNT5A  | --- | chemosensitivity | 21270611 | 10.1097/IGC.0b013e31820aaad |
| negative | Regulation: | WNT5A  | --- | chemosensitivity | 21270611 | 10.1097/IGC.0b013e31820aaad |
| negative | Regulation: | WNT5A  | --- | chemosensitivity | 24606488 | 10.7314/APJCP.2014.15.3.148 |
| negative | Regulation: | WNT5A  | --- | chemosensitivity | 24785108 |                             |
| negative | Regulation: | WNT5A  | --- | chemosensitivity | 21270611 | 10.1097/IGC.0b013e31820aaad |
| negative | Regulation: | WNT5A  | --- | chemosensitivity | 21270611 | 10.1097/IGC.0b013e31820aaad |
| negative | Regulation: | SHFM1  | --- | chemosensitivity | 34031538 | 10.1038/s41374-021-00613-6  |
| negative | Regulation: | SHFM1  | --- | chemosensitivity | 34031538 | 10.1038/s41374-021-00613-6  |
| negative | Regulation: | SHFM1  | --- | chemosensitivity | 34031538 | 10.1038/s41374-021-00613-6  |
| negative | Regulation: | SHFM1  | --- | chemosensitivity | 34031538 | 10.1038/s41374-021-00613-6  |
| negative | Regulation: | SHFM1  | --- | chemosensitivity | 34031538 | 10.1038/s41374-021-00613-6  |
| negative | Regulation: | FAM83A | --- | chemosensitivity | 34931434 | 10.1002/tox.2343510.1002/to |
| negative | Regulation: | ABCE1  | --- | chemosensitivity | 25744244 | 10.1007/s12032-015-0557-3   |
| negative | Regulation: | KIF14  | --- | chemosensitivity | 30404039 | 10.1016/j.bbadis.2018.10.03 |
| negative | Regulation: | KIF14  | --- | chemosensitivity | 24784001 | 10.1016/j.neo.2014.03.008   |
| negative | Regulation: | KIF14  | --- | chemosensitivity | 24784001 | 10.1016/j.neo.2014.03.008   |
| negative | Regulation: | KIF14  | --- | chemosensitivity | 23479679 | 10.1158/1078-0432.CCR-13-00 |
| negative | Regulation: | KIF14  | --- | chemosensitivity | 24784001 | 10.1016/j.neo.2014.03.00810 |
| negative | Regulation: | KIF14  | --- | chemosensitivity | 33380832 | 10.2147/CMAR.S28536710.2147 |
| negative | Regulation: | KIF14  | --- | chemosensitivity | 33380832 | 10.2147/CMAR.S28536710.2147 |
| negative | Regulation: | KIF14  | --- | chemosensitivity | 35799605 | 10.1155/2022/7257738        |
| negative | Regulation: | LGR5   | --- | chemosensitivity | 30792218 | 10.1136/jim-2018-000934     |
| negative | Regulation: | LGR5   | --- | chemosensitivity | 31849331 | 10.1186/s12943-019-1116-x   |
| negative | Regulation: | LGR5   | --- | chemosensitivity | 24789370 | 10.3892/ijmm.2014.1752      |
| negative | Regulation: | LGR5   | --- | chemosensitivity | 24789370 | 10.3892/ijmm.2014.1752      |
| negative | Regulation: | LGR5   | --- | chemosensitivity | 24789370 | 10.3892/ijmm.2014.1752      |
| negative | Regulation: | LGR5   | --- | chemosensitivity | 24789370 | 10.3892/ijmm.2014.175210.38 |
| negative | Regulation: | AHR    | --- | chemosensitivity | 32877761 | 10.1016/j.semancer.2020.08  |
| negative | Regulation: | AHR    | --- | chemosensitivity | 32877761 | 10.1016/j.semancer.2020.08  |
| negative | Regulation: | CASC11 | --- | chemosensitivity | 31181314 | 10.1016/j.gene.2019.06.011  |
| negative | Regulation: | MIR222 | --- | chemosensitivity | 26796268 | 10.1016/j.biopha.2015.12.00 |
| negative | Regulation: | MIR222 | --- | chemosensitivity | 28887606 | 10.1007/s10616-017-0134-z   |
| negative | Regulation: | MIR222 | --- | chemosensitivity | 25474084 | 10.3390/ijms15122212810.339 |
| negative | Regulation: | MIR222 | --- | chemosensitivity | 25474084 | 10.3390/ijms15122212810.339 |
| negative | Regulation: | MIR222 | --- | chemosensitivity |          |                             |
| negative | Regulation: | MIR222 | --- | chemosensitivity |          | 10.12659/MSM.913325         |

|          |             |        |     |                  |          |                             |
|----------|-------------|--------|-----|------------------|----------|-----------------------------|
| negative | Regulation: | EFNB2  | --- | chemosensitivity | 26494468 | 10.1038/cdd.2015.133        |
| negative | Regulation: | EFNB2  | --- | chemosensitivity | 26494468 | 10.1038/cdd.2015.13310.1038 |
| negative | Regulation: | BIRC6  | --- | chemosensitivity | 32922121 | 10.3906/biy-1912-71         |
| negative | Regulation: | BIRC6  | --- | chemosensitivity | 23836645 | 10.1073/pnas.1300415110     |
| negative | Regulation: | BIRC6  | --- | chemosensitivity | 22027771 |                             |
| negative | Regulation: | BIRC6  | --- | chemosensitivity | 25216531 | 10.18632/oncotarget.2293    |
| negative | Regulation: | BIRC6  | --- | chemosensitivity | 25216531 | 10.18632/oncotarget.2293    |
| negative | Regulation: | BIRC6  | --- | chemosensitivity | 26191375 | 10.4172/1948-5956.1000335   |
| negative | Regulation: | BIRC6  | --- | chemosensitivity | 28358418 | 10.3892/or.2017.553510.3892 |
| negative | Regulation: | PART1  | --- | chemosensitivity | 34030482 | 10.1089/dna.2021.0059       |
| negative | Regulation: | USP1   | --- | chemosensitivity | 29731868 | 10.3892/ol.2018.818010.3892 |
| negative | Regulation: | SNHG14 | --- | chemosensitivity | 31121484 | 10.1016/j.biopha.2019.10899 |
| negative | Regulation: | FZD1   | --- | chemosensitivity | 29058015 | 10.1007/s00018-017-2685-8   |
| negative | Regulation: | SEMA4D | --- | chemosensitivity | 32888127 | 10.1007/s11033-020-05761-4  |
| negative | Regulation: | SEMA4D | --- | chemosensitivity | 32888127 | 10.1007/s11033-020-05761-41 |
| negative | Regulation: | SEMA4D | --- | chemosensitivity | 32888127 | 10.1007/s11033-020-05761-41 |
| negative | Regulation: | SEMA4D | --- | chemosensitivity | 33404909 | 10.1007/s11033-020-06099-71 |
| negative | Regulation: | MYC    | --- | chemosensitivity | 28089283 | 10.1016/j.clbc.2016.12.005  |
| negative | Regulation: | MYC    | --- | chemosensitivity | 28089283 | 10.1016/j.clbc.2016.12.005  |
| negative | Regulation: | MYC    | --- | chemosensitivity | 16938463 | 10.1016/j.semcancer.2006.08 |
| negative | Regulation: | MYC    | --- | chemosensitivity | 26211592 | 10.1016/j.biopha.2015.05.01 |
| negative | Regulation: | MYC    | --- | chemosensitivity | 27233476 | 10.1016/j.canlet.2016.05.02 |
| negative | Regulation: | MYC    | --- | chemosensitivity | 19134217 |                             |
| negative | Regulation: | MYC    | --- | chemosensitivity | 19134217 |                             |
| negative | Regulation: | MYC    | --- | chemosensitivity | 10551811 |                             |
| negative | Regulation: | MYC    | --- | chemosensitivity | 28184929 | 10.3892/or.2017.5432        |
| negative | Regulation: | MYC    | --- | chemosensitivity | 30459529 | 10.1186/s12935-018-0674-0   |
| negative | Regulation: | MYC    | --- | chemosensitivity | 31761897 | 10.12659/MSM.917345         |
| negative | Regulation: | MYC    | --- | chemosensitivity | 31761897 | 10.12659/MSM.917345         |
| negative | Regulation: | MYC    | --- | chemosensitivity | 24303084 | 10.1371/journal.pone.008247 |
| negative | Regulation: | MYC    | --- | chemosensitivity | 25341931 |                             |
| negative | Regulation: | MYC    | --- | chemosensitivity | 26528706 | 10.1038/bjc.2015.305        |
| negative | Regulation: | MYC    | --- | chemosensitivity | 10961689 |                             |
| negative | Regulation: | MYC    | --- | chemosensitivity | 17159602 | 10.1097/CAD.0b013e328010942 |
| negative | Regulation: | MYC    | --- | chemosensitivity | 26211592 | 10.1016/j.biopha.2015.05.01 |
| negative | Regulation: | MYC    | --- | chemosensitivity | 27793037 | 10.18632/oncotarget.1291110 |
| negative | Regulation: | MYC    | --- | chemosensitivity | 28089283 | 10.1016/j.clbc.2016.12.0051 |
| negative | Regulation: | MYC    | --- | chemosensitivity | 31761897 | 10.12659/MSM.91734510.12659 |
| negative | Regulation: | MYC    | --- | chemosensitivity |          | 10.12659/MSM.917345         |
| negative | Regulation: | MYC    | --- | chemosensitivity |          | 10.12659/MSM.917345         |
| negative | Regulation: | MYC    | --- | chemosensitivity | 34803511 | 10.7150/ijbs.62236          |
| negative | Regulation: | SIRT2  | --- | chemosensitivity | 25915617 | 10.1371/journal.pone.012467 |
| negative | Regulation: | SIRT2  | --- | chemosensitivity | 33566315 | 10.1007/s11845-021-02516-31 |
| negative | Regulation: | SIRT2  | --- | chemosensitivity | 33566315 | 10.1007/s11845-021-02516-31 |
| negative | Regulation: | SIRT2  | --- | chemosensitivity | 33566315 | 10.1007/s11845-021-02516-31 |
| negative | Regulation: | SIRT2  | --- | chemosensitivity | 33566315 | 10.1007/s11845-021-02516-3  |
| negative | Regulation: | SIRT2  | --- | chemosensitivity | 33566315 | 10.1007/s11845-021-02516-3  |
| negative | Regulation: | SIRT2  | --- | chemosensitivity | 33566315 | 10.1007/s11845-021-02516-3  |
| negative | Regulation: | HMOX1  | --- | chemosensitivity | 29524413 | 10.1016/j.bbrc.2018.03.030  |
| negative | Regulation: | HMOX1  | --- | chemosensitivity | 30076913 | 10.1016/j.fct.2018.07.059   |
| negative | Regulation: | HMOX1  | --- | chemosensitivity | 34020028 | 10.1016/j.semcancer.2021.05 |
| negative | Regulation: | HMOX1  | --- | chemosensitivity | 22684019 | 10.1016/j.freeradbiomed.201 |
| negative | Regulation: | HMOX1  | --- | chemosensitivity | 24200599 | 10.1016/j.freeradbiomed.201 |
| negative | Regulation: | HMOX1  | --- | chemosensitivity | 24413389 | 10.1097/CAD.000000000000006 |



|          |             |          |      |                  |          |                              |
|----------|-------------|----------|------|------------------|----------|------------------------------|
| negative | Regulation: | PPARGC1A | ---- | chemosensitivity | 30244973 | 10.1016/j.cmet.2018.09.002   |
| negative | Regulation: | MXD1     | ---- | chemosensitivity | 32827577 | 10.1016/j.bbcan.2020.188405  |
| negative | Regulation: | MIR6785  | ---- | chemosensitivity | 33609542 | 10.1016/j.lfs.2021.119222    |
| negative | Regulation: | MIR6785  | ---- | chemosensitivity | 30551491 | 10.1016/j.biopha.2018.10.06  |
| negative | Regulation: | MIR6785  | ---- | chemosensitivity | 33152911 | 10.1016/j.biopha.2020.11072  |
| negative | Regulation: | MIR6785  | ---- | chemosensitivity | 32209033 | 10.2174/1566524020666200226  |
| negative | Regulation: | MIR6785  | ---- | chemosensitivity | 30551491 | 10.1016/j.biopha.2018.10.06  |
| negative | Regulation: | GOLM1    | ---- | chemosensitivity | 33538941 | 10.1007/s10863-021-09875-7   |
| negative | Regulation: | GOLM1    | ---- | chemosensitivity | 33538941 | 10.1007/s10863-021-09875-71  |
| negative | Regulation: | NANOG    | ---- | chemosensitivity | 29198990 | 10.1016/j.cca.2017.11.037    |
| negative | Regulation: | NANOG    | ---- | chemosensitivity | 33460610 | 10.1016/j.ejphar.2021.17387  |
| negative | Regulation: | NANOG    | ---- | chemosensitivity | 33460610 | 10.1016/j.ejphar.2021.17387  |
| negative | Regulation: | NANOG    | ---- | chemosensitivity | 20671266 | 10.2353/ajpath.2010.100316   |
| negative | Regulation: | NANOG    | ---- | chemosensitivity | 23872274 | 10.1016/j.canlet.2013.07.00  |
| negative | Regulation: | NANOG    | ---- | chemosensitivity | 26687709 | 10.1016/j.gene.2015.12.023   |
| negative | Regulation: | NANOG    | ---- | chemosensitivity | 26939902 | 10.1007/s13277-016-5007-0    |
| negative | Regulation: | NANOG    | ---- | chemosensitivity | 27884977 | 10.1042/BSR20160247          |
| negative | Regulation: | NANOG    | ---- | chemosensitivity | 31165741 | 10.1038/s41419-019-1686-y    |
| negative | Regulation: | NANOG    | ---- | chemosensitivity | 32899775 | 10.3390/i.jms21186467        |
| negative | Regulation: | NANOG    | ---- | chemosensitivity | 22714588 | 10.1007/s00432-012-1253-8    |
| negative | Regulation: | NANOG    | ---- | chemosensitivity | 24647772 | 10.3892/i.jo.2014.2347       |
| negative | Regulation: | NANOG    | ---- | chemosensitivity | 24647772 | 10.3892/i.jo.2014.2347       |
| negative | Regulation: | NANOG    | ---- | chemosensitivity |          |                              |
| negative | Regulation: | NANOG    | ---- | chemosensitivity | 26676719 | 10.3892/or.2015.4483         |
| negative | Regulation: | NANOG    | ---- | chemosensitivity | 26676719 | 10.3892/or.2015.4483         |
| negative | Regulation: | NANOG    | ---- | chemosensitivity | 26676719 | 10.3892/or.2015.4483         |
| negative | Regulation: | NANOG    | ---- | chemosensitivity | 26676719 | 10.3892/or.2015.4483         |
| negative | Regulation: | NANOG    | ---- | chemosensitivity | 26936116 | 10.3892/or.2016.4639         |
| negative | Regulation: | NANOG    | ---- | chemosensitivity | 26446457 | 10.1007/s13277-015-4155-y    |
| negative | Regulation: | NANOG    | ---- | chemosensitivity | 19633292 | 10.1074/jbc.M109.02746610.1  |
| negative | Regulation: | NANOG    | ---- | chemosensitivity | 21685938 | 10.1038/onc.2011.22210.1038  |
| negative | Regulation: | NANOG    | ---- | chemosensitivity | 22714588 | 10.1007/s00432-012-1253-8    |
| negative | Regulation: | NANOG    | ---- | chemosensitivity | 24647772 | 10.3892/i.jo.2014.234710.389 |
| negative | Regulation: | NANOG    | ---- | chemosensitivity | 25245189 | 10.18632/oncotarget.2298     |
| negative | Regulation: | NANOG    | ---- | chemosensitivity | 26676719 | 10.3892/or.2015.448310.3892  |
| negative | Regulation: | NANOG    | ---- | chemosensitivity | 34453639 | 10.1007/s10555-021-09979-x   |
| negative | Regulation: | NANOG    | ---- | chemosensitivity | 35398618 | 10.1016/j.prp.2022.15386910  |
| negative | Regulation: | NANOG    | ---- | chemosensitivity | 36209968 | 10.1016/j.bmc1.2022.129017   |
| negative | Regulation: | PDZD7    | ---- | chemosensitivity | 30786928 | 10.1186/s13046-019-1106-2    |
| negative | Regulation: | PDZD7    | ---- | chemosensitivity | 30786928 | 10.1186/s13046-019-1106-2    |
| negative | Regulation: | PDZD7    | ---- | chemosensitivity | 30786928 | 10.1186/s13046-019-1106-2    |
| negative | Regulation: | PDZD7    | ---- | chemosensitivity | 30786928 | 10.1186/s13046-019-1106-2    |
| negative | Regulation: | PDZD7    | ---- | chemosensitivity | 30786928 | 10.1186/s13046-019-1106-2    |
| negative | Regulation: | PDZD7    | ---- | chemosensitivity | 30786928 | 10.1186/s13046-019-1106-2    |
| negative | Regulation: | PDZD7    | ---- | chemosensitivity | 30786928 | 10.1186/s13046-019-1106-210  |
| negative | Regulation: | SPHK1    | ---- | chemosensitivity | 19240026 | 10.1074/jbc.M900735200       |
| negative | Regulation: | SPHK1    | ---- | chemosensitivity | 19240026 | 10.1074/jbc.M900735200       |
| negative | Regulation: | SPHK1    | ---- | chemosensitivity | 30347210 | 10.1016/j.pharmthera.2018.1  |
| negative | Regulation: | SPHK1    | ---- | chemosensitivity | 17669501 | 10.1016/j.pharmthera.2007.0  |
| negative | Regulation: | SPHK1    | ---- | chemosensitivity | 19240026 |                              |
| negative | Regulation: | SPHK1    | ---- | chemosensitivity | 19240026 |                              |
| negative | Regulation: | SPHK1    | ---- | chemosensitivity | 19240026 |                              |
| negative | Regulation: | SPHK1    | ---- | chemosensitivity | 27065335 | 10.1038/onc.2016.90          |



|          |                   |      |                  |          |                             |
|----------|-------------------|------|------------------|----------|-----------------------------|
| negative | Regulation: SPHK1 | ---- | chemosensitivity | 27065335 | 10.1038/onc.2016.90         |
| negative | Regulation: SPHK1 | ---- | chemosensitivity | 27065335 | 10.1038/onc.2016.90         |
| negative | Regulation: SPHK1 | ---- | chemosensitivity | 27127108 |                             |
| negative | Regulation: SPHK1 | ---- | chemosensitivity | 28804221 | 10.1155/2017/7510496        |
| negative | Regulation: SPHK1 | ---- | chemosensitivity | 30607469 | 10.1007/s00210-018-01607-w  |
| negative | Regulation: SPHK1 | ---- | chemosensitivity | 31636343 | 10.1038/s41375-019-0577-7   |
| negative | Regulation: SPHK1 | ---- | chemosensitivity | 22469881 | 10.3892/or.2012.1743        |
| negative | Regulation: SPHK1 | ---- | chemosensitivity | 22812190 | 10.3727/096504012X133424637 |
| negative | Regulation: SPHK1 | ---- | chemosensitivity | 22833671 | 10.1074/jbc.M112.385765     |
| negative | Regulation: SPHK1 | ---- | chemosensitivity | 22984905 | 10.1089/lrb.2012.0010       |
| negative | Regulation: SPHK1 | ---- | chemosensitivity | 23232649 | 10.3892/i.jo.2012.1733      |
| negative | Regulation: SPHK1 | ---- | chemosensitivity | 19240026 | 10.1074/jbc.M90073520010.10 |
| negative | Regulation: SPHK1 | ---- | chemosensitivity | 28502300 |                             |
| negative | Regulation: SPHK1 | ---- | chemosensitivity | 28502300 |                             |
| negative | Regulation: SMO   | ---- | chemosensitivity | 33743723 | 10.1186/s12967-021-02789-3  |
| negative | Regulation: WASF1 | ---- | chemosensitivity | 33558065 | 10.1016/j.pathol.2020.11.00 |
| negative | Regulation: WASF1 | ---- | chemosensitivity | 33558065 | 10.1016/j.pathol.2020.11.00 |
| negative | Regulation: FOXM1 | ---- | chemosensitivity | 32711110 | 10.1016/j.cellsig.2020.1097 |
| negative | Regulation: FOXM1 | ---- | chemosensitivity | 30017390 | 10.1016/j.cyto.2018.06.018  |
| negative | Regulation: FOXM1 | ---- | chemosensitivity | 31082791 | 10.1016/j.omtn.2019.04.008  |
| negative | Regulation: FOXM1 | ---- | chemosensitivity | 31082791 | 10.1016/j.omtn.2019.04.008  |
| negative | Regulation: FOXM1 | ---- | chemosensitivity | 31082791 | 10.1016/j.omtn.2019.04.008  |
| negative | Regulation: FOXM1 | ---- | chemosensitivity | 31082791 | 10.1016/j.omtn.2019.04.008  |
| negative | Regulation: FOXM1 | ---- | chemosensitivity | 23177020 | 10.1016/j.lungcan.2012.10.0 |
| negative | Regulation: FOXM1 | ---- | chemosensitivity | 27439614 | 10.1186/s12885-016-2542-4   |
| negative | Regulation: FOXM1 | ---- | chemosensitivity | 27415661 | 10.1159/000445653           |
| negative | Regulation: FOXM1 | ---- | chemosensitivity | 30992007 | 10.1186/s12964-019-0347-1   |
| negative | Regulation: FOXM1 | ---- | chemosensitivity | 31322278 | 10.3892/or.2019.7225        |
| negative | Regulation: FOXM1 | ---- | chemosensitivity | 33292277 | 10.1186/s12935-020-01631-y  |
| negative | Regulation: FOXM1 | ---- | chemosensitivity | 33311446 | 10.1038/s41419-020-03282-3  |
| negative | Regulation: FOXM1 | ---- | chemosensitivity | 33291076 | 10.18632/aging.202300       |
| negative | Regulation: FOXM1 | ---- | chemosensitivity | 33221995 | 10.1007/s00432-020-03438-w  |
| negative | Regulation: FOXM1 | ---- | chemosensitivity | 23912794 | 10.3892/or.2013.2654        |
| negative | Regulation: FOXM1 | ---- | chemosensitivity | 24148180 | 10.1186/1479-5876-11-265    |
| negative | Regulation: FOXM1 | ---- | chemosensitivity | 25760224 | 10.3892/mmr.2015.3469       |
| negative | Regulation: FOXM1 | ---- | chemosensitivity | 25760224 | 10.3892/mmr.2015.3469       |
| negative | Regulation: FOXM1 | ---- | chemosensitivity | 24314213 |                             |
| negative | Regulation: FOXM1 | ---- | chemosensitivity | 25760224 | 10.3892/mmr.2015.346910.389 |
| negative | Regulation: FOXM1 | ---- | chemosensitivity | 26560505 | 10.1111/cas.1284610.1111/ca |
| negative | Regulation: FOXM1 | ---- | chemosensitivity | 27162541 | 10.7150/jca.1446110.7150/jc |
| negative | Regulation: FOXM1 | ---- | chemosensitivity | 27439614 | 10.1186/s12885-016-2542-410 |
| negative | Regulation: FOXM1 | ---- | chemosensitivity | 31814893 |                             |
| negative | Regulation: FOXM1 | ---- | chemosensitivity | 682      | 10.1016/j.cyto.2018.06.018  |
| negative | Regulation: FOXM1 | ---- | chemosensitivity |          | 10.1186/s12964-019-0347-1   |
| negative | Regulation: FOXM1 | ---- | chemosensitivity |          | 10.3892/or.2019.7225        |
| negative | Regulation: FOXM1 | ---- | chemosensitivity |          | 10.1186/s12935-020-01631-y  |
| negative | Regulation: FOXM1 | ---- | chemosensitivity | 34812991 | 10.1007/s12032-021-01610-x  |
| negative | Regulation: FOXM1 | ---- | chemosensitivity | 34825342 | 10.1007/s13577-021-00650-9  |
| negative | Regulation: BMI1  | ---- | chemosensitivity | 22112692 | 10.1016/j.critrevonc.2011.1 |
| negative | Regulation: BMI1  | ---- | chemosensitivity | 28830551 | 10.1186/s12943-017-0711-y   |
| negative | Regulation: BMI1  | ---- | chemosensitivity | 29200967 | 10.1186/s12935-017-0481-z   |
| negative | Regulation: BMI1  | ---- | chemosensitivity | 24317363 | 10.3892/or.2013.2897        |
| negative | Regulation: BMI1  | ---- | chemosensitivity | 24317363 | 10.3892/or.2013.2897        |
| negative | Regulation: BMI1  | ---- | chemosensitivity | 24317363 | 10.3892/or.2013.2897        |

|          |             |            |     |                  |          |                             |
|----------|-------------|------------|-----|------------------|----------|-----------------------------|
| negative | Regulation: | BMI1       | --- | chemosensitivity | 25286028 | 10.1038/labinvest.2014.123  |
| negative | Regulation: | BMI1       | --- | chemosensitivity | 25286028 | 10.1038/labinvest.2014.123  |
| negative | Regulation: | BMI1       | --- | chemosensitivity | 25915207 | 10.1371/journal.pone.012320 |
| negative | Regulation: | BMI1       | --- | chemosensitivity | 25915207 | 10.1371/journal.pone.012320 |
| negative | Regulation: | BMI1       | --- | chemosensitivity | 18452707 | 10.1016/j.bbrc.2008.04.1171 |
| negative | Regulation: | BMI1       | --- | chemosensitivity | 23205090 | 10.3892/ol.2012.805         |
| negative | Regulation: | BMI1       | --- | chemosensitivity | 25286028 | 10.1038/labinvest.2014.1231 |
| negative | Regulation: | BMI1       | --- | chemosensitivity | 26622537 | 10.3892/ol.2015.3361        |
| negative | Regulation: | FLT4       | --- | chemosensitivity | 27931843 | 10.1016/j.critrevonc.2016.1 |
| negative | Regulation: | FLT4       | --- | chemosensitivity | 29048623 | 10.3892/or.2017.5969        |
| negative | Regulation: | FLT4       | --- | chemosensitivity | 29048623 | 10.3892/or.2017.5969        |
| negative | Regulation: | FLT4       | --- | chemosensitivity | 34904812 | 10.1097/PP0.000000000000056 |
| negative | Regulation: | XPA        | --- | chemosensitivity | 32007918 | 10.1016/j.biopha.2020.10989 |
| negative | Regulation: | XPA        | --- | chemosensitivity | 32007918 | 10.1016/j.biopha.2020.10989 |
| negative | Regulation: | ATG4D      | --- | chemosensitivity | 31291988 | 10.1186/s13046-019-1287-8   |
| negative | Regulation: | PLCG1      | --- | chemosensitivity | 28978037 | 10.18632/oncotarget.1863110 |
| negative | Regulation: | PCAT1      | --- | chemosensitivity | 30530229 | 10.1016/j.biopha.2018.12.01 |
| negative | Regulation: | PCAT1      | --- | chemosensitivity | 30530229 | 10.1016/j.biopha.2018.12.01 |
| negative | Regulation: | PCAT1      | --- | chemosensitivity | 31273188 | 10.1038/s41419-019-1745-4   |
| negative | Regulation: | PCAT1      | --- | chemosensitivity | 29314203 | 10.1002/cbf.331410.1002/cbf |
| negative | Regulation: | PCAT1      | --- | chemosensitivity | 33277833 |                             |
| negative | Regulation: | AGGF1      | --- | chemosensitivity | 33168501 | 10.3969/j.issn.1673-4254.20 |
| negative | Regulation: | MIR19A     | --- | chemosensitivity | 33023313 | 10.1177/0963689720962460    |
| negative | Regulation: | MIR19A     | --- | chemosensitivity | 30655782 | 10.3892/ol.2018.959210.3892 |
| negative | Regulation: | MIR19A     | --- | chemosensitivity | 30655782 | 10.3892/ol.2018.959210.3892 |
| negative | Regulation: | MIR19A     | --- | chemosensitivity | 30655782 | 10.3892/ol.2018.959210.3892 |
| negative | Regulation: | TRIM29     | --- | chemosensitivity | 30876939 | 10.1016/j.lfs.2019.03.028   |
| negative | Regulation: | TRIM29     | --- | chemosensitivity | 30876939 | 10.1016/j.lfs.2019.03.028   |
| negative | Regulation: | TRIM29     | --- | chemosensitivity | 33930453 | 10.1016/j.pharmthera.2021.1 |
| negative | Regulation: | TRIM29     | --- | chemosensitivity | 28098872 | 10.3892/or.2017.5364        |
| negative | Regulation: | TRIM29     | --- | chemosensitivity | 28098872 | 10.3892/or.2017.5364        |
| negative | Regulation: | TRIM29     | --- | chemosensitivity | 32901838 | 10.3892/mmr.2020.11473      |
| negative | Regulation: | TRIM29     | --- | chemosensitivity | 26273332 | 10.1111/1759-7714.1213010.1 |
| negative | Regulation: | SNHG22     | --- | chemosensitivity | 32306838 | 10.1080/15384101.2020.17494 |
| negative | Regulation: | POU4F1     | --- | chemosensitivity | 32988584 | 10.1016/j.bbrc.2020.09.003  |
| negative | Regulation: | POU4F1     | --- | chemosensitivity | 32988584 | 10.1016/j.bbrc.2020.09.0031 |
| negative | Regulation: | MFG8       | --- | chemosensitivity | 32324268 | 10.1002/jcp.2971210.1002/jc |
| negative | Regulation: | FOXP3      | --- | chemosensitivity | 28935177 | 10.1016/j.prp.2017.09.004   |
| negative | Regulation: | FOXP3      | --- | chemosensitivity | 28935177 | 10.1016/j.prp.2017.09.004   |
| negative | Regulation: | FOXP3      | --- | chemosensitivity | 28935177 | 10.1016/j.prp.2017.09.004   |
| negative | Regulation: | FOXP3      | --- | chemosensitivity | 28935177 | 10.1016/j.prp.2017.09.004   |
| negative | Regulation: | FOXP3      | --- | chemosensitivity | 30360388 | 10.3390/ijms19103279        |
| negative | Regulation: | FOXP3      | --- | chemosensitivity | 28935177 | 10.1016/j.prp.2017.09.00410 |
| negative | Regulation: | FOXP3      | --- | chemosensitivity | 28935177 | 10.1016/j.prp.2017.09.00410 |
| negative | Regulation: | FOXP3      | --- | chemosensitivity | 35401877 | 10.1155/2022/4534080        |
| negative | Regulation: | FOXP3      | --- | chemosensitivity | 36235242 | 10.3390/molecules27196706   |
| negative | Regulation: | MASTL      | --- | chemosensitivity | 30445205 | 10.1016/j.canlet.2018.11.01 |
| negative | Regulation: | MASTL      | --- | chemosensitivity | 30068336 | 10.1186/s12943-018-0848-3   |
| negative | Regulation: | r_Mir29b-3 | --- | chemosensitivity | 30747209 | 10.3892/ijo.2019.4695       |
| negative | Regulation: | SLPI       | --- | chemosensitivity | 36595102 | 10.1007/s12672-022-00535-9  |
| negative | Regulation: | FOXA1      | --- | chemosensitivity | 29665655 | 10.1016/j.biopha.2018.01.07 |
| negative | Regulation: | FOXA1      | --- | chemosensitivity |          |                             |
| negative | Regulation: | FOXA1      | --- | chemosensitivity |          |                             |
| negative | Regulation: | FOXA1      | --- | chemosensitivity |          |                             |

|                               |     |                  |          |                                  |
|-------------------------------|-----|------------------|----------|----------------------------------|
| negative Regulation: FOXA1    | --- | chemosensitivity |          |                                  |
| negative Regulation: FOXA1    | --- | chemosensitivity |          |                                  |
| negative Regulation: FOXA1    | --- | chemosensitivity |          |                                  |
| negative Regulation: FOXA1    | --- | chemosensitivity |          |                                  |
| negative Regulation: FOXA1    | --- | chemosensitivity | 29072684 | 10. 1038/cddis. 2017. 553        |
| negative Regulation: FOXA1    | --- | chemosensitivity | 29442000 | 10. 1691/ph. 2016. 676410. 1691  |
| negative Regulation: FOXA1    | --- | chemosensitivity | 31317696 |                                  |
| negative Regulation: FOXA1    | --- | chemosensitivity | 36230619 | 10. 3390/cancers14194699         |
| negative Regulation: NSD2     | --- | chemosensitivity | 30683853 | 10. 1038/s41419-019-1347-1       |
| negative Regulation: NSD2     | --- | chemosensitivity | 30683853 | 10. 1038/s41419-019-1347-1       |
| negative Regulation: NSD2     | --- | chemosensitivity | 30683853 | 10. 1038/s41419-019-1347-1       |
| negative Regulation: NSD2     | --- | chemosensitivity | 30683853 | 10. 1038/s41419-019-1347-110     |
| negative Regulation: NSD2     | --- | chemosensitivity | 33469000 | 10. 1038/s41420-021-00402-61     |
| negative Regulation: NSD2     | --- | chemosensitivity | 33469000 | 10. 1038/s41420-021-00402-61     |
| negative Regulation: NSD2     | --- | chemosensitivity | 35748228 | 10. 14348/molcells. 2022. 0014   |
| negative Regulation: CXCR2    | --- | chemosensitivity | 31731888 | 10. 1080/15384101. 2019. 16894   |
| negative Regulation: CXCR2    | --- | chemosensitivity | 21565970 | 10. 1530/ERC-10-0343             |
| negative Regulation: PAK5     | --- | chemosensitivity | 23877225 | 10. 1007/s11010-013-1767-710     |
| negative Regulation: RBM24    | --- | chemosensitivity | 34558639 | 10. 3892/ijo. 2021. 526710. 389  |
| negative Regulation: UBE2C    | --- | chemosensitivity | 31875843 | 10. 1016/j. bbrc. 2019. 12. 058  |
| negative Regulation: UBE2C    | --- | chemosensitivity | 30146342 | 10. 1016/j. ebiom. 2018. 08. 001 |
| negative Regulation: UBE2C    | --- | chemosensitivity | 30146342 | 10. 1016/j. ebiom. 2018. 08. 001 |
| negative Regulation: UBE2C    | --- | chemosensitivity | 29303411 | 10. 1080/15384047. 2017. 14169   |
| negative Regulation: UBE2C    | --- | chemosensitivity | 32192022 | 10. 3390/ijms21062041            |
| negative Regulation: UBE2C    | --- | chemosensitivity | 22760214 | 10. 1007/s00432-012-1275-2       |
| negative Regulation: UBE2C    | --- | chemosensitivity | 22760214 | 10. 1007/s00432-012-1275-210     |
| negative Regulation: UBE2C    | --- | chemosensitivity | 23275705 | 10. 6026/9732063008104710. 60    |
| negative Regulation: UBE2C    | --- | chemosensitivity | 25739083 | 10. 3390/ijms1603469810. 3390    |
| negative Regulation: PTPMT1   | --- | chemosensitivity | 24709986 | 10. 1371/journal. pone. 009389   |
| negative Regulation: PTPMT1   | --- | chemosensitivity | 24709986 | 10. 1371/journal. pone. 009389   |
| negative Regulation: PTPMT1   | --- | chemosensitivity | 24709986 | 10. 1371/journal. pone. 009389   |
| negative Regulation: LGALS3   | --- | chemosensitivity | 19124005 | 10. 1016/j. bbrc. 2008. 12. 153  |
| negative Regulation: LGALS3   | --- | chemosensitivity | 27012551 | 10. 1007/s13277-016-5004-3       |
| negative Regulation: LGALS3   | --- | chemosensitivity | 28870921 | 10. 21873/anticancer. 11909      |
| negative Regulation: LGALS3   | --- | chemosensitivity | 30626779 | 10. 2131/jts. 44. 47             |
| negative Regulation: LGALS3   | --- | chemosensitivity | 21368866 | 10. 1038/cddis. 2010. 79         |
| negative Regulation: LGALS3   | --- | chemosensitivity | 19199318 | 10. 1002/path. 251010. 1002/pa   |
| negative Regulation: LGALS3   | --- | chemosensitivity | 28146425 | 10. 18632/oncotarget. 1483910    |
| negative Regulation: TCF3     | --- | chemosensitivity | 26961878 | 10. 1074/jbc. M115. 696609       |
| negative Regulation: STK35    | --- | chemosensitivity | 33117809 | 10. 3389/fcell. 2020. 58269510   |
| negative Regulation: ATG3     | --- | chemosensitivity | 29966607 | 10. 1016/j. lfs. 2018. 06. 034   |
| negative Regulation: SERPINB3 | --- | chemosensitivity | 30825353 | 10. 1111/cas. 1398610. 1111/ca   |
| negative Regulation: G3BP1    | --- | chemosensitivity | 33000280 | 10. 3892/mmr. 2020. 11527        |
| negative Regulation: TIGAR    | --- | chemosensitivity | 33510458 | 10. 1038/s41401-020-00588-y      |
| negative Regulation: RIPK4    | --- | chemosensitivity | 24519546 | 10. 5301/jbm. 5000073            |
| negative Regulation: CPE      | --- | chemosensitivity | 25374060 | 10. 1007/s13277-014-2564-y10     |
| negative Regulation: FAM201A  | --- | chemosensitivity | 36067543 | 10. 1016/j. tranon. 2022. 10149  |
| negative Regulation: ITGB3    | --- | chemosensitivity | 30563517 | 10. 1186/s12943-018-0924-8       |
| negative Regulation: AKR1B10  | --- | chemosensitivity | 24656094 | 10. 1016/j. humpath. 2013. 12. C |
| negative Regulation: MTOR     | --- | chemosensitivity | 32841911 | 10. 1016/j. biomaterials. 2020   |
| negative Regulation: MTOR     | --- | chemosensitivity | 33839294 | 10. 1016/j. semcancer. 2021. 04  |
| negative Regulation: MTOR     | --- | chemosensitivity | 32422572 | 10. 1016/j. tranon. 2020. 10076  |
| negative Regulation: MTOR     | --- | chemosensitivity | 18395956 | 10. 1016/j. ejogrb. 2007. 12. 02 |
| negative Regulation: MTOR     | --- | chemosensitivity | 16540312 | 10. 1016/j. ejca. 2005. 12. 018  |

|          |                      |     |                  |          |                             |
|----------|----------------------|-----|------------------|----------|-----------------------------|
| negative | Regulation: MTOR     | --- | chemosensitivity | 30419950 | 10.1186/s13046-018-0947-4   |
| negative | Regulation: MTOR     | --- | chemosensitivity |          |                             |
| negative | Regulation: MTOR     | --- | chemosensitivity | 32422572 | 10.1016/j.tranon.2020.10076 |
| negative | Regulation: MTOR     | --- | chemosensitivity | 32608202 | 10.3349/YMJ.2020.61.7.587   |
| negative | Regulation: MTOR     | --- | chemosensitivity | 32927648 | 10.3390/molecules25184136   |
| negative | Regulation: MTOR     | --- | chemosensitivity | 22785211 | 10.4161/cbt.20838           |
| negative | Regulation: MTOR     | --- | chemosensitivity | 22873368 |                             |
| negative | Regulation: MTOR     | --- | chemosensitivity | 20878074 | 10.3892/ijo-00000778        |
| negative | Regulation: MTOR     | --- | chemosensitivity | 23818585 | 10.1073/pnas.1220898110     |
| negative | Regulation: MTOR     | --- | chemosensitivity |          |                             |
| negative | Regulation: MTOR     | --- | chemosensitivity | 16540312 | 10.1016/j.ejca.2005.12.018  |
| negative | Regulation: MTOR     | --- | chemosensitivity | 18824293 | 10.1016/j.canlet.2008.08.01 |
| negative | Regulation: MTOR     | --- | chemosensitivity | 19694375 |                             |
| negative | Regulation: MTOR     | --- | chemosensitivity | 22785211 | 10.4161/cbt.2083810.4161/cb |
| negative | Regulation: MTOR     | --- | chemosensitivity | 23433853 | 10.1016/j.biopha.2012.11.00 |
| negative | Regulation: MTOR     | --- | chemosensitivity | 24444656 | 10.1016/j.molonc.2013.12.01 |
| negative | Regulation: MTOR     | --- | chemosensitivity | 27301639 | 10.1016/j.bbrc.2016.06.0571 |
| negative | Regulation: MTOR     | --- | chemosensitivity | 33179318 | 10.1111/cas.1473310.1111/ca |
| negative | Regulation: MTOR     | --- | chemosensitivity | 34358725 | 10.1016/j.jtho.2021.07.018  |
| negative | Regulation: MTOR     | --- | chemosensitivity |          | 10.7150/IJBS.61175          |
| negative | Regulation: MTOR     | --- | chemosensitivity | 34358725 | 10.1016/j.jtho.2021.07.018  |
| negative | Regulation: MTOR     | --- | chemosensitivity | 36396656 | 10.1038/s41467-022-34890-6  |
| negative | Regulation: MTOR     | --- | chemosensitivity | 36396656 | 10.1038/s41467-022-34890-6  |
| negative | Regulation: HOXB4    | --- | chemosensitivity | 29660518 | 10.1016/j.gene.2018.04.033  |
| negative | Regulation: HOXB4    | --- | chemosensitivity | 27779650 | 10.3892/ijo.2016.373810.389 |
| negative | Regulation: ATF6     | --- | chemosensitivity | 30413206 | 10.1186/s13046-018-0935-8   |
| negative | Regulation: PRKCH    | --- | chemosensitivity | 24784886 | 10.1016/j.canlet.2014.04.02 |
| negative | Regulation: PRKCH    | --- | chemosensitivity | 25399563 | 10.1042/BST20140182         |
| negative | Regulation: PRKCH    | --- | chemosensitivity |          | 10.1042/BST20140182         |
| negative | Regulation: MED19    | --- | chemosensitivity | 25735376 | 10.7314/apjcp.2015.16.3.875 |
| negative | Regulation: MED19    | --- | chemosensitivity | 30161287 | 10.1002/jcb.2740610.1002/jc |
| negative | Regulation: MED19    | --- | chemosensitivity | 35637945 | 10.7150/ijbs.73504          |
| negative | Regulation: NTRK1    | --- | chemosensitivity | 27264679 | 10.1016/j.bbcan.2016.05.003 |
| negative | Regulation: NTRK1    | --- | chemosensitivity | 31485624 | 10.3892/or.2019.7296        |
| negative | Regulation: NTRK1    | --- | chemosensitivity | 25785038 |                             |
| negative | Regulation: NTRK1    | --- | chemosensitivity | 25785038 |                             |
| negative | Regulation: NTRK1    | --- | chemosensitivity |          | 10.3892/or.2019.7296        |
| negative | Regulation: BAG1     | --- | chemosensitivity | 34402163 | 10.1111/jcmm.1682210.1111/j |
| negative | Regulation: RBM3     | --- | chemosensitivity | 19900510 | 10.1016/j.bbcan.2009.11.001 |
| negative | Regulation: RBM3     | --- | chemosensitivity | 27147467 | 10.1007/s00018-016-2253-7   |
| negative | Regulation: RBM3     | --- | chemosensitivity | 23673116 | 10.3760/cma.j.issn.0366-699 |
| negative | Regulation: RBM3     | --- | chemosensitivity | 35109796 | 10.1186/s12885-021-09168-7  |
| negative | Regulation: MSI1     | --- | chemosensitivity | 30362859 | 10.1080/15476286.2018.15396 |
| negative | Regulation: MSI1     | --- | chemosensitivity | 32786108 | 10.1002/jcb.2983310.1002/jc |
| negative | Regulation: SOD2     | --- | chemosensitivity | 31364751 | 10.3892/or.2019.7252        |
| negative | Regulation: SOD2     | --- | chemosensitivity | 31364751 | 10.3892/or.2019.7252        |
| negative | Regulation: SOD2     | --- | chemosensitivity | 23964924 | 10.1089/ars.2013.5295       |
| negative | Regulation: SOD2     | --- | chemosensitivity | 23964924 | 10.1089/ars.2013.5295       |
| negative | Regulation: SOD2     | --- | chemosensitivity | 23964924 | 10.1089/ars.2013.5295       |
| negative | Regulation: SOD2     | --- | chemosensitivity |          | 10.3892/or.2019.7252        |
| negative | Regulation: SOD2     | --- | chemosensitivity |          | 10.3892/or.2019.7252        |
| negative | Regulation: SOD2     | --- | chemosensitivity | 23964924 | 10.1089/ars.2013.5295       |
| negative | Regulation: SOD2     | --- | chemosensitivity |          |                             |
| negative | Regulation: LEF1-AS1 | --- | chemosensitivity | 32786108 | 10.1002/jcb.2983310.1002/jc |

|                      |           |     |                  |                                      |
|----------------------|-----------|-----|------------------|--------------------------------------|
| negative Regulation: | TRIM14    | --- | chemosensitivity | 10.1038/s41388-018-0344-710          |
| negative Regulation: | UIMC1     | --- | chemosensitivity | 22573342 10.1007/s10620-012-2132-5   |
| negative Regulation: | UIMC1     | --- | chemosensitivity | 22573342 10.1007/s10620-012-2132-510 |
| negative Regulation: | UIMC1     | --- | chemosensitivity | 27998448 10.3760/cma.j.issn.0253-376 |
| negative Regulation: | UIMC1     | --- | chemosensitivity | 30705591 10.2147/OTT.S18698110.2147/ |
| negative Regulation: | L1CAM     | --- | chemosensitivity | 22210381 10.1016/j.canlet.2011.12.03 |
| negative Regulation: | L1CAM     | --- | chemosensitivity | 22472175 10.1158/1078-0432.CCR-11-27 |
| negative Regulation: | L1CAM     | --- | chemosensitivity | 22472175 10.1158/1078-0432.CCR-11-27 |
| negative Regulation: | L1CAM     | --- | chemosensitivity | 22472175 10.1158/1078-0432.CCR-11-27 |
| negative Regulation: | WFDC2     | --- | chemosensitivity | 10.31083/J.EJGO.2020.06.223          |
| negative Regulation: | DEPTOR    | --- | chemosensitivity | 28599191 10.1016/j.leukres.2017.06.0 |
| negative Regulation: | DEPTOR    | --- | chemosensitivity | 33184290 10.1038/s41419-020-03185-3  |
| negative Regulation: | DEPTOR    | --- | chemosensitivity | 23503641 10.3892/ijmm.2013.1299      |
| negative Regulation: | DEPTOR    | --- | chemosensitivity | 23503641 10.3892/ijmm.2013.1299      |
| negative Regulation: | DEPTOR    | --- | chemosensitivity | 23503641 10.3892/ijmm.2013.1299      |
| negative Regulation: | DEPTOR    | --- | chemosensitivity | 23503641 10.3892/ijmm.2013.1299      |
| negative Regulation: | DEPTOR    | --- | chemosensitivity | 23613505 10.1177/0300060513480920    |
| negative Regulation: | DEPTOR    | --- | chemosensitivity | 23613505 10.1177/0300060513480920    |
| negative Regulation: | DEPTOR    | --- | chemosensitivity | 23613505 10.1177/0300060513480920    |
| negative Regulation: | DEPTOR    | --- | chemosensitivity | 23503641 10.3892/ijmm.2013.129910.38 |
| negative Regulation: | DEPTOR    | --- | chemosensitivity | 23503641 10.3892/ijmm.2013.129910.38 |
| negative Regulation: | DEPTOR    | --- | chemosensitivity | 23503641 10.3892/ijmm.2013.129910.38 |
| negative Regulation: | DEPTOR    | --- | chemosensitivity | 33184290 10.1038/s41419-020-03185-31 |
| negative Regulation: | SNHG16    | --- | chemosensitivity | 33390845 10.7150/ijbs.50730          |
| negative Regulation: | MIR362    | --- | chemosensitivity | 33989708 10.1016/j.canlet.2021.05.00 |
| negative Regulation: | FURIN     | --- | chemosensitivity | 35917012 10.1245/s10434-022-11945-y  |
| negative Regulation: | EZH2      | --- | chemosensitivity | 27622325 10.1016/j.bbrc.2016.09.040  |
| negative Regulation: | EZH2      | --- | chemosensitivity | 27622325 10.1016/j.bbrc.2016.09.040  |
| negative Regulation: | EZH2      | --- | chemosensitivity | 29567536 10.1016/j.biopha.2018.03.07 |
| negative Regulation: | EZH2      | --- | chemosensitivity | 28196596 10.1016/j.ccell.2017.01.006 |
| negative Regulation: | EZH2      | --- | chemosensitivity | 33360300 10.1016/j.tranon.2020.10098 |
| negative Regulation: | EZH2      | --- | chemosensitivity | 33360300 10.1016/j.tranon.2020.10098 |
| negative Regulation: | EZH2      | --- | chemosensitivity | 28272374 10.3390/molecules22030417   |
| negative Regulation: | EZH2      | --- | chemosensitivity | 29035367 10.1038/nm.4415             |
| negative Regulation: | EZH2      | --- | chemosensitivity | 30786928 10.1186/s13046-019-1106-2   |
| negative Regulation: | EZH2      | --- | chemosensitivity | 33743723 10.1186/s12967-021-02789-3  |
| negative Regulation: | EZH2      | --- | chemosensitivity | 33743723 10.1186/s12967-021-02789-3  |
| negative Regulation: | EZH2      | --- | chemosensitivity | 23603558 10.1016/j.canlet.2013.04.01 |
| negative Regulation: | EZH2      | --- | chemosensitivity | 25400745                             |
| negative Regulation: | EZH2      | --- | chemosensitivity | 29221202 10.18632/oncotarget.2199610 |
| negative Regulation: | EZH2      | --- | chemosensitivity | 33240432 10.3892/ol.2020.1228710.389 |
| negative Regulation: | EZH2      | --- | chemosensitivity | 33240432 10.3892/ol.2020.1228710.389 |
| negative Regulation: | EZH2      | --- | chemosensitivity | 33240432 10.3892/ol.2020.1228710.389 |
| negative Regulation: | EZH2      | --- | chemosensitivity | 34904810 10.1097/PP0.000000000000055 |
| negative Regulation: | EZH2      | --- | chemosensitivity | 35216113 10.3390/ijms23042001        |
| negative Regulation: | PIK3CB    | --- | chemosensitivity | 22528234 10.1007/s11596-012-0049-z10 |
| negative Regulation: | FOXD2-AS1 | --- | chemosensitivity | 34873418 10.1155/2021/967476110.1155 |
| negative Regulation: | MCL1      | --- | chemosensitivity | 27847320 10.1016/j.bbrc.2016.11.049  |
| negative Regulation: | MCL1      | --- | chemosensitivity | 12787138 10.1046/j.1523-1747.2003.12 |
| negative Regulation: | MCL1      | --- | chemosensitivity | 23954445 10.1016/j.bbamcr.2013.08.00 |
| negative Regulation: | MCL1      | --- | chemosensitivity | 28343875 10.1016/j.bmcl.2017.03.028  |
| negative Regulation: | MCL1      | --- | chemosensitivity | 18601905 10.1016/j.bbrc.2008.06.098  |
| negative Regulation: | MCL1      | --- | chemosensitivity | 20004446 10.1016/j.surg.2009.10.033  |
| negative Regulation: | MCL1      | --- | chemosensitivity | 20004446 10.1016/j.surg.2009.10.033  |

|                      |          |     |                  |          |                             |
|----------------------|----------|-----|------------------|----------|-----------------------------|
| negative Regulation: | MCL1     | --- | chemosensitivity | 12787138 |                             |
| negative Regulation: | MCL1     | --- | chemosensitivity | 30221675 | 10.3892/ijo.2018.4557       |
| negative Regulation: | MCL1     | --- | chemosensitivity | 23257783 | 10.1038/leu.2012.367        |
| negative Regulation: | MCL1     | --- | chemosensitivity | 24223823 | 10.1371/journal.pone.007857 |
| negative Regulation: | MCL1     | --- | chemosensitivity | 24982331 |                             |
| negative Regulation: | MCL1     | --- | chemosensitivity | 18297287 | 10.1007/s00280-008-0697-710 |
| negative Regulation: | MCL1     | --- | chemosensitivity | 18297287 | 10.1007/s00280-008-0697-710 |
| negative Regulation: | MCL1     | --- | chemosensitivity | 18297287 | 10.1007/s00280-008-0697-710 |
| negative Regulation: | MCL1     | --- | chemosensitivity | 27049076 |                             |
| negative Regulation: | MCL1     | --- | chemosensitivity | 27686452 | 10.1007/s11010-016-2827-6   |
| negative Regulation: | MCL1     | --- | chemosensitivity | 31754782 | 10.1007/s00441-019-03105-81 |
| negative Regulation: | MCL1     | --- | chemosensitivity | 746      | 10.1016/j.bmcl.2017.03.028  |
| negative Regulation: | MCL1     | --- | chemosensitivity | 34781999 | 10.1186/s13046-021-02149-5  |
| negative Regulation: | MCL1     | --- | chemosensitivity | 35031927 | 10.1007/s11033-021-07040-2  |
| negative Regulation: | RECQL4   | --- | chemosensitivity | 26690729 | 10.1002/path.468110.1002/pa |
| negative Regulation: | PPFIA4   | --- | chemosensitivity | 32137820 | 10.1093/annonc/mdy303.054   |
| negative Regulation: | PPFIA4   | --- | chemosensitivity | 30842147 | 10.21873/anticancer.13227   |
| negative Regulation: | PPFIA4   | --- | chemosensitivity | 30842147 | 10.21873/anticancer.13227   |
| negative Regulation: | PPFIA4   | --- | chemosensitivity | 30842147 | 10.21873/anticancer.13227   |
| negative Regulation: | PPFIA4   | --- | chemosensitivity | 30842147 | 10.21873/anticancer.1322710 |
| negative Regulation: | IDO1     | --- | chemosensitivity | 25955018 | 10.1371/journal.pone.012615 |
| negative Regulation: | NR1I2    | --- | chemosensitivity | 27085140 | 10.1016/j.bbagr.2016.03.01  |
| negative Regulation: | NR1I2    | --- | chemosensitivity | 20691230 | 10.1016/j.addr.2010.07.008  |
| negative Regulation: | NR1I2    | --- | chemosensitivity | 26808161 | 10.1016/j.pharmthera.2016.0 |
| negative Regulation: | NR1I2    | --- | chemosensitivity | 23413096 |                             |
| negative Regulation: | DLEU1    | --- | chemosensitivity | 35152365 | 10.1007/s11010-022-04368-6  |
| negative Regulation: | TRIM28   | --- | chemosensitivity | 28381187 | 10.1177/1010428317695919    |
| negative Regulation: | TRIM28   | --- | chemosensitivity | 28381187 | 10.1177/1010428317695919    |
| negative Regulation: | TRIM28   | --- | chemosensitivity | 28381187 | 10.1177/1010428317695919    |
| negative Regulation: | SMG1     | --- | chemosensitivity | 25760059 | 10.3892/mmr.2015.3434       |
| negative Regulation: | SMG1     | --- | chemosensitivity | 25760059 | 10.3892/mmr.2015.3434       |
| negative Regulation: | TFEB     | --- | chemosensitivity | 28603284 | 10.1038/aps.2017.25         |
| negative Regulation: | SOX2     | --- | chemosensitivity | 31412296 | 10.1016/j.semcancer.2019.08 |
| negative Regulation: | SOX2     | --- | chemosensitivity | 30272330 | 10.3892/or.2018.6735        |
| negative Regulation: | SOX2     | --- | chemosensitivity | 30272330 | 10.3892/or.2018.6735        |
| negative Regulation: | SOX2     | --- | chemosensitivity | 30272330 | 10.3892/or.2018.6735        |
| negative Regulation: | SOX2     | --- | chemosensitivity | 30272330 | 10.3892/or.2018.6735        |
| negative Regulation: | SOX2     | --- | chemosensitivity | 32439916 | 10.1038/s41419-020-2540-y   |
| negative Regulation: | SOX2     | --- | chemosensitivity | 32439916 | 10.1038/s41419-020-2540-y   |
| negative Regulation: | SOX2     | --- | chemosensitivity | 33953166 | 10.1038/s41419-021-03733-5  |
| negative Regulation: | SOX2     | --- | chemosensitivity | 22732500 | 10.4161/cc.21021            |
| negative Regulation: | SOX2     | --- | chemosensitivity | 26499463 | 10.1186/s12885-015-1826-4   |
| negative Regulation: | SOX2     | --- | chemosensitivity | 30272330 | 10.3892/or.2018.673510.3892 |
| negative Regulation: | SOX2     | --- | chemosensitivity |          |                             |
| negative Regulation: | MIR155HG | --- | chemosensitivity | 32529543 | 10.1007/s10571-020-00898-z  |
| negative Regulation: | EGR1     | --- | chemosensitivity | 23178451 | 10.1016/j.canlet.2012.11.00 |
| negative Regulation: | EGR1     | --- | chemosensitivity | 23478574 | 10.1016/j.biopha.2013.01.00 |
| negative Regulation: | EGR1     | --- | chemosensitivity | 23478574 | 10.1016/j.biopha.2013.01.00 |
| negative Regulation: | EGR1     | --- | chemosensitivity | 24704156 | 10.1016/j.canlet.2014.03.02 |
| negative Regulation: | EGR1     | --- | chemosensitivity | 26708617 | 10.1016/j.yexcr.2015.12.006 |
| negative Regulation: | EGR1     | --- | chemosensitivity |          |                             |
| negative Regulation: | IFI30    | --- | chemosensitivity | 34252711 | 10.1016/j.tranon.2021.10115 |
| negative Regulation: | IFI30    | --- | chemosensitivity | 34400904 | 10.7150/IJMS.62870          |
| negative Regulation: | RRM2     | --- | chemosensitivity | 29275122 | 10.1016/j.biomaterials.2017 |



|                                                    |          |                              |
|----------------------------------------------------|----------|------------------------------|
| negative Regulation: TYMS ---  chemosensitivity    | 12084459 | 10.1016/S0925-4439(02)00080  |
| negative Regulation: TYMS ---  chemosensitivity    | 12084459 | 10.1016/S0925-4439(02)00080  |
| negative Regulation: TYMS ---  chemosensitivity    | 15737843 | 10.1016/j.jamcollsurg.2004.  |
| negative Regulation: TYMS ---  chemosensitivity    | 18187583 |                              |
| negative Regulation: TYMS ---  chemosensitivity    | 21380490 | 10.3892/or.2011.1206         |
| negative Regulation: TYMS ---  chemosensitivity    | 21362378 | 10.3760/cma.j.issn.0366-699  |
| negative Regulation: TYMS ---  chemosensitivity    | 21362378 | 10.3760/cma.j.issn.0366-699  |
| negative Regulation: TYMS ---  chemosensitivity    | 25482885 | 10.3892/or.2014.3646         |
| negative Regulation: TYMS ---  chemosensitivity    | 25482885 | 10.3892/or.2014.3646         |
| negative Regulation: TYMS ---  chemosensitivity    | 27098147 | 10.3727/096504016X145627253  |
| negative Regulation: TYMS ---  chemosensitivity    | 18187583 | 10.1124/mol.107.04238210.11  |
| negative Regulation: TYMS ---  chemosensitivity    | 28521444 | 10.3892/ol.2017.589510.3892  |
| negative Regulation: TYMS ---  chemosensitivity    | 35586209 | 10.1155/2022/3249766         |
| negative Regulation: MIF ---  chemosensitivity     | 32893526 | 10.1631/jzus.B2000076        |
| negative Regulation: MIF ---  chemosensitivity     | 25101674 | 10.1038/cddis.2014.300       |
| negative Regulation: MIF ---  chemosensitivity     | 22430150 | 10.1038/cr.2012.4410.1038/c  |
| negative Regulation: NUAK1 ---  chemosensitivity   | 28469776 |                              |
| negative Regulation: NUAK1 ---  chemosensitivity   | 28469776 |                              |
| negative Regulation: CDKL1 ---  chemosensitivity   | 30802495 | 10.1016/j.mcp.2019.02.00410  |
| negative Regulation: HMGCR ---  chemosensitivity   | 17158228 | 10.1182/blood-2006-08-04444  |
| negative Regulation: TRPM2 ---  chemosensitivity   | 30942446 | 10.3892/or.2019.7095         |
| negative Regulation: TRPM2 ---  chemosensitivity   | 35089473 | 10.1007/s10495-022-01709-0   |
| negative Regulation: OGT ---  chemosensitivity     | 30453909 | 10.1186/s12885-018-5033-y    |
| negative Regulation: OGT ---  chemosensitivity     | 30453909 | 10.1186/s12885-018-5033-y    |
| negative Regulation: PPP1R7 ---  chemosensitivity  | 27685628 | 10.1038/cddis.2016.289       |
| negative Regulation: PPP1R7 ---  chemosensitivity  | 27685628 | 10.1038/cddis.2016.28910.10  |
| negative Regulation: TRIM62 ---  chemosensitivity  | 35469851 | 10.1016/j.taap.2022.1160351  |
| negative Regulation: ID4 ---  chemosensitivity     | 27537399 | 10.1097/CAD.000000000000041  |
| negative Regulation: ID4 ---  chemosensitivity     | 27537399 | 10.1097/CAD.000000000000041  |
| negative Regulation: ID4 ---  chemosensitivity     | 33993270 | 10.1093/carcin/bgab03710.10  |
| negative Regulation: SSRP1 ---  chemosensitivity   | 27525970 | 10.1016/j.biopha.2016.08.02  |
| negative Regulation: MIR10A ---  chemosensitivity  | 32786108 | 10.1002/jcb.2983310.1002/jc  |
| negative Regulation: MIR10A ---  chemosensitivity  | 35863089 | 10.1016/j.bbrc.2022.07.017   |
| negative Regulation: DPP9 ---  chemosensitivity    | 32734369 | 10.1245/s10434-020-08729-7   |
| negative Regulation: DPP9 ---  chemosensitivity    | 32734369 | 10.1245/s10434-020-08729-7   |
| negative Regulation: HSPA4L ---  chemosensitivity  | 31899217 | 10.1016/j.expchem.2019.12.00 |
| negative Regulation: COIL ---  chemosensitivity    | 30065619 | 10.1186/s12935-018-0600-5    |
| negative Regulation: COIL ---  chemosensitivity    | 35151311 | 10.1186/s12964-022-00820-8   |
| negative Regulation: MEN1 ---  chemosensitivity    | 34711954 | 10.1038/s41388-021-02039-2   |
| negative Regulation: JOSD1 ---  chemosensitivity   | 34261480 | 10.1186/s12935-021-02060-1   |
| negative Regulation: JOSD1 ---  chemosensitivity   | 34261480 | 10.1186/s12935-021-02060-11  |
| negative Regulation: EIF2S1 ---  chemosensitivity  | 29957018 | 10.1089/cbr.2018.2447        |
| negative Regulation: SOX4 ---  chemosensitivity    | 28780934 | 10.1016/j.trecan.2017.06.00  |
| negative Regulation: SOX4 ---  chemosensitivity    | 26555193 | 10.1186/s12885-015-1875-8    |
| negative Regulation: PAK6 ---  chemosensitivity    |          | 10.1016/j.juro.2011.02.501   |
| negative Regulation: PAK6 ---  chemosensitivity    | 28687498 | 10.1016/j.ebiom.2017.06.028  |
| negative Regulation: PAK6 ---  chemosensitivity    | 28688823 | 10.1016/j.ebiom.2017.07.003  |
| negative Regulation: PAK6 ---  chemosensitivity    |          | 10.1016/j.juro.2010.02.455   |
| negative Regulation: PAK6 ---  chemosensitivity    | 26459798 | 10.3892/mmr.2015.4390        |
| negative Regulation: PAK6 ---  chemosensitivity    | 19362342 | 10.1016/j.urology.2008.09.0  |
| negative Regulation: PAK6 ---  chemosensitivity    | 19362342 | 10.1016/j.urology.2008.09.0  |
| negative Regulation: PAK6 ---  chemosensitivity    | 35902562 | 10.1038/s41419-022-05118-8   |
| negative Regulation: MIR3136 ---  chemosensitivity | 30425571 | 10.2147/CMAR.S17272210.2147  |
| negative Regulation: STAB1 ---  chemosensitivity   | 28631095 | 10.1007/s10637-017-0477-5    |



|          |             |           |      |                  |          |                             |
|----------|-------------|-----------|------|------------------|----------|-----------------------------|
| negative | Regulation: | KCNJ2     | ---- | chemosensitivity | 33892053 | 10.1016/j.bbcan.2021.188552 |
| negative | Regulation: | WNT2B     | ---- | chemosensitivity | 31985024 | 10.3892/ijmm.2020.4474      |
| negative | Regulation: | MAPK14    | ---- | chemosensitivity | 28916425 | 10.1016/j.prp.2017.08.003   |
| negative | Regulation: | MAPK14    | ---- | chemosensitivity | 23920402 | 10.1016/j.ejca.2013.07.015  |
| negative | Regulation: | MAPK14    | ---- | chemosensitivity | 24333738 | 10.1016/j.canlet.2013.11.01 |
| negative | Regulation: | MAPK14    | ---- | chemosensitivity | 19435873 | 10.1158/1535-7163.MCT-08-09 |
| negative | Regulation: | MAPK14    | ---- | chemosensitivity |          |                             |
| negative | Regulation: | ALOX12    | ---- | chemosensitivity | 31014671 | 10.1016/j.bbrc.2019.04.101  |
| negative | Regulation: | ALOX12    | ---- | chemosensitivity |          | 10.1016/j.bbrc.2019.04.101  |
| negative | Regulation: | YEATS4    | ---- | chemosensitivity | 30662802 |                             |
| negative | Regulation: | PINK1     | ---- | chemosensitivity | 29022200 | 10.1245/s10434-017-6096-8   |
| negative | Regulation: | CTSK      | ---- | chemosensitivity | 31901727 | 10.1016/j.redox.2019.101422 |
| negative | Regulation: | LINC00680 | ---- | chemosensitivity | 33499874 | 10.1186/s13046-021-01854-5  |
| negative | Regulation: | LINC00680 | ---- | chemosensitivity | 33499874 | 10.1186/s13046-021-01854-5  |
| negative | Regulation: | LINC00680 | ---- | chemosensitivity | 33499874 | 10.1186/s13046-021-01854-51 |
| negative | Regulation: | WDR5      | ---- | chemosensitivity | 33257682 | 10.1038/s41419-020-03231-0  |
| negative | Regulation: | WDR5      | ---- | chemosensitivity | 34154613 | 10.1186/s13046-021-01989-51 |
| negative | Regulation: | WDR5      | ---- | chemosensitivity | 33754029 | 10.7150/thno.5581410.7150/t |
| negative | Regulation: | WDR5      | ---- | chemosensitivity | 33754029 | 10.7150/thno.5581410.7150/t |
| negative | Regulation: | WDR5      | ---- | chemosensitivity | 34154613 | 10.1186/s13046-021-01989-51 |
| negative | Regulation: | WDR5      | ---- | chemosensitivity | 34154613 | 10.1186/s13046-021-01989-5  |
| negative | Regulation: | WDR5      | ---- | chemosensitivity | 34154613 | 10.1186/s13046-021-01989-5  |
| negative | Regulation: | WDR5      | ---- | chemosensitivity | 34830196 | 10.3390/ijms22212314        |
| negative | Regulation: | AXL       | ---- | chemosensitivity | 29496493 | 10.1016/j.lfs.2018.02.033   |
| negative | Regulation: | AXL       | ---- | chemosensitivity | 24184575 | 10.1016/j.brainres.2013.10. |
| negative | Regulation: | AXL       | ---- | chemosensitivity | 27558819 | 10.1007/978-3-319-39406-0_5 |
| negative | Regulation: | AXL       | ---- | chemosensitivity | 27558819 | 10.1007/978-3-319-39406-0_5 |
| negative | Regulation: | AXL       | ---- | chemosensitivity | 27712586 | 10.3727/096504016X146487014 |
| negative | Regulation: | AXL       | ---- | chemosensitivity | 28468579 | 10.1177/1010428317699796    |
| negative | Regulation: | AXL       | ---- | chemosensitivity | 31243646 | 10.1007/s12272-019-01169-2  |
| negative | Regulation: | AXL       | ---- | chemosensitivity | 22890323 | 10.1038/onc.2012.355        |
| negative | Regulation: | AXL       | ---- | chemosensitivity | 22890323 | 10.1038/onc.2012.355        |
| negative | Regulation: | AXL       | ---- | chemosensitivity | 22890323 | 10.1038/onc.2012.355        |
| negative | Regulation: | AXL       | ---- | chemosensitivity |          |                             |
| negative | Regulation: | AXL       | ---- | chemosensitivity | 20423999 | 10.1158/1535-7163.MCT-09-07 |
| negative | Regulation: | AXL       | ---- | chemosensitivity | 22890323 | 10.1038/onc.2012.35510.1038 |
| negative | Regulation: | AXL       | ---- | chemosensitivity | 22890323 | 10.1038/onc.2012.35510.1038 |
| negative | Regulation: | AXL       | ---- | chemosensitivity | 24984960 | 10.1002/iub.128510.1002/iub |
| negative | Regulation: | AXL       | ---- | chemosensitivity | 25596315 | 10.1016/j.bbrc.2015.01.0171 |
| negative | Regulation: | AXL       | ---- | chemosensitivity | 35708914 | 10.1172/JCI150517           |
| negative | Regulation: | CCR2      | ---- | chemosensitivity | 28971904 | 10.3324/haematol.2016.15720 |
| negative | Regulation: | APEX1     | ---- | chemosensitivity | 32641008 | 10.1186/s12885-020-07111-w  |
| negative | Regulation: | APEX1     | ---- | chemosensitivity | 34006852 | 10.1038/s41419-021-03804-7  |
| negative | Regulation: | APEX1     | ---- | chemosensitivity | 22788765 | 10.2174/092986712802002509  |
| negative | Regulation: | APEX1     | ---- | chemosensitivity | 23418439 | 10.1371/journal.pone.005531 |
| negative | Regulation: | APEX1     | ---- | chemosensitivity |          |                             |
| negative | Regulation: | YWHAZ     | ---- | chemosensitivity | 25770209 | 10.1074/jbc.M114.607580     |
| negative | Regulation: | YWHAZ     | ---- | chemosensitivity | 21334806 | 10.1016/j.canlet.2011.01.01 |
| negative | Regulation: | YWHAZ     | ---- | chemosensitivity | 24556826 | 10.1038/emm.2013.151        |
| negative | Regulation: | YWHAZ     | ---- | chemosensitivity | 24603438 | 10.1159/000357377           |
| negative | Regulation: | YWHAZ     | ---- | chemosensitivity | 24603438 | 10.1159/000357377           |
| negative | Regulation: | YWHAZ     | ---- | chemosensitivity | 24603438 | 10.1159/000357377           |
| negative | Regulation: | YWHAZ     | ---- | chemosensitivity | 25770209 | 10.1074/jbc.M114.607580     |
| negative | Regulation: | YWHAZ     | ---- | chemosensitivity | 21334806 | 10.1016/j.canlet.2011.01.01 |

|          |             |              |     |                  |          |                             |
|----------|-------------|--------------|-----|------------------|----------|-----------------------------|
| negative | Regulation: | YWHAZ        | --- | chemosensitivity | 29387222 | 10.3892/o1.2017.732610.3892 |
| negative | Regulation: | YWHAZ        | --- | chemosensitivity |          | 10.1074/jbc.M114.607580     |
| negative | Regulation: | UBE2V1       | --- | chemosensitivity | 31827405 | 10.1186/s12935-019-1050-4   |
| negative | Regulation: | UBE2V1       | --- | chemosensitivity | 31827405 | 10.1186/s12935-019-1050-410 |
| negative | Regulation: | VTRNA2-1     | --- | chemosensitivity | 31966795 |                             |
| negative | Regulation: | ATG16L1      | --- | chemosensitivity | 30320370 | 10.3892/ijo.2018.4593       |
| negative | Regulation: | RAD18        | --- | chemosensitivity | 32356270 | 10.1245/s10434-020-08518-2  |
| negative | Regulation: | RAD18        | --- | chemosensitivity | 32356270 | 10.1245/s10434-020-08518-2  |
| negative | Regulation: | RAD18        | --- | chemosensitivity | 32356270 | 10.1245/s10434-020-08518-21 |
| negative | Regulation: | RER1         | --- | chemosensitivity | 32380129 | 10.1016/j.canlet.2020.04.01 |
| negative | Regulation: | MIR452       | --- | chemosensitivity | 33658394 | 10.18632/aging.202657       |
| negative | Regulation: | MIR452       | --- | chemosensitivity | 33658394 | 10.18632/aging.202657       |
| negative | Regulation: | COPS6        | --- | chemosensitivity | 36512632 | 10.1158/0008-5472.CAN-22-21 |
| negative | Regulation: | LDHA         | --- | chemosensitivity | 26454069 | 10.1016/j.semcancer.2015.10 |
| negative | Regulation: | LDHA         | --- | chemosensitivity | 34131808 | 10.1007/s00018-021-03866-y  |
| negative | Regulation: | LDHA         | --- | chemosensitivity | 24178759 | 10.1038/bjc.2013.681        |
| negative | Regulation: | LDHA         | --- | chemosensitivity | 35191522 | 10.3892/OR.2022.8288        |
| negative | Regulation: | IFRD1        | --- | chemosensitivity | 33524870 | 10.1016/j.bbrc.2021.01.029  |
| negative | Regulation: | IFRD1        | --- | chemosensitivity | 33524870 | 10.1016/j.bbrc.2021.01.029  |
| negative | Regulation: | IFRD1        | --- | chemosensitivity | 33524870 | 10.1016/j.bbrc.2021.01.029  |
| negative | Regulation: | IFRD1        | --- | chemosensitivity | 33524870 | 10.1016/j.bbrc.2021.01.029  |
| negative | Regulation: | LOC112543491 | --- | chemosensitivity | 27195675 | 10.1038/cddis.2016.124      |
| negative | Regulation: | KCNQ10T1     | --- | chemosensitivity | 31676070 | 10.1016/j.bbrc.2019.10.136  |
| negative | Regulation: | KCNQ10T1     | --- | chemosensitivity | 31706574 | 10.1016/j.bbrc.2019.10.180  |
| negative | Regulation: | KCNQ10T1     | --- | chemosensitivity | 31454677 | 10.1016/j.omtn.2019.06.010  |
| negative | Regulation: | KCNQ10T1     | --- | chemosensitivity | 31454677 | 10.1016/j.omtn.2019.06.010  |
| negative | Regulation: | KCNQ10T1     | --- | chemosensitivity | 29970910 | 10.1038/s41419-018-0793-5   |
| negative | Regulation: | KCNQ10T1     | --- | chemosensitivity | 33576460 | 10.3892/ijmm.2021.488710.38 |
| negative | Regulation: | KCNQ10T1     | --- | chemosensitivity | 33705625 | 10.4143/crt.2020.1208       |
| negative | Regulation: | KCNQ10T1     | --- | chemosensitivity | 35540579 | 10.1039/c9ra06378a10.1039/c |
| negative | Regulation: | MIR25        | --- | chemosensitivity | 29596304 | 10.3390/molecules23040787   |
| negative | Regulation: | MIR25        | --- | chemosensitivity | 25945419 | 10.1080/15384047.2015.10409 |
| negative | Regulation: | MIR25        | --- | chemosensitivity |          |                             |
| negative | Regulation: | PATJ         | --- | chemosensitivity | 33169673 | 10.1016/j.ygeno.2020.10.016 |
| negative | Regulation: | COX5A        | --- | chemosensitivity | 32758616 | 10.1016/j.canlet.2020.07.02 |
| negative | Regulation: | CLEC3A       | --- | chemosensitivity | 32319617 | 10.3892/mmr.2020.10986      |
| negative | Regulation: | CLEC3A       | --- | chemosensitivity | 32319617 | 10.3892/mmr.2020.10986      |
| negative | Regulation: | CLEC3A       | --- | chemosensitivity | 32319617 | 10.3892/mmr.2020.10986      |
| negative | Regulation: | CLEC3A       | --- | chemosensitivity | 32319617 | 10.3892/mmr.2020.10986      |
| negative | Regulation: | CLEC3A       | --- | chemosensitivity | 32319617 | 10.3892/mmr.2020.1098610.38 |
| negative | Regulation: | ITGA6        | --- | chemosensitivity | 26742943 | 10.1016/j.jconrel.2015.12.C |
| negative | Regulation: | ARHGDI1      | --- | chemosensitivity | 22668020 | 10.4149/neo_2012_07010.4149 |
| negative | Regulation: | MIR134       | --- | chemosensitivity | 33892053 | 10.1016/j.bbcan.2021.188552 |
| negative | Regulation: | MIR134       | --- | chemosensitivity | 27685628 | 10.1038/cddis.2016.289      |
| negative | Regulation: | MIR134       | --- | chemosensitivity | 28325280 | 10.1016/j.omtn.2016.11.003  |
| negative | Regulation: | MIR134       | --- | chemosensitivity | 31689617 | 10.1016/j.omtn.2019.09.025  |
| negative | Regulation: | MIR134       | --- | chemosensitivity | 27685628 | 10.1038/cddis.2016.289      |
| negative | Regulation: | MIR134       | --- | chemosensitivity | 27685628 | 10.1038/cddis.2016.289      |
| negative | Regulation: | MIR134       | --- | chemosensitivity | 27685628 | 10.1038/cddis.2016.289      |
| negative | Regulation: | MIR134       | --- | chemosensitivity | 27685628 | 10.1038/cddis.2016.289      |
| negative | Regulation: | MIR134       | --- | chemosensitivity | 27685628 | 10.1038/cddis.2016.289      |
| negative | Regulation: | MIR134       | --- | chemosensitivity | 27685628 | 10.1038/cddis.2016.289      |
| negative | Regulation: | MIR134       | --- | chemosensitivity | 33621196 | 10.18632/aging.202538       |
| negative | Regulation: | MIR134       | --- | chemosensitivity | 33621196 | 10.18632/aging.202538       |
| negative | Regulation: | MIR134       | --- | chemosensitivity | 27685628 | 10.1038/cddis.2016.28910.10 |

|          |             |         |      |                  |          |                             |
|----------|-------------|---------|------|------------------|----------|-----------------------------|
| negative | Regulation: | DICER1  | ---  | chemosensitivity | 30336979 | 10.1016/j.bbrc.2018.10.071  |
| negative | Regulation: | DICER1  | ---  | chemosensitivity | 25115815 | 10.1186/1476-4598-13-190    |
| negative | Regulation: | DICER1  | ---  | chemosensitivity | 25115815 | 10.1186/1476-4598-13-190    |
| negative | Regulation: | DICER1  | ---  | chemosensitivity | 25115815 | 10.1186/1476-4598-13-190    |
| negative | Regulation: | DICER1  | ---  | chemosensitivity | 25115815 | 10.1186/1476-4598-13-19010. |
| negative | Regulation: | DICER1  | ---  | chemosensitivity | 28911000 | 10.1093/carcin/bgx05910.109 |
| negative | Regulation: | DDX27   | ---- | chemosensitivity | 36551703 | 10.3390/cancers14246218     |
| negative | Regulation: | CHCHD6  | ---  | chemosensitivity | 22228767 | 10.1074/jbc.M111.277103     |
| negative | Regulation: | CHCHD6  | ---  | chemosensitivity | 22228767 | 10.1074/jbc.M111.277103     |
| negative | Regulation: | CHCHD6  | ---  | chemosensitivity | 27479602 | 10.1371/journal.pone.016025 |
| negative | Regulation: | CHCHD6  | ---  | chemosensitivity | 22228767 | 10.1074/jbc.M111.277103     |
| negative | Regulation: | CHCHD6  | ---  | chemosensitivity | 22228767 | 10.1074/jbc.M111.277103     |
| negative | Regulation: | CHCHD6  | ---  | chemosensitivity | 22228767 | 10.1074/jbc.M111.277103     |
| negative | Regulation: | CHCHD6  | ---  | chemosensitivity | 22228767 | 10.1074/jbc.M111.277103     |
| negative | Regulation: | CHCHD6  | ---- | chemosensitivity | 22228767 | 10.1074/jbc.M111.27710310.1 |
| negative | Regulation: | CREBBP  | ---  | chemosensitivity | 34149923 | 10.7150/jca.5613510.7150/jc |
| negative | Regulation: | CREBBP  | ---  | chemosensitivity | 34149923 | 10.7150/jca.5613510.7150/jc |
| negative | Regulation: | CREBBP  | ---  | chemosensitivity | 34812991 | 10.1007/s12032-021-01610-x  |
| negative | Regulation: | ST8SIA4 | ---- | chemosensitivity | 22579717 | 10.1016/j.biocel.2012.04.02 |
| negative | Regulation: | MET     | ---  | chemosensitivity | 28939129 | 10.1016/j.jphs.2017.06.006  |
| negative | Regulation: | MET     | ---  | chemosensitivity | 22820099 | 10.1016/j.abb.2012.07.003   |
| negative | Regulation: | MET     | ---  | chemosensitivity | 22820099 | 10.1016/j.abb.2012.07.003   |
| negative | Regulation: | MET     | ---  | chemosensitivity | 22820099 | 10.1016/j.abb.2012.07.003   |
| negative | Regulation: | MET     | ---  | chemosensitivity | 24835851 | 10.1016/j.oraloncology.2014 |
| negative | Regulation: | MET     | ---  | chemosensitivity | 33300049 | 10.3892/ijo.2020.5127       |
| negative | Regulation: | MET     | ---  | chemosensitivity | 33213473 | 10.1186/s12967-020-02613-4  |
| negative | Regulation: | MET     | ---  | chemosensitivity | 33526881 | 10.1038/s41388-020-01577-5  |
| negative | Regulation: | MET     | ---  | chemosensitivity | 33846781 | 10.3892/IJO.2021.5208       |
| negative | Regulation: | MET     | ---  | chemosensitivity | 21468575 | 10.3892/mmr.2011.426        |
| negative | Regulation: | MET     | ---  | chemosensitivity | 23613505 | 10.1177/0300060513480920    |
| negative | Regulation: | MET     | ---  | chemosensitivity | 25873032 | 10.1038/ncomms7776          |
| negative | Regulation: | MET     | ---  | chemosensitivity | 21468575 | 10.3892/mmr.2011.42610.3892 |
| negative | Regulation: | MET     | ---  | chemosensitivity | 21468575 | 10.3892/mmr.2011.42610.3892 |
| negative | Regulation: | MET     | ---  | chemosensitivity | 21468575 | 10.3892/mmr.2011.42610.3892 |
| negative | Regulation: | MET     | ---  | chemosensitivity | 22820099 | 10.1016/j.abb.2012.07.00310 |
| negative | Regulation: | MET     | ---  | chemosensitivity | 24835851 | 10.1016/j.oraloncology.2014 |
| negative | Regulation: | MET     | ---  | chemosensitivity | 27658187 | 10.1111/1440-1681.1267210.1 |
| negative | Regulation: | MET     | ---  | chemosensitivity | 33441071 | 10.2174/1570159X19666210113 |
| negative | Regulation: | MET     | ---  | chemosensitivity | 36283555 | 10.1016/j.ijbiomac.2022.10. |
| negative | Regulation: | SCD     | ---  | chemosensitivity | 22922095 | 10.1016/j.mce.2012.08.005   |
| negative | Regulation: | PRKD2   | ---  | chemosensitivity | 24665648 |                             |
| negative | Regulation: | PCID2   | ---  | chemosensitivity | 34031538 | 10.1038/s41374-021-00613-6  |
| negative | Regulation: | PCID2   | ---  | chemosensitivity | 34031538 | 10.1038/s41374-021-00613-6  |
| negative | Regulation: | PCID2   | ---  | chemosensitivity | 34031538 | 10.1038/s41374-021-00613-6  |
| negative | Regulation: | PCID2   | ---  | chemosensitivity | 34031538 | 10.1038/s41374-021-00613-6  |
| negative | Regulation: | STAT5B  | ---- | chemosensitivity | 25997700 | 10.3892/or.2015.3994        |
| negative | Regulation: | STAT5B  | ---- | chemosensitivity | 27035235 | 10.3892/or.2016.4727        |
| negative | Regulation: | STAT5B  | ---- | chemosensitivity | 25997700 | 10.3892/or.2015.3994        |
| negative | Regulation: | STAT5B  | ---- | chemosensitivity | 25997700 | 10.3892/or.2015.3994        |
| negative | Regulation: | STAT5B  | ---- | chemosensitivity | 25997700 | 10.3892/or.2015.3994        |
| negative | Regulation: | STAT5B  | ---- | chemosensitivity | 25997700 | 10.3892/or.2015.3994        |
| negative | Regulation: | STAT5B  | ---- | chemosensitivity | 25997700 | 10.3892/or.2015.399410.3892 |
| negative | Regulation: | STAT5B  | ---- | chemosensitivity | 25997700 | 10.3892/or.2015.399410.3892 |
| negative | Regulation: | STAT5B  | ---- | chemosensitivity | 25997700 | 10.3892/or.2015.399410.3892 |

|          |             |        |      |                  |          |                             |
|----------|-------------|--------|------|------------------|----------|-----------------------------|
| negative | Regulation: | STMN1  | ---- | chemosensitivity | 18162179 | 10.1016/j.bbrc.2007.12.107  |
| negative | Regulation: | STMN1  | ---- | chemosensitivity | 12480194 | 10.1016/S0169-5002(02)00171 |
| negative | Regulation: | STMN1  | ---- | chemosensitivity | 26802649 | 10.3727/096504015X144525634 |
| negative | Regulation: | STMN1  | ---- | chemosensitivity | 26802649 | 10.3727/096504015X144525634 |
| negative | Regulation: | STMN1  | ---- | chemosensitivity | 29059154 | 10.1038/onc.2017.373        |
| negative | Regulation: | STMN1  | ---- | chemosensitivity | 30169496 | 10.12659/MSM.910953         |
| negative | Regulation: | STMN1  | ---- | chemosensitivity | 30616477 | 10.1177/0300060518819606    |
| negative | Regulation: | STMN1  | ---- | chemosensitivity | 30422880 | 10.1097/CMR.000000000000055 |
| negative | Regulation: | STMN1  | ---- | chemosensitivity | 32377743 | 10.3892/or.2020.7601        |
| negative | Regulation: | STMN1  | ---- | chemosensitivity | 21546534 | 10.1167/iov.10-6973         |
| negative | Regulation: | STMN1  | ---- | chemosensitivity | 26782519 | 10.4238/2015.December.28.18 |
| negative | Regulation: | STMN1  | ---- | chemosensitivity | 21546534 | 10.1167/iov.10-697310.1167  |
| negative | Regulation: | STMN1  | ---- | chemosensitivity | 26802649 | 10.3727/096504015X144525634 |
| negative | Regulation: | STMN1  | ---- | chemosensitivity | 29021019 | 10.3727/096504015X144525634 |
| negative | Regulation: | STMN1  | ---- | chemosensitivity | 35186166 | 10.1155/2022/3554100        |
| negative | Regulation: | HSF1   | ---- | chemosensitivity | 35158144 | 10.1016/j.biopha.2022.11271 |
| negative | Regulation: | RABL6  | ---- | chemosensitivity | 30197676 | 10.3892/ol.2018.920510.3892 |
| negative | Regulation: | HSPB1  | ---- | chemosensitivity | 28012700 | 10.1016/j.tips.2016.11.009  |
| negative | Regulation: | HSPB1  | ---- | chemosensitivity | 20833165 | 10.1016/j.yexcr.2010.08.014 |
| negative | Regulation: | HSPB1  | ---- | chemosensitivity |          | 10.1016/j.ddstr.2008.02.007 |
| negative | Regulation: | HSPB1  | ---- | chemosensitivity | 22498886 | 10.1016/j.jprot.2012.03.046 |
| negative | Regulation: | HSPB1  | ---- | chemosensitivity | 26056726 | 10.1016/j.biomaterials.2015 |
| negative | Regulation: | HSPB1  | ---- | chemosensitivity | 26877709 | 10.1186/s12935-016-0283-8   |
| negative | Regulation: | HSPB1  | ---- | chemosensitivity | 31052354 | 10.3390/molecules24091700   |
| negative | Regulation: | HSPB1  | ---- | chemosensitivity |          |                             |
| negative | Regulation: | HSPB1  | ---- | chemosensitivity | 23404246 | 10.3892/or.2013.2274        |
| negative | Regulation: | HSPB1  | ---- | chemosensitivity | 21472339 | 10.3892/mmr.2010.372        |
| negative | Regulation: | HSPB1  | ---- | chemosensitivity | 22027750 | 10.1097/IGC.0b013e31822491d |
| negative | Regulation: | HSPB1  | ---- | chemosensitivity | 24902789 | 10.1038/aps.2014.22         |
| negative | Regulation: | HSPB1  | ---- | chemosensitivity | 25502518 | 10.1371/journal.pone.011415 |
| negative | Regulation: | HSPB1  | ---- | chemosensitivity | 26931434 | 10.3727/096504015X144969329 |
| negative | Regulation: | HSPB1  | ---- | chemosensitivity | 26928556 | 10.1186/s13048-015-0210-y   |
| negative | Regulation: | HSPB1  | ---- | chemosensitivity | 16525997 | 10.1002/pmic.200402031      |
| negative | Regulation: | HSPB1  | ---- | chemosensitivity | 17524270 |                             |
| negative | Regulation: | HSPB1  | ---- | chemosensitivity | 18758817 | 10.1007/s00432-008-0460-910 |
| negative | Regulation: | HSPB1  | ---- | chemosensitivity | 19575256 | 10.1007/s00292-009-1147-y10 |
| negative | Regulation: | HSPB1  | ---- | chemosensitivity | 19625496 | 10.1158/1535-7163.MCT-09-01 |
| negative | Regulation: | HSPB1  | ---- | chemosensitivity | 26805817 | 10.3390/ijs1701013710.3390  |
| negative | Regulation: | HSPB1  | ---- | chemosensitivity | 29487706 | 10.18632/oncotarget.2409110 |
| negative | Regulation: | HSPB1  | ---- | chemosensitivity | 30471115 | 10.1002/jcp.2766610.1002/jc |
| negative | Regulation: | HSPB1  | ---- | chemosensitivity | 30651868 | 10.3892/etm.2018.704010.389 |
| negative | Regulation: | HSPB1  | ---- | chemosensitivity | 36012138 | 10.3390/ijs23168875         |
| negative | Regulation: | TM4SF1 | ---- | chemosensitivity | 31142317 | 10.1186/s12931-019-1071-5   |
| negative | Regulation: | TM4SF1 | ---- | chemosensitivity | 31142317 | 10.1186/s12931-019-1071-5   |
| negative | Regulation: | TM4SF1 | ---- | chemosensitivity | 31142317 | 10.1186/s12931-019-1071-5   |
| negative | Regulation: | TM4SF1 | ---- | chemosensitivity | 31142317 | 10.1186/s12931-019-1071-5   |
| negative | Regulation: | TM4SF1 | ---- | chemosensitivity | 31142317 | 10.1186/s12931-019-1071-5   |
| negative | Regulation: | TM4SF1 | ---- | chemosensitivity | 31142317 | 10.1186/s12931-019-1071-510 |
| negative | Regulation: | FGFR4  | ---- | chemosensitivity | 29763898 | 10.1159/000489759           |
| negative | Regulation: | FGFR4  | ---- | chemosensitivity | 22508544 | 10.1530/ERC-12-0060         |
| negative | Regulation: | FGFR4  | ---- | chemosensitivity | 29763898 | 10.1159/00048975910.1159/00 |
| negative | Regulation: | FGFR4  | ---- | chemosensitivity |          |                             |
| negative | Regulation: | WTAP   | ---- | chemosensitivity | 30851419 | 10.1016/j.canlet.2019.02.04 |
| negative | Regulation: | WTAP   | ---- | chemosensitivity | 30851419 | 10.1016/j.canlet.2019.02.04 |

|          |             |         |     |                  |          |                             |
|----------|-------------|---------|-----|------------------|----------|-----------------------------|
| negative | Regulation: | WTAP    | --- | chemosensitivity | 34081626 | 10.18632/aging.203062       |
| negative | Regulation: | WTAP    | --- | chemosensitivity | 30851419 | 10.1016/j.canlet.2019.02.04 |
| negative | Regulation: | WTAP    | --- | chemosensitivity | 35090469 | 10.1186/s12943-022-01508-w  |
| negative | Regulation: | WTAP    | --- | chemosensitivity | 36517820 | 10.1186/s12943-022-01680-z  |
| negative | Regulation: | HIF1A   | --- | chemosensitivity | 32278855 | 10.1016/j.ejphar.2020.17310 |
| negative | Regulation: | HIF1A   | --- | chemosensitivity | 27090014 | 10.1016/j.yexcr.2016.04.011 |
| negative | Regulation: | HIF1A   | --- | chemosensitivity | 29782974 | 10.1016/j.ijbiomac.2018.05. |
| negative | Regulation: | HIF1A   | --- | chemosensitivity | 33321156 | 10.1016/j.jconrel.2020.12.0 |
| negative | Regulation: | HIF1A   | --- | chemosensitivity | 32137820 | 10.1093/annonc/mdy303.054   |
| negative | Regulation: | HIF1A   | --- | chemosensitivity | 17303624 |                             |
| negative | Regulation: | HIF1A   | --- | chemosensitivity | 20706634 |                             |
| negative | Regulation: | HIF1A   | --- | chemosensitivity | 28534514 | 10.1038/onc.2017.119        |
| negative | Regulation: | HIF1A   | --- | chemosensitivity | 29693166 | 10.3892/ijo.2018.4376       |
| negative | Regulation: | HIF1A   | --- | chemosensitivity | 30569180 | 10.3892/or.2018.6929        |
| negative | Regulation: | HIF1A   | --- | chemosensitivity | 30569180 | 10.3892/or.2018.6929        |
| negative | Regulation: | HIF1A   | --- | chemosensitivity | 30842147 | 10.21873/anticanres.13227   |
| negative | Regulation: | HIF1A   | --- | chemosensitivity | 30842147 | 10.21873/anticanres.13227   |
| negative | Regulation: | HIF1A   | --- | chemosensitivity | 30842147 | 10.21873/anticanres.13227   |
| negative | Regulation: | HIF1A   | --- | chemosensitivity | 30842147 | 10.21873/anticanres.13227   |
| negative | Regulation: | HIF1A   | --- | chemosensitivity | 30842147 | 10.21873/anticanres.13227   |
| negative | Regulation: | HIF1A   | --- | chemosensitivity | 30842147 | 10.21873/anticanres.13227   |
| negative | Regulation: | HIF1A   | --- | chemosensitivity | 30842147 | 10.21873/anticanres.13227   |
| negative | Regulation: | HIF1A   | --- | chemosensitivity | 31370155 | 10.3390/ijms20153736        |
| negative | Regulation: | HIF1A   | --- | chemosensitivity | 32432742 | 10.26355/eurrev_202005_2116 |
| negative | Regulation: | HIF1A   | --- | chemosensitivity | 32781585 | 10.3390/ijms21165631        |
| negative | Regulation: | HIF1A   | --- | chemosensitivity | 22785211 | 10.4161/cbt.20838           |
| negative | Regulation: | HIF1A   | --- | chemosensitivity | 23836645 | 10.1073/pnas.1300415110     |
| negative | Regulation: | HIF1A   | --- | chemosensitivity | 20706634 | 10.1371/journal.pone.001203 |
| negative | Regulation: | HIF1A   | --- | chemosensitivity | 20706634 | 10.1371/journal.pone.001203 |
| negative | Regulation: | HIF1A   | --- | chemosensitivity | 24795051 |                             |
| negative | Regulation: | HIF1A   | --- | chemosensitivity | 24662981 | 10.1371/journal.pone.009282 |
| negative | Regulation: | HIF1A   | --- | chemosensitivity | 24737252 | 10.3892/or.2014.3140        |
| negative | Regulation: | HIF1A   | --- | chemosensitivity | 25920936 | 10.1080/15384047.2015.10409 |
| negative | Regulation: | HIF1A   | --- | chemosensitivity | 16628086 | 10.1097/00006676-200604000- |
| negative | Regulation: | HIF1A   | --- | chemosensitivity | 22785211 | 10.4161/cbt.2083810.4161/ch |
| negative | Regulation: | HIF1A   | --- | chemosensitivity | 27373041 |                             |
| negative | Regulation: | HIF1A   | --- | chemosensitivity | 28656004 | 10.7150/ijbs.1896910.7150/i |
| negative | Regulation: | HIF1A   | --- | chemosensitivity | 29275599 | 10.3760/cma.j.issn.0376-249 |
| negative | Regulation: | HIF1A   | --- | chemosensitivity | 30800222 | 10.18632/oncotarget.2663710 |
| negative | Regulation: | HIF1A   | --- | chemosensitivity | 30842147 | 10.21873/anticanres.1322710 |
| negative | Regulation: | HIF1A   | --- | chemosensitivity | 32432742 | 10.26355/eurrev_202005_2116 |
| negative | Regulation: | HIF1A   | --- | chemosensitivity | 33496749 | 10.1182/bloodadvances.20200 |
| negative | Regulation: | HIF1A   | --- | chemosensitivity | 35985176 | 10.1016/j.neo.2022.100821   |
| negative | Regulation: | HIF1A   | --- | chemosensitivity | 34383201 | 10.1007/s10620-021-07202-z  |
| negative | Regulation: | ADORA1  | --- | chemosensitivity | 34115290 | 10.1007/s12017-021-08672-0  |
| negative | Regulation: | ITGB4   | --- | chemosensitivity | 26742943 | 10.1016/j.jconrel.2015.12.0 |
| negative | Regulation: | ITGB4   | --- | chemosensitivity | 30106452 | 10.3892/or.2018.6628        |
| negative | Regulation: | ITGB4   | --- | chemosensitivity | 30106452 | 10.3892/or.2018.6628        |
| negative | Regulation: | ITGB4   | --- | chemosensitivity | 30106452 | 10.3892/or.2018.6628        |
| negative | Regulation: | ITGB4   | --- | chemosensitivity | 30106452 | 10.3892/or.2018.6628        |
| negative | Regulation: | ITGB4   | --- | chemosensitivity | 22295105 | 10.1371/journal.pone.003070 |
| negative | Regulation: | ITGB4   | --- | chemosensitivity | 30106452 | 10.3892/or.2018.662810.3892 |
| negative | Regulation: | ALK     | --- | chemosensitivity | 31832711 | 10.1007/s00253-019-10257-8  |
| negative | Regulation: | ALK     | --- | chemosensitivity | 32724469 | 10.7150/thno.4580310.7150/t |
| negative | Regulation: | MIR3617 | --- | chemosensitivity | 33545377 | 10.1016/j.etap.2021.103607  |

|                      |         |     |  |                  |          |                             |
|----------------------|---------|-----|--|------------------|----------|-----------------------------|
| negative Regulation: | MIR3617 | --- |  | chemosensitivity | 30425571 | 10.2147/CMAR.S17272210.2147 |
| negative Regulation: | PTPRZ1  | --- |  | chemosensitivity | 30497491 | 10.1186/s12964-018-0304-4   |
| negative Regulation: | VASH2   | --- |  | chemosensitivity | 31233186 | 10.3892/or.2019.7194        |
| negative Regulation: | VASH2   | --- |  | chemosensitivity | 24595063 | 10.1371/journal.pone.009035 |
| negative Regulation: | VASH2   | --- |  | chemosensitivity | 33710778 | 10.1002/cam4.384110.1002/ca |
| negative Regulation: | SRPX2   | --- |  | chemosensitivity | 30551519 | 10.1016/j.biopha.2018.10.04 |
| negative Regulation: | SRPX2   | --- |  | chemosensitivity | 32455867 | 10.3390/ijms21103655        |
| negative Regulation: | SRPX2   | --- |  | chemosensitivity | 30551519 | 10.1016/j.biopha.2018.10.04 |
| negative Regulation: | SRPX2   | --- |  | chemosensitivity | 35935582 | 10.1155/2022/2931214        |
| negative Regulation: | GFI1    | --- |  | chemosensitivity | 29494986 | 10.1016/j.biopha.2018.02.03 |
| negative Regulation: | THOC1   | --- |  | chemosensitivity | 32669125 | 10.1186/s13046-020-01634-71 |
| negative Regulation: | SRC     | --- |  | chemosensitivity | 29079189 | 10.1016/j.bbrc.2017.10.118  |
| negative Regulation: | SRC     | --- |  | chemosensitivity | 32446364 | 10.1016/j.bbrc.2020.04.107  |
| negative Regulation: | SRC     | --- |  | chemosensitivity | 26690339 | 10.1016/j.drug.2015.10.003  |
| negative Regulation: | SRC     | --- |  | chemosensitivity | 18078709 | 10.1016/j.canlet.2007.10.03 |
| negative Regulation: | SRC     | --- |  | chemosensitivity | 15194078 | 10.1016/j.jamcollsurg.2004. |
| negative Regulation: | SRC     | --- |  | chemosensitivity | 15194078 | 10.1016/j.jamcollsurg.2004. |
| negative Regulation: | SRC     | --- |  | chemosensitivity | 16621676 | 10.1016/j.drug.2006.02.002  |
| negative Regulation: | SRC     | --- |  | chemosensitivity | 24388104 | 10.1016/j.critrevonc.2013.1 |
| negative Regulation: | SRC     | --- |  | chemosensitivity | 19158362 |                             |
| negative Regulation: | SRC     | --- |  | chemosensitivity | 21152443 |                             |
| negative Regulation: | SRC     | --- |  | chemosensitivity | 29749405 | 10.1038/s41419-018-0574-1   |
| negative Regulation: | SRC     | --- |  | chemosensitivity | 29749405 | 10.1038/s41419-018-0574-1   |
| negative Regulation: | SRC     | --- |  | chemosensitivity | 29978609 | 10.3349/ymj.2018.59.6.727   |
| negative Regulation: | SRC     | --- |  | chemosensitivity | 31113938 | 10.1038/s41419-019-1633-y   |
| negative Regulation: | SRC     | --- |  | chemosensitivity | 31113938 | 10.1038/s41419-019-1633-y   |
| negative Regulation: | SRC     | --- |  | chemosensitivity | 21720550 | 10.1371/journal.pone.002149 |
| negative Regulation: | SRC     | --- |  | chemosensitivity | 21720550 | 10.1371/journal.pone.002149 |
| negative Regulation: | SRC     | --- |  | chemosensitivity | 18794807 | 10.1038/onc.2008.32610.1038 |
| negative Regulation: | SRC     | --- |  | chemosensitivity | 27825112 | 10.18632/oncotarget.1306710 |
| negative Regulation: | SRCIN1  | --- |  | chemosensitivity | 28393242 | 10.3892/ijo.2017.3952       |
| negative Regulation: | CXCL8   | --- |  | chemosensitivity | 32898567 | 10.1016/j.abb.2020.108571   |
| negative Regulation: | CXCL8   | --- |  | chemosensitivity | 33539818 | 10.1016/j.ejphar.2021.17392 |
| negative Regulation: | CXCL8   | --- |  | chemosensitivity | 25687885 | 10.1016/j.canlet.2015.02.02 |
| negative Regulation: | CXCL8   | --- |  | chemosensitivity | 19646263 |                             |
| negative Regulation: | CXCL8   | --- |  | chemosensitivity | 29693201 | 10.1007/s00280-018-3584-x   |
| negative Regulation: | CXCL8   | --- |  | chemosensitivity | 22617157 | 10.1038/bjc.2012.177        |
| negative Regulation: | CXCL8   | --- |  | chemosensitivity | 25972907 | 10.1155/2015/917345         |
| negative Regulation: | CXCL8   | --- |  | chemosensitivity | 23321310 | 10.1016/j.bbrc.2013.01.0221 |
| negative Regulation: | CXCL8   | --- |  | chemosensitivity | 34847866 | 10.1186/s12885-021-09025-71 |
| negative Regulation: | CXCL8   | --- |  | chemosensitivity | 34847866 | 10.1186/s12885-021-09025-7  |
| negative Regulation: | CXCL8   | --- |  | chemosensitivity | 34847866 | 10.1186/s12885-021-09025-7  |
| negative Regulation: | CXCL8   | --- |  | chemosensitivity | 34847866 | 10.1186/s12885-021-09025-7  |
| negative Regulation: | CXCL8   | --- |  | chemosensitivity | 34847866 | 10.1186/s12885-021-09025-7  |
| negative Regulation: | MYO1B   | --- |  | chemosensitivity | 35861939 | 10.1002/jcp.30831           |
| negative Regulation: | POSTN   | --- |  | chemosensitivity | 30978348 | 10.1016/j.lfs.2019.04.021   |
| negative Regulation: | POSTN   | --- |  | chemosensitivity | 29404445 | 10.1002/hep4.111410.1002/he |
| negative Regulation: | MIR520G | --- |  | chemosensitivity | 25616665 | 10.1074/jbc.M114.620252     |
| negative Regulation: | MIR520G | --- |  | chemosensitivity | 25616665 | 10.1074/jbc.M114.620252     |
| negative Regulation: | KIF18B  | --- |  | chemosensitivity | 34058791 | 10.1002/biof.175710.1002/bi |
| negative Regulation: | LAMTOR5 | --- |  | chemosensitivity | 29309885 | 10.1016/j.gene.2018.01.019  |
| negative Regulation: | LAMTOR5 | --- |  | chemosensitivity | 34606782 | 10.1016/j.pharmthera.2021.1 |
| negative Regulation: | NDRG1   | --- |  | chemosensitivity | 30443171 | 10.7150/ijms.28055          |
| negative Regulation: | JAK2    | --- |  | chemosensitivity | 32160976 | 10.1016/j.canlet.2020.03.00 |
| negative Regulation: | JAK2    | --- |  | chemosensitivity | 24220695 | 10.1038/bjc.2013.673        |

|          |             |        |     |                  |          |                              |
|----------|-------------|--------|-----|------------------|----------|------------------------------|
| negative | Regulation: | MERTK  | --- | chemosensitivity | 32417270 | 10.1016/j.pharmthera.2020.1  |
| negative | Regulation: | MERTK  | --- | chemosensitivity | 24184575 | 10.1016/j.brainres.2013.10.  |
| negative | Regulation: | MERTK  | --- | chemosensitivity | 27558819 | 10.1007/978-3-319-39406-0_5  |
| negative | Regulation: | MERTK  | --- | chemosensitivity | 27558819 | 10.1007/978-3-319-39406-0_5  |
| negative | Regulation: | MERTK  | --- | chemosensitivity | 27558819 | 10.1007/978-3-319-39406-0_5  |
| negative | Regulation: | MERTK  | --- | chemosensitivity | 27558819 | 10.1007/978-3-319-39406-0_5  |
| negative | Regulation: | MERTK  | --- | chemosensitivity | 27712586 | 10.3727/096504016X146487014  |
| negative | Regulation: | MERTK  | --- | chemosensitivity | 28468579 | 10.1177/1010428317699796     |
| negative | Regulation: | MERTK  | --- | chemosensitivity | 31636733 | 10.1155/2019/2387614         |
| negative | Regulation: | MERTK  | --- | chemosensitivity | 22005534 | 10.1097/01.JTO.0000407562.C  |
| negative | Regulation: | MERTK  | --- | chemosensitivity | 33509214 | 10.1186/s12964-020-00694-8   |
| negative | Regulation: | MERTK  | --- | chemosensitivity | 22179835 | 10.1038/onc.2011.588         |
| negative | Regulation: | MERTK  | --- | chemosensitivity | 22179835 | 10.1038/onc.2011.588         |
| negative | Regulation: | MERTK  | --- | chemosensitivity | 22179835 | 10.1038/onc.2011.588         |
| negative | Regulation: | MERTK  | --- | chemosensitivity | 22890323 | 10.1038/onc.2012.355         |
| negative | Regulation: | MERTK  | --- | chemosensitivity | 22890323 | 10.1038/onc.2012.355         |
| negative | Regulation: | MERTK  | --- | chemosensitivity | 22890323 | 10.1038/onc.2012.355         |
| negative | Regulation: | MERTK  | --- | chemosensitivity | 20423999 | 10.1158/1535-7163.MCT-09-07  |
| negative | Regulation: | MERTK  | --- | chemosensitivity | 22179835 | 10.1038/onc.2011.58810.1038  |
| negative | Regulation: | MERTK  | --- | chemosensitivity | 22890323 | 10.1038/onc.2012.35510.1038  |
| negative | Regulation: | MERTK  | --- | chemosensitivity | 23353780 | 10.1038/bc.j.2012.4610.1038/ |
| negative | Regulation: | MERTK  | --- | chemosensitivity | 23997116 | 10.1158/1535-7163.MCT-13-00  |
| negative | Regulation: | MERTK  | --- | chemosensitivity | 25596315 | 10.1016/j.bbrc.2015.01.0171  |
| negative | Regulation: | MERTK  | --- | chemosensitivity | 27783662 | 10.1371/journal.pone.016510  |
| negative | Regulation: | MERTK  | --- | chemosensitivity |          | 10.1155/2019/2387614         |
| negative | Regulation: | MERTK  | --- | chemosensitivity |          | 10.1007/s12272-019-01169-2   |
| negative | Regulation: | MERTK  | --- | chemosensitivity | 34779503 | 10.3892/mmr.2021.12529       |
| negative | Regulation: | MERTK  | --- | chemosensitivity | 35708914 | 10.1172/JCI150517            |
| negative | Regulation: | ROR2   | --- | chemosensitivity | 24158497 | 10.1007/s00018-013-1485-z10  |
| negative | Regulation: | HOTAIR | --- | chemosensitivity | 29224950 | 10.1016/j.cca.2017.12.009    |
| negative | Regulation: | HOTAIR | --- | chemosensitivity | 31901481 | 10.1016/j.cca.2019.12.028    |
| negative | Regulation: | HOTAIR | --- | chemosensitivity | 33785336 | 10.1016/j.lfs.2021.119419    |
| negative | Regulation: | HOTAIR | --- | chemosensitivity | 27717733 | 10.1016/j.bbcan.2016.10.001  |
| negative | Regulation: | HOTAIR | --- | chemosensitivity | 32505000 | 10.1016/j.omtn.2020.05.011   |
| negative | Regulation: | HOTAIR | --- | chemosensitivity | 27875938 | 10.1080/10245332.2016.12581  |
| negative | Regulation: | HOTAIR | --- | chemosensitivity | 29168767 | 10.3390/i.jms18122505        |
| negative | Regulation: | HOTAIR | --- | chemosensitivity | 29455183 | 10.1515/hsz-2017-0274        |
| negative | Regulation: | HOTAIR | --- | chemosensitivity | 30113217 | 10.1089/dna.2018.4312        |
| negative | Regulation: | HOTAIR | --- | chemosensitivity |          | 10.1007/s12038-018-9820-z    |
| negative | Regulation: | HOTAIR | --- | chemosensitivity | 31746420 | 10.3892/i.jo.2019.4909       |
| negative | Regulation: | HOTAIR | --- | chemosensitivity | 32349783 | 10.1186/s40659-020-00286-3   |
| negative | Regulation: | HOTAIR | --- | chemosensitivity | 32349783 | 10.1186/s40659-020-00286-3   |
| negative | Regulation: | HOTAIR | --- | chemosensitivity | 32705261 | 10.3892/or.2020.7685         |
| negative | Regulation: | HOTAIR | --- | chemosensitivity | 33238475 | 10.3390/i.jms21228855        |
| negative | Regulation: | HOTAIR | --- | chemosensitivity | 25422887 | 10.1371/journal.pone.011067  |
| negative | Regulation: | HOTAIR | --- | chemosensitivity | 26800519 | 10.1371/journal.pone.014723  |
| negative | Regulation: | HOTAIR | --- | chemosensitivity | 26341496 | 10.1007/s13277-015-3998-6    |
| negative | Regulation: | HOTAIR | --- | chemosensitivity | 26341496 | 10.1007/s13277-015-3998-6    |
| negative | Regulation: | HOTAIR | --- | chemosensitivity | 26781446 | 10.1007/s00280-016-2964-310  |
| negative | Regulation: | HOTAIR | --- | chemosensitivity | 26781446 | 10.1007/s00280-016-2964-310  |
| negative | Regulation: | HOTAIR | --- | chemosensitivity | 26781446 | 10.1007/s00280-016-2964-310  |
| negative | Regulation: | HOTAIR | --- | chemosensitivity | 29236333 | 10.1002/jcb.2659410.1002/jc  |
| negative | Regulation: | HOTAIR | --- | chemosensitivity | 29250186 | 10.3892/ol.2017.723710.3892  |

|          |             |         |     |                  |          |                             |
|----------|-------------|---------|-----|------------------|----------|-----------------------------|
| negative | Regulation: | HOTAIR  | --- | chemosensitivity | 29250186 | 10.3892/o1.2017.723710.3892 |
| negative | Regulation: | HOTAIR  | --- | chemosensitivity | 29455183 | 10.1515/hsz-2017-027410.151 |
| negative | Regulation: | HOTAIR  | --- | chemosensitivity | 29455183 | 10.1515/hsz-2017-027410.151 |
| negative | Regulation: | HOTAIR  | --- | chemosensitivity | 32349783 | 10.1186/s40659-020-00286-31 |
| negative | Regulation: | HOTAIR  | --- | chemosensitivity | 34790046 | 10.7150/IJMS.64253          |
| negative | Regulation: | HOTAIR  | --- | chemosensitivity | 33502891 | 10.4149/neo_2021_201112N121 |
| negative | Regulation: | PTRF    | --- | chemosensitivity | 24747515 | 10.1371/journal.pone.009343 |
| negative | Regulation: | PTRF    | --- | chemosensitivity | 24747515 | 10.1371/journal.pone.009343 |
| negative | Regulation: | PTRF    | --- | chemosensitivity | 24747515 | 10.1371/journal.pone.009343 |
| negative | Regulation: | PROM1   | --- | chemosensitivity | 23268401 |                             |
| negative | Regulation: | PROM1   | --- | chemosensitivity | 32246247 | 10.1007/s11033-020-05411-91 |
| negative | Regulation: | ATG4A   | --- | chemosensitivity | 31291988 | 10.1186/s13046-019-1287-8   |
| negative | Regulation: | ATG4A   | --- | chemosensitivity | 35088889 | 10.3892/mmr.2022.1261710.38 |
| negative | Regulation: | TIMP1   | --- | chemosensitivity | 32522594 | 10.1016/j.bcp.2020.114085   |
| negative | Regulation: | TIMP1   | --- | chemosensitivity | 21684102 | 10.1016/j.biopha.2011.02.00 |
| negative | Regulation: | TIMP1   | --- | chemosensitivity | 21684102 | 10.1016/j.biopha.2011.02.00 |
| negative | Regulation: | ZEB1    | --- | chemosensitivity | 30107990 | 10.1016/j.prp.2018.07.036   |
| negative | Regulation: | ZEB1    | --- | chemosensitivity | 29352223 | 10.1038/s41419-017-0087-3   |
| negative | Regulation: | ZEB1    | --- | chemosensitivity | 31323761 | 10.3390/ijms20143518        |
| negative | Regulation: | ZEB1    | --- | chemosensitivity | 22116519 | 10.1159/000334449           |
| negative | Regulation: | ZEB1    | --- | chemosensitivity | 25890268 | 10.1186/s12943-015-0357-6   |
| negative | Regulation: | ZEB1    | --- | chemosensitivity | 23255418 | 10.1002/jcb.2448110.1002/jc |
| negative | Regulation: | ZEB1    | --- | chemosensitivity | 25890268 | 10.1186/s12943-015-0357-610 |
| negative | Regulation: | ZEB1    | --- | chemosensitivity | 26036631 | 10.18632/oncotarget.3896    |
| negative | Regulation: | PRKCQ   | --- | chemosensitivity | 32600444 | 10.1186/s13058-020-01302-w1 |
| negative | Regulation: | MIR499A | --- | chemosensitivity | 34453645 | 10.1007/s11010-021-04249-4  |
| negative | Regulation: | UBD     | --- | chemosensitivity | 23812429 | 10.1038/onc.2013.236        |
| negative | Regulation: | MIR642A | --- | chemosensitivity | 33152911 | 10.1016/j.biopha.2020.11072 |
| negative | Regulation: | GFER    | --- | chemosensitivity | 29048676 | 10.3892/or.2017.5984        |
| negative | Regulation: | GFER    | --- | chemosensitivity | 29048676 | 10.3892/or.2017.598410.3892 |
| negative | Regulation: | HHLA2   | --- | chemosensitivity | 36535461 | 10.1016/j.gene.2022.147086  |
| negative | Regulation: | HHLA2   | --- | chemosensitivity | 36535461 | 10.1016/j.gene.2022.147086  |
| negative | Regulation: | GLS     | --- | chemosensitivity | 35294039 | 10.3892/ijo.2022.5337       |
| negative | Regulation: | TUG1    | --- | chemosensitivity | 29543785 | 10.12659/MSM.906616         |
| negative | Regulation: | TUG1    | --- | chemosensitivity | 29543785 | 10.12659/MSM.906616         |
| negative | Regulation: | TUG1    | --- | chemosensitivity | 31141943 | 10.3390/ijms20112615        |
| negative | Regulation: | TUG1    | --- | chemosensitivity | 32705269 | 10.3892/ijo.2020.5100       |
| negative | Regulation: | TUG1    | --- | chemosensitivity | 32804119 | 10.3233/CH-200906           |
| negative | Regulation: | TUG1    | --- | chemosensitivity | 35184425 | 10.3349/ymj.2022.63.3.229   |
| negative | Regulation: | TUG1    | --- | chemosensitivity | 35643221 | 10.1016/j.semcancer.2022.05 |
| negative | Regulation: | TUG1    | --- | chemosensitivity | 36539367 | 10.1097/CAD.000000000000139 |
| negative | Regulation: | TUG1    | --- | chemosensitivity | 36539367 | 10.1097/CAD.000000000000139 |
| negative | Regulation: | TUG1    | --- | chemosensitivity | 36539367 | 10.1097/CAD.000000000000139 |
| negative | Regulation: | TUG1    | --- | chemosensitivity | 36539367 | 10.1097/CAD.000000000000139 |
| negative | Regulation: | TUG1    | --- | chemosensitivity | 36539367 | 10.1097/CAD.000000000000139 |
| negative | Regulation: | TUG1    | --- | chemosensitivity | 36539367 | 10.1097/CAD.000000000000139 |
| negative | Regulation: | TUG1    | --- | chemosensitivity | 36539367 | 10.1097/CAD.000000000000139 |
| negative | Regulation: | TUG1    | --- | chemosensitivity | 36539367 | 10.1097/CAD.000000000000139 |
| negative | Regulation: | TUG1    | --- | chemosensitivity | 36539367 | 10.1097/CAD.000000000000139 |
| negative | Regulation: | TUG1    | --- | chemosensitivity | 36539367 | 10.1097/CAD.000000000000139 |
| negative | Regulation: | TUG1    | --- | chemosensitivity | 36539367 | 10.1097/CAD.000000000000139 |
| negative | Regulation: | TUG1    | --- | chemosensitivity | 36539367 | 10.1097/CAD.000000000000139 |
| negative | Regulation: | ICMT    | --- | chemosensitivity | 29746868 | 10.1016/j.bbrc.2018.05.038  |
| negative | Regulation: | ICMT    | --- | chemosensitivity | 29331763 | 10.1016/j.biopha.2018.01.04 |
| negative | Regulation: | ICMT    | --- | chemosensitivity | 30882399 | 10.1097/CAD.000000000000077 |





|          |             |        |     |                  |          |                             |
|----------|-------------|--------|-----|------------------|----------|-----------------------------|
| negative | Regulation: | SIRT1  | --- | chemosensitivity | 24223900 | 10.1371/journal.pone.007916 |
| negative | Regulation: | SIRT1  | --- | chemosensitivity | 23542177 | 10.1038/onc.2013.88         |
| negative | Regulation: | SIRT1  | --- | chemosensitivity | 23542177 | 10.1038/onc.2013.88         |
| negative | Regulation: | SIRT1  | --- | chemosensitivity | 25032850 | 10.1038/cddis.2014.270      |
| negative | Regulation: | SIRT1  | --- | chemosensitivity | 26662958 | 10.1007/s13277-015-4459-y   |
| negative | Regulation: | SIRT1  | --- | chemosensitivity | 21947960 | 10.1007/s10930-011-9354-910 |
| negative | Regulation: | SIRT1  | --- | chemosensitivity | 23542177 | 10.1038/onc.2013.8810.1038/ |
| negative | Regulation: | SIRT1  | --- | chemosensitivity | 24223900 | 10.1371/journal.pone.007916 |
| negative | Regulation: | SIRT1  | --- | chemosensitivity | 26398583 | 10.3892/or.2015.428710.3892 |
| negative | Regulation: | SIRT1  | --- | chemosensitivity | 32831651 | 10.1186/s12935-020-01489-01 |
| negative | Regulation: | SIRT1  | --- | chemosensitivity | 34590923 | 10.1177/03000605211040762   |
| negative | Regulation: | LIF    | --- | chemosensitivity | 34265288 | 10.1016/j.yexcr.2021.112734 |
| negative | Regulation: | FN1    | --- | chemosensitivity | 29512696 | 10.3892/mmr.2018.8656       |
| negative | Regulation: | SUB1   | --- | chemosensitivity | 33524870 | 10.1016/j.bbrc.2021.01.0291 |
| negative | Regulation: | CYP1B1 | --- | chemosensitivity | 25860934 | 10.18632/oncotarget.3484    |
| negative | Regulation: | CYP1B1 | --- | chemosensitivity | 33469378 | 10.2147/CMAR.S27739910.2147 |
| negative | Regulation: | CYP1B1 | --- | chemosensitivity | 33469378 | 10.2147/CMAR.S27739910.2147 |
| negative | Regulation: | CYP1B1 | --- | chemosensitivity | 36077068 | 10.3390/ijms23179670        |
| negative | Regulation: | TWIST1 | --- | chemosensitivity | 32853985 | 10.1016/j.ebiom.2020.102955 |
| negative | Regulation: | TWIST1 | --- | chemosensitivity | 18331824 | 10.1016/j.bbrc.2008.02.143  |
| negative | Regulation: | TWIST1 | --- | chemosensitivity | 18331824 | 10.1016/j.bbrc.2008.02.143  |
| negative | Regulation: | TWIST1 | --- | chemosensitivity | 18331824 | 10.1016/j.bbrc.2008.02.143  |
| negative | Regulation: | TWIST1 | --- | chemosensitivity | 18331824 | 10.1016/j.bbrc.2008.02.143  |
| negative | Regulation: | TWIST1 | --- | chemosensitivity | 28214899 | 10.1159/000447238           |
| negative | Regulation: | TWIST1 | --- | chemosensitivity | 22673193 | 10.1038/cddis.2012.63       |
| negative | Regulation: | TWIST1 | --- | chemosensitivity | 23741524 | 10.1371/journal.pone.006607 |
| negative | Regulation: | TWIST1 | --- | chemosensitivity | 24805866 | 10.3892/mmr.2014.2212       |
| negative | Regulation: | TWIST1 | --- | chemosensitivity | 24805866 | 10.3892/mmr.2014.2212       |
| negative | Regulation: | TWIST1 | --- | chemosensitivity | 24805866 | 10.3892/mmr.2014.2212       |
| negative | Regulation: | TWIST1 | --- | chemosensitivity | 24805866 | 10.3892/mmr.2014.2212       |
| negative | Regulation: | TWIST1 | --- | chemosensitivity | 18331824 | 10.1016/j.bbrc.2008.02.143  |
| negative | Regulation: | TWIST1 | --- | chemosensitivity | 24805866 | 10.3892/mmr.2014.2212       |
| negative | Regulation: | TWIST1 | --- | chemosensitivity | 19272800 | 10.1016/j.urolonc.2008.12.C |

.5

015664

015664

015664

015664

015664

0. 1016/j. omta. 2021. 01. 008

i. 012

013

.3

.186/1746-1596-9-143

410. 1016/j. canlet. 2019. 10. 044

as. 14921

li. 13089

:/o1. 2017. 7059

7

6

6

7

8

2

2

9

5

6

7

8

03/toxsci/kfq028  
0/onc. 2011. 222  
074/jbc. M111. 295964  
238/2015. March. 30. 3  
4610. 1158/0008-5472. CAN-14-2946

1710. 1158/1078-0432. CCR-16-1317  
510. 1016/j. canlet. 2021. 09. 035  
8

141436

0/or. 2016. 4585  
0/or. 2017. 5519

-9  
i-X

07  
151120  
183353  
183353  
183353

0

78  
0. 1007/s00280-011-1682-0  
2/mmr. 2012. 1017  
2/mmr. 2012. 1017  
186/1756-9966-31-73  
1186/1477-7819-12-255

doi:10.1186/s12957-015-0501-1  
18632/oncotarget.8105  
192/mmr.2021.12267  
17

151120

6

doi:10.26355/eurrev\_202009\_22833

3  
5  
9.10.415  
doi:10.1016/j.ccell.2018.05.001

48

1

8

0

18632/oncotarget.4581  
doi:10.1186/s12935-015-0250-9

14.2016

154711

1

80

75

/bjc. 2014. 386

/bjc. 2014. 386

2

02. 013

4

8

9

1

510. 1016/j. canlet. 2016. 08. 015

/ph. 2016. 6625

/ph. 2016. 6625

/ph. 2016. 6625

OTT. S158655

06

0. 1038/s41419-020-02855-6

06

06

06

06

06

06

06

47

29999

OTT. S97399

DT. S97399  
io. 015552  
0. 1038/s41419-020-02855-6

cept. 13286

.100633

'2015/989070  
.074/jbc. M115. 700021

02/i jo. 2016. 3671  
010. 4149/neo\_2020\_200614N629

|  
|  
|  
|

0. 1007/s00210-019-01772-6  
0. 1007/s00210-019-01772-6

ep. 29040

0  
2

010. 1016/j. canlet. 2018. 04. 030

DT. S64339  
A. 588  
A. 588

.110. 1016/j. clinre. 2017. 01. 011  
9

052

06  
02

0. 1186/s12935-018-0581-4

0110. 1016/j. phymed. 2021. 153601

02/mmr. 2015. 4331

02/mmr. 2015. 4331

0485400

0485400

0485400

043

043

;

0145236

04

05

05

01

038/cddis. 2017. 248

01

0. 1016/j. prp. 2019. 01. 042

icmm. 15291



08

0. 1016/j. omtn. 2017. 07. 001

1

0. 1016/j. omtn. 2017. 07. 001

;/or. 2017. 6082

0. 1186/s13046-018-0930-0

0. 1186/s13046-018-0930-0

0. 1186/s13046-018-0930-0

0. 1016/j. abb. 2019. 01. 023

0. 1186/s13046-019-1158-3

;

;

;

0. 1016/j. yexcr. 2013. 08. 023

0. 1016/j. yexcr. 2013. 08. 023

;/or. 2018. 6524

0. 05. 642

041961

0. 18632/oncotarget. 13985

0

3

6

0. 016

;

2. 05. 041

2. 05. 041

2. 05. 041

2.05.041

)  
)  
)

0  
2/mmr. 2017. 6621  
0. 1016/j. omt. 2018. 10. 002  
10. 1016/j. ebiom. 2019. 08. 037  
10. 1016/j. ebiom. 2019. 09. 046  
4

2/ol. 2022. 13200  
0. 1186/s13046-022-02270-z  
0. 1186/s13046-022-02270-z

7  
7

5/hsz-2020-0345

27401

2740110. 3727/096504019X15742472027401

0. 1186/s12935-021-02153-x10. 1016/S0140-6736(18) 30990-510. 7150/jca. 2027710. 3322/ca  
0. 1186/s12935-021-02153-x10. 1016/S0140-6736(18) 30990-510. 7150/jca. 2027710. 3322/ca

01  
4

410. 1182/blood-2016-01-692244  
/or. 2017. 6056

)  
1

7

145637  
145637  
162828

10.1111/j.1582-4934.2008.00257.x  
10.1158/0008-5472.CAN-10-2048  
p.26777  
10.1016/j.ebiom.2019.02.012  
10.1016/j.ebiom.2019.05.001  
10.1016/j.ebiom.2020.103041

16  
16  
16  
icla.23135

icla.24313  
icla.24313  
nar/gkab084  
nar/gkab084

1136/jitc-2021-003793  
10.1016/j.surg.2016.11.036  
12

034  
1.004

1-3  
1-4

1-8  
.8

1-X  
-8  
-8  
19

16

105

141961

10

11

.3  
105

1247. x  
10910. 1016/j. leukres. 2009. 05. 009  
22437  
1. 3332/ecancer. 2020. 1054

0. 1007/s10565-021-09651-810. 1016/j. celrep. 2015. 12. 08610. 1016/j. bcp. 2017. 11. 00810.

0491659

i  
096/fj. 201801339RRR

'20

i0

2. 815

'6

l. 1186/s12935-019-0982-z

i  
ep42319  
'0  
.0  
i8  
.004

21037/hbsn. 2018. 10. 07

b. 27851

i. 024

i162848

i162848

.4

01466. x

01466. x

'-7

3748/wjg.v20.i25.8229  
3389/fonc.2021.618764  
3389/fonc.2021.618764  
6

610.7754/Clin.Lab.2017.171026

20.106502

002/1873-3468.12566

9  
.11.039  
.11.039  
1.001  
47

34105

7  
9.2010.20.028  
9.2010.20.028  
06722

1

0.1007/s10620-008-0329-4

0.1007/s11845-009-0448-8

20663  
20663  
1510.1158/0008-5472.CAN-11-2315

doi:10.1097/IGC.0b013e31827ad2b8

doi:10.1097/cancers.3021929

doi:10.1097/

doi:10.1097/mmj.00000000000002413

doi:10.1097/mmj.00000000000002413

doi:10.1016/j.canlet.2015.05.033

doi:10.1016/j.bbrc.2018.04.129

doi:10.1016/j.

doi:10.1016/j.

doi:10.1016/j.issn.1673-4254.2020.11.03

doi:10.1016/j.

doi:10.1016/j.

doi:10.1016/j.

doi:10.1016/j.

doi:10.1016/j.lfs.2021.119405

doi:10.1016/j.

doi:10.1016/j.

doi:10.1016/j.ol.2019.10160

doi:10.1016/j.mol.107.044743

doi:10.1016/j.onc.2011.399

doi:10.1016/j.CMAR. S187099

doi:10.1016/j.fj.201900731RR

doi:10.1016/j.

i2

01

;/bjc.2017.238

;

i4

03

'735

04

2.010

'57

.54

.5

.5

:101758

:15

0.1007/s11010-008-9847-9

i2910.1158/1078-0432.CCR-08-0629

0.18632/oncotarget.18518

:92/ijmm.2018.3939

02/o1.2021.12794

03

;/jid.2009.365

,

.5

.5



l. 1016/j. dld. 2017. 02. 009

'abbs/gmx086

07

.210. 1371/journal. pone. 0097242

03

l. 3858/emm. 2012. 44. 4. 019

.6

02/i jo. 2022. 5365

02/i jo. 2022. 5365

'501

l. 1186/s12885-018-4649-2

.05

.792. x10. 1111/j. 1478-3231. 2008. 01792. x

02/i jo. 2021. 5218

02/i jo. 2021. 5218

052

.0

03/annonc/mdt307

.010. 1016/j. bulcan. 2015. 01. 010

08

08

0810. 26355/eurrev\_201812\_16508

0115539

08

09/bcb-2017-0162

0. 1186/s13046-019-1091-5

09

09

01

01

3389/fonc. 2021. 620873

05

0-0

043

0

09

3

0.02.016

01

.009

01

0.104950

06

;

04

05

01

01

06

06

08

08

0.02.002

.1

;

09

.003

.003

0.04.027

.1

03356

0125459

817

20840

20840

4

87

186/1471-2407-10-27

/onc. 2011. 222

810. 1016/j. arcmed. 2011. 06. 008

186/1476-4598-13-52

. 1007/s13277-014-2068-9

010. 1016/j. clinre. 2016. 02. 010

1177/1010428317707372

. 1007/s11010-014-1976-8

. 1007/s11010-014-1976-8

5

1

1

3

095414

5

10.1016/j.arcmed.2011.06.008

b.28747

b.28747

10.1016/j.ygyno.2014.01.034

10.1016/j.biopha.2017.06.089

1177/1010428317707372

1

Expr.2021039983

5.003

9

9

1110.1016/j.leukres.2012.06.011

5

11

4

4

,

03

03

;

182344

1

76

92

92

5710.1158/1535-7163.MCT-08-0857  
047.x10.1111/j.1464-410X.2009.09047.x  
c.22465  
'cgt.2011.89

l.1007/s13277-013-1393-8  
0310.1016/j.jnutbio.2014.01.003

2/ijo.2015.2842  
18234410.2174/1568009616666160630182344  
l.18632/oncotarget.20610

7  
l.18632/oncotarget.14871

;/or.2021.8134

;/bjc.2015.125

5  
510.1097/CAD.0b013e3283608bc5

;/or.2018.6698

7  
.1

.112141

0199.x10.1111/j.1742-7843.2007.00199.x  
010.1016/j.canlet.2016.03.030

89  
l.1038/s12276-018-0197-8

0/i jms222212502  
0/i jms222212502

.186/1471-2407-9-323  
.186/1471-2407-9-323

a. 14506

.0

p. 27198  
a. 14506

/or. 2012. 1655

.0. 1016/j. bbrc. 2020. 06. 066  
.0. 1016/j. bbrc. 2021. 01. 004

05

'ncomms15772  
i2  
l

l  
l  
/or. 2018. 6929

02/i jo. 2014. 2523

l. 1007/s13277-014-1833-0  
02/i jo. 2015. 3131  
02/i jo. 2015. 3131  
/ol. 2017. 7045

:/ol. 2017. 7045

096/fj. 201801339RRR

:9

.0. 1016/j. taap. 2018. 09. 018

'OTT. S172379

um4. 1860

:910. 1016/j. ijporl. 2020. 110249

15

0429. x

0429. x

l. 1007/s11010-010-0453-2

.0. 1016/j. ejca. 2010. 03. 038

l. 1007/s11010-011-0790-9

:b. 24080

l. 1007/s10620-013-2673-2

l. 1186/s12885-016-2437-4



i/2018/6953506

071

071

'2

802/jgo. 2018. 29. e99

32/aging. 102673

01. 2018. 8338

06

05

1177/1724600820926172

0

26/sciadv. abf9096

0610. 1158/1535-7163. MCT-13-0806

05

02

00

00

0. 012

0

03

0183110

0/i jms16046677

1010.1016/j.biopha.2019.108720  
.002/2211-5463.12649  
.002/2211-5463.12676  
.213352

2  
4  
02.004

'cgt.2008.16  
2/ijo.2013.1925  
2/ijo.2013.1925  
2/mmr.2015.3372

;/or.2017.5584  
;/or.2017.5866  
.0.4149/neo\_2019\_190106N18

6  
6  
;/bjc.2013.579

;/bjc.2013.579  
;/bjc.2013.579  
;/bjc.2013.579  
;/bjc.2013.579  
;/bjc.2013.579

4162/nrp. 2020. 14. 2. 95

9

28

/MSM. 919219

2

16

1610. 1016/j. cellsig. 2014. 03. 016

. 18632/oncotarget. 22245

4

1

3

!

0

03. 006

3

3

ic. 23371

01510. 1016/j. lungcan. 2009. 03. 015

04810. 1158/1535-7163. MCT-09-0148

00322986

00322849

ed. 12138

02/mmr. 2013. 1400

010. 1016/j. yexmp. 2016. 05. 003

0. 1016/j. bbrc. 2016. 06. 057

0389/fonc. 2019. 00185

01/or. 2020. 7710

0. 1007/s10495-022-01718-z10. 1016/j. critrevonc. 2020. 10298810. 1016/S0925-5710(98)00

4

02/ol. 2020. 12267

0TT. S237127

1

06

0159210.1182/bloodadvances.2020001592  
0159210.1182/bloodadvances.2020001592  
15  
/ol.2018.9307

18632/oncotarget.27355

15

10

1010.1016/j.bbagen.2021.129870

2  
16

ic  
10.1016/j.ejca.2008.03.019  
1310.1016/j.jconrel.2017.09.013  
2/ol.2020.12343  
/abbs.2021011  
/abbs.2021011  
17

1007/s10571-016-0410-z  
1007/s11060-013-1045-2

11  
11  
i

5  
5

.5252/emmm. 201404837

05  
002  
0.001

0165222

.186/1476-4598-8-125  
'jnci/djt210  
0.1007/s13277-015-4528-2  
0.1016/j. csbj. 2019. 12. 010

007

0  
0  
0  
0  
02  
02  
02  
02  
032/aging. 102575

0.18632/oncotarget. 19148

4103/jcrt. JCRT\_250\_17  
0.04.003

0.08.026  
01

06  
02

4

2

2

00013-7

6

;

;

9. 20120230

9. 20120230

l. 1007/s00268-013-2010-0

l10. 1016/j. arcmed. 2013. 10. 001

l. 1007/s11010-014-2069-4

l. 1007/s12032-014-0972-x

l610. 1016/j. biopha. 2019. 109306

6

125231

b. 28305

61

61

61

61

61

61

61

l/MSM. 925298

7

1-1

2

2

4

b





0

onc. 2008. 43

l. 1016/j. prp. 2021. 153532

l/or. 2014. 3466

l. 1007/s00280-018-3759-5

l

l. 22412

l0010. 1158/1078-0432. CCR-19-2700

l2. 217

l5/hsz-2020-0345

l

l. 1186/s40659-018-0205-4

l. 1186/s40659-018-0205-4

l. 1186/s40659-018-0205-4

l8510. 1080/21691401. 2017. 1374285

l510. 1016/j. biopha. 2019. 109185

lExpr. 2021037227

l390/cancers12061521

l9

l. 1038/s41417-020-00232-110. 1002/jso. 2459210. 3748/wjg. v21. i26. 793310. 1158/1078-04

i5

.238/2015. July. 31. 25  
.238/2015. July. 31. 25  
.238/2015. July. 31. 25

!/or. 2021. 8187

i2

!/or. 2016. 4721

.3

.3

i28

!92/ijmm. 2018. 3753

!92/ijmm. 2018. 3753

i2

03556

i7

!710. 1016/j. biopha. 2016. 01. 037

.10. 1016/j. ctarc. 2021. 100364

.0. 1016/j. bbrc. 2018. 09. 191

!4

0. 1007/s00424-020-02415-z

0. 1007/s00424-020-02415-z

0. 1186/s12935-019-1089-2

02/mmr. 2017. 7923

02/mmr. 2017. 7923

02/mmr. 2017. 7923

0

:

4

3

06722

06722

3748/wjg. v18. i23. 2956

0/or. 2014. 3698

0. 18632/oncotarget. 21320

0. 18632/oncotarget. 21320

0. 18632/oncotarget. 21320

0163238

0/en. 2016-1903

03610. 1158/0008-5472. CAN-11-2536

038/cddis. 2016. 289

0. 1007/s12020-012-9762-4

0icmm. 14763

Expr. 2022041766

.0

.6

2/ijmm. 2011. 775

.0

.0

00

. 1007/s00280-018-3590-z

.3

99

99

.9

.9

07

mr. 1650

710. 1371/journal. pone. 0117097

2/ijo. 2015. 3137

2/ijo. 2015. 3137

2/ijo. 2015. 3137

.710. 1097/CAD. 0000000000000747

1390/cancers12071843

192/mmr. 2020. 11788

192/mmr. 2020. 11788

10. 1038/s41419-020-03340-w

136

1. 1007/s12032-010-9605-1

1310. 1371/journal.pone. 0100993

1. 18632/oncotarget. 11540

1. 18632/oncotarget. 11540

1/or. 2019. 7384

ic. 31868

15

ic. 28526

108410. 1016/j.mrgentox. 2019. 503084

1. 18632/oncotarget. 13291

1-1

1. 1007/s11010-016-2660-y

d  
9  
:  
1

10.1016/j.ygyno.2014.06.024  
10.1016/j.ygyno.2014.06.024  
4910.1158/1541-7786.MCR-17-0349

i  
s. 14083  
a. 48891

l. 1038/s41375-019-0593-7

0

38/sj.bjc.6605539  
38/sj.bjc.6605539

5

9  
6  
610.1097/IGC.000000000000136  
x.23418

2

2

4

;

210.1016/j.biopha.2018.08.132

4

4

lb

lb

lb

lb

9

lb10.1097/IGC.0b013e31820aaadb

lb10.1097/IGC.0b013e31820aaadb

x.23435

9

8210.1158/1078-0432.CCR-13-0082

l.1016/j.neo.2014.03.008

/CMAR.S285367

/CMAR.S285367

92/ijmm.2014.1752

l.014

l.014

2

0/ijms151222128

0/ijms151222128

;/cdd. 2015. 133

;/or. 2017. 5535

;/ol. 2018. 8180

15

.0. 1007/s11033-020-05761-4

.0. 1007/s11033-020-05761-4

.0. 1007/s11033-020-06099-7

1. 004

9

14

8

14

.910. 1016/j. biopha. 2015. 05. 019

.0. 18632/oncotarget. 12911

.0. 1016/j. clbc. 2016. 12. 005

0/MSM. 917345

0

.0. 1007/s11845-021-02516-310. 1016/S0140-6736(15)00130-010. 1016/j. soncn. 2019. 02. 002

.0. 1007/s11845-021-02516-310. 1016/S0140-6736(15)00130-010. 1016/j. soncn. 2019. 02. 002

.0. 1007/s11845-021-02516-310. 1016/S0140-6736(15)00130-010. 1016/j. soncn. 2019. 02. 002

1. 016

2. 05. 038

3. 10. 819

18



10.1016/j.lungcan.2007.09.021  
10.1007/s10495-016-1216-7  
10.1016/j.ijom.2018.4363  
10.1016/j.lfs.2020.118088  
10.11965110.1016/j.biomaterials.2019.119651  
10.1016/j.or.2017.5828  
10.1016/j.ebiom.2019.06.022  
10.1016/j.ebiom.2019.06.022  
10.1016/j.ijom.2019.06.022  
10.1016/j.lfs.2020.118088  
10.11965110.1016/j.biomaterials.2019.119651  
10.1016/j.or.2017.5828  
10.1016/j.ebiom.2019.06.022  
10.1016/j.ebiom.2019.06.022  
10.1016/j.ijom.2019.06.022  
10.1016/j.lfs.2020.118088  
10.11965110.1016/j.biomaterials.2019.119651

10

10.1016/j.lungcan.2007.09.021  
10.1007/s10495-016-1216-7  
10.1016/j.ijom.2018.4363  
10.1016/j.lfs.2020.118088  
10.11965110.1016/j.biomaterials.2019.119651  
10.1016/j.or.2017.5828  
10.1016/j.ebiom.2019.06.022  
10.1016/j.ebiom.2019.06.022  
10.1016/j.ijom.2019.06.022  
10.1016/j.lfs.2020.118088  
10.11965110.1016/j.biomaterials.2019.119651  
10.1016/j.or.2017.5828  
10.1016/j.ebiom.2019.06.022  
10.1016/j.ebiom.2019.06.022  
10.1016/j.ijom.2019.06.022  
10.1016/j.lfs.2020.118088  
10.11965110.1016/j.biomaterials.2019.119651

10

10.1016/j.lungcan.2007.09.021

10

10

10.1016/j.lungcan.2007.09.021

10

10.1016/j.lungcan.2007.09.021

10.1016/j.lungcan.2007.09.021

10.1016/j.lungcan.2007.09.021

10

10.1016/j.ebiom.2019.07.030

i

i1

9

i124336

i110.1016/j.biopha.2018.10.061

0.1007/s10863-021-09875-710.1038/sj.bjc.660271510.1016/j.brainres.2019.03.03510.1

'1

'1

9

.074/jbc.M109.027466

;/onc.2011.222

02/i jo.2014.2347

;/or.2015.4483

l.1016/j.prp.2022.153869

l.1186/s13046-019-1106-2

.0.011

05.011

'47450

074/jbc.M900735200

03

03

'20

019

02/mmr.2015.3469

rs.12846

ca.14461

l.1186/s12885-016-2542-4

.0.007

18

18

0. 1016/j. bbrc. 2008. 04. 117

0. 1038/labinvest. 2014. 123

0. 010

12

16

16

0. 18632/oncotarget. 18631

4

4

1. 3314

18. 07. 1510. 3969/j. issn. 1673-4254. 2018. 07. 15

1/ol. 2018. 9592

1/ol. 2018. 9592

1/ol. 2018. 9592

07881

111/1759-7714. 12130

66

0. 1016/j. bbrc. 2020. 09. 003

1p. 29712

0. 1016/j. prp. 2017. 09. 004

0. 1016/j. prp. 2017. 09. 004

0

6

/ph. 2016. 6764

l. 1038/s41419-019-1347-1

o. 1038/s41420-021-00402-610. 1038/s41575-019-0189-810. 1146/annurev-pathol-011110-1

o. 1038/s41420-021-00402-610. 1038/s41575-019-0189-810. 1146/annurev-pathol-011110-1

71

l. 1007/s11010-013-1767-7

o2/ijo. 2021. 5267

39

l. 1007/s00432-012-1275-2

o26/97320630081047

o/i jms16034698

16

16

o610. 1371/journal.pone. 0093896

ath. 2510

l. 18632/oncotarget. 14839

l. 3389/fcell. 2020. 582695

as. 13986

l. 1007/s13277-014-2564-y

10

102

l. 120308

o. 005

19

11

10.1016/j.canlet.2008.08.018

10.1016/j.20838

10.1016/j.biopha.2012.11.007

10.1016/j.molonc.2013.12.014

10.1016/j.bbrc.2016.06.057

10.1016/j.14733

10.1016/j.ijo.2016.3738

10

1

10.1016/j.27406

1

10.1016/j.icmm.16822

1

10.1016/j.20130169

10

10.1016/j.29833

10.1016/j.29833

0. 1038/s41388-018-0467-x

0. 1007/s10620-012-2132-5

06. 2016. 11. 01310. 3760/cma. j. issn. 0253-3766. 2016. 11. 013

0TT. S186981

05

05710. 1158/1078-0432. CCR-11-2757

05710. 1158/1078-0432. CCR-11-2757

05710. 1158/1078-0432. CCR-11-2757

09

002

092/i jmm. 2013. 1299

092/i jmm. 2013. 1299

092/i jmm. 2013. 1299

0. 1038/s41419-020-03185-3

04

07

0i

07

07

0210. 1016/j. canlet. 2013. 04. 012

0. 18632/oncotarget. 21996

02/ol. 2020. 12287

02/ol. 2020. 12287

02/ol. 2020. 12287

05

0. 1007/s11596-012-0049-z

0i/2021/9674761

0252. x

06

'0

l. 1007/s00280-008-0697-7

l. 1007/s00280-008-0697-7

l. 1007/s00280-008-0697-7

0. 1007/s00441-019-03105-8

th. 4681

l. 21873/anticanres. 13227

9

6

l. 009

l. 007

l/or. 2018. 6735

06

01

01

05

;

910. 1016/j. tranon. 2021. 101159

l. 12. 015



12.015

6

9

6

610.1371/journal.pone.0053436

2

0.1038/s41420-021-00622-w

8

1.1007/s12094-018-1937-x

5/hsz-2017-0274

5/hsz-2017-0274

0485400

0485400

0485400

5

6

1

1-7  
1-7  
10.035

09.2011.02.021  
09.2011.02.021

73671  
24/mol.107.042382  
/ol.2017.5895

r.2012.44

0.1016/j.mcp.2019.02.004  
6

038/cddis.2016.289  
0.1016/j.taap.2022.116035  
4  
4  
093/carcin/bgab037  
2  
b.29833

07

0.1186/s12935-021-02060-110.3322/caac.2149210.1038/s41572-020-00224-310.1186/s404

02

;  
;

04110.1016/j.urology.2008.09.041  
04110.1016/j.urology.2008.09.041

/CMAR.S172722

;

9  
04

;

.0. 1186/s13046-021-01854-5

.0. 1186/s13046-021-01989-5

hno. 55814

hno. 55814

.0. 1186/s13046-021-01989-510. 3322/caac. 2165410. 1038/ncb303810. 1016/j. eururo. 2016. 0

049

;

;

47814

07

;/onc. 2012. 355

;/onc. 2012. 355

u. 1285

.0. 1016/j. bbrc. 2015. 01. 017

06

.3

.5

.510. 1016/j. canlet. 2011. 01. 015

:/ol. 2017. 7326

l. 1186/s12935-019-1050-4

0. 1245/s10434-020-08518-2  
.8

.45  
l. 002

92/ijmm. 2021. 4887

9ra06378a

063

;  
710. 1016/j. canlet. 2020. 07. 027

92/mmr. 2020. 10986

052

l/neo\_2012\_070

;

038/cddis. 2016. 289

1186/1476-4598-13-190  
13/carcin/bgx059

18

1074/jbc.M111.277103  
1a.56135  
1a.56135

16

1.04.004

1/mmr.2011.426  
1/mmr.2011.426  
1/mmr.2011.426  
1.1016/j.abb.2012.07.003  
1.04.00410.1016/j.oraloncology.2014.04.004  
111/1440-1681.12672  
152108  
167

1/or.2015.3994  
1/or.2015.3994  
1/or.2015.3994

-X  
:86057  
:86057

0

;  
/iovs. 10-6973  
:8605710. 3727/096504015X14452563486057  
:8605710. 3727/096504015X14452563486057

.310. 1016/j. biopha. 2022. 112713  
/ol. 2018. 9205

;  
;  
;  
i. 04. 037

0

i8  
033656

l. 1007/s00432-008-0460-9  
l. 1007/s00292-009-1147-y  
4810. 1158/1535-7163. MCT-09-0148  
/i jms17010137  
l. 18632/oncotarget. 24091  
p. 27666  
2/etm. 2018. 7040

l. 1186/s12931-019-1071-5

0489759

:3  
:3

310.1016/j.canlet.2019.02.043

15

077

112

18

18

18

14

158

00010

11.20838

11.18969

11.2017.45.01310.3760/cma.j.issn.0376-2491.2017.45.013

11.18632/oncotarget.26637

11.21873/anticancer.13227

11.1810.26355/eurrev\_202005\_21168

11.10283210.1182/bloodadvances.2020002832

152

16

11.1111/or.2018.6628

11.1111/hno.45803

/CMAR. S172722

8

m4. 3841

2

.210. 1016/j. biopha. 2018. 10. 042

9

.0. 1186/s13046-020-01634-7

5

01. 037

01. 037

2. 009

6

6

/onc. 2008. 326

.18632/oncotarget. 13067

3

1

.0. 1016/j. bbrc. 2013. 01. 022

.0. 1186/s12885-021-09025-7

p4. 1114

.of. 1757

.07992

6



07577

049

;

;

;

;

47814

07029. 52

'07

;/onc. 2011. 588

;/onc. 2012. 355

'bc j. 2012. 46

04010. 1158/1535-7163. MCT-13-0040

0. 1016/j. bbrc. 2015. 01. 017

0710. 1371/ journal. pone. 0165107

l. 1007/s00018-013-1485-z

.52

'4

6

l. 1007/s00280-016-2964-3

l. 1007/s00280-016-2964-3

l. 1007/s00280-016-2964-3

:b. 26594

;/ol. 2017. 7237

1/ol. 2017. 7237  
5/hsz-2017-0274  
5/hsz-2017-0274  
0. 1186/s40659-020-00286-3

2  
9  
9  
910. 1371/journal.pone. 0093439

0. 1007/s11033-020-05411-9

92/mmr. 2022. 12617

410. 1016/j. biopha. 2011. 02. 004  
410. 1016/j. biopha. 2011. 02. 004

b. 24481  
1. 1186/s12943-015-0357-6

0. 1186/s13058-020-01302-w

9

1/or. 2017. 5984

i. 013

13

13

13

13

13

13

13

13

13

13

13

13

8

9

;

:310. 1007/978-1-4939-9220-1\_23

0

.0. 1016/j. bbrc. 2017. 06. 185

.0. 1016/j. bbrc. 2017. 06. 185

5

5

5

5

5

:510. 1097/CAD. 0000000000000225

02/etm. 2018. 7040

02/etm. 2018. 7040

:9610. 1158/1535-7163. MCT-13-0296

.0. 1038/s41419-021-04474-110. 1038/346240a010. 1038/346245a010. 1016/j. stem. 2012. 12. 0

.821

;

.2. 10. 525

7

4

:100405

:100405

2

2

2

2

2

doi:10.1007/s10930-011-9354-9  
Cancer. 2013. 88  
doi:10.1371/journal.pone.0079162  
Cancer. 2015. 4287  
doi:10.1186/s12935-020-01489-0

doi:10.1016/j.yexcr.2021.112734

doi:10.1016/j.bbrc.2021.01.029

doi:10.1016/j.cmar.2021.01.001

doi:10.1016/j.cmar.2021.01.001

i

0

018

















ac. 2155110. 1056/NEJMoa04333110. 1080/15548627. 2019. 159875210. 1096/fj. 201901021RR10  
ac. 2155110. 1056/NEJMoa04333110. 1080/15548627. 2019. 159875210. 1096/fj. 201901021RR10





1002/bies.2021010.1002/jcb.2561210.1111/jcmm.1412310.1007/978-3-030-43085-6\_410.1

































1038-310. 3109/07388551. 2015. 101595710. 1038/nature0592510. 1080/15548627. 2016. 116435



























!10.1093/jnci/djx21410.1097/GCO.00000000000033810.1016/j.tem.2013.12.00110.1016/j  
!10.1093/jnci/djx21410.1097/GCO.00000000000033810.1016/j.tem.2013.12.00110.1016/j  
!10.1093/jnci/djx21410.1097/GCO.00000000000033810.1016/j.tem.2013.12.00110.1016/j



016/j. mayocp. 2019. 01. 01310. 1172/jci3187110. 1016/s0140-6736(16)30958-810. 1016/j. bb





3023510.1053/j.gastro.2019.06.04710.1002/(SICI)1097-0142(19960115)77:2<255::AID-C  
3023510.1053/j.gastro.2019.06.04710.1002/(SICI)1097-0142(19960115)77:2<255::AID-C











:25-019-0662-510. 1016/j.oraloncology.2016.12.01010.1146/annurev-biochem-061516-044

06.02010.1001/jama.2020.1759810.1016/j.cub.2016.06.01110.1172/JCI13959710.1038/nsm

















0710. 1242/dev. 09179310. 1006/dbio. 2000. 988310. 1158/1078-0432. CCR-10-115510. 1002/cn



















l. 1093/neuonc/noy07210. 1007/s12035-011-8196-y10. 1038/nrg. 2015. 1010  
l. 1093/neuonc/noy07210. 1007/s12035-011-8196-y10. 1038/nrg. 2015. 1010







038/ncomms1215610.1016/j.cmet.2007.03.00710.18632/oncotarget.1278































910.21037/atm.2019.02.2210.1371/journal.pone.009015110.1038/onc.2



























l. arr. 2019. 10096110. 1007/s13277-015-3300-y10. 1002/cmdc. 20170041410  
l. arr. 2019. 10096110. 1007/s13277-015-3300-y10. 1002/cmdc. 20170041410  
l. arr. 2019. 10096110. 1007/s13277-015-3300-y10. 1002/cmdc. 20170041410



rc. 2006. 10. 11210. 1038/s41598-017-03368-710. 18632/oncotarget. 21022







NCR6>3. 0. CO;2-L10. 1038/cdd. 2014. 17010. 1158/1078-0432. CCR-16-25061  
NCR6>3. 0. CO;2-L10. 1038/cdd. 2014. 17010. 1158/1078-0432. CCR-16-25061









.91610.1016/j.trecan.2019.08.00510.1038/s41580-019-0099-110.1111/a

ib112810.1016/j.molcel.2017.10.01310.3389/fonc.2018.0050210.1038/n

















cr. 2656610. 1016/j. canep. 2013. 05. 00210. 1182/blood-2010-04-28235010
