# Supplementary material for: Role of PPARG in Chemosensitivity-Regulating Network for Hypopharyngeal Squamous Cell Carcinoma
Source: Hindawi journal article supplement (doi:10.1155/2023/6019318), 2023-09-25
Supplement: f3 [file 6019318.f3.pdf]

## Ref info supporting the HSCC-chemosensitivity regulating network

| Relation Name                | PMID     | DOI                                 |
|------------------------------|----------|-------------------------------------|
| Regulation: PPARG ---> MAPK1 | 30278161 | 10.1016/j.cbi.2018.09.019           |
| Regulation: PPARG ---> MAPK1 | 15649892 | 10.1074/jbc.M410445200              |
| Regulation: PPARG ---> MAPK1 | 16524877 | 10.1074/jbc.M513786200              |
| Regulation: PPARG ---> MAPK1 | 15632188 | 10.1074/jbc.M409447200              |
| Regulation: PPARG ---> MAPK1 | 18411276 | 10.1074/jbc.M705822200              |
| Regulation: PPARG ---> MAPK1 | 28527699 | 10.1016/j.phrs.2017.05.008          |
| Regulation: PPARG ---> MAPK1 | 27792919 | 10.1016/j.intimp.2016.09.028        |
| Regulation: PPARG ---> MAPK1 | 33539723 | 10.1016/j.stem.2020.12.008          |
| Regulation: PPARG ---> MAPK1 | 28580280 | 10.1016/j.molmet.2017.03.003        |
| Regulation: PPARG ---> MAPK1 | 22591774 | 10.1016/j.archoralbio.2012.04.015   |
| Regulation: PPARG ---> MAPK1 | 16945329 | 10.1016/j.bbrc.2006.08.085          |
| Regulation: PPARG ---> MAPK1 | 17583675 | 10.1016/j.bbrc.2007.05.222          |
| Regulation: PPARG ---> MAPK1 | 19397913 | 10.1016/j.yjmcc.2009.04.011         |
| Regulation: PPARG ---> MAPK1 | 19010350 | 10.1016/j.pharmthera.2008.10.002    |
| Regulation: PPARG ---> MAPK1 | 18848847 | 10.1016/j.bbamcr.2008.09.002        |
| Regulation: PPARG ---> MAPK1 | 20537761 | 10.1016/j.ejcb.2010.04.002          |
| Regulation: PPARG ---> MAPK1 | 18513951 | 10.1016/j.jsbmb.2008.04.005         |
| Regulation: PPARG ---> MAPK1 | 19443277 | 10.1016/j.clim.2009.04.004          |
| Regulation: PPARG ---> MAPK1 | 23219716 | 10.1016/j.ajpath.2012.10.007        |
| Regulation: PPARG ---> MAPK1 |          | 10.1016/j.jalz.2014.05.748          |
| Regulation: PPARG ---> MAPK1 | 25557278 | 10.1016/j.freeradbiomed.2014.12.019 |
| Regulation: PPARG ---> MAPK1 | 26607460 | 10.1016/j.ejphar.2015.11.040        |
| Regulation: PPARG ---> MAPK1 | 26556104 | 10.1016/j.cyto.2015.11.001          |
| Regulation: PPARG ---> MAPK1 | 18382765 |                                     |
| Regulation: PPARG ---> MAPK1 | 18411276 |                                     |
| Regulation: PPARG ---> MAPK1 | 18411276 |                                     |
| Regulation: PPARG ---> MAPK1 | 16971554 |                                     |
| Regulation: PPARG ---> MAPK1 | 16971554 |                                     |
| Regulation: PPARG ---> MAPK1 | 16524877 |                                     |
| Regulation: PPARG ---> MAPK1 | 16524877 |                                     |
| Regulation: PPARG ---> MAPK1 | 16524877 |                                     |
| Regulation: PPARG ---> MAPK1 | 15649892 |                                     |
| Regulation: PPARG ---> MAPK1 | 15632188 |                                     |
| Regulation: PPARG ---> MAPK1 | 11231915 |                                     |
| Regulation: PPARG ---> MAPK1 | 17389706 |                                     |
| Regulation: PPARG ---> MAPK1 | 25632270 | 10.1186/s12950-014-0044-1           |
| Regulation: PPARG ---> MAPK1 | 26818512 | 10.1523/JNEUROSCI.3280-15.2016      |
| Regulation: PPARG ---> MAPK1 | 27718123 | 10.1007/s13105-016-0523-3           |
| Regulation: PPARG ---> MAPK1 | 27718123 | 10.1007/s13105-016-0523-3           |
| Regulation: PPARG ---> MAPK1 | 27718123 | 10.1007/s13105-016-0523-3           |
| Regulation: PPARG ---> MAPK1 | 28673319 | 10.1186/s13046-017-0557-6           |
| Regulation: PPARG ---> MAPK1 | 28466688 | 10.1177/1074248417707049            |
| Regulation: PPARG ---> MAPK1 | 29350308 | 10.1007/s10549-017-4649-y           |
| Regulation: PPARG ---> MAPK1 | 28534168 | 10.1007/s00394-017-1473-4           |
| Regulation: PPARG ---> MAPK1 | 31233701 | 10.1071/RD19108                     |
| Regulation: PPARG ---> MAPK1 | 32417836 | 10.1159/000505209                   |
| Regulation: PPARG ---> MAPK1 | 32417836 | 10.1159/000505209                   |
| Regulation: PPARG ---> MAPK1 | 32417836 | 10.1159/000505209                   |
| Regulation: PPARG ---> MAPK1 | 32417836 | 10.1159/000505209                   |
| Regulation: PPARG ---> MAPK1 | 32417836 | 10.1159/000505209                   |
| Regulation: PPARG ---> MAPK1 | 32958825 | 10.1038/s41416-020-01088-w          |

Regulation: PPARG ----> MAPK1 32867639 10.2174/0929867327999200820173853  
 Regulation: PPARG ----> MAPK1 22502865 10.1186/1755-1536-5-5  
 Regulation: PPARG ----> MAPK1 22502865 10.1186/1755-1536-5-5  
 Regulation: PPARG ----> MAPK1 22426809 10.1007/s12253-012-9517-9  
 Regulation: PPARG ----> MAPK1 21208163 10.2174/156720211794520224  
 Regulation: PPARG ----> MAPK1 21532147 10.1248/bpb.34.618  
 Regulation: PPARG ----> MAPK1 21955520 10.1158/1940-6207.CAPR-11-0256  
 Regulation: PPARG ----> MAPK1 23175826 10.1523/JNEUROSCI.2153-12.2012  
 Regulation: PPARG ----> MAPK1 24259663 10.1242/jcs.128306  
 Regulation: PPARG ----> MAPK1 24092354 10.1007/978-3-642-38664-0-21  
 Regulation: PPARG ----> MAPK1 24623782 10.1523/JNEUROSCI.4024-13.2014  
 Regulation: PPARG ----> MAPK1 26398946 10.1242/dmm.021550  
 Regulation: PPARG ----> MAPK1 26398946 10.1242/dmm.021550  
 Regulation: PPARG ----> MAPK1 26398946 10.1242/dmm.021550  
 Regulation: PPARG ----> MAPK1 20300579 10.1155/2009/43867310.1155/2009/438673  
 Regulation: PPARG ----> MAPK1 20537761 10.1016/j.ejcb.2010.04.00210.1016/j.ejcb.2010  
 Regulation: PPARG ----> MAPK1 24623782 10.1523/JNEUROSCI.4024-13.201410.1523/JNEUROSCI  
 Regulation: PPARG ----> MAPK1 25557278 10.1016/j.freeradbiomed.2014.12.01910.1016/j.  
 Regulation: PPARG ----> MAPK1 26125905 10.4238/2015.June.26.510.4238/2015.June.26.5  
 Regulation: PPARG ----> MAPK1 30018246 10.3390/md1607023810.3390/md16070238  
 Regulation: PPARG ----> MAPK1 30189217 10.1016/j.lfs.2018.09.00410.1016/j.lfs.2018.0  
 Regulation: PPARG ----> MAPK1 31233701 10.1071/RD1910810.1071/RD19108  
 Regulation: PPARG ----> MAPK1 32417836 10.1159/00050520910.1159/000505209  
 Regulation: PPARG ----> MAPK1 10.1016/j.archoralbio.2012.04.015  
 Regulation: PPARG ----> MAPK1 10.1071/RD19108  
 Regulation: PPARG ----> MAPK1 10.1007/s12253-012-9517-9  
 Regulation: PPARG ----> MAPK1 10.2174/156720211794520224  
 Regulation: PPARG ----> MAPK1 10.1523/JNEUROSCI.4024-13.2014  
 Regulation: PPARG ----> MAPK1 25874449 10.1371/journal.pone.0123724  
 Regulation: PPARG ----> MAPK1 27084771 10.1007/s11064-016-1913-1  
 Regulation: PPARG ----> MAPK1 19142226  
 Regulation: PPARG ----> MAPK1 10.1016/j.archoralbio.2012.04.015  
 Regulation: PPARG ----> MAPK1 10.1016/j.archoralbio.2012.04.015  
 Regulation: PPARG ----> MAPK1 10.1016/j.bbrc.2004.08.101  
 Regulation: PPARG ----> MAPK1 18423937 10.1016/j.peptides.2008.03.001  
 Regulation: PPARG ----> MAPK1 21664456 10.1016/j.freeradbiomed.2011.05.027  
 Regulation: PPARG ----> MAPK1 22633083 10.1016/j.cyto.2012.04.042  
 Regulation: PPARG ----> MAPK1 22591774 10.1016/j.archoralbio.2012.04.015  
 Regulation: PPARG ----> MAPK1 22591774 10.1016/j.archoralbio.2012.04.015  
 Regulation: PPARG ----> MAPK1 25557278 10.1016/j.freeradbiomed.2014.12.019  
 Regulation: PPARG ----> MAPK1 25557278 10.1016/j.freeradbiomed.2014.12.019  
 Regulation: PPARG ----> MAPK1 25557278 10.1016/j.freeradbiomed.2014.12.019



positive Regulation: RAC1 --> Af 12393431 10.1182/blood-2002-04-1251  
positive Regulation: RAC1 --> Af 27018294 10.1016/j.brainres.2016.03.025  
positive Regulation: RAC1 --> Af 29129468 10.1016/j.expneurol.2017.10.030  
positive Regulation: RAC1 --> Af 33388318 10.1053/j.gastro.2020.12.061  
positive Regulation: RAC1 --> Af 25586182 10.1074/jbc.M114.633701  
positive Regulation: RAC1 --> Af 25586182 10.1074/jbc.M114.633701  
positive Regulation: RAC1 --> Af 16551621 10.1074/jbc.M513243200  
positive Regulation: RAC1 --> Af 17519230 10.1074/jbc.M702182200  
positive Regulation: RAC1 --> Af 17519230 10.1074/jbc.M702182200  
positive Regulation: RAC1 --> Af 17519230 10.1074/jbc.M702182200  
positive Regulation: RAC1 --> Af 23640896 10.1074/jbc.M113.467647  
positive Regulation: RAC1 --> Af 16698790 10.1074/jbc.M603508200  
positive Regulation: RAC1 --> Af 25378391 10.1074/jbc.M114.593285  
positive Regulation: RAC1 --> Af 15677464 10.1074/jbc.M411625200  
positive Regulation: RAC1 --> Af 17604276 10.1074/jbc.M703132200  
positive Regulation: RAC1 --> Af 15579468 10.1074/jbc.M410508200  
positive Regulation: RAC1 --> Af 16339142 10.1074/jbc.M510434200  
positive Regulation: RAC1 --> Af 11689561 10.1074/jbc.M107474200  
positive Regulation: RAC1 --> Af 32244053 10.1016/j.gene.2020.144635  
positive Regulation: RAC1 --> Af 31018152 10.1016/j.toxlet.2019.04.017  
positive Regulation: RAC1 --> Af 31018152 10.1016/j.toxlet.2019.04.017  
positive Regulation: RAC1 --> Af 29329780 10.1016/j.cellsig.2018.01.004  
positive Regulation: RAC1 --> Af 29329780 10.1016/j.cellsig.2018.01.004  
positive Regulation: RAC1 --> Af 33152487 10.1016/j.semancer.2020.10.012  
positive Regulation: RAC1 --> Af 27453460 10.1016/j.pan.2016.07.002  
positive Regulation: RAC1 --> Af 31257073 10.1016/j.ccell.2019.05.015  
positive Regulation: RAC1 --> Af 31257073 10.1016/j.ccell.2019.05.015  
positive Regulation: RAC1 --> Af 31257073 10.1016/j.ccell.2019.05.015  
positive Regulation: RAC1 --> Af 28007913 10.1074/mcp.M116.064428  
positive Regulation: RAC1 --> Af 30590131 10.1016/j.jprot.2018.12.019  
positive Regulation: RAC1 --> Af 32460002 10.1016/j.trecan.2020.02.021  
positive Regulation: RAC1 --> Af 32460002 10.1016/j.trecan.2020.02.021  
positive Regulation: RAC1 --> Af 15093747 10.1016/j.yexcr.2004.02.002  
positive Regulation: RAC1 --> Af 15093747 10.1016/j.yexcr.2004.02.002  
positive Regulation: RAC1 --> Af 17292356 10.1016/j.exer.2006.12.012  
positive Regulation: RAC1 --> Af 20538003 10.1016/j.yjmcc.2010.05.007  
positive Regulation: RAC1 --> Af 20538003 10.1016/j.yjmcc.2010.05.007  
positive Regulation: RAC1 --> Af 21925199 10.1016/j.advenzreg.2011.09.001  
positive Regulation: RAC1 --> Af 19118901 10.1016/j.molimm.2008.11.006  
positive Regulation: RAC1 --> Af 18086571 10.1016/j.bbamcr.2007.10.024  
positive Regulation: RAC1 --> Af 20144672 10.1016/j.neuint.2010.01.015  
positive Regulation: RAC1 --> Af 20307615 10.1016/j.neuint.2010.03.005  
positive Regulation: RAC1 --> Af 20307615 10.1016/j.neuint.2010.03.005  
positive Regulation: RAC1 --> Af 15388231 10.1016/j.biochi.2004.07.008  
positive Regulation: RAC1 --> Af 15013523 10.1016/j.canlet.2003.08.035  
positive Regulation: RAC1 --> Af 20074642 10.1016/j.cellsig.2010.01.001

positive Regulation: RAC1 --> Af20074642 10.1016/j.cellsig.2010.01.001  
positive Regulation: RAC1 --> Af20074642 10.1016/j.cellsig.2010.01.001  
positive Regulation: RAC1 --> Af20074642 10.1016/j.cellsig.2010.01.001  
positive Regulation: RAC1 --> Af21683139 10.1016/j.cellsig.2011.05.022  
positive Regulation: RAC1 --> Af21251810 10.1016/j.gde.2010.12.004  
positive Regulation: RAC1 --> Af15752980 10.1016/j.tcb.2005.01.002  
positive Regulation: RAC1 --> Af21474067 10.1016/j.molcel.2011.03.017  
positive Regulation: RAC1 --> Af20060361 10.1016/j.coph.2009.11.004  
positive Regulation: RAC1 --> Af12086876 10.1016/S1535-6108(02)00033-8  
positive Regulation: RAC1 --> Af23623748 10.1016/j.cmet.2013.03.017  
positive Regulation: RAC1 --> Af23706742 10.1016/j.cell.2013.04.031  
positive Regulation: RAC1 --> Af23706742 10.1016/j.cell.2013.04.031  
positive Regulation: RAC1 --> Af24216610 10.1016/j.cellsig.2013.11.007  
positive Regulation: RAC1 --> Af24508121 10.1016/j.bbagen.2014.01.033  
positive Regulation: RAC1 --> Af24508121 10.1016/j.bbagen.2014.01.033  
positive Regulation: RAC1 --> Af24880064 10.1016/j.cellsig.2014.05.015  
positive Regulation: RAC1 --> Af24721474 10.1016/j.semcd.2014.04.008  
positive Regulation: RAC1 --> Af19129452 10.1128/JVI.01972-0810.1128/JVI.01972-08  
positive Regulation: RAC1 --> Af32275841 10.1080/15384101.2020.174979010.1080/15384101  
positive Regulation: RAC1 --> Af31257073 10.1016/j.ccell.2019.05.01510.1016/j.ccell.20  
positive Regulation: RAC1 --> Af18579797 10.1182/blood-2008-01-13206810.1182/blood-200  
positive Regulation: RAC1 --> Af19293637 10.3858/emm.2009.41.3.02110.3858/emm.2009.41.  
positive Regulation: RAC1 --> Af23554696 10.1016/S1674-8301(11)60032-810.1016/S1674-83  
positive Regulation: RAC1 --> Af32823607 10.3390/ijms21165812  
positive Regulation: RAC1 --> AKT1 10.1016/j.trecan.2020.02.021  
positive Regulation: RAC1 --> AKT1 10.1016/j.trecan.2020.02.021  
positive Regulation: RAC1 --> AKT1 10.1016/j.advenzreg.2011.09.001  
positive Regulation: RAC1 --> AKT1 10.1016/j.cellsig.2010.01.001  
positive Regulation: RAC1 --> Af25022196 10.1016/j.cytogfr.2014.06.002  
positive Regulation: RAC1 --> Af26463037 10.1016/j.ejphar.2015.10.018  
positive Regulation: RAC1 --> Af25843002 10.1016/j.ccell.2015.02.014  
positive Regulation: RAC1 --> Af16321803  
positive Regulation: RAC1 --> Af19497102  
positive Regulation: RAC1 --> Af17855349  
positive Regulation: RAC1 --> Af17604276  
positive Regulation: RAC1 --> Af17519230  
positive Regulation: RAC1 --> Af17519230  
positive Regulation: RAC1 --> Af16774691  
positive Regulation: RAC1 --> Af16551621  
positive Regulation: RAC1 --> Af16339142  
positive Regulation: RAC1 --> Af16014609  
positive Regulation: RAC1 --> Af15677464

positive Regulation: RAC1 --> Af 15579468  
positive Regulation: RAC1 --> Af 11805146  
positive Regulation: RAC1 --> Af 11689561  
positive Regulation: RAC1 --> Af 11369774  
positive Regulation: RAC1 --> Af 11369774  
positive Regulation: RAC1 --> Af 18599867  
positive Regulation: RAC1 --> Af 15027896  
positive Regulation: RAC1 --> Af 11803464  
positive Regulation: RAC1 --> Af 19179620  
positive Regulation: RAC1 --> Af 19179620  
positive Regulation: RAC1 --> Af 17804488  
positive Regulation: RAC1 --> Af 17804488  
positive Regulation: RAC1 --> Af 17682064  
positive Regulation: RAC1 --> Af 16798728  
positive Regulation: RAC1 --> Af 16798728  
positive Regulation: RAC1 --> Af 16798728  
positive Regulation: RAC1 --> Af 16670255  
positive Regulation: RAC1 --> Af 15226424  
positive Regulation: RAC1 --> Af 12842860  
positive Regulation: RAC1 --> Af 32432925 10.1152/ajpcell.00505.2019  
positive Regulation: RAC1 --> Af 32432925 10.1152/ajpcell.00505.2019  
positive Regulation: RAC1 --> Af 32432925 10.1152/ajpcell.00505.2019  
positive Regulation: RAC1 --> Af 32568828 10.1097/CAD.00000000000096110.1097/CAD.00000  
positive Regulation: RAC1 --> Af 12842860  
positive Regulation: RAC1 --> Af 12842860  
positive Regulation: RAC1 --> AKT1 10.1074/mcp.M116.064428  
positive Regulation: RAC1 --> Af 29749029 10.1113/JP27560210.1113/JP275602  
positive Regulation: RAC1 --> Af 9601639 10.1016/S0960-9822(98)70224-6  
positive Regulation: RAC1 --> Af 24216610 10.1016/j.cellsig.2013.11.007  
positive Regulation: RAC1 --> Af 16698790  
positive Regulation: RAC1 --> Af 16339142  
positive Regulation: RAC1 --> Af 10973919  
positive Regulation: RAC1 --> Af 16514078  
positive Regulation: RAC1 --> Af 27726098 10.1007/s13277-016-5374-6  
positive Regulation: RAC1 --> Af 28805822 10.1038/nm.4379  
positive Regulation: RAC1 --> AKT1 10.1042/BCJ20170279  
positive Regulation: RAC1 --> Af 21984807 10.1242/jcs.092601  
positive Regulation: RAC1 --> Af 21537609 10.1590/S0100-879X2011007500057  
positive Regulation: RAC1 --> Af 21110188 10.1007/s00223-010-9435-3  
positive Regulation: RAC1 --> Af 21110188 10.1007/s00223-010-9435-3  
positive Regulation: RAC1 --> Af 17467682 10.1016/j.ydbio.2007.03.520  
positive Regulation: RAC1 --> Af 15093747 10.1016/j.yexpr.2004.02.002  
positive Regulation: RAC1 --> Af 20538003 10.1016/j.yjmcc.2010.05.007  
positive Regulation: RAC1 --> Af 17188364 10.1016/j.brainresrev.2006.09.004  
positive Regulation: RAC1 --> Af 15752980 10.1016/j.tcb.2005.01.002

positive Regulation: RAC1 --> Af 12621032  
positive Regulation: RAC1 --> Af 11369774  
positive Regulation: RAC1 --> Af 11956329  
positive Regulation: RAC1 --> Af 20811053 10.1167/iov.10-6140  
positive Regulation: RAC1 --> Af 22207728 10.1161/ATVBAHA.111.243675  
positive Regulation: RAC1 --> Af 22207728 10.1161/ATVBAHA.111.243675  
positive Regulation: RAC1 --> Af 22207728 10.1161/ATVBAHA.111.243675  
positive Regulation: RAC1 --> Af 22995516 10.1161/ATVBAHA.112.254920  
positive Regulation: RAC1 --> Af 22995516 10.1161/ATVBAHA.112.254920  
positive Regulation: RAC1 --> Af 23446149 10.1189/jlb.0912473  
positive Regulation: RAC1 --> Af 23640896 10.1074/jbc.M113.467647  
positive Regulation: RAC1 --> Af 21339740 10.1038/onc.2011.22  
positive Regulation: RAC1 --> Af 21339740 10.1038/onc.2011.22  
positive Regulation: RAC1 --> Af 21455314 10.1371/journal.pone.0018002  
positive Regulation: RAC1 --> Af 20124168 10.1200/JCO.2009.25.8624  
positive Regulation: RAC1 --> Af 22723286 10.1099/mic.0.059972-0  
positive Regulation: RAC1 --> Af 23898047 10.1189/jlb.0313174  
positive Regulation: RAC1 --> Af 23919665 10.1089/ars.2013.5526  
positive Regulation: RAC1 --> Af 22668020 10.4149/neo\_2012\_070  
positive Regulation: RAC1 --> Af 24604047  
positive Regulation: RAC1 --> Af 24667766 10.1371/journal.pone.0092398  
positive Regulation: RAC1 --> Af 24667766 10.1371/journal.pone.0092398  
positive Regulation: RAC1 --> Af 24667766 10.1371/journal.pone.0092398  
positive Regulation: RAC1 --> Af 24571616 10.1186/1742-4690-11-20  
positive Regulation: RAC1 --> AKT1 10.1172/JCI73579  
positive Regulation: RAC1 --> Af 25268615 10.3390/ijms151017411  
positive Regulation: RAC1 --> Af 23686855 10.1152/ajplung.00298.2012  
positive Regulation: RAC1 --> Af 23686855 10.1152/ajplung.00298.2012  
positive Regulation: RAC1 --> AKT1 10.1074/jbc.M114.633701  
positive Regulation: RAC1 --> Af 23817184 10.1159/000350108  
positive Regulation: RAC1 --> Af 23817184 10.1159/000350108  
positive Regulation: RAC1 --> AKT1  
positive Regulation: RAC1 --> Af 25968904 10.1038/ncomms8166  
positive Regulation: RAC1 --> Af 10891487  
positive Regulation: RAC1 --> Af 10891487  
positive Regulation: RAC1 --> Af 11803464  
positive Regulation: RAC1 --> Af 14685694  
positive Regulation: RAC1 --> Af 15187145





positive Regulation: RAC1 --> Af 33081375 10.3390/ijms2120767910.3390/ijms21207679  
 positive Regulation: RAC1 --> Af 33081375 10.3390/ijms21207679  
 positive Regulation: RAC1 --> Af 32772212 10.1007/s10555-020-09923-5  
 positive Regulation: RAC1 --> Af 33318149 10.1242/dev.184341  
 positive Regulation: RAC1 --> Af 33318149 10.1242/dev.184341  
 positive Regulation: RAC1 --> Af 33879799 10.1038/s41467-021-22531-3  
 positive Regulation: RAC1 --> Af 34882832 10.1096/fj.202100554R  
 positive Regulation: RAC1 --> Af 35462099 10.1016/j.bbrc.2022.03.15210.1016/j.bbrc.2022  
 positive Regulation: RAC1 --> Af 35962329 10.1186/s10020-022-00511-7  
 positive Regulation: RAC1 --> Af 35796938 10.1007/s13577-022-00733-1  
 positive Regulation: RAC1 --> Af 35816228 10.1007/s13577-022-00745-x  
 positive Regulation: RAC1 --> Af 35816228 10.1007/s13577-022-00745-x  
 positive Regulation: RAC1 --> Af 36045410 10.1186/s12931-022-02153-z  
 positive Regulation: RAC1 --> AKT1 10.7150/ijms.76664  
 positive Regulation: ADCY8 --> M18448650  
 Binding: GPER1 ---- PTEN 23921077 10.1016/j.steroids.2013.07.007  
 negative Expression: GRK4 ---| BF33280021 10.1093/eurheartj/ehaa878  
 negative Expression: UCA1 ---| NC31301558 10.1016/j.intimp.2019.105734  
 positive Regulation: UPK1A --> M25978409 10.1371/journal.pgen.1005221  
 Regulation: PRND ---> AKT1 32895288 10.1242/dev.193094  
 Regulation: PRND ---> AKT1 26950422 10.1172/JCI83427  
 Regulation: PRND ---> AKT1 26950422 10.1172/JCI83427  
 Regulation: PRND ---> AKT1 26950422 10.1172/JCI83427  
 Expression: MAPK1 ---> NET1 21986943 10.1038/onc.2011.457  
 Expression: MAPK1 ---> NET1 21986943 10.1038/onc.2011.457  
 negative Regulation: CD274 ---| F28231855 10.1186/s12967-017-1150-7  
 negative Regulation: CD274 ---| F28231855 10.1186/s12967-017-1150-710.1186/s12967-017-1  
 positive Expression: SPP1 --> Af29079264 10.1016/j.yexcr.2017.10.018  
 positive Expression: SPP1 --> Af28935249 10.1016/j.lfs.2017.09.019  
 positive Expression: SPP1 --> Af31879711 10.1016/j.heliyon.2019.e03006  
 positive Expression: SPP1 --> Af24999034 10.1016/j.bbagr.2014.06.020  
 positive Expression: SPP1 --> Af25732057 10.1016/j.bbcan.2015.02.003  
 positive Expression: SPP1 --> Af25732057 10.1016/j.bbcan.2015.02.003  
 positive Expression: SPP1 --> AKT1 10.12659/MSM.905700  
 positive Expression: SPP1 --> AKT1 10.12659/MSM.905700  
 positive Expression: SPP1 --> Af30627777 10.1007/s00280-018-3759-5  
 positive Expression: SPP1 --> Af30627777 10.1007/s00280-018-3759-5  
 positive Expression: SPP1 --> Af28032860 10.1038/cddis.2016.422  
 positive Expression: SPP1 --> Af31295749 10.1055/a-0926-3991  
 positive Expression: SPP1 --> Af24714722 10.3892/ijo.2014.2370  
 positive Expression: SPP1 --> Af24714722 10.3892/ijo.2014.2370  
 positive Expression: SPP1 --> Af24961145 10.1186/1756-9966-33-53  
 positive Expression: SPP1 --> Af26099282 10.3892/mmr.2015.3975  
 positive Expression: SPP1 --> Af19597469 10.1038/onc.2009.18910.1038/onc.2009.189  
 positive Expression: SPP1 --> Af24999034 10.1016/j.bbagr.2014.06.02010.1016/j.bbagr.

positive Expression: SPP1 --> AF27063991 10.1016/j.lfs.2016.04.00310.1016/j.lfs.2016.0  
positive Expression: SPP1 --> AF28875010  
positive Expression: SPP1 --> AF29550832 10.12659/msm.905700  
positive Expression: SPP1 --> AF28505114 10.3390/ijms18051058  
positive Expression: SPP1 --> AKT1 10.1007/s00280-018-3759-5  
positive Expression: SPP1 --> AKT1 10.1007/s00280-018-3759-5  
negative Expression: SNCAIP ---| 16495229 10.1074/jbc.M508619200  
negative Expression: SNCAIP ---| 20807766 10.1074/jbc.M110.169581  
negative Expression: SNCAIP ---| 16495229  
negative Expression: SNCAIP ---| 16495229  
negative Expression: SNCAIP ---| 20807766 10.1074/jbc.M110.169581  
negative Expression: SNCAIP ---| 16495229 10.1074/jbc.M508619200  
negative Expression: SNCAIP ---| 22832581 10.1038/nature11327  
positive Expression: AKT1 --> SF16807238 10.1074/jbc.M602694200  
positive Expression: AKT1 --> SF30107166 10.1016/j.lfs.2018.08.025  
positive Expression: AKT1 --> SF27496181 10.1016/j.pbiomolbio.2016.08.003  
positive Expression: AKT1 --> SF27794492 10.1016/j.jconrel.2016.10.024  
positive Expression: AKT1 --> SF32858177 10.1016/j.gene.2020.145059  
positive Expression: AKT1 --> SF19356721 10.1016/j.ejphar.2009.03.063  
positive Expression: AKT1 --> SF19356721 10.1016/j.ejphar.2009.03.063  
positive Expression: AKT1 --> SF19767100 10.1016/j.leukres.2009.08.028  
positive Expression: AKT1 --> SF21056654 10.1016/j.cellsig.2010.10.021  
positive Expression: AKT1 --> SF21056654 10.1016/j.cellsig.2010.10.021  
positive Expression: AKT1 --> SF18952487 10.1016/j.cytogfr.2008.08.001  
positive Expression: AKT1 --> SF17161983 10.1016/j.dld.2006.10.015  
positive Expression: AKT1 --> SF22947282 10.1016/j.acthis.2012.08.004  
positive Expression: AKT1 --> SF24530412 10.1016/j.intimp.2014.01.028  
positive Expression: AKT1 --> SF25986148 10.1016/j.yjmcc.2015.05.006  
positive Expression: AKT1 --> SF25986148 10.1016/j.yjmcc.2015.05.006  
positive Expression: AKT1 --> SF16946008  
positive Expression: AKT1 --> SF16807238  
positive Expression: AKT1 --> SF15347645  
positive Expression: AKT1 --> SF15854023  
positive Expression: AKT1 --> SF12944477  
positive Expression: AKT1 --> SF28715969 10.1089/ars.2017.7275  
positive Expression: AKT1 --> SF29620276 10.3892/mmr.2018.8845  
positive Expression: AKT1 --> SF22965338 10.3892/mmr.2012.1074  
positive Expression: AKT1 --> SF22965338 10.3892/mmr.2012.1074  
positive Expression: AKT1 --> SF21406114 10.1186/1471-2121-12-11  
positive Expression: AKT1 --> SF22675553 10.1371/journal.pone.0038378  
positive Expression: AKT1 --> SF22675553 10.1371/journal.pone.0038378

positive Expression: AKT1 --> SF 22675553 10.1371/journal.pone.0038378  
positive Expression: AKT1 --> SF 25884410 10.1371/journal.pone.0123318  
positive Expression: AKT1 --> SF 26280346 10.1371/journal.pone.0134243  
positive Expression: AKT1 --> SF 12944477 10.1128/mcb.23.18.6507-6519.2003  
positive Expression: AKT1 --> SF 12944477 10.1128/mcb.23.18.6507-6519.2003  
positive Expression: AKT1 --> SF 15705860  
positive Expression: AKT1 --> SF 15705860  
positive Expression: AKT1 --> SF 16614705  
positive Expression: AKT1 --> SF 21406114 10.1186/1471-2121-12-1110.1186/1471-2121-12-1  
positive Expression: AKT1 --> SF 24530412 10.1016/j.intimp.2014.01.02810.1016/j.intimp.  
positive Expression: AKT1 --> SF 34234236 10.1038/s41598-021-93484-210.1038/s41598-021-  
positive Expression: AKT1 --> SF 17287359  
positive Expression: AKT1 --> SF 21337710 10.1002/ar.2132410.1002/ar.21324  
Regulation: PTGS2 ---> NGF 19129380  
Regulation: PTGS2 ---> NGF 10.1097/BRS.0000000000001379  
Regulation: PTGS2 ---> NGF 16879691 10.1111/j.1464-410X.2006.06207.x  
Regulation: PTGS2 ---> NGF 23799042 10.1371/journal.pone.006575110.1371/journal.p  
Regulation: PTGS2 ---> NGF 26876621 10.1016/j.jos.2016.01.00410.1016/j.jos.2016.0  
Regulation: PTGS2 ---> NGF 28759126 10.1111/sms.1295410.1111/sms.12954  
ProtModification: AKT1 ---> RAC1 11733515 10.1074/jbc.M108233200  
ProtModification: AKT1 ---> RAC1 14960575 10.1074/jbc.M400905200  
ProtModification: AKT1 ---> RAC1 31669133 10.1016/j.semcd.2019.10.007  
ProtModification: AKT1 ---> RAC1 16018989 10.1016/j.brainres.2005.05.043  
ProtModification: AKT1 ---> RAC1 17399794 10.1016/j.pharmthera.2007.02.002  
ProtModification: AKT1 ---> RAC1 18191273 10.1016/j.jhep.2007.11.018  
ProtModification: AKT1 ---> RAC1 18255190 10.1016/j.neurobiolaging.2007.12.015  
ProtModification: AKT1 ---> RAC1 15013523 10.1016/j.canlet.2003.08.035  
ProtModification: AKT1 ---> RAC1 16973299 10.1016/j.neuroscience.2006.07.049  
ProtModification: AKT1 ---> RAC1 16973299 10.1016/j.neuroscience.2006.07.049  
ProtModification: AKT1 ---> RAC1 16973299 10.1016/j.neuroscience.2006.07.049  
ProtModification: AKT1 ---> RAC1 22572609 10.1016/j.tcb.2012.04.004  
ProtModification: AKT1 ---> RAC1 16839863 10.1016/j.tcm.2006.03.010  
ProtModification: AKT1 ---> RAC1 14523036  
ProtModification: AKT1 ---> RAC1 16195373 10.1096/fj.05-3928com  
ProtModification: AKT1 ---> RAC1 14960575 10.1074/jbc.M400905200  
ProtModification: AKT1 ---> RAC1 10617634  
ProtModification: AKT1 ---> RAC1 11686294  
ProtModification: AKT1 ---> RAC1 12728249

ProtModification: AKT1 ---> RAC1 19889994 10.1523/JNEUROSCI.3574-09.2009  
 ProtModification: AKT1 ---> RAC1 27600824 10.1152/ajpendo.00189.2016  
 ProtModification: AKT1 ---> RAC1 29036929 10.3390/ijms18102148  
 ProtModification: AKT1 ---> RAC1 29036929 10.3390/ijms18102148  
 ProtModification: AKT1 ---> RAC1 31248165 10.3390/ijms20122997  
 ProtModification: AKT1 ---> RAC1 23512198 10.1096/fj.12-223099  
 ProtModification: AKT1 ---> RAC1 24043306 10.1128/MCB.00822-13  
 ProtModification: AKT1 ---> RAC1 24043306 10.1128/MCB.00822-13  
 ProtModification: AKT1 ---> RAC1 26816343 10.1371/journal.pone.0147103  
 ProtModification: AKT1 ---> RAC1 10617634 10.1074/jbc.275.1.423  
 ProtModification: AKT1 ---> RAC1 10617634 10.1074/jbc.275.1.423  
 ProtModification: AKT1 ---> RAC1 23512198 10.1096/fj.12-223099  
 ProtModification: AKT1 ---> RAC1 10617634 10.1074/jbc.275.1.423  
 ProtModification: AKT1 ---> RAC1 24043306 10.1128/MCB.00822-13  
 ProtModification: AKT1 ---> RAC1 29036929 10.3390/ijms18102148  
 ProtModification: AKT1 ---> RAC1 16839863 10.1016/j.tcm.2006.03.010  
 ProtModification: AKT1 ---> RAC1 14960575 10.1074/jbc.M400905200  
 ProtModification: AKT1 ---> RAC1 18255190 10.1016/j.neurobiolaging.2007.12.015  
 ProtModification: AKT1 ---> RAC1 16973299 10.1016/j.neuroscience.2006.07.049  
 ProtModification: AKT1 ---> RAC1 22572609 10.1016/j.tcb.2012.04.004  
 ProtModification: AKT1 ---> RAC1 15013523 10.1016/j.canlet.2003.08.035  
 ProtModification: AKT1 ---> RAC1 26816343 10.1371/journal.pone.0147103  
 ProtModification: AKT1 ---> RAC1 18191273 10.1016/j.jhep.2007.11.018  
 ProtModification: AKT1 ---> RAC1 17399794 10.1016/j.pharmthera.2007.02.002  
 ProtModification: AKT1 ---> RAC1 27600824 10.1152/ajpendo.00189.2016  
 ProtModification: AKT1 ---> RAC1 16018989 10.1016/j.brainres.2005.05.043  
 ProtModification: AKT1 ---> RAC1 19889994 10.1523/JNEUROSCI.3574-09.2009  
 ProtModification: AKT1 ---> RAC1 16195373 10.1096/fj.05-3928com  
 ProtModification: AKT1 ---> RAC1 12728249 10.1038/sj.cdd.4401172  
 ProtModification: AKT1 ---> RAC1 22970203 10.1371/journal.pone.0044358  
 ProtModification: AKT1 ---> RAC1 11134000 10.1074/jbc.M004617200  
 ProtModification: AKT1 ---> RAC1 100427475 10.1016/j.tcb.2012.04.004  
 ProtModification: AKT1 ---> RAC1 10.1016/j.semcd.2019.10.007  
 ProtModification: AKT1 ---> RAC1 100427475 10.1016/j.tcb.2012.04.004  
 ProtModification: AKT1 ---> RAC1 10.3390/ijms20122997  
 ProtModification: AKT1 ---> RAC1  
 ProtModification: AKT1 ---> RAC1 12728249 10.1038/sj.cdd.4401172  
 ProtModification: AKT1 ---> RAC1 22970203 10.1371/journal.pone.0044358  
 ProtModification: AKT1 ---> RAC1 11134000 10.1074/jbc.M004617200  
 ProtModification: AKT1 ---> RAC1 18255190 10.1016/j.neurobiolaging.2007.12.015  
 ProtModification: AKT1 ---> RAC1 10617634  
 ProtModification: AKT1 ---> RAC1 12728249  
 ProtModification: AKT1 ---> RAC1 23512198 10.1096/fj.12-223099  
 Expression: MAPK1 ---> PPARG 26940012 10.1016/j.yexcr.2016.02.019  
 Expression: MAPK1 ---> PPARG 30573683 10.1074/jbc.RA118.004411  
 Expression: MAPK1 ---> PPARG 30573683 10.1074/jbc.RA118.004411  
 Expression: MAPK1 ---> PPARG 30573683 10.1074/jbc.RA118.004411  
 Expression: MAPK1 ---> PPARG 24550383 10.1074/jbc.M113.546382  
 Expression: MAPK1 ---> PPARG 16574647 10.1074/jbc.M602623200  
 Expression: MAPK1 ---> PPARG 29656183 10.1016/j.biopha.2018.04.014

Expression: MAPK1 ----> PPARG 26872696 10.1016/j.immuni.2016.01.002  
 Expression: MAPK1 ----> PPARG 10.1016/j.chmed.2018.01.009  
 Expression: MAPK1 ----> PPARG 29198236 10.1017/S1751731117003275  
 Expression: MAPK1 ----> PPARG 28580280 10.1016/j.molmet.2017.03.003  
 Expression: MAPK1 ----> PPARG 16945329 10.1016/j.bbrc.2006.08.085  
 Expression: MAPK1 ----> PPARG 17173860 10.1016/j.bbrc.2006.11.137  
 Expression: MAPK1 ----> PPARG 17331472 10.1016/j.bbrc.2007.02.057  
 Expression: MAPK1 ----> PPARG 17543283 10.1016/j.bbrc.2007.05.070  
 Expression: MAPK1 ----> PPARG 18983975 10.1016/j.bbrc.2008.10.131  
 Expression: MAPK1 ----> PPARG 21439945 10.1016/j.bcp.2011.03.012  
 Expression: MAPK1 ----> PPARG 18037376 10.1016/j.febslet.2007.11.051  
 Expression: MAPK1 ----> PPARG 19385085 10.1016/j.lfs.2009.01.018  
 Expression: MAPK1 ----> PPARG 19385085 10.1016/j.lfs.2009.01.018  
 Expression: MAPK1 ----> PPARG 20346961 10.1016/j.lfs.2010.03.010  
 Expression: MAPK1 ----> PPARG 20553736 10.1016/j.lfs.2010.05.007  
 Expression: MAPK1 ----> PPARG 20553736 10.1016/j.lfs.2010.05.007  
 Expression: MAPK1 ----> PPARG 21315734 10.1016/j.lfs.2011.02.001  
 Expression: MAPK1 ----> PPARG 10.1016/S0041-008X(03)00083-8  
 Expression: MAPK1 ----> PPARG 10.1016/S0041-008X(03)00083-8  
 Expression: MAPK1 ----> PPARG 10.1016/S0041-008X(03)00083-8  
 Expression: MAPK1 ----> PPARG 22137902 10.1016/j.fct.2011.11.020  
 Expression: MAPK1 ----> PPARG 18790715 10.1016/j.mce.2008.08.018  
 Expression: MAPK1 ----> PPARG 10.1016/j.foodchem.2010.08.052  
 Expression: MAPK1 ----> PPARG 21333731 10.1016/j.tiv.2011.02.004  
 Expression: MAPK1 ----> PPARG 21664967 10.1016/j.cellsig.2011.05.018  
 Expression: MAPK1 ----> PPARG 21447440 10.1016/j.jnutbio.2010.11.016  
 Expression: MAPK1 ----> PPARG 23058985 10.1016/j.bcp.2012.09.033  
 Expression: MAPK1 ----> PPARG 23058985 10.1016/j.bcp.2012.09.033  
 Expression: MAPK1 ----> PPARG 22981159 10.1016/j.npep.2012.08.006  
 Expression: MAPK1 ----> PPARG 23684777 10.1016/j.freeradbiomed.2013.05.013  
 Expression: MAPK1 ----> PPARG 25562427 10.1016/j.cellsig.2014.12.018  
 Expression: MAPK1 ----> PPARG 26796578 10.1016/j.lfs.2016.01.024  
 Expression: MAPK1 ----> PPARG 26631505 10.1016/j.lfs.2015.11.028  
 Expression: MAPK1 ----> PPARG 18703634  
 Expression: MAPK1 ----> PPARG 17312274  
 Expression: MAPK1 ----> PPARG 16574647  
 Expression: MAPK1 ----> PPARG 15067015  
 Expression: MAPK1 ----> PPARG 18320708  
 Expression: MAPK1 ----> PPARG 15252128  
 Expression: MAPK1 ----> PPARG 12457461  
 Expression: MAPK1 ----> PPARG 17210639  
 Expression: MAPK1 ----> PPARG 15657420  
 Expression: MAPK1 ----> PPARG 15486348  
 Expression: MAPK1 ----> PPARG 27669202 10.3390/molecules21101278  
 Expression: MAPK1 ----> PPARG 28840539 10.1007/s12272-017-0948-4  
 Expression: MAPK1 ----> PPARG 28922143 10.3233/CH-170246  
 Expression: MAPK1 ----> PPARG 29283422 10.3390/ijms19010090  
 Expression: MAPK1 ----> PPARG 29283422 10.3390/ijms19010090  
 Expression: MAPK1 ----> PPARG 29283422 10.3390/ijms19010090  
 Expression: MAPK1 ----> PPARG 29589999 10.1089/thy.2017.0338  
 Expression: MAPK1 ----> PPARG 29990990 10.1159/000491619  
 Expression: MAPK1 ----> PPARG 30249030 10.3390/molecules23102433  
 Expression: MAPK1 ----> PPARG 30244245 10.1159/000492415  
 Expression: MAPK1 ----> PPARG 30431093 10.3892/mmr.2018.9627

Expression: MAPK1 ----> PPARG 30573683 10.1074/jbc.RA118.004411  
 Expression: MAPK1 ----> PPARG 30647194 10.21775/cimb.031.001  
 Expression: MAPK1 ----> PPARG 31292134 10.2337/db18-1055  
 Expression: MAPK1 ----> PPARG 31292134 10.2337/db18-1055  
 Expression: MAPK1 ----> PPARG 31292134 10.2337/db18-1055  
 Expression: MAPK1 ----> PPARG 34634123 10.1093/jas/skab287  
 Expression: MAPK1 ----> PPARG 19191008 10.1007/s11010-009-0027-310.1007/s11010-009-0  
 Expression: MAPK1 ----> PPARG 19191008 10.1007/s11010-009-0027-310.1007/s11010-009-0  
 Expression: MAPK1 ----> PPARG 19243475 10.1111/j.1582-4934.2009.00709.x10.1111/j.158  
 Expression: MAPK1 ----> PPARG 19243475 10.1111/j.1582-4934.2009.00709.x10.1111/j.158  
 Expression: MAPK1 ----> PPARG 20339310 10.3275/694810.1007/BF03346688  
 Expression: MAPK1 ----> PPARG 21669876 10.1074/jbc.M111.24843510.1074/jbc.M111.24843  
 Expression: MAPK1 ----> PPARG 22805337 10.1111/j.1582-4934.2012.01602.x10.1111/j.158  
 Expression: MAPK1 ----> PPARG 10.1016/j.fct.2011.11.020  
 Expression: MAPK1 ----> PPARG 10.3233/CH-170246  
 Expression: MAPK1 ----> PPARG 10.1074/jbc.RA118.004411  
 Expression: MAPK1 ----> PPARG 10.21775/cimb.031.001  
 Expression: MAPK1 ----> PPARG 10.2337/db18-1055  
 Expression: MAPK1 ----> PPARG 10.2337/db18-1055  
 Expression: MAPK1 ----> PPARG 10.2337/db18-1055  
 Expression: MAPK1 ----> PPARG 10.1071/RD19108  
 Expression: MAPK1 ----> PPARG 22675336 10.1155/2012/541204  
 Expression: MAPK1 ----> PPARG 20643830 10.1084/jem.20091022  
 Expression: MAPK1 ----> PPARG 21155050 10.3349/ymj.2011.52.1.165  
 Expression: MAPK1 ----> PPARG 21155050 10.3349/ymj.2011.52.1.165  
 Expression: MAPK1 ----> PPARG 21669876 10.1074/jbc.M111.248435  
 Expression: MAPK1 ----> PPARG 21701568 10.1038/oby.2011.176  
 Expression: MAPK1 ----> PPARG 23746272 10.2174/09298673113209990136  
 Expression: MAPK1 ----> PPARG 22479600 10.1371/journal.pone.0034315  
 Expression: MAPK1 ----> PPARG 10.1074/jbc.M113.546382  
 Expression: MAPK1 ----> PPARG 24626526 10.3892/mmr.2014.2041  
 Expression: MAPK1 ----> PPARG 24959884 10.1371/journal.pone.0100862  
 Expression: MAPK1 ----> PPARG 10.1194/jlr.M049551  
 Expression: MAPK1 ----> PPARG 10.1194/jlr.M050658  
 Expression: MAPK1 ----> PPARG 21368268 10.1152/ajpregu.00806.2010  
 Expression: MAPK1 ----> PPARG 21737780 10.1152/ajpgi.00508.2010  
 Expression: MAPK1 ----> PPARG 18635913 10.3177/jnsv.54.250  
 Expression: MAPK1 ----> PPARG 15733737 10.1016/j.biochi.2004.10.018  
 Expression: MAPK1 ----> PPARG 23780847 10.1152/physiolgenomics.00009.2013  
 Expression: MAPK1 ----> PPARG 25796354 10.12659/MSM.893144  
 Expression: MAPK1 ----> PPARG 12270934 10.1074/jbc.M207776200  
 Expression: MAPK1 ----> PPARG 15193259 10.1016/j.ccr.2004.05.014  
 Expression: MAPK1 ----> PPARG 15252128 10.1242/jcs.01207  
 Expression: MAPK1 ----> PPARG 18783396 10.1111/j.1530-0277.2008.00781.x10.1111/j.153  
 Expression: MAPK1 ----> PPARG 18783396 10.1111/j.1530-0277.2008.00781.x10.1111/j.153  
 Expression: MAPK1 ----> PPARG 21352814 10.1016/j.bbrc.2011.02.095  
 Expression: MAPK1 ----> PPARG 21352814 10.1016/j.bbrc.2011.02.095  
 Expression: MAPK1 ----> PPARG 20346961 10.1016/j.lfs.2010.03.010

Expression: MAPK1 ---> PPARG 18485432 10.1016/j.taap.2008.03.016  
 Expression: MAPK1 ---> PPARG 18790715 10.1016/j.mce.2008.08.018  
 Expression: MAPK1 ---> PPARG 18790715 10.1016/j.mce.2008.08.018  
 Expression: MAPK1 ---> PPARG 18790715 10.1016/j.mce.2008.08.018  
 Expression: MAPK1 ---> PPARG 10.1016/j.mce.2010.03.005  
 Expression: MAPK1 ---> PPARG 21839191 10.1016/j.bone.2011.07.038  
 Expression: MAPK1 ---> PPARG 23623642 10.1016/j.atherosclerosis.2013.03.023  
 Expression: MAPK1 ---> PPARG 23684777 10.1016/j.freeradbiomed.2013.05.013  
 Expression: MAPK1 ---> PPARG 23684777 10.1016/j.freeradbiomed.2013.05.013  
 Expression: MAPK1 ---> PPARG 23684777 10.1016/j.freeradbiomed.2013.05.013  
 Expression: MAPK1 ---> PPARG 24412557 10.1016/j.fct.2014.01.007  
 Expression: MAPK1 ---> PPARG 24355793 10.1016/j.jnutbio.2013.09.009  
 Expression: MAPK1 ---> PPARG 25557278 10.1016/j.freeradbiomed.2014.12.019  
 Expression: MAPK1 ---> PPARG 16766531  
 Expression: MAPK1 ---> PPARG 16766531  
 Expression: MAPK1 ---> PPARG 20553736 10.1016/j.lfs.2010.05.007  
 Expression: MAPK1 ---> PPARG 10.1016/j.fct.2011.11.020  
 Expression: MAPK1 ---> PPARG 10.1016/j.fct.2011.11.020  
 Expression: MAPK1 ---> PPARG 22137902 10.1016/j.fct.2011.11.020  
 Expression: MAPK1 ---> PPARG 22137902 10.1016/j.fct.2011.11.020  
 Expression: MAPK1 ---> PPARG 25283330 10.1016/j.jnutbio.2014.07.007  
 Expression: MAPK1 ---> PPARG 19221061  
 Expression: MAPK1 ---> PPARG 21155050 10.3349/ymj.2011.52.1.165  
 Expression: MAPK1 ---> PPARG 24735204 10.1089/dna.2013.2290  
 Expression: MAPK1 ---> PPARG 20226837 10.1016/j.mce.2010.03.005  
 Expression: MAPK1 ---> PPARG 20553736 10.1016/j.lfs.2010.05.007  
 Expression: MAPK1 ---> PPARG 21155050 10.3349/ymj.2011.52.1.165  
 Expression: MAPK1 ---> PPARG 21664967 10.1016/j.cellsig.2011.05.018  
 Expression: MAPK1 ---> PPARG 23684777 10.1016/j.freeradbiomed.2013.05.013  
 Expression: MAPK1 ---> PPARG 25937083 10.1016/j.mvr.2015.04.008  
 Expression: MAPK1 ---> PPARG  
 Expression: MAPK1 ---> PPARG 26675800  
 Expression: MAPK1 ---> PPARG 28838346 10.14715/cmb/2017.63.7.15  
 Expression: MAPK1 ---> PPARG 29099637 10.1089/dna.2017.3706  
 Expression: MAPK1 ---> PPARG 29299041 10.1186/s12986-017-0234-y  
 Expression: MAPK1 ---> PPARG 29299041 10.1186/s12986-017-0234-y  
 Expression: MAPK1 ---> PPARG 10.1091/mbc.E17-03-0141  
 Expression: MAPK1 ---> PPARG 10.1091/mbc.E17-03-0141  
 Expression: MAPK1 ---> PPARG 29990990 10.1159/000491619  
 Expression: MAPK1 ---> PPARG 29383561 10.1007/s11010-018-3299-7  
 Expression: MAPK1 ---> PPARG 29383561 10.1007/s11010-018-3299-7  
 Expression: MAPK1 ---> PPARG 30639475 10.1016/j.molimm.2019.01.00110.1016/j.molimm.  
 Expression: MAPK1 ---> PPARG 30641938 10.3390/ijms2002027410.3390/ijms20020274  
 Expression: MAPK1 ---> PPARG 33370564 10.1016/j.bbagen.2020.12983610.1016/j.bbagen.  
 Expression: MAPK1 ---> PPARG 33468065 10.1186/s12864-020-07361-9  
 Expression: MAPK1 ---> PPARG 33991355 10.1111/pim.1286810.1111/pim.12868  
 Expression: MAPK1 ---> PPARG 34948240 10.3390/ijms222413446  
 Expression: MAPK1 ---> PPARG 35109789 10.1186/s11658-022-00314-y  
 Expression: MAPK1 ---> PPARG 35859055 10.1007/s00018-022-04475-z  
 ProtModification: MAPK1 ---> PPAF 27871858 10.1016/j.bbrc.2016.11.102

ProtModification: MAPK1 ---> PPAF21525007 10.1074/jbc.M111.236398  
ProtModification: MAPK1 ---> PPAF15632188 10.1074/jbc.M409447200  
ProtModification: MAPK1 ---> PPAF26105050 10.1074/jbc.M115.638924  
ProtModification: MAPK1 ---> PPAF28424263 10.1074/jbc.M116.771428  
ProtModification: MAPK1 ---> PPAF24368768 10.1074/jbc.M113.536805  
ProtModification: MAPK1 ---> PPAF16574647 10.1074/jbc.M602623200  
ProtModification: MAPK1 ---> PPAF12837769 10.1074/jbc.M210747200  
ProtModification: MAPK1 ---> PPAF15067015 10.1074/jbc.M401766200  
ProtModification: MAPK1 ---> PPAF12475986 10.1074/jbc.M208394200  
ProtModification: MAPK1 ---> PPAF12475986 10.1074/jbc.M208394200  
ProtModification: MAPK1 ---> PPAF27475846 10.1016/j.mce.2016.07.030  
ProtModification: MAPK1 ---> PPAF27475846 10.1016/j.mce.2016.07.030  
ProtModification: MAPK1 ---> PPAF27984083 10.1016/j.mce.2016.10.028  
ProtModification: MAPK1 ---> PPAF27984083 10.1016/j.mce.2016.10.028  
ProtModification: MAPK1 ---> PPAF27352979 10.1016/j.freeradbiomed.2016.06.023  
ProtModification: MAPK1 ---> PPAF31654717 10.1016/j.cellsig.2019.109429  
ProtModification: MAPK1 ---> PPAF32088371 10.1016/j.cellsig.2020.109575  
ProtModification: MAPK1 ---> PPAF33359696 10.1016/j.bbadis.2020.166050  
ProtModification: MAPK1 ---> PPAF33359696 10.1016/j.bbadis.2020.166050  
ProtModification: MAPK1 ---> PPAF27268145 10.1016/j.phrs.2016.02.028  
ProtModification: MAPK1 ---> PPAF27268145 10.1016/j.phrs.2016.02.028  
ProtModification: MAPK1 ---> PPAF30745182 10.1016/j.cmet.2019.01.005  
ProtModification: MAPK1 ---> PPAF31708444 10.1016/j.cmet.2019.10.003  
ProtModification: MAPK1 ---> PPAF28580280 10.1016/j.molmet.2017.03.003  
ProtModification: MAPK1 ---> PPAF12110438 10.1016/S8756-3282(02)00807-4  
ProtModification: MAPK1 ---> PPAF17331472 10.1016/j.bbrc.2007.02.057  
ProtModification: MAPK1 ---> PPAF21486568 10.1016/j.febslet.2011.03.066  
ProtModification: MAPK1 ---> PPAF15993441 10.1016/j.neuropharm.2005.03.009  
ProtModification: MAPK1 ---> PPAF12729718 10.1016/S0041-008X(03)00015-2  
ProtModification: MAPK1 ---> PPARG 10.1016/S0041-008X(03)00083-8  
ProtModification: MAPK1 ---> PPAF16338464 10.1016/j.placenta.2005.01.012  
ProtModification: MAPK1 ---> PPAF21354647 10.1016/j.lungcan.2011.01.019  
ProtModification: MAPK1 ---> PPAF22137902 10.1016/j.fct.2011.11.020  
ProtModification: MAPK1 ---> PPAF15733737 10.1016/j.biochi.2004.10.018  
ProtModification: MAPK1 ---> PPAF15733734 10.1016/j.biochi.2004.11.010  
ProtModification: MAPK1 ---> PPAF21645960 10.1016/j.diff.2011.05.008  
ProtModification: MAPK1 ---> PPAF14597384 10.1016/S0378-1119(03)00816-3  
ProtModification: MAPK1 ---> PPAF18423978 10.1016/j.cellsig.2008.02.022  
ProtModification: MAPK1 ---> PPAF18571911 10.1016/j.etp.2008.04.009  
ProtModification: MAPK1 ---> PPAF15780600 10.1016/j.ceb.2005.02.002  
ProtModification: MAPK1 ---> PPAF12943712 10.1016/S0960-0760(03)00214-0  
ProtModification: MAPK1 ---> PPAF17560826 10.1016/j.bbalip.2007.04.018  
ProtModification: MAPK1 ---> PPAF17560826 10.1016/j.bbalip.2007.04.018  
ProtModification: MAPK1 ---> PPAF23058985 10.1016/j.bcp.2012.09.033  
ProtModification: MAPK1 ---> PPAF23058985 10.1016/j.bcp.2012.09.033  
ProtModification: MAPK1 ---> PPAF22901559 10.1016/j.nutres.2012.06.001  
ProtModification: MAPK1 ---> PPAF24036109 10.1016/j.ejphar.2013.08.035  
ProtModification: MAPK1 ---> PPAF24036109 10.1016/j.ejphar.2013.08.035  
ProtModification: MAPK1 ---> PPAF24845100 10.1016/j.abb.2014.05.008  
ProtModification: MAPK1 ---> PPAF24915420 10.1016/j.bcp.2014.06.002  
ProtModification: MAPK1 ---> PPAF25813581 10.1016/j.cellsig.2015.03.010  
ProtModification: MAPK1 ---> PPAF25813581 10.1016/j.cellsig.2015.03.010  
ProtModification: MAPK1 ---> PPAF26830970 10.1016/j.ceca.2015.12.006  
ProtModification: MAPK1 ---> PPAF26556104 10.1016/j.cyto.2015.11.001



ProtModification: MAPK1 ---> PPAF 9886850  
ProtModification: MAPK1 ---> PPAF 16574647  
ProtModification: MAPK1 ---> PPAF 15632188  
ProtModification: MAPK1 ---> PPAF 15067015  
ProtModification: MAPK1 ---> PPAF 12837769  
ProtModification: MAPK1 ---> PPAF 12475986  
ProtModification: MAPK1 ---> PPAF 12475986  
ProtModification: MAPK1 ---> PPAF 12356758  
ProtModification: MAPK1 ---> PPAF 12356758  
ProtModification: MAPK1 ---> PPAF 9030579  
ProtModification: MAPK1 ---> PPAF 8943212  
ProtModification: MAPK1 ---> PPAF 15677498  
ProtModification: MAPK1 ---> PPAF 15054105  
ProtModification: MAPK1 ---> PPAF 18287349  
ProtModification: MAPK1 ---> PPAF 10064336  
ProtModification: MAPK1 ---> PPAF 17210639  
ProtModification: MAPK1 ---> PPAF 34339734 10.1016/j.jbc.2021.101030  
ProtModification: MAPK1 ---> PPAF 18287349 10.1093/jn/138.3.455  
ProtModification: MAPK1 ---> PPARG 10.1016/j.fct.2011.11.020  
ProtModification: MAPK1 ---> PPARG 10.1016/j.ceca.2015.12.006  
ProtModification: MAPK1 ---> PPAF 15486348  
ProtModification: MAPK1 ---> PPAF 15486348  
ProtModification: MAPK1 ---> PPAF 15486348  
ProtModification: MAPK1 ---> PPAF 14656714  
ProtModification: MAPK1 ---> PPAF 14656714  
ProtModification: MAPK1 ---> PPAF 14656714  
ProtModification: MAPK1 ---> PPARG 10.1530/JME-15-0122  
ProtModification: MAPK1 ---> PPARG 10.1074/jbc.M116.771428  
ProtModification: MAPK1 ---> PPAF 29141245 10.1159/000485008  
ProtModification: MAPK1 ---> PPAF 29990990 10.1159/000491619  
ProtModification: MAPK1 ---> PPAF 29383561 10.1007/s11010-018-3299-7  
ProtModification: MAPK1 ---> PPAF 30287730 10.3390/ijms19103022  
ProtModification: MAPK1 ---> PPARG 10.1074/jbc.RA118.004411  
ProtModification: MAPK1 ---> PPARG 10.15252/embr.201947928  
ProtModification: MAPK1 ---> PPAF 20590410 10.1089/scd.2010.0071  
ProtModification: MAPK1 ---> PPAF 20590410 10.1089/scd.2010.0071  
ProtModification: MAPK1 ---> PPAF 21525007 10.1074/jbc.M111.236398  
ProtModification: MAPK1 ---> PPAF 22448169 10.1155/2012/929052  
ProtModification: MAPK1 ---> PPAF 22481913 10.1155/2012/641087  
ProtModification: MAPK1 ---> PPAF 20508203 10.1161/ATVBAHA.109.202309  
ProtModification: MAPK1 ---> PPAF 23549795 10.3349/ymj.2013.54.3.545  
ProtModification: MAPK1 ---> PPAF 22292086 10.1371/journal.pone.0030983  
ProtModification: MAPK1 ---> PPAF 23175826 10.1523/JNEUROSCI.2153-12.2012  
ProtModification: MAPK1 ---> PPAF 24194944 10.1371/journal.pone.0078536  
ProtModification: MAPK1 ---> PPAF 24194944 10.1371/journal.pone.0078536  
ProtModification: MAPK1 ---> PPAF 24304723 10.1254/jphs.13R09CP  
ProtModification: MAPK1 ---> PPARG 10.1074/jbc.M113.536805  
ProtModification: MAPK1 ---> PPAF 24189421 10.1248/bpb.b13-00351  
ProtModification: MAPK1 ---> PPARG 10.1530/ERC-13-0529  
ProtModification: MAPK1 ---> PPAF 25409143 10.1038/nature13887

ProtModification: MAPK1 ---> PPAF25409143 10.1038/nature13887  
 ProtModification: MAPK1 ---> PPAF25790378 10.1371/journal.pone.0120073  
 ProtModification: MAPK1 ---> PPAF26125905 10.4238/2015.June.26.5  
 ProtModification: MAPK1 ---> PPARG 10.1074/jbc.M115.638924  
 ProtModification: MAPK1 ---> PPAF25409143 10.1038/nature1388710.1038/nature13887  
 ProtModification: MAPK1 ---> PPAF17632092 10.1016/j.cbi.2007.05.010  
 ProtModification: MAPK1 ---> PPAF23490586 10.1016/j.metabol.2013.01.025  
 ProtModification: MAPK1 ---> PPAF24915420 10.1016/j.bcp.2014.06.002  
 ProtModification: MAPK1 ---> PPAF27268145 10.1016/j.phrs.2016.02.028  
 ProtModification: MAPK1 ---> PPAF16873530  
 ProtModification: MAPK1 ---> PPAF16835228  
 ProtModification: MAPK1 ---> PPAF16155293  
 ProtModification: MAPK1 ---> PPAF15067015  
 ProtModification: MAPK1 ---> PPAF18287349  
 ProtModification: MAPK1 ---> PPAF22593575 10.1074/jbc.M112.350181  
 ProtModification: MAPK1 ---> PPAF22593575 10.1074/jbc.M112.350181  
 ProtModification: MAPK1 ---> PPAF22593575 10.1074/jbc.M112.350181  
 ProtModification: MAPK1 ---> PPAF22342903 10.1016/j.biochi.2012.01.008  
 ProtModification: MAPK1 ---> PPAF22561024 10.1016/j.rbmo.2012.02.012  
 ProtModification: MAPK1 ---> PPAF20809049 10.2119/molmed.2010.00063  
 ProtModification: MAPK1 ---> PPAF21854054 10.1021/jf2014233  
 ProtModification: MAPK1 ---> PPARG  
 ProtModification: MAPK1 ---> PPAF29299041 10.1186/s12986-017-0234-y  
 ProtModification: MAPK1 ---> PPAF29299041 10.1186/s12986-017-0234-y  
 ProtModification: MAPK1 ---> PPAF946 10.1016/j.ejcb.2018.03.001  
 ProtModification: MAPK1 ---> PPAF32878272 10.3390/ijms21176300  
 ProtModification: MAPK1 ---> PPAF35040437 10.1172/JCI148552  
 ProtModification: MAPK1 ---> PPAF35254645 10.1007/s40265-022-01689-0  
 ProtModification: MAPK1 ---> PPAF35501783 10.1186/s12915-022-01287-2  
 negative Regulation: KDM5B ---| c32440821 10.1007/s12031-020-01587-8  
 negative Regulation: KDM5B ---| c25951238 10.1371/journal.pone.0125343  
 positive Expression: CD34 --> GC30909158 10.1016/j.redox.2019.101153  
 positive Regulation: TNFAIP8L2 --30114619 10.1016/j.molimm.2018.08.010  
 Regulation: PRR5L ---> AKT1 29344641 10.3892/ijo.2018.4244  
 Regulation: PRR5L ---> AKT1 25486193 10.4161/15384101.2014.941747  
 positive Expression: KDM5B --> F33304897 10.3389/fcell.2020.55373310.3389/fcell.2020.5  
 positive Expression: KDM5B --> F35946516 10.1097/CAD.0000000000001329  
 positive Expression: KDM5B --> F35946516 10.1097/CAD.0000000000001329  
 positive Expression: KDM5B --> F35946516 10.1097/CAD.0000000000001329  
 positive Expression: KDM5B --> F25909289 10.18632/oncotarget.3713  
 positive Expression: KDM5B --> F30628696 10.3892/mmr.2019.9832  
 positive Expression: KDM5B --> F28958389 10.1016/j.trecan.2017.08.004  
 positive Expression: KDM5B --> F35946516 10.1097/CAD.0000000000001329  
 positive Expression: KDM5B --> F28958389 10.1016/j.trecan.2017.08.004  
 positive Expression: NOTCH1 --> 33587255 10.1007/s12020-021-02651-y  
 negative Regulation: UCA1 ---| cf30825424 10.1016/j.clinbiochem.2019.02.013  
 negative Regulation: UCA1 ---| cf33901464 10.1016/j.ejphar.2021.174114  
 negative Regulation: UCA1 ---| cf30107990 10.1016/j.prp.2018.07.036  
 negative Regulation: UCA1 ---| cf29674277 10.1016/j.biopha.2018.03.138  
 negative Regulation: UCA1 ---| cf32146422 10.1016/j.drug.2020.100683  
 negative Regulation: UCA1 ---| cf31611036 10.1016/j.oooo.2019.08.011  
 negative Regulation: UCA1 ---| cf29441929 10.1691/ph.2016.6625  
 negative Regulation: UCA1 ---| cf29441929 10.1691/ph.2016.6625  
 negative Regulation: UCA1 ---| cf29441929 10.1691/ph.2016.6625

negative Regulation: UCA1 ---| cf 29441929 10.1691/ph.2016.6625  
negative Regulation: UCA1 ---| cf 29441929 10.1691/ph.2016.6625  
negative Regulation: UCA1 ---| cf 29441929 10.1691/ph.2016.6625  
negative Regulation: UCA1 ---| cf 29441929 10.1691/ph.2016.6625  
negative Regulation: UCA1 ---| cf 29367594 10.1038/s41419-017-0113-5  
negative Regulation: UCA1 ---| cf 30015983 10.3892/or.2018.6573  
negative Regulation: UCA1 ---| cf 30868851 10.7754/Clin.Lab.2018.180739  
negative Regulation: UCA1 ---| cf 31173289 10.26355/eurrev\_201905\_17921  
negative Regulation: UCA1 ---| cf 31528122 10.1186/s12935-019-0934-7  
negative Regulation: UCA1 ---| cf 33936199 10.1155/2021/5519720  
negative Regulation: UCA1 ---| cf 33936199 10.1155/2021/5519720  
negative Regulation: UCA1 ---| cf 27591936 10.1016/j.canlet.2016.08.01510.1016/j.canlet.  
negative Regulation: UCA1 ---| cf 29441929 10.1691/ph.2016.662510.1691/ph.2016.6625  
negative Regulation: UCA1 ---| cf 29441929 10.1691/ph.2016.662510.1691/ph.2016.6625  
negative Regulation: UCA1 ---| cf 29441929 10.1691/ph.2016.662510.1691/ph.2016.6625  
negative Regulation: PAX8 ---| NC 31391063 10.1186/s13046-019-1332-7  
Regulation: LRP8 ---> AKT1 12376533 10.1074/jbc.M209205200  
Regulation: LRP8 ---> AKT1 12376533 10.1074/jbc.M209205200  
Regulation: LRP8 ---> AKT1 12376533 10.1074/jbc.M209205200  
Regulation: LRP8 ---> AKT1 30227220 10.1016/j.canlet.2018.09.022  
Regulation: LRP8 ---> AKT1 12376533  
Regulation: LRP8 ---> AKT1 28129662 10.1055/s-0036-1597286  
Regulation: LRP8 ---> AKT1 30451721 10.1097/MOH.0000000000000473  
Regulation: LRP8 ---> AKT1 26474194 10.1002/art.3945310.1002/art.39453  
Regulation: LRP8 ---> AKT1 28386352  
Regulation: LRP8 ---> AKT1 10.1097/MOH.0000000000000473  
Regulation: LRP8 ---> AKT1  
Regulation: LRP8 ---> AKT1 33626909 10.1161/ATVBAHA.121.316000  
Regulation: LRP8 ---> AKT1 36446154 10.1016/j.bbrc.2022.10.101  
Expression: AKT1 ---> CD34 27645691 10.1016/j.exphem.2016.09.003  
Expression: AKT1 ---> CD34 26073521 10.1016/j.exphem.2015.06.001  
Expression: AKT1 ---> CD34 34928395 10.1007/s00421-021-04865-4  
positive Regulation: CD34 --> P11158605  
ProtModification: PTEN ---> AKT1 32201226 10.1016/j.jaut.2020.102440  
ProtModification: PTEN ---> AKT1 19264909 10.2353/ajpath.2009.080460  
ProtModification: PTEN ---> AKT1 20515660 10.1016/j.bbrc.2010.05.140  
ProtModification: PTEN ---> AKT1 22074824 10.1016/j.bbrc.2011.10.120  
ProtModification: PTEN ---> AKT1 22074824 10.1016/j.bbrc.2011.10.120  
ProtModification: PTEN ---> AKT1 20223231 10.1016/j.cca.2010.02.074  
ProtModification: PTEN ---> AKT1 16919259 10.1016/j.ydbio.2006.06.001  
ProtModification: PTEN ---> AKT1 15652487 10.1016/j.cell.2004.12.033  
ProtModification: PTEN ---> AKT1 22244698 10.1016/j.biomaterials.2011.12.051  
ProtModification: PTEN ---> AKT1 20347952 10.1016/j.exger.2010.03.015  
ProtModification: PTEN ---> AKT1 20678571 10.1016/j.freeradbiomed.2010.07.020  
ProtModification: PTEN ---> AKT1 18495460 10.1016/j.jnutbio.2007.12.001  
ProtModification: PTEN ---> AKT1 12946479 10.1016/S0960-7404(03)00037-9  
ProtModification: PTEN ---> AKT1 15172356 10.1016/S1470-2045(04)01492-5  
ProtModification: PTEN ---> AKT1 10.1016/S1535-6108(02)00024-7  
ProtModification: PTEN ---> AKT1 10.1016/S1535-6108(03)00331-3  
ProtModification: PTEN ---> AKT1 20801415 10.1016/j.trsl.2010.06.003  
ProtModification: PTEN ---> AKT1 23403165 10.1016/j.bbcan.2013.01.004

ProtModification: PTEN ---> AKT1 23458710 10.1016/j.neuroscience.2013.02.046  
ProtModification: PTEN ---> AKT1 24041630 10.1016/j.critrevonc.2013.08.003  
ProtModification: PTEN ---> AKT1 24561200 10.1016/j.febslet.2014.02.005  
ProtModification: PTEN ---> AKT1 24911372 10.1016/j.ajpath.2014.05.004  
ProtModification: PTEN ---> AKT1 25533812 10.1016/j.phrs.2014.12.004  
ProtModification: PTEN ---> AKT1 25721811 10.1016/j.semcd.2015.02.012  
ProtModification: PTEN ---> AKT1 27207584 10.1016/j.yexcr.2016.05.011  
ProtModification: PTEN ---> AKT1 27017291 10.1016/j.ejca.2016.02.016  
ProtModification: PTEN ---> AKT1 27297622 10.1016/j.biocel.2016.06.006  
ProtModification: PTEN ---> AKT1 20630061  
ProtModification: PTEN ---> AKT1 18258752  
ProtModification: PTEN ---> AKT1 18258752  
ProtModification: PTEN ---> AKT1 17142836  
ProtModification: PTEN ---> AKT1 10400703  
ProtModification: PTEN ---> AKT1 18268330  
ProtModification: PTEN ---> AKT1 15539459  
ProtModification: PTEN ---> AKT1 15087424  
ProtModification: PTEN ---> AKT1 10988233  
ProtModification: PTEN ---> AKT1 17657248  
ProtModification: PTEN ---> AKT1 10435616  
ProtModification: PTEN ---> AKT1 10435616  
ProtModification: PTEN ---> AKT1 11997518  
ProtModification: PTEN ---> AKT1 21253589  
ProtModification: PTEN ---> AKT1 21170325  
ProtModification: PTEN ---> AKT1 20436671  
ProtModification: PTEN ---> AKT1 26563373 10.1007/s13277-015-4392-0  
ProtModification: PTEN ---> AKT1 27793908 10.21873/anticanres.11170  
ProtModification: PTEN ---> AKT1 28289208 10.1073/pnas.1612284114  
ProtModification: PTEN ---> AKT1 28229220 10.1007/s00432-016-2333-y  
ProtModification: PTEN ---> AKT1 28384045 10.1089/gtmb.2016.0281  
ProtModification: PTEN ---> AKT1 28358430 10.3892/mmr.2017.6415  
ProtModification: PTEN ---> AKT1 28358430 10.3892/mmr.2017.6415  
ProtModification: PTEN ---> AKT1 28498467 10.3892/ijo.2017.3982  
ProtModification: PTEN ---> AKT1 28886696 10.1186/s12885-017-3639-0  
ProtModification: PTEN ---> AKT1 29038421 10.1038/s41467-017-00906-9  
ProtModification: PTEN ---> AKT1 29121869 10.1186/s12885-017-3714-6  
ProtModification: PTEN ---> AKT1 28982275 10.1177/1933719117734700  
ProtModification: PTEN ---> AKT1 29463952 10.1155/2017/5458178  
ProtModification: PTEN ---> AKT1 29488607 10.3892/mmr.2018.8640  
ProtModification: PTEN ---> AKT1 30134935 10.1186/s13046-018-0869-1  
ProtModification: PTEN ---> AKT1 31138169 10.1186/s12885-019-5731-0  
ProtModification: PTEN ---> AKT1 31006103 10.1007/s10549-019-05239-3  
ProtModification: PTEN ---> AKT1 10.1038/s41374-018-0185-6  
ProtModification: PTEN ---> AKT1 30318001 10.2174/1871520618666181012093056  
ProtModification: PTEN ---> AKT1 10.1155/2019/2902985  
ProtModification: PTEN ---> AKT1 32230887 10.3390/i\_jms21072322  
ProtModification: PTEN ---> AKT1 32493394 10.1186/s12964-020-00586-x  
ProtModification: PTEN ---> AKT1 22393246 10.1124/jpet.112.191536  
ProtModification: PTEN ---> AKT1 23023710 10.1172/JCI61269  
ProtModification: PTEN ---> AKT1 22465967 10.1007/s00262-012-1249-x  
ProtModification: PTEN ---> AKT1 23239155 10.1164/rccm.201205-08510C  
ProtModification: PTEN ---> AKT1 20795550 10.1007/978-1-4419-6451-9\_15  
ProtModification: PTEN ---> AKT1 21953448 10.1074/jbc.M111.270884  
ProtModification: PTEN ---> AKT1 22233681 10.1017/S1462399411002109

ProtModification: PTEN ---> AKT1 20630061 10.1186/1471-2407-10-368  
ProtModification: PTEN ---> AKT1 22035408 10.1186/1475-2867-11-36  
ProtModification: PTEN ---> AKT1 22107784 10.1186/1479-5876-9-200  
ProtModification: PTEN ---> AKT1 21263312 10.1097/CAD.0b013e328341ccdd  
ProtModification: PTEN ---> AKT1 21556061 10.1038/ncomms1309  
ProtModification: PTEN ---> AKT1 23970032 10.3892/ijo.2013.2064  
ProtModification: PTEN ---> AKT1 20436671 10.1371/journal.pone.0010350  
ProtModification: PTEN ---> AKT1 21170325 10.1371/journal.pone.0015170  
ProtModification: PTEN ---> AKT1 21253589 10.1371/journal.pone.0015909  
ProtModification: PTEN ---> AKT1 21494560 10.1371/journal.pone.0018702  
ProtModification: PTEN ---> AKT1 22194952 10.1371/journal.pone.0028930  
ProtModification: PTEN ---> AKT1 24113181 10.1038/cddis.2013.375  
ProtModification: PTEN ---> AKT1 24040957 10.1089/ars.2013.5619  
ProtModification: PTEN ---> AKT1 24786832 10.1038/cdd.2014.53  
ProtModification: PTEN ---> AKT1 25677517 10.1161/CIRCRESAHA.116.305348  
ProtModification: PTEN ---> AKT1 21421815 10.1152/ajpheart.01138.2010  
ProtModification: PTEN ---> AKT1 23812635 10.1152/ajplung.00432.2012  
ProtModification: PTEN ---> AKT1 24651020 10.1515/revneuro-2014-0002  
ProtModification: PTEN ---> AKT1 25778370 10.1186/s13058-015-0534-y  
ProtModification: PTEN ---> AKT1 25982630 10.1038/aps.2015.24  
ProtModification: PTEN ---> AKT1 259 10.1016/j.ceca.2017.01.003  
ProtModification: PTEN ---> AKT1 23953228 10.1016/j.humpath.2013.05.014  
ProtModification: PTEN ---> AKT1 17478730  
ProtModification: PTEN ---> AKT1 11103942  
ProtModification: PTEN ---> AKT1 27634014 10.1152/ajpgi.00292.2016  
ProtModification: PTEN ---> AKT1 28358430 10.3892/mmr.2017.6415  
ProtModification: PTEN ---> AKT1 28524854 10.1038/cdd.2017.73  
ProtModification: PTEN ---> AKT1 28957811 10.1159/000481648  
ProtModification: PTEN ---> AKT1 28982275 10.1177/1933719117734700  
ProtModification: PTEN ---> AKT1 20596601 10.3892/ijmm-00000455  
ProtModification: PTEN ---> AKT1 21267808 10.1055/s-0030-1250735  
ProtModification: PTEN ---> AKT1 22364283 10.1042/BJ20112037  
ProtModification: PTEN ---> AKT1 24736893 10.3892/mmr.2014.2155  
ProtModification: PTEN ---> AKT1 25234167 10.1038/leu.2014.278  
ProtModification: PTEN ---> AKT1 25825815 10.1210/en.2014-1362  
ProtModification: PTEN ---> AKT1 27829222 10.18632/oncotarget.1311310.18632/oncotarget.  
ProtModification: PTEN ---> AKT1 27829222 10.18632/oncotarget.1311310.18632/oncotarget.  
ProtModification: PTEN ---> AKT1 21874010 10.1038/modpathol.2011.133  
ProtModification: PTEN ---> AKT1 21874010 10.1038/modpathol.2011.133  
ProtModification: PTEN ---> AKT1 25333206 10.3892/mmr.2014.2700  
ProtModification: PTEN ---> AKT1 10.1074/jbc.M115.684746  
ProtModification: PTEN ---> AKT1  
ProtModification: PTEN ---> AKT1 26692175 10.1038/ni.3311  
ProtModification: PTEN ---> AKT1 27035337 10.3892/mmr.2016.5048  
ProtModification: PTEN ---> AKT1 26589417 10.1007/s13277-015-4456-1  
ProtModification: PTEN ---> AKT1 20515660 10.1016/j.bbrc.2010.05.140  
ProtModification: PTEN ---> AKT1 28259931 10.3892/mmr.2017.6204  
ProtModification: PTEN ---> AKT1 10.1200/JCO.18.01207  
ProtModification: PTEN ---> AKT1 31006103 10.1007/s10549-019-05239-310.1007/s10549-019-  
ProtModification: PTEN ---> AKT1 33189865 10.1016/j.mce.2020.111080  
ProtModification: PTEN ---> AKT1 33189865 10.1016/j.mce.2020.111080

ProtModification: PTEN ---> AKT1 33554779 10.1152/AJPENDO.00275.2020  
 ProtModification: PTEN ---> AKT1 33554779 10.1152/AJPENDO.00275.2020  
 ProtModification: PTEN ---> AKT1 33895342 10.1016/j.neuroscience.2021.04.01010.1016/j.n  
 ProtModification: PTEN ---> AKT1 34248141 10.1038/s41392-021-00571-x10.1038/s41392-021-  
 ProtModification: PTEN ---> AKT1 12010818 10.1182/blood.V99.11.4138  
 ProtModification: PTEN ---> AKT1 17142836 10.1074/jbc.M604195200  
 ProtModification: PTEN ---> AKT1 26324707 10.1074/jbc.M115.684746  
 ProtModification: PTEN ---> AKT1 21953448 10.1074/jbc.M111.270884  
 ProtModification: PTEN ---> AKT1 31884408 10.1016/j.ejmech.2019.111972  
 ProtModification: PTEN ---> AKT1 29136769 10.1016/j.biopha.2017.11.014  
 ProtModification: PTEN ---> AKT1 15851405 10.1093/annonc/mdi182  
 ProtModification: PTEN ---> AKT1 31492635 10.1016/j.molcel.2019.08.006  
 ProtModification: PTEN ---> AKT1 33098764 10.1016/j.molcel.2020.10.003  
 ProtModification: PTEN ---> AKT1 29729889 10.1016/j.biocel.2018.04.020  
 ProtModification: PTEN ---> AKT1 28578144 10.1016/j.etap.2017.05.013  
 ProtModification: PTEN ---> AKT1 32058031 10.1016/j.bbalip.2020.158658  
 ProtModification: PTEN ---> AKT1 30598407 10.1016/j.oooo.2018.11.011  
 ProtModification: PTEN ---> AKT1 25482988 10.1016/j.jbior.2014.10.004  
 ProtModification: PTEN ---> AKT1 30683902 10.1038/s41374-018-0185-6  
 ProtModification: PTEN ---> AKT1 31929796 10.1155/2019/2902985  
 ProtModification: PTEN ---> AKT1 34635142 10.1186/s13046-021-02097-0  
 negative Expression: PTEN ---| CI23470565 10.1038/cgt.2013.14  
 negative Expression: PTEN ---| CI23470565 10.1038/cgt.2013.1410.1038/cgt.2013.14  
 Regulation: SPP1 ---> PTEN 28928218 10.1074/jbc.M117.797787  
 Regulation: SPP1 ---> PTEN 28928218 10.1074/jbc.M117.797787  
 Regulation: SPP1 ---> PTEN 19286136 10.1016/j.chom.2009.01.005  
 Regulation: SPP1 ---> PTEN 19683677 10.1016/j.chom.2009.07.008  
 Regulation: SPP1 ---> PTEN 24039584 10.1371/journal.ppat.1003623  
 Expression: RBP1 ---> PPARG 26936961 10.2337/db15-1315  
 Expression: RBP1 ---> PPARG 20498279 10.1128/MCB.00014-1010.1128/MCB.00014-10  
 negative Expression: GPER1 ---| F23142288 10.1016/j.canlet.2012.10.037  
 negative Expression: GPER1 ---| F30093934  
 negative Expression: GPER1 ---| F34860303 10.1007/s10522-021-09945-8  
 positive Expression: NOTCH1 --> 18237408  
 positive Expression: NOTCH1 --> 29158034 10.1016/j.yjmcc.2017.11.00910.1016/j.yjmcc.20  
 positive Regulation: SPP1 --> R#18174176 10.1074/jbc.M706712200  
 positive Regulation: SPP1 --> R#27576187 10.1016/j.mce.2016.08.042  
 positive Regulation: SPP1 --> R#27593345 10.1016/j.ccell.2016.08.002  
 positive Regulation: SPP1 --> R#18174176  
 positive Regulation: SPP1 --> R#18174176  
 positive Regulation: SPP1 --> R#27006454 10.1161/STROKEAHA.115.011552  
 positive Regulation: SPP1 --> R#1117 10.1016/j.ccell.2016.08.002  
 positive Regulation: SPP1 --> RAC1 10.1161/STROKEAHA.115.011552  
 positive Regulation: SPP1 --> R#18174176  
 positive Regulation: SPP1 --> R#18174176 10.1074/jbc.M706712200  
 positive Regulation: SFRP1 --> c24643460 10.2119/molmed.2013.00149  
 positive Regulation: SFRP1 --> c24643460 10.2119/molmed.2013.00149  
 positive Regulation: SFRP1 --> c24643460 10.2119/molmed.2013.00149  
 Regulation: NOTCH1 ---> hypophary31778670 10.1016/j.yexcr.2019.111746  
 positive QuantitativeChange: hypc26704053 10.1016/j.yexmp.2015.12.008  
 positive QuantitativeChange: hypc30425527 10.2147/OTT.S17542310.2147/OTT.S175423  
 positive Expression: PPARG --> (28237650 10.1016/j.bcp.2017.02.017  
 positive Expression: PPARG --> (25389363 10.1152/ajpendo.00118.2014  
 positive Expression: PPARG --> (25389363 10.1152/ajpendo.00118.2014

positive Expression: PPARG --> (19944311 10.1016/j.jjcc.2009.06.00410.1016/j.jjcc.2009  
 positive Expression: PPARG --> (25618409 10.1093/cvr/cvv01810.1093/cvr/cvv018  
 positive Expression: PPARG --> (22223859 10.1194/jlr.M017319  
 positive Expression: PPARG --> (22223859 10.1194/jlr.M017319  
 positive Expression: PPARG --> (22223859 10.1194/jlr.M017319  
 positive Expression: PPARG --> (23446230 10.1194/jlr.M036533  
 positive Expression: PPARG --> CYP2J2  
 positive Regulation: ING4 --> cf29494959 10.1016/j.biopha.2018.02.066  
 positive Regulation: ING4 --> cf15882981 10.1016/j.bbrc.2005.04.023  
 positive Regulation: ING4 --> cf27484725 10.3892/mmr.2016.5552  
 positive Regulation: ING4 --> cf27484725 10.3892/mmr.2016.5552  
 positive Regulation: ING4 --> cf20707719 10.1089/cbr.2010.0778  
 positive Regulation: ING4 --> cf22863759 10.1038/cgt.2012.50  
 positive Regulation: ING4 --> cf21052098 10.1038/cgt.2010.67  
 positive Regulation: ING4 --> cf23969950 10.3892/or.2013.2671  
 positive Regulation: ING4 --> cf23969950 10.3892/or.2013.2671  
 positive Regulation: ING4 --> cf23991130 10.1371/journal.pone.0072615  
 positive Regulation: ING4 --> cf21553494  
 negative Regulation: NDUFA4L2 ---28344054 10.1016/j.yexcr.2017.03.052  
 Regulation: TP53 ---> PAX8 9722166 10.1016/S0303-7207(98)00027-6  
 Regulation: TP53 ---> PAX8 12050209  
 Regulation: TP53 ---> PAX8 23868062 10.1038/cddis.2013.262  
 Regulation: TP53 ---> PAX8  
 positive QuantitativeChange: hypc26436506 10.4238/2015.October.2.15  
 MolTransport: RAC1 ---> IGFBP4 26305333 10.1371/journal.pgen.1005458  
 MolTransport: RAC1 ---> IGFBP4 26305333 10.1371/journal.pgen.1005458  
 MolTransport: RAC1 ---> IGFBP4 26305333 10.1371/journal.pgen.1005458  
 Expression: CYP2J2 ---> PPARG 22223859 10.1194/jlr.M017319  
 Expression: CYP2J2 ---> PPARG 23313758 10.1016/j.ejphar.2012.12.025  
 Expression: CYP2J2 ---> PPARG 22223859 10.1194/jlr.M017319  
 Expression: CYP2J2 ---> PPARG 23515292 10.1210/en.2012-2012  
 Expression: CYP2J2 ---> PPARG 23515292 10.1210/en.2012-2012  
 Expression: CYP2J2 ---> PPARG 23446230 10.1194/jlr.M036533  
 Expression: CYP2J2 ---> PPARG 23696562 10.1210/en.2012-2166  
 Expression: CYP2J2 ---> PPARG 23696562 10.1210/en.2012-2166  
 Expression: CYP2J2 ---> PPARG 23696562 10.1210/en.2012-2166  
 Expression: CYP2J2 ---> PPARG 25389363 10.1152/ajpendo.00118.2014  
 Expression: CYP2J2 ---> PPARG 22223859 10.1194/jlr.M01731910.1194/jlr.M017319  
 Expression: CYP2J2 ---> PPARG 34774051 10.1186/s12931-021-01891-w  
 positive Expression: AKT1 --> CI29679564 10.1016/j.bbrc.2018.04.120  
 positive Expression: AKT1 --> CI32422139 10.1016/j.bcp.2020.114038  
 positive Expression: AKT1 --> CI32603752 10.1016/j.jid.2020.05.113  
 positive Expression: AKT1 --> CI30927618 10.1016/j.jss.2019.02.038  
 positive Expression: AKT1 --> CI32070710 10.1016/j.lfs.2020.117437  
 positive Expression: AKT1 --> CI32593711 10.1016/j.lfs.2020.118005  
 positive Expression: AKT1 --> CI32593711 10.1016/j.lfs.2020.118005  
 positive Expression: AKT1 --> CI33513401 10.1016/j.lfs.2021.119110  
 positive Expression: AKT1 --> CI33798547 10.1016/j.lfs.2021.119353  
 positive Expression: AKT1 --> CI32120136 10.1016/j.mrfmmm.2020.111690  
 positive Expression: AKT1 --> CI33159965 10.1016/j.humpath.2020.10.014  
 positive Expression: AKT1 --> CI33159965 10.1016/j.humpath.2020.10.014

positive Expression: AKT1 --> CI 32183989 10.1016/j.acthis.2020.151538  
positive Expression: AKT1 --> CI 32183989 10.1016/j.acthis.2020.151538  
positive Expression: AKT1 --> CI 32183989 10.1016/j.acthis.2020.151538  
positive Expression: AKT1 --> CI 28720430 10.1016/j.pharmthera.2017.07.004  
positive Expression: AKT1 --> CI 30825473 10.1016/j.pharmthera.2019.02.006  
positive Expression: AKT1 --> CI 32473961 10.1016/j.pharmthera.2020.107585  
positive Expression: AKT1 --> CI 33421449 10.1016/j.pharmthera.2021.107800  
positive Expression: AKT1 --> CI 28223102 10.1016/j.imlet.2017.02.006  
positive Expression: AKT1 --> CI 33647320 10.1016/j.bbamcr.2021.118992  
positive Expression: AKT1 --> CI 30249348 10.1016/j.radonc.2018.08.023  
positive Expression: AKT1 --> CI 28213003 10.1016/j.lungcan.2016.12.006  
positive Expression: AKT1 --> CI 29413045 10.1016/j.lungcan.2017.12.003  
positive Expression: AKT1 --> CI 29800685 10.1016/j.canlet.2018.05.015  
positive Expression: AKT1 --> CI 31830559 10.1016/j.canlet.2019.12.009  
positive Expression: AKT1 --> CI 29598887 10.1016/j.prp.2018.03.001  
positive Expression: AKT1 --> CI 32057515 10.1016/j.prp.2020.152852  
positive Expression: AKT1 --> CI 29031195 10.1016/j.biopha.2017.09.129  
positive Expression: AKT1 --> CD274 10.1093/annonc/mdv528.08  
positive Expression: AKT1 --> CI 26681673 10.1093/annonc/mdv615  
positive Expression: AKT1 --> CI 32136408 10.1093/annonc/mdy268.004  
positive Expression: AKT1 --> CI 30462163 10.1093/annonc/mdy507  
positive Expression: AKT1 --> CD274 10.1016/j.ejca.2018.07.165  
positive Expression: AKT1 --> CI 32294525 10.1016/j.phrs.2020.104806  
positive Expression: AKT1 --> CI 32294525 10.1016/j.phrs.2020.104806  
positive Expression: AKT1 --> CI 32294525 10.1016/j.phrs.2020.104806  
positive Expression: AKT1 --> CI 32687951 10.1016/j.phrs.2020.105086  
positive Expression: AKT1 --> CI 28476657 10.1016/j.semcancer.2017.04.018  
positive Expression: AKT1 --> CI 30951826 10.1016/j.semcancer.2019.04.001  
positive Expression: AKT1 --> CI 31422157 10.1016/j.semcancer.2019.08.015  
positive Expression: AKT1 --> CI 31874279 10.1016/j.semcancer.2019.11.011  
positive Expression: AKT1 --> CI 33301862 10.1016/j.semcancer.2020.12.001  
positive Expression: AKT1 --> CI 33301862 10.1016/j.semcancer.2020.12.001  
positive Expression: AKT1 --> CI 27192563 10.1016/j.immuni.2016.05.002  
positive Expression: AKT1 --> CI 29562194 10.1016/j.immuni.2018.03.014  
positive Expression: AKT1 --> CI 33308976 10.1016/j.urolonc.2020.11.029  
positive Expression: AKT1 --> CI 33909988 10.1016/j.molcel.2021.03.037  
positive Expression: AKT1 --> CI 33909988 10.1016/j.molcel.2021.03.037  
positive Expression: AKT1 --> CI 33909988 10.1016/j.molcel.2021.03.037  
positive Expression: AKT1 --> CI 31005030 10.1016/j.drug.2019.04.001  
positive Expression: AKT1 --> CI 33707115 10.1016/j.pan.2021.01.023  
positive Expression: AKT1 --> CI 27924752 10.1016/S1470-2045(16)30406-5  
positive Expression: AKT1 --> CI 29153898 10.1016/j.cllc.2017.10.014  
positive Expression: AKT1 --> CI 28478231 10.1016/j.jtho.2017.04.014  
positive Expression: AKT1 --> CI 28846888 10.1016/j.intimp.2017.08.017  
positive Expression: AKT1 --> CI 32866782 10.1016/j.intimp.2020.106864  
positive Expression: AKT1 --> CI 33838550 10.1016/j.dnarep.2021.103112  
positive Expression: AKT1 --> CI 31660091 10.1016/j.jdsr.2019.09.001  
positive Expression: AKT1 --> CI 29177095 10.1136/esmooopen-2017-000255



positive Expression: AKT1 --> CI 33171331 10.1016/j.redox.2020.101780  
positive Expression: AKT1 --> CI 33667716 10.1016/j.jcmgh.2021.02.010  
positive Expression: AKT1 --> CI 19010538 10.1016/j.placenta.2008.10.001  
positive Expression: AKT1 --> CI 17920123 10.1016/j.molimm.2007.08.013  
positive Expression: AKT1 --> CI 19944971 10.1016/j.nec.2009.09.002  
positive Expression: AKT1 --> CI 25499621 10.1016/j.cellsig.2014.12.003  
positive Expression: AKT1 --> CD274 10.1016/j.omtn.2021.05.011  
positive Expression: AKT1 --> CD274 10.7150/ijbs.62280  
positive Expression: AKT1 --> CI 34445735 10.3390/ijms22169030  
positive Expression: AKT1 --> CI 33860125 10.1002/hep4.165910.1002/hep4.1659  
positive Expression: AKT1 --> CI 34486197 10.1002/cbin.1169710.1002/cbin.11697  
positive Expression: AKT1 --> CI 34486197 10.1002/cbin.1169710.1002/cbin.11697  
positive Expression: AKT1 --> CI 33994852 10.7150/ijbs.5796410.7150/ijbs.57964  
positive Expression: AKT1 --> CI 19010538 10.1016/j.placenta.2008.10.00110.1016/j.place  
positive Expression: AKT1 --> CI 1109 10.1016/j.cllc.2017.10.014  
positive Expression: AKT1 --> CI 597 10.1016/j.prp.2018.03.001  
positive Expression: AKT1 --> CI 558 10.1016/j.radonc.2018.08.023  
positive Expression: AKT1 --> CD274 10.1016/j.semcancer.2019.04.001  
positive Expression: AKT1 --> CD274 10.1016/j.semcancer.2019.08.015  
positive Expression: AKT1 --> CD274 10.1016/j.semcancer.2019.11.011  
positive Expression: AKT1 --> CD274 10.1016/j.prp.2020.152852  
positive Expression: AKT1 --> CD274 10.1016/j.acthis.2020.151538  
positive Expression: AKT1 --> CD274 10.1016/j.acthis.2020.151538  
positive Expression: AKT1 --> CD274 10.1016/j.acthis.2020.151538  
positive Expression: AKT1 --> CI 25499621 10.1016/j.cellsig.2014.12.003  
positive Expression: AKT1 --> CI 26707383 10.1016/j.cllc.2015.11.006  
positive Expression: AKT1 --> CI 20626886  
positive Expression: AKT1 --> CI 16199861  
positive Expression: AKT1 --> CI 27572267 10.1038/ncomms12632  
positive Expression: AKT1 --> CI 26833481 10.1007/s12032-016-0733-0  
positive Expression: AKT1 --> CI 27617403 10.1038/labinvest.2016.96  
positive Expression: AKT1 --> CI 27793883 10.21873/anticancer.11145  
positive Expression: AKT1 --> CI 28231855 10.1186/s12967-017-1150-7  
positive Expression: AKT1 --> CI 27934877 10.1038/modpathol.2016.202  
positive Expression: AKT1 --> CI 28341875 10.1007/s00262-017-1986-y  
positive Expression: AKT1 --> CI 28341875 10.1007/s00262-017-1986-y  
positive Expression: AKT1 --> CI 28627635 10.3892/or.2017.5733  
positive Expression: AKT1 --> CI 28627635 10.3892/or.2017.5733  
positive Expression: AKT1 --> CI 28344319 10.1038/leu.2017.103  
positive Expression: AKT1 --> CI 28605599 10.1177/0022034517712435  
positive Expression: AKT1 --> CI 28714960 10.1038/onc.2017.217  
positive Expression: AKT1 --> CI 28436428 10.1038/ncomms14709  
positive Expression: AKT1 --> CI 28436428 10.1038/ncomms14709  
positive Expression: AKT1 --> CI 28910818 10.1159/000479231  
positive Expression: AKT1 --> CI 28969535 10.2174/1568009617666170927114440  
positive Expression: AKT1 --> CI 29765155 10.1038/s41388-018-0303-3  
positive Expression: AKT1 --> CI 29786078 10.1038/s41388-018-0314-0  
positive Expression: AKT1 --> CI 30120503 10.1007/s00262-018-2226-9  
positive Expression: AKT1 --> CI 30120503 10.1007/s00262-018-2226-9  
positive Expression: AKT1 --> CI 29855617 10.1038/s41388-018-0347-4  
positive Expression: AKT1 --> CD274 10.1172/JCI96610

positive Expression: AKT1 --> CI 30264678 10. 2174/1389203719666180928105632  
positive Expression: AKT1 --> CD274 10. 1172/JCI12127  
positive Expression: AKT1 --> CD274 10. 1186/s12943-019-0953-y  
positive Expression: AKT1 --> CI 30765874 10. 1038/s41416-019-0397-6  
positive Expression: AKT1 --> CD274 10. 1186/s12935-019-0789-y  
positive Expression: AKT1 --> CI 29954840 10. 1136/gut.jnl-2018-316039  
positive Expression: AKT1 --> CI 29954840 10. 1136/gut.jnl-2018-316039  
positive Expression: AKT1 --> CI 30770752 10. 1186/s12885-019-5364-3  
positive Expression: AKT1 --> CI 30770752 10. 1186/s12885-019-5364-3  
positive Expression: AKT1 --> CI 30770752 10. 1186/s12885-019-5364-3  
positive Expression: AKT1 --> CI 31113825 10. 1136/jclinpath-2019-205818  
positive Expression: AKT1 --> CD274 10. 1007/s12272-019-01169-2  
positive Expression: AKT1 --> CD274 10. 1038/s41388-019-0877-4  
positive Expression: AKT1 --> CD274 10. 1042/BSR20190362  
positive Expression: AKT1 --> CI 29187498 10. 21873/anticanres. 12180  
positive Expression: AKT1 --> CI 30368626 10. 1007/s10637-018-0678-6  
positive Expression: AKT1 --> CI 32194893  
positive Expression: AKT1 --> CD274 10. 1038/s41388-019-1001-5  
positive Expression: AKT1 --> CD274 10. 1038/s41416-019-0697-x  
positive Expression: AKT1 --> CI 32359357 10. 1186/s12943-020-01200-x  
positive Expression: AKT1 --> CI 32359357 10. 1186/s12943-020-01200-x  
positive Expression: AKT1 --> CI 21374075 10. 1007/s12185-011-0799-6  
positive Expression: AKT1 --> CI 23785454 10. 1371/journal.pone. 0065821  
positive Expression: AKT1 --> CI 24551119 10. 1371/journal.pone. 0088557  
positive Expression: AKT1 --> CI 26019170 10. 1158/1078-0432. CCR-15-001610. 1158/1078-043  
positive Expression: AKT1 --> CI 26245467 10. 1186/s12943-015-0421-210. 1186/s12943-015-0  
positive Expression: AKT1 --> CI 26637667 10. 1158/0008-5472. CAN-14-336210. 1158/0008-547  
positive Expression: AKT1 --> CI 26637667 10. 1158/0008-5472. CAN-14-336210. 1158/0008-547  
positive Expression: AKT1 --> CI 28223102 10. 1016/j. imlet. 2017. 02. 00610. 1016/j. imlet. 20  
positive Expression: AKT1 --> CI 28341875 10. 1007/s00262-017-1986-y10. 1007/s00262-017-1  
positive Expression: AKT1 --> CI 28627635 10. 3892/or. 2017. 573310. 3892/or. 2017. 5733  
positive Expression: AKT1 --> CI 30266108 10. 24920/2180410. 24920/21804  
positive Expression: AKT1 --> CI 31436252 10. 4103/jcrt. JCRT\_636\_1810. 4103/jcrt. JCRT\_636  
positive Expression: AKT1 --> CI 32294525 10. 1016/j. phrs. 2020. 10480610. 1016/j. phrs. 2020  
positive Expression: AKT1 --> CI 32294525 10. 1016/j. phrs. 2020. 10480610. 1016/j. phrs. 2020  
positive Expression: AKT1 --> CD274 10. 12659/MSM. 923624  
positive Expression: AKT1 --> CI 32963532 10. 1155/2020/7314195  
positive Expression: AKT1 --> CI 32860047 10. 1084/JEM. 20191115  
positive Expression: AKT1 --> CI 32860047 10. 1084/JEM. 20191115  
positive Expression: AKT1 --> CI 32860047 10. 1084/JEM. 20191115  
positive Expression: AKT1 --> CI 32860047 10. 1084/JEM. 20191115  
positive Expression: AKT1 --> CI 32860047 10. 1084/JEM. 20191115  
positive Expression: AKT1 --> CI 32860047 10. 1084/JEM. 20191115  
positive Expression: AKT1 --> CI 32860047 10. 1084/jem. 2019111510. 1084/jem. 20191115  
positive Expression: AKT1 --> CI 33042623  
positive Expression: AKT1 --> CI 27006653 10. 1155/2016/6261721  
positive Expression: AKT1 --> CI 27617403 10. 1038/labinvest. 2016. 96  
positive Expression: AKT1 --> CI 28436428 10. 1038/ncomms14709  
positive Expression: AKT1 --> CI 26149216 10. 1016/j. febslet. 2015. 06. 037  
positive Expression: AKT1 --> CI 1975 10. 1016/j. cllc. 2015. 11. 006  
positive Expression: AKT1 --> CI 28231855 10. 1186/s12967-017-1150-7  
positive Expression: AKT1 --> CD274  
positive Expression: AKT1 --> CI 28629173 10. 3390/ijms18061297  
positive Expression: AKT1 --> CI 30770752 10. 1186/s12885-019-5364-3

positive Expression: AKT1 --> CD274 10.1016/j.semcancer.2019.06.021  
positive Expression: AKT1 --> CD274 10.1016/j.semcancer.2019.11.011  
positive Expression: AKT1 --> CI 32992449 10.3390/i.jms21197117  
positive Expression: AKT1 --> CI 32992658 10.3390/i.jms21197139  
positive Expression: AKT1 --> CI 33116132 10.1038/s41467-020-19288-6  
positive Expression: AKT1 --> CI 33241021 10.21037/atm-20-586510.21037/atm-20-5865  
positive Expression: AKT1 --> CD274 10.1016/j.urolonc.2020.11.029  
positive Expression: AKT1 --> CI 33301862 10.1016/j.semcancer.2020.12.001  
positive Expression: AKT1 --> CI 33271941 10.3390/i.jms21239165  
positive Expression: AKT1 --> CI 32152439 10.1038/s41401-020-0366-x  
positive Expression: AKT1 --> CD274 10.3727/096504020X15925659763817  
positive Expression: AKT1 --> CI 32603752 10.1016/j.jid.2020.05.113  
positive Expression: AKT1 --> CI 33967272 10.1038/s41419-021-03745-1  
positive Expression: AKT1 --> CI 34098945 10.1186/s12935-021-02003-w  
positive Expression: AKT1 --> CI 34088360 10.1186/s13046-021-01987-7  
positive Expression: AKT1 --> CI 34088360 10.1186/s13046-021-01987-7  
positive Expression: AKT1 --> CI 34088360 10.1186/s13046-021-01987-7  
positive Expression: AKT1 --> CI 34108491 10.1038/s41467-021-23864-9  
positive Expression: AKT1 --> CI 34319029 10.31557/APJCP.2021.22.7.2069  
positive Expression: AKT1 --> CI 34639059 10.3390/i.jms221910719  
positive Expression: AKT1 --> CI 34599143 10.1038/s41419-021-04171-z  
positive Expression: AKT1 --> CI 34548615 10.1038/s12276-021-00670-3  
positive Expression: AKT1 --> CI 34548615 10.1038/s12276-021-00670-3  
positive Expression: AKT1 --> CI 34666670 10.1186/s10020-021-00384-2  
positive Expression: AKT1 --> CI 34666670 10.1186/s10020-021-00384-2  
positive Expression: AKT1 --> CI 34499223 10.1007/s00432-021-03792-3  
positive Expression: AKT1 --> CI 34718325 10.1038/s41419-021-04293-410.1038/s41419-021-  
positive Expression: AKT1 --> CI 34718325 10.1038/s41419-021-04293-4  
positive Expression: AKT1 --> CI 34718325 10.1038/s41419-021-04293-4  
positive Expression: AKT1 --> CI 34830179 10.3390/i.jms222212297  
positive Expression: AKT1 --> CI 34830179 10.3390/i.jms222212297  
positive Expression: AKT1 --> CI 34830179 10.3390/i.jms222212297  
positive Expression: AKT1 --> CI 34830209 10.3390/i.jms222212330  
positive Expression: AKT1 --> CI 34480337 10.1007/s12035-021-02495-7  
positive Expression: AKT1 --> CI 35062949 10.1186/s12943-021-01489-2  
positive Expression: AKT1 --> CI 34839353 10.1038/s41388-021-02124-6  
positive Expression: AKT1 --> CI 35203446 10.3390/biomedicines1002023610.3390/biomedici  
positive Expression: AKT1 --> CI 35031925 10.1007/s11033-021-07063-9  
positive Expression: AKT1 --> CI 35305624 10.1186/s12935-022-02550-w  
positive Expression: AKT1 --> CI 32917780 10.2967/jnumed.120.250720  
positive Expression: AKT1 --> CI 32917780 10.2967/jnumed.120.250720  
positive Expression: AKT1 --> CI 32917780 10.2967/jnumed.120.250720  
positive Expression: AKT1 --> CI 35414774 10.7150/i.jbs.67200  
positive Expression: AKT1 --> CI 35610613 10.1186/s12885-022-09675-1  
positive Expression: AKT1 --> CI 35628647 10.3390/i.jms23105837  
positive Expression: AKT1 --> CI 35682571 10.3390/i.jms23115892  
positive Expression: AKT1 --> CI 35682571 10.3390/i.jms23115892  
positive Expression: AKT1 --> CI 35817272 10.1016/j.i.jpharm.2022.122002  
positive Expression: AKT1 --> CI 35917090 10.1007/s13258-022-01291-4  
positive Expression: AKT1 --> CI 35638450 10.1042/BSR20212051  
positive Expression: AKT1 --> CI 35955729 10.3390/i.jms23158599  
positive Expression: AKT1 --> CI 36233088 10.3390/i.jms231911789  
positive Expression: AKT1 --> CI 36245982 10.1155/2022/5233222  
positive Expression: AKT1 --> CI 36245982 10.1155/2022/5233222

positive Expression: AKT1 --> CI 36313041 10. 7150/jca. 77619  
 positive Expression: AKT1 --> CI 36313041 10. 7150/jca. 77619  
 positive Expression: AKT1 --> CI 36348350 10. 1186/s12964-022-00981-6  
 positive Expression: AKT1 --> CI 36430322 10. 3390/ijms232213846  
 positive Expression: AKT1 --> CI 36499710 10. 3390/ijms232315384  
 positive Expression: AKT1 --> CI 36528587 10. 1186/s12935-022-02805-6  
 Regulation: CD274 ---> AKT1 31668739 10. 1016/j. cellimm. 2019. 103957  
 Regulation: CD274 ---> AKT1 33771483 10. 1016/j. yexcr. 2021. 112575  
 Regulation: CD274 ---> AKT1 22337882 10. 1074/jbc. M111. 283705  
 Regulation: CD274 ---> AKT1 33065462 10. 1016/j. lungcan. 2020. 10. 004  
 Regulation: CD274 ---> AKT1 32428662 10. 1016/j. canlet. 2020. 05. 003  
 Regulation: CD274 ---> AKT1 30318472 10. 1016/j. bbcan. 2018. 08. 001  
 Regulation: CD274 ---> AKT1 28477990 10. 1016/j. maturitas. 2017. 04. 014  
 Regulation: CD274 ---> AKT1 29510196 10. 1016/j. bbadis. 2018. 03. 002  
 Regulation: CD274 ---> AKT1 31063806 10. 1016/j. phrs. 2019. 104258  
 Regulation: CD274 ---> AKT1 33301862 10. 1016/j. semcancer. 2020. 12. 001  
 Regulation: CD274 ---> AKT1 33301862 10. 1016/j. semcancer. 2020. 12. 001  
 Regulation: CD274 ---> AKT1 28887097 10. 1016/j. urolonc. 2017. 08. 010  
 Regulation: CD274 ---> AKT1 31005030 10. 1016/j. drup. 2019. 04. 001  
 Regulation: CD274 ---> AKT1 27964820 10. 1016/j. it. 2016. 11. 005  
 Regulation: CD274 ---> AKT1 29576280 10. 1016/j. hbpd. 2018. 03. 001  
 Regulation: CD274 ---> AKT1 32663768 10. 1016/j. intimp. 2020. 106759  
 Regulation: CD274 ---> AKT1 33581579 10. 1016/j. intimp. 2021. 107443  
 Regulation: CD274 ---> AKT1 33581579 10. 1016/j. intimp. 2021. 107443  
 Regulation: CD274 ---> AKT1 26321679 10. 1016/j. cell. 2015. 08. 016  
 Regulation: CD274 ---> AKT1 28703774 10. 3390/ijms18071517  
 Regulation: CD274 ---> AKT1 28692048 10. 1038/onc. 2017. 209  
 Regulation: CD274 ---> AKT1 28692048 10. 1038/onc. 2017. 209  
 Regulation: CD274 ---> AKT1 28692048 10. 1038/onc. 2017. 209  
 Regulation: CD274 ---> AKT1 28982322 10. 2174/1381612823666171004120152  
 Regulation: CD274 ---> AKT1 30078052 10. 1007/s00262-018-2221-1  
 Regulation: CD274 ---> AKT1 30808044 10. 1055/s-0039-1679909  
 Regulation: CD274 ---> AKT1 32020232 10. 3892/or. 2020. 7477  
 Regulation: CD274 ---> AKT1 32020232 10. 3892/or. 2020. 7477  
 Regulation: CD274 ---> AKT1 30368626 10. 1007/s10637-018-0678-6  
 Regulation: CD274 ---> AKT1 32161124 10. 1073/pnas. 1921445117  
 Regulation: CD274 ---> AKT1 31853007 10. 1038/s41416-019-0697-x  
 Regulation: CD274 ---> AKT1 32868929 10. 1038/s41590-020-0769-3  
 Regulation: CD274 ---> AKT1 33472580 10. 1186/s11658-020-00246-5  
 Regulation: CD274 ---> AKT1 10. 5483/BMBRep. 2021. 54. 1. 241  
 Regulation: CD274 ---> AKT1 10. 5483/BMBRep. 2021. 54. 1. 241  
 Regulation: CD274 ---> AKT1 10. 5483/BMBRep. 2021. 54. 1. 241  
 Regulation: CD274 ---> AKT1 33112410 10. 14670/HH-18-272  
 Regulation: CD274 ---> AKT1 34326692 10. 7150/ijbs. 60114  
 Regulation: CD274 ---> AKT1 21899511  
 Regulation: CD274 ---> AKT1 22337882 10. 1074/jbc. M111. 283705  
 Regulation: CD274 ---> AKT1 23267208 10. 2332/allergolint. 12-0A-0450  
 Regulation: CD274 ---> AKT1 25057927 10. 1097/SHK. 0000000000000247  
 Regulation: CD274 ---> AKT1 25609381 10. 1038/ncomms6997  
 Regulation: CD274 ---> AKT1 26927206 10. 1146/annurev-immunol-032414-112049  
 Regulation: CD274 ---> AKT1 27671847 10. 1002/stem. 250910. 1002/stem. 2509

Regulation: CD274 ---> AKT1 29245948 10.18632/oncotarget.2191410.18632/oncotarget.  
 Regulation: CD274 ---> AKT1 31850228 10.3389/fonc.2019.0134710.3389/fonc.2019.0134  
 Regulation: CD274 ---> AKT1 32277292 10.1007/s12032-020-01372-y10.1007/s12032-020-  
 Regulation: CD274 ---> AKT1 919 10.1016/j.it.2016.11.005  
 Regulation: CD274 ---> AKT1 445 10.1016/j.maturitas.2017.04.014  
 Regulation: CD274 ---> AKT1 10.1016/j.cellimm.2019.103957  
 Regulation: CD274 ---> AKT1 10.3892/or.2020.7477  
 Regulation: CD274 ---> AKT1 10.3892/or.2020.7477  
 Regulation: CD274 ---> AKT1 10.1038/s41416-019-0697-x  
 Regulation: CD274 ---> AKT1 10.1097/SHK.0000000000000247  
 Regulation: CD274 ---> AKT1 10.14670/HH-18-272  
 Regulation: CD274 ---> AKT1 34847253 10.1096/fj.202101306R  
 Regulation: CD274 ---> AKT1 34482409 10.1007/s00262-021-03041-z  
 Regulation: CD274 ---> AKT1 35409396 10.3390/i jms23074037  
 Regulation: CD274 ---> AKT1 33030957 10.4149/neo\_2020\_200531N589  
 Regulation: CD274 ---> AKT1 33030957 10.4149/neo\_2020\_200531N589  
 Regulation: CD274 ---> AKT1 35444235 10.1038/s41419-022-04821-w  
 Regulation: CD274 ---> AKT1 35684481 10.3390/molecules27113545  
 Regulation: CD274 ---> AKT1 35301651 10.1007/s11033-022-07246-y  
 Regulation: CD274 ---> AKT1 36175691 10.1007/s12032-022-01842-5  
 Regulation: CD274 ---> AKT1 36232331 10.3390/i jms231911031  
 positive Expression: MAPK1 --> F23051672 10.1016/j.ejphar.2012.09.046  
 positive Expression: MAPK1 --> F30834839 10.2174/1568026619666190305130141  
 positive Expression: MAPK1 --> F22787275 10.1091/mbc.E12-02-0132  
 positive Expression: MAPK1 --> F24324065  
 positive Expression: MAPK1 --> F26883473 10.3892/or.2016.4622  
 positive Expression: MAPK1 --> F22787275 10.1091/mbc.E12-02-013210.1091/mbc.E12-02-013  
 positive Expression: MAPK1 --> F16997801  
 positive Expression: MAPK1 --> F25446102 10.1016/j.bbrc.2014.11.038  
 positive Expression: MAPK1 --> F19520853 10.1074/jbc.M109.026013  
 positive Expression: MAPK1 --> F29203148 10.1016/j.lfs.2017.12.001  
 positive Expression: MAPK1 --> F33412209 10.1016/j.lfs.2020.118978  
 positive Expression: MAPK1 --> F33581126 10.1016/j.lfs.2021.119188  
 positive Expression: MAPK1 --> F27667695 10.1016/j.toxlet.2016.09.007  
 positive Expression: MAPK1 --> F32322463 10.1016/j.apsb.2019.10.003  
 positive Expression: MAPK1 --> F32322463 10.1016/j.apsb.2019.10.003  
 positive Expression: MAPK1 --> F20150434 10.2353/ajpath.2010.090850  
 positive Expression: MAPK1 --> F22634147 10.1016/j.freeradbiomed.2012.05.018  
 positive Expression: MAPK1 --> F24735948 10.1016/j.freeradbiomed.2014.04.004  
 positive Expression: MAPK1 --> F19520853  
 positive Expression: MAPK1 --> F19520853  
 positive Expression: MAPK1 --> F29115504 10.3892/mmr.2017.7967  
 positive Expression: MAPK1 --> F29405820 10.1080/15384047.2018.1436024  
 positive Expression: MAPK1 --> F29943652 10.1089/ars.2017.7234  
 positive Expression: MAPK1 --> F31776989 10.1007/978-981-15-0602-4\_12  
 positive Expression: MAPK1 --> F32271449 10.26355/eurrev\_202003\_20699  
 positive Expression: MAPK1 --> F33287140 10.3390/i jms21239210  
 positive Expression: MAPK1 --> F22466960 10.1254/jphs.11181FP  
 positive Expression: MAPK1 --> F21768780 10.4161/cbt.12.8.15978  
 positive Expression: MAPK1 --> F24305604 10.1186/1756-9966-32-99  
 positive Expression: MAPK1 --> F24416349 10.1371/journal.pone.0085116

positive Expression: MAPK1 --> F24416349 10.1371/journal.pone.0085116  
positive Expression: MAPK1 --> F24416349 10.1371/journal.pone.0085116  
positive Expression: MAPK1 --> F24603327 10.1038/cddis.2014.64  
positive Expression: MAPK1 --> F22674982 10.1128/JVI.00616-12  
positive Expression: MAPK1 --> F25760151 10.1055/s-0034-1398494  
positive Expression: MAPK1 --> F25866220 10.4149/neo\_2015\_047  
positive Expression: MAPK1 --> F24416349 10.1371/journal.pone.008511610.1371/journal.p  
positive Expression: MAPK1 --> F25348263 10.1111/jnc.1298010.1111/jnc.12980  
positive Expression: MAPK1 --> BECN1 10.1016/j.apsb.2019.10.003  
positive Expression: MAPK1 --> BECN1 10.1016/j.apsb.2019.10.003  
positive Expression: MAPK1 --> BECN1 10.1016/j.bbrc.2014.11.038  
positive Expression: MAPK1 --> BECN1 10.1007/978-981-15-0602-4\_12  
positive Expression: MAPK1 --> F19748465 10.1016/j.chom.2009.08.004  
positive Expression: MAPK1 --> F25934479 10.1016/j.healun.2014.12.008  
positive Expression: MAPK1 --> F29405820 10.1080/15384047.2018.1436024  
positive Expression: MAPK1 --> F912 10.1016/j.cytogfr.2018.07.001  
positive Expression: MAPK1 --> F29620175 10.3892/mmr.2018.8818  
positive Expression: MAPK1 --> F35588334 10.1007/s00018-022-04319-w  
positive Expression: NGF --> BEC 31698410 10.1038/s41390-019-0657-4  
negative Expression: AKT1 ---| TF18948082 10.1016/j.bbrc.2008.10.054  
negative Expression: AKT1 ---| TF29944886 10.1016/j.bbrc.2018.06.127  
negative Expression: AKT1 ---| TF16728701 10.1182/blood-2006-02-001354  
negative Expression: AKT1 ---| TF32315388 10.1182/blood.2019003538  
negative Expression: AKT1 ---| TF26764128 10.1016/j.ydbio.2015.12.027  
negative Expression: AKT1 ---| TF32949604 10.1016/j.ejphar.2020.173580  
negative Expression: AKT1 ---| TF33345853 10.1016/j.ejphar.2020.173796  
negative Expression: AKT1 ---| TF33662352 10.1016/j.ejphar.2021.173957  
negative Expression: AKT1 ---| TF32561481 10.1016/j.exer.2020.108116  
negative Expression: AKT1 ---| TF26878368 10.1016/j.atherosclerosis.2016.02.002  
negative Expression: AKT1 ---| TF11054421 10.1074/jbc.M008552200  
negative Expression: AKT1 ---| TF14559897 10.1074/jbc.M310208200  
negative Expression: AKT1 ---| TF19376776 10.1074/jbc.M109.002105  
negative Expression: AKT1 ---| TF19376776 10.1074/jbc.M109.002105  
negative Expression: AKT1 ---| TF14701854 10.1074/jbc.M312333200  
negative Expression: AKT1 ---| TF19605357 10.1074/jbc.M109.034629  
negative Expression: AKT1 ---| TF25210032 10.1074/jbc.M114.565796  
negative Expression: AKT1 ---| TF25210032 10.1074/jbc.M114.565796  
negative Expression: AKT1 ---| TF22334668 10.1074/jbc.M111.333922  
negative Expression: AKT1 ---| TF22334668 10.1074/jbc.M111.333922  
negative Expression: AKT1 ---| TF22334668 10.1074/jbc.M111.333922  
negative Expression: AKT1 ---| TF21778238 10.1074/jbc.M111.267633  
negative Expression: AKT1 ---| TF21778238 10.1074/jbc.M111.267633  
negative Expression: AKT1 ---| TF15799971 10.1074/jbc.M414464200  
negative Expression: AKT1 ---| TF15805113 10.1074/jbc.M414091200  
negative Expression: AKT1 ---| TF15805113 10.1074/jbc.M414091200  
negative Expression: AKT1 ---| TF18467333 10.1074/jbc.M709695200  
negative Expression: AKT1 ---| TF27373978 10.1016/j.jid.2016.06.610  
negative Expression: AKT1 ---| TF32931807 10.1016/j.jid.2020.08.019  
negative Expression: AKT1 ---| TF28202289 10.1016/j.lfs.2017.02.005  
negative Expression: AKT1 ---| TF31678282 10.1016/j.lfs.2019.116880  
negative Expression: AKT1 ---| TF33121990 10.1016/j.lfs.2020.118672  
negative Expression: AKT1 ---| TF28844836 10.1016/j.bbamcr.2017.08.008  
negative Expression: AKT1 ---| TF24801417 10.1016/j.jhep.2014.04.035  
negative Expression: AKT1 ---| TF24801417 10.1016/j.jhep.2014.04.035

negative Expression: AKT1 ---| TF 32222662 10.1016/j.ejmech.2020.112207  
 negative Expression: AKT1 ---| TF 31918176 10.1016/j.nutres.2019.12.004  
 negative Expression: AKT1 ---| TF 31150783 10.1016/j.fct.2019.05.041  
 negative Expression: AKT1 ---| TF 32871194 10.1016/j.fct.2020.111714  
 negative Expression: AKT1 ---| TF 33232793 10.1016/j.biochi.2020.11.015  
 negative Expression: AKT1 ---| TF 26902421 10.1016/j.canlet.2016.02.023  
 negative Expression: AKT1 ---| TF 26902421 10.1016/j.canlet.2016.02.023  
 negative Expression: AKT1 ---| TF 26902421 10.1016/j.canlet.2016.02.023  
 negative Expression: AKT1 ---| TF 26902421 10.1016/j.canlet.2016.02.023  
 negative Expression: AKT1 ---| TF 30419311 10.1016/j.bbcan.2018.10.001  
 negative Expression: AKT1 ---| TF 32050108 10.1016/j.ctrv.2020.101975  
 negative Expression: AKT1 ---| TF 27461822 10.1016/j.prp.2016.06.005  
 negative Expression: AKT1 ---| TF 28322991 10.1016/j.gene.2017.03.014  
 negative Expression: AKT1 ---| TF 28922731 10.1016/j.biopha.2017.09.023  
 negative Expression: AKT1 ---| TF 29324311 10.1016/j.biopha.2018.01.030  
 negative Expression: AKT1 ---| TF 29635125 10.1016/j.biopha.2018.03.126  
 negative Expression: AKT1 ---| TF 29635125 10.1016/j.biopha.2018.03.126  
 negative Expression: AKT1 ---| TF 29635125 10.1016/j.biopha.2018.03.126  
 negative Expression: AKT1 ---| TF 20943647 10.1093/annonc/mdq366  
 negative Expression: AKT1 ---| TF 31323288 10.1016/j.semcancer.2019.07.009  
 negative Expression: AKT1 ---| TF 27818144 10.1016/j.molcel.2016.10.002  
 negative Expression: AKT1 ---| TF 32442683 10.1016/j.micinf.2020.04.010  
 negative Expression: AKT1 ---| TP53 10.1016/j.procbio.2018.12.010  
 negative Expression: AKT1 ---| TF 28993289 10.1016/j.arr.2017.10.001  
 negative Expression: AKT1 ---| TF 32846356 10.1016/j.dnarep.2020.102952  
 negative Expression: AKT1 ---| TF 26522297 10.1016/j.apjtm.2015.09.008  
 negative Expression: AKT1 ---| TF 33869685 10.1016/j.reth.2021.02.002  
 negative Expression: AKT1 ---| TF 28844411 10.1016/j.ebiom.2017.08.018  
 negative Expression: AKT1 ---| TF 20079716 10.1016/j.bbrc.2010.01.038  
 negative Expression: AKT1 ---| TF 20079716 10.1016/j.bbrc.2010.01.038  
 negative Expression: AKT1 ---| TF 20079716 10.1016/j.bbrc.2010.01.038  
 negative Expression: AKT1 ---| TF 14988039 10.1016/j.brainres.2003.12.021  
 negative Expression: AKT1 ---| TF 20096282 10.1016/j.ejphar.2010.01.004  
 negative Expression: AKT1 ---| TF 21930127 10.1016/j.yexcr.2011.08.013  
 negative Expression: AKT1 ---| TF 16616141 10.1016/j.febslet.2006.03.055  
 negative Expression: AKT1 ---| TF 18325394 10.1053/j.gastro.2008.01.079  
 negative Expression: AKT1 ---| TF 21723221 10.1053/j.gastro.2011.06.056  
 negative Expression: AKT1 ---| TF 17306348 10.1016/j.ygyno.2006.12.030  
 negative Expression: AKT1 ---| TF 18485879 10.1016/j.cell.2008.03.021  
 negative Expression: AKT1 ---| TF 14613025 10.1053/j.seminoncol.2003.08.006  
 negative Expression: AKT1 ---| TF 12085086 10.1067/mcn.2002.125874  
 negative Expression: AKT1 ---| TF 21440011 10.1016/j.bbamcr.2011.03.010  
 negative Expression: AKT1 ---| TF 20691487 10.1016/j.tibtech.2010.06.005  
 negative Expression: AKT1 ---| TF 17337084 10.1016/j.lungcan.2007.01.027  
 negative Expression: AKT1 ---| TF 19457607 10.1016/j.canlet.2009.04.035  
 negative Expression: AKT1 ---| TF 19457607 10.1016/j.canlet.2009.04.035  
 negative Expression: AKT1 ---| TF 22266095 10.1016/j.canlet.2012.01.003  
 negative Expression: AKT1 ---| TF 17293044 10.1016/j.neulet.2006.06.050  
 negative Expression: AKT1 ---| TF 21625365 10.1016/j.foodchem.2011.03.073  
 negative Expression: AKT1 ---| TF 26902421 10.1016/j.canlet.2016.02.023  
 negative Expression: AKT1 ---| TF 18325394 10.1053/j.gastro.2008.01.079  
 negative Expression: AKT1 ---| TF 12941408 10.1016/s1369-5274(03)00085-7  
 negative Expression: AKT1 ---| TF 23375534 10.1016/j.jcms.2012.12.006  
 negative Expression: AKT1 ---| TF 26878368 10.1016/j.atherosclerosis.2016.02.002

negative Expression: AKT1 ---| TF25172547 10.1016/j.imbio.2014.08.010  
 negative Expression: AKT1 ---| TF22033326 10.1016/j.ejca.2011.09.014  
 negative Expression: AKT1 ---| TF18174288 10.1210/en.2007-0844  
 negative Expression: AKT1 ---| TF23137567 10.1016/j.bbalip.2012.10.008  
 negative Expression: AKT1 ---| TF16697215 10.1016/j.semcan.2006.03.009  
 negative Expression: AKT1 ---| TF19539777 10.1016/j.biocel.2009.06.004  
 negative Expression: AKT1 ---| TF24801417 10.1016/j.jhep.2014.04.035  
 negative Expression: AKT1 ---| TF26066464 10.1016/j.meegid.2015.06.008  
 negative Expression: AKT1 ---| TF17416211 10.1016/j.dnarep.2007.02.028  
 negative Expression: AKT1 ---| TF17306348 10.1016/j.ygyno.2006.12.030  
 negative Expression: AKT1 ---| TF25466518 10.1016/j.jss.2014.10.042  
 negative Expression: AKT1 ---| TF22266095 10.1016/j.canlet.2012.01.003  
 negative Expression: AKT1 ---| TF18485879 10.1016/j.cell.2008.03.021  
 negative Expression: AKT1 ---| TF897 10.1007/978-1-4684-3261-9\_15  
 negative Expression: AKT1 ---| TF25976245 10.1016/j.ajpath.2015.02.023  
 negative Expression: AKT1 ---| TF20691487 10.1016/j.tibtech.2010.06.005  
 negative Expression: AKT1 ---| TF22270165 10.1016/j.ijrobp.2011.08.005  
 negative Expression: AKT1 ---| TF19457607 10.1016/j.canlet.2009.04.035  
 negative Expression: AKT1 ---| TF25289770 10.1016/j.cbi.2014.09.023  
 negative Expression: AKT1 ---| TF21440011 10.1016/j.bbamcr.2011.03.010  
 negative Expression: AKT1 ---| TF20399660 10.1016/j.tcb.2010.03.004  
 negative Expression: AKT1 ---| TF21930127 10.1016/j.yexcr.2011.08.013  
 negative Expression: AKT1 ---| TF22841670 10.1016/j.ejphar.2012.06.045  
 negative Expression: AKT1 ---| TF12620407 10.1016/s1535-6108(03)00021-7  
 negative Expression: AKT1 ---| TF25217104 10.1016/j.molonc.2014.08.005  
 negative Expression: AKT1 ---| TF26764128 10.1016/j.ydbio.2015.12.027  
 negative Expression: AKT1 ---| TF25617127 10.1016/j.biomaterials.2014.12.023  
 negative Expression: AKT1 ---| TF26033200 10.1016/j.pbiomolbio.2015.05.004  
 negative Expression: AKT1 ---| TF27373978 10.1016/j.jid.2016.06.610  
 negative Expression: AKT1 ---| TF17293044 10.1016/j.neulet.2006.06.050  
 negative Expression: AKT1 ---| TF11983168 10.1016/s1097-2765(02)00504-x  
 negative Expression: AKT1 ---| TF26522297 10.1016/j.apjtm.2015.09.008  
 negative Expression: AKT1 ---| TF14988039 10.1016/j.brainres.2003.12.021  
 negative Expression: AKT1 ---| TF21625365 10.1016/j.foodchem.2011.03.073  
 negative Expression: AKT1 ---| TF24607498 10.1016/j.biocel.2014.02.020  
 negative Expression: AKT1 ---| TF27208405 10.1016/j.placenta.2016.03.001  
 negative Expression: AKT1 ---| TF17337084 10.1016/j.lungcan.2007.01.027  
 negative Expression: AKT1 ---| TF24998604 10.1016/j.bbamcr.2014.06.017  
 negative Expression: AKT1 ---| TF16616141 10.1016/j.febslet.2006.03.055  
 negative Expression: AKT1 ---| TF17336087 10.1016/j.critrevonc.2007.02.001  
 negative Expression: AKT1 ---| TF12049739 10.1016/s1097-2765(02)00520-8  
 negative Expression: AKT1 ---| TF27461822 10.1016/j.prp.2016.06.005  
 negative Expression: AKT1 ---| TF16527552 10.1016/j.dld.2006.01.012  
 negative Expression: AKT1 ---| TF23142241 10.1016/j.lfs.2012.10.023  
 negative Expression: AKT1 ---| TF16026734 10.1016/j.beha.2005.01.003  
 negative Expression: AKT1 ---| TF24801546 10.1016/j.neuint.2014.04.016  
 negative Expression: AKT1 ---| TF20096282 10.1016/j.ejphar.2010.01.004  
 negative Expression: AKT1 ---| TF1050 10.1016/j.ebiom.2017.08.018  
 negative Expression: AKT1 ---| TF21723221 10.1053/j.gastro.2011.06.056  
 negative Expression: AKT1 ---| TP53 10.1016/j.ejca.2011.09.014  
 negative Expression: AKT1 ---| TP53 10.1016/j.jss.2014.10.042  
 negative Expression: AKT1 ---| TP53 10.1016/j.ijrobp.2011.08.005  
 negative Expression: AKT1 ---| TP53 10.1016/j.semcd.2004.01.002  
 negative Expression: AKT1 ---| TP53 10.1016/j.bbrc.2008.10.054



|                           |     |             |                                               |
|---------------------------|-----|-------------|-----------------------------------------------|
| negative Expression: AKT1 | --- | TP53        | 10.1053/j.seminonc.2003.08.006                |
| negative Expression: AKT1 | --- | TP53        | 10.1016/j.foodchem.2011.03.073                |
| negative Expression: AKT1 | --- | TP53        | 10.1016/j.jbiotec.2014.07.331                 |
| negative Expression: AKT1 | --- | TP53        | 10.1016/j.path.2010.04.001                    |
| negative Expression: AKT1 | --- | TP53        | 10.1016/j.ejca.2005.02.011                    |
| negative Expression: AKT1 | --- | TP53        | 10.1067/mcn.2002.125874                       |
| negative Expression: AKT1 | --- | TP53        | 10.1016/S1535-6108(03)00248-4                 |
| negative Expression: AKT1 | --- | TP53        | 10.1016/S0959-437X(02)00274-5                 |
| negative Expression: AKT1 | --- | TP53        | 10.1016/S1097-2765(02)00776-1                 |
| negative Expression: AKT1 | --- | TF344445509 | 10.3390/ijms22168805                          |
| negative Expression: AKT1 | --- | TF34417460  | 10.1038/s41467-021-25390-0                    |
| negative Expression: AKT1 | --- | TF21040738  | 10.1016/j.mrfmmm.2010.10.00710.1016/j.mrfmmm. |
| negative Expression: AKT1 | --- | TF23238568  | 10.1038/cdd.2012.15310.1038/cdd.2012.153      |
| negative Expression: AKT1 | --- | TF23843462  | 10.1074/jbc.M112.44514810.1074/jbc.M112.44514 |
| negative Expression: AKT1 | --- | TF24525337  | 10.18632/oncotarget.1328                      |
| negative Expression: AKT1 | --- | TF24525337  | 10.18632/oncotarget.1328                      |
| negative Expression: AKT1 | --- | TF32404543  | 10.1248/bpb.b20-00094                         |
| negative Expression: AKT1 | --- | TF897       | 10.1016/j.molcel.2016.10.002                  |
| negative Expression: AKT1 | --- | TF1050      | 10.1016/j.ebiom.2017.08.018                   |
| negative Expression: AKT1 | --- | TP53        | 10.1016/j.semcancer.2019.07.009               |
| negative Expression: AKT1 | --- | TF20399660  | 10.1016/j.tcb.2010.03.004                     |
| negative Expression: AKT1 | --- | TF17336087  | 10.1016/j.critrevonc.2007.02.001              |
| negative Expression: AKT1 | --- | TF16697215  | 10.1016/j.semcancer.2006.03.009               |
| negative Expression: AKT1 | --- | TF11983168  | 10.1016/S1097-2765(02)00504-X                 |
| negative Expression: AKT1 | --- | TF12049739  | 10.1016/S1097-2765(02)00520-8                 |
| negative Expression: AKT1 | --- | TF19539777  | 10.1016/j.biocel.2009.06.004                  |
| negative Expression: AKT1 | --- | TF12941408  | 10.1016/S1369-5274(03)00085-7                 |
| negative Expression: AKT1 | --- | TF16026734  | 10.1016/j.beha.2005.01.003                    |
| negative Expression: AKT1 | --- | TF12620407  | 10.1016/S1535-6108(03)00021-7                 |
| negative Expression: AKT1 | --- | TF12620407  | 10.1016/S1535-6108(03)00021-7                 |
| negative Expression: AKT1 | --- | TF12620407  | 10.1016/S1535-6108(03)00021-7                 |
| negative Expression: AKT1 | --- | TF17416211  | 10.1016/j.dnarep.2007.02.028                  |
| negative Expression: AKT1 | --- | TF16527552  | 10.1016/j.dld.2006.01.012                     |
| negative Expression: AKT1 | --- | TF22841670  | 10.1016/j.ejphar.2012.06.045                  |
| negative Expression: AKT1 | --- | TF22270165  | 10.1016/j.ijrobp.2011.08.005                  |
| negative Expression: AKT1 | --- | TF22033326  | 10.1016/j.ejca.2011.09.014                    |
| negative Expression: AKT1 | --- | TF23142241  | 10.1016/j.lfs.2012.10.023                     |
| negative Expression: AKT1 | --- | TF23375534  | 10.1016/j.jcms.2012.12.006                    |
| negative Expression: AKT1 | --- | TF23137567  | 10.1016/j.bbalip.2012.10.008                  |
| negative Expression: AKT1 | --- | TF24607498  | 10.1016/j.biocel.2014.02.020                  |
| negative Expression: AKT1 | --- | TF25289770  | 10.1016/j.cbi.2014.09.023                     |
| negative Expression: AKT1 | --- | TF24998604  | 10.1016/j.bbamcr.2014.06.017                  |
| negative Expression: AKT1 | --- | TF25172547  | 10.1016/j.imbio.2014.08.010                   |
| negative Expression: AKT1 | --- | TF24801546  | 10.1016/j.neuint.2014.04.016                  |
| negative Expression: AKT1 | --- | TF25217104  | 10.1016/j.molonc.2014.08.005                  |
| negative Expression: AKT1 | --- | TF25976245  | 10.1016/j.ajpath.2015.02.023                  |
| negative Expression: AKT1 | --- | TF25466518  | 10.1016/j.jss.2014.10.042                     |
| negative Expression: AKT1 | --- | TF25617127  | 10.1016/j.biomaterials.2014.12.023            |
| negative Expression: AKT1 | --- | TF26066464  | 10.1016/j.meegid.2015.06.008                  |
| negative Expression: AKT1 | --- | TF26066464  | 10.1016/j.meegid.2015.06.008                  |
| negative Expression: AKT1 | --- | TF27208405  | 10.1016/j.placenta.2016.03.001                |
| negative Expression: AKT1 | --- | TP53        | 10.1042/BCJ20190888                           |
| negative Expression: AKT1 | --- | TF32855630  | 10.1155/2020/3608315                          |
| negative Expression: AKT1 | --- | TF27746632  | 10.5021/ad.2016.28.5.548                      |

negative Expression: AKT1 ---| TF 30697266 10. 5114/aoms. 2018. 7402610. 5114/aoms. 2018. 7402  
negative Expression: AKT1 ---| TF 31086728 10. 7717/peerj. 671610. 7717/peerj. 6716  
negative Expression: AKT1 ---| TF 32581555 10. 2147/OTT. S24670610. 2147/OTT. S246706  
negative Expression: AKT1 ---| TF 26033200 10. 1016/j. pbiomolbio. 2015. 05. 004  
negative Expression: AKT1 ---| TF 18174288 10. 1210/en. 2007-0844  
negative Expression: AKT1 ---| TF 27629785 10. 1007/s11010-016-2809-8  
negative Expression: AKT1 ---| TF 27560518 10. 1371/journal. pone. 0161508  
negative Expression: AKT1 ---| TF 25144704 10. 1371/journal. pntd. 0003106  
negative Expression: AKT1 ---| TF 25144704 10. 1371/journal. pntd. 0003106  
negative Expression: AKT1 ---| TF 16540659  
negative Expression: AKT1 ---| TF 16330492  
negative Expression: AKT1 ---| TF 24213576 10. 1038/onc. 2013. 477  
negative Expression: AKT1 ---| TF 11923280  
negative Expression: AKT1 ---| TF 17684018  
negative Expression: AKT1 ---| TF 22975685 10. 1016/j. cellsig. 2012. 09. 009  
negative Expression: AKT1 ---| TF 15862750  
negative Expression: AKT1 ---| TF 11715018  
negative Expression: AKT1 ---| TF 25301184 10. 1152/ajpgi. 00151. 2014  
negative Expression: AKT1 ---| TF 19376776 10. 1074/jbc. M109. 002105  
negative Expression: AKT1 ---| TF 22395446 10. 1007/s10495-012-0712-7  
negative Expression: AKT1 ---| TF 24149576 10. 1038/ncomms3544  
negative Expression: AKT1 ---| TF 17725107  
negative Expression: AKT1 ---| TF 22417301 10. 1111/j. 1600-0625. 2012. 01448. x  
negative Expression: AKT1 ---| TF 17709487  
negative Expression: AKT1 ---| TF 25109960 10. 1042/BST20140070  
negative Expression: AKT1 ---| TP53 10. 1016/j. apsb. 2012. 05. 003  
negative Expression: AKT1 ---| TF 23462616 10. 1016/j. freeradbiomed. 2013. 02. 009  
negative Expression: AKT1 ---| TF 12738763  
negative Expression: AKT1 ---| TF 12738763  
negative Expression: AKT1 ---| TF 19376776  
negative Expression: AKT1 ---| TF 19376776  
negative Expression: AKT1 ---| TF 19376776  
negative Expression: AKT1 ---| TF 18467333  
negative Expression: AKT1 ---| TF 17684018  
negative Expression: AKT1 ---| TF 15805113  
negative Expression: AKT1 ---| TF 15799971  
negative Expression: AKT1 ---| TF 15746177  
negative Expression: AKT1 ---| TF 14701854  
negative Expression: AKT1 ---| TF 14580260  
negative Expression: AKT1 ---| TF 12517744  
negative Expression: AKT1 ---| TF 12517744  
negative Expression: AKT1 ---| TF 12042314  
negative Expression: AKT1 ---| TF 11923280  
negative Expression: AKT1 ---| TF 11923280  
negative Expression: AKT1 ---| TF 11923280  
negative Expression: AKT1 ---| TF 11923280  
negative Expression: AKT1 ---| TF 11923280  
negative Expression: AKT1 ---| TF 11923280  
negative Expression: AKT1 ---| TF 11923280  
negative Expression: AKT1 ---| TF 11923280  
negative Expression: AKT1 ---| TF 11923280  
negative Expression: AKT1 ---| TF 11923280  
negative Expression: AKT1 ---| TF 11923280  
negative Expression: AKT1 ---| TF 11923280  
negative Expression: AKT1 ---| TF 11923280  
negative Expression: AKT1 ---| TF 17122210  
negative Expression: AKT1 ---| TF 14670833

negative Expression: AKT1 ---| TF 11504915  
 negative Expression: AKT1 ---| TF 11504915  
 negative Expression: AKT1 ---| TF 16007156  
 negative Expression: AKT1 ---| TF 15933740  
 negative Expression: AKT1 ---| TF 15150572  
 negative Expression: AKT1 ---| TF 14713953  
 negative Expression: AKT1 ---| TF 16982679  
 negative Expression: AKT1 ---| TF 20676365  
 negative Expression: AKT1 ---| TF 20436671  
 negative Expression: AKT1 ---| TF 22641480 10. 3892/or. 2012. 1827  
 negative Expression: AKT1 ---| TF 23095642 10. 4161/cc. 22413  
 negative Expression: AKT1 ---| TF 22020565 10. 1007/s00394-011-0260-x  
 negative Expression: AKT1 ---| TF 23390564  
 negative Expression: AKT1 ---| TF 23267122  
 negative Expression: AKT1 ---| TF 20491628 10. 2174/138920310791824039  
 negative Expression: AKT1 ---| TF 21460185 10. 1091/mbc. E10-11-0923  
 negative Expression: AKT1 ---| TF 21460185 10. 1091/mbc. E10-11-0923  
 negative Expression: AKT1 ---| TF 21460185 10. 1091/mbc. E10-11-0923  
 negative Expression: AKT1 ---| TF 21460185 10. 1091/mbc. E10-11-0923  
 negative Expression: AKT1 ---| TF 21460185 10. 1091/mbc. E10-11-0923  
 negative Expression: AKT1 ---| TF 21460185 10. 1091/mbc. E10-11-0923  
 negative Expression: AKT1 ---| TF 21235352 10. 1089/ars. 2010. 3540  
 negative Expression: AKT1 ---| TF 21778238 10. 1074/jbc. M111. 267633  
 negative Expression: AKT1 ---| TF 21990374 10. 1096/fj. 11-190025  
 negative Expression: AKT1 ---| TF 22334668 10. 1074/jbc. M111. 333922  
 negative Expression: AKT1 ---| TF 22334668 10. 1074/jbc. M111. 333922  
 negative Expression: AKT1 ---| TF 22334668 10. 1074/jbc. M111. 333922  
 negative Expression: AKT1 ---| TF 22334668 10. 1074/jbc. M111. 333922  
 negative Expression: AKT1 ---| TF 22334668 10. 1074/jbc. M111. 333922  
 negative Expression: AKT1 ---| TF 22334668 10. 1074/jbc. M111. 333922  
 negative Expression: AKT1 ---| TF 22481935 10. 1155/2012/951724  
 negative Expression: AKT1 ---| TF 23202921 10. 3390/i jms131012710  
 negative Expression: AKT1 ---| TF 19728186 10. 1007/s12032-009-9295-8  
 negative Expression: AKT1 ---| TF 21870170 10. 1007/s12020-011-9524-8  
 negative Expression: AKT1 ---| TF 22157439 10. 1097/MOG. 0b013e32834dda51  
 negative Expression: AKT1 ---| TF 22611192 10. 1073/pnas. 1110287109  
 negative Expression: AKT1 ---| TF 23530877 10. 1186/1475-2840-12-52  
 negative Expression: AKT1 ---| TF 23410153 10. 2174/09298673113209990106  
 negative Expression: AKT1 ---| TF 23693014 10. 1186/1476-4598-12-44  
 negative Expression: AKT1 ---| TF 23693014 10. 1186/1476-4598-12-44  
 negative Expression: AKT1 ---| TF 23693014 10. 1186/1476-4598-12-44  
 negative Expression: AKT1 ---| TF 23693014 10. 1186/1476-4598-12-44  
 negative Expression: AKT1 ---| TP53 10. 1186/1743-422X-10-182  
 negative Expression: AKT1 ---| TF 20489726 10. 1038/cdd. 2010. 63  
 negative Expression: AKT1 ---| TF 22735455 10. 1038/ncomms1933  
 negative Expression: AKT1 ---| TF 23843462 10. 1074/jbc. M112. 445148  
 negative Expression: AKT1 ---| TF 21685937 10. 1038/onc. 2011. 198  
 negative Expression: AKT1 ---| TF 21743495 10. 1038/onc. 2011. 284  
 negative Expression: AKT1 ---| TF 21909130 10. 1038/onc. 2011. 394  
 negative Expression: AKT1 ---| TF 21909130 10. 1038/onc. 2011. 394  
 negative Expression: AKT1 ---| TF 22510990 10. 1038/embor. 2012. 53  
 negative Expression: AKT1 ---| TF 23470565 10. 1038/cgt. 2013. 14  
 negative Expression: AKT1 ---| TF 23787999 10. 1038/cdd. 2013. 63  
 negative Expression: AKT1 ---| TF 20676365 10. 1371/journal. pone. 0011813  
 negative Expression: AKT1 ---| TF 20386595 10. 1371/journal. pone. 0009999

negative Expression: AKT1 ---| TF20436671 10.1371/journal.pone.0010350  
 negative Expression: AKT1 ---| TF22928011 10.1371/journal.pone.0043646  
 negative Expression: AKT1 ---| TF23285096 10.1371/journal.pone.0052572  
 negative Expression: AKT1 ---| TF23114628 10.1099/vir.0.046052-0  
 negative Expression: AKT1 ---| TF23114628 10.1099/vir.0.046052-0  
 negative Expression: AKT1 ---| TF23638184 10.1371/journal.pone.0063179  
 negative Expression: AKT1 ---| TF24149576 10.1038/ncomms3544  
 negative Expression: AKT1 ---| TF24149576 10.1038/ncomms3544  
 negative Expression: AKT1 ---| TF24149576 10.1038/ncomms3544  
 negative Expression: AKT1 ---| TF24149576 10.1038/ncomms3544  
 negative Expression: AKT1 ---| TF24212374 10.1247/csf.13018  
 negative Expression: AKT1 ---| TF22296497 10.4149/neo\_2012\_035  
 negative Expression: AKT1 ---| TF23396362 10.1038/onc.2013.8  
 negative Expression: AKT1 ---| TF23396362 10.1038/onc.2013.8  
 negative Expression: AKT1 ---| TF23396362 10.1038/onc.2013.8  
 negative Expression: AKT1 ---| TF24479877 10.1210/me.2013-1266  
 negative Expression: AKT1 ---| TF23394468 10.3727/096368913X663578  
 negative Expression: AKT1 ---| TP53  
 negative Expression: AKT1 ---| TF24292837 10.1007/978-3-642-41199-1-16  
 negative Expression: AKT1 ---| TF24603851 10.3892/i.jo.2014.2322  
 negative Expression: AKT1 ---| TF24762959 10.1038/b.jc.2014.220  
 negative Expression: AKT1 ---| TF24762959 10.1038/b.jc.2014.220  
 negative Expression: AKT1 ---| TF24762959 10.1038/b.jc.2014.220  
 negative Expression: AKT1 ---| TF24971451 10.1371/journal.pone.0101277  
 negative Expression: AKT1 ---| TF24929707 10.1186/1471-2407-14-440  
 negative Expression: AKT1 ---| TF24096477 10.1038/onc.2013.410  
 negative Expression: AKT1 ---| TP53 10.1074/jbc.M114.565796  
 negative Expression: AKT1 ---| TP53 10.1074/jbc.M114.565796  
 negative Expression: AKT1 ---| TF25117830 10.1089/scd.2014.0058  
 negative Expression: AKT1 ---| TF25142166 10.1007/s11010-014-2198-9  
 negative Expression: AKT1 ---| TF25501204 10.4238/2014.November.27.22  
 negative Expression: AKT1 ---| TF25667479  
 negative Expression: AKT1 ---| TF25301184 10.1152/ajpgi.00151.2014  
 negative Expression: AKT1 ---| TF21372320 10.1128/MMBR.00031-10  
 negative Expression: AKT1 ---| TF21357737 10.1128/MCB.01321-10  
 negative Expression: AKT1 ---| TF21742795 10.1152/physrev.00024.2010  
 negative Expression: AKT1 ---| TF21791616 10.1128/MCB.05744-11  
 negative Expression: AKT1 ---| TF25738369 10.3892/mmr.2015.3393  
 negative Expression: AKT1 ---| TF25713322 10.1152/ajplung.00334.2014  
 negative Expression: AKT1 ---| TF25932965 10.1371/journal.pone.0125903  
 negative Expression: AKT1 ---| TF25932965 10.1371/journal.pone.0125903  
 negative Expression: AKT1 ---| TP53 10.3727/096504015X14298122915583  
 negative Expression: AKT1 ---| TP53 10.3727/096504015X14298122915583  
 negative Expression: AKT1 ---| TF11923280  
 negative Expression: AKT1 ---| TF19376776 10.1074/jbc.M109.002105  
 negative Expression: AKT1 ---| TF26459696 10.3892/mmr.2015.4381  
 negative Expression: AKT1 ---| TF25482935 10.4161/15384047.2014.961876  
 negative Expression: AKT1 ---| TF26902421 10.1016/j.canlet.2016.02.023  
 negative Expression: AKT1 ---| TP53  
 negative Expression: AKT1 ---| TP53  
 negative Expression: AKT1 ---| TP53 10.1172/JCI80396  
 negative Expression: AKT1 ---| TF26433377 10.1007/s12035-015-9445-2  
 negative Expression: AKT1 ---| TF26433377 10.1007/s12035-015-9445-2  
 negative Expression: AKT1 ---| TF24292837 10.1007/978-3-642-41199-1\_16

negative Expression: AKT1 ---| TP53 10. 2174/1381612822666161006160524  
 negative Expression: AKT1 ---| TF 28107044 10. 1080/01635581. 2017. 1267775  
 negative Expression: AKT1 ---| TF 28484034 10. 1073/pnas. 1702412114  
 negative Expression: AKT1 ---| TF 27837015 10. 1177/0022034516678203  
 negative Expression: AKT1 ---| TF 28635633 10. 3390/i jms18061325  
 negative Expression: AKT1 ---| TF 28635633 10. 3390/i jms18061325  
 negative Expression: AKT1 ---| TF 28691365 10. 1111/accel. 1263910. 1111/accel. 12639  
 negative Expression: AKT1 ---| TF 28401302 10. 1007/s00432-017-2415-5  
 negative Expression: AKT1 ---| TF 28553961 10. 1038/nsmb. 3414  
 negative Expression: AKT1 ---| TF 28938844 10. 1089/ars. 2017. 699010. 1089/ars. 2017. 6990  
 negative Expression: AKT1 ---| TF 29048667 10. 3892/i jo. 2017. 4145  
 negative Expression: AKT1 ---| TF 29048667 10. 3892/i jo. 2017. 4145  
 negative Expression: AKT1 ---| TF 29048640 10. 3892/or. 2017. 6000  
 negative Expression: AKT1 ---| TF 29139175 10. 1002/stem. 274110. 1002/stem. 2741  
 negative Expression: AKT1 ---| TF 28696156 10. 1080/15384047. 2017. 1345397  
 negative Expression: AKT1 ---| TF 28853983 10. 1080/15384047. 2017. 1360446  
 negative Expression: AKT1 ---| TF 29297700 10. 1080/01635581. 2018. 1412486  
 negative Expression: AKT1 ---| TF 29209894 10. 1007/s10863-017-9737-5  
 negative Expression: AKT1 ---| TF 29596872 10. 1016/j. cellsig. 2018. 03. 01310. 1016/j. cellsi  
 negative Expression: AKT1 ---| TF 29436685 10. 3892/or. 2018. 6256  
 negative Expression: AKT1 ---| TF 28938844 10. 1089/ars. 2017. 6990  
 negative Expression: AKT1 ---| TF 28938844 10. 1089/ars. 2017. 6990  
 negative Expression: AKT1 ---| TP53 10. 1161/ATVBAHA. 117. 309378  
 negative Expression: AKT1 ---| TF 28681127 10. 1007/s12011-017-1088-x  
 negative Expression: AKT1 ---| TP53 10. 1096/fj. 201700570RR  
 negative Expression: AKT1 ---| TF 29739064 10. 7754/Clin. Lab. 2018. 171129  
 negative Expression: AKT1 ---| TF 30011966 10. 3390/i jms19072060  
 negative Expression: AKT1 ---| TF 29926229 10. 1007/s00424-018-2162-8  
 negative Expression: AKT1 ---| TF 29926229 10. 1007/s00424-018-2162-8  
 negative Expression: AKT1 ---| TF 29873596 10. 1152/physrev. 00038. 2017  
 negative Expression: AKT1 ---| TF 30208932 10. 1186/s13058-018-1028-5  
 negative Expression: AKT1 ---| TF 30106128 10. 3892/i jmm. 2018. 3825  
 negative Expression: AKT1 ---| TF 30226561 10. 3892/or. 2018. 6703  
 negative Expression: AKT1 ---| TP53 10. 3892/or. 2018. 6759  
 negative Expression: AKT1 ---| TF 30181579 10. 1038/s41401-018-0034-6  
 negative Expression: AKT1 ---| TF 30349992 10. 1007/s00018-018-2949-y  
 negative Expression: AKT1 ---| TF 30132214 10. 1007/s11010-018-3422-9  
 negative Expression: AKT1 ---| TF 30251117 10. 1007/s11010-018-3448-z  
 negative Expression: AKT1 ---| TP53 10. 3892/or. 2019. 7041  
 negative Expression: AKT1 ---| TP53 10. 1186/s12885-019-5475-x  
 negative Expression: AKT1 ---| TP53 10. 1038/s41388-018-0648-7  
 negative Expression: AKT1 ---| TP53 10. 1091/mbc. E18-12-0770  
 negative Expression: AKT1 ---| TF 31592121 10. 15171/apb. 2019. 05610. 15171/apb. 2019. 056  
 negative Expression: AKT1 ---| TP53 10. 12659/MSM. 916461  
 negative Expression: AKT1 ---| TF 32148649 10. 1155/2020/404870610. 1155/2020/4048706  
 negative Expression: AKT1 ---| TP53 10. 1042/BSR20181881  
 negative Expression: AKT1 ---| TP53 10. 1038/s41418-019-0384-8  
 negative Expression: AKT1 ---| TP53 10. 3390/i jms21031060  
 negative Expression: AKT1 ---| TP53 10. 1242/JCS. 230029  
 negative Expression: AKT1 ---| TP53 10. 1080/15476286. 2019. 1705610  
 negative Expression: AKT1 ---| TF 33468664 10. 1073/pnas. 2003193118  
 negative Expression: AKT1 ---| TF 33562110 10. 3390/i jms22041653  
 negative Expression: AKT1 ---| TF 33111210 10. 1007/s11010-020-03951-z  
 negative Expression: AKT1 ---| TF 33542215 10. 1038/s41419-021-03419-y

negative Expression: AKT1 ---| TF 32931807 10.1016/j.jid.2020.08.019  
 negative Expression: AKT1 ---| TF 34065345 10.3390/ijms22105377  
 negative Expression: AKT1 ---| TF 34109989 10.3892/or.2021.8104  
 negative Expression: AKT1 ---| TF 34209135 10.3390/ijms22137064  
 negative Expression: AKT1 ---| TF 34511432 10.18632/aging.203499  
 negative Expression: AKT1 ---| TF 34681745 10.3390/ijms222011088  
 negative Expression: AKT1 ---| TF 34759291 10.1038/s41419-021-04371-7  
 negative Expression: AKT1 ---| TF 34948338 10.3390/ijms222413543  
 negative Expression: AKT1 ---| TF 35216283 10.3390/ijms23042168  
 negative Expression: AKT1 ---| TP53 10.1016/j.gendis.2021.12.025  
 negative Expression: AKT1 ---| TF 35031925 10.1007/s11033-021-07063-9  
 negative Expression: AKT1 ---| TF 35305553 10.1186/s11658-022-00324-w  
 negative Expression: AKT1 ---| TF 35431190 10.3233/TUB-211538  
 negative Expression: AKT1 ---| TF 35414774 10.7150/ijbs.67200  
 negative Expression: AKT1 ---| TF 35414774 10.7150/ijbs.67200  
 negative Expression: AKT1 ---| TF 34328200 10.3892/or.2021.8159  
 negative Expression: AKT1 ---| TP53 10.1016/j.apsb.2022.06.004  
 negative Expression: AKT1 ---| TF 35725771 10.1038/s41375-022-01627-9  
 negative Expression: AKT1 ---| TF 36012464 10.3390/ijms23169196  
 negative Expression: AKT1 ---| TF 35094248 10.1007/s11064-021-03516-6  
 negative Expression: AKT1 ---| TF 35094248 10.1007/s11064-021-03516-6  
 negative Expression: AKT1 ---| TF 36180910 10.1186/s12929-022-00860-9  
 negative Expression: AKT1 ---| TF 36232606 10.3390/ijms231911300  
 negative Expression: AKT1 ---| TF 36221123 10.1186/s12943-022-01664-z  
 negative Expression: AKT1 ---| TF 35792922 10.1080/15384101.2022.2094577  
 negative Expression: AKT1 ---| TF 34951363 10.2174/1566524022666211222161637  
 ProtModification: AKT1 ---> TP53 28359723 10.1016/j.cbi.2017.03.015  
 ProtModification: AKT1 ---> TP53 11054421 10.1074/jbc.M008552200  
 ProtModification: AKT1 ---> TP53 27518560 10.1016/j.cell.2016.07.031  
 ProtModification: AKT1 ---> TP53 15809051 10.1016/j.bbrc.2005.03.044  
 ProtModification: AKT1 ---> TP53 16956580 10.1016/j.bbrc.2006.08.120  
 ProtModification: AKT1 ---> TP53 19147016 10.1016/j.ijrobp.2008.09.036  
 ProtModification: AKT1 ---> TP53 21406225 10.1016/j.cellsig.2011.03.009  
 ProtModification: AKT1 ---> TP53 10.1016/S0959-437X(02)00274-5  
 ProtModification: AKT1 ---> TP53 15574337 10.1016/j.molcel.2004.11.003  
 ProtModification: AKT1 ---> TP53 27208405 10.1016/j.placenta.2016.03.001  
 ProtModification: AKT1 ---> TP53 16452501  
 ProtModification: AKT1 ---> TP53 20200230  
 ProtModification: AKT1 ---> TP53 11960368  
 ProtModification: AKT1 ---> TP53 16982679  
 ProtModification: AKT1 ---> TP53 28696156 10.1080/15384047.2017.1345397  
 ProtModification: AKT1 ---> TP53 29895969 10.1038/s41388-018-0333-x  
 ProtModification: AKT1 ---> TP53 30865562 10.1091/mbc.E18-12-0770  
 ProtModification: AKT1 ---> TP53 21455568 10.3892/ijo.2011.984  
 ProtModification: AKT1 ---> TP53 22316005 10.1089/ars.2012.4529  
 ProtModification: AKT1 ---> TP53 20157733 10.1007/s00432-010-0779-x  
 ProtModification: AKT1 ---> TP53 20820992 10.1007/s00134-010-2023-1  
 ProtModification: AKT1 ---> TP53 21562588 10.1038/cddis.2011.39  
 ProtModification: AKT1 ---> TP53 24285894 10.1523/JNEUROSCI.3293-13.2013  
 ProtModification: AKT1 ---> TP53 26096928 10.1038/onc.2015.228  
 ProtModification: AKT1 ---> TP53 34645107 10.31083/j.jin2003078  
 ProtModification: AKT1 ---> TP53 10.1016/j.bbrc.2005.03.044  
 ProtModification: AKT1 ---> TP53 10.1091/mbc.E18-12-0770  
 ProtModification: AKT1 ---> TP53 10.1523/JNEUROSCI.3293-13.2013

ProtModification: AKT1 ---> TP53 14967490 10.1016/j.virol.2003.11.008  
ProtModification: AKT1 ---> TP53 20036733 10.1016/j.freeradbiomed.2009.12.014  
ProtModification: AKT1 ---> TP53 25942376 10.1080/15384101.2015.1041693  
positive Expression: NOTCH1 --+> 27770236 10.1007/s10565-016-9364-7  
positive Expression: NOTCH1 --+> 27770236 10.1007/s10565-016-9364-7  
positive Expression: NOTCH1 --+> 27770236 10.1007/s10565-016-9364-7  
positive Expression: NOTCH1 --+> 30042932 10.3389/fcimb.2018.0024110.3389/fcimb.2018.00  
positive Expression: NOTCH1 --+> 36266281 10.1038/s41467-022-33739-2  
negative miRNAEffect: MIR107 ---| 28393193 10.3892/or.2017.5546  
negative miRNAEffect: MIR107 ---| 28393193 10.3892/or.2017.5546  
negative miRNAEffect: MIR107 ---| 28393193 10.3892/or.2017.5546  
negative miRNAEffect: MIR107 ---| 30569100 10.3892/or.2018.6936  
negative miRNAEffect: MIR107 ---| 25386925 10.1371/journal.pone.0111860  
negative miRNAEffect: MIR107 ---| 25386925 10.1371/journal.pone.0111860  
negative miRNAEffect: MIR107 ---| 25386925 10.1371/journal.pone.0111860  
negative miRNAEffect: MIR107 ---| 25386925 10.1371/journal.pone.0111860  
negative miRNAEffect: MIR107 ---| 25386925 10.1371/journal.pone.0111860  
negative miRNAEffect: MIR107 ---| 25386925 10.1371/journal.pone.0111860  
negative miRNAEffect: MIR107 ---| 25386925 10.1371/journal.pone.0111860  
negative miRNAEffect: MIR107 ---| 25386925 10.1371/journal.pone.0111860  
negative miRNAEffect: MIR107 ---| MCL1 10.3892/or.2018.6936  
negative miRNAEffect: MIR107 ---| MCL1 10.1615/JEnvironPatholToxicolOncol.2022041924  
positive Regulation: PTGS2 --+> S10844593 10.1046/j.1523-1755.2000.00083.x  
positive Regulation: PTGS2 --+> S10844593 10.1046/j.1523-1755.2000.00083.x  
positive Regulation: PTGS2 --+> S10844593  
positive Regulation: PTGS2 --+> S10844593  
positive Regulation: PTGS2 --+> S10844593  
positive Regulation: PTGS2 --+> S21266034 10.1186/1756-9966-30-13  
positive Regulation: PTGS2 --+> S22355367 10.1371/journal.pone.0031458  
positive Regulation: PTGS2 --+> S22355367 10.1371/journal.pone.0031458  
positive Regulation: PTGS2 --+> S10844593 10.1046/j.1523-1755.2000.00083.x  
positive Regulation: PTGS2 --+> S21266034 10.1186/1756-9966-30-1310.1186/1756-9966-30-1  
positive Regulation: PTGS2 --+> SPP1  
positive Expression: SPP1 --+> P124657887 10.1016/j.matbio.2014.03.001  
positive Expression: SPP1 --+> P112933657  
positive Expression: SPP1 --+> P128505114 10.3390/ijms18051058  
positive Expression: SPP1 --+> P128716167 10.2500/ajra.2017.31.4449  
positive Expression: SPP1 --+> P128769537 10.1155/2017/4049098  
positive Expression: SPP1 --+> P129500465 10.1038/s41419-018-0391-6  
positive Expression: SPP1 --+> P128978514 10.1152/ajpregu.00443.2016  
positive Expression: SPP1 --+> P130307407 10.1172/JCI121266  
positive Expression: SPP1 --+> P133740245 10.1007/978-981-33-6785-2\_6  
positive Expression: SPP1 --+> P123166604 10.1371/journal.pone.0049014  
positive Expression: SPP1 --+> P123166604 10.1371/journal.pone.0049014  
positive Expression: SPP1 --+> P123728342 10.1038/onc.2013.184

positive Expression: SPP1 --> P123728342 10.1038/onc.2013.184  
 positive Expression: SPP1 --> P123728342 10.1038/onc.2013.184  
 positive Expression: SPP1 --> P123728342 10.1038/onc.2013.184  
 positive Expression: SPP1 --> P123728342 10.1038/onc.2013.184  
 positive Expression: SPP1 --> P123728342 10.1038/onc.2013.184  
 positive Expression: SPP1 --> P123728342 10.1038/onc.2013.184  
 positive Expression: SPP1 --> P123728342 10.1038/onc.2013.184  
 positive Expression: SPP1 --> P123728342 10.1038/onc.2013.184  
 positive Expression: SPP1 --> P123728342 10.1038/onc.2013.184  
 positive Expression: SPP1 --> P123728342 10.1038/onc.2013.184  
 positive Expression: SPP1 --> P116818637 10.1158/0008-5472.CAN-06-0661  
 positive Expression: SPP1 --> P116818637 10.1158/0008-5472.CAN-06-0661  
 positive Expression: SPP1 --> P123728342 10.1038/onc.2013.18410.1038/onc.2013.184  
 positive Expression: SPP1 --> P126473949 10.1038/onc.2015.31510.1038/onc.2015.315  
 positive Expression: SPP1 --> P132356572 10.1002/pros.2398610.1002/pros.23986  
 positive Expression: SPP1 --> PTGS2 10.1172/JCI121266  
 positive Expression: SPP1 --> P112933657 10.1210/en.2003-0039  
 positive Expression: SPP1 --> P120459645  
 positive Expression: SPP1 --> PTGS2  
 Regulation: TP53 ---> AKT1 26022125 10.1016/j.bbrc.2015.05.069  
 Regulation: TP53 ---> AKT1 30827507 10.1016/j.bbrc.2019.02.089  
 Regulation: TP53 ---> AKT1 31733192 10.1016/j.bcp.2019.113713  
 Regulation: TP53 ---> AKT1 12393587 10.1182/blood-2002-02-0504  
 Regulation: TP53 ---> AKT1 32687844 10.1016/j.cbi.2020.109196  
 Regulation: TP53 ---> AKT1 31870856 10.1016/j.yexmp.2019.104362  
 Regulation: TP53 ---> AKT1 30528266 10.1016/j.yexcr.2018.12.002  
 Regulation: TP53 ---> AKT1 20685653 10.1074/jbc.M110.134650  
 Regulation: TP53 ---> AKT1 20685653 10.1074/jbc.M110.134650  
 Regulation: TP53 ---> AKT1 29358327 10.1074/jbc.M117.791145  
 Regulation: TP53 ---> AKT1 24451373 10.1074/jbc.M113.532523  
 Regulation: TP53 ---> AKT1 19339243 10.1074/jbc.M809757200  
 Regulation: TP53 ---> AKT1 30473026 10.1016/j.lfs.2018.10.051  
 Regulation: TP53 ---> AKT1 33333052 10.1016/j.lfs.2020.118814  
 Regulation: TP53 ---> AKT1 32693135 10.1016/j.ijbiomac.2020.07.137  
 Regulation: TP53 ---> AKT1 30170033 10.1016/j.dci.2018.08.017  
 Regulation: TP53 ---> AKT1 26875545 10.1016/j.plipres.2016.02.001  
 Regulation: TP53 ---> AKT1 30296496 10.1016/j.bbamcr.2018.10.005  
 Regulation: TP53 ---> AKT1 32738450 10.1016/j.jhep.2020.07.036  
 Regulation: TP53 ---> AKT1 32738450 10.1016/j.jhep.2020.07.036  
 Regulation: TP53 ---> AKT1 27600832 10.1016/j.bbcan.2016.09.001  
 Regulation: TP53 ---> AKT1 31320250 10.1016/j.prp.2019.152531  
 Regulation: TP53 ---> AKT1 33711551 10.1016/j.biopha.2021.111445  
 Regulation: TP53 ---> AKT1 24355212 10.1016/j.freeradbiomed.2013.12.010  
 Regulation: TP53 ---> AKT1 31953216 10.1016/j.bbadis.2020.165684  
 Regulation: TP53 ---> AKT1 28673691 10.1016/j.mod.2017.06.006  
 Regulation: TP53 ---> AKT1 33773191 10.1016/j.phymed.2021.153534



Regulation: TP53 ---> AKT1 31843464 10.1016/j.bmc.2019.115235  
 Regulation: TP53 ---> AKT1 32652464 10.1016/j.jphotobiol.2020.111951  
 Regulation: TP53 ---> AKT1 30641278 10.1016/j.phrs.2019.01.021  
 Regulation: TP53 ---> AKT1 30641278 10.1016/j.phrs.2019.01.021  
 Regulation: TP53 ---> AKT1 33540047 10.1016/j.phrs.2021.105428  
 Regulation: TP53 ---> AKT1 32502598 10.1016/j.semcancer.2020.05.015  
 Regulation: TP53 ---> AKT1 33785447 10.1016/j.semcancer.2021.03.010  
 Regulation: TP53 ---> AKT1 33785447 10.1016/j.semcancer.2021.03.010  
 Regulation: TP53 ---> AKT1 33785447 10.1016/j.semcancer.2021.03.010  
 Regulation: TP53 ---> AKT1 30389549 10.1016/j.biocel.2018.10.008  
 Regulation: TP53 ---> AKT1 31846838 10.1016/j.drup.2019.100670  
 Regulation: TP53 ---> AKT1 32846356 10.1016/j.dnarep.2020.102952  
 Regulation: TP53 ---> AKT1 33717651 10.1016/j.omtn.2021.02.005  
 Regulation: TP53 ---> AKT1 24857662 10.1016/j.celrep.2014.04.046  
 Regulation: TP53 ---> AKT1 24857662 10.1016/j.celrep.2014.04.046  
 Regulation: TP53 ---> AKT1 32670818 10.1016/j.jtcme.2020.02.003  
 Regulation: TP53 ---> AKT1 10.1016/j.gendis.2020.06.001  
 Regulation: TP53 ---> AKT1 15001399 10.1016/j.abb.2004.01.004  
 Regulation: TP53 ---> AKT1 12213580 10.1016/S0006-2952(02)01149-8  
 Regulation: TP53 ---> AKT1 20362557 10.1016/j.bcp.2010.03.031  
 Regulation: TP53 ---> AKT1 22142888 10.1016/j.bcp.2011.11.022  
 Regulation: TP53 ---> AKT1 16648169 10.1529/biophysj.105.077693  
 Regulation: TP53 ---> AKT1 16648169 10.1529/biophysj.105.077693  
 Regulation: TP53 ---> AKT1 20858413 10.1016/j.bpj.2010.07.042  
 Regulation: TP53 ---> AKT1 20858413 10.1016/j.bpj.2010.07.042  
 Regulation: TP53 ---> AKT1 17935714 10.1016/j.yexcr.2007.08.022  
 Regulation: TP53 ---> AKT1 22192357 10.1016/j.febslet.2011.11.034  
 Regulation: TP53 ---> AKT1 15001356 10.1016/j.jmb.2003.10.081  
 Regulation: TP53 ---> AKT1 19203586 10.1016/j.cell.2008.12.002  
 Regulation: TP53 ---> AKT1 19203586 10.1016/j.cell.2008.12.002  
 Regulation: TP53 ---> AKT1 19203586 10.1016/j.cell.2008.12.002  
 Regulation: TP53 ---> AKT1 21377268 10.1016/j.canlet.2011.02.008  
 Regulation: TP53 ---> AKT1 20951769 10.1016/j.bbcan.2010.10.003  
 Regulation: TP53 ---> AKT1 21632182 10.1016/j.mehy.2011.05.006  
 Regulation: TP53 ---> AKT1 15475174 10.1016/j.toxlet.2004.06.013  
 Regulation: TP53 ---> AKT1 18448277 10.1016/j.toxlet.2008.03.012  
 Regulation: TP53 ---> AKT1 19840842 10.1016/j.exger.2009.10.009  
 Regulation: TP53 ---> AKT1 19840842 10.1016/j.exger.2009.10.009  
 Regulation: TP53 ---> AKT1 18534819 10.1016/j.cellsig.2008.04.011  
 Regulation: TP53 ---> AKT1 14624950 10.1016/S0899-9007(03)00174-6  
 Regulation: TP53 ---> AKT1 15862750 10.1016/j.ejca.2005.02.011  
 Regulation: TP53 ---> AKT1 15862750 10.1016/j.ejca.2005.02.011  
 Regulation: TP53 ---> AKT1 15862750 10.1016/j.ejca.2005.02.011  
 Regulation: TP53 ---> AKT1 16084079 10.1016/j.ejca.2005.03.033  
 Regulation: TP53 ---> AKT1 22079189 10.1016/j.tibs.2011.10.002  
 Regulation: TP53 ---> AKT1 15209377 10.1016/j.semcd.2004.01.002  
 Regulation: TP53 ---> AKT1 11545734 10.1016/S1097-2765(01)00323-9  
 Regulation: TP53 ---> AKT1 12742394 10.1016/S1350-9462(03)00035-1  
 Regulation: TP53 ---> AKT1 19520599 10.1016/j.cytogfr.2009.05.007  
 Regulation: TP53 ---> AKT1 34502416 10.3390/ijms22179507  
 Regulation: TP53 ---> AKT1 34502416 10.3390/ijms22179507

Regulation: TP53 ---> AKT1 34445495 10.3390/ijms22168784  
 Regulation: TP53 ---> AKT1 34416907 10.1186/s13046-021-02061-y  
 Regulation: TP53 ---> AKT1 32275841 10.1080/15384101.2020.174979010.1080/15384101  
 Regulation: TP53 ---> AKT1 32275841 10.1080/15384101.2020.174979010.1080/15384101  
 Regulation: TP53 ---> AKT1 32275841 10.1080/15384101.2020.174979010.1080/15384101  
 Regulation: TP53 ---> AKT1 19197146 10.4161/cbt.8.3.7443  
 Regulation: TP53 ---> AKT1 21999842 10.1186/1476-4598-10-12910.1186/1476-4598-10-  
 Regulation: TP53 ---> AKT1 24451373 10.1074/jbc.M113.53252310.1074/jbc.M113.53252  
 Regulation: TP53 ---> AKT1 24469034 10.1038/onc.2013.58510.1038/onc.2013.585  
 Regulation: TP53 ---> AKT1 24488098 10.1038/cdd.2014.210.1038/cdd.2014.2  
 Regulation: TP53 ---> AKT1 24613379 10.1016/j.freeradbiomed.2014.02.02310.1016/j.  
 Regulation: TP53 ---> AKT1 25268131 10.1371/journal.pone.010681210.1371/journal.p  
 Regulation: TP53 ---> AKT1 10.1016/j.bbrc.2019.02.089  
 Regulation: TP53 ---> AKT1 10.1042/BCJ20190888  
 Regulation: TP53 ---> AKT1 10.1016/j.prp.2019.152531  
 Regulation: TP53 ---> AKT1 10.1016/j.bmc.2019.115235  
 Regulation: TP53 ---> AKT1 10.1016/j.jtcme.2020.02.003  
 Regulation: TP53 ---> AKT1 10.1016/j.bpj.2010.07.042  
 Regulation: TP53 ---> AKT1 10.1016/j.bpj.2010.07.042  
 Regulation: TP53 ---> AKT1 10.1016/j.ejca.2005.02.011  
 Regulation: TP53 ---> AKT1 10.1016/j.ejca.2005.02.011  
 Regulation: TP53 ---> AKT1 10.1016/j.ejca.2005.02.011  
 Regulation: TP53 ---> AKT1 10.1016/j.tibs.2011.10.002  
 Regulation: TP53 ---> AKT1 10.1016/j.semcd.2004.01.002  
 Regulation: TP53 ---> AKT1 19648052 10.1016/j.drug.2009.07.001  
 Regulation: TP53 ---> AKT1 19411072 10.1016/j.ccr.2009.03.021  
 Regulation: TP53 ---> AKT1 19796712 10.1016/j.mito.2009.09.006  
 Regulation: TP53 ---> AKT1 22999923 10.1016/j.neulet.2012.09.022  
 Regulation: TP53 ---> AKT1 22975375 10.1016/j.ccr.2012.08.001  
 Regulation: TP53 ---> AKT1 23870914 10.1016/j.foodchem.2013.05.021  
 Regulation: TP53 ---> AKT1 24113167 10.1016/j.bbapap.2013.09.019  
 Regulation: TP53 ---> AKT1 24060999 10.1016/j.jprot.2013.09.009  
 Regulation: TP53 ---> AKT1 24333688 10.1016/j.pharmthera.2013.12.005  
 Regulation: TP53 ---> AKT1 24374014 10.1016/j.canlet.2013.12.025  
 Regulation: TP53 ---> AKT1 10.1016/j.bbamem.2014.10.036  
 Regulation: TP53 ---> AKT1 10.1016/j.bbrc.2014.11.018  
 Regulation: TP53 ---> AKT1 25016051 10.1016/j.ygcen.2014.06.029  
 Regulation: TP53 ---> AKT1 24915467 10.1016/j.mad.2014.06.002  
 Regulation: TP53 ---> AKT1 25907832 10.1016/j.ajpath.2015.01.025  
 Regulation: TP53 ---> AKT1 25446094 10.1016/j.bbrc.2014.11.018  
 Regulation: TP53 ---> AKT1 25939952 10.1016/j.toxlet.2015.04.015  
 Regulation: TP53 ---> AKT1 26066464 10.1016/j.meegid.2015.06.008  
 Regulation: TP53 ---> AKT1 25450343 10.1016/j.bbamem.2014.10.036  
 Regulation: TP53 ---> AKT1 26718407 10.1016/j.bbrc.2015.12.070  
 Regulation: TP53 ---> AKT1 20124728  
 Regulation: TP53 ---> AKT1 15472230  
 Regulation: TP53 ---> AKT1 12639981  
 Regulation: TP53 ---> AKT1 21138557  
 Regulation: TP53 ---> AKT1 18441250  
 Regulation: TP53 ---> AKT1 12529380  
 Regulation: TP53 ---> AKT1 32664542 10.3390/ijms2114490210.3390/ijms21144902  
 Regulation: TP53 ---> AKT1 32922194 10.7150/ijms.4895510.7150/ijms.48955  
 Regulation: TP53 ---> AKT1 33038921 10.1186/s40779-020-00275-310.1186/s40779-020-  
 Regulation: TP53 ---> AKT1 11959846

Regulation: TP53 ---> AKT1 10579725  
 Regulation: TP53 ---> AKT1 10579725  
 Regulation: TP53 ---> AKT1 10. 3727/096504018X15424918479652  
 Regulation: TP53 ---> AKT1 11782444 10. 1101/gad. 942902  
 Regulation: TP53 ---> AKT1 29190376 10. 1093/jmcb/mjx05110. 1093/jmcb/mjx051  
 Regulation: TP53 ---> AKT1 10579725 10. 1083/jcb. 147. 5. 1063  
 Regulation: TP53 ---> AKT1 10579725 10. 1083/jcb. 147. 5. 1063  
 Regulation: TP53 ---> AKT1 19917135  
 Regulation: TP53 ---> AKT1 15792956  
 Regulation: TP53 ---> AKT1 10579725  
 Regulation: TP53 ---> AKT1 10579725  
 Regulation: TP53 ---> AKT1 18445683  
 Regulation: TP53 ---> AKT1 18445683  
 Regulation: TP53 ---> AKT1 18270270  
 Regulation: TP53 ---> AKT1 17921246  
 Regulation: TP53 ---> AKT1 12972501  
 Regulation: TP53 ---> AKT1 12972501  
 Regulation: TP53 ---> AKT1 11368782  
 Regulation: TP53 ---> AKT1 19057511  
 Regulation: TP53 ---> AKT1 10. 1016/j. cytogfr. 2014. 09. 003  
 Regulation: TP53 ---> AKT1 25438737 10. 1016/j. cytogfr. 2014. 09. 003  
 Regulation: TP53 ---> AKT1 22030255 10. 1016/j. canlet. 2011. 09. 040  
 Regulation: TP53 ---> AKT1 15308206 10. 1016/j. tcb. 2004. 07. 006  
 Regulation: TP53 ---> AKT1 23211536 10. 1016/j. canlet. 2012. 11. 042  
 Regulation: TP53 ---> AKT1 24468652 10. 1016/j. semcdb. 2014. 01. 006  
 Regulation: TP53 ---> AKT1 25016051 10. 1016/j. ygcen. 2014. 06. 029  
 Regulation: TP53 ---> AKT1 25016051 10. 1016/j. ygcen. 2014. 06. 029  
 Regulation: TP53 ---> AKT1 24857548 10. 1016/j. molcel. 2014. 04. 024  
 Regulation: TP53 ---> AKT1 24857662 10. 1016/j. celrep. 2014. 04. 046  
 Regulation: TP53 ---> AKT1 19339243  
 Regulation: TP53 ---> AKT1 18356162  
 Regulation: TP53 ---> AKT1 10446202  
 Regulation: TP53 ---> AKT1 15150542  
 Regulation: TP53 ---> AKT1 12719720  
 Regulation: TP53 ---> AKT1 12719720  
 Regulation: TP53 ---> AKT1 12483525  
 Regulation: TP53 ---> AKT1 12149653  
 Regulation: TP53 ---> AKT1 11850850  
 Regulation: TP53 ---> AKT1 11296226  
 Regulation: TP53 ---> AKT1 12446788  
 Regulation: TP53 ---> AKT1 19197384  
 Regulation: TP53 ---> AKT1 22559167 10. 1186/1471-2407-12-166  
 Regulation: TP53 ---> AKT1 22961366 10. 3892/i jo. 2012. 1623  
 Regulation: TP53 ---> AKT1  
 Regulation: TP53 ---> AKT1

Regulation: TP53 ---> AKT1  
 Regulation: TP53 ---> AKT1  
 Regulation: TP53 ---> AKT1  
 Regulation: TP53 ---> AKT1 20685653 10.1074/jbc.M110.134650  
 Regulation: TP53 ---> AKT1 21293193 10.4161/cc.10.4.14864  
 Regulation: TP53 ---> AKT1 21395546 10.2174/156800911795538129  
 Regulation: TP53 ---> AKT1 21743969 10.3892/or.2011.1380  
 Regulation: TP53 ---> AKT1 10.1253/circj.CJ-11-0025  
 Regulation: TP53 ---> AKT1 21138557 10.1186/1476-4598-9-311  
 Regulation: TP53 ---> AKT1 22592924 10.1165/rcmb.2011-03900C  
 Regulation: TP53 ---> AKT1 23733230 10.3892/or.2013.2518  
 Regulation: TP53 ---> AKT1 21487429 10.1038/bjc.2011.84  
 Regulation: TP53 ---> AKT1 20972462 10.1038/onc.2010.486  
 Regulation: TP53 ---> AKT1 21478913 10.1038/onc.2011.117  
 Regulation: TP53 ---> AKT1 22231450 10.1038/onc.2011.576  
 Regulation: TP53 ---> AKT1 23970333 10.3892/ijo.2013.2070  
 Regulation: TP53 ---> AKT1 22076154 10.1371/journal.pone.0027355  
 Regulation: TP53 ---> AKT1 10.1378/chest.11-2746  
 Regulation: TP53 ---> AKT1 10.1378/chest.11-2746  
 Regulation: TP53 ---> AKT1 23028800 10.1371/journal.pone.0045129  
 Regulation: TP53 ---> AKT1 23285096 10.1371/journal.pone.0052572  
 Regulation: TP53 ---> AKT1 24343302 10.1038/ncomms3935  
 Regulation: TP53 ---> AKT1 10.1074/jbc.M113.532523  
 Regulation: TP53 ---> AKT1 10.4161/auto.27286  
 Regulation: TP53 ---> AKT1 24488098 10.1038/cdd.2014.2  
 Regulation: TP53 ---> AKT1 24971482 10.1038/cdd.2014.69  
 Regulation: TP53 ---> AKT1 25268131 10.1371/journal.pone.0106812  
 Regulation: TP53 ---> AKT1 25501339 10.3892/or.2014.3665  
 Regulation: TP53 ---> AKT1 25663065 10.1007/s12032-015-0483-4  
 Regulation: TP53 ---> AKT1 25748921 10.1371/journal.pone.0118926  
 Regulation: TP53 ---> AKT1 24052005 10.1159/000353164  
 Regulation: TP53 ---> AKT1 25692338 10.1080/15384047.2015.1009269  
 Regulation: TP53 ---> AKT1 25692338 10.1080/15384047.2015.1009269  
 Regulation: TP53 ---> AKT1 25607549 10.1089/dna.2014.2745  
 Regulation: TP53 ---> AKT1 25719246 10.1038/cddis.2015.33  
 Regulation: TP53 ---> AKT1 10.1172/JCI80402  
 Regulation: TP53 ---> AKT1 10.1172/JCI82058  
 Regulation: TP53 ---> AKT1 10.1172/JCI82058  
 Regulation: TP53 ---> AKT1  
 Regulation: TP53 ---> AKT1 20220043 10.1177/0091270010362904  
 Regulation: TP53 ---> AKT1 11959846  
 Regulation: TP53 ---> AKT1 15001399  
 Regulation: TP53 ---> AKT1 16061640  
 Regulation: TP53 ---> AKT1 16894566

Regulation: TP53 ---> AKT1 17935714  
 Regulation: TP53 ---> AKT1 21073655 10.1111/j.1742-4658.2010.07911.x  
 Regulation: TP53 ---> AKT1 23194110 10.1111/j.1742-481X.2012.12000.x  
 Regulation: TP53 ---> AKT1 21575475  
 Regulation: TP53 ---> AKT1 25045020 10.1002/cbin.10334  
 Regulation: TP53 ---> AKT1 25501339 10.3892/or.2014.3665  
 Regulation: TP53 ---> AKT1 25623760  
 Regulation: TP53 ---> AKT1 25961455 10.1172/JCI80402  
 Regulation: TP53 ---> AKT1 26181206 10.1038/cddis.2015.191  
 Regulation: TP53 ---> AKT1 26723251 10.1016/j.bbrc.2015.12.096  
 Regulation: TP53 ---> AKT1 26239548 10.3892/mmr.2015.4137  
 Regulation: TP53 ---> AKT1 26790143 10.1016/j.ejca.2015.12.00210.1016/j.ejca.2015  
 Regulation: TP53 ---> AKT1 26496776 10.1007/s10495-015-1188-z  
 Regulation: TP53 ---> AKT1 26181206 10.1038/cddis.2015.191  
 Regulation: TP53 ---> AKT1 27869737 10.3390/ijms17111928  
 Regulation: TP53 ---> AKT1 28229963 10.1007/s12038-017-9667-8  
 Regulation: TP53 ---> AKT1 28322991 10.1016/j.gene.2017.03.01410.1016/j.gene.2017  
 Regulation: TP53 ---> AKT1 28339062 10.3892/ijo.2017.392210.3892/ijo.2017.3922  
 Regulation: TP53 ---> AKT1 10.1530/JME-16-0189  
 Regulation: TP53 ---> AKT1 28339062 10.3892/ijo.2017.3922  
 Regulation: TP53 ---> AKT1 28339062 10.3892/ijo.2017.3922  
 Regulation: TP53 ---> AKT1 28439015 10.1073/pnas.1619832114  
 Regulation: TP53 ---> AKT1 28498433 10.3892/or.2017.5637  
 Regulation: TP53 ---> AKT1 28513299 10.1177/1010428317705330  
 Regulation: TP53 ---> AKT1 28166194 10.1038/onc.2016.518  
 Regulation: TP53 ---> AKT1 28667123 10.1073/pnas.170099611410.1073/pnas.170099611  
 Regulation: TP53 ---> AKT1 28691365 10.1111/accel.1263910.1111/accel.12639  
 Regulation: TP53 ---> AKT1 28667123 10.1073/pnas.1700996114  
 Regulation: TP53 ---> AKT1 28263966 10.1038/onc.2017.14  
 Regulation: TP53 ---> AKT1 27714633 10.1007/s12035-016-0126-6  
 Regulation: TP53 ---> AKT1 27278236 10.1007/s00232-016-9909-y  
 Regulation: TP53 ---> AKT1 28727928 10.1139/cjpp-2017-0149  
 Regulation: TP53 ---> AKT1 28643165 10.1007/s00018-017-2575-0  
 Regulation: TP53 ---> AKT1 29147906 10.1007/978-981-10-6583-5\_8  
 Regulation: TP53 ---> AKT1 29147906 10.1007/978-981-10-6583-5\_8  
 Regulation: TP53 ---> AKT1 28696156 10.1080/15384047.2017.1345397  
 Regulation: TP53 ---> AKT1 28696156 10.1080/15384047.2017.1345397

Regulation: TP53 ---> AKT1 28696156 10.1080/15384047.2017.1345397  
 Regulation: TP53 ---> AKT1 28696156 10.1080/15384047.2017.1345397  
 Regulation: TP53 ---> AKT1 29242354 10.1124/mol.117.110759  
 Regulation: TP53 ---> AKT1 29434218 10.1038/s41419-017-0191-4  
 Regulation: TP53 ---> AKT1 29504895 10.1186/s12864-018-4474-7  
 Regulation: TP53 ---> AKT1 29681985 10.1155/2018/8324696  
 Regulation: TP53 ---> AKT1 29693151 10.3892/or.2018.6380  
 Regulation: TP53 ---> AKT1 29845212 10.3892/i jo.2018.4416  
 Regulation: TP53 ---> AKT1 30431131 10.3892/or.2018.6870  
 Regulation: TP53 ---> AKT1 30576070 10.1002/tox.2268510.1002/tox.22685  
 Regulation: TP53 ---> AKT1 10.1186/s12881-019-0752-8  
 Regulation: TP53 ---> AKT1 30289354 10.1080/15384047.2018.1523858  
 Regulation: TP53 ---> AKT1 30337688 10.1038/s41388-018-0521-8  
 Regulation: TP53 ---> AKT1 10.1097/PP0.00000000000000365  
 Regulation: TP53 ---> AKT1 31126310 10.1186/s12943-019-1030-2  
 Regulation: TP53 ---> AKT1 10.1186/s12935-019-0910-2  
 Regulation: TP53 ---> AKT1 10.1186/s12935-019-0910-2  
 Regulation: TP53 ---> AKT1 32014919 10.21873/anticanres.1400810.21873/anticanres.  
 Regulation: TP53 ---> AKT1 32014919 10.21873/anticanres.1400810.21873/anticanres.  
 Regulation: TP53 ---> AKT1 32161037 10.1523/ENEURO.0438-19.202010.1523/ENEURO.043  
 Regulation: TP53 ---> AKT1 10.1007/s13238-019-0640-1  
 Regulation: TP53 ---> AKT1 31115790 10.1007/s13238-019-0634-z  
 Regulation: TP53 ---> AKT1 10.1038/s41388-019-1022-0  
 Regulation: TP53 ---> AKT1 32242617 10.1042/BCJ2019088810.1042/BCJ20190888  
 Regulation: TP53 ---> AKT1 32274755 10.1007/978-3-030-38266-7\_5  
 Regulation: TP53 ---> AKT1 32223728 10.2174/0929866527666200330172646  
 Regulation: TP53 ---> AKT1 32223728 10.2174/0929866527666200330172646  
 Regulation: TP53 ---> AKT1 32223728 10.2174/0929866527666200330172646  
 Regulation: TP53 ---> AKT1 33184290 10.1038/s41419-020-03185-3  
 Regulation: TP53 ---> AKT1 33184290 10.1038/s41419-020-03185-3  
 Regulation: TP53 ---> AKT1 33446037 10.1080/15384047.2020.1839278  
 Regulation: TP53 ---> AKT1 33688358 10.1155/2021/4652492  
 Regulation: TP53 ---> AKT1 33164579 10.1152/AJPHEART.00304.2020  
 Regulation: TP53 ---> AKT1 33164579 10.1152/AJPHEART.00304.2020  
 Regulation: TP53 ---> AKT1 33238278 10.1159/000511505  
 Regulation: TP53 ---> AKT1 26359920 10.1139/c jpp-2015-0159  
 Regulation: TP53 ---> AKT1 33761957 10.1186/s12929-021-00715-9  
 Regulation: TP53 ---> AKT1 34064134 10.3390/i jms22115445  
 Regulation: TP53 ---> AKT1 33920054 10.3390/molecules26082278  
 Regulation: TP53 ---> AKT1 34205414 10.3390/i jms22126587  
 Regulation: TP53 ---> AKT1 34209215 10.3390/i jms22137059  
 Regulation: TP53 ---> AKT1 34209215 10.3390/i jms22137059  
 Regulation: TP53 ---> AKT1 34209215 10.3390/i jms22137059  
 Regulation: TP53 ---> AKT1 34830349 10.3390/i jms222212466  
 Regulation: TP53 ---> AKT1 34813650 10.1042/BCJ20210077  
 Regulation: TP53 ---> AKT1 34907345 10.1038/s41388-021-02147-z10.1038/s41388-021-  
 Regulation: TP53 ---> AKT1 34907345 10.1038/s41388-021-02147-z10.1038/s41388-021-  
 Regulation: TP53 ---> AKT1 34907345 10.1038/s41388-021-02147-z10.1038/s41388-021-  
 Regulation: TP53 ---> AKT1 34911439 10.1186/s11658-021-00293-6

Regulation: TP53 ---> AKT1 34911439 10.1186/s11658-021-00293-6  
 Regulation: TP53 ---> AKT1 10.3390/molecules27010199  
 Regulation: TP53 ---> AKT1 10.3390/molecules27010199  
 Regulation: TP53 ---> AKT1 10.1016/j.ygyno.2022.01.027  
 positive Expression: CD34 --> BF 22617440 10.4161/auto.20053  
 positive QuantitativeChange: hypc 25268615 10.3390/ijms151017411  
 positive Regulation: NET1 --> TF 29769144 10.1186/s13058-018-0966-2  
 negative QuantitativeChange: hypc 35894468 10.2174/1389203723666220727090317  
 negative QuantitativeChange: hypc 35894468 10.2174/1389203723666220727090317  
 negative Expression: ING4 ---| AF 23969950 10.3892/or.2013.267110.3892/or.2013.2671  
 negative Expression: CYP2J2 ---| 28160853 10.1016/j.phymed.2016.12.001  
 negative Expression: CYP2J2 ---| 31295013 10.1096/fj.201900756R  
 negative Expression: CYP2J2 ---| 31295013 10.1096/fj.201900756R  
 negative Expression: CYP2J2 ---| 31295013 10.1096/fj.201900756R  
 negative Expression: CYP2J2 ---| 31295013 10.1096/fj.201900756R10.1096/fj.201900756R  
 negative Expression: CYP2J2 ---| 31295013 10.1096/fj.201900756R  
 negative Expression: CYP2J2 ---| 31295013 10.1096/fj.201900756R  
 negative Expression: CYP2J2 ---| 31295013 10.1096/fj.201900756R  
 negative Expression: CYP2J2 ---| 31295013 10.1096/fj.201900756R  
 negative Expression: CYP2J2 ---| 31295013 10.1096/fj.201900756R  
 negative Expression: CYP2J2 ---| 31295013 10.1096/fj.201900756R  
 negative Expression: CYP2J2 ---| 35897843 10.3390/ijms23158267  
 positive Regulation: CCL3L1 --> 35437648 10.1007/s11427-021-2097-1  
 Expression: SPP1 ---> TP53 30537505 10.1016/j.ijbiomac.2018.12.075  
 Expression: SPP1 ---> TP53 17785423  
 Expression: SPP1 ---> TP53 29110207 10.1007/s10571-017-0563-4  
 Expression: SPP1 ---> TP53 20676127 10.1038/onc.2010.325  
 Expression: SPP1 ---> TP53 22052905 10.1074/jbc.M111.257519  
 Expression: SPP1 ---> TP53 19016748 10.1111/j.1349-7006.2008.00911.x  
 Expression: SPP1 ---> TP53  
 positive Expression: TP53 --> SF 15501463 10.1016/j.jss.2004.03.028  
 positive Expression: TP53 --> SF 17113338 10.1016/j.cytogfr.2006.09.010  
 positive Expression: TP53 --> SF 32931483 10.1172/JCI137186  
 positive Expression: TP53 --> SF 11807984 10.1002/gcc.10020  
 positive Expression: TP53 --> SF 11807984 10.1002/gcc.10020  
 positive Expression: TP53 --> SF 32638492 10.1111/accel.1318310.1111/accel.13183  
 positive Expression: TP53 --> SF 16567167 10.1016/j.jpedsurg.2005.12.001  
 positive Expression: TP53 --> SF 22405968 10.1016/j.yexcr.2012.02.022  
 positive Expression: TP53 --> SF 20053348 10.1016/j.yexmp.2009.12.008  
 positive Expression: TP53 --> SF 33785447 10.1016/j.semcaner.2021.03.010  
 negative MolTransport: TP53 ---| 19620778  
 negative MolTransport: TP53 ---| 32931483 10.1172/JCI137186  
 negative Regulation: PTEN ---| AF 11991859 10.2741/tsugawa  
 negative Regulation: PTEN ---| AF 10760291 10.1073/pnas.97.8.4233  
 negative Regulation: PTEN ---| AF 15889265 10.1007/s00418-005-0783-4  
 negative Regulation: PTEN ---| AF 20444542 10.1016/j.canlet.2010.04.006  
 negative Regulation: PTEN ---| AF 10748157 10.1074/jbc.M909741199  
 negative Regulation: PTEN ---| AF 19001549 10.1152/ajpendo.90581.2008  
 negative Regulation: PTEN ---| AF 10823906 10.1073/pnas.110149597  
 negative Regulation: PTEN ---| AF 17420249 10.1074/jbc.M608810200  
 negative Regulation: PTEN ---| AF 15379721 10.2174/1568008043339857  
 negative Regulation: PTEN ---| AF 17006756 10.1007/s10549-006-9295-8  
 negative Regulation: PTEN ---| AKT1  
 negative Regulation: PTEN ---| AF 11991859  
 negative Regulation: PTEN ---| AF 10760291

negative Regulation: PTEN ---| AF15379721  
 positive Expression: ABCC1 --> F31571144 10.1007/s12272-019-01183-4  
 negative miRNAEffect: MIR107 ---| 30885433 10.1016/j.bbrc.2019.03.009  
 negative miRNAEffect: MIR107 ---| 33785379 10.1016/j.neulet.2021.135855  
 negative miRNAEffect: MIR107 ---| 33785379 10.1016/j.neulet.2021.135855  
 negative miRNAEffect: MIR107 ---| 29857052 10.1016/j.biocel.2018.05.016  
 negative miRNAEffect: MIR107 ---| 29328395 10.3892/or.2018.6205  
 negative miRNAEffect: MIR107 ---| 30149689 10.3390/ijms19092531  
 negative miRNAEffect: MIR107 ---| 30149689 10.3390/ijms19092531  
 negative miRNAEffect: MIR107 ---| 30149689 10.3390/ijms19092531  
 negative miRNAEffect: MIR107 ---| 30149689 10.3390/ijms19092531  
 negative miRNAEffect: MIR107 ---| 30149689 10.3390/ijms19092531  
 negative miRNAEffect: MIR107 ---| 30149689 10.3390/ijms19092531  
 negative miRNAEffect: MIR107 ---| 30149689 10.3390/ijms19092531  
 negative miRNAEffect: MIR107 ---| 29361817 10.4143/crt.2017.537  
 negative miRNAEffect: MIR107 ---| 29361817 10.4143/crt.2017.537  
 negative miRNAEffect: MIR107 ---| 29361817 10.4143/crt.2017.537  
 negative miRNAEffect: MIR107 ---| 29361817 10.4143/crt.2017.537  
 negative miRNAEffect: MIR107 ---| 29361817 10.4143/crt.2017.537  
 negative miRNAEffect: MIR107 ---| 29361817 10.4143/crt.2017.537  
 negative miRNAEffect: MIR107 ---| 29361817 10.4143/crt.2017.537  
 negative miRNAEffect: MIR107 ---| 29361817 10.4143/crt.2017.537  
 negative miRNAEffect: MIR107 ---| 29361817 10.4143/crt.2017.537  
 negative miRNAEffect: MIR107 ---| 29361817 10.4143/crt.2017.537  
 negative miRNAEffect: MIR107 ---| 30123092 10.1186/s12935-018-0612-1  
 negative miRNAEffect: MIR107 ---| PTEN  
 negative miRNAEffect: MIR107 ---| PTEN  
 negative miRNAEffect: MIR107 ---| PTEN  
 negative miRNAEffect: MIR107 ---| 30777076 10.1186/s12943-019-0958-6  
 negative miRNAEffect: MIR107 ---| 31799671 10.26355/eurrev\_201911\_19568  
 negative miRNAEffect: MIR107 ---| 32246301 10.1007/s10522-020-09876-w  
 negative miRNAEffect: MIR107 ---| 21158707 10.2174/138945011798184155  
 negative miRNAEffect: MIR107 ---| 22408395 10.3390/ijms13021347  
 negative miRNAEffect: MIR107 ---| 29361817 10.4143/crt.2017.537  
 negative miRNAEffect: MIR107 ---| 30575901 10.26355/eurrev\_201812\_1662510.26355/eurrev\_2  
 negative miRNAEffect: MIR107 ---| 31190980 10.2147/CMAR.S19888610.2147/CMAR.S198886  
 negative miRNAEffect: MIR107 ---| 31933853  
 negative miRNAEffect: MIR107 ---| PTEN 10.26355/eurrev\_201911\_19568  
 negative miRNAEffect: MIR107 ---| 29111166 10.1016/j.yexcr.2017.10.033  
 negative miRNAEffect: MIR107 ---| 130 10.1016/j.yexcr.2017.10.033  
 negative miRNAEffect: MIR107 ---| 130 10.1016/j.yexcr.2017.10.033  
 negative miRNAEffect: MIR107 ---| 30149689 10.3390/ijms19092531  
 negative miRNAEffect: MIR107 ---| 30149689 10.3390/ijms19092531  
 negative miRNAEffect: MIR107 ---| 30149689 10.3390/ijms19092531  
 negative miRNAEffect: MIR107 ---| 30149689 10.3390/ijms19092531  
 negative miRNAEffect: MIR107 ---| 34368895 10.1007/s00709-021-01695-1  
 negative miRNAEffect: MIR107 ---| 34368895 10.1007/s00709-021-01695-1  
 negative miRNAEffect: MIR107 ---| 34368895 10.1007/s00709-021-01695-1  
 negative miRNAEffect: MIR107 ---| 35717938 10.1159/00052547610.1159/000525476  
 Expression: PTEN ---> ABCC1 18702307  
 positive PromoterBinding: TP53 -- 18234542 10.1016/j.oraloncology.2007.10.006  
 positive PromoterBinding: TP53 -- 10196169 10.1074/jbc.274.16.10911  
 positive PromoterBinding: TP53 -- 16865247  
 positive PromoterBinding: TP53 -- 17043422 10.3346/jkms.2006.21.5.871  
 positive PromoterBinding: TP53 -- 15608668 10.1038/sj.onc.1208353  
 positive PromoterBinding: TP53 -- 16682957 10.1038/sj.onc.1209579



positive PromoterBinding: TP53 -- 17594159 10.3349/ymj.2007.48.3.495  
 positive PromoterBinding: TP53 -- 17929263 10.1002/jso.20907  
 positive PromoterBinding: TP53 -- 15921850 10.1016/j.canlet.2005.03.023  
 positive PromoterBinding: TP53 -- 19148357 10.1590/s0004-28032008000400007  
 positive PromoterBinding: TP53 -- 16515599 10.1111/j.1525-1438.2006.00477.x  
 positive PromoterBinding: TP53 --> PTGS2  
 positive PromoterBinding: TP53 -- 10196169  
 positive PromoterBinding: TP53 -- 16865247  
 positive PromoterBinding: TP53 -- 17043422 10.3346/jkms.2006.21.5.871  
 positive PromoterBinding: TP53 -- 15608668 10.1038/sj.onc.1208353  
 positive PromoterBinding: TP53 -- 16682957 10.1038/sj.onc.1209579  
 positive PromoterBinding: TP53 -- 17594159 10.3349/ymj.2007.48.3.495  
 positive PromoterBinding: TP53 -- 17929263 10.1002/jso.20907  
 positive PromoterBinding: TP53 -- 15921850 10.1016/j.canlet.2005.03.023  
 positive PromoterBinding: TP53 -- 19148357  
 positive PromoterBinding: TP53 -- 16515599 10.1111/j.1525-1438.2006.00477.x  
 positive Expression: FCN3 --> TP53 10.7150/ijbs.69784  
 Binding: SH3GL3 ---- RAC1 17341688  
 Expression: TP53 ----> SPP1 15501463 10.1016/j.jss.2004.03.028  
 Expression: TP53 ----> SPP1 32638492 10.1111/accel.1318310.1111/accel.13183  
 Expression: TP53 ----> SPP1 17113338 10.1016/j.cytogfr.2006.09.010  
 Expression: TP53 ----> SPP1 11807984 10.1002/gcc.10020  
 Expression: TP53 ----> SPP1 11807984 10.1002/gcc.10020  
 Expression: TP53 ----> SPP1 16567167 10.1016/j.jpedsurg.2005.12.001  
 Expression: TP53 ----> SPP1 22405968 10.1016/j.yexcr.2012.02.022  
 Expression: TP53 ----> SPP1 20053348 10.1016/j.yexmp.2009.12.008  
 Expression: TP53 ----> SPP1 22099172 10.1016/j.diff.2011.08.008  
 Expression: TP53 ----> SPP1 22099172 10.1016/j.diff.2011.08.008  
 Expression: TP53 ----> SPP1  
 Expression: TP53 ----> SPP1 10.1172/JCI137186  
 Expression: TP53 ----> SPP1 33785447 10.1016/j.semcaner.2021.03.010  
 Expression: GADD45G ----> TP53 10597261  
 Expression: GADD45G ----> TP53 10597261  
 negative Regulation: PTGS2 ---| 133741331 10.1016/j.bcp.2021.114523  
 negative Regulation: PTGS2 ---| 133741331 10.1016/j.bcp.2021.114523  
 negative Regulation: PTGS2 ---| 120558725 10.1074/jbc.M110.135251  
 negative Regulation: PTGS2 ---| 120236942 10.1074/jbc.M109.078576  
 negative Regulation: PTGS2 ---| 120236942 10.1074/jbc.M109.078576  
 negative Regulation: PTGS2 ---| 120236942 10.1074/jbc.M109.078576  
 negative Regulation: PTGS2 ---| 115550400 10.1074/jbc.M406577200  
 negative Regulation: PTGS2 ---| 115550400 10.1074/jbc.M406577200  
 negative Regulation: PTGS2 ---| 115550400 10.1074/jbc.M406577200  
 negative Regulation: PTGS2 ---| 115550400 10.1074/jbc.M406577200  
 negative Regulation: PTGS2 ---| 115550400 10.1074/jbc.M406577200  
 negative Regulation: PTGS2 ---| 115550400 10.1074/jbc.M406577200  
 negative Regulation: PTGS2 ---| 115550400 10.1074/jbc.M406577200  
 negative Regulation: PTGS2 ---| 115550400 10.1074/jbc.M406577200  
 negative Regulation: PTGS2 ---| 115550400 10.1074/jbc.M406577200  
 negative Regulation: PTGS2 ---| 115550400 10.1074/jbc.M406577200  
 negative Regulation: PTGS2 ---| 133794285 10.1016/j.jtbi.2021.110696  
 negative Regulation: PTGS2 ---| 129959028 10.1016/j.lfs.2018.06.028  
 negative Regulation: PTGS2 ---| 133551224 10.1016/j.arcmed.2021.01.005  
 negative Regulation: PTGS2 ---| 129242151 10.1016/j.fct.2017.12.011  
 negative Regulation: PTGS2 ---| 129242151 10.1016/j.fct.2017.12.011  
 negative Regulation: PTGS2 ---| 129242151 10.1016/j.fct.2017.12.011



negative Regulation: PTGS2 ---| 119706164  
 negative Regulation: PTGS2 ---| 115550400  
 negative Regulation: PTGS2 ---| 115550400  
 negative Regulation: PTGS2 ---| 115550400  
 negative Regulation: PTGS2 ---| 115550400  
 negative Regulation: PTGS2 ---| 115550400  
 negative Regulation: PTGS2 ---| 115550400  
 negative Regulation: PTGS2 ---| 115550400  
 negative Regulation: PTGS2 ---| 115550400  
 negative Regulation: PTGS2 ---| 115550400  
 negative Regulation: PTGS2 ---| 111756433  
 negative Regulation: PTGS2 ---| 116800815  
 negative Regulation: PTGS2 ---| 111756671  
 negative Regulation: PTGS2 ---| 111756671  
 negative Regulation: PTGS2 ---| 118356920  
 negative Regulation: PTGS2 ---| 112411481  
 negative Regulation: PTGS2 ---| 121209926  
 negative Regulation: PTGS2 ---| 128346420 10.1038/onc.2017.73  
 negative Regulation: PTGS2 ---| TP53 10.1530/ERC-17-0450  
 negative Regulation: PTGS2 ---| TP53 10.1530/ERC-17-0376  
 negative Regulation: PTGS2 ---| 120558725 10.1074/jbc.M110.135251  
 negative Regulation: PTGS2 ---| 124792472 10.1016/j.jphotobiol.2014.03.015  
 negative Regulation: PTGS2 ---| 121254973 10.2174/092986711794940833  
 negative Regulation: PTGS2 ---| 126212257 10.1016/j.biocel.2015.07.009  
 negative Regulation: PTGS2 ---| 115550400  
 negative Regulation: PTGS2 ---| 123328527 10.1164/rccm.201208-13610C  
 negative Regulation: PTGS2 ---| 116650963 10.1016/j.ejso.2006.02.024  
 negative Regulation: PTGS2 ---| 121340650 10.1007/s00011-011-0316-7  
 negative Regulation: PTGS2 ---| 121765464 10.1038/onc.2011.234  
 negative Regulation: PTGS2 ---| 121765464 10.1038/onc.2011.234  
 negative Regulation: PTGS2 ---| 121765464 10.1038/onc.2011.234  
 negative Regulation: PTGS2 ---| 121765464 10.1038/onc.2011.234  
 negative Regulation: PTGS2 ---| 121209926 10.1371/journal.pone.0015174  
 negative Regulation: PTGS2 ---| 124926985 10.1371/journal.pone.0099743  
 negative Regulation: PTGS2 ---| 123907425 10.1515/hsz-2012-0355  
 negative Regulation: PTGS2 ---| 123907425 10.1515/hsz-2012-0355  
 negative Regulation: PTGS2 ---| 111756433  
 negative Regulation: PTGS2 ---| 114500353  
 negative Regulation: PTGS2 ---| 115698513  
 negative Regulation: PTGS2 ---| 115707991  
 negative Regulation: PTGS2 ---| 115707991  
 negative Regulation: PTGS2 ---| 115608668  
 negative Regulation: PTGS2 ---| 117582597  
 negative Regulation: PTGS2 ---| 119346994 10.1097/MPA.0b013e31819fef8b  
 negative Regulation: PTGS2 ---| 119465063 10.1016/j.bbamcr.2009.05.006  
 negative Regulation: PTGS2 ---| 119465063 10.1016/j.bbamcr.2009.05.006  
 negative Regulation: PTGS2 ---| 119465063 10.1016/j.bbamcr.2009.05.006  
 negative Regulation: PTGS2 ---| 119465063 10.1016/j.bbamcr.2009.05.006  
 negative Regulation: PTGS2 ---| 120236942 10.1074/jbc.M109.078576  
 negative Regulation: PTGS2 ---| 121668942 10.1186/1471-2407-11-238  
 negative Regulation: PTGS2 ---| 124792472 10.1016/j.jphotobiol.2014.03.015  
 negative Regulation: PTGS2 ---| TP53 10.1074/mcp.M115.053926  
 negative Regulation: PTGS2 ---| 127633132 10.3892/or.2016.5089

negative Regulation: PTGS2 ---| TP53  
negative Regulation: PTGS2 ---| 129242151 10.1016/j.fct.2017.12.01110.1016/j.fct.2017.1  
negative Regulation: PTGS2 ---| 129883595 10.1016/j.bbcan.2018.06.001  
negative Regulation: PTGS2 ---| 128960214 10.1038/emm.2017.144  
negative Regulation: PTGS2 ---| TP53 10.1016/j.arcmed.2021.01.005  
negative Regulation: PTGS2 ---| 134711017 10.31557/APJCP.2021.22.10.3393  
negative Regulation: PTGS2 ---| 134711017 10.31557/APJCP.2021.22.10.3393  
Regulation: TP53 ---> GADD45G 15644399  
Regulation: TP53 ---> GADD45G 15644399 10.1210/jc.2004-1848  
Regulation: TP53 ---> GADD45G 30072642 10.3390/ijms19082269  
Regulation: TP53 ---> GADD45G 30072642 10.3390/ijms19082269  
Regulation: TP53 ---> GADD45G 34326251 10.1073/pnas.2025539118  
Regulation: TP53 ---> GADD45G 35099007 10.1242/DMM.049327  
Expression: SPP1 ---> CD274 28830685 10.1016/j.yexcr.2017.08.028  
Expression: SPP1 ---> CD274 28830685 10.1016/j.yexcr.2017.08.028  
Expression: SPP1 ---> CD274 28830685 10.1016/j.yexcr.2017.08.028  
Expression: SPP1 ---> CD274 28830685 10.1016/j.yexcr.2017.08.02810.1016/j.yexcr.20  
Expression: SPP1 ---> CD274 28830685 10.1016/j.yexcr.2017.08.028  
Expression: SPP1 ---> CD274 28830685 10.1016/j.yexcr.2017.08.028  
Expression: SPP1 ---> CD274 30206757 10.1007/s10620-018-5282-2  
positive Expression: MAPK1 ---> (23274518 10.1016/j.taap.2012.12.014  
positive Expression: MAPK1 ---> (19749156  
positive Expression: MAPK1 ---> (19749156  
positive Expression: MAPK1 ---> (21266576 10.1074/jbc.M110.172247  
positive Expression: MAPK1 ---> (22430216 10.1038/onc.2012.97  
positive Expression: MAPK1 ---> (22430216 10.1038/onc.2012.97  
positive Expression: MAPK1 ---> (21266576 10.1074/jbc.M110.17224710.1074/jbc.M110.17224  
positive Expression: MAPK1 ---> (22430216 10.1038/onc.2012.9710.1038/onc.2012.97  
positive Expression: MAPK1 ---> (23947803 10.1186/bcr3458  
positive Expression: MAPK1 ---> (23947803 10.1186/bcr3458  
positive Expression: MAPK1 ---> (25805831 10.1096/fj.14-265603  
positive Regulation: GPER1 ---> N29996493 10.3390/ijms19072011  
positive Regulation: GPER1 ---> N30576226 10.1139/cjpp-2018-0544  
positive Regulation: GPER1 ---> N33237585 10.1111/jcmm.1599710.1111/jcmm.15997  
positive Regulation: GPER1 ---> N24275097 10.1016/j.biocel.2013.11.011  
positive Regulation: GPER1 ---> N24275097 10.1016/j.biocel.2013.11.011  
positive Regulation: GPER1 ---> N27548161 10.3390/ijms17081357  
positive Regulation: GPER1 ---> N25423896 10.1038/nrn3856  
positive Regulation: GPER1 ---> N29996493 10.3390/ijms19072011  
positive Regulation: GPER1 ---> N35216398 10.3390/ijms23042284  
positive Expression: NOTCH1 ---> 25670080 10.1016/j.ccell.2014.11.013  
positive Expression: NOTCH1 ---> 23342113 10.1371/journal.pone.0054262  
positive Expression: NOTCH1 ---> 23342113 10.1371/journal.pone.0054262  
positive Expression: NOTCH1 ---> 23342113 10.1371/journal.pone.0054262  
positive Expression: NOTCH1 ---> AKT1 10.1128/MCB.01074-15  
positive Expression: NOTCH1 ---> AKT1 10.1071/RD14212  
positive Expression: NOTCH1 ---> 18440314 10.1016/j.febslet.2008.04.024  
positive Expression: NOTCH1 ---> 23342113 10.1371/journal.pone.0054262  
positive Expression: NOTCH1 ---> 23196196 10.1016/j.bbagen.2012.11.008  
positive Expression: NOTCH1 ---> 25380967 10.1186/1476-4598-13-247

positive Expression: NOTCH1 --> 19771395 10.1007/s11060-009-0007-1  
 positive Expression: NOTCH1 --> AKT1 10.1128/MCB.01074-15  
 positive Expression: NOTCH1 --> AKT1 10.1530/REP-16-0689  
 positive Expression: NOTCH1 --> 28286920 10.1007/s12026-017-8913-3  
 Expression: TP53 --> CD274 32522567 10.1016/j.lfs.2020.117923  
 Expression: TP53 --> CD274 33753114 10.1016/j.lfs.2021.119359  
 Expression: TP53 --> CD274 33159965 10.1016/j.humpath.2020.10.014  
 Expression: TP53 --> CD274 29572005 10.1016/j.lungcan.2018.02.005  
 Expression: TP53 --> CD274 31097096 10.1016/j.lungcan.2019.04.005  
 Expression: TP53 --> CD274 31097096 10.1016/j.lungcan.2019.04.005  
 Expression: TP53 --> CD274 26947605 10.1016/j.eururo.2016.02.048  
 Expression: TP53 --> CD274 33993033 10.1016/j.ctrv.2021.102219  
 Expression: TP53 --> CD274 32057515 10.1016/j.prp.2020.152852  
 Expression: TP53 --> CD274 10.1093/annonc/mdx711.018  
 Expression: TP53 --> CD274 27687306 10.1093/annonc/mdw436  
 Expression: TP53 --> CD274 31046082 10.1093/annonc/mdz135  
 Expression: TP53 --> CD274 33798656 10.1016/j.annonc.2021.03.203  
 Expression: TP53 --> CD274 31005030 10.1016/j.drup.2019.04.001  
 Expression: TP53 --> CD274 32846356 10.1016/j.dnarep.2020.102952  
 Expression: TP53 --> CD274 31495715 10.1016/j.oooo.2019.07.008  
 Expression: TP53 --> CD274 28741502 10.1016/j.trecan.2016.09.007  
 Expression: TP53 --> CD274 33199193 10.1016/j.trecan.2020.10.005  
 Expression: TP53 --> CD274 33199193 10.1016/j.trecan.2020.10.005  
 Expression: TP53 --> CD274 10.1016/j.asjsur.2021.06.030  
 Expression: TP53 --> CD274 27499357 10.3892/ijo.2016.3632  
 Expression: TP53 --> CD274 29855617 10.1038/s41388-018-0347-4  
 Expression: TP53 --> CD274 30264678 10.2174/1389203719666180928105632  
 Expression: TP53 --> CD274 31399545 10.1073/pnas.1901765116  
 Expression: TP53 --> CD274 31506076 10.1186/s13046-019-1403-9  
 Expression: TP53 --> CD274 31726940 10.1080/15384101.2019.1688951  
 Expression: TP53 --> CD274 32060814 10.1007/s10620-020-06126-4  
 Expression: TP53 --> CD274 32929059 10.1038/s41419-020-02940-w  
 Expression: TP53 --> CD274 32929059 10.1038/s41419-020-02940-w  
 Expression: TP53 --> CD274 32992658 10.3390/ijms21197139  
 Expression: TP53 --> CD274 33116132 10.1038/s41467-020-19288-6  
 Expression: TP53 --> CD274 10.5483/BMBRep.2021.54.1.241  
 Expression: TP53 --> CD274 34088360 10.1186/s13046-021-01987-7  
 Expression: TP53 --> CD274 29707124 10.18632/oncotarget.2477010.18632/oncotarget.  
 Expression: TP53 --> CD274 30915036 10.3389/fendo.2019.0015210.3389/fendo.2019.00  
 Expression: TP53 --> CD274 31506076 10.1186/s13046-019-1403-910.1186/s13046-019-1  
 Expression: TP53 --> CD274 31506076 10.1186/s13046-019-1403-910.1186/s13046-019-1  
 Expression: TP53 --> CD274 32545367 10.3390/cancers1206153510.3390/cancers1206153  
 Expression: TP53 --> CD274 33731702 10.1038/s41419-021-03556-410.1038/s41419-021-  
 Expression: TP53 --> CD274 10.3390/ijms22189843  
 Expression: TP53 --> CD274 1287 10.1016/j.trecan.2016.09.007  
 Expression: TP53 --> CD274 10.1016/j.prp.2020.152852  
 Expression: TP53 --> CD274 10.1073/pnas.1901765116  
 Expression: TP53 --> CD274 10.1186/s13046-019-1403-9

Expression: TP53 ---> CD274 10.1186/s13046-019-1403-9  
 Expression: TP53 ---> CD274 10.1186/s13046-019-1403-9  
 Expression: TP53 ---> CD274 10.1186/s13046-019-1403-9  
 Expression: TP53 ---> CD274 10.1186/s13046-019-1403-9  
 Expression: TP53 ---> CD274 10.1186/s13046-019-1403-9  
 Expression: TP53 ---> CD274 10.1186/s13046-019-1403-9  
 Expression: TP53 ---> CD274 10.1080/15384101.2019.1688951  
 Expression: TP53 ---> CD274 29707344 10.21037/jtd.2018.03.1410.21037/jtd.2018.03.1  
 Expression: TP53 ---> CD274 27687306 10.1093/annonc/mdw436  
 Expression: TP53 ---> CD274 27281199 10.1038/nature18294  
 Expression: TP53 ---> CD274 404 10.1016/j.eururo.2016.02.048  
 Expression: TP53 ---> CD274 27793883 10.21873/anticanres.11145  
 Expression: TP53 ---> CD274 28714919 10.3390/ijms18071542  
 Expression: TP53 ---> CD274 29970498 10.21873/anticanres.12662  
 Expression: TP53 ---> CD274 35090497 10.1186/s12964-021-00816-w  
 Expression: TP53 ---> CD274 35373730 10.1017/erm.2022.9  
 Expression: TP53 ---> CD274 35373730 10.1017/erm.2022.9  
 Expression: TP53 ---> CD274 35373730 10.1017/erm.2022.9  
 Expression: TP53 ---> CD274 35414774 10.7150/ijbs.67200  
 Expression: TP53 ---> CD274 10.1016/j.semcaner.2022.05.012  
 Expression: TP53 ---> CD274 35905642 10.1016/j.tranon.2022.101493  
 Expression: TP53 ---> CD274 36104100 10.1136/jitc-2022-005068  
 Expression: TP53 ---> CD274 36233088 10.3390/ijms231911789  
 Expression: TP53 ---> CD274 36361836 10.3390/ijms232113055  
 negative Expression: PPARG ---| (22895549 10.3892/mmr.2012.1034  
 negative Expression: PPARG ---| (22895549 10.3892/mmr.2012.1034  
 negative Expression: PPARG ---| (22895549 10.3892/mmr.2012.1034  
 positive QuantitativeChange: hypc 31620898 10.1007/s00432-019-03047-210.1007/s00432-019-  
 negative Regulation: KDM5B ---| 124778210 10.1073/pnas.1324036111  
 negative Regulation: KDM5B ---| 124778210 10.1073/pnas.1324036111  
 negative Regulation: KDM5B ---| TP53  
 Expression: NOTCH1 ---> NGF 26491050 10.1152/ajpccell.00163.2015  
 Expression: NOTCH1 ---> NGF 25817714 10.1016/j.visres.2015.01.030  
 positive Regulation: BECN1 --> c28242349 10.1016/j.bbcan.2017.02.004  
 positive Regulation: BECN1 --> c28479384 10.1016/j.gene.2017.05.006  
 positive Regulation: BECN1 --> c20207475 10.1016/j.canlet.2010.02.001  
 positive Regulation: BECN1 --> c22771248 10.1016/j.amjoto.2012.05.005  
 positive Regulation: BECN1 --> c23722017 10.1016/j.prp.2013.04.006  
 positive Regulation: BECN1 --> c25523227 10.1016/j.prp.2014.11.010  
 positive Regulation: BECN1 --> c27003389 10.1007/s10495-016-1237-2  
 positive Regulation: BECN1 --> c29207161 10.3892/or.2017.6115  
 positive Regulation: BECN1 --> c29322787 10.4149/neo\_2018\_161102N528  
 positive Regulation: BECN1 --> c32251287 10.1038/s41419-020-2390-7  
 positive Regulation: BECN1 --> c21350938 10.1007/s10059-011-0034-6  
 positive Regulation: BECN1 --> c22805532 10.1097/IGC.0b013e31825e0caa  
 positive Regulation: BECN1 --> c22665050 10.1038/onc.2012.176  
 positive Regulation: BECN1 --> c26700674 10.1007/s13277-015-4693-3  
 positive Regulation: BECN1 --> c20207475 10.1016/j.canlet.2010.02.00110.1016/j.canlet.  
 positive Regulation: BECN1 --> c22665050 10.1038/onc.2012.17610.1038/onc.2012.176  
 positive Regulation: BECN1 --> c23225331 10.1007/s13277-012-0599-510.1007/s13277-012-0  
 positive Regulation: BECN1 --> c27313746 10.3892/o1.2016.4542  
 positive Regulation: BECN1 --> c31274516 10.1097/CAD.000000000000080410.1097/CAD.00000  
 positive Regulation: BECN1 --> c31966694  
 positive Regulation: BECN1 --> c31966694



GeneticChange: hypopharyngeal sq 16477330 10.1016/S0929-6646(09)60330-2  
GeneticChange: hypopharyngeal sq 29282038 10.1186/s12885-017-3913-110.1186/s12885-017-3  
GeneticChange: hypopharyngeal sq 29282038 10.1186/s12885-017-3913-110.1186/s12885-017-3  
GeneticChange: hypopharyngeal sq 29282038 10.1186/s12885-017-3913-110.1186/s12885-017-3  
GeneticChange: hypopharyngeal sq 34775496 10.1038/s41419-021-04367-3  
GeneticChange: hypopharyngeal sq 35849264 10.1007/s10495-022-01750-z  
negative Regulation: GPER1 ---| (34098945 10.1186/s12935-021-02003-w  
positive Expression: MAPK1 --> (29666117 10.1182/blood-2017-11-764357  
positive Expression: MAPK1 --> CD274 10.1016/j.juro.2018.02.1848  
positive Expression: MAPK1 --> (32822718 10.1016/j.lfs.2020.118297  
positive Expression: MAPK1 --> (29428449 10.1016/j.leukres.2018.01.014  
positive Expression: MAPK1 --> (30851544 10.1016/j.leukres.2019.02.010  
positive Expression: MAPK1 --> (28720430 10.1016/j.pharmthera.2017.07.004  
positive Expression: MAPK1 --> (32947221 10.1016/j.lungcan.2020.09.005  
positive Expression: MAPK1 --> (31336132 10.1016/j.fct.2019.110693  
positive Expression: MAPK1 --> (31336132 10.1016/j.fct.2019.110693  
positive Expression: MAPK1 --> (31883986 10.1016/j.fct.2019.111092  
positive Expression: MAPK1 --> (31883986 10.1016/j.fct.2019.111092  
positive Expression: MAPK1 --> (33675984 10.1016/j.canlet.2021.02.023  
positive Expression: MAPK1 --> (33220359 10.1016/j.jep.2020.113598  
positive Expression: MAPK1 --> CD274 10.1093/annonc/mdv528.08  
positive Expression: MAPK1 --> CD274 10.1093/annonc/mdw521.048  
positive Expression: MAPK1 --> (32177601 10.1093/annonc/mdy315.001  
positive Expression: MAPK1 --> (33310309 10.1016/j.phymed.2020.153425  
positive Expression: MAPK1 --> (30287140 10.1016/j.tibs.2018.09.004  
positive Expression: MAPK1 --> (32294525 10.1016/j.phrs.2020.104806  
positive Expression: MAPK1 --> (29246442 10.1016/j.immuni.2017.11.016  
positive Expression: MAPK1 --> (29562194 10.1016/j.immuni.2018.03.014  
positive Expression: MAPK1 --> (27258185 10.1016/j.intimp.2016.05.016  
positive Expression: MAPK1 --> (31780372 10.1016/j.intimp.2019.106006  
positive Expression: MAPK1 --> (30172884 10.1016/j.tranon.2018.08.005  
positive Expression: MAPK1 --> CD274 10.1016/j.apsb.2021.03.008  
positive Expression: MAPK1 --> CD274 10.1016/j.apsb.2021.03.010  
positive Expression: MAPK1 --> (33171331 10.1016/j.redox.2020.101780  
positive Expression: MAPK1 --> (16085391 10.1016/j.jdermsci.2005.06.008  
positive Expression: MAPK1 --> (20971039 10.1016/j.molmed.2010.09.006  
positive Expression: MAPK1 --> (25500094 10.1016/j.oraloncology.2014.11.014  
positive Expression: MAPK1 --> (26707383 10.1016/j.cllc.2015.11.006  
positive Expression: MAPK1 --> (26707383 10.1016/j.cllc.2015.11.006  
positive Expression: MAPK1 --> CD274 10.1016/S1556-0864(16)30012-0  
positive Expression: MAPK1 --> CD274 10.1016/S1556-0864(16)30012-0  
positive Expression: MAPK1 --> (27617403 10.1038/labinvest.2016.96  
positive Expression: MAPK1 --> (28344319 10.1038/leu.2017.103  
positive Expression: MAPK1 --> (28451792 10.1007/s00262-017-2005-z  
positive Expression: MAPK1 --> (28451792 10.1007/s00262-017-2005-z  
positive Expression: MAPK1 --> (29765155 10.1038/s41388-018-0303-3  
positive Expression: MAPK1 --> (31382969 10.1186/s12964-019-0391-x  
positive Expression: MAPK1 --> (31382969 10.1186/s12964-019-0391-x  
positive Expression: MAPK1 --> (31113825 10.1136/jclinpath-2019-205818  
positive Expression: MAPK1 --> (31657787 10.1172/JCI132534  
positive Expression: MAPK1 --> (31503548 10.1172/JCI127721



positive Expression: MAPK1 --> (31503548 10.1172/JCI127721  
positive Expression: MAPK1 --> (32194893  
positive Expression: MAPK1 --> (31748880 10.1007/s12253-019-00735-9  
positive Expression: MAPK1 --> (32963532 10.1155/2020/7314195  
positive Expression: MAPK1 --> (34088360 10.1186/s13046-021-01987-7  
positive Expression: MAPK1 --> (34167551 10.1186/s13046-021-01972-0  
positive Expression: MAPK1 --> (34167551 10.1186/s13046-021-01972-0  
positive Expression: MAPK1 --> (34167551 10.1186/s13046-021-01972-0  
positive Expression: MAPK1 --> (34319029 10.31557/APJCP.2021.22.7.2069  
positive Expression: MAPK1 --> (22695874 10.1007/s00262-012-1293-6  
positive Expression: MAPK1 --> (23785454 10.1371/journal.pone.0065821  
positive Expression: MAPK1 --> (24551119 10.1371/journal.pone.0088557  
positive Expression: MAPK1 --> (24606459 10.7314/APJCP.2014.15.3.1321  
positive Expression: MAPK1 --> (24606459 10.7314/APJCP.2014.15.3.1321  
positive Expression: MAPK1 --> (24606459 10.7314/APJCP.2014.15.3.1321  
positive Expression: MAPK1 --> (25889536 10.1186/s12964-015-0093-y  
positive Expression: MAPK1 --> (25889536 10.1186/s12964-015-0093-y  
positive Expression: MAPK1 --> (17363736 10.1182/blood-2006-10-051482  
positive Expression: MAPK1 --> (19703193 10.1111/j.1349-7006.2009.01302.x10.1111/j.134  
positive Expression: MAPK1 --> (19830728 10.1002/eji.20093928910.1002/eji.200939289  
positive Expression: MAPK1 --> (24606459 10.7314/apjcp.2014.15.3.1321  
positive Expression: MAPK1 --> (26019170 10.1158/1078-0432.CCR-15-001610.1158/1078-043  
positive Expression: MAPK1 --> (28218497 10.1002/1878-0261.1203210.1002/1878-0261.1203  
positive Expression: MAPK1 --> (31406255 10.1038/s41388-019-0919-y10.1038/s41388-019-0  
positive Expression: MAPK1 --> (31798578 10.3389/fimmu.2019.0262710.3389/fimmu.2019.02  
positive Expression: MAPK1 --> (32134157 10.1002/mc.2317610.1002/mc.23176  
positive Expression: MAPK1 --> (32194893  
positive Expression: MAPK1 --> (32194893  
positive Expression: MAPK1 --> (34185141 10.1007/s00432-021-03694-4  
positive Expression: MAPK1 --> (34202040 10.3390/medsci903004810.3390/medsci9030048  
positive Expression: MAPK1 --> (34349003 10.1158/1535-7163.MCT-20-111210.1158/1535-716  
positive Expression: MAPK1 --> (34349003 10.1158/1535-7163.MCT-20-111210.1158/1535-716  
positive Expression: MAPK1 --> (34486197 10.1002/cbin.1169710.1002/cbin.11697  
positive Expression: MAPK1 --> (34486197 10.1002/cbin.1169710.1002/cbin.11697  
positive Expression: MAPK1 --> (34599981 10.1016/j.bbamcr.2021.11914410.1016/j.bbamcr.  
positive Expression: MAPK1 --> (741 10.1016/j.tibs.2018.09.004  
positive Expression: MAPK1 --> CD274 10.1016/j.molmed.2010.09.006  
positive Expression: MAPK1 --> CD274 10.1186/s12964-019-0391-x  
positive Expression: MAPK1 --> CD274 10.1186/s12964-019-0391-x  
positive Expression: MAPK1 --> CD274 10.1172/JCI132534  
positive Expression: MAPK1 --> CD274 10.1172/JCI127721  
positive Expression: MAPK1 --> CD274 10.1172/JCI127721  
positive Expression: MAPK1 --> CD274 10.1007/s12253-019-00735-9  
positive Expression: MAPK1 --> (21094289 10.1016/j.intimp.2010.11.009  
positive Expression: MAPK1 --> (28222426 10.1159/000460504

positive Expression: MAPK1 --> (29090321 10.1007/s00262-017-2086-8  
positive Expression: MAPK1 --> (27617403 10.1038/labinvest.2016.96  
positive Expression: MAPK1 --> (27221508 10.1016/j.steroids.2016.05.006  
positive Expression: MAPK1 --> (27221508 10.1016/j.steroids.2016.05.006  
positive Expression: MAPK1 --> (20937224  
positive Expression: MAPK1 --> (27784882 10.12659/MSM.900661  
positive Expression: MAPK1 --> (28720430 10.1016/j.pharmthera.2017.07.004  
positive Expression: MAPK1 --> (28720430 10.1016/j.pharmthera.2017.07.004  
positive Expression: MAPK1 --> (28451792 10.1007/s00262-017-2005-z  
positive Expression: MAPK1 --> (20937224 10.1170/156  
positive Expression: MAPK1 --> (26707383 10.1016/j.cllc.2015.11.006  
positive Expression: MAPK1 --> (1975 10.1016/j.cllc.2015.11.006  
positive Expression: MAPK1 --> (1975 10.1016/j.cllc.2015.11.006  
positive Expression: MAPK1 --> (1975 10.1016/j.cllc.2015.11.006  
positive Expression: MAPK1 --> CD274  
positive Expression: MAPK1 --> (34729305 10.1016/j.apsb.2021.03.01010.1016/j.apsb.2021  
positive Expression: MAPK1 --> (34805266 10.3389/fmolb.2021.68730510.3389/fmolb.2021.6  
positive Expression: MAPK1 --> (34830179 10.3390/ijms222212297  
positive Expression: MAPK1 --> (34830179 10.3390/ijms222212297  
positive Expression: MAPK1 --> (34830196 10.3390/ijms222212314  
positive Expression: MAPK1 --> (34830209 10.3390/ijms222212330  
positive Expression: MAPK1 --> (34480337 10.1007/s12035-021-02495-7  
positive Expression: MAPK1 --> (35237605 10.3389/fcell.2022.82978810.3389/fcell.2022.8  
positive Expression: MAPK1 --> (35031925 10.1007/s11033-021-07063-9  
positive Expression: MAPK1 --> (35305624 10.1186/s12935-022-02550-w10.1186/s12935-022-  
positive Expression: MAPK1 --> (34167551 10.1186/s13046-021-01972-010.1186/s13046-021-  
positive Expression: MAPK1 --> (35305624 10.1186/s12935-022-02550-w  
positive Expression: MAPK1 --> (33030957 10.4149/neo\_2020\_200531N589  
positive Expression: MAPK1 --> (33030957 10.4149/neo\_2020\_200531N589  
positive Expression: MAPK1 --> (33030957 10.4149/neo\_2020\_200531N589  
positive Expression: MAPK1 --> (35948200 10.1016/j.trsl.2022.08.005  
positive Expression: MAPK1 --> (35955729 10.3390/ijms23158599  
positive Expression: MAPK1 --> (36239572 10.1002/mc.23471  
positive Expression: MAPK1 --> (36528587 10.1186/s12935-022-02805-6  
positive Regulation: CD274 --> M33771483 10.1016/j.yexpr.2021.112575  
positive Regulation: CD274 --> M30898647 10.1016/j.lfs.2019.03.040  
positive Regulation: CD274 --> M29510196 10.1016/j.bbadis.2018.03.002  
positive Regulation: CD274 --> M31422157 10.1016/j.semcancer.2019.08.015  
positive Regulation: CD274 --> M33301862 10.1016/j.semcancer.2020.12.001  
positive Regulation: CD274 --> M31005030 10.1016/j.drup.2019.04.001  
positive Regulation: CD274 --> M29576280 10.1016/j.hbpd.2018.03.001  
positive Regulation: CD274 --> M32663768 10.1016/j.intimp.2020.106759  
positive Regulation: CD274 --> M30603685 10.1016/j.heliyon.2018.e01039  
positive Regulation: CD274 --> M23792703 10.1016/j.autrev.2013.05.003

positive Regulation: CD274 --> M28703774 10.3390/ijms18071517  
 positive Regulation: CD274 --> M28982322 10.2174/1381612823666171004120152  
 positive Regulation: CD274 --> M30377341 10.1038/s41416-018-0298-0  
 positive Regulation: CD274 --> M30377341 10.1038/s41416-018-0298-0  
 positive Regulation: CD274 --> M30377341 10.1038/s41416-018-0298-0  
 positive Regulation: CD274 --> M31098772 10.1007/s10616-019-00316-3  
 positive Regulation: CD274 --> M32484460 10.1172/JCI133334  
 positive Regulation: CD274 --> M27140316 10.1038/bjc.2016.120  
 positive Regulation: CD274 --> M29245948 10.18632/oncotarget.2191410.18632/oncotarget.  
 positive Regulation: CD274 --> M29510196 10.1016/j.bbadis.2018.03.00210.1016/j.bbadis.  
 positive Regulation: CD274 --> M29510196 10.1016/j.bbadis.2018.03.00210.1016/j.bbadis.  
 positive Regulation: CD274 --> M30603685 10.1016/j.heliyon.2018.e0103910.1016/j.heliyc  
 positive Regulation: CD274 --> M32277292 10.1007/s12032-020-01372-y10.1007/s12032-020-  
 positive Regulation: CD274 --> M33901179 10.1371/journal.pbio.300119910.1371/journal.p  
 positive Regulation: CD274 --> M34185141 10.1007/s00432-021-03694-4  
 positive Regulation: CD274 --> MAPK1 10.1016/j.semancer.2019.08.015  
 positive Regulation: CD274 --> MAPK1 10.1172/JCI133334  
 positive Regulation: CD274 --> M20008522  
 positive Regulation: CD274 --> M20008522  
 positive Regulation: CD274 --> MAPK1 10.3390/ijms23010245  
 positive Regulation: CD274 --> M34847253 10.1096/fj.202101306R  
 positive Regulation: CD274 --> M34847253 10.1096/fj.202101306R  
 positive Regulation: CD274 --> M35305624 10.1186/s12935-022-02550-w  
 positive Regulation: CD274 --> M35449134 10.1038/s41467-022-29930-0  
 positive Regulation: CD274 --> M36050267 10.1111/1440-1681.13717  
 positive Regulation: CD274 --> M34018092 10.1007/s10565-021-09613-0  
 positive Regulation: CD274 --> M36232331 10.3390/ijms231911031  
 positive Regulation: CD274 --> M36232331 10.3390/ijms231911031  
 positive Regulation: CD274 --> M36375639 10.1016/j.jbc.2022.102694  
 positive Regulation: CD274 --> M36375639 10.1016/j.jbc.2022.102694  
 negative Expression: KDM5B ---| 134528900 10.18632/aging.203528  
 negative Expression: KDM5B ---| 125877751 10.1007/s13277-015-3418-y10.1007/s13277-015-3  
 negative Expression: KDM5B ---| 134528900 10.18632/aging.203528  
 negative Expression: KDM5B ---| 125877751 10.1007/s13277-015-3418-y10.1007/s13277-015-3  
 negative Expression: KDM5B ---| 131949850  
 negative Expression: KDM5B ---| 131949850  
 negative Expression: KDM5B ---| 134528900 10.18632/aging.203528  
 negative Expression: KDM5B ---| 130343192 10.1016/j.ejmech.2018.10.040  
 positive Regulation: TP53 --> cf28755993 10.1016/j.ijpharm.2017.07.056  
 positive Regulation: TP53 --> cf29615301 10.1016/j.dld.2018.02.009  
 positive Regulation: TP53 --> cf21211512 10.1016/j.abb.2010.12.034  
 positive Regulation: TP53 --> cf15865929 10.1016/j.bbrc.2005.03.153  
 positive Regulation: TP53 --> cf20233581 10.1016/j.bbrc.2010.03.082  
 positive Regulation: TP53 --> chemosensit 10.1016/S0006-2952(01)00733-X  
 positive Regulation: TP53 --> cf12694871 10.1016/S0006-2952(03)00078-9  
 positive Regulation: TP53 --> cf12948852 10.1016/S0006-2952(03)00397-6  
 positive Regulation: TP53 --> cf17445779 10.1016/j.bcp.2007.03.009  
 positive Regulation: TP53 --> cf19028473 10.1016/j.cbi.2008.10.048  
 positive Regulation: TP53 --> cf11435891 10.1016/S0022-5347(05)66150-2  
 positive Regulation: TP53 --> chemosensit 10.1016/S0022-5347(05)67323-5  
 positive Regulation: TP53 --> cf10379742 10.1097/00005392-199907000-00017  
 positive Regulation: TP53 --> cf12175703 10.1016/S0024-3205(02)01900-8  
 positive Regulation: TP53 --> cf12409142 10.1016/S0024-3205(02)02177-X  
 positive Regulation: TP53 --> cf14761678 10.1016/j.taap.2003.09.011

positive Regulation: TP53 --> cf 15891997 10.1016/j.humpath.2005.01.018  
positive Regulation: TP53 --> cf 12893182 10.1016/S0090-8258(03)00282-8  
positive Regulation: TP53 --> cf 12893182 10.1016/S0090-8258(03)00282-8  
positive Regulation: TP53 --> cf 15790436 10.1016/j.ygyno.2004.12.053  
positive Regulation: TP53 --> cf 15790436 10.1016/j.ygyno.2004.12.053  
positive Regulation: TP53 --> cf 16380178 10.1016/j.tibtech.2005.12.002  
positive Regulation: TP53 --> cf 22446689 10.1016/j.jhep.2011.11.029  
positive Regulation: TP53 --> cf 11557115 10.1016/S0169-5002(01)00230-6  
positive Regulation: TP53 --> cf 16307839 10.1016/j.fct.2005.10.003  
positive Regulation: TP53 --> cf 10737712 10.1016/S0304-3835(99)00345-6  
positive Regulation: TP53 --> cf 10893449 10.1016/S0304-3835(00)00480-8  
positive Regulation: TP53 --> cf 12880966 10.1016/S0304-3835(03)00088-0  
positive Regulation: TP53 --> cf 15327837 10.1016/j.canlet.2004.03.044  
positive Regulation: TP53 --> cf 16023288 10.1016/j.canlet.2005.06.002  
positive Regulation: TP53 --> cf 16919866 10.1016/j.canlet.2006.06.013  
positive Regulation: TP53 --> cf 18657356 10.1016/j.canlet.2008.06.006  
positive Regulation: TP53 --> cf 19467788 10.1016/j.ctrv.2009.04.008  
positive Regulation: TP53 --> cf 21856084 10.1016/j.mehy.2011.07.052  
positive Regulation: TP53 --> cf 22353361 10.1016/j.gene.2012.01.099  
positive Regulation: TP53 --> chemosensit 10.1016/j.tiv.2012.03.004  
positive Regulation: TP53 --> cf 17875383 10.1016/j.ijom.2007.06.006  
positive Regulation: TP53 --> cf 17875383 10.1016/j.ijom.2007.06.006  
positive Regulation: TP53 --> cf 16337111 10.1016/j.colsurfb.2005.10.006  
positive Regulation: TP53 --> cf 16713222 10.1016/j.phymed.2006.03.009  
positive Regulation: TP53 --> cf 15691646 10.1016/j.ejca.2004.10.014  
positive Regulation: TP53 --> cf 16146690 10.1016/j.ejca.2005.04.044  
positive Regulation: TP53 --> cf 12850529 10.1016/S1040-8428(03)00066-0  
positive Regulation: TP53 --> cf 16253824 10.1053/j.semtcvs.2005.08.002  
positive Regulation: TP53 --> cf 19508919 10.1016/j.drudis.2009.03.008  
positive Regulation: TP53 --> cf 21195657 10.1016/j.drug.2010.12.001  
positive Regulation: TP53 --> cf 12829013 10.1016/S1471-4914(03)00084-4  
positive Regulation: TP53 --> cf 12726865 10.1016/S1535-6108(03)00078-3  
positive Regulation: TP53 --> cf 20832747 10.1016/j.ccr.2010.08.016  
positive Regulation: TP53 --> cf 17240826 10.1016/j.thorsurg.2006.08.001  
positive Regulation: TP53 --> cf 23040255 10.1053/j.seminoncol.2012.08.003  
positive Regulation: TP53 --> cf 22445862 10.1016/j.tiv.2012.03.004  
positive Regulation: TP53 --> cf 23313858 10.1016/j.yexcr.2012.12.025  
positive Regulation: TP53 --> cf 23973262 10.1016/j.canlet.2013.08.028  
positive Regulation: TP53 --> cf 24462821 10.1016/j.canlet.2014.01.011  
positive Regulation: TP53 --> cf 25117446 10.1016/j.bbrc.2014.08.014  
positive Regulation: TP53 --> cf 25220870 10.1016/j.biochi.2014.09.001  
positive Regulation: TP53 --> chemosensit 10.1016/j.toxlet.2014.11.016  
positive Regulation: TP53 --> cf 24681512 10.1016/j.phrs.2014.03.007  
positive Regulation: TP53 --> cf 24681512 10.1016/j.phrs.2014.03.007  
positive Regulation: TP53 --> cf 25448278 10.1016/j.toxlet.2014.11.016  
positive Regulation: TP53 --> cf 21293058  
positive Regulation: TP53 --> cf 21293058  
positive Regulation: TP53 --> cf 11095436  
positive Regulation: TP53 --> cf 11095436  
positive Regulation: TP53 --> cf 9768682  
positive Regulation: TP53 --> cf 9661637  
positive Regulation: TP53 --> cf 20075077  
positive Regulation: TP53 --> cf 19055826  
positive Regulation: TP53 --> cf 17626635

positive Regulation: TP53 --> cf 17150101  
positive Regulation: TP53 --> cf 17121812  
positive Regulation: TP53 --> cf 16159878  
positive Regulation: TP53 --> cf 16120770  
positive Regulation: TP53 --> cf 15262986  
positive Regulation: TP53 --> cf 12890671  
positive Regulation: TP53 --> cf 12890671  
positive Regulation: TP53 --> cf 12690107  
positive Regulation: TP53 --> cf 12615954  
positive Regulation: TP53 --> cf 12481433  
positive Regulation: TP53 --> cf 12481433  
positive Regulation: TP53 --> cf 18818514 10. 4161/cc. 7. 19. 6777  
positive Regulation: TP53 --> cf 27313779 10. 7150/jca. 1450610. 7150/jca. 14506  
positive Regulation: TP53 --> cf 27484708 10. 1080/15384101. 2016. 1215390  
positive Regulation: TP53 --> cf 32492656 10. 18632/aging. 10337710. 18632/aging. 103377  
positive Regulation: TP53 --> cf 27313779 10. 7150/jca. 1450610. 7150/jca. 14506  
positive Regulation: TP53 --> cf 12615954  
positive Regulation: TP53 --> cf 12615954  
positive Regulation: TP53 --> cf 12615954  
positive Regulation: TP53 --> cf 9694807  
positive Regulation: TP53 --> cf 14769944  
positive Regulation: TP53 --> cf 11583579  
positive Regulation: TP53 --> cf 11248087  
positive Regulation: TP53 --> cf 9122197  
positive Regulation: TP53 --> cf 16755297  
positive Regulation: TP53 --> cf 15153941  
positive Regulation: TP53 --> cf 14739942  
positive Regulation: TP53 --> cf 11791171  
positive Regulation: TP53 --> cf 10698490  
positive Regulation: TP53 --> cf 10471039  
positive Regulation: TP53 --> cf 16260623  
positive Regulation: TP53 --> cf 20706634  
positive Regulation: TP53 --> cf 27329169 10. 1007/s10549-016-3869-x  
positive Regulation: TP53 --> chemosensit 10. 1186/s13046-014-0091-8  
positive Regulation: TP53 --> cf 27484466 10. 1186/s12885-016-2617-2  
positive Regulation: TP53 --> cf 27484725 10. 3892/mmr. 2016. 5552  
positive Regulation: TP53 --> cf 27485825 10. 3892/mmr. 2016. 5561  
positive Regulation: TP53 --> cf 27485825 10. 3892/mmr. 2016. 5561  
positive Regulation: TP53 --> chemosensit 10. 1096/fj. 201601240R  
positive Regulation: TP53 --> chemosensit 10. 1096/fj. 201601240R  
positive Regulation: TP53 --> cf 16973289 10. 1016/j. bbcan. 2006. 08. 001  
positive Regulation: TP53 --> cf 18064040  
positive Regulation: TP53 --> cf 28112370 10. 3892/or. 2017. 5399  
positive Regulation: TP53 --> cf 8642047 10. 1007/bf01220804  
positive Regulation: TP53 --> cf 12615954  
positive Regulation: TP53 --> cf 28467351 10. 3390/i jms18050961  
positive Regulation: TP53 --> cf 22615851 10. 1371/journal. pone. 0036940  
positive Regulation: TP53 --> cf 30106452 10. 3892/or. 2018. 6628  
positive Regulation: TP53 --> cf 30106452 10. 3892/or. 2018. 6628  
positive Regulation: TP53 --> chemosensit 10. 1186/s12935-018-0690-0

positive Regulation: TP53 --> cf 30387834 10.3892/ijo.2018.4613  
 positive Regulation: TP53 --> chemosensit10.4149/neo\_2018\_180125N55  
 positive Regulation: TP53 --> chemosensit10.1042/BSR20180773  
 positive Regulation: TP53 --> cf 31108984 10.3390/ijms20102454  
 positive Regulation: TP53 --> chemosensit10.1186/s12935-019-0910-2  
 positive Regulation: TP53 --> cf 32377739 10.3892/mmr.2020.11121  
 positive Regulation: TP53 --> chemosensit10.1042/BSR20191488  
 positive Regulation: TP53 --> chemosensit10.1042/BSR20191488  
 positive Regulation: TP53 --> cf 33184290 10.1038/s41419-020-03185-310.1038/s41419-020-  
 positive Regulation: TP53 --> cf 33184290 10.1038/s41419-020-03185-3  
 positive Regulation: TP53 --> cf 33256191 10.3390/ijms21238991  
 positive Regulation: TP53 --> chemosensit10.1016/j.jbior.2020.100780  
 positive Regulation: TP53 --> cf 32876741 10.1007/s00508-020-01729-3  
 positive Regulation: TP53 --> cf 33785447 10.1016/j.semcancer.2021.03.010  
 positive Regulation: TP53 --> chemosensit10.1016/j.omtn.2021.07.022  
 positive Regulation: TP53 --> chemosensit10.1016/j.jtcms.2022.01.001  
 Binding: UCA1 ---- TP53 28738810 10.1186/s12943-017-0699-3  
 Binding: UCA1 ---- TP53 10.1016/j.semcancer.2020.12.019  
 negative Regulation: LRP8 ---| PF24840660 10.1016/j.bbadis.2014.05.009  
 negative Regulation: LRP8 ---| PF24840660 10.1016/j.bbadis.2014.05.009  
 negative Regulation: LRP8 ---| PPARG  
 positive DirectRegulation: PRND -24339999 10.1371/journal.pone.0082130  
 positive DirectRegulation: PRND -22715097 10.1074/jbc.M112.340638  
 positive DirectRegulation: PRND -27145840 10.1146/annurev-biochem-060815-014710  
 positive DirectRegulation: PRND -24005412 10.1038/nature12481  
 positive DirectRegulation: PRND -24003888 10.1042/BSR20130065  
 positive DirectRegulation: PRND -23263379 10.1038/ncb2641  
 positive DirectRegulation: PRND -24339999 10.1371/journal.pone.0082130  
 positive DirectRegulation: PRND -24775734 10.1016/j.tibs.2014.04.001  
 positive DirectRegulation: PRND -28489421 10.1146/annurev-biochem-060815-014616  
 positive DirectRegulation: PRND --> TP53 10.1128/MCB.00118-17  
 positive DirectRegulation: PRND -30341616 10.1007/978-1-4939-8820-4\_17  
 positive Expression: GPER1 --> (30227306 10.1016/j.neo.2018.08.010  
 positive Expression: GPER1 --> (31483053 10.14670/HH-18-157  
 positive Expression: GPER1 --> (26731262 10.1371/journal.pone.0145212  
 positive Expression: GPER1 --> (30227306 10.1016/j.neo.2018.08.01010.1016/j.neo.2018.0  
 positive Expression: GPER1 --> (30227306 10.1016/j.neo.2018.08.010  
 positive Expression: GPER1 --> (30227306 10.1016/j.neo.2018.08.010  
 Regulation: IGFBP4 ---> AKT1 28179206 10.1016/j.neulet.2017.01.066  
 Regulation: IGFBP4 ---> AKT1 23499909 10.1016/j.cellsig.2013.02.018  
 Regulation: IGFBP4 ---> AKT1 23499909 10.1016/j.cellsig.2013.02.018  
 Regulation: IGFBP4 ---> AKT1 23639626 10.1016/j.tox.2013.04.014  
 Regulation: IGFBP4 ---> AKT1 15572521  
 Regulation: IGFBP4 ---> AKT1 23499909 10.1016/j.cellsig.2013.02.01810.1016/j.cellsi  
 Regulation: IGFBP4 ---> AKT1 23971193 10.2478/pjvs-2013-0036  
 Regulation: IGFBP4 ---> AKT1 29992318 10.1093/nar/gky58910.1093/nar/gky589



positive DirectRegulation: ING4 -21454715 10.1074/jbc.M111.230961  
positive DirectRegulation: ING4 -21052543 10.1155/2011/963614  
positive DirectRegulation: ING4 --> TP53 10.1042/BSR20180773  
positive DirectRegulation: ING4 -30403588 10.14715/cmb/2018.64.13.2  
positive DirectRegulation: ING4 -27466989  
positive DirectRegulation: ING4 -28050784 10.1007/s10620-016-4429-2  
positive DirectRegulation: ING4 -27544390 10.1007/s00432-016-2219-z  
positive DirectRegulation: ING4 -27544390 10.1007/s00432-016-2219-z  
positive DirectRegulation: ING4 -26803518 10.1007/s13277-016-4842-3  
positive DirectRegulation: ING4 -16024799  
positive DirectRegulation: ING4 -17646389  
positive DirectRegulation: ING4 -16520380  
positive DirectRegulation: ING4 -26072331 10.1016/j.expchem.2015.05.010  
positive DirectRegulation: ING4 -24333729 10.1016/j.canlet.2013.11.016  
positive DirectRegulation: ING4 -23603392 10.1016/j.febslet.2013.04.004  
positive DirectRegulation: ING4 -23603392 10.1016/j.febslet.2013.04.004  
positive DirectRegulation: ING4 -15743678 10.1016/j.biocel.2004.09.008  
positive DirectRegulation: ING4 -22366145 10.1016/j.jbspin.2012.01.008  
positive DirectRegulation: ING4 -18571892 10.1016/j.biopha.2008.04.006  
positive DirectRegulation: ING4 -14572637 10.1016/S0014-5793(03)01024-X  
positive DirectRegulation: ING4 -18775696 10.1016/j.yexcr.2008.08.002  
positive DirectRegulation: ING4 -18775696 10.1016/j.yexcr.2008.08.002  
positive DirectRegulation: ING4 -15748897 10.1016/j.yexcr.2004.11.023  
positive DirectRegulation: ING4 -15882981 10.1016/j.bbrc.2005.04.023  
positive DirectRegulation: ING4 -12750254  
positive DirectRegulation: ING4 -21177815 10.1128/JVI.02279-10  
positive DirectRegulation: ING4 -23967213 10.1371/journal.pone.0071453  
positive DirectRegulation: ING4 -20534538 10.1073/pnas.0912116107  
positive DirectRegulation: ING4 -22228137 10.1007/s00432-011-1099-5  
positive DirectRegulation: ING4 -21454715 10.1074/jbc.M111.230961  
positive DirectRegulation: ING4 -21454715 10.1074/jbc.M111.230961



positive DirectRegulation: ING4 --> TP53 10.1042/BSR20180773  
positive DirectRegulation: ING4 --> TP53 10.14670/HH-11-979  
positive DirectRegulation: ING4 -27544390 10.1007/s00432-016-2219-z  
positive DirectRegulation: ING4 -17954561  
positive DirectRegulation: ING4 -17954561  
positive DirectRegulation: ING4 -15528276  
positive DirectRegulation: ING4 -20534538  
positive DirectRegulation: ING4 -16520380  
positive DirectRegulation: ING4 -23603392 10.1016/j.febslet.2013.04.004  
positive DirectRegulation: ING4 -16387653 10.1016/j.molcel.2005.12.007  
positive DirectRegulation: ING4 -15935570 10.1016/j.gene.2005.02.014  
positive DirectRegulation: ING4 -15251430 10.1016/j.febslet.2004.06.010  
positive DirectRegulation: ING4 -15251430 10.1016/j.febslet.2004.06.010  
positive DirectRegulation: ING4 -18775696 10.1016/j.yexcr.2008.08.002  
positive DirectRegulation: ING4 -18775696 10.1016/j.yexcr.2008.08.002  
positive DirectRegulation: ING4 -15748897 10.1016/j.yexcr.2004.11.023  
positive DirectRegulation: ING4 -15882981 10.1016/j.bbrc.2005.04.023  
positive DirectRegulation: ING4 -20707719 10.1089/cbr.2010.077810.1089/cbr.2010.0778  
positive DirectRegulation: ING4 -22595793 10.1038/cgt.2012.24  
positive DirectRegulation: ING4 -21177815 10.1128/JVI.02279-10  
positive DirectRegulation: ING4 -21177815 10.1128/JVI.02279-10  
positive DirectRegulation: ING4 -23308284 10.1371/journal.pone.0053791  
positive DirectRegulation: ING4 -21454715 10.1074/jbc.M111.230961  
positive DirectRegulation: ING4 -15935570 10.1016/j.gene.2005.02.014  
positive DirectRegulation: ING4 -15935570 10.1016/j.gene.2005.02.014  
positive DirectRegulation: ING4 -15882981 10.1016/j.bbrc.2005.04.023  
positive DirectRegulation: ING4 -21177815 10.1128/JVI.02279-10  
positive DirectRegulation: ING4 -16520380  
positive DirectRegulation: ING4 -15882981 10.1016/j.bbrc.2005.04.023  
positive DirectRegulation: ING4 --> TP53  
positive DirectRegulation: ING4 --> TP53 10.3390/ijms21041351  
positive DirectRegulation: ING4 -33076322 10.3390/ijms21207622  
negative Regulation: NOTCH1 ---| 19473993  
negative Regulation: NOTCH1 ---| 19473992  
negative DirectRegulation: PTGS2 21254973 10.2174/092986711794940833  
negative DirectRegulation: PTGS2 20558725 10.1074/jbc.M110.135251  
negative DirectRegulation: PTGS2 ---| TP53 10.1530/ERC-17-0450  
negative DirectRegulation: PTGS2 28346420 10.1038/onc.2017.73  
negative DirectRegulation: PTGS2 21209926  
negative DirectRegulation: PTGS2 12411481  
negative DirectRegulation: PTGS2 18356920  
negative DirectRegulation: PTGS2 11756671  
negative DirectRegulation: PTGS2 11756671  
negative DirectRegulation: PTGS2 16800815  
negative DirectRegulation: PTGS2 11756433  
negative DirectRegulation: PTGS2 15550400



negative DirectRegulation: PTGS2 29247872 10.1016/j.gpb.2017.03.005  
 negative DirectRegulation: PTGS2 29242151 10.1016/j.fct.2017.12.01110.1016/j.fct.2017.1  
 negative DirectRegulation: PTGS2 22561872 10.1016/j.taap.2012.04.023  
 negative DirectRegulation: PTGS2 19465063 10.1016/j.bbamcr.2009.05.006  
 negative DirectRegulation: PTGS2 19465063 10.1016/j.bbamcr.2009.05.006  
 negative DirectRegulation: PTGS2 15707991 10.1016/j.bbrc.2005.01.072  
 negative DirectRegulation: PTGS2 15608668 10.1038/sj.onc.1208353  
 negative DirectRegulation: PTGS2 15608668 10.1038/sj.onc.1208353  
 negative DirectRegulation: PTGS2 11687965 10.1038/sj.onc.1204907  
 negative DirectRegulation: PTGS2 24069219 10.1371/journal.pone.0073656  
 negative DirectRegulation: PTGS2 21765464 10.1038/onc.2011.234  
 negative DirectRegulation: PTGS2 21765464 10.1038/onc.2011.234  
 negative DirectRegulation: PTGS2 21765464 10.1038/onc.2011.234  
 negative DirectRegulation: PTGS2 29578814 10.1080/01635581.2018.1446091  
 negative DirectRegulation: PTGS2 16540558  
 negative DirectRegulation: PTGS2 11687965  
 negative DirectRegulation: PTGS2 24792472 10.1016/j.jphotobiol.2014.03.015  
 negative DirectRegulation: PTGS2 24792472 10.1016/j.jphotobiol.2014.03.015  
 negative DirectRegulation: PTGS2 22561872 10.1016/j.taap.2012.04.023  
 negative DirectRegulation: PTGS2 19457709 10.1016/j.oraloncology.2009.03.016  
 negative DirectRegulation: PTGS2 21763744 10.1016/j.neuint.2011.06.018  
 negative DirectRegulation: PTGS2 19465063 10.1016/j.bbamcr.2009.05.006  
 negative DirectRegulation: PTGS2 ---| TP53 10.1016/j.taap.2012.04.023  
 negative DirectRegulation: PTGS2 15707991 10.1016/j.bbrc.2005.01.072  
 negative DirectRegulation: PTGS2 23328527 10.1164/rccm.201208-13610C  
 negative DirectRegulation: PTGS2 15550400  
 negative DirectRegulation: PTGS2 26212257 10.1016/j.biocel.2015.07.009  
 Regulation: CD274 ---> MCL1 34193942 10.1038/s41388-021-01910-6  
 Regulation: CD274 ---> MCL1 33581579 10.1016/j.intimp.2021.107443  
 Expression: PPARG ---> NGF 33453816 10.1074/jbc.RA119.012019  
 Expression: PPARG ---> NGF 29032144 10.1016/j.pneurobio.2017.10.002  
 Expression: PPARG ---> NGF 15713689  
 Expression: PPARG ---> NGF 15713689  
 Expression: PPARG ---> NGF 15100092  
 Expression: PPARG ---> NGF 33082140 10.1074/jbc.RA119.012019  
 Expression: PPARG ---> NGF 24603727 10.1371/journal.ppat.1003980  
 Expression: PPARG ---> NGF 25159899 10.1186/s12967-014-0235-9  
 Expression: PPARG ---> NGF 24934600 10.1089/neu.2014.3429  
 Expression: PPARG ---> NGF  
 Expression: PPARG ---> NGF 10.1074/jbc.RA119.012019  
 negative Expression: BIRC7 ---| P 26622485 10.3892/etm.2015.2675  
 Regulation: SPP1 ---> RAC1 18174176  
 Regulation: SPP1 ---> RAC1 18174176  
 Regulation: SPP1 ---> RAC1 18174176



positive Regulation: PTGS2 --> #20022932  
positive Regulation: PTGS2 --> #21078168  
positive Regulation: PTGS2 --> #21078168  
positive Regulation: PTGS2 --> #20042609  
positive Regulation: PTGS2 --> #19052170  
positive Regulation: PTGS2 --> #16966336  
positive Regulation: PTGS2 --> #16966336  
positive Regulation: PTGS2 --> #15016316  
positive Regulation: PTGS2 --> #12704185  
positive Regulation: PTGS2 --> #19099539  
positive Regulation: PTGS2 --> #16800815  
positive Regulation: PTGS2 --> #20661229  
positive Regulation: PTGS2 --> #17285134  
positive Regulation: PTGS2 --> #16160697  
positive Regulation: PTGS2 --> #16396944  
positive Regulation: PTGS2 --> #16396944  
positive Regulation: PTGS2 --> #16014934  
positive Regulation: PTGS2 --> #16014934  
positive Regulation: PTGS2 --> #16014934  
positive Regulation: PTGS2 --> #17259595  
positive Regulation: PTGS2 --> #22563076 10.1074/jbc.M112.347245  
positive Regulation: PTGS2 --> #23229294 10.3892/or.2012.2158  
positive Regulation: PTGS2 --> #23243000 10.1091/mbc.E12-08-0637  
positive Regulation: PTGS2 --> #20203246 10.1164/rccm.200905-06740C  
positive Regulation: PTGS2 --> #20203246 10.1164/rccm.200905-06740C  
positive Regulation: PTGS2 --> #19687189 10.1093/ecam/nep108  
positive Regulation: PTGS2 --> #21561856 10.1074/jbc.M111.222349  
positive Regulation: PTGS2 --> #21561856 10.1074/jbc.M111.222349  
positive Regulation: PTGS2 --> #19293251 10.1093/ecam/nep020  
positive Regulation: PTGS2 --> #20467837 10.1007/s12035-010-8139-z  
positive Regulation: PTGS2 --> #20803081 10.1245/s10434-010-1268-9  
positive Regulation: PTGS2 --> #21078168 10.1186/1471-2407-10-626  
positive Regulation: PTGS2 --> #21078168 10.1186/1471-2407-10-626  
positive Regulation: PTGS2 --> #21457561 10.1186/1743-422X-8-155  
positive Regulation: PTGS2 --> #21457561 10.1186/1743-422X-8-155  
positive Regulation: PTGS2 --> #22048655 10.1007/s00432-011-1080-3  
positive Regulation: PTGS2 --> #22350613 10.1007/s00423-012-0916-x  
positive Regulation: PTGS2 --> #22983360 10.1038/ni.2408  
positive Regulation: PTGS2 --> #23900573 10.3892/i jo.2013.2041  
positive Regulation: PTGS2 --> #23877542 10.3892/i jo.2013.2024  
positive Regulation: PTGS2 --> #22349822 10.1038/onc.2012.47  
positive Regulation: PTGS2 --> #23658755 10.1371/journal.pone.0062627  
positive Regulation: PTGS2 --> #23737956 10.1371/journal.pone.0063872  
positive Regulation: PTGS2 --> #23922859 10.1371/journal.pone.0069928  
positive Regulation: PTGS2 --> #23922175 10.1007/s13277-013-1024-4  
positive Regulation: PTGS2 --> #24988184 10.1371/journal.pone.0100079  
positive Regulation: PTGS2 --> #24988184 10.1371/journal.pone.0100079  
positive Regulation: PTGS2 --> #25823424 10.3892/i jo.2015.2940  
positive Regulation: PTGS2 --> #25997834 10.3892/i jo.2015.3012  
positive Regulation: PTGS2 --> #12939602  
positive Regulation: PTGS2 --> #15309882  
positive Regulation: PTGS2 --> #15312381  
positive Regulation: PTGS2 --> #15492414  
positive Regulation: PTGS2 --> #15767780

positive Regulation: PTGS2 --> #15922857  
 positive Regulation: PTGS2 --> #16641552  
 positive Regulation: PTGS2 --> #17198778  
 positive Regulation: PTGS2 --> #17070098  
 positive Regulation: PTGS2 --> #18571350 10.1016/j.jep.2008.05.001  
 positive Regulation: PTGS2 --> #18798061 10.1080/07357900801941860  
 positive Regulation: PTGS2 --> #19671676 10.1158/1541-7786.MCR-09-0004  
 positive Regulation: PTGS2 --> #19621391 10.1002/ijc.24757  
 positive Regulation: PTGS2 --> #19621391 10.1002/ijc.24757  
 positive Regulation: PTGS2 --> #20486853 10.3109/07357907.2010.483504  
 positive Regulation: PTGS2 --> #20854947 10.1016/j.bone.2010.09.020  
 positive Regulation: PTGS2 --> #21807123 10.1016/j.intimp.2011.07.011  
 positive Regulation: PTGS2 --> #22221825 10.1111/j.1872-034X.2011.00947.x  
 positive Regulation: PTGS2 --> #22546756 10.1016/j.mehy.2012.04.012  
 positive Regulation: PTGS2 --> #22784710 10.1158/1535-7163.MCT-12-0342  
 positive Regulation: PTGS2 --> #23149922 10.1158/0008-5472.CAN-12-2220  
 positive Regulation: PTGS2 --> #23435965 10.1007/s10495-013-0825-7  
 positive Regulation: PTGS2 --> #23435965 10.1007/s10495-013-0825-7  
 positive Regulation: PTGS2 --> #24260338 10.1371/journal.pone.0080076  
 positive Regulation: PTGS2 --> #24296130 10.1016/j.fct.2013.11.035  
 positive Regulation: PTGS2 --> #25849942  
 positive Regulation: PTGS2 --> #25770423 10.1016/j.bbrc.2015.03.008  
 positive Regulation: PTGS2 --> #25770423 10.1016/j.bbrc.2015.03.008  
 positive Regulation: PTGS2 --> #25582828 10.1111/cmi.12414  
 positive Regulation: PTGS2 --> #26323553 10.3892/or.2015.4202  
 positive Regulation: PTGS2 --> #26418808 10.1002/jbt.21769  
 positive Regulation: PTGS2 --> #26408666 10.4049/jimmunol.150070410.4049/jimmunol.1500  
 positive Regulation: PTGS2 --> #26794001 10.3892/or.2016.4584  
 positive Regulation: PTGS2 --> AKT1  
 positive Regulation: PTGS2 --> #27725865  
 Expression: PPARG ---> CD274 21435906 10.1016/j.healun.2011.01.704  
 Expression: PPARG ---> CD274 25072357 10.1016/j.lfs.2014.07.02110.1016/j.lfs.2014.0  
 Expression: PPARG ---> CD274 22425227 10.1016/j.cellimm.2012.02.007  
 Expression: PPARG ---> CD274  
 Expression: PPARG ---> CD274 34026331 10.1080/2162402X.2021.190650010.1080/2162402X  
 Expression: PPARG ---> CD274 33766508 10.1016/j.jid.2021.02.748  
 positive Regulation: CLDN1 --> M33189716 10.1016/j.bbamem.2020.183503  
 positive Regulation: CLDN1 --> M29700355 10.1038/s12276-018-0076-3  
 positive Regulation: CLDN1 --> M33629735 10.14670/HH-18-320  
 positive Regulation: CLDN1 --> M23160379 10.1038/onc.2012.505  
 positive Regulation: CLDN1 --> M25798937 10.1038/nbt.3179  
 Binding: ING4 ---- BECN1 29163768 10.18632/oncotarget.1903310.18632/oncotarget.  
 Binding: ING4 ---- BECN1 29163768 10.18632/oncotarget.1903310.18632/oncotarget.  
 positive Expression: PTEN --> IN24762396 10.1158/0008-5472.CAN-13-307610.1158/0008-547  
 negative Regulation: PTGS2 ---| c31494169 10.1016/j.lfs.2019.116825  
 negative Regulation: PTGS2 ---| c30954568 10.1016/j.bbamcr.2019.04.003  
 negative Regulation: PTGS2 ---| c31473273 10.1016/j.virusres.2019.197735  
 negative Regulation: PTGS2 ---| c16580341 10.1016/j.ajog.2005.07.086  
 negative Regulation: PTGS2 ---| c19836060 10.1016/j.acthis.2009.09.004



negative DirectRegulation: TNFAIF 32460619 10.1080/15548627.2020.1761748  
 negative DirectRegulation: TNFAIF 31661000 10.1186/s12985-019-1224-7  
 negative DirectRegulation: TNFAIF 27779698 10.3892/or.2016.5192  
 negative DirectRegulation: TNFAIF 25912734 10.1016/j.bbadis.2015.04.018  
 negative DirectRegulation: TNFAIF 25912734 10.1016/j.bbadis.2015.04.018  
 negative DirectRegulation: TNFAIF 25912734 10.1016/j.bbadis.2015.04.018  
 negative DirectRegulation: TNFAIF 29920292 10.1016/j.canlet.2018.06.017  
 negative DirectRegulation: TNFAIF 33933441 10.1016/j.yexcr.2021.112631  
 negative DirectRegulation: TNFAIF 24274578 10.1186/1476-4598-12-149  
 negative DirectRegulation: TNFAIF 22949657 10.1073/pnas.1204525109  
 negative DirectRegulation: TNFAIF 22949657 10.1073/pnas.1204525109  
 negative DirectRegulation: TNFAIF 32460619 10.1080/15548627.2020.1761748  
 negative DirectRegulation: TNFAIF 32460619 10.1080/15548627.2020.1761748  
 negative DirectRegulation: TNFAIF 32460619 10.1080/15548627.2020.1761748  
 negative DirectRegulation: TNFAIF 30015980 10.3892/or.2018.6576  
 negative DirectRegulation: TNFAIF 25912734 10.1016/j.bbadis.2015.04.018  
 negative DirectRegulation: TNFAIF8L2 ---| 10.1186/s12985-019-1224-7  
 negative DirectRegulation: TNFAIF 24274578 10.1186/1476-4598-12-149  
 negative DirectRegulation: TNFAIF 24274578 10.1186/1476-4598-12-149  
 negative DirectRegulation: TNFAIF 22949657 10.1073/pnas.1204525109  
 negative DirectRegulation: TNFAIF 32460619 10.1080/15548627.2020.1761748  
 negative Regulation: PHF20 ---| c33982773 10.3892/ijo.2021.5218  
 negative Regulation: PHF20 ---| c33982773 10.3892/ijo.2021.5218  
 negative Regulation: PHF20 ---| c33982773 10.3892/ijo.2021.5218  
 negative Regulation: PHF20 ---| c33982773 10.3892/ijo.2021.521810.3892/ijo.2021.5218  
 negative Regulation: PHF20 ---| c33982773 10.3892/ijo.2021.521810.3892/ijo.2021.5218  
 Regulation: ING4 ---> MAPK1 17517644  
 Regulation: ING4 ---> MAPK1 17517644 10.1073/pnas.0703383104  
 Regulation: ING4 ---> MAPK1 10.1016/j.acthis.2019.06.005  
 negative Expression: UCA1 ---| BF 33773561 10.31557/APJCP.2021.22.3.947  
 negative Expression: UCA1 ---| BF 31106532  
 Regulation: NOTCH1 ---> AKT1 28104225 10.1016/j.biopsych.2016.12.021  
 Regulation: NOTCH1 ---> AKT1 33538798 10.1182/blood.2020005734  
 Regulation: NOTCH1 ---> AKT1 31228468 10.1016/j.cbi.2019.108724  
 Regulation: NOTCH1 ---> AKT1 29454609 10.1016/j.ejphar.2018.02.020  
 Regulation: NOTCH1 ---> AKT1 14583609 10.1074/jbc.M309924200  
 Regulation: NOTCH1 ---> AKT1 28893903 10.1074/jbc.M117.790121  
 Regulation: NOTCH1 ---> AKT1 28302721 10.1074/jbc.M116.759134  
 Regulation: NOTCH1 ---> AKT1 28302721 10.1074/jbc.M116.759134  
 Regulation: NOTCH1 ---> AKT1 23788636 10.1074/jbc.M113.451625



Regulation: NOTCH1 ----> AKT1 23788636 10.1074/jbc.M113.451625  
Regulation: NOTCH1 ----> AKT1 23788636 10.1074/jbc.M113.451625  
Regulation: NOTCH1 ----> AKT1 23788636 10.1074/jbc.M113.451625  
Regulation: NOTCH1 ----> AKT1 23788636 10.1074/jbc.M113.451625  
Regulation: NOTCH1 ----> AKT1 23788636 10.1074/jbc.M113.451625  
Regulation: NOTCH1 ----> AKT1 23788636 10.1074/jbc.M113.451625  
Regulation: NOTCH1 ----> AKT1 26967479 10.1016/j.jid.2015.11.006  
Regulation: NOTCH1 ----> AKT1 31437519 10.1016/j.humpath.2019.08.003  
Regulation: NOTCH1 ----> AKT1 30629981 10.1016/j.imlet.2019.01.004  
Regulation: NOTCH1 ----> AKT1 29908894 10.1016/j.brainresbull.2018.06.005  
Regulation: NOTCH1 ----> AKT1 33032902 10.1053/j.semdp.2020.09.010  
Regulation: NOTCH1 ----> AKT1 30119264 10.1016/j.biopha.2018.07.018  
Regulation: NOTCH1 ----> AKT1 30119264 10.1016/j.biopha.2018.07.018  
Regulation: NOTCH1 ----> AKT1 27639599 10.1016/j.phrs.2016.09.001  
Regulation: NOTCH1 ----> AKT1 27888063 10.1016/j.biocel.2016.11.013  
Regulation: NOTCH1 ----> AKT1 28609656 10.1016/j.ccell.2017.05.006  
Regulation: NOTCH1 ----> AKT1 29723707 10.1016/j.dnarep.2018.04.002  
Regulation: NOTCH1 ----> AKT1 22465038 10.1016/j.yjmcc.2012.03.007  
Regulation: NOTCH1 ----> AKT1 22056375 10.1016/j.lfs.2011.10.012  
Regulation: NOTCH1 ----> AKT1 21193018 10.1016/j.bbcan.2010.12.002  
Regulation: NOTCH1 ----> AKT1 22293023 10.1016/j.tcm.2011.11.006  
Regulation: NOTCH1 ----> AKT1 21993533 10.1016/j.urolonc.2011.07.006  
Regulation: NOTCH1 ----> AKT1 21993533 10.1016/j.urolonc.2011.07.006  
Regulation: NOTCH1 ----> AKT1 20675210 10.1016/j.scr.2010.06.002  
Regulation: NOTCH1 ----> AKT1 24095799 10.1016/j.yexcr.2013.09.019  
Regulation: NOTCH1 ----> AKT1 24095799 10.1016/j.yexcr.2013.09.019  
Regulation: NOTCH1 ----> AKT1 24140475 10.1016/j.cellsig.2013.09.021  
Regulation: NOTCH1 ----> AKT1 24529510 10.1016/j.jcpa.2013.11.213  
Regulation: NOTCH1 ----> AKT1 25109840 10.1016/j.abb.2014.07.023  
Regulation: NOTCH1 ----> AKT1 24775271 10.1016/j.imbio.2014.03.020  
Regulation: NOTCH1 ----> AKT1 24775271 10.1016/j.imbio.2014.03.020  
Regulation: NOTCH1 ----> AKT1 24939178 10.1016/j.ejcb.2014.05.004  
Regulation: NOTCH1 ----> AKT1 25799457 10.1016/j.tips.2015.02.002  
Regulation: NOTCH1 ----> AKT1 26850133 10.1016/j.amjsurg.2015.11.029  
Regulation: NOTCH1 ----> AKT1 18924608  
Regulation: NOTCH1 ----> AKT1 18830414  
Regulation: NOTCH1 ----> AKT1 20030805  
Regulation: NOTCH1 ----> AKT1 14583609  
Regulation: NOTCH1 ----> AKT1 14583609  
Regulation: NOTCH1 ----> AKT1 20616044  
Regulation: NOTCH1 ----> AKT1 20616044  
Regulation: NOTCH1 ----> AKT1 18369158  
Regulation: NOTCH1 ----> AKT1 19838160

Regulation: NOTCH1 ---> AKT1 19265851  
 Regulation: NOTCH1 ---> AKT1 15650752  
 Regulation: NOTCH1 ---> AKT1 27573203 10.3892/i.jo.2016.3598  
 Regulation: NOTCH1 ---> AKT1 26846632 10.1007/s13365-015-0394-3  
 Regulation: NOTCH1 ---> AKT1 27548161 10.3390/ijms17081357  
 Regulation: NOTCH1 ---> AKT1 27719637 10.2174/1381612822666161006160524  
 Regulation: NOTCH1 ---> AKT1 28241766 10.1186/s12967-017-1151-6  
 Regulation: NOTCH1 ---> AKT1 27593934 10.1038/onc.2016.275  
 Regulation: NOTCH1 ---> AKT1 34502291 10.3390/ijms22179382  
 Regulation: NOTCH1 ---> AKT1 34495871 10.18632/aging.203261  
 Regulation: NOTCH1 ---> AKT1 34495871 10.18632/aging.203261  
 Regulation: NOTCH1 ---> AKT1 34465724 10.1038/s41389-021-00348-510.1038/s41389-021-33015852 10.1111/fcp.1260810.1111/fcp.12608  
 Regulation: NOTCH1 ---> AKT1 34495871 10.18632/aging.20326110.18632/aging.203261  
 Regulation: NOTCH1 ---> AKT1 18369158 10.1161/CIRCRESAHA.107.16474910.1161/CIRCRESA  
 Regulation: NOTCH1 ---> AKT1 23788636 10.1074/jbc.M113.45162510.1074/jbc.M113.45162  
 Regulation: NOTCH1 ---> AKT1 23788636 10.1074/jbc.M113.45162510.1074/jbc.M113.45162  
 Regulation: NOTCH1 ---> AKT1 10.2298/ABS210423030R  
 Regulation: NOTCH1 ---> AKT1 10.1016/j.jsps.2021.12.009  
 Regulation: NOTCH1 ---> AKT1 34995552 10.1016/j.mvr.2021.10430810.1016/j.mvr.2021.1  
 Regulation: NOTCH1 ---> AKT1 35961388 10.1016/j.yexcr.2022.113305  
 Regulation: NOTCH1 ---> AKT1 10.7150/ijbs.71694  
 Regulation: NOTCH1 ---> AKT1 36183290 10.1007/s00018-022-04529-2  
 Regulation: NOTCH1 ---> AKT1 35704163 10.1007/s12033-022-00476-2  
 Expression: PTGS2 ---> CD274 24004819 10.1186/bcr3469  
 Expression: PTGS2 ---> CD274 28096371 10.1073/pnas.161292011410.1073/pnas.161292011  
 Expression: PTGS2 ---> CD274 28096371 10.1073/pnas.161292011410.1073/pnas.161292011  
 Expression: PTGS2 ---> CD274  
 Expression: PTPRD ---> BECN1 33075361 10.1016/j.pharmthera.2020.107707  
 negative Expression: GPER1 ---| F26241029 10.1016/j.jsbmb.2015.07.019  
 negative Expression: GPER1 ---| PTGS2 10.1042/CS20180919  
 negative Expression: GPER1 ---| F30705108 10.1042/CS2018091910.1042/CS20180919  
 negative Expression: GPER1 ---| F26241029 10.1016/j.jsbmb.2015.07.019  
 negative Expression: GPER1 ---| F26241029 10.1016/j.jsbmb.2015.07.019  
 negative Expression: GPER1 ---| PTGS2 10.1016/j.bbrc.2019.05.045  
 negative Expression: GPER1 ---| F28347854 10.1016/j.jsbmb.2017.03.021  
 negative Regulation: CLDN1 ---| c29524521 10.1016/j.bbamcr.2018.03.001  
 negative Regulation: CLDN1 ---| c29524521 10.1016/j.bbamcr.2018.03.001  
 negative Regulation: CLDN1 ---| c32824620 10.3390/ijms21165909  
 negative Regulation: CLDN1 ---| c32824620 10.3390/ijms21165909  
 negative Regulation: CLDN1 ---| c33828978 10.3389/fonc.2021.62087310.3389/fonc.2021.620  
 negative Regulation: ABCC1 ---| c32278855 10.1016/j.ejphar.2020.173105  
 negative Regulation: ABCC1 ---| c21219875 10.1016/j.bcp.2010.12.018  
 negative Regulation: ABCC1 ---| c11864633 10.1016/S0014-2999(02)01267-0  
 negative Regulation: ABCC1 ---| c22771706 10.1016/j.brainres.2012.06.043  
 negative Regulation: ABCC1 ---| c30001527 10.1159/000491659  
 negative Regulation: ABCC1 ---| c31582906 10.1186/s12935-019-0943-6  
 negative Regulation: ABCC1 ---| c34054937 10.1155/2021/5525091  
 negative Regulation: ABCC1 ---| c22460269 10.1038/bjc.2012.81  
 negative Regulation: ABCC1 ---| c23686318 10.1124/dmd.113.052092  
 negative Regulation: ABCC1 ---| c23686318 10.1124/dmd.113.052092  
 negative Regulation: ABCC1 ---| c25895710 10.1007/978-3-319-16537-0\_7  
 negative Regulation: ABCC1 ---| chemosensi10.1186/s12935-019-0943-6  
 negative Regulation: ABCC1 ---| c34510251 10.1007/s00280-021-04337-8

positive Regulation: NGF --> LRF 34073639 10. 3390/i jms22115692  
 positive Regulation: NGF --> LRF 25233900 10. 1186/1471-2202-15-108  
 positive Regulation: NGF --> LRF 25233900 10. 1186/1471-2202-15-10810. 1186/1471-2202-15-  
 positive Expression: IGFBP4 --> 35688891 10. 1038/s41431-022-01129-3  
 negative Regulation: TNFAIP8L2 --30638932 10. 1016/j. bbrc. 2019. 01. 008  
 negative Regulation: TNFAIP8L2 --25912734 10. 1016/j. bbadis. 2015. 04. 018  
 negative Regulation: TNFAIP8L2 --28186089 10. 1038/cgt. 2017. 3  
 negative Regulation: TNFAIP8L2 --29568914 10. 3892/mmr. 2018. 8730  
 negative Regulation: TNFAIP8L2 --30015980 10. 3892/or. 2018. 6576  
 negative Regulation: TNFAIP8L2 --26987289 10. 1038/cgt. 2016. 6  
 negative Regulation: TNFAIP8L2 --26987289 10. 1038/cgt. 2016. 6  
 negative Regulation: TNFAIP8L2 --34702807 10. 1038/s41419-021-04289-0  
 positive Expression: AKT1 --> NC 27816488 10. 1016/j. canlet. 2016. 10. 039  
 positive Expression: AKT1 --> NC 18440314 10. 1016/j. febslet. 2008. 04. 024  
 positive Expression: AKT1 --> NC 18440314 10. 1016/j. febslet. 2008. 04. 024  
 positive Expression: AKT1 --> NC 21338656 10. 1016/j. bbcn. 2011. 02. 001  
 positive Expression: AKT1 --> NC 21338656 10. 1016/j. bbcn. 2011. 02. 001  
 positive Expression: AKT1 --> NC 17920278 10. 1016/j. tibs. 2007. 09. 002  
 positive Expression: AKT1 --> NC 26850133 10. 1016/j. amjsurg. 2015. 11. 029  
 positive Expression: AKT1 --> NC 18924608  
 positive Expression: AKT1 --> NC 17158336  
 positive Expression: AKT1 --> NC 12482957  
 positive Expression: AKT1 --> NC 27348588 10. 1172/JCI80396  
 positive Expression: AKT1 --> NC 28629170 10. 3390/i jms18061295  
 positive Expression: AKT1 --> NC 29857516 10. 3390/i jms19061631  
 positive Expression: AKT1 --> NC 30486896 10. 1186/s13046-018-0972-3  
 positive Expression: AKT1 --> NC 30636930 10. 1186/s12935-018-0714-9  
 positive Expression: AKT1 --> NC 22258620 10. 1038/emboj. 2011. 443  
 positive Expression: AKT1 --> NC 22258620 10. 1038/emboj. 2011. 443  
 positive Expression: AKT1 --> NC 24113181 10. 1038/cddis. 2013. 375

positive Expression: AKT1 --> NC24113181 10.1038/cddis.2013.375  
 positive Expression: AKT1 --> NC21730286 10.1128/MCB.05821-11  
 positive Expression: AKT1 --> NC24113181 10.1038/cddis.2013.37510.1038/cddis.2013.375  
 positive Expression: AKT1 --> NC26117016 10.7534/j.issn.1009-2137.2015.03.01510.7534/j  
 positive Expression: AKT1 --> NC29725418 10.3892/ol.2018.819310.3892/ol.2018.8193  
 positive Expression: AKT1 --> NC33015852 10.1111/fcp.1260810.1111/fcp.12608  
 positive Expression: AKT1 --> NOTCH1 10.1016/j.amjsurg.2015.11.029  
 positive Expression: AKT1 --> NOTCH1 10.1172/JCI80396  
 positive Expression: AKT1 --> NOTCH1 10.1186/s12935-018-0714-9  
 positive Expression: AKT1 --> NC36050315 10.1038/s41419-022-05178-w  
 Regulation: ADCY8 ---> AKT1 26992697 10.1016/j.alcohol.2015.11.008  
 Regulation: ADCY8 ---> AKT1 10.1016/j.alcohol.2015.11.008  
 Expression: RAC1 ---> CD274 29432733 10.1016/j.bbrc.2018.02.073  
 Expression: RAC1 ---> CD274 30544828 10.3390/ijms19123949  
 Expression: RAC1 ---> CD274 26176707 10.1111/pcmr.1239210.1111/pcmr.12392  
 positive Expression: TP53 --> CF22819212 10.1016/j.tem.2012.06.007  
 positive Expression: TP53 --> CF32151151 10.1089/ars.2020.8074  
 positive Expression: TP53 --> CROT  
 positive Regulation: MIR107 --> 27498977 10.3892/ijo.2016.3628  
 positive Regulation: MIR107 --> 27498977 10.3892/ijo.2016.3628  
 positive Regulation: MIR107 --> 33901009 10.18632/aging.202908  
 positive Regulation: MIR107 --> 25400821  
 positive Regulation: MIR107 --> 28979809  
 positive Regulation: MIR107 --> 33901009 10.18632/aging.20290810.18632/aging.202908  
 Expression: TP53 ---> BECN1 33743351 10.1016/j.bbrc.2021.03.034  
 Expression: TP53 ---> BECN1 36567312 10.1186/s12935-022-02831-4  
 Expression: TP53 ---> BECN1 29410006 10.1016/j.canlet.2018.01.061  
 Expression: TP53 ---> BECN1 29775897 10.1016/j.biopha.2018.04.013  
 Expression: TP53 ---> BECN1 29186924 10.3390/ijms18122541  
 Expression: TP53 ---> BECN1 30132535 10.3892/or.2018.6648  
 Expression: TP53 ---> BECN1 34065345 10.3390/ijms22105377  
 Expression: TP53 ---> BECN1 30132535 10.3892/or.2018.664810.3892/or.2018.6648  
 Expression: TP53 ---> BECN1 25208472 10.1111/jcmm.1238610.1111/jcmm.12386  
 negative Expression: PTEN ---| AF29339153 10.1016/j.bbrc.2018.01.061  
 negative Expression: PTEN ---| AF28844858 10.1016/j.cbi.2017.08.014  
 negative Expression: PTEN ---| AF33647255 10.1016/j.ejphar.2021.173983  
 negative Expression: PTEN ---| AF31067440 10.1016/j.yexmp.2019.05.002  
 negative Expression: PTEN ---| AF32919989 10.1016/j.exer.2020.108224  
 negative Expression: PTEN ---| AF32919989 10.1016/j.exer.2020.108224  
 negative Expression: PTEN ---| AF16170201 10.1074/jbc.M504155200  
 negative Expression: PTEN ---| AF16963781 10.1074/jbc.M606450200  
 negative Expression: PTEN ---| AF16963781 10.1074/jbc.M606450200  
 negative Expression: PTEN ---| AF30951746 10.1016/j.lfs.2019.04.001  
 negative Expression: PTEN ---| AF31004658 10.1016/j.lfs.2019.04.040  
 negative Expression: PTEN ---| AF28095306 10.1016/j.taap.2017.01.005

negative Expression: PTEN ---| Af26801100 10.1016/j.dci.2016.01.004  
 negative Expression: PTEN ---| Af32524999 10.1016/j.bbamcr.2020.118770  
 negative Expression: PTEN ---| Af27818223 10.1016/j.tox.2016.11.004  
 negative Expression: PTEN ---| Af32931887 10.1016/j.canlet.2020.09.010  
 negative Expression: PTEN ---| Af29288045 10.1016/j.neulet.2017.12.049  
 negative Expression: PTEN ---| AKT1 10.1016/j.jacc.2014.06.407  
 negative Expression: PTEN ---| Af29807230 10.1016/j.biopha.2018.04.028  
 negative Expression: PTEN ---| Af26459109 10.1016/j.nbd.2015.10.002  
 negative Expression: PTEN ---| Af28306514 10.1016/j.molcel.2017.02.019  
 negative Expression: PTEN ---| Af30195065 10.1016/j.biocel.2018.09.003  
 negative Expression: PTEN ---| AKT1 10.1016/j.pan.2017.05.035  
 negative Expression: PTEN ---| Af30248461 10.1016/j.jprot.2018.09.005  
 negative Expression: PTEN ---| Af28647188 10.1016/j.apjtm.2017.05.007  
 negative Expression: PTEN ---| Af20079711 10.1016/j.bbrc.2010.01.045  
 negative Expression: PTEN ---| Af20163786 10.1016/j.biopsych.2009.12.031  
 negative Expression: PTEN ---| Af21111719 10.1016/j.brainres.2010.11.062  
 negative Expression: PTEN ---| Af17540362 10.1016/j.ydbio.2007.04.051  
 negative Expression: PTEN ---| Af19628092 10.1016/j.surg.2009.04.007  
 negative Expression: PTEN ---| Af18662848 10.1016/j.canlet.2008.06.018  
 negative Expression: PTEN ---| Af18996641 10.1016/j.canlet.2008.09.019  
 negative Expression: PTEN ---| Af22266095 10.1016/j.canlet.2012.01.003  
 negative Expression: PTEN ---| Af21481725 10.1016/j.ijrobp.2010.12.049  
 negative Expression: PTEN ---| Af12946479 10.1016/S0960-7404(03)00037-9  
 negative Expression: PTEN ---| Af22922290 10.1016/j.bbagen.2012.08.006  
 negative Expression: PTEN ---| Af23137704 10.1016/j.febslet.2012.10.034  
 negative Expression: PTEN ---| Af23142288 10.1016/j.canlet.2012.10.037  
 negative Expression: PTEN ---| Af23458710 10.1016/j.neuroscience.2013.02.046  
 negative Expression: PTEN ---| Af23817095 10.1016/j.ijbiomac.2013.06.027  
 negative Expression: PTEN ---| Af25771877 10.1016/j.mrfmmm.2014.08.008  
 negative Expression: PTEN ---| Af19895837 10.1016/j.advenzreg.2009.10.016  
 negative Expression: PTEN ---| Af25907832 10.1016/j.ajpath.2015.01.025  
 negative Expression: PTEN ---| Af25542847 10.1016/j.mce.2014.12.005  
 negative Expression: PTEN ---| Af26253360 10.1016/j.critrevonc.2015.07.005  
 negative Expression: PTEN ---| Af25737250 10.1016/j.biocel.2015.02.015  
 negative Expression: PTEN ---| Af26045339 10.1016/j.molonc.2015.04.014  
 negative Expression: PTEN ---| Af26647161 10.1016/j.survophthal.2015.11.006  
 negative Expression: PTEN ---| Af26647161 10.1016/j.survophthal.2015.11.006  
 negative Expression: PTEN ---| Af21108789  
 negative Expression: PTEN ---| Af19115995  
 negative Expression: PTEN ---| Af16963781  
 negative Expression: PTEN ---| Af16963781  
 negative Expression: PTEN ---| Af16170201  
 negative Expression: PTEN ---| Af14561749  
 negative Expression: PTEN ---| Af19075230  
 negative Expression: PTEN ---| Af18032782  
 negative Expression: PTEN ---| Af16787946  
 negative Expression: PTEN ---| Af14747659  
 negative Expression: PTEN ---| Af10698713  
 negative Expression: PTEN ---| Af20436671  
 negative Expression: PTEN ---| Af18523065  
 negative Expression: PTEN ---| Af26984887 10.1530/ERC-16-0039  
 negative Expression: PTEN ---| Af27572739 10.3892/or.2016.5030  
 negative Expression: PTEN ---| Af27460260 10.1089/scd.2016.0120  
 negative Expression: PTEN ---| Af27465551 10.1007/s13277-016-5155-2

negative Expression: PTEN ---| Af 28289760 10.1007/s00018-017-2500-6  
 negative Expression: PTEN ---| Af 28495999 10.1124/mol.116.108035  
 negative Expression: PTEN ---| Af 28718798 10.3390/ijms18071560  
 negative Expression: PTEN ---| Af 28135838 10.1089/ars.2016.6851  
 negative Expression: PTEN ---| Af 34554926 10.18632/aging.203553  
 negative Expression: PTEN ---| Af 34307670 10.1155/2021/759097610.1155/2021/7590976  
 negative Expression: PTEN ---| Af 18231751 10.1007/s11596-007-0625-910.1007/s11596-007-0  
 negative Expression: PTEN ---| Af 20347952 10.1016/j.exger.2010.03.01510.1016/j.exger.20  
 negative Expression: PTEN ---| Af 21544242 10.1371/journal.pone.001913910.1371/journal.p  
 negative Expression: PTEN ---| Af 22678116 10.1093/carcin/bgs19810.1093/carcin/bgs198  
 negative Expression: PTEN ---| Af 24339862 10.1371/journal.pone.007792210.1371/journal.p  
 negative Expression: PTEN ---| Af 25009983 10.1371/journal.pone.010211810.1371/journal.p  
 negative Expression: PTEN ---| Af 34659902  
 negative Expression: PTEN ---| AKT1 10.1016/j.mrfmmm.2014.08.008  
 negative Expression: PTEN ---| AKT1 10.1016/j.critrevonc.2015.07.005  
 negative Expression: PTEN ---| AKT1 10.1530/ERC-16-0039  
 negative Expression: PTEN ---| Af 29192321 10.3892/or.2017.6099  
 negative Expression: PTEN ---| Af 28733702 10.1007/s10637-017-0494-4  
 negative Expression: PTEN ---| Af 29412697 10.1089/cbr.2017.2306  
 negative Expression: PTEN ---| Af 29412697 10.1089/cbr.2017.2306  
 negative Expression: PTEN ---| Af 29717662 10.1615/CritRevImmunol.2018025184  
 negative Expression: PTEN ---| Af 29687845 10.26355/eurrev-201804-14717  
 negative Expression: PTEN ---| Af 29767245 10.3892/or.2018.6439  
 negative Expression: PTEN ---| AKT1 10.3727/096504017X15061902533715  
 negative Expression: PTEN ---| Af 29713056 10.1038/s41388-018-0261-9  
 negative Expression: PTEN ---| Af 30089904 10.1038/s41586-018-0409-3  
 negative Expression: PTEN ---| Af 29953987 10.1159/000490256  
 negative Expression: PTEN ---| Af 30134988 10.1186/s13046-018-0795-2  
 negative Expression: PTEN ---| Af 29936638 10.1007/s11011-018-0276-5  
 negative Expression: PTEN ---| Af 30106086 10.3892/ijmm.2018.3814  
 negative Expression: PTEN ---| Af 29941984 10.1038/s41434-018-0020-0  
 negative Expression: PTEN ---| Af 30280788 10.26355/eurrev\_201809\_15940  
 negative Expression: PTEN ---| Af 30136167 10.1007/s10571-018-0615-4  
 negative Expression: PTEN ---| Af 30468465 10.26355/eurrev-201811-16256  
 negative Expression: PTEN ---| Af 30338819 10.26355/eurrev\_201810\_16062  
 negative Expression: PTEN ---| Af 30338819 10.26355/eurrev\_201810\_16062  
 negative Expression: PTEN ---| Af 30418964 10.12659/MSM.913307  
 negative Expression: PTEN ---| Af 30418964 10.12659/MSM.913307  
 negative Expression: PTEN ---| Af 30365133 10.3892/or.2018.6823  
 negative Expression: PTEN ---| AKT1 10.1038/s41419-019-1547-8  
 negative Expression: PTEN ---| AKT1 10.26355/eurrev\_201906\_18084  
 negative Expression: PTEN ---| Af 31088038 10.33594/000000101  
 negative Expression: PTEN ---| Af 31173315 10.26355/eurrev\_201905\_1794810.26355/eurrev\_2  
 negative Expression: PTEN ---| Af 30094104  
 negative Expression: PTEN ---| Af 30680530 10.1007/s12079-018-00504-410.1007/s12079-018-  
 negative Expression: PTEN ---| Af 31124340 10.3349/ymj.2019.60.6.561  
 negative Expression: PTEN ---| Af 31415720 10.1139/bcb-2018-036410.1139/bcb-2018-0364  
 negative Expression: PTEN ---| Af 22172720 10.1016/j.ccr.2011.10.030  
 negative Expression: PTEN ---| Af 22549727 10.1101/gad.187252.112  
 negative Expression: PTEN ---| Af 22989520 10.1124/mol.112.081539  
 negative Expression: PTEN ---| Af 21360018 10.1007/s12032-011-9867-2  
 negative Expression: PTEN ---| Af 21360018 10.1007/s12032-011-9867-2  
 negative Expression: PTEN ---| Af 22607099 10.1089/ars.2011.4322  
 negative Expression: PTEN ---| Af 22011761 10.3892/mmr.2011.634

negative Expression: PTEN ---| Af 19728186 10.1007/s12032-009-9295-8  
 negative Expression: PTEN ---| Af 21108789 10.1186/1476-4598-9-305  
 negative Expression: PTEN ---| Af 21492444 10.1186/bcr2865  
 negative Expression: PTEN ---| Af 22298084 10.1007/s00395-012-0248-6  
 negative Expression: PTEN ---| Af 22298084 10.1007/s00395-012-0248-6  
 negative Expression: PTEN ---| Af 22298084 10.1007/s00395-012-0248-6  
 negative Expression: PTEN ---| Af 22796579 10.1161/ATVBAHA.111.241463  
 negative Expression: PTEN ---| Af 23754155 10.3892/jimm.2013.1411  
 negative Expression: PTEN ---| Af 22370645 10.1038/onc.2012.37  
 negative Expression: PTEN ---| Af 20436671 10.1371/journal.pone.0010350  
 negative Expression: PTEN ---| Af 22427991 10.1371/journal.pone.0033211  
 negative Expression: PTEN ---| Af 23144940 10.1371/journal.pone.0048715  
 negative Expression: PTEN ---| Af 23675511 10.1371/journal.pone.0063857  
 negative Expression: PTEN ---| Af 23597193 10.2174/15680096113139990031  
 negative Expression: PTEN ---| Af 24449917 10.1073/pnas.1318185111  
 negative Expression: PTEN ---| Af 24312220 10.1371/journal.pone.0080429  
 negative Expression: PTEN ---| Af 24971153 10.1155/2014/724670  
 negative Expression: PTEN ---| Af 24206455 10.1089/ars.2013.5718  
 negative Expression: PTEN ---| Af 25009983 10.1371/journal.pone.0102118  
 negative Expression: PTEN ---| Af 25009983 10.1371/journal.pone.0102118  
 negative Expression: PTEN ---| Af 25084828 10.1186/s13046-014-0062-0  
 negative Expression: PTEN ---| Af 25600527  
 negative Expression: PTEN ---| Af 25254897 10.1055/s-0034-1385877  
 negative Expression: PTEN ---| Af 21836055 10.1152/ajpgi.00178.2011  
 negative Expression: PTEN ---| Af 25683168 10.3892/or.2015.3804  
 negative Expression: PTEN ---| Af 24854844 10.1159/000358719  
 negative Expression: PTEN ---| Af 21536651 10.1128/MCB.01323-10  
 negative Expression: PTEN ---| Af 25881601 10.4103/0366-6999.155092  
 negative Expression: PTEN ---| Af 26243299 10.1186/s13046-015-0192-z  
 negative Expression: PTEN ---| Af 26390244 10.1038/nm.3955  
 negative Expression: PTEN ---| AKT1 10.1042/CS20150496  
 negative Expression: PTEN ---| Af 26848951 10.1371/journal.pone.0148508  
 negative Expression: PTEN ---| Af 26928575 10.1371/journal.pcbi.1004787  
 negative Expression: PTEN ---| Af 27747225 10.1155/2016/2860516  
 negative Expression: PTEN ---| Af 11875759 10.1086/340026  
 negative Expression: PTEN ---| Af 21627959 10.1016/j.bbrc.2011.05.074  
 negative Expression: PTEN ---| AKT1 10.1016/S0022-5347(01)69142-0  
 negative Expression: PTEN ---| AKT1 10.1097/01.ju.0000067603.56853.0f  
 negative Expression: PTEN ---| Af 20600153 10.1016/j.lfs.2010.06.006  
 negative Expression: PTEN ---| AKT1 10.1016/j.urolonc.2011.03.018  
 negative Expression: PTEN ---| Af 23262204 10.1016/j.ygyno.2012.12.022  
 negative Expression: PTEN ---| Af 22297255 10.1016/j.clml.2011.12.002  
 negative Expression: PTEN ---| Af 23524257 10.1016/j.bbrc.2013.03.018  
 negative Expression: PTEN ---| Af 21795074 10.1016/j.urolonc.2011.03.018  
 negative Expression: PTEN ---| AKT1 10.1016/j.bbamcr.2014.11.004  
 negative Expression: PTEN ---| Af 25447541 10.1016/j.bbamcr.2014.11.004  
 negative Expression: PTEN ---| Af 25440090 10.1016/j.molmed.2014.10.009  
 negative Expression: PTEN ---| Af 19276401  
 negative Expression: PTEN ---| Af 19623194  
 negative Expression: PTEN ---| Af 19039330  
 negative Expression: PTEN ---| Af 11103942  
 negative Expression: PTEN ---| Af 16055704  
 negative Expression: PTEN ---| Af 22505453 10.1172/JCI57477  
 negative Expression: PTEN ---| Af 22962422 10.1210/jc.2012-1991

negative Expression: PTEN ---| Af 20605778 10.1074/jbc.M110.117093  
 negative Expression: PTEN ---| Af 21663495 10.1089/jmf.2010.1428  
 negative Expression: PTEN ---| Af 22556157 10.1165/rcmb.2012-00250Con  
 negative Expression: PTEN ---| Af 20857258 10.1007/s13277-010-0111-z  
 negative Expression: PTEN ---| Af 21637289 10.1038/cdd.2011.73  
 negative Expression: PTEN ---| Af 23419514 10.1038/cr.2013.27  
 negative Expression: PTEN ---| Af 23912224 10.3892/mmr.2013.1612  
 negative Expression: PTEN ---| Af 23909904 10.1089/jmf.2012.2534  
 negative Expression: PTEN ---| Af 23909904 10.1089/jmf.2012.2534  
 negative Expression: PTEN ---| Af 24026200 10.3892/ijmm.2013.1487  
 negative Expression: PTEN ---| Af 22509396 10.1371/journal.pone.0035153  
 negative Expression: PTEN ---| Af 23874880 10.1371/journal.pone.0069104  
 negative Expression: PTEN ---| Af 24312220 10.1371/journal.pone.0080429  
 negative Expression: PTEN ---| Af 24736893 10.3892/mmr.2014.2155  
 negative Expression: PTEN ---| Af 24850856 10.1242/dev.105130  
 negative Expression: PTEN ---| Af 25816150 10.3892/mmr.2015.3509  
 negative Expression: PTEN ---| Af 25816150 10.3892/mmr.2015.3509  
 negative Expression: PTEN ---| Af 25707849 10.3892/mmr.2015.3380  
 negative Expression: PTEN ---| Af 26000878 10.1371/journal.pone.0126149  
 negative Expression: PTEN ---| Af 10958682  
 negative Expression: PTEN ---| Af 15851405  
 negative Expression: PTEN ---| Af 17483362 10.1158/0008-5472.CAN-06-3398  
 negative Expression: PTEN ---| Af 17826033  
 negative Expression: PTEN ---| Af 17983517  
 negative Expression: PTEN ---| Af 19726333  
 negative Expression: PTEN ---| Af 22561258 10.1016/j.yexmp.2012.04.019  
 negative Expression: PTEN ---| Af 22556157 10.1165/rcmb.2012-00250C  
 negative Expression: PTEN ---| Af 22982856 10.1016/j.trim.2012.09.001  
 negative Expression: PTEN ---| Af 24425042 10.3892/mmr.2014.1892  
 negative Expression: PTEN ---| AKT1  
 negative Expression: PTEN ---| Af 26531778 10.3892/or.2015.4375  
 negative Expression: PTEN ---| Af 27004535 10.3892/or.2016.4694  
 negative Expression: PTEN ---| Af 27004535 10.3892/or.2016.4694  
 negative Expression: PTEN ---| Af 27004535 10.3892/or.2016.4694  
 negative Expression: PTEN ---| Af 27955380  
 negative Expression: PTEN ---| Af 1130 10.1016/j.apjtm.2017.05.007  
 negative Expression: PTEN ---| Af 29412697 10.1089/cbr.2017.230610.1089/cbr.2017.2306  
 negative Expression: PTEN ---| Af 30229821 10.26355/eurrev\_201809\_1581010.26355/eurrev\_2  
 negative Expression: PTEN ---| Af 30583634 10.19540/j.cnki.cjcm.20180601.00110.19540/j.  
 negative Expression: PTEN ---| Af 30979496 10.1016/j.bbrc.2019.04.03410.1016/j.bbrc.2019  
 negative Expression: PTEN ---| AKT1 10.3892/or.2020.7457  
 negative Expression: PTEN ---| AKT1 10.12659/MSM.919654  
 negative Expression: PTEN ---| Af 32086725 10.1007/s11011-020-00544-z  
 negative Expression: PTEN ---| AKT1 10.1007/s10528-020-09947-0  
 negative Expression: PTEN ---| AKT1 10.1042/BSR20201901  
 negative Expression: PTEN ---| Af 33670518 10.3390/biom1102030410.3390/biom11020304  
 negative Expression: PTEN ---| Af 33202406 10.1159/000509052  
 negative Expression: PTEN ---| Af 33918290 10.3390/molecules26072029  
 negative Expression: PTEN ---| Af 33867846 10.7150/ijbs.56933  
 negative Expression: PTEN ---| Af 34006834 10.1038/s41419-021-03735-3  
 negative Expression: PTEN ---| Af 33813678 10.1007/s12033-021-00322-x  
 negative Expression: PTEN ---| Af 34135128 10.18632/aging.203154  
 negative Expression: PTEN ---| Af 34344439 10.1186/s13058-021-01457-0  
 negative Expression: PTEN ---| Af 34633595 10.1007/s11011-021-00744-1



|                               |             |                                               |
|-------------------------------|-------------|-----------------------------------------------|
| negative Expression: PTEN --- | AK 34633595 | 10.1007/s11011-021-00744-1                    |
| negative Expression: PTEN --- | AK 34635817 | 10.1038/s41418-021-00861-5                    |
| negative Expression: PTEN --- | AK 34368895 | 10.1007/s00709-021-01695-1                    |
| negative Expression: PTEN --- | AK 35397519 | 10.1186/s12891-022-05266-0                    |
| negative Expression: PTEN --- | AK 35774615 | 10.3389/fphar.2022.90769510.3389/fphar.2022.9 |
| negative Expression: PTEN --- | AKT1        | 10.1016/j.chmed.2022.08.001                   |
| negative Expression: PTEN --- | AK 36217693 | 10.1111/jcpe.13730                            |
| negative Expression: PTEN --- | AK 36381235 | 10.1158/2767-9764.crc-22-0024                 |
| negative Expression: PTEN --- | AK 36330380 | 10.1155/2022/4766992                          |
| negative Expression: PTEN --- | AKT1        | 10.32604/or.2022.026459                       |
| negative Expression: PTEN --- | AK 36547074 | 10.3390/cimb44120413                          |
| negative Expression: PTEN --- | AK 36547074 | 10.3390/cimb44120413                          |
| Expression: AKT1 ---> PTEN    | 31493871    | 10.1016/j.bbrc.2019.08.164                    |
| Expression: AKT1 ---> PTEN    | 28583434    | 10.1016/j.chemphyslip.2017.05.012             |
| Expression: AKT1 ---> PTEN    | 26764128    | 10.1016/j.ydbio.2015.12.027                   |
| Expression: AKT1 ---> PTEN    | 20100827    | 10.1074/jbc.M109.091637                       |
| Expression: AKT1 ---> PTEN    | 25873394    | 10.1074/jbc.M115.641407                       |
| Expression: AKT1 ---> PTEN    | 22184110    | 10.1074/jbc.M111.246397                       |
| Expression: AKT1 ---> PTEN    | 12743124    | 10.1074/jbc.M303318200                        |
| Expression: AKT1 ---> PTEN    | 32610163    | 10.1016/j.lfs.2020.118022                     |
| Expression: AKT1 ---> PTEN    | 28095306    | 10.1016/j.taap.2017.01.005                    |
| Expression: AKT1 ---> PTEN    | 32045588    | 10.1016/j.taap.2020.114918                    |
| Expression: AKT1 ---> PTEN    |             | 10.1016/j.ygyno.2016.04.198                   |
| Expression: AKT1 ---> PTEN    | 32524999    | 10.1016/j.bbamcr.2020.118770                  |
| Expression: AKT1 ---> PTEN    | 32805344    | 10.1016/j.fct.2020.111684                     |
| Expression: AKT1 ---> PTEN    | 29136769    | 10.1016/j.biopha.2017.11.014                  |
| Expression: AKT1 ---> PTEN    | 29567542    | 10.1016/j.biopha.2018.03.088                  |
| Expression: AKT1 ---> PTEN    | 29438745    | 10.1016/j.vascn.2018.02.005                   |
| Expression: AKT1 ---> PTEN    | 33606974    | 10.1016/j.molcel.2021.01.033                  |
| Expression: AKT1 ---> PTEN    | 33606974    | 10.1016/j.molcel.2021.01.033                  |
| Expression: AKT1 ---> PTEN    | 27210502    | 10.1016/j.biocel.2016.05.013                  |
| Expression: AKT1 ---> PTEN    | 28501723    | 10.1016/j.advms.2016.11.011                   |
| Expression: AKT1 ---> PTEN    | 27843613    | 10.1136/esmooopen-2016-000060                 |
| Expression: AKT1 ---> PTEN    | 29514093    | 10.1016/j.celrep.2018.02.044                  |
| Expression: AKT1 ---> PTEN    | 31201145    | 10.1016/j.ebiom.2019.05.055                   |
| Expression: AKT1 ---> PTEN    | 16169518    | 10.1016/j.bbrc.2005.08.256                    |
| Expression: AKT1 ---> PTEN    | 19000654    | 10.1016/j.bbrc.2008.10.157                    |
| Expression: AKT1 ---> PTEN    | 21320485    | 10.1016/j.yexpr.2011.02.003                   |
| Expression: AKT1 ---> PTEN    | 17239858    | 10.1016/j.febslet.2006.12.055                 |
| Expression: AKT1 ---> PTEN    | 17681183    | 10.1053/j.gastro.2007.05.022                  |
| Expression: AKT1 ---> PTEN    | 21756853    | 10.1016/j.jhep.2011.05.023                    |
| Expression: AKT1 ---> PTEN    | 11115729    | 10.1016/S0301-0082(00)00052-6                 |
| Expression: AKT1 ---> PTEN    | 21193018    | 10.1016/j.bbcan.2010.12.002                   |
| Expression: AKT1 ---> PTEN    | 17317031    | 10.1016/j.prp.2007.01.003                     |
| Expression: AKT1 ---> PTEN    | 17826953    | 10.1016/j.celldsig.2007.07.020                |
| Expression: AKT1 ---> PTEN    |             | 10.1016/S0959-437X(99)00041-6                 |
| Expression: AKT1 ---> PTEN    | 16697215    | 10.1016/j.semcancer.2006.03.009               |
| Expression: AKT1 ---> PTEN    | 19962668    | 10.1016/j.ccr.2009.10.014                     |
| Expression: AKT1 ---> PTEN    | 23603119    | 10.1016/j.molcel.2013.03.015                  |
| Expression: AKT1 ---> PTEN    | 24183943    | 10.1016/j.bbcan.2013.10.003                   |
| Expression: AKT1 ---> PTEN    | 24412320    | 10.1016/j.cca.2014.01.001                     |
| Expression: AKT1 ---> PTEN    | 26216598    | 10.1016/j.smim.2015.07.001                    |
| Expression: AKT1 ---> PTEN    | 26774676    | 10.1016/j.cytogfr.2015.12.004                 |
| Expression: AKT1 ---> PTEN    | 20100827    |                                               |

Expression: AKT1 ---> PTEN 19201817  
 Expression: AKT1 ---> PTEN 12743124  
 Expression: AKT1 ---> PTEN 19057511  
 Expression: AKT1 ---> PTEN 27349269 10. 3892/or. 2016. 4907  
 Expression: AKT1 ---> PTEN 26568302 10. 1038/onc. 2015. 402  
 Expression: AKT1 ---> PTEN 26259914 10. 1189/jlb. 4A0415-171RR  
 Expression: AKT1 ---> PTEN 28570839 10. 1089/dna. 2017. 3712  
 Expression: AKT1 ---> PTEN 27758700 10. 2174/1381612822666161018155247  
 Expression: AKT1 ---> PTEN 29207060 10. 3892/mmr. 2017. 8123  
 Expression: AKT1 ---> PTEN 29568880 10. 3892/i jmm. 2018. 3568  
 Expression: AKT1 ---> PTEN 29693151 10. 3892/or. 2018. 6380  
 Expression: AKT1 ---> PTEN 29966227 10. 3390/i jms19071907  
 Expression: AKT1 ---> PTEN 29969760 10. 1159/000491465  
 Expression: AKT1 ---> PTEN 30106086 10. 3892/i jmm. 2018. 3814  
 Expression: AKT1 ---> PTEN 28233182 10. 1007/164\_2017\_4  
 Expression: AKT1 ---> PTEN 30730015 10. 1007/s10620-019-5461-9  
 Expression: AKT1 ---> PTEN 31270502 10. 1038/s41591-019-0499-y  
 Expression: AKT1 ---> PTEN 31524278 10. 3892/or. 2019. 7259  
 Expression: AKT1 ---> PTEN 31511778 10. 1155/2019/4301238  
 Expression: AKT1 ---> PTEN 30733438 10. 1038/s41467-019-08481-x  
 Expression: AKT1 ---> PTEN 32917956 10. 1038/s41388-020-01450-5  
 Expression: AKT1 ---> PTEN 33549103 10. 1186/s12935-021-01793-3  
 Expression: AKT1 ---> PTEN 33843453 10. 1080/19336918. 2021. 1909899  
 Expression: AKT1 ---> PTEN 33843453 10. 1080/19336918. 2021. 1909899  
 Expression: AKT1 ---> PTEN 22552728 10. 3892/mmr. 2012. 889  
 Expression: AKT1 ---> PTEN 22956257 10. 1055/s-0032-1311644  
 Expression: AKT1 ---> PTEN 23223894 10. 1242/jcs. 093765  
 Expression: AKT1 ---> PTEN 23314408 10. 3892/i jo. 2013. 1765  
 Expression: AKT1 ---> PTEN 10. 1016/j. clgc. 2021. 08. 004  
 Expression: AKT1 ---> PTEN 10. 1016/j. clgc. 2021. 08. 004  
 Expression: AKT1 ---> PTEN 32959108 10. 1007/s00403-020-02139-1  
 Expression: AKT1 ---> PTEN 34273059 10. 1007/s11010-021-04221-2  
 Expression: AKT1 ---> PTEN 34402627 10. 1302/2046-3758. 108. BJR-2020-0127. R210. 1302  
 Expression: AKT1 ---> PTEN 18414037 10. 4161/cc. 7. 8. 5753  
 Expression: AKT1 ---> PTEN 21756853 10. 1016/j. jhep. 2011. 05. 02310. 1016/j. jhep. 2011  
 Expression: AKT1 ---> PTEN 21952748 10. 1007/s11010-011-1082-010. 1007/s11010-011-1  
 Expression: AKT1 ---> PTEN 22301279 10. 1093/carcin/bgs02210. 1093/carcin/bgs022  
 Expression: AKT1 ---> PTEN 23129115 10. 1002/jbt. 2145110. 1002/jbt. 21451  
 Expression: AKT1 ---> PTEN 10. 1016/j. ebiom. 2019. 05. 055  
 Expression: AKT1 ---> PTEN 10. 1016/j. bbrc. 2019. 08. 164  
 Expression: AKT1 ---> PTEN 20679434  
 Expression: AKT1 ---> PTEN 10. 1189/jlb. 4A0415-171RR  
 Expression: AKT1 ---> PTEN 10. 1007/s10620-019-5461-9  
 Expression: AKT1 ---> PTEN 10. 1038/s41591-019-0499-y  
 Expression: AKT1 ---> PTEN 10. 3892/or. 2019. 7259  
 Expression: AKT1 ---> PTEN 10. 1155/2019/4301238  
 Expression: AKT1 ---> PTEN 10. 1038/s41467-019-08481-x  
 Expression: AKT1 ---> PTEN 20679434 10. 1083/jcb. 201003004  
 Expression: AKT1 ---> PTEN 20940316 10. 1242/dmm. 004671  
 Expression: AKT1 ---> PTEN 21870170 10. 1007/s12020-011-9524-8

Expression: AKT1 ---> PTEN 23339168 10.1161/HYPERTENSIONAHA.111.00514  
 Expression: AKT1 ---> PTEN 21996732 10.1038/onc.2011.419  
 Expression: AKT1 ---> PTEN 23392169 10.1038/cddis.2013.3  
 Expression: AKT1 ---> PTEN 24025251 10.4161/cbt.26234  
 Expression: AKT1 ---> PTEN 21998680 10.1371/journal.pone.0025676  
 Expression: AKT1 ---> PTEN 24113181 10.1038/cddis.2013.375  
 Expression: AKT1 ---> PTEN 24113181 10.1038/cddis.2013.375  
 Expression: AKT1 ---> PTEN 10.1074/jbc.M114.607846  
 Expression: AKT1 ---> PTEN 25416384 10.1152/ajplung.00242.2014  
 Expression: AKT1 ---> PTEN 23255786 10.1128/JVI.02319-12  
 Expression: AKT1 ---> PTEN 25799148 10.1371/journal.pone.0121547  
 Expression: AKT1 ---> PTEN 25826666 10.1080/15476286.2015.1017205  
 Expression: AKT1 ---> PTEN 10.1691/ph.2015.4853  
 Expression: AKT1 ---> PTEN 10.1074/jbc.M115.641407  
 Expression: AKT1 ---> PTEN 26183061 10.1038/ncomms8769  
 Expression: AKT1 ---> PTEN 26265437 10.1186/s12943-015-0423-0  
 Expression: AKT1 ---> PTEN 26535660 10.4238/2015.October.28.7  
 Expression: AKT1 ---> PTEN 26544868 10.1371/journal.pone.0142373  
 Expression: AKT1 ---> PTEN 10.3233/JAD-150763  
 Expression: AKT1 ---> PTEN 25527506 10.1074/jbc.M114.60784610.1074/jbc.M114.60784  
 Expression: AKT1 ---> PTEN 29725418 10.3892/ol.2018.819310.3892/ol.2018.8193  
 Expression: AKT1 ---> PTEN 21111719 10.1016/j.brainres.2010.11.06210.1016/j.brain  
 Expression: AKT1 ---> PTEN 21297666 10.1038/onc.2011.610.1038/onc.2011.6  
 Expression: AKT1 ---> PTEN 22021428 10.1093/hmg/ddr49110.1093/hmg/ddr491  
 Expression: AKT1 ---> PTEN 31240704 10.1002/1873-3468.1350510.1002/1873-3468.1350  
 Expression: AKT1 ---> PTEN 22869142 10.1038/onc.2012.342  
 Expression: AKT1 ---> PTEN 12077256  
 Expression: AKT1 ---> PTEN 22858201 10.1016/j.nut.2012.03.02010.1016/j.nut.2012.0  
 Expression: AKT1 ---> PTEN 23989801 10.1007/s00395-013-0373-x10.1007/s00395-013-0  
 Expression: AKT1 ---> PTEN 24975844 10.1016/j.cellsig.2014.06.00710.1016/j.cellsi  
 Expression: AKT1 ---> PTEN 25810340 10.1002/path.4538  
 Expression: AKT1 ---> PTEN 26183061 10.1038/ncomms8769  
 Expression: AKT1 ---> PTEN 26535660 10.4238/2015.October.28.7  
 Expression: AKT1 ---> PTEN 21320485 10.1016/j.yexcr.2011.02.003  
 Expression: AKT1 ---> PTEN 20691487 10.1016/j.tibtech.2010.06.005  
 Expression: AKT1 ---> PTEN 17169462 10.1016/j.neuint.2006.10.010  
 Expression: AKT1 ---> PTEN 19057511  
 Expression: AKT1 ---> PTEN 20940316 10.1242/dmm.004671  
 Expression: AKT1 ---> PTEN 20712893 10.1186/1476-4598-9-216  
 Expression: AKT1 ---> PTEN 21709207 10.1161/HYPERTENSIONAHA.111.172189  
 Expression: AKT1 ---> PTEN 23271053 10.1096/fj.12-221994  
 Expression: AKT1 ---> PTEN 25389442 10.1155/2014/628712  
 Expression: AKT1 ---> PTEN 12535639  
 Expression: AKT1 ---> PTEN 26568302 10.1038/onc.2015.402  
 Expression: AKT1 ---> PTEN 10.1042/CS20150405  
 Expression: AKT1 ---> PTEN  
 Expression: AKT1 ---> PTEN 31592121 10.15171/apb.2019.05610.15171/apb.2019.056  
 Expression: AKT1 ---> PTEN 32281513 10.1177/153303382091795910.1177/1533033820917  
 Expression: AKT1 ---> PTEN 32889668 10.1007/s10571-020-00945-9  
 Expression: AKT1 ---> PTEN 32889668 10.1007/s10571-020-00945-9  
 Expression: AKT1 ---> PTEN 34958114 10.3892/or.2021.824810.3892/or.2021.8248  
 Expression: AKT1 ---> PTEN 35408777 10.3390/ijms23073416  
 Expression: AKT1 ---> PTEN 35682571 10.3390/ijms23115892  
 Expression: AKT1 ---> PTEN 36133813 10.3389/fphar.2022.985084

Expression: AKT1 ---> PTEN 35704163 10.1007/s12033-022-00476-2  
Expression: AKT1 ---> PTEN 36402791 10.1038/s41467-022-34831-3  
ProtModification: PTEN ---> AKT1 12010818 10.1182/blood.V99.11.4138  
ProtModification: PTEN ---> AKT1 17142836 10.1074/jbc.M604195200  
ProtModification: PTEN ---> AKT1 26324707 10.1074/jbc.M115.684746  
ProtModification: PTEN ---> AKT1 21953448 10.1074/jbc.M111.270884  
ProtModification: PTEN ---> AKT1 31884408 10.1016/j.ejmech.2019.111972  
ProtModification: PTEN ---> AKT1 33189865 10.1016/j.mce.2020.111080  
ProtModification: PTEN ---> AKT1 33189865 10.1016/j.mce.2020.111080  
ProtModification: PTEN ---> AKT1 29136769 10.1016/j.biopha.2017.11.014  
ProtModification: PTEN ---> AKT1 32201226 10.1016/j.jaut.2020.102440  
ProtModification: PTEN ---> AKT1 15851405 10.1093/annonc/mdi182  
ProtModification: PTEN ---> AKT1 27017291 10.1016/j.ejca.2016.02.016  
ProtModification: PTEN ---> AKT1 31492635 10.1016/j.molcel.2019.08.006  
ProtModification: PTEN ---> AKT1 33098764 10.1016/j.molcel.2020.10.003  
ProtModification: PTEN ---> AKT1 27297622 10.1016/j.biocel.2016.06.006  
ProtModification: PTEN ---> AKT1 29729889 10.1016/j.biocel.2018.04.020  
ProtModification: PTEN ---> AKT1 28578144 10.1016/j.etap.2017.05.013  
ProtModification: PTEN ---> AKT1 32058031 10.1016/j.bbalip.2020.158658  
ProtModification: PTEN ---> AKT1 30598407 10.1016/j.oooo.2018.11.011  
ProtModification: PTEN ---> AKT1 25482988 10.1016/j.jbior.2014.10.004  
ProtModification: PTEN ---> AKT1 19264909 10.2353/ajpath.2009.080460  
ProtModification: PTEN ---> AKT1 20515660 10.1016/j.bbrc.2010.05.140  
ProtModification: PTEN ---> AKT1 22074824 10.1016/j.bbrc.2011.10.120  
ProtModification: PTEN ---> AKT1 22074824 10.1016/j.bbrc.2011.10.120  
ProtModification: PTEN ---> AKT1 20223231 10.1016/j.cca.2010.02.074  
ProtModification: PTEN ---> AKT1 16919259 10.1016/j.ydbio.2006.06.001  
ProtModification: PTEN ---> AKT1 15652487 10.1016/j.cell.2004.12.033  
ProtModification: PTEN ---> AKT1 22244698 10.1016/j.biomaterials.2011.12.051  
ProtModification: PTEN ---> AKT1 20347952 10.1016/j.exger.2010.03.015  
ProtModification: PTEN ---> AKT1 20678571 10.1016/j.freeradbiomed.2010.07.020  
ProtModification: PTEN ---> AKT1 18495460 10.1016/j.jnutbio.2007.12.001  
ProtModification: PTEN ---> AKT1 12946479 10.1016/S0960-7404(03)00037-9  
ProtModification: PTEN ---> AKT1 15172356 10.1016/S1470-2045(04)01492-5  
ProtModification: PTEN ---> AKT1 10.1016/S1535-6108(02)00024-7  
ProtModification: PTEN ---> AKT1 10.1016/S1535-6108(03)00331-3  
ProtModification: PTEN ---> AKT1 20801415 10.1016/j.trsl.2010.06.003  
ProtModification: PTEN ---> AKT1 23403165 10.1016/j.bbcan.2013.01.004  
ProtModification: PTEN ---> AKT1 23458710 10.1016/j.neuroscience.2013.02.046  
ProtModification: PTEN ---> AKT1 24041630 10.1016/j.critrevonc.2013.08.003  
ProtModification: PTEN ---> AKT1 24561200 10.1016/j.febslet.2014.02.005  
ProtModification: PTEN ---> AKT1 24911372 10.1016/j.ajpath.2014.05.004  
ProtModification: PTEN ---> AKT1 25533812 10.1016/j.phrs.2014.12.004  
ProtModification: PTEN ---> AKT1 25721811 10.1016/j.semcd.2015.02.012  
ProtModification: PTEN ---> AKT1 27207584 10.1016/j.yexcr.2016.05.011  
ProtModification: PTEN ---> AKT1 20630061  
ProtModification: PTEN ---> AKT1 18258752  
ProtModification: PTEN ---> AKT1 18258752  
ProtModification: PTEN ---> AKT1 17142836  
ProtModification: PTEN ---> AKT1 10400703  
ProtModification: PTEN ---> AKT1 18268330  
ProtModification: PTEN ---> AKT1 15539459  
ProtModification: PTEN ---> AKT1 15087424  
ProtModification: PTEN ---> AKT1 10988233

ProtModification: PTEN ---> AKT1 17657248  
ProtModification: PTEN ---> AKT1 10435616  
ProtModification: PTEN ---> AKT1 10435616  
ProtModification: PTEN ---> AKT1 11997518  
ProtModification: PTEN ---> AKT1 21253589  
ProtModification: PTEN ---> AKT1 21170325  
ProtModification: PTEN ---> AKT1 20436671  
ProtModification: PTEN ---> AKT1 26563373 10.1007/s13277-015-4392-0  
ProtModification: PTEN ---> AKT1 27793908 10.21873/anticanres.11170  
ProtModification: PTEN ---> AKT1 28289208 10.1073/pnas.1612284114  
ProtModification: PTEN ---> AKT1 28229220 10.1007/s00432-016-2333-y  
ProtModification: PTEN ---> AKT1 28384045 10.1089/gtmb.2016.0281  
ProtModification: PTEN ---> AKT1 28358430 10.3892/mmr.2017.6415  
ProtModification: PTEN ---> AKT1 28358430 10.3892/mmr.2017.6415  
ProtModification: PTEN ---> AKT1 28498467 10.3892/ijo.2017.3982  
ProtModification: PTEN ---> AKT1 28886696 10.1186/s12885-017-3639-0  
ProtModification: PTEN ---> AKT1 29038421 10.1038/s41467-017-00906-9  
ProtModification: PTEN ---> AKT1 29121869 10.1186/s12885-017-3714-6  
ProtModification: PTEN ---> AKT1 28982275 10.1177/1933719117734700  
ProtModification: PTEN ---> AKT1 29463952 10.1155/2017/5458178  
ProtModification: PTEN ---> AKT1 29488607 10.3892/mmr.2018.8640  
ProtModification: PTEN ---> AKT1 30134935 10.1186/s13046-018-0869-1  
ProtModification: PTEN ---> AKT1 31138169 10.1186/s12885-019-5731-0  
ProtModification: PTEN ---> AKT1 31006103 10.1007/s10549-019-05239-3  
ProtModification: PTEN ---> AKT1 30683902 10.1038/s41374-018-0185-6  
ProtModification: PTEN ---> AKT1 30318001 10.2174/1871520618666181012093056  
ProtModification: PTEN ---> AKT1 31929796 10.1155/2019/2902985  
ProtModification: PTEN ---> AKT1 32230887 10.3390/ijms21072322  
ProtModification: PTEN ---> AKT1 32493394 10.1186/s12964-020-00586-x  
ProtModification: PTEN ---> AKT1 33554779 10.1152/AJPENDO.00275.2020  
ProtModification: PTEN ---> AKT1 33554779 10.1152/AJPENDO.00275.2020  
ProtModification: PTEN ---> AKT1 22393246 10.1124/jpet.112.191536  
ProtModification: PTEN ---> AKT1 23023710 10.1172/JCI61269  
ProtModification: PTEN ---> AKT1 22465967 10.1007/s00262-012-1249-x  
ProtModification: PTEN ---> AKT1 10.1038/s41374-018-0185-6  
ProtModification: PTEN ---> AKT1 23239155 10.1164/rccm.201205-08510C  
ProtModification: PTEN ---> AKT1 20795550 10.1007/978-1-4419-6451-9\_15  
ProtModification: PTEN ---> AKT1 21953448 10.1074/jbc.M111.270884  
ProtModification: PTEN ---> AKT1 22233681 10.1017/S1462399411002109  
ProtModification: PTEN ---> AKT1 20630061 10.1186/1471-2407-10-368  
ProtModification: PTEN ---> AKT1 22035408 10.1186/1475-2867-11-36  
ProtModification: PTEN ---> AKT1 22107784 10.1186/1479-5876-9-200  
ProtModification: PTEN ---> AKT1 21263312 10.1097/CAD.0b013e328341ccdd  
ProtModification: PTEN ---> AKT1 21556061 10.1038/ncomms1309  
ProtModification: PTEN ---> AKT1 23970032 10.3892/ijo.2013.2064  
ProtModification: PTEN ---> AKT1 20436671 10.1371/journal.pone.0010350  
ProtModification: PTEN ---> AKT1 21170325 10.1371/journal.pone.0015170  
ProtModification: PTEN ---> AKT1 21253589 10.1371/journal.pone.0015909  
ProtModification: PTEN ---> AKT1 21494560 10.1371/journal.pone.0018702  
ProtModification: PTEN ---> AKT1 22194952 10.1371/journal.pone.0028930  
ProtModification: PTEN ---> AKT1 24113181 10.1038/cddis.2013.375  
ProtModification: PTEN ---> AKT1 24040957 10.1089/ars.2013.5619  
ProtModification: PTEN ---> AKT1 24786832 10.1038/cdd.2014.53  
ProtModification: PTEN ---> AKT1 25677517 10.1161/CIRCRESAHA.116.305348

ProtModification: PTEN ---> AKT1 21421815 10.1152/ajpheart.01138.2010  
 ProtModification: PTEN ---> AKT1 23812635 10.1152/ajplung.00432.2012  
 ProtModification: PTEN ---> AKT1 24651020 10.1515/revneuro-2014-0002  
 ProtModification: PTEN ---> AKT1 25778370 10.1186/s13058-015-0534-y  
 ProtModification: PTEN ---> AKT1 25982630 10.1038/aps.2015.24  
 ProtModification: PTEN ---> AKT1 25825815 10.1210/en.2014-1362  
 ProtModification: PTEN ---> AKT1 10.1074/jbc.M115.684746  
 ProtModification: PTEN ---> AKT1  
 ProtModification: PTEN ---> AKT1 26692175 10.1038/ni.3311  
 ProtModification: PTEN ---> AKT1 259 10.1016/j.ceca.2017.01.003  
 ProtModification: PTEN ---> AKT1 23953228 10.1016/j.humpath.2013.05.014  
 ProtModification: PTEN ---> AKT1 17478730  
 ProtModification: PTEN ---> AKT1 11103942  
 ProtModification: PTEN ---> AKT1 20596601 10.3892/ijmm-00000455  
 ProtModification: PTEN ---> AKT1 21267808 10.1055/s-0030-1250735  
 ProtModification: PTEN ---> AKT1 22364283 10.1042/BJ20112037  
 ProtModification: PTEN ---> AKT1 21874010 10.1038/modpathol.2011.133  
 ProtModification: PTEN ---> AKT1 21874010 10.1038/modpathol.2011.133  
 ProtModification: PTEN ---> AKT1 24736893 10.3892/mmr.2014.2155  
 ProtModification: PTEN ---> AKT1 25333206 10.3892/mmr.2014.2700  
 ProtModification: PTEN ---> AKT1 25234167 10.1038/leu.2014.278  
 ProtModification: PTEN ---> AKT1 27035337 10.3892/mmr.2016.5048  
 ProtModification: PTEN ---> AKT1 26589417 10.1007/s13277-015-4456-1  
 ProtModification: PTEN ---> AKT1 20515660 10.1016/j.bbrc.2010.05.140  
 ProtModification: PTEN ---> AKT1 27634014 10.1152/ajpgi.00292.2016  
 ProtModification: PTEN ---> AKT1 27829222 10.18632/oncotarget.1311310.18632/oncotarget.  
 ProtModification: PTEN ---> AKT1 27829222 10.18632/oncotarget.1311310.18632/oncotarget.  
 ProtModification: PTEN ---> AKT1 17018242 10.1016/j.neuint.2006.08.008  
 ProtModification: PTEN ---> AKT1 23453810 10.1016/j.molcel.2013.01.037  
 ProtModification: PTEN ---> AKT1 23639247 10.1016/j.toxlet.2013.04.018  
 ProtModification: PTEN ---> AKT1 26708722 10.1016/j.bbagrm.2015.12.006  
 ProtModification: PTEN ---> AKT1  
 ProtModification: PTEN ---> AKT1 28259931 10.3892/mmr.2017.6204  
 ProtModification: PTEN ---> AKT1 28358430 10.3892/mmr.2017.6415  
 ProtModification: PTEN ---> AKT1 28524854 10.1038/cdd.2017.73  
 ProtModification: PTEN ---> AKT1 28957811 10.1159/000481648  
 ProtModification: PTEN ---> AKT1 28982275 10.1177/1933719117734700  
 ProtModification: PTEN ---> AKT1 10.1155/2019/2902985  
 ProtModification: PTEN ---> AKT1 34635142 10.1186/s13046-021-02097-0  
 ProtModification: PTEN ---> AKT1 33895342 10.1016/j.neuroscience.2021.04.01010.1016/j.n  
 ProtModification: PTEN ---> AKT1 34998390 10.1186/s12964-021-00805-z  
 ProtModification: PTEN ---> AKT1 34248141 10.1038/s41392-021-00571-x10.1038/s41392-021-  
 ProtModification: PTEN ---> AKT1 36219319 10.1007/s11033-022-07903-2  
 Regulation: TSPAN18 ---> RAC1 35293964 10.1083/jcb.202105147  
 negative MolTransport: PTEN ---| 19910471 10.1074/jbc.M109.075630  
 negative MolTransport: PTEN ---| 26302980 10.1194/jlr.R059154  
 negative MolTransport: PTEN ---| 21756853 10.1016/j.jhep.2011.05.023  
 negative MolTransport: PTEN ---| 23981302 10.1016/j.cellsig.2013.08.005  
 negative MolTransport: PTEN ---| 24680857 10.1016/j.neuroscience.2014.03.039  
 negative MolTransport: PTEN ---| 25857437 10.1016/j.drudis.2015.03.009  
 negative MolTransport: PTEN ---| 19910471

negative MolTransport: PTEN ---| 12869565  
negative MolTransport: PTEN ---| 18566335  
negative MolTransport: PTEN ---| 21873248 10.1073/pnas.1019386108  
negative MolTransport: PTEN ---| 24486596 10.1177/1073858413514634  
negative MolTransport: PTEN ---| 26302980 10.1194/jlr.R059154  
negative MolTransport: PTEN ---| 12869565 10.1074/jbc.M303621200  
negative MolTransport: PTEN ---| AKT1 10.1194/jlr.R059154  
Regulation: BST1 ---> AKT1 24753259 10.1074/jbc.M113.535070  
Regulation: BST1 ---> AKT1 29936181 10.1016/j.imlet.2018.06.007  
Regulation: BST1 ---> AKT1 10.1016/j.cyto.2009.07.552  
Regulation: BST1 ---> AKT1 21478153 10.1074/jbc.M111.227876  
DirectRegulation: UCA1 ---> TP53 26551349 10.1016/j.trsl.2015.10.002  
DirectRegulation: UCA1 ---> TP53 32112905 10.1016/j.canlet.2020.02.003  
DirectRegulation: UCA1 ---> TP53 28738810 10.1186/s12943-017-0699-3  
DirectRegulation: UCA1 ---> TP53 33421618 10.1016/j.semcaner.2020.12.019  
Expression: BECN1 ---> PTGS2 29307663 10.1016/j.biocel.2018.01.002  
Expression: BECN1 ---> PTGS2 24905997 10.4161/auto.28771  
Expression: BECN1 ---> PTGS2 34212828 10.2174/0929867328666210629160647  
Expression: NGF ---> MCL1 10915813 10.1016/S0006-8993(00)02512-9  
Expression: NGF ---> MCL1 27551499 10.1038/cddiscovery.2016.410.1038/cddiscovery  
Expression: SPP1 ---> BECN1 28139205 10.1016/j.atherosclerosis.2017.01.017  
Expression: SPP1 ---> BECN1 10.1016/j.toxlet.2010.03.308  
Expression: SPP1 ---> BECN1 36505285  
positive Regulation: BST1 --> M 21478153 10.1074/jbc.M111.227876  
PromoterBinding: PAX8 ---> AKT1 18202153  
PromoterBinding: PAX8 ---> AKT1 21974806 10.1016/j.canlet.2011.09.010  
negative Expression: AKT1 ---| P 26872612 10.1016/j.mce.2016.02.006  
negative Expression: AKT1 ---| P 26872612 10.1016/j.mce.2016.02.006  
Regulation: CD274 ---> PTGS2 28231855 10.1186/s12967-017-1150-7  
Regulation: CD274 ---> PTGS2 10.1530/ERC-17-0376  
Regulation: CD274 ---> PTGS2 30897754 10.3390/ijms20061405  
Regulation: CD274 ---> PTGS2 28231855 10.1186/s12967-017-1150-710.1186/s12967-017-1  
positive PromoterBinding: TP53 -- 19173293 10.1002/ijc.24221  
positive PromoterBinding: TP53 -- 16778187 10.1158/0008-5472.CAN-06-0772  
positive PromoterBinding: TP53 -- 16061640 10.1158/0008-5472.CAN-04-4184  
positive PromoterBinding: TP53 -- 12917634 10.1038/sj.onc.1206783  
positive PromoterBinding: TP53 -- 10865036 10.1007/s002680010164  
positive PromoterBinding: TP53 -- 15843377 10.1074/jbc.M503026200  
positive PromoterBinding: TP53 -- 19079342 10.1038/onc.2008.451  
positive PromoterBinding: TP53 -- 15016317 10.1111/j.1349-7006.2004.tb02203.x  
positive PromoterBinding: TP53 -- 20554748 10.1093/carcin/bgq123  
positive PromoterBinding: TP53 -- 11729185 10.1074/jbc.M108302200  
positive PromoterBinding: TP53 --> PTEN 10.1016/j.semcaner.2019.02.001  
positive PromoterBinding: TP53 --> PTEN 10.1016/j.bbrc.2012.04.015  
positive PromoterBinding: TP53 --> PTEN 10.1016/S0006-291X(02)02983-2  
positive PromoterBinding: TP53 -- 22290228 10.1016/j.bbrc.2012.01.065  
positive PromoterBinding: TP53 -- 17258789 10.1016/j.humpath.2006.10.007  
positive PromoterBinding: TP53 -- 16545436 10.1016/j.ygyno.2005.12.033  
positive PromoterBinding: TP53 -- 21664656 10.1016/j.ygyno.2011.05.017  
positive PromoterBinding: TP53 -- 16051030 10.1016/j.canlet.2004.12.006  
positive PromoterBinding: TP53 -- 16996682 10.1016/j.canlet.2006.08.007  
positive PromoterBinding: TP53 -- 12217521 10.1016/S0968-0004(02)02166-7  
positive PromoterBinding: TP53 -- 12217521 10.1016/S0968-0004(02)02166-7  
positive PromoterBinding: TP53 -- 11545734 10.1016/S1097-2765(01)00323-9

positive PromoterBinding: TP53 -- 11545734 10.1016/S1097-2765(01)00323-9  
 positive PromoterBinding: TP53 -- 11545734 10.1016/S1097-2765(01)00323-9  
 positive PromoterBinding: TP53 -- 11545734 10.1016/S1097-2765(01)00323-9  
 positive PromoterBinding: TP53 -- 11545734 10.1016/S1097-2765(01)00323-9  
 positive PromoterBinding: TP53 -- 18950730 10.1016/j.biocel.2008.09.022  
 positive PromoterBinding: TP53 -- 18718806 10.1016/j.drug.2008.07.001  
 positive PromoterBinding: TP53 -- 12620407 10.1016/S1535-6108(03)00021-7  
 positive PromoterBinding: TP53 -- 21146147 10.1016/j.trsl.2010.09.004  
 positive PromoterBinding: TP53 -- 22510407 10.1016/j.bbrc.2012.04.015  
 positive PromoterBinding: TP53 -- 23122111 10.1016/j.foodchem.2012.07.112  
 positive PromoterBinding: TP53 -- 25744176 10.1016/j.drudis.2015.02.011  
 positive PromoterBinding: TP53 -- 17998413  
 positive PromoterBinding: TP53 -- 18032782  
 positive PromoterBinding: TP53 -- 15193142  
 positive PromoterBinding: TP53 -- 16495927  
 positive PromoterBinding: TP53 -- 18172008  
 positive PromoterBinding: TP53 -- 18172008  
 positive PromoterBinding: TP53 -- 28301379 10.1097/CAD.0000000000000476  
 positive PromoterBinding: TP53 -- 28301379 10.1097/CAD.0000000000000476  
 positive PromoterBinding: TP53 -- 28301379 10.1097/CAD.0000000000000476  
 positive PromoterBinding: TP53 -- 30217221 10.1186/s13046-018-0898-9  
 positive PromoterBinding: TP53 -- 30486451 10.3390/ijms19123773  
 positive PromoterBinding: TP53 --> PTEN 10.1007/978-981-15-0602-4\_6  
 positive PromoterBinding: TP53 -- 22489661 10.1089/cbr.2011.1154  
 positive PromoterBinding: TP53 -- 20862607 10.1007/s10528-010-9379-3  
 positive PromoterBinding: TP53 -- 21990315 10.1210/en.2011-1207  
 positive PromoterBinding: TP53 -- 22218495 10.3892/ijmm.2012.879  
 positive PromoterBinding: TP53 -- 20736773 10.1097/PGP.0b013e3181de3068  
 positive PromoterBinding: TP53 -- 21297666 10.1038/onc.2011.6  
 positive PromoterBinding: TP53 -- 24083690 10.7314/APJCP.2013.14.8.4485  
 positive PromoterBinding: TP53 -- 24866016 10.1371/journal.pone.0098113  
 positive PromoterBinding: TP53 -- 24905788 10.1146/annurev-biochem-082411-113907  
 positive PromoterBinding: TP53 -- 19079342 10.1038/onc.2008.45110.1038/onc.2008.451  
 positive PromoterBinding: TP53 -- 20554748 10.1093/carcin/bgq12310.1093/carcin/bgq123  
 positive PromoterBinding: TP53 --> PTEN  
 positive PromoterBinding: TP53 -- 19234438  
 positive PromoterBinding: TP53 -- 19173293 10.1002/ijc.24221  
 positive PromoterBinding: TP53 -- 16778187 10.1158/0008-5472.CAN-06-0772  
 positive PromoterBinding: TP53 -- 16061640 10.1158/0008-5472.CAN-04-4184  
 positive PromoterBinding: TP53 -- 12917634 10.1038/sj.onc.1206783  
 positive PromoterBinding: TP53 -- 10865036  
 positive PromoterBinding: TP53 -- 15843377 10.1074/jbc.M503026200  
 positive PromoterBinding: TP53 -- 15016317  
 positive PromoterBinding: TP53 -- 11729185 10.1074/jbc.M108302200  
 positive PromoterBinding: TP53 -- 28602818 10.1016/j.jmb.2017.06.004  
 positive PromoterBinding: TP53 -- 33194023  
 positive PromoterBinding: TP53 -- 32974790 10.1007/s10549-020-05937-3  
 positive QuantitativeChange: hypc33964809 10.1016/j.intimp.2021.107675  
 positive QuantitativeChange: hypc33964809 10.1016/j.intimp.2021.107675  
 positive QuantitativeChange: hypc33964809 10.1016/j.intimp.2021.10767510.1016/j.intimp.  
 Biomarker: hypopharyngeal squamou 32765090 10.2147/CMAR.S25729910.2147/CMAR.S257299  
 Biomarker: hypopharyngeal squamou 33964809 10.1016/j.intimp.2021.10767510.1016/j.intimp.  
 positive QuantitativeChange: hypc27175933 10.3892/mmr.2016.5242  
 negative Expression: ING4 ---| P118789575 10.1016/j.canlet.2008.05.050



negative Expression: ING4 ---| P119903538 10.1016/j.arr.2009.11.001  
 negative Expression: ING4 ---| P122863759 10.1038/cgt.2012.50  
 negative Expression: ING4 ---| P124581166 10.3779/j.issn.1009-3419.2014.02.13  
 negative Expression: ING4 ---| P124581166 10.3779/j.issn.1009-3419.2014.02.1310.3779/j.  
 negative Expression: ING4 ---| P127806345 10.18632/oncotarget.1298410.18632/oncotarget.  
 negative Expression: ING4 ---| P122863759 10.1038/cgt.2012.50  
 negative Expression: ING4 ---| P122863759 10.1038/cgt.2012.50  
 negative Expression: ING4 ---| P130643005 10.1042/BSR20180773  
 negative Expression: ING4 ---| PTGS2 10.1042/BSR20180773  
 positive Expression: NGF --> RAC11278419 10.1074/jbc.M008546200  
 positive Expression: NGF --> RAC11279039 10.1074/jbc.M100254200  
 positive Expression: NGF --> RAC32533921 10.1016/j.devcel.2020.05.020  
 positive Expression: NGF --> RAC21816277 10.1016/j.cell.2011.07.008  
 positive Expression: NGF --> RAC11279039  
 positive Expression: NGF --> RAC11278419  
 positive Expression: NGF --> RAC30522553 10.1691/ph.2018.8726  
 positive Expression: NGF --> RAC30522553 10.1691/ph.2018.872610.1691/ph.2018.8726  
 Regulation: RAI2 ---> chemosensit35299743 10.3389/fonc.2022.80529010.3389/fonc.2022.805  
 Regulation: RAI2 ---> chemosensit35299743 10.3389/fonc.2022.80529010.3389/fonc.2022.805  
 positive Expression: NGF --> PTC25231981 10.1074/jbc.M114.587188  
 positive Expression: NGF --> PTC28844566 10.1016/j.joca.2017.08.006  
 positive Expression: NGF --> PTC10841984 10.1016/S0304-3940(00)01158-7  
 positive Expression: NGF --> PTC11108289  
 positive Expression: NGF --> PTC11108289  
 positive Expression: NGF --> PTC26370988 10.3390/ijms160921759  
 positive Expression: NGF --> PTC28673205 10.1177/1933719117716778  
 positive Expression: NGF --> PTGS2  
 positive Expression: NGF --> PTC23825664 10.1371/journal.pone.0067470  
 positive Expression: NGF --> PTC25231981 10.1074/jbc.M114.587188  
 positive Expression: NGF --> PTGS2 10.1074/jbc.M114.587188  
 positive Expression: NGF --> PTC15145552 10.1016/j.neuint.2003.06.001  
 positive Expression: NGF --> PTC28245631 10.3390/ijms18030507  
 positive Expression: NGF --> PTC9794438  
 positive Expression: NGF --> PTC9794438  
 positive Expression: NGF --> PTC9794438  
 positive Expression: NGF --> PTC12045671  
 positive Expression: NGF --> PTGS2  
 negative Expression: PTGS2 ---| M33857603 10.1016/j.prostaglandins.2021.106550  
 negative Expression: PTGS2 ---| M33857603 10.1016/j.prostaglandins.2021.106550  
 negative Expression: PTGS2 ---| M24993611 10.1016/j.addr.2014.06.009  
 negative Expression: PTGS2 ---| M28668088 10.1186/s12891-017-1648-4  
 negative Expression: PTGS2 ---| M34074169 10.1177/17448069211021252  
 negative Expression: PTGS2 ---| M23574818 10.1097/BRS.0b013e318294edb1

negative Expression: PTGS2 ---| M26656048 10.1097/BRS.0000000000001379  
negative Expression: PTGS2 ---| M16879691 10.1111/j.1464-410X.2006.06207.x  
negative Expression: PTGS2 ---| M28759126 10.1111/sms.1295410.1111/sms.12954  
negative Expression: PTGS2 ---| M26876621 10.1016/j.jos.2016.01.00410.1016/j.jos.2016.0  
negative Expression: PTGS2 ---| NGF 10.1097/BRS.0000000000001379  
negative Expression: PTGS2 ---| M23799042 10.1371/journal.pone.006575110.1371/journal.p  
negative Expression: PTGS2 ---| NGF 10.1097/BRS.0000000000001379  
negative Expression: PTGS2 ---| M19129380  
negative Expression: PTGS2 ---| M10766843  
negative Expression: PTGS2 ---| NGF  
negative Regulation: CD274 ---| c26806807 10.1016/j.canlet.2015.12.006  
negative Regulation: CD274 ---| c30172884 10.1016/j.tranon.2018.08.005  
negative Regulation: CD274 ---| c33073683 10.1177/172460082092617210.1177/1724600820926  
negative Regulation: CD274 ---| c33030957 10.4149/neo\_2020\_200531N589  
positive Expression: BIRC7 --> (25203888 10.1097/SLA.0000000000000916  
PromoterBinding: PPARG ---> MCL1 607 10.1016/j.tim.2018.08.001  
PromoterBinding: PPARG ---> MCL1 29928066 10.1371/journal.ppat.1007100  
PromoterBinding: PPARG ---> MCL1 607 10.1016/j.tim.2018.08.001  
PromoterBinding: PPARG ---> MCL1 29928066 10.1371/journal.ppat.100710010.1371/journal.p  
PromoterBinding: PPARG ---> MCL1 25944662 10.1016/j.bbrc.2015.04.023  
PromoterBinding: PPARG ---> MCL1 10.1016/S1074-7613(04)00030-5  
negative QuantitativeChange: hypc23935917 10.1371/journal.pone.0069038  
negative QuantitativeChange: hypc25923669 10.1371/journal.pone.0126147  
negative Regulation: BIRC7 ---| c20171199 10.1016/j.clinbiochem.2010.02.004  
negative Regulation: BIRC7 ---| c27448305 10.1007/s13277-016-5157-0  
negative Regulation: BIRC7 ---| c27448305 10.1007/s13277-016-5157-0  
negative Regulation: BIRC7 ---| c27448305 10.1007/s13277-016-5157-0  
negative Regulation: BIRC7 ---| c27448305 10.1007/s13277-016-5157-0  
negative Regulation: BIRC7 ---| c27448305 10.1007/s13277-016-5157-0  
negative Regulation: BIRC7 ---| c27448305 10.1007/s13277-016-5157-0  
negative Regulation: BIRC7 ---| c27448305 10.1007/s13277-016-5157-0  
negative Regulation: BIRC7 ---| c27448305 10.1007/s13277-016-5157-0  
negative Regulation: BIRC7 ---| c27448305 10.1007/s13277-016-5157-0  
negative Regulation: BIRC7 ---| c28440463 10.3892/or.2017.5584  
negative Regulation: BIRC7 ---| c28440463 10.3892/or.2017.5584  
negative Regulation: BIRC7 ---| c28440463 10.3892/or.2017.5584  
negative Regulation: BIRC7 ---| c28440463 10.3892/or.2017.5584  
negative Regulation: BIRC7 ---| c28765921 10.3892/or.2017.5866  
negative Regulation: BIRC7 ---| c28765921 10.3892/or.2017.5866  
negative Regulation: BIRC7 ---| c28765921 10.3892/or.2017.5866  
negative Regulation: BIRC7 ---| c31777256 10.4149/neo\_2019\_190106N18  
negative Regulation: BIRC7 ---| c33649820 10.3892/or.2021.7969  
negative Regulation: BIRC7 ---| c33649820 10.3892/or.2021.7969  
negative Regulation: BIRC7 ---| c33649820 10.3892/or.2021.7969  
negative Regulation: BIRC7 ---| c21883015 10.1089/cbr.2011.0962  
negative Regulation: BIRC7 ---| c23632777 10.3892/i jo.2013.1925  
negative Regulation: BIRC7 ---| c23632777 10.3892/i jo.2013.1925  
negative Regulation: BIRC7 ---| c23632777 10.3892/i jo.2013.1925  
negative Regulation: BIRC7 ---| c18340356 10.1038/cgt.2008.1610.1038/cgt.2008.16  
negative Regulation: BIRC7 ---| c23632777 10.3892/i jo.2013.192510.3892/i jo.2013.1925

negative Regulation: BIRC7 ---| c23632777 10.3892/ijo.2013.192510.3892/ijo.2013.1925  
negative Regulation: BIRC7 ---| c25695324 10.3892/mmr.2015.337210.3892/mmr.2015.3372  
negative Regulation: BIRC7 ---| c27448305 10.1007/s13277-016-5157-0  
negative Regulation: BIRC7 ---| c28440463 10.3892/or.2017.558410.3892/or.2017.5584  
negative Regulation: BIRC7 ---| c28765921 10.3892/or.2017.586610.3892/or.2017.5866  
negative Regulation: BIRC7 ---| c31777256 10.4149/neo\_2019\_190106N1810.4149/neo\_2019\_19  
Regulation: TP53 ---> chemosensit34015314 10.1016/j.yexcr.2021.112649  
Regulation: TP53 ---> chemosensit16159878 10.1074/jbc.M507192200  
Regulation: TP53 ---> chemosensit20075077 10.1074/jbc.M109.047985  
Regulation: TP53 ---> chemosensit25112877 10.1074/jbc.M114.594812  
Regulation: TP53 ---> chemosensit15262986 10.1074/jbc.M401530200  
Regulation: TP53 ---> chemosensit12890671 10.1074/jbc.M307149200  
Regulation: TP53 ---> chemosensit12890671 10.1074/jbc.M307149200  
Regulation: TP53 ---> chemosensit31614146 10.1016/j.lfs.2019.116933  
Regulation: TP53 ---> chemosensit27681874 10.1016/j.bbcan.2016.09.006  
Regulation: TP53 ---> chemosensit28755993 10.1016/j.ijpharm.2017.07.056  
Regulation: TP53 ---> chemosensit29494959 10.1016/j.biopha.2018.02.066  
Regulation: TP53 ---> chemosensit33785447 10.1016/j.semcancer.2021.03.010  
Regulation: TP53 ---> chemosensit29615301 10.1016/j.dld.2018.02.009  
Regulation: TP53 ---> chemosensit30898612 10.1016/j.jbior.2019.03.002  
Regulation: TP53 ---> chemosensit33451973 10.1016/j.jbior.2020.100780  
Regulation: TP53 ---> chemosensit21211512 10.1016/j.abb.2010.12.034  
Regulation: TP53 ---> chemosensit15865929 10.1016/j.bbrc.2005.03.153  
Regulation: TP53 ---> chemosensit20233581 10.1016/j.bbrc.2010.03.082  
Regulation: TP53 ---> chemosensitivity 10.1016/S0006-2952(01)00733-X  
Regulation: TP53 ---> chemosensit12694871 10.1016/S0006-2952(03)00078-9  
Regulation: TP53 ---> chemosensit12948852 10.1016/S0006-2952(03)00397-6  
Regulation: TP53 ---> chemosensit17445779 10.1016/j.bcp.2007.03.009  
Regulation: TP53 ---> chemosensit19028473 10.1016/j.cbi.2008.10.048  
Regulation: TP53 ---> chemosensit11435891 10.1016/S0022-5347(05)66150-2  
Regulation: TP53 ---> chemosensitivity 10.1016/S0022-5347(05)67323-5  
Regulation: TP53 ---> chemosensit10379742 10.1097/00005392-199907000-00017  
Regulation: TP53 ---> chemosensit12175703 10.1016/S0024-3205(02)01900-8  
Regulation: TP53 ---> chemosensit12409142 10.1016/S0024-3205(02)02177-X  
Regulation: TP53 ---> chemosensit14761678 10.1016/j.taap.2003.09.011  
Regulation: TP53 ---> chemosensit15891997 10.1016/j.humpath.2005.01.018  
Regulation: TP53 ---> chemosensit12893182 10.1016/S0090-8258(03)00282-8  
Regulation: TP53 ---> chemosensit12893182 10.1016/S0090-8258(03)00282-8  
Regulation: TP53 ---> chemosensit15790436 10.1016/j.ygyno.2004.12.053  
Regulation: TP53 ---> chemosensit15790436 10.1016/j.ygyno.2004.12.053  
Regulation: TP53 ---> chemosensit16380178 10.1016/j.tibtech.2005.12.002  
Regulation: TP53 ---> chemosensit22446689 10.1016/j.jhep.2011.11.029  
Regulation: TP53 ---> chemosensit11557115 10.1016/S0169-5002(01)00230-6  
Regulation: TP53 ---> chemosensit16307839 10.1016/j.fct.2005.10.003  
Regulation: TP53 ---> chemosensit10737712 10.1016/S0304-3835(99)00345-6  
Regulation: TP53 ---> chemosensit10893449 10.1016/S0304-3835(00)00480-8  
Regulation: TP53 ---> chemosensit12880966 10.1016/S0304-3835(03)00088-0  
Regulation: TP53 ---> chemosensit15327837 10.1016/j.canlet.2004.03.044  
Regulation: TP53 ---> chemosensit16023288 10.1016/j.canlet.2005.06.002  
Regulation: TP53 ---> chemosensit16919866 10.1016/j.canlet.2006.06.013  
Regulation: TP53 ---> chemosensit18657356 10.1016/j.canlet.2008.06.006  
Regulation: TP53 ---> chemosensit19467788 10.1016/j.ctrv.2009.04.008  
Regulation: TP53 ---> chemosensit21856084 10.1016/j.mehy.2011.07.052  
Regulation: TP53 ---> chemosensit22353361 10.1016/j.gene.2012.01.099

Regulation: TP53 ---> chemosensit22445862 10.1016/j.tiv.2012.03.004  
Regulation: TP53 ---> chemosensit17875383 10.1016/j.ijom.2007.06.006  
Regulation: TP53 ---> chemosensit17875383 10.1016/j.ijom.2007.06.006  
Regulation: TP53 ---> chemosensit16337111 10.1016/j.colsurfb.2005.10.006  
Regulation: TP53 ---> chemosensit16713222 10.1016/j.phymed.2006.03.009  
Regulation: TP53 ---> chemosensit15691646 10.1016/j.ejca.2004.10.014  
Regulation: TP53 ---> chemosensit16146690 10.1016/j.ejca.2005.04.044  
Regulation: TP53 ---> chemosensit12850529 10.1016/S1040-8428(03)00066-0  
Regulation: TP53 ---> chemosensit16253824 10.1053/j.semtcvs.2005.08.002  
Regulation: TP53 ---> chemosensit19508919 10.1016/j.drudis.2009.03.008  
Regulation: TP53 ---> chemosensit21195657 10.1016/j.drup.2010.12.001  
Regulation: TP53 ---> chemosensit12829013 10.1016/S1471-4914(03)00084-4  
Regulation: TP53 ---> chemosensit12726865 10.1016/S1535-6108(03)00078-3  
Regulation: TP53 ---> chemosensit20832747 10.1016/j.ccr.2010.08.016  
Regulation: TP53 ---> chemosensit17240826 10.1016/j.thorsurg.2006.08.001  
Regulation: TP53 ---> chemosensit23040255 10.1053/j.seminonc.2012.08.003  
Regulation: TP53 ---> chemosensit23313858 10.1016/j.yexcr.2012.12.025  
Regulation: TP53 ---> chemosensit23973262 10.1016/j.canlet.2013.08.028  
Regulation: TP53 ---> chemosensit24462821 10.1016/j.canlet.2014.01.011  
Regulation: TP53 ---> chemosensit25117446 10.1016/j.bbrc.2014.08.014  
Regulation: TP53 ---> chemosensit25220870 10.1016/j.biochi.2014.09.001  
Regulation: TP53 ---> chemosensit25448278 10.1016/j.toxlet.2014.11.016  
Regulation: TP53 ---> chemosensit24681512 10.1016/j.phrs.2014.03.007  
Regulation: TP53 ---> chemosensit24681512 10.1016/j.phrs.2014.03.007  
Regulation: TP53 ---> chemosensit21293058  
Regulation: TP53 ---> chemosensit21293058  
Regulation: TP53 ---> chemosensit11095436  
Regulation: TP53 ---> chemosensit11095436  
Regulation: TP53 ---> chemosensit9768682  
Regulation: TP53 ---> chemosensit9661637  
Regulation: TP53 ---> chemosensit20075077  
Regulation: TP53 ---> chemosensit19055826  
Regulation: TP53 ---> chemosensit17150101  
Regulation: TP53 ---> chemosensit17121812  
Regulation: TP53 ---> chemosensit15262986  
Regulation: TP53 ---> chemosensit12890671  
Regulation: TP53 ---> chemosensit12690107  
Regulation: TP53 ---> chemosensit12615954  
Regulation: TP53 ---> chemosensit12615954  
Regulation: TP53 ---> chemosensit12615954  
Regulation: TP53 ---> chemosensit12615954  
Regulation: TP53 ---> chemosensit9694807  
Regulation: TP53 ---> chemosensit14769944  
Regulation: TP53 ---> chemosensit11583579  
Regulation: TP53 ---> chemosensit11248087  
Regulation: TP53 ---> chemosensit9122197  
Regulation: TP53 ---> chemosensit16755297  
Regulation: TP53 ---> chemosensit15153941  
Regulation: TP53 ---> chemosensit14739942  
Regulation: TP53 ---> chemosensit11791171  
Regulation: TP53 ---> chemosensit11791171  
Regulation: TP53 ---> chemosensit11791171  
Regulation: TP53 ---> chemosensit11791171  
Regulation: TP53 ---> chemosensit11791171

Regulation: TP53 ---> chemosensit10698490  
 Regulation: TP53 ---> chemosensit10471039  
 Regulation: TP53 ---> chemosensit16260623  
 Regulation: TP53 ---> chemosensit20706634  
 Regulation: TP53 ---> chemosensit27329169 10.1007/s10549-016-3869-x  
 Regulation: TP53 ---> chemosensitivity 10.1016/j.omtn.2021.07.022  
 Regulation: TP53 ---> chemosensit21293058 10.1172/JCI4389710.1172/JCI43897  
 Regulation: TP53 ---> chemosensit21364617 10.1038/cddis.2009.1510.1038/cddis.2009.15  
 Regulation: TP53 ---> chemosensit23224642 10.1007/s10072-012-1257-910.1007/s10072-012-1  
 Regulation: TP53 ---> chemosensit25158956 10.1158/1541-7786.MCR-14-017710.1158/1541-778  
 Regulation: TP53 ---> chemosensit21248371 10.18632/aging.100254  
 Regulation: TP53 ---> chemosensit25296977 10.18632/oncotarget.2528  
 Regulation: TP53 ---> chemosensitivity 10.1016/j.jtcms.2022.01.001  
 Regulation: TP53 ---> chemosensit35437704 10.1007/s13577-022-00700-w  
 Regulation: TP53 ---> chemosensit36361682 10.3390/ijms232112893  
 Expression: NOTCH1 ---> TP53 16449526 10.1182/blood-2005-09-3551  
 Expression: NOTCH1 ---> TP53 19376776 10.1074/jbc.M109.002105  
 Expression: NOTCH1 ---> TP53 30336197 10.1016/j.canlet.2018.09.031  
 Expression: NOTCH1 ---> TP53 27888063 10.1016/j.biocel.2016.11.013  
 Expression: NOTCH1 ---> TP53 27888063 10.1016/j.biocel.2016.11.013  
 Expression: NOTCH1 ---> TP53 27888063 10.1016/j.biocel.2016.11.013  
 Expression: NOTCH1 ---> TP53 22673505 10.1016/j.febslet.2012.03.017  
 Expression: NOTCH1 ---> TP53 21723221 10.1053/j.gastro.2011.06.056  
 Expression: NOTCH1 ---> TP53 21723221 10.1053/j.gastro.2011.06.056  
 Expression: NOTCH1 ---> TP53 24140475 10.1016/j.cellsig.2013.09.021  
 Expression: NOTCH1 ---> TP53 24140475 10.1016/j.cellsig.2013.09.021  
 Expression: NOTCH1 ---> TP53 25704190 10.1016/j.clineuro.2015.01.018  
 Expression: NOTCH1 ---> TP53 19376776  
 Expression: NOTCH1 ---> TP53 18049480  
 Expression: NOTCH1 ---> TP53 17186020  
 Expression: NOTCH1 ---> TP53 16341148  
 Expression: NOTCH1 ---> TP53 29857516 10.3390/ijms19061631  
 Expression: NOTCH1 ---> TP53 29717634 10.1089/scd.2017.0260  
 Expression: NOTCH1 ---> TP53 20491628 10.2174/138920310791824039  
 Expression: NOTCH1 ---> TP53 21743969 10.3892/or.2011.1380  
 Expression: NOTCH1 ---> TP53 22065781 10.1073/pnas.1104943108  
 Expression: NOTCH1 ---> TP53 24504124 10.3892/ijo.2014.2286  
 Expression: NOTCH1 ---> TP53 24950189 10.1371/journal.pone.0100359  
 Expression: NOTCH1 ---> TP53  
 Expression: NOTCH1 ---> TP53 25380967 10.1186/1476-4598-13-247  
 Expression: NOTCH1 ---> TP53 15817159 10.1016/j.yexcr.2005.01.015  
 Expression: NOTCH1 ---> TP53 17186020 10.1038/sj.cdd.4402083  
 Expression: NOTCH1 ---> TP53 18359760 10.1093/carcin/bgn07910.1093/carcin/bgn079

Expression: NOTCH1 ---> TP53 19122673 10.1038/aps.2008.1610.1038/aps.2008.16  
 Expression: NOTCH1 ---> TP53 19376776 10.1074/jbc.M109.00210510.1074/jbc.M109.00210  
 Expression: NOTCH1 ---> TP53 21743969 10.3892/or.2011.138010.3892/or.2011.1380  
 Expression: NOTCH1 ---> TP53 31410150 10.3892/etm.2019.776510.3892/etm.2019.7765  
 Expression: NOTCH1 ---> TP53 31497354  
 Expression: NOTCH1 ---> TP53 10.1016/j.febslet.2012.03.017  
 Expression: NOTCH1 ---> TP53 19304334 10.1016/j.jhep.2008.12.032  
 Expression: NOTCH1 ---> TP53 27600900 10.1016/j.coviro.2016.08.011  
 Expression: NOTCH1 ---> TP53 23219912 10.1016/j.cellsig.2012.11.025  
 Expression: NOTCH1 ---> TP53 10.1016/j.bbrc.2014.10.023  
 Expression: NOTCH1 ---> TP53 19376776  
 Expression: NOTCH1 ---> TP53 18049480  
 Expression: NOTCH1 ---> TP53 18049480  
 Expression: NOTCH1 ---> TP53 17186020  
 Expression: NOTCH1 ---> TP53 21084867 10.4161/cbt.10.10.13923  
 Expression: NOTCH1 ---> TP53 22065781 10.1073/pnas.1104943108  
 Expression: NOTCH1 ---> TP53 22065781 10.1073/pnas.1104943108  
 Expression: NOTCH1 ---> TP53 23359069 10.1084/jem.20121527  
 Expression: NOTCH1 ---> TP53 23359069 10.1084/jem.20121527  
 Expression: NOTCH1 ---> TP53 26496776 10.1007/s10495-015-1188-z  
 Expression: NOTCH1 ---> TP53 26985633 10.1080/15384101.2016.1160975  
 Expression: NOTCH1 ---> TP53 21084383 10.1210/me.2010-0248  
 Expression: NOTCH1 ---> TP53 19376776  
 Expression: NOTCH1 ---> TP53 19376776  
 Expression: NOTCH1 ---> TP53 19376776  
 Expression: NOTCH1 ---> TP53 18367647  
 Expression: NOTCH1 ---> TP53 12208848  
 Expression: NOTCH1 ---> TP53 18192969  
 Expression: NOTCH1 ---> TP53 23737838 10.1155/2013/590393  
 Expression: NOTCH1 ---> TP53 22249263 10.1038/onc.2011.589  
 Expression: NOTCH1 ---> TP53 23936265 10.1371/journal.pone.0071213  
 Expression: NOTCH1 ---> TP53 21480340 10.1002/hep.24208  
 Expression: NOTCH1 ---> TP53  
 Expression: NOTCH1 ---> TP53 33874861 10.2174/0929867328666210419123200  
 PromoterBinding: TP53 ---> NOTCH1 28757263 10.1053/j.gastro.2017.06.066  
 PromoterBinding: TP53 ---> NOTCH1 29358327 10.1074/jbc.M117.791145  
 PromoterBinding: TP53 ---> NOTCH1 31102753 10.1016/j.brainresbull.2019.05.009  
 PromoterBinding: TP53 ---> NOTCH1 19103190 10.1016/j.ydbio.2008.11.021  
 PromoterBinding: TP53 ---> NOTCH1 23810012 10.1016/B978-0-12-416673-8.00013-7  
 PromoterBinding: TP53 ---> NOTCH1 17344417  
 PromoterBinding: TP53 ---> NOTCH1 17344417  
 PromoterBinding: TP53 ---> NOTCH1 17344417  
 PromoterBinding: TP53 ---> NOTCH1 17353266  
 PromoterBinding: TP53 ---> NOTCH1 17353266  
 PromoterBinding: TP53 ---> NOTCH1 20442780  
 PromoterBinding: TP53 ---> NOTCH1 29358327 10.1074/jbc.M117.791145  
 PromoterBinding: TP53 ---> NOTCH1 28847161 10.1089/ars.2017.7262  
 PromoterBinding: TP53 ---> NOTCH1 30673937 10.1007/s12272-019-01118-z

PromoterBinding: TP53 ---> NOTCH131689961 10.3390/ijms20215482  
PromoterBinding: TP53 ---> NOTCH122833673 10.1074/jbc.M112.354522  
PromoterBinding: TP53 ---> NOTCH122833673 10.1074/jbc.M112.354522  
PromoterBinding: TP53 ---> NOTCH122833673 10.1074/jbc.M112.354522  
PromoterBinding: TP53 ---> NOTCH122990386 10.4161/cc.22265  
PromoterBinding: TP53 ---> NOTCH121042738 10.3892/or-00001004  
PromoterBinding: TP53 ---> NOTCH121679465 10.1186/bcr2900  
PromoterBinding: TP53 ---> NOTCH122583596 10.1186/1471-2121-13-12  
PromoterBinding: TP53 ---> NOTCH123860128 10.1038/emboj.2013.156  
PromoterBinding: TP53 ---> NOTCH120442780 10.1371/journal.pone.0010369  
PromoterBinding: TP53 ---> NOTCH122833673 10.1074/jbc.M112.35452210.1074/jbc.M112.35452  
PromoterBinding: TP53 ---> NOTCH1 10.1074/jbc.M117.791145  
PromoterBinding: TP53 ---> NOTCH1 10.3390/ijms20215482  
PromoterBinding: TP53 ---> NOTCH123946688 10.4196/kjpp.2013.17.4.291  
PromoterBinding: TP53 ---> NOTCH1  
PromoterBinding: TP53 ---> NOTCH1 10.1016/j.gendis.2022.04.013  
PromoterBinding: TP53 ---> NOTCH1 10.1016/j.gendis.2022.04.013  
PromoterBinding: TP53 ---> NOTCH135617425 10.1073/pnas.2123202119  
positive Expression: MAPK1 --> S18390540 10.1074/jbc.M800668200  
positive Expression: MAPK1 --> S20427276 10.1074/jbc.M110.110312  
positive Expression: MAPK1 --> S20007708 10.1074/jbc.M109.033951  
positive Expression: MAPK1 --> S27794492 10.1016/j.jconrel.2016.10.024  
positive Expression: MAPK1 --> S32707422 10.1016/j.cyto.2020.155193  
positive Expression: MAPK1 --> S18082140 10.1016/j.febslet.2007.12.006  
positive Expression: MAPK1 --> S17544501 10.1016/j.biomaterials.2007.05.007  
positive Expression: MAPK1 --> S14563548 10.1016/S0378-1119(03)00748-0  
positive Expression: MAPK1 --> S20211246 10.1016/j.freeradbiomed.2010.02.022  
positive Expression: MAPK1 --> S20667472 10.1016/j.bbadis.2010.07.010  
positive Expression: MAPK1 --> S21810479 10.1016/j.biocel.2011.07.008  
positive Expression: MAPK1 --> S18242159 10.1016/j.bone.2007.11.019  
positive Expression: MAPK1 --> S20850578 10.1016/j.bone.2010.09.016  
positive Expression: MAPK1 --> S25150530 10.1016/j.archoralbio.2014.07.013  
positive Expression: MAPK1 --> S25986148 10.1016/j.yjmcc.2015.05.006  
positive Expression: MAPK1 --> S26828266 10.1016/j.bbrc.2016.01.142  
positive Expression: MAPK1 --> S15905316  
positive Expression: MAPK1 --> S15905316  
positive Expression: MAPK1 --> S18390540  
positive Expression: MAPK1 --> S15084239  
positive Expression: MAPK1 --> S11278573  
positive Expression: MAPK1 --> S12970113  
positive Expression: MAPK1 --> S12522128  
positive Expression: MAPK1 --> S12234285  
positive Expression: MAPK1 --> S18156195  
positive Expression: MAPK1 --> S28978514 10.1152/ajpregu.00443.2016  
positive Expression: MAPK1 --> S30001635 10.1177/0963689718756070  
positive Expression: MAPK1 --> S29845241 10.3892/mmr.2018.9052  
positive Expression: MAPK1 --> S29917166 10.3892/or.2018.6504  
positive Expression: MAPK1 --> S30587607 10.21873/invivo.11443

positive Expression: MAPK1 --> §31766280 10.3390/ijms20225690  
positive Expression: MAPK1 --> §32924371 10.1515/hsz-2020-0125  
positive Expression: MAPK1 --> §22797927 10.1242/jcs.093005  
positive Expression: MAPK1 --> §21406114 10.1186/1471-2121-12-11  
positive Expression: MAPK1 --> §23744338 10.1007/s13238-013-3003-3  
positive Expression: MAPK1 --> §23781879 10.1089/dna.2013.2070  
positive Expression: MAPK1 --> §24099083 10.1146/annurev-cellbio-101512-122340  
positive Expression: MAPK1 --> §24446436 10.1074/jbc.M113.536300  
positive Expression: MAPK1 --> §21849669 10.1152/ajpcell.00518.2010  
positive Expression: MAPK1 --> §11278573 10.1074/jbc.M009846200  
positive Expression: MAPK1 --> §11716472 10.1006/abbi.2001.2578  
positive Expression: MAPK1 --> §11716472 10.1006/abbi.2001.2578  
positive Expression: MAPK1 --> §12815619 10.1002/dvdy.10319  
positive Expression: MAPK1 --> §16440309 10.1002/jcb.20697  
positive Expression: MAPK1 --> §16604287 10.1007/s00223-005-0231-4  
positive Expression: MAPK1 --> §16778192 10.1158/0008-5472.CAN-05-3735  
positive Expression: MAPK1 --> §18156195 10.1152/ajpheart.00913.2007  
positive Expression: MAPK1 --> §18712054 10.1291/hypres.31.98710.1291/hypres.31.987  
positive Expression: MAPK1 --> §19664780 10.1016/j.jtcvs.2009.06.02410.1016/j.jtcvs.20  
positive Expression: MAPK1 --> §19798549 10.1007/s11010-009-0276-110.1007/s11010-009-0  
positive Expression: MAPK1 --> §20427276 10.1074/jbc.M110.11031210.1074/jbc.M110.11031  
positive Expression: MAPK1 --> §21406114 10.1186/1471-2121-12-1110.1186/1471-2121-12-1  
positive Expression: MAPK1 --> §22588951 10.1007/s12020-012-9675-210.1007/s12020-012-9  
positive Expression: MAPK1 --> §24446436 10.1074/jbc.M113.53630010.1074/jbc.M113.53630  
positive Expression: MAPK1 --> §24530412 10.1016/j.intimp.2014.01.02810.1016/j.intimp.  
positive Expression: MAPK1 --> §25150530 10.1016/j.archoralbio.2014.07.01310.1016/j.ar  
positive Expression: MAPK1 --> §30001635 10.1177/096368971875607010.1177/0963689718756  
positive Expression: MAPK1 --> SPP1 10.21873/invivo.11443  
positive Expression: MAPK1 --> SPP1 10.3390/ijms20225690  
positive Expression: MAPK1 --> SPP1 10.1074/jbc.M113.536300  
positive Expression: MAPK1 --> §19573532 10.1016/j.yjmcc.2009.06.015  
positive Expression: MAPK1 --> §19573532 10.1016/j.yjmcc.2009.06.015  
positive Expression: MAPK1 --> §19664780 10.1016/j.jtcvs.2009.06.024  
positive Expression: MAPK1 --> §19664780 10.1016/j.jtcvs.2009.06.024  
positive Expression: MAPK1 --> §21147284 10.1016/j.bone.2010.12.002  
positive Expression: MAPK1 --> §21147284 10.1016/j.bone.2010.12.002  
positive Expression: MAPK1 --> SPP1 10.1016/j.bone.2012.02.197  
positive Expression: MAPK1 --> §18390540  
positive Expression: MAPK1 --> §18390540  
positive Expression: MAPK1 --> §18390540  
positive Expression: MAPK1 --> §15557322  
positive Expression: MAPK1 --> §15557322  
positive Expression: MAPK1 --> §12920127  
positive Expression: MAPK1 --> §20127409 10.1007/s10741-010-9158-6  
positive Expression: MAPK1 --> §22814749 10.1161/ATVBAHA.112.255216  
positive Expression: MAPK1 --> §22814749 10.1161/ATVBAHA.112.255216  
positive Expression: MAPK1 --> §23744338 10.1007/s13238-013-3003-3



positive Expression: MAPK1 --> §25352086 10.3892/ijmm.2014.1978  
positive Expression: MAPK1 --> §14755545  
positive Expression: MAPK1 --> §14755545  
positive Expression: MAPK1 --> §15557322  
positive Expression: MAPK1 --> §18390540 10.1074/jbc.M800668200  
positive Expression: MAPK1 --> §19358273 10.1002/ijc.24388  
positive Expression: MAPK1 --> §16978937 10.1016/j.bone.2006.07.024  
positive Expression: MAPK1 --> §16978937 10.1016/j.bone.2006.07.024  
positive Expression: MAPK1 --> §24530412 10.1016/j.intimp.2014.01.028  
positive Expression: MAPK1 --> §15084239  
positive Expression: MAPK1 --> §19246678  
positive Expression: MAPK1 --> §15671080  
positive Expression: MAPK1 --> §21406114 10.1186/1471-2121-12-11  
positive Expression: MAPK1 --> §21468757 10.1007/s00726-011-0901-7  
positive Expression: MAPK1 --> §23781879 10.1089/dna.2013.2070  
positive Expression: MAPK1 --> §23233539 10.1152/ajpendo.00460.2012  
positive Expression: MAPK1 --> SPP1  
positive Expression: MAPK1 --> §29138812 10.3892/mmr.2017.8021  
positive Expression: MAPK1 --> §29359350 10.1111/imcb.1201010.1111/imcb.12010  
positive Expression: MAPK1 --> SPP1 10.1074/jbc.M117.807339  
positive Expression: MAPK1 --> §29359350 10.1111/imcb.12010  
positive Expression: MAPK1 --> §29359350 10.1111/imcb.12010  
positive Expression: MAPK1 --> §29694967 10.1159/000489206  
positive Expression: MAPK1 --> §30497779 10.1016/j.bbrc.2018.11.07010.1016/j.bbrc.2018  
positive Expression: MAPK1 --> §34435888 10.1089/ars.2020.8159  
positive Expression: MAPK1 --> §35510038 10.1155/2022/5013622  
positive Regulation: SPP1 --> M#14704150 10.1074/jbc.M310256200  
positive Regulation: SPP1 --> M#15757900 10.1074/jbc.M414204200  
positive Regulation: SPP1 --> M#15247285 10.1074/jbc.M404674200  
positive Regulation: SPP1 --> M#15247285 10.1074/jbc.M404674200  
positive Regulation: SPP1 --> M#15180992 10.1074/jbc.M404907200  
positive Regulation: SPP1 --> M#11278600 10.1074/jbc.M010021200  
positive Regulation: SPP1 --> M#30537505 10.1016/j.ijbiomac.2018.12.075  
positive Regulation: SPP1 --> M#21703197 10.1016/j.jhep.2011.02.036  
positive Regulation: SPP1 --> M#21703197 10.1016/j.jhep.2011.02.036

positive Regulation: SPP1 --> M#28668580 10.1016/j.jhep.2017.06.020  
positive Regulation: SPP1 --> M#27702700 10.1016/j.arr.2016.09.008  
positive Regulation: SPP1 --> M#32339903 10.1016/j.scr.2020.101799  
positive Regulation: SPP1 --> MAPK1 10.1016/j.mgene.2018.05.006  
positive Regulation: SPP1 --> M#20363925 10.2353/ajpath.2010.090810  
positive Regulation: SPP1 --> M#18632157 10.1016/j.molimm.2008.06.008  
positive Regulation: SPP1 --> M#18632157 10.1016/j.molimm.2008.06.008  
positive Regulation: SPP1 --> M#18996613 10.1016/j.lungcan.2008.09.003  
positive Regulation: SPP1 --> M#19857547 10.1016/j.exphem.2009.10.010  
positive Regulation: SPP1 --> M#20211246 10.1016/j.freeradbiomed.2010.02.022  
positive Regulation: SPP1 --> M#16406521 10.1016/j.tcb.2005.12.005  
positive Regulation: SPP1 --> M#11872370 10.1016/S1056-8727(01)00189-1  
positive Regulation: SPP1 --> M#11872370 10.1016/S1056-8727(01)00189-1  
positive Regulation: SPP1 --> M#11872370 10.1016/S1056-8727(01)00189-1  
positive Regulation: SPP1 --> M#12618529  
positive Regulation: SPP1 --> M#15757900  
positive Regulation: SPP1 --> M#15247285  
positive Regulation: SPP1 --> M#15247285  
positive Regulation: SPP1 --> M#15180992  
positive Regulation: SPP1 --> M#14704150  
positive Regulation: SPP1 --> M#11278600  
positive Regulation: SPP1 --> M#10712383  
positive Regulation: SPP1 --> M#18156195  
positive Regulation: SPP1 --> M#24818727 10.1007/978-3-0348-0837-8\_11  
positive Regulation: SPP1 --> M#29415992 10.1038/s41419-017-0226-x

positive Regulation: SPP1 --> M# 20828639 10.1016/j.bone.2010.08.02510.1016/j.bone.2010  
positive Regulation: SPP1 --> M# 29415992 10.1038/s41419-017-0226-x  
positive Regulation: SPP1 --> MAPK1 10.1042/BCJ20170205  
positive Regulation: SPP1 --> M# 30535434 10.3892/ijo.2018.4656  
positive Regulation: SPP1 --> M# 32351594 10.1155/2020/3573240  
positive Regulation: SPP1 --> M# 21713404 10.1007/s11033-011-1128-0  
positive Regulation: SPP1 --> M# 23086356 10.1007/s12013-012-9449-8  
positive Regulation: SPP1 --> M# 23086356 10.1007/s12013-012-9449-8  
positive Regulation: SPP1 --> M# 20874252 10.1089/jir.2010.0082  
positive Regulation: SPP1 --> M# 21467192 10.1210/en.2010-1328  
positive Regulation: SPP1 --> M# 25777876 10.1186/s13054-015-0782-3  
positive Regulation: SPP1 --> M# 25777876 10.1186/s13054-015-0782-3  
positive Regulation: SPP1 --> M# 25777876 10.1186/s13054-015-0782-3  
positive Regulation: SPP1 --> M# 26458814 10.1186/s12943-015-0449-3  
positive Regulation: SPP1 --> M# 26458814 10.1186/s12943-015-0449-3  
positive Regulation: SPP1 --> M# 10712383 10.1161/01.atv.20.3.624  
positive Regulation: SPP1 --> M# 11872370 10.1016/s1056-8727(01)00189-1  
positive Regulation: SPP1 --> M# 14704150 10.1074/jbc.M310256200  
positive Regulation: SPP1 --> M# 15757900 10.1074/jbc.M414204200  
positive Regulation: SPP1 --> M# 18996613 10.1016/j.lungcan.2008.09.00310.1016/j.lungca  
positive Regulation: SPP1 --> M# 19475568 10.1002/jcp.2183510.1002/jcp.21835  
positive Regulation: SPP1 --> M# 19597469 10.1038/onc.2009.18910.1038/onc.2009.189  
positive Regulation: SPP1 --> M# 20056194 10.1016/j.archoralbio.2009.12.00310.1016/j.ar  
positive Regulation: SPP1 --> M# 25208103 10.1097/MIB.00000000000019210.1097/MIB.00000  
positive Regulation: SPP1 --> M# 29415992 10.1038/s41419-017-0226-x10.1038/s41419-017-0  
positive Regulation: SPP1 --> M# 19285028 10.1016/j.bbrc.2009.01.157  
positive Regulation: SPP1 --> M# 18632157 10.1016/j.molimm.2008.06.008  
positive Regulation: SPP1 --> M# 18996613 10.1016/j.lungcan.2008.09.003  
positive Regulation: SPP1 --> M# 20385232 10.1016/j.matbio.2010.04.001  
positive Regulation: SPP1 --> M# 20828639 10.1016/j.bone.2010.08.025  
positive Regulation: SPP1 --> M# 21147284 10.1016/j.bone.2010.12.002  
positive Regulation: SPP1 --> M# 23089492 10.1016/j.humpath.2012.07.007  
positive Regulation: SPP1 --> M# 20868520  
positive Regulation: SPP1 --> M# 15757900  
positive Regulation: SPP1 --> M# 15247285  
positive Regulation: SPP1 --> M# 15180992  
positive Regulation: SPP1 --> M# 14704150  
positive Regulation: SPP1 --> M# 14704150

positive Regulation: SPP1 --> M# 14704150  
 positive Regulation: SPP1 --> M# 14704150  
 positive Regulation: SPP1 --> M# 14704150  
 positive Regulation: SPP1 --> M# 14704150  
 positive Regulation: SPP1 --> M# 14704150  
 positive Regulation: SPP1 --> M# 14704150  
 positive Regulation: SPP1 --> M# 14704150  
 positive Regulation: SPP1 --> M# 14704150  
 positive Regulation: SPP1 --> M# 14704150  
 positive Regulation: SPP1 --> M# 14704150  
 positive Regulation: SPP1 --> M# 15247285  
 positive Regulation: SPP1 --> M# 14704150  
 positive Regulation: SPP1 --> M# 12920127  
 positive Regulation: SPP1 --> M# 20868520 10. 1186/1476-4598-9-260  
 positive Regulation: SPP1 --> M# 23728342 10. 1038/onc. 2013. 184  
 positive Regulation: SPP1 --> M# 24756245 10. 3892/i jo. 2014. 2393  
 positive Regulation: SPP1 --> M# 24756245 10. 3892/i jo. 2014. 2393  
 positive Regulation: SPP1 --> MAPK1 10. 1161/ATVBAHA. 113. 303017  
 positive Regulation: SPP1 --> M# 26063293 10. 3892/i jmm. 2015. 2243  
 positive Regulation: SPP1 --> M# 26099282 10. 3892/mmr. 2015. 3975  
 positive Regulation: SPP1 --> M# 14704150  
 positive Regulation: SPP1 --> M# 16691505  
 positive Regulation: SPP1 --> M# 19597469 10. 1038/onc. 2009. 189  
 positive Regulation: SPP1 --> M# 20868520 10. 1186/1476-4598-9-260  
 positive Regulation: SPP1 --> M# 20868520 10. 1186/1476-4598-9-260  
 positive Regulation: SPP1 --> M# 28716167 10. 2500/ajra. 2017. 31. 4449  
 positive Regulation: SPP1 --> M# 29065446 10. 3390/i jms18102198  
 positive Regulation: SPP1 --> M# 29223704 10. 1016/j. actbio. 2017. 11. 046  
 positive Regulation: SPP1 --> M# 29500465 10. 1038/s41419-018-0391-6  
 positive Regulation: SPP1 --> M# 29500465 10. 1038/s41419-018-0391-6  
 positive Regulation: SPP1 --> M# 33603163 10. 1038/s41388-021-01663-2  
 positive Regulation: SPP1 --> M# 33603163 10. 1038/s41388-021-01663-2  
 positive Regulation: SPP1 --> MAPK1 10. 1530/ERC-20-0517  
 positive Regulation: SPP1 --> M# 33527556 10. 1002/JLB. 2A0220-127R  
 positive Regulation: SPP1 --> M# 34664250 10. 1007/978-3-030-73119-9\_20  
 positive Regulation: SPP1 --> MAPK1  
 positive Regulation: SPP1 --> MAPK1 10. 1016/j. jceh. 2022. 05. 004  
 positive Regulation: SPP1 --> M# 35580963 10. 1136/gut jnl-2022-327099  
 negative Regulation: AKT1 ---| c# 27038543 10. 1016/j. bbrc. 2016. 03. 141  
 negative Regulation: AKT1 ---| c# 27666600 10. 1016/j. bcp. 2016. 09. 022  
 negative Regulation: AKT1 ---| c# 33011222 10. 1016/j. lfs. 2020. 118513  
 negative Regulation: AKT1 ---| c# 26276725 10. 1016/j. canlet. 2015. 08. 004  
 negative Regulation: AKT1 ---| c# 29753186 10. 1016/j. tranon. 2018. 04. 011  
 negative Regulation: AKT1 ---| c# 22387880 10. 1016/j. regpep. 2012. 02. 003

negative Regulation: AKT1 ---| cf20079806 10.1016/j.bbcan.2010.01.002  
negative Regulation: AKT1 ---| cf22208970 10.1016/j.ijrobp.2011.09.040  
negative Regulation: AKT1 ---| cf19651067 10.1016/j.jamcollsurg.2009.03.006  
negative Regulation: AKT1 ---| cf24184201 10.1016/j.biopha.2013.10.003  
negative Regulation: AKT1 ---| cf21108789  
negative Regulation: AKT1 ---| cf19078992  
negative Regulation: AKT1 ---| cf15150572  
negative Regulation: AKT1 ---| cf12373610  
negative Regulation: AKT1 ---| cf27473470 10.1007/s10571-016-0410-z  
negative Regulation: AKT1 ---| cf28440463 10.3892/or.2017.5584  
negative Regulation: AKT1 ---| cf28849180 10.3892/or.2017.5908  
negative Regulation: AKT1 ---| cf28887606 10.1007/s10616-017-0134-z  
negative Regulation: AKT1 ---| cf30594239 10.1186/s40659-018-0205-4  
negative Regulation: AKT1 ---| chemosensitivity  
negative Regulation: AKT1 ---| cf31665911 10.1177/0963689719885083  
negative Regulation: AKT1 ---| cf31665911 10.1177/0963689719885083  
negative Regulation: AKT1 ---| cf32945500 10.3892/or.2020.7710  
negative Regulation: AKT1 ---| cf33499874 10.1186/s13046-021-01854-5  
negative Regulation: AKT1 ---| cf33591948 10.18632/aging.202488  
negative Regulation: AKT1 ---| cf22873219  
negative Regulation: AKT1 ---| cf22873219  
negative Regulation: AKT1 ---| cf20878074 10.3892/ijo-00000778  
negative Regulation: AKT1 ---| cf21444628 10.1124/jpet.111.179663  
negative Regulation: AKT1 ---| cf22312312 10.3390/ijms13011186  
negative Regulation: AKT1 ---| cf21108789 10.1186/1476-4598-9-305  
negative Regulation: AKT1 ---| cf23743572 10.3892/or.2013.2520  
negative Regulation: AKT1 ---| cf23743572 10.3892/or.2013.2520  
negative Regulation: AKT1 ---| cf23743572 10.3892/or.2013.2520  
negative Regulation: AKT1 ---| cf23613505 10.1177/0300060513480920  
negative Regulation: AKT1 ---| cf24232099 10.1038/cddis.2013.450  
negative Regulation: AKT1 ---| cf24232099 10.1038/cddis.2013.450  
negative Regulation: AKT1 ---| cf24255131 10.1074/mcp.M113.034025  
negative Regulation: AKT1 ---| cf24454800 10.1371/journal.pone.0085113  
negative Regulation: AKT1 ---| cf24104394 10.1038/leu.2013.291  
negative Regulation: AKT1 ---| cf24784001 10.1016/j.neo.2014.03.008  
negative Regulation: AKT1 ---| cf24722292 10.1038/cddis.2014.136  
negative Regulation: AKT1 ---| cf25230779 10.3892/or.2014.3488  
negative Regulation: AKT1 ---| cf25230779 10.3892/or.2014.3488  
negative Regulation: AKT1 ---| cf21273759 10.1159/000322986  
negative Regulation: AKT1 ---| cf21597260 10.1159/000322849  
negative Regulation: AKT1 ---| cf26820593 10.3892/or.2016.4590  
negative Regulation: AKT1 ---| cf27220401 10.3892/or.2016.4820  
negative Regulation: AKT1 ---| cf15150572 10.1038/sj.bjc.6601876  
negative Regulation: AKT1 ---| cf18071906 10.1007/s10495-007-0165-6  
negative Regulation: AKT1 ---| cf18224693 10.1002/ijc.2337110.1002/ijc.23371  
negative Regulation: AKT1 ---| cf19375813 10.1016/j.lungcan.2009.03.01510.1016/j.lungca  
negative Regulation: AKT1 ---| cf19625496 10.1158/1535-7163.MCT-09-014810.1158/1535-716  
negative Regulation: AKT1 ---| cf20944098  
negative Regulation: AKT1 ---| cf21273759 10.1159/00032298610.1159/000322986  
negative Regulation: AKT1 ---| cf21597260 10.1159/00032284910.1159/000322849  
negative Regulation: AKT1 ---| cf23530461 10.1111/ced.1213810.1111/ced.12138  
negative Regulation: AKT1 ---| cf23546174 10.3892/mmr.2013.140010.3892/mmr.2013.1400  
negative Regulation: AKT1 ---| cf26629248  
negative Regulation: AKT1 ---| cf27163202 10.1016/j.yexmp.2016.05.00310.1016/j.yexmp.20

negative Regulation: AKT1 ---| cf 27301639 10.1016/j.bbrc.2016.06.05710.1016/j.bbrc.2016  
 negative Regulation: AKT1 ---| cf 31001468 10.3389/fonc.2019.0018510.3389/fonc.2019.0018  
 negative Regulation: AKT1 ---| cf 32945500 10.3892/or.2020.771010.3892/or.2020.7710  
 negative Regulation: AKT1 ---| cf 33876384 10.1007/s12031-021-01832-8  
 negative Regulation: AKT1 ---| cf 34542810 10.1007/s11427-020-1978-4  
 negative Regulation: AKT1 ---| cf 34792179 10.3892/or.2021.8229  
 negative Regulation: AKT1 ---| cf 35257265 10.1007/s10495-022-01718-z10.1007/s10495-022-  
 negative Regulation: AKT1 ---| cf 35354796 10.1038/s41419-022-04727-7  
 negative Regulation: AKT1 ---| cf 33783376 10.1097/CAD.0000000000001074  
 positive Expression: UCA1 --+> AF 33183321 10.1186/s13000-020-01054-3  
 positive ProtModification: MAPK1 11409876 10.1006/bbrc.2001.5043  
 positive ProtModification: MAPK1 10958792 10.1074/jbc.M004267200  
 positive ProtModification: MAPK1 11821415 10.1074/jbc.M111598200  
 positive ProtModification: MAPK1 11546806 10.1074/jbc.M105669200  
 positive ProtModification: MAPK1 14734651 10.1242/jcs.00897  
 positive ProtModification: MAPK1 15078887 10.1074/jbc.M312135200  
 positive ProtModification: MAPK1 10781582 10.1074/jbc.M001020200  
 positive ProtModification: MAPK1 12890671 10.1074/jbc.M307149200  
 positive ProtModification: MAPK1 15116093 10.1038/sj.onc.1207426  
 positive ProtModification: MAPK1 10547071  
 positive ProtModification: MAPK1 --+> TP53  
 positive ProtModification: MAPK1 --+> TP53  
 positive Regulation: TMEM45A --+> 31585906 10.2741/4823  
 Expression: MAPK1 ---> GCLC 29066411 10.1016/j.fct.2017.10.033  
 Expression: MAPK1 ---> GCLC 26424114 10.1016/j.freeradbiomed.2015.08.011  
 Expression: MAPK1 ---> GCLC 28188924 10.1016/j.freeradbiomed.2017.02.016  
 Expression: MAPK1 ---> GCLC 10.1016/S0006-291X(02)00816-1  
 Expression: MAPK1 ---> GCLC 19328227 10.1016/j.freeradbiomed.2009.03.016  
 Expression: MAPK1 ---> GCLC 19328227 10.1016/j.freeradbiomed.2009.03.016  
 Expression: MAPK1 ---> GCLC 19328227 10.1016/j.freeradbiomed.2009.03.016  
 Expression: MAPK1 ---> GCLC 25201354 10.1016/j.tox.2014.09.002  
 Expression: MAPK1 ---> GCLC 22864849 10.1007/s00204-012-0913-410.1007/s00204-012-0  
 Expression: MAPK1 ---> GCLC 26424114 10.1016/j.freeradbiomed.2015.08.01110.1016/j.  
 positive Expression: CYP2J2 --+> 29427791 10.1016/j.freeradbiomed.2018.02.009  
 positive Expression: MAPK1 --+> N20085809 10.1016/j.mod.2010.01.002  
 positive Expression: MAPK1 --+> N29472716 10.1038/s41418-018-0077-8  
 positive Expression: MAPK1 --+> N29472716 10.1038/s41418-018-0077-8  
 positive Expression: MAPK1 --+> N24392017 10.1371/journal.pone.0085502  
 positive Expression: MAPK1 --+> N32792479 10.1038/s41419-020-02873-4  
 positive Expression: MAPK1 --+> N22787275 10.1091/mbc.E12-02-0132  
 positive Expression: MAPK1 --+> N22646022 10.1139/Y2012-053  
 positive Expression: MAPK1 --+> N23566955 10.1016/j.taap.2013.02.017  
 positive Expression: MAPK1 --+> N22455903 10.1016/j.tice.2012.03.001  
 positive Expression: MAPK1 --+> N17643270 10.1016/j.mod.2007.06.004  
 positive Expression: MAPK1 --+> NOTCH1 10.1016/j.tice.2012.03.001  
 positive Expression: MAPK1 --+> N9390685 10.1016/S1074-7613(00)80382-9  
 positive Expression: MAPK1 --+> N22682244 10.1016/j.cell.2012.03.048  
 positive Expression: MAPK1 --+> N16522205  
 positive Expression: MAPK1 --+> N21552419  
 positive Expression: MAPK1 --+> N25723392 10.1371/journal.pone.0119723  
 positive Expression: MAPK1 --+> N25894826 10.1038/nm.3849  
 positive Expression: MAPK1 --+> NOTCH1  
 negative Regulation: GCLC ---| R 31283930 10.1016/j.bcp.2019.07.001  
 positive Expression: CD274 --+> F 31799599 10.1042/BSR20191041

positive Expression: CD274 --> F31799599 10.1042/BSR20191041  
 positive Expression: CD274 --> F31799599 10.1042/BSR2019104110.1042/BSR20191041  
 Regulation: BECN1 ---> CD274 31503548 10.1172/JCI127721  
 Regulation: BECN1 ---> CD274 33323966 10.1038/s41388-020-01592-6  
 Regulation: NGF ---> chemosensiti9831249 10.1016/S0168-0102(98)00060-1  
 Regulation: NGF ---> chemosensiti11164258 10.1016/S0168-0102(00)00201-7  
 Regulation: NGF ---> chemosensiti29875100 10.2337/db17-1306  
 Regulation: NGF ---> chemosensiti21499209 10.1097/MPA.0b013e318214fb77  
 Regulation: NGF ---> chemosensiti7623122  
 Regulation: NGF ---> chemosensiti7623122  
 Regulation: NGF ---> chemosensitivity  
 negative Expression: ING4 ---| CI22842937 10.3892/or.2012.1930  
 negative Expression: ING4 ---| CI22842937 10.3892/or.2012.1930  
 negative Expression: ING4 ---| CI22842937 10.3892/or.2012.1930  
 negative Expression: ING4 ---| CI20707719 10.1089/cbr.2010.0778  
 negative Expression: ING4 ---| CI21988227 10.1089/cbr.2011.1047  
 negative Expression: ING4 ---| CI21052098 10.1038/cgt.2010.67  
 negative Expression: ING4 ---| CI21052098 10.1038/cgt.2010.67  
 negative Expression: ING4 ---| CI21052098 10.1038/cgt.2010.67  
 negative Expression: ING4 ---| CI21660060 10.1038/cgt.2011.31  
 negative Expression: ING4 ---| CI21052098 10.1038/cgt.2010.6710.1038/cgt.2010.67  
 negative Expression: ING4 ---| CI22842937 10.3892/or.2012.193010.3892/or.2012.1930  
 positive DirectRegulation: KDM5B 27584795 10.1038/cddis.2016.26210.1038/cddis.2016.262  
 positive DirectRegulation: KDM5B 25909289 10.18632/oncotarget.3713  
 positive DirectRegulation: KDM5B 30628696 10.3892/mmr.2019.9832  
 positive DirectRegulation: KDM5B 30728054 10.1186/s13046-019-1063-9  
 positive DirectRegulation: KDM5B 27584795 10.1038/cddis.2016.262  
 positive DirectRegulation: KDM5B 27584795 10.1038/cddis.2016.262  
 positive DirectRegulation: KDM5B 27584795 10.1038/cddis.2016.26210.1038/cddis.2016.262  
 positive DirectRegulation: KDM5B 27584795 10.1038/cddis.2016.262  
 positive DirectRegulation: KDM5B 32868382 10.1158/0008-5472.CAN-20-050510.1158/0008-547  
 positive DirectRegulation: KDM5B --> AKT110.3892/mmr.2019.9832  
 positive DirectRegulation: KDM5B --> AKT110.1186/s13046-019-1063-9  
 positive DirectRegulation: KDM5B 35563264 10.3390/ijms23094874  
 Expression: PPARG ---> MCL1 10.1016/S1074-7613(04)00030-5  
 Expression: PPARG ---> MCL1 25944662 10.1016/j.bbrc.2015.04.023  
 Expression: PPARG ---> MCL1 29928066 10.1371/journal.ppat.100710010.1371/journal.p  
 Expression: PPARG ---> MCL1  
 Expression: PPARG ---> MCL1 607 10.1016/j.tim.2018.08.001  
 PromoterBinding: TP53 ---> DST 16343436 10.1016/j.bbrc.2005.11.118  
 PromoterBinding: TP53 ---> DST 15982302  
 PromoterBinding: TP53 ---> DST  
 negative Expression: PAX8 ---| TF14627715 10.1074/jbc.M306824200  
 negative Expression: PAX8 ---| TF10980123 10.1016/S0002-9440(10)64597-X  
 negative Expression: PAX8 ---| TF16904651 10.1016/j.bcp.2006.06.024  
 negative Expression: PAX8 ---| TF9459485 10.1016/S0167-4889(97)00119-5  
 negative Expression: PAX8 ---| TF14627715  
 negative Expression: PAX8 ---| TF11914272  
 negative Expression: PAX8 ---| TF19139719  
 negative Expression: PAX8 ---| TF29379162 10.1038/s41388-017-0040-z  
 negative Expression: PAX8 ---| TF29379162 10.1038/s41388-017-0040-z  
 negative Expression: PAX8 ---| TF29379162 10.1038/s41388-017-0040-z  
 negative Expression: PAX8 ---| TF29379162 10.1038/s41388-017-0040-z  
 negative Expression: PAX8 ---| TF29379162 10.1038/s41388-017-0040-z

negative Expression: PAX8 ---| TF29997452 10.1186/s12935-018-0591-2  
 negative Expression: PAX8 ---| TF21979593 10.1097/PGP.0b013e31821ac6c3  
 negative Expression: PAX8 ---| TF25083965 10.1097/PGP.0b013e3182a54afa  
 negative Expression: PAX8 ---| TF29379162 10.1038/s41388-017-0040-z10.1038/s41388-017-0  
 negative Expression: PAX8 ---| TF34244607 10.1038/s41388-021-01925-z  
 negative Expression: PAX8 ---| TF34244607 10.1038/s41388-021-01925-z  
 negative Expression: PAX8 ---| TF34244607 10.1038/s41388-021-01925-z  
 negative Expression: PAX8 ---| TF34244607 10.1038/s41388-021-01925-z  
 negative Expression: PAX8 ---| TF23868062 10.1038/cddis.2013.262  
 negative Expression: PAX8 ---| TF21876729 10.1371/journal.pone.0022312  
 negative Expression: PAX8 ---| TF23868062 10.1038/cddis.2013.262  
 negative Expression: PAX8 ---| TF29379162 10.1038/s41388-017-0040-z  
 negative Expression: PAX8 ---| TF29379162 10.1038/s41388-017-0040-z  
 negative Expression: PAX8 ---| TP53 10.1016/j.pneurobio.2011.08.012  
 negative Expression: PAX8 ---| TP53  
 positive Regulation: SPP1 --> AF28359791 10.1016/j.bmcl.2017.03.047  
 positive Regulation: SPP1 --> AF29223704 10.1016/j.actbio.2017.11.046  
 positive Regulation: SPP1 --> AF29410240 10.1016/j.jprot.2018.01.017  
 positive Regulation: SPP1 --> AF20363925 10.2353/ajpath.2010.090810  
 positive Regulation: SPP1 --> AF17537408 10.1016/j.bbrc.2007.05.104  
 positive Regulation: SPP1 --> AF17537408 10.1016/j.bbrc.2007.05.104  
 positive Regulation: SPP1 --> AF19285028 10.1016/j.bbrc.2009.01.157  
 positive Regulation: SPP1 --> AF17306792 10.1016/j.yexcr.2006.12.026  
 positive Regulation: SPP1 --> AF19850036 10.1016/j.yexcr.2009.10.012  
 positive Regulation: SPP1 --> AF17977560 10.1016/j.lfs.2007.09.024  
 positive Regulation: SPP1 --> AF18632157 10.1016/j.molimm.2008.06.008  
 positive Regulation: SPP1 --> AF12965255 10.1016/S0165-5728(03)00223-6  
 positive Regulation: SPP1 --> AF21703197 10.1016/j.jhep.2011.02.036  
 positive Regulation: SPP1 --> AF21703197 10.1016/j.jhep.2011.02.036  
 positive Regulation: SPP1 --> AF18996613 10.1016/j.lungcan.2008.09.003  
 positive Regulation: SPP1 --> AF18996613 10.1016/j.lungcan.2008.09.003  
 positive Regulation: SPP1 --> AF21616556 10.1016/j.ejcb.2011.03.005  
 positive Regulation: SPP1 --> AF18694621 10.1016/j.canlet.2008.07.004  
 positive Regulation: SPP1 --> AF22542685 10.1016/j.ijdevneu.2012.04.003  
 positive Regulation: SPP1 --> AF20385232 10.1016/j.matbio.2010.04.001  
 positive Regulation: SPP1 --> AF16406521 10.1016/j.tcb.2005.12.005  
 positive Regulation: SPP1 --> AF16406521 10.1016/j.tcb.2005.12.005  
 positive Regulation: SPP1 --> AF20022267 10.1016/j.urolonc.2009.10.009  
 positive Regulation: SPP1 --> AF22750751 10.1016/j.bbcan.2012.06.005  
 positive Regulation: SPP1 --> AF24657887 10.1016/j.matbio.2014.03.001  
 positive Regulation: SPP1 --> AF24999034 10.1016/j.bbagr.2014.06.020  
 positive Regulation: SPP1 --> AF25749339 10.1016/j.bbrc.2015.02.153  
 positive Regulation: SPP1 --> AF25779039 10.1016/j.brainres.2015.03.015  
 positive Regulation: SPP1 --> AF25779039 10.1016/j.brainres.2015.03.015  
 positive Regulation: SPP1 --> AF26116893 10.1016/j.cca.2015.06.017  
 positive Regulation: SPP1 --> AF25732057 10.1016/j.bbcan.2015.02.003  
 positive Regulation: SPP1 --> AKT1 10.1378/chest.130.4\_MeetingAbstracts.230S-c  
 positive Regulation: SPP1 --> AKT1 10.1378/chest.130.4\_MeetingAbstracts.230S-c  
 positive Regulation: SPP1 --> AF27063991 10.1016/j.lfs.2016.04.003  
 positive Regulation: SPP1 --> AF27063991 10.1016/j.lfs.2016.04.003





positive Regulation: SPP1 --> Af16406521 10.1016/j.tcb.2005.12.005  
positive Regulation: SPP1 --> Af20868520  
positive Regulation: SPP1 --> Af12771144  
positive Regulation: SPP1 --> Af12771144  
positive Regulation: SPP1 --> Af19706414  
positive Regulation: SPP1 --> Af12944477  
positive Regulation: SPP1 --> Af22058329 10.1167/iov.10-7050  
positive Regulation: SPP1 --> Af20868520 10.1186/1476-4598-9-260  
positive Regulation: SPP1 --> Af22444159 10.1186/1756-9966-31-26  
positive Regulation: SPP1 --> Af21273567 10.1161/STROKEAHA.110.599118  
positive Regulation: SPP1 --> Af23508962 10.1074/jbc.M112.432302  
positive Regulation: SPP1 --> Af23630254 10.1073/pnas.1300492110  
positive Regulation: SPP1 --> Af24008322 10.3892/ijmm.2013.1483  
positive Regulation: SPP1 --> Af24008322 10.3892/ijmm.2013.1483  
positive Regulation: SPP1 --> Af24008322 10.3892/ijmm.2013.1483  
positive Regulation: SPP1 --> Af21909361 10.1371/journal.pone.0023831  
positive Regulation: SPP1 --> Af21915300 10.1371/journal.pone.0024217  
positive Regulation: SPP1 --> Af23152823 10.1371/journal.pone.0048933  
positive Regulation: SPP1 --> Af24240095 10.1074/jbc.M113.492314  
positive Regulation: SPP1 --> Af23728336 10.1038/onc.2013.171  
positive Regulation: SPP1 --> Af24714722 10.3892/ijo.2014.2370  
positive Regulation: SPP1 --> Af24714722 10.3892/ijo.2014.2370  
positive Regulation: SPP1 --> Af24714722 10.3892/ijo.2014.2370  
positive Regulation: SPP1 --> Af24810044 10.1038/cddis.2014.174  
positive Regulation: SPP1 --> Af24498111 10.1371/journal.pone.0087464  
positive Regulation: SPP1 --> Af24498111 10.1371/journal.pone.0087464  
positive Regulation: SPP1 --> Af24756245 10.3892/ijo.2014.2393  
positive Regulation: SPP1 --> Af24961145 10.1186/1756-9966-33-53  
positive Regulation: SPP1 --> AKT1 10.1161/ATVBAHA.113.303017  
positive Regulation: SPP1 --> AKT1 10.1530/JOE-14-0203  
positive Regulation: SPP1 --> AKT1 10.1530/JOE-14-0203  
positive Regulation: SPP1 --> AKT1  
positive Regulation: SPP1 --> Af26099282 10.3892/mmr.2015.3975  
positive Regulation: SPP1 --> Af26099282 10.3892/mmr.2015.3975  
positive Regulation: SPP1 --> Af15678124  
positive Regulation: SPP1 --> Af16012053  
positive Regulation: SPP1 --> Af16012053  
positive Regulation: SPP1 --> Af17483319  
positive Regulation: SPP1 --> Af18849546 10.3181/0805-RM-164  
positive Regulation: SPP1 --> Af18849546 10.3181/0805-RM-164  
positive Regulation: SPP1 --> Af18694621 10.1016/j.canlet.2008.07.004  
positive Regulation: SPP1 --> Af18985031 10.1038/mt.2008.235  
positive Regulation: SPP1 --> Af18996613 10.1016/j.lungcan.2008.09.003  
positive Regulation: SPP1 --> Af19597469 10.1038/onc.2009.189  
positive Regulation: SPP1 --> Af19597469 10.1038/onc.2009.189  
positive Regulation: SPP1 --> Af19706414 10.1073/pnas.0903704106  
positive Regulation: SPP1 --> Af19850036 10.1016/j.yexcr.2009.10.012  
positive Regulation: SPP1 --> Af19850036 10.1016/j.yexcr.2009.10.012

positive Regulation: SPP1 --> Af19850036 10.1016/j.yexcr.2009.10.012  
 positive Regulation: SPP1 --> Af19767100 10.1016/j.leukres.2009.08.028  
 positive Regulation: SPP1 --> Af20868520 10.1186/1476-4598-9-260  
 positive Regulation: SPP1 --> Af20868520 10.1186/1476-4598-9-260  
 positive Regulation: SPP1 --> Af21616556 10.1016/j.ejcb.2011.03.005  
 positive Regulation: SPP1 --> Af21909361 10.1371/journal.pone.0023831  
 positive Regulation: SPP1 --> Af25060796 10.1161/ATVBAHA.113.303017  
 positive Regulation: SPP1 --> Af25060796 10.1161/ATVBAHA.113.303017  
 positive Regulation: SPP1 --> Af24714722 10.3892/ijo.2014.2370  
 positive Regulation: SPP1 --> Af25208103 10.1097/MIB.0000000000000192  
 positive Regulation: SPP1 --> Af25352284 10.1530/JOE-14-0203  
 positive Regulation: SPP1 --> Af25817589 10.1016/j.bmc1.2015.03.024  
 positive Regulation: SPP1 --> Af25146847 10.1007/s12035-014-8859-6  
 positive Regulation: SPP1 --> AKT1  
 positive Regulation: SPP1 --> Af26681550 10.1021/acs.jnatprod.5b00796  
 positive Regulation: SPP1 --> Af25146847 10.1007/s12035-014-8859-6  
 positive Regulation: SPP1 --> Af25146847 10.1007/s12035-014-8859-6  
 positive Regulation: SPP1 --> Af28453726 10.1093/cvr/cvx01610.1093/cvr/cvx016  
 positive Regulation: SPP1 --> Af28716167 10.2500/ajra.2017.31.444910.2500/ajra.2017.31  
 positive Regulation: SPP1 --> Af29500465 10.1038/s41419-018-0391-6  
 positive Regulation: SPP1 --> AKT1 10.12659/MSM.905700  
 positive Regulation: SPP1 --> Af28866734 10.1007/s12035-017-0734-9  
 positive Regulation: SPP1 --> Af28866734 10.1007/s12035-017-0734-9  
 positive Regulation: SPP1 --> Af30001635 10.1177/0963689718756070  
 positive Regulation: SPP1 --> AKT1 10.1042/BCJ20170205  
 positive Regulation: SPP1 --> Af30250599 10.3892/ol.2018.928110.3892/ol.2018.9281  
 positive Regulation: SPP1 --> AKT1 10.1128/JVI.02116-17  
 positive Regulation: SPP1 --> AKT1 10.1128/JVI.02116-17  
 positive Regulation: SPP1 --> Af30463876 10.1084/jem.20181211  
 positive Regulation: SPP1 --> Af30483813 10.3892/or.2018.6882  
 positive Regulation: SPP1 --> Af30535434 10.3892/ijo.2018.4656  
 positive Regulation: SPP1 --> AKT1 10.1536/ihj.18-017  
 Regulation: CLDN1 ---> AKT1 23095753 10.1074/jbc.M112.414789  
 Regulation: CLDN1 ---> AKT1 23095753 10.1074/jbc.M112.414789  
 Regulation: CLDN1 ---> AKT1 23095753 10.1074/jbc.M112.414789  
 Regulation: CLDN1 ---> AKT1 23449973 10.1074/jbc.M112.428920  
 Regulation: CLDN1 ---> AKT1 23449973 10.1074/jbc.M112.428920  
 Regulation: CLDN1 ---> AKT1 30518037 10.3390/ijms19123862  
 Regulation: CLDN1 ---> AKT1 30971761 10.1038/s41388-019-0795-5  
 Regulation: CLDN1 ---> AKT1 23095753 10.1074/jbc.M112.414789  
 Regulation: CLDN1 ---> AKT1 23095753 10.1074/jbc.M112.414789  
 Regulation: CLDN1 ---> AKT1 23095753 10.1074/jbc.M112.414789  
 Regulation: CLDN1 ---> AKT1 23449973 10.1074/jbc.M112.428920  
 Regulation: CLDN1 ---> AKT1 23095753 10.1074/jbc.M112.41478910.1074/jbc.M112.41478  
 Regulation: CLDN1 ---> AKT1 10.3390/ijms19123862  
 Regulation: CLDN1 ---> AKT1 26954146 10.5713/ajas.15.041510.5713/ajas.15.0415  
 Regulation: CLDN1 ---> AKT1 10.1038/s41388-019-0795-5  
 Regulation: CLDN1 ---> AKT1 35301287 10.1038/s41420-022-00918-5  
 Regulation: CLDN1 ---> AKT1 34276052 10.1038/s41417-021-00328-2  
 Regulation: CLDN1 ---> AKT1 34276052 10.1038/s41417-021-00328-2  
 Regulation: CLDN1 ---> AKT1 34276052 10.1038/s41417-021-00328-2  
 PromoterBinding: PPARG ---> PTEN 10.1016/S0006-2952(03)00488-X  
 PromoterBinding: PPARG ---> PTEN 22902055 10.1016/j.biopha.2012.04.004  
 PromoterBinding: PPARG ---> PTEN 18032782

PromoterBinding: PPARG ---> PTEN 21990315 10.1210/en.2011-1207  
PromoterBinding: PPARG ---> PTEN 841 10.1016/j.tjog.2016.05.006  
PromoterBinding: PPARG ---> PTEN 841 10.1016/j.tjog.2016.05.006  
PromoterBinding: PPARG ---> PTEN 21489309 10.1186/1465-9921-12-47  
PromoterBinding: PPARG ---> PTEN 25889730 10.1186/s12943-015-0347-8  
PromoterBinding: PPARG ---> PTEN 26674985 10.1038/srep18319 10.1038/srep18319  
PromoterBinding: PPARG ---> PTEN  
PromoterBinding: PPARG ---> PTEN 26861561 10.1007/s13277-016-4919-z  
Expression: AKT1 ---> CLDN1 29524521 10.1016/j.bbamcr.2018.03.001  
Expression: AKT1 ---> CLDN1 29524521 10.1016/j.bbamcr.2018.03.001  
Expression: AKT1 ---> CLDN1 29524521 10.1016/j.bbamcr.2018.03.001  
Expression: AKT1 ---> CLDN1 28993008 10.1016/j.ejcb.2017.09.004  
Expression: AKT1 ---> CLDN1 28498331 10.3390/ijms18051051  
Expression: AKT1 ---> CLDN1 31262888 10.21873/anticanres.13510  
Expression: AKT1 ---> CLDN1 31467400 10.1038/s41598-019-49021-3 10.1038/s41598-019-  
Expression: AKT1 ---> CLDN1 32553076 10.3967/bes2020.04410.3967/bes2020.044  
Expression: AKT1 ---> CLDN1 35568758 10.1007/s00277-022-04867-y  
Expression: NOTCH1 ---> MCL1 28319728 10.1016/j.mib.2017.03.001  
Expression: NOTCH1 ---> MCL1 22249262 10.1038/onc.2011.615  
Expression: NOTCH1 ---> MCL1 23872918 10.1038/cmi.2013.22  
Expression: NOTCH1 ---> MCL1 23872918 10.1038/cmi.2013.22  
Expression: NOTCH1 ---> MCL1 23872918 10.1038/cmi.2013.22  
Expression: NOTCH1 ---> MCL1 25231743 10.1038/leu.2014.276  
Expression: NOTCH1 ---> MCL1 23872918 10.1038/cmi.2013.22 10.1038/cmi.2013.22  
Expression: NOTCH1 ---> MCL1 23872918 10.1038/cmi.2013.22 10.1038/cmi.2013.22  
positive Expression: LRP8 --> CI 33054597 10.1177/0300891620952872  
positive Expression: LRP8 --> CI 36012187 10.3390/ijms23168921  
Expression: PTEN ---> TP53 33667713 10.1016/j.bbrc.2021.02.093  
Expression: PTEN ---> TP53 16728701 10.1182/blood-2006-02-001354  
Expression: PTEN ---> TP53 21873427 10.1074/jbc.M110.217620  
Expression: PTEN ---> TP53 17684018 10.1074/jbc.M703796200  
Expression: PTEN ---> TP53 17684018 10.1074/jbc.M703796200  
Expression: PTEN ---> TP53 12860987 10.1074/jbc.M305135200  
Expression: PTEN ---> TP53 30763577 10.1016/j.lfs.2019.02.021  
Expression: PTEN ---> TP53 26801100 10.1016/j.dci.2016.01.004  
Expression: PTEN ---> TP53 30036566 10.1016/j.bbamcr.2018.07.016  
Expression: PTEN ---> TP53 32172081 10.1016/j.ejmech.2020.112177  
Expression: PTEN ---> TP53 32898647 10.1016/j.biochi.2020.08.021  
Expression: PTEN ---> TP53 31978509 10.1016/j.gene.2020.144353  
Expression: PTEN ---> TP53 32976933 10.1016/j.reprotox.2020.09.006  
Expression: PTEN ---> TP53 29414645 10.1016/j.intimp.2018.01.029  
Expression: PTEN ---> TP53 26579470 10.1016/j.apsb.2015.07.001  
Expression: PTEN ---> TP53 29450148 10.1016/j.biopen.2017.03.005  
Expression: PTEN ---> TP53 20413683 10.2353/ajpath.2010.090571  
Expression: PTEN ---> TP53 15865934 10.1016/j.bbrc.2005.03.183  
Expression: PTEN ---> TP53 19765550 10.1016/j.bcp.2009.09.013  
Expression: PTEN ---> TP53 20858413 10.1016/j.bpj.2010.07.042

|                            |          |                                               |
|----------------------------|----------|-----------------------------------------------|
| Expression: PTEN ---> TP53 | 21040738 | 10.1016/j.mrfmmm.2010.10.007                  |
| Expression: PTEN ---> TP53 | 20018398 | 10.1016/j.lungcan.2009.11.012                 |
| Expression: PTEN ---> TP53 | 22266095 | 10.1016/j.canlet.2012.01.003                  |
| Expression: PTEN ---> TP53 | 22266095 | 10.1016/j.canlet.2012.01.003                  |
| Expression: PTEN ---> TP53 | 18166163 | 10.1016/j.bbcan.2007.12.001                   |
| Expression: PTEN ---> TP53 | 22033326 | 10.1016/j.ejca.2011.09.014                    |
| Expression: PTEN ---> TP53 | 18061438 | 10.1016/j.jsbmb.2007.09.020                   |
| Expression: PTEN ---> TP53 | 14697668 | 10.1016/j.mcn.2003.08.010                     |
| Expression: PTEN ---> TP53 | 14697668 | 10.1016/j.mcn.2003.08.010                     |
| Expression: PTEN ---> TP53 | 16916644 | 10.1016/j.molcel.2006.06.028                  |
| Expression: PTEN ---> TP53 | 16916644 | 10.1016/j.molcel.2006.06.028                  |
| Expression: PTEN ---> TP53 | 16916644 | 10.1016/j.molcel.2006.06.028                  |
| Expression: PTEN ---> TP53 | 16916644 | 10.1016/j.molcel.2006.06.028                  |
| Expression: PTEN ---> TP53 | 21474066 | 10.1016/j.molcel.2011.02.020                  |
| Expression: PTEN ---> TP53 | 12620407 | 10.1016/S1535-6108(03)00021-7                 |
| Expression: PTEN ---> TP53 | 12620407 | 10.1016/S1535-6108(03)00021-7                 |
| Expression: PTEN ---> TP53 | 12620407 | 10.1016/S1535-6108(03)00021-7                 |
| Expression: PTEN ---> TP53 | 12620407 | 10.1016/S1535-6108(03)00021-7                 |
| Expression: PTEN ---> TP53 | 12620407 | 10.1016/S1535-6108(03)00021-7                 |
| Expression: PTEN ---> TP53 | 12620407 | 10.1016/S1535-6108(03)00021-7                 |
| Expression: PTEN ---> TP53 | 12620407 | 10.1016/S1535-6108(03)00021-7                 |
| Expression: PTEN ---> TP53 | 12620407 | 10.1016/S1535-6108(03)00021-7                 |
| Expression: PTEN ---> TP53 | 12620407 | 10.1016/S1535-6108(03)00021-7                 |
| Expression: PTEN ---> TP53 | 12620407 | 10.1016/S1535-6108(03)00021-7                 |
| Expression: PTEN ---> TP53 | 12620407 | 10.1016/S1535-6108(03)00021-7                 |
| Expression: PTEN ---> TP53 | 12620407 | 10.1016/S1535-6108(03)00021-7                 |
| Expression: PTEN ---> TP53 | 12620402 | 10.1016/S1535-6108(03)00022-9                 |
| Expression: PTEN ---> TP53 | 16697957 | 10.1016/j.ccr.2006.03.031                     |
| Expression: PTEN ---> TP53 | 21040901 | 10.1016/j.stem.2010.09.015                    |
| Expression: PTEN ---> TP53 | 21040901 | 10.1016/j.stem.2010.09.015                    |
| Expression: PTEN ---> TP53 | 23123091 | 10.1016/j.febslet.2012.10.036                 |
| Expression: PTEN ---> TP53 | 23123091 | 10.1016/j.febslet.2012.10.036                 |
| Expression: PTEN ---> TP53 | 24607404 | 10.1016/j.stem.2014.02.008                    |
| Expression: PTEN ---> TP53 | 24739178 | 10.1016/j.bpj.2014.02.032                     |
| Expression: PTEN ---> TP53 | 24818748 | 10.1016/j.tibs.2014.04.004                    |
| Expression: PTEN ---> TP53 | 26655093 | 10.1016/j.arr.2015.12.001                     |
| Expression: PTEN ---> TP53 | 18174288 |                                               |
| Expression: PTEN ---> TP53 | 17684018 |                                               |
| Expression: PTEN ---> TP53 | 17684018 |                                               |
| Expression: PTEN ---> TP53 | 15090541 |                                               |
| Expression: PTEN ---> TP53 | 15090541 |                                               |
| Expression: PTEN ---> TP53 | 12860987 |                                               |
| Expression: PTEN ---> TP53 | 19099539 |                                               |
| Expression: PTEN ---> TP53 | 19234438 |                                               |
| Expression: PTEN ---> TP53 | 17962806 |                                               |
| Expression: PTEN ---> TP53 | 18391023 |                                               |
| Expression: PTEN ---> TP53 | 18391023 |                                               |
| Expression: PTEN ---> TP53 | 18332125 |                                               |
| Expression: PTEN ---> TP53 | 18332125 |                                               |
| Expression: PTEN ---> TP53 | 18332125 |                                               |
| Expression: PTEN ---> TP53 | 16055704 |                                               |
| Expression: PTEN ---> TP53 | 27033080 | 10.1007/978-1-4939-3299-3_15                  |
| Expression: PTEN ---> TP53 | 28677502 | 10.2174/1381612823666170704124611             |
| Expression: PTEN ---> TP53 | 29103158 | 10.1007/s00432-017-2537-9                     |
| Expression: PTEN ---> TP53 |          | 10.3390/ijsms22189838                         |
| Expression: PTEN ---> TP53 | 33667713 | 10.1016/j.bbrc.2021.02.09310.1016/j.bbrc.2021 |

Expression: PTEN ---> TP53 34504554 10.3892/etm.2021.1053410.3892/etm.2021.10534  
 Expression: PTEN ---> TP53 18363844 10.1111/j.1582-4934.2008.00311.x10.1111/j.158  
 Expression: PTEN ---> TP53 20926450 10.1093/hmg/ddq43410.1093/hmg/ddq434  
 Expression: PTEN ---> TP53 10.1016/j.bpj.2010.07.042  
 Expression: PTEN ---> TP53 10.1016/j.ejca.2011.09.014  
 Expression: PTEN ---> TP53 10.1016/j.mcn.2003.08.010  
 Expression: PTEN ---> TP53 10.1016/j.mcn.2003.08.010  
 Expression: PTEN ---> TP53 10.1016/j.apsb.2015.07.001  
 Expression: PTEN ---> TP53 29103158 10.1007/s00432-017-2537-9  
 Expression: PTEN ---> TP53 29209894 10.1007/s10863-017-9737-5  
 Expression: PTEN ---> TP53 29488607 10.3892/mmr.2018.8640  
 Expression: PTEN ---> TP53 30095997 10.1152/ajpheart.00121.2018  
 Expression: PTEN ---> TP53 30396902 10.1136/gut.jnl-2018-316822  
 Expression: PTEN ---> TP53 10.3390/molecules24132411  
 Expression: PTEN ---> TP53 10.1507/endocrj.EJ18-0538  
 Expression: PTEN ---> TP53 10.3892/or.2020.7457  
 Expression: PTEN ---> TP53 10.3892/or.2020.7457  
 Expression: PTEN ---> TP53 23114644 10.4161/cbt.22627  
 Expression: PTEN ---> TP53 23114644 10.4161/cbt.22627  
 Expression: PTEN ---> TP53 21164280 10.4161/cam.5.2.14375  
 Expression: PTEN ---> TP53 21873427 10.1074/jbc.M110.217620  
 Expression: PTEN ---> TP53 22394167 10.2174/138161212799859701  
 Expression: PTEN ---> TP53 22413754 10.1042/BJ20120098  
 Expression: PTEN ---> TP53 22592924 10.1165/rcmb.2011-03900C  
 Expression: PTEN ---> TP53 23908595 10.1593/neo.13376  
 Expression: PTEN ---> TP53 21436840 10.1038/leu.2011.46  
 Expression: PTEN ---> TP53 21436840 10.1038/leu.2011.46  
 Expression: PTEN ---> TP53 32246301 10.1007/s10522-020-09876-w  
 Expression: PTEN ---> TP53 23727861 10.1038/ng.2654  
 Expression: PTEN ---> TP53 21642958 10.1038/emboj.2011.178  
 Expression: PTEN ---> TP53 24127214 10.1083/jcb.201303110  
 Expression: PTEN ---> TP53 21695255 10.1371/journal.pone.0020715  
 Expression: PTEN ---> TP53 22164291 10.1371/journal.pone.0028433  
 Expression: PTEN ---> TP53 24063548 10.1089/ars.2013.5498  
 Expression: PTEN ---> TP53 24063548 10.1089/ars.2013.5498  
 Expression: PTEN ---> TP53 24081673 10.1007/s13277-013-1210-4  
 Expression: PTEN ---> TP53 24905788 10.1146/annurev-biochem-082411-113907  
 Expression: PTEN ---> TP53 24959190 10.1155/2014/724658  
 Expression: PTEN ---> TP53 24959190 10.1155/2014/724658  
 Expression: PTEN ---> TP53 20733006 10.1128/MCB.00004-10  
 Expression: PTEN ---> TP53 10.1681/ASN.2014121161  
 Expression: PTEN ---> TP53 26647729 10.3892/ijo.2015.3268  
 Expression: PTEN ---> TP53 26869029 10.1038/ncomms10689  
 Expression: PTEN ---> TP53 26477313 10.1038/onc.2015.253  
 Expression: PTEN ---> TP53 12620407  
 Expression: PTEN ---> TP53 14575575  
 Expression: PTEN ---> TP53 15619344  
 Expression: PTEN ---> TP53 16424003  
 Expression: PTEN ---> TP53 30971627 10.1507/endocrj.EJ18-053810.1507/endocrj.EJ18  
 Expression: PTEN ---> TP53 33256086 10.3390/ijms21238982  
 Expression: PTEN ---> TP53 34205272 10.3390/molecules26123737  
 Expression: PTEN ---> TP53 36180910 10.1186/s12929-022-00860-9  
 Expression: PTEN ---> TP53 34951363 10.2174/1566524022666211222161637  
 PromoterBinding: TP53 ---> PTEN 28602818 10.1016/j.jmb.2017.06.004

PromoterBinding: TP53 ---> PTEN 19173293 10.1002/ijc.24221  
PromoterBinding: TP53 ---> PTEN 29803738 10.1016/j.virol.2018.05.011  
PromoterBinding: TP53 ---> PTEN 29179029 10.1016/j.leukres.2017.08.007  
PromoterBinding: TP53 ---> PTEN 32035215 10.1016/j.fct.2020.111179  
PromoterBinding: TP53 ---> PTEN 23406730 10.1093/annonc/mdt013  
PromoterBinding: TP53 ---> PTEN 30738865 10.1016/j.semcancer.2019.02.001  
PromoterBinding: TP53 ---> PTEN 33675995 10.1016/j.biocel.2021.105965  
PromoterBinding: TP53 ---> PTEN 22510407 10.1016/j.bbrc.2012.04.015  
PromoterBinding: TP53 ---> PTEN 10.1016/S0006-291X(02)02983-2  
PromoterBinding: TP53 ---> PTEN 22290228 10.1016/j.bbrc.2012.01.065  
PromoterBinding: TP53 ---> PTEN 17258789 10.1016/j.humpath.2006.10.007  
PromoterBinding: TP53 ---> PTEN 16545436 10.1016/j.ygyno.2005.12.033  
PromoterBinding: TP53 ---> PTEN 21664656 10.1016/j.ygyno.2011.05.017  
PromoterBinding: TP53 ---> PTEN 16051030 10.1016/j.canlet.2004.12.006  
PromoterBinding: TP53 ---> PTEN 16996682 10.1016/j.canlet.2006.08.007  
PromoterBinding: TP53 ---> PTEN 12217521 10.1016/S0968-0004(02)02166-7  
PromoterBinding: TP53 ---> PTEN 12217521 10.1016/S0968-0004(02)02166-7  
PromoterBinding: TP53 ---> PTEN 11545734 10.1016/S1097-2765(01)00323-9  
PromoterBinding: TP53 ---> PTEN 18950730 10.1016/j.biocel.2008.09.022  
PromoterBinding: TP53 ---> PTEN 18718806 10.1016/j.drug.2008.07.001  
PromoterBinding: TP53 ---> PTEN 12620407 10.1016/S1535-6108(03)00021-7  
PromoterBinding: TP53 ---> PTEN 21146147 10.1016/j.trsl.2010.09.004  
PromoterBinding: TP53 ---> PTEN 23122111 10.1016/j.foodchem.2012.07.112  
PromoterBinding: TP53 ---> PTEN 25744176 10.1016/j.drudis.2015.02.011  
PromoterBinding: TP53 ---> PTEN 17998413  
PromoterBinding: TP53 ---> PTEN 18032782  
PromoterBinding: TP53 ---> PTEN 15193142  
PromoterBinding: TP53 ---> PTEN 16495927  
PromoterBinding: TP53 ---> PTEN 18172008  
PromoterBinding: TP53 ---> PTEN 18172008  
PromoterBinding: TP53 ---> PTEN 28301379 10.1097/CAD.0000000000000476  
PromoterBinding: TP53 ---> PTEN 28301379 10.1097/CAD.0000000000000476  
PromoterBinding: TP53 ---> PTEN 28301379 10.1097/CAD.0000000000000476  
PromoterBinding: TP53 ---> PTEN 30217221 10.1186/s13046-018-0898-9  
PromoterBinding: TP53 ---> PTEN 30486451 10.3390/ijms19123773  
PromoterBinding: TP53 ---> PTEN 31776983 10.1007/978-981-15-0602-4\_6  
PromoterBinding: TP53 ---> PTEN 33194023  
PromoterBinding: TP53 ---> PTEN 32974790 10.1007/s10549-020-05937-3  
PromoterBinding: TP53 ---> PTEN 22489661 10.1089/cbr.2011.1154  
PromoterBinding: TP53 ---> PTEN 20862607 10.1007/s10528-010-9379-3  
PromoterBinding: TP53 ---> PTEN 21990315 10.1210/en.2011-1207  
PromoterBinding: TP53 ---> PTEN 22218495 10.3892/ijmm.2012.879  
PromoterBinding: TP53 ---> PTEN 20736773 10.1097/PGP.0b013e3181de3068  
PromoterBinding: TP53 ---> PTEN 21297666 10.1038/onc.2011.6  
PromoterBinding: TP53 ---> PTEN 24083690 10.7314/APJCP.2013.14.8.4485  
PromoterBinding: TP53 ---> PTEN 24866016 10.1371/journal.pone.0098113  
PromoterBinding: TP53 ---> PTEN 24905788 10.1146/annurev-biochem-082411-113907  
PromoterBinding: TP53 ---> PTEN 19079342 10.1038/onc.2008.45110.1038/onc.2008.451  
PromoterBinding: TP53 ---> PTEN 20554748 10.1093/carcin/bgq12310.1093/carcin/bgq123  
PromoterBinding: TP53 ---> PTEN 16778187 10.1158/0008-5472.CAN-06-0772

PromoterBinding: TP53 ---> PTEN 16061640 10.1158/0008-5472.CAN-04-4184  
PromoterBinding: TP53 ---> PTEN 12917634 10.1038/sj.onc.1206783  
PromoterBinding: TP53 ---> PTEN 10865036 10.1007/s002680010164  
PromoterBinding: TP53 ---> PTEN 15843377 10.1074/jbc.M503026200  
PromoterBinding: TP53 ---> PTEN 19079342 10.1038/onc.2008.451  
PromoterBinding: TP53 ---> PTEN 15016317 10.1111/j.1349-7006.2004.tb02203.x  
PromoterBinding: TP53 ---> PTEN 20554748 10.1093/carcin/bgq123  
PromoterBinding: TP53 ---> PTEN 11729185 10.1074/jbc.M108302200  
PromoterBinding: TP53 ---> PTEN 10.1016/j.bbrc.2012.04.015  
PromoterBinding: TP53 ---> PTEN 19234438  
PromoterBinding: TP53 ---> PTEN 36430560 10.3390/ijms232214083  
negative Expression: NGF ---| GAI 10100865 10.1016/S0014-5793(99)00234-3  
negative Expression: NGF ---| GAI 10100865 10.1016/S0014-5793(99)00234-3  
negative PromoterBinding: TP53 ---| PPARG 10.1016/j.brainresbull.2011.07.021  
negative PromoterBinding: TP53 --21854837 10.1016/j.brainresbull.2011.07.021  
negative PromoterBinding: TP53 --21510869 10.1186/1471-2407-11-149  
negative PromoterBinding: TP53 --21445621 10.1007/s00394-011-0187-2  
negative PromoterBinding: TP53 --30181511 10.3390/ijms19092622  
negative PromoterBinding: TP53 --30143607 10.1038/s41467-018-05711-6  
negative PromoterBinding: TP53 --29593329 10.1038/s41556-018-0072-9  
negative PromoterBinding: TP53 --24675459 10.1038/cddis.2014.87  
negative PromoterBinding: TP53 --24312426 10.1371/journal.pone.0082494  
negative PromoterBinding: TP53 --29735908 10.3390/ijms19051387  
negative PromoterBinding: TP53 ---| PPARG 10.2741/4475  
negative PromoterBinding: TP53 --28155209 10.1007/s11999-017-5259-z  
negative PromoterBinding: TP53 --21421225 10.1016/j.juro.2010.12.101  
negative PromoterBinding: TP53 --19168033 10.1016/j.bbrc.2009.01.060  
negative PromoterBinding: TP53 --30181511 10.3390/ijms19092622  
positive Regulation: RAC1 --+> M# 32898553 10.1016/j.yexcr.2020.112265  
positive Regulation: RAC1 --+> M# 10681583 10.1074/jbc.275.8.5911  
positive Regulation: RAC1 --+> M# 17145753 10.1074/jbc.M607989200  
positive Regulation: RAC1 --+> M# 17145753 10.1074/jbc.M607989200  
positive Regulation: RAC1 --+> M# 11756405 10.1074/jbc.M104766200  
positive Regulation: RAC1 --+> M# 11279039 10.1074/jbc.M100254200  
positive Regulation: RAC1 --+> M# 20650890 10.1074/jbc.M110.105700  
positive Regulation: RAC1 --+> M# 17908694 10.1074/jbc.M702175200  
positive Regulation: RAC1 --+> M# 20529870 10.1074/jbc.M109.099655  
positive Regulation: RAC1 --+> M# 20529870 10.1074/jbc.M109.099655  
positive Regulation: RAC1 --+> M# 20529870 10.1074/jbc.M109.099655  
positive Regulation: RAC1 --+> M# 17008315 10.1074/jbc.M605288200  
positive Regulation: RAC1 --+> M# 14557270 10.1074/jbc.M307330200  
positive Regulation: RAC1 --+> M# 17088251 10.1074/jbc.M605817200  
positive Regulation: RAC1 --+> M# 10945974 10.1074/jbc.M002138200  
positive Regulation: RAC1 --+> MAPK1 10.1016/j.jid.2017.07.075  
positive Regulation: RAC1 --+> M# 29329780 10.1016/j.cellsig.2018.01.004  
positive Regulation: RAC1 --+> M# 31063759 10.1016/j.devcel.2019.04.007  
positive Regulation: RAC1 --+> M# 31063759 10.1016/j.devcel.2019.04.007  
positive Regulation: RAC1 --+> M# 32497487 10.1016/j.devcel.2020.05.011



positive Regulation: RAC1 --> M# 31257073 10.1016/j.ccell.2019.05.015  
positive Regulation: RAC1 --> M# 27070502 10.1016/j.intimp.2016.03.025  
positive Regulation: RAC1 --> M# 27930970 10.1016/j.intimp.2016.10.001  
positive Regulation: RAC1 --> M# 26923603 10.1016/j.celrep.2016.02.016  
positive Regulation: RAC1 --> M# 17568564 10.1016/j.bbrc.2007.05.214  
positive Regulation: RAC1 --> M# 17568564 10.1016/j.bbrc.2007.05.214  
positive Regulation: RAC1 --> M# 15093747 10.1016/j.yexcr.2004.02.002  
positive Regulation: RAC1 --> M# 19852956 10.1016/j.yexcr.2009.10.017  
positive Regulation: RAC1 --> M# 15013523 10.1016/j.canlet.2003.08.035  
positive Regulation: RAC1 --> M# 15893875 10.1016/j.canlet.2005.02.031  
positive Regulation: RAC1 --> M# 9024622 10.1016/S0960-9822(06)00052-2  
positive Regulation: RAC1 --> M# 16595175 10.1016/j.tcb.2006.03.002  
positive Regulation: RAC1 --> M# 24140422 10.1016/j.molcel.2013.09.015  
positive Regulation: RAC1 --> M# 24140422 10.1016/j.molcel.2013.09.015  
positive Regulation: RAC1 --> M# 25284480 10.1016/j.ccell.2014.08.017  
positive Regulation: RAC1 --> M# 25284480 10.1016/j.ccell.2014.08.017  
positive Regulation: RAC1 --> M# 12843210  
positive Regulation: RAC1 --> M# 12843210  
positive Regulation: RAC1 --> M# 11075808  
positive Regulation: RAC1 --> M# 18793427  
positive Regulation: RAC1 --> M# 18003981  
positive Regulation: RAC1 --> M# 17908694  
positive Regulation: RAC1 --> M# 17145753  
positive Regulation: RAC1 --> M# 17145753  
positive Regulation: RAC1 --> M# 17088251  
positive Regulation: RAC1 --> M# 17088251  
positive Regulation: RAC1 --> M# 17008315  
positive Regulation: RAC1 --> M# 16014609  
positive Regulation: RAC1 --> M# 15339911  
positive Regulation: RAC1 --> M# 15155836  
positive Regulation: RAC1 --> M# 15155836  
positive Regulation: RAC1 --> M# 15155836  
positive Regulation: RAC1 --> M# 14557270  
positive Regulation: RAC1 --> M# 12070151  
positive Regulation: RAC1 --> M# 12070151  
positive Regulation: RAC1 --> M# 11756405  
positive Regulation: RAC1 --> M# 11369774  
positive Regulation: RAC1 --> M# 11279039  
positive Regulation: RAC1 --> M# 10945984  
positive Regulation: RAC1 --> M# 10945974  
positive Regulation: RAC1 --> M# 10681583  
positive Regulation: RAC1 --> M# 10681583  
positive Regulation: RAC1 --> M# 10419534  
positive Regulation: RAC1 --> M# 10419534  
positive Regulation: RAC1 --> M# 17389689  
positive Regulation: RAC1 --> M# 16574914

positive Regulation: RAC1 --> M# 15027896  
positive Regulation: RAC1 --> M# 12902401  
positive Regulation: RAC1 --> M# 12902401  
positive Regulation: RAC1 --> M# 34294609 10.14348/molcells.2021.0031  
positive Regulation: RAC1 --> M# 20650890 10.1074/jbc.M110.10570010.1074/jbc.M110.10570  
positive Regulation: RAC1 --> M# 22494620 10.1186/bcr3164  
positive Regulation: RAC1 --> M# 22519702 10.1042/BJ2012005310.1042/BJ20120053  
positive Regulation: RAC1 --> M# 22617030 10.1016/j.cellsig.2012.05.01110.1016/j.cellsi  
positive Regulation: RAC1 --> M# 24371145 10.1074/jbc.M113.51851410.1074/jbc.M113.51851  
positive Regulation: RAC1 --> M# 31817229 10.3390/cells812156910.3390/cells8121569  
positive Regulation: RAC1 --> M# 15027896  
positive Regulation: RAC1 --> M# 12902401  
positive Regulation: RAC1 --> M# 10827130  
positive Regulation: RAC1 --> M# 18542102  
positive Regulation: RAC1 --> M# 15482467  
positive Regulation: RAC1 --> M# 19179620  
positive Regulation: RAC1 --> M# 14729984  
positive Regulation: RAC1 --> MAPK1  
positive Regulation: RAC1 --> M# 26561781 10.1038/cddis.2015.329  
positive Regulation: RAC1 --> MAPK1 10.1042/BST20160269  
positive Regulation: RAC1 --> MAPK1 10.1042/BST20160269  
positive Regulation: RAC1 --> M# 29620286 10.3892/or.2018.6345  
positive Regulation: RAC1 --> M# 29954442 10.1186/s13046-018-0787-2  
positive Regulation: RAC1 --> M# 30545369 10.1186/s12964-018-0312-4  
positive Regulation: RAC1 --> M# 31152053 10.1242/jcs.230706  
positive Regulation: RAC1 --> MAPK1 10.1074/jbc.RA119.008685  
positive Regulation: RAC1 --> MAPK1 10.1073/pnas.1914153117  
positive Regulation: RAC1 --> M# 32193458 10.1038/s41467-020-15308-7  
positive Regulation: RAC1 --> M# 20529870 10.1074/jbc.M109.099655  
positive Regulation: RAC1 --> M# 20650890 10.1074/jbc.M110.105700  
positive Regulation: RAC1 --> M# 20650890 10.1074/jbc.M110.105700  
positive Regulation: RAC1 --> M# 21482718 10.1083/jcb.201009100  
positive Regulation: RAC1 --> M# 21478669 10.4161/cc.10.10.15612  
positive Regulation: RAC1 --> M# 21170593 10.1007/s11033-010-0630-0  
positive Regulation: RAC1 --> M# 22519702 10.1042/BJ20120053  
positive Regulation: RAC1 --> M# 32471868 10.1074/jbc.RA119.01098110.1074/jbc.RA119.010  
positive Regulation: RAC1 --> M# 27551466 10.1038/cddiscovery.2015.3510.1038/cddiscover  
positive Regulation: RAC1 --> M# 12468535  
positive Regulation: RAC1 --> M# 22519702 10.1042/BJ20120053  
positive Regulation: RAC1 --> M# 22519702 10.1042/BJ20120053  
positive Regulation: RAC1 --> M# 11369774  
positive Regulation: RAC1 --> M# 15027896  
positive Regulation: RAC1 --> M# 14993270  
positive Regulation: RAC1 --> M# 23023511 10.1161/CIRCRESAHA.111.255216  
positive Regulation: RAC1 --> M# 23337888 10.1038/jid.2013.23  
positive Regulation: RAC1 --> M# 23781022 10.1242/jcs.126714

positive Regulation: RAC1 --> M# 23781022 10.1242/jcs.126714  
positive Regulation: RAC1 --> M# 22701712 10.1371/journal.pone.0038777  
positive Regulation: RAC1 --> M# 22701712 10.1371/journal.pone.0038777  
positive Regulation: RAC1 --> M# 22970259 10.1371/journal.pone.0044590  
positive Regulation: RAC1 --> M# 23734197 10.1371/journal.pone.0064350  
positive Regulation: RAC1 --> M# 24327733 10.1073/pnas.1314124110  
positive Regulation: RAC1 --> M# 24152593 10.4161/cam.26596  
positive Regulation: RAC1 --> M# 22668020 10.4149/neo\_2012\_070  
positive Regulation: RAC1 --> M# 25121739 10.1371/journal.pone.0104746  
positive Regulation: RAC1 --> M# 25121739 10.1371/journal.pone.0104746  
positive Regulation: RAC1 --> M# 27497523 10.1016/j.bbadis.2016.07.019  
positive Regulation: RAC1 --> M# 17568564 10.1016/j.bbrc.2007.05.214  
positive Regulation: RAC1 --> M# 19450605 10.1016/j.yjmcc.2009.05.002  
positive Regulation: RAC1 --> M# 19450605 10.1016/j.yjmcc.2009.05.002  
positive Regulation: RAC1 --> M# 19450605 10.1016/j.yjmcc.2009.05.002  
positive Regulation: RAC1 --> M# 22504301 10.1016/j.bbamcr.2012.03.015  
positive Regulation: RAC1 --> M# 18086571 10.1016/j.bbamcr.2007.10.024  
positive Regulation: RAC1 --> M# 18353489 10.1016/j.ejcb.2008.02.003  
positive Regulation: RAC1 --> M# 21726627 10.1016/j.cellsig.2011.06.014  
positive Regulation: RAC1 --> M# 22061968 10.1016/j.mcn.2011.10.008  
positive Regulation: RAC1 --> M# 15905109 10.1016/j.semcd.2005.03.010  
positive Regulation: RAC1 --> M# 25725286 10.1016/j.cellsig.2015.02.020  
positive Regulation: RAC1 --> M# 26707876 10.1016/j.bbrc.2015.12.056  
positive Regulation: RAC1 --> M# 18385518  
positive Regulation: RAC1 --> M# 16698790  
positive Regulation: RAC1 --> M# 17941827  
positive Regulation: RAC1 --> M# 11031201  
positive Regulation: RAC1 --> M# 12417261 10.1016/S0006-2952(02)01388-6  
positive Regulation: RAC1 --> M# 19852956 10.1016/j.yexcr.2009.10.017  
positive Regulation: RAC1 --> M# 23639442 10.1016/j.devcel.2013.03.019  
positive Regulation: RAC1 --> M# 18508927  
positive Regulation: RAC1 --> M# 18385518  
positive Regulation: RAC1 --> M# 17088251  
positive Regulation: RAC1 --> M# 11369774  
positive Regulation: RAC1 --> M# 15027896  
positive Regulation: RAC1 --> M# 16798728  
positive Regulation: RAC1 --> M# 16798728  
positive Regulation: RAC1 --> M# 16798728  
positive Regulation: RAC1 --> M# 22494620 10.1186/bcr3164  
positive Regulation: RAC1 --> M# 22494620 10.1186/bcr3164  
positive Regulation: RAC1 --> M# 23093703 10.1210/en.2012-1626  
positive Regulation: RAC1 --> M# 20529870 10.1074/jbc.M109.099655  
positive Regulation: RAC1 --> M# 23446149 10.1189/jlb.0912473  
positive Regulation: RAC1 --> M# 23657011 10.1073/pnas.1215902110  
positive Regulation: RAC1 --> M# 24086766 10.1371/journal.pone.0077027  
positive Regulation: RAC1 --> M# 24152593 10.4161/cam.26596  
positive Regulation: RAC1 --> M# 24371145 10.1074/jbc.M113.518514

positive Regulation: RAC1 --> M#24757372 10.4196/kjpp.2014.18.2.109  
 positive Regulation: RAC1 --> M#24571616 10.1186/1742-4690-11-20  
 positive Regulation: RAC1 --> M#25091805 10.1186/s12929-014-0067-1  
 positive Regulation: RAC1 --> M#25714841 10.1371/journal.pone.0115325  
 positive Regulation: RAC1 --> M#24760984 10.1152/ajpcell.00380.2013  
 positive Regulation: RAC1 --> M#23817184 10.1159/000350108  
 positive Regulation: RAC1 --> M#24043306 10.1128/MCB.00822-13  
 positive Regulation: RAC1 --> M#11158304  
 positive Regulation: RAC1 --> M#12485852  
 positive Regulation: RAC1 --> M#15009099  
 positive Regulation: RAC1 --> M#15027896  
 positive Regulation: RAC1 --> M#17088251  
 positive Regulation: RAC1 --> M#17568564  
 positive Regulation: RAC1 --> M#18086571  
 positive Regulation: RAC1 --> M#19450605 10.1016/j.yjmcc.2009.05.002  
 positive Regulation: RAC1 --> M#19450605 10.1016/j.yjmcc.2009.05.002  
 positive Regulation: RAC1 --> M#20175116 10.1002/jcp.22080  
 positive Regulation: RAC1 --> M#20383193 10.1038/onc.2010.95  
 positive Regulation: RAC1 --> M#21660950 10.1002/jcp.22563  
 positive Regulation: RAC1 --> M#22114025 10.1152/ajpendo.00227.2011  
 positive Regulation: RAC1 --> M#23524339 10.1016/j.cellsig.2013.03.011  
 positive Regulation: RAC1 --> M#23817184 10.1159/000350108  
 positive Regulation: RAC1 --> M#25725286 10.1016/j.cellsig.2015.02.020  
 positive Regulation: RAC1 --> M#25136657 10.1155/2014/340271  
 positive Regulation: RAC1 --> M#26379158 10.1371/journal.pone.0138381  
 positive Regulation: RAC1 --> MAPK1  
 positive Regulation: RAC1 --> M#26923603 10.1016/j.celrep.2016.02.016  
 positive Regulation: RAC1 --> M#192 10.1016/j.bbrc.2015.12.056  
 positive Regulation: RAC1 --> MAPK1 10.1074/jbc.M115.681544  
 positive Regulation: RAC1 --> M#28287114 10.1038/cmi.2017.4  
 positive Regulation: RAC1 --> M#28726720 10.3390/ijms1807157410.3390/ijms18071574  
 positive Regulation: RAC1 --> M#29229918 10.1038/s41598-017-15170-610.1038/s41598-017-  
 positive Regulation: RAC1 --> M#29329780 10.1016/j.cellsig.2018.01.00410.1016/j.cellsig  
 positive Regulation: RAC1 --> M#29537337 10.1152/physrev.00025.2017  
 positive Regulation: RAC1 --> M#33685622 10.1074/jbc.RA119.01098110.1074/jbc.RA119.010  
 positive Regulation: RAC1 --> M#33879799 10.1038/s41467-021-22531-3  
 positive Regulation: RAC1 --> M#28571533 10.2174/0929867324666170602082956  
 positive Regulation: RAC1 --> M#34109430 10.3892/mmr.2021.1220710.3892/mmr.2021.12207  
 positive Regulation: RAC1 --> M#34109430 10.3892/mmr.2021.12207  
 positive Regulation: RAC1 --> M#33107320 10.1089/ars.2020.8199  
 positive Regulation: RAC1 --> M#34326687 10.7150/ijbs.61790  
 ProtModification: MAPK1 ---> RAC129036929 10.3390/ijms18102148  
 ProtModification: MAPK1 ---> RAC130062409 10.1007/978-1-4939-8612-5\_9  
 ProtModification: MAPK1 ---> RAC124043306 10.1128/MCB.00822-13  
 ProtModification: MAPK1 ---> RAC124043306 10.1128/MCB.00822-13  
 ProtModification: MAPK1 ---> RAC124043306 10.1128/MCB.00822-13  
 ProtModification: MAPK1 ---> RAC124043306 10.1128/MCB.00822-13

ProtModification: MAPK1 ---> RAC124043306 10.1128/MCB.00822-13  
ProtModification: MAPK1 ---> RAC124043306 10.1128/MCB.00822-13  
ProtModification: MAPK1 ---> RAC124043306 10.1128/MCB.00822-13  
ProtModification: MAPK1 ---> RAC124043306 10.1128/MCB.00822-13  
ProtModification: MAPK1 ---> RAC124043306 10.1128/MCB.00822-13  
ProtModification: MAPK1 ---> RAC124043306 10.1128/MCB.00822-13  
ProtModification: MAPK1 ---> RAC124043306 10.1128/MCB.00822-13  
ProtModification: MAPK1 ---> RAC124043306 10.1128/MCB.00822-13  
ProtModification: MAPK1 ---> RAC124043306 10.1128/MCB.00822-13  
ProtModification: MAPK1 ---> RAC124043306 10.1128/MCB.00822-13  
ProtModification: MAPK1 ---> RAC126816343 10.1371/journal.pone.0147103  
ProtModification: MAPK1 ---> RAC124043306 10.1128/MCB.00822-1310.1128/MCB.00822-13  
ProtModification: MAPK1 ---> RAC124043306 10.1128/MCB.00822-1310.1128/MCB.00822-13  
ProtModification: MAPK1 ---> RAC130062409 10.1007/978-1-4939-8612-5\_910.1007/978-1-4939  
ProtModification: MAPK1 ---> RAC130062409 10.1007/978-1-4939-8612-5\_910.1007/978-1-4939  
ProtModification: MAPK1 ---> RAC124043306 10.1128/MCB.00822-13  
ProtModification: MAPK1 ---> RAC124462914 10.1016/j.bcp.2014.01.017  
ProtModification: MAPK1 ---> RAC117853895  
ProtModification: MAPK1 ---> RAC1  
ProtModification: MAPK1 ---> RAC130062409 10.1007/978-1-4939-8612-5\_9  
positive PromoterBinding: PPARG -34026331 10.1080/2162402X.2021.190650010.1080/2162402X  
positive PromoterBinding: PPARG -25072357 10.1016/j.lfs.2014.07.02110.1016/j.lfs.2014.0  
positive PromoterBinding: PPARG -21435906 10.1016/j.healun.2011.01.704  
positive PromoterBinding: PPARG -33766508 10.1016/j.jid.2021.02.748  
positive PromoterBinding: PPARG -33766508 10.1016/j.jid.2021.02.748  
positive PromoterBinding: PPARG -34697644 10.1007/s11882-021-01022-x  
positive PromoterBinding: PPARG -35242187 10.1155/2022/3224373  
positive Expression: AKT1 --> M#11535584 10.1074/jbc.M101220200  
positive Expression: AKT1 --> M#20595063 10.1016/j.bbamcr.2010.05.007  
positive Expression: AKT1 --> M#12086645 10.1016/S0896-6273(02)00717-1  
positive Expression: AKT1 --> M#24333213 10.1016/j.ejphar.2013.12.005  
positive Expression: AKT1 --> M#24333213 10.1016/j.ejphar.2013.12.005  
positive Expression: AKT1 --> M#11535584  
positive Expression: AKT1 --> M#11535584  
positive Expression: AKT1 --> M#16195541  
positive Expression: AKT1 --> M#19668241  
positive Expression: AKT1 --> M#17172275  
positive Expression: AKT1 --> M#27147558 10.1152/ajpcell.00003.2016  
positive Expression: AKT1 --> M#26919896 10.1152/ajplung.00306.2015  
positive Expression: AKT1 --> M#27752996 10.1007/s13277-016-5433-z  
positive Expression: AKT1 --> M#21617941 10.1007/s11033-011-0908-x  
positive Expression: AKT1 --> M#23303682 10.1095/biolreprod.112.104778  
positive Expression: AKT1 --> M#23949281 10.1038/cgt.2013.44  
positive Expression: AKT1 --> M#24598933 10.1371/journal.pone.0089841  
positive Expression: AKT1 --> M#25569101 10.1038/cddis.2014.550  
positive Expression: AKT1 --> M#25872526 10.3892/ijmm.2015.2170  
positive Expression: AKT1 --> M#11535584 10.1074/jbc.M101220200  
positive Expression: AKT1 --> M#25872526 10.3892/ijmm.2015.217010.3892/ijmm.2015.2170  
positive Expression: AKT1 --> M#26578388 10.1038/srep1681310.1038/srep16813  
positive Expression: AKT1 --> M#27085942 10.1016/j.jep.2016.04.01910.1016/j.jep.2016.0

positive Expression: AKT1 --> M/27752996 10.1007/s13277-016-5433-z  
 positive Expression: AKT1 --> M/31518562 10.1016/j.ejphar.2019.17265810.1016/j.ejphar.  
 positive Expression: AKT1 --> M/32553076 10.3967/bes2020.04410.3967/bes2020.044  
 positive Expression: AKT1 --> M/14992744 10.1016/j.jamcollsurg.2003.10.004  
 positive Expression: AKT1 --> MAPK1 10.3892/ijmm.2019.4275  
 Expression: MAPK1 ---> AKT1 16864584 10.1074/jbc.M602516200  
 Expression: MAPK1 ---> AKT1 22490886 10.1016/j.neulet.2012.03.068  
 Expression: MAPK1 ---> AKT1 23562504 10.1016/j.neulet.2013.02.067  
 Expression: MAPK1 ---> AKT1 24291216 10.1016/j.drudis.2013.11.018  
 Expression: MAPK1 ---> AKT1 16864584  
 Expression: MAPK1 ---> AKT1 12095987  
 Expression: MAPK1 ---> AKT1 21119656  
 Expression: MAPK1 ---> AKT1 21119656  
 Expression: MAPK1 ---> AKT1 19668241  
 Expression: MAPK1 ---> AKT1 27655635 10.1007/s00403-016-1686-z  
 Expression: MAPK1 ---> AKT1 29344654 10.3892/mmr.2018.8444  
 Expression: MAPK1 ---> AKT1 30621146 10.3390/ijms20010160  
 Expression: MAPK1 ---> AKT1 21904562 10.1155/2012/368196  
 Expression: MAPK1 ---> AKT1 23496764 10.1042/BJ20121578  
 Expression: MAPK1 ---> AKT1 24598933 10.1371/journal.pone.0089841  
 Expression: MAPK1 ---> AKT1 24787708 10.1371/journal.pone.009513610.1371/journal.p  
 Expression: MAPK1 ---> AKT1 27085942 10.1016/j.jep.2016.04.01910.1016/j.jep.2016.0  
 Expression: MAPK1 ---> AKT1 29344654 10.3892/mmr.2018.844410.3892/mmr.2018.8444  
 Expression: MAPK1 ---> AKT1 32553076 10.3967/bes2020.04410.3967/bes2020.044  
 Expression: MAPK1 ---> AKT1 10.1016/j.neulet.2012.03.068  
 Expression: MAPK1 ---> AKT1 10.3390/ijms20010160  
 Expression: MAPK1 ---> AKT1 10.1042/BJ20121578  
 Expression: MAPK1 ---> AKT1 28739729 10.21873/anticanres.11830  
 Expression: MAPK1 ---> AKT1 21762482 10.1186/1471-2202-12-69  
 Expression: MAPK1 ---> AKT1 10.1016/j.bbrc.2003.09.065  
 Expression: MAPK1 ---> AKT1 16858009  
 Expression: MAPK1 ---> AKT1 21503582 10.3892/or.2011.1264  
 Expression: MAPK1 ---> AKT1 20963488 10.1007/s10616-010-9310-0  
 Expression: MAPK1 ---> AKT1 23749166 10.1007/s11010-013-1710-y  
 Expression: MAPK1 ---> AKT1 25116684 10.3390/ijms150813833  
 Expression: MAPK1 ---> AKT1 25118589 10.1038/ncomms5657  
 Expression: MAPK1 ---> AKT1 27382014 10.1124/mol.116.104398  
 Expression: MAPK1 ---> AKT1 29770357 10.1515/med-2018-002910.1515/med-2018-0029  
 Expression: MAPK1 ---> AKT1 30364730 10.11909/j.issn.1671-5411.2018.07.00110.11909  
 ProtModification: AKT1 ---> MAPK1 30471866 10.1016/j.bbrc.2018.11.108  
 ProtModification: AKT1 ---> MAPK1 16282323 10.1074/jbc.M505546200  
 ProtModification: AKT1 ---> MAPK1 20693286 10.1074/jbc.M110.171058  
 ProtModification: AKT1 ---> MAPK1 18974095 10.1074/jbc.M805165200  
 ProtModification: AKT1 ---> MAPK1 29128169 10.1016/j.surg.2017.04.031  
 ProtModification: AKT1 ---> MAPK1 28522271 10.1016/j.mce.2017.05.015  
 ProtModification: AKT1 ---> MAPK1 32861756 10.1016/j.bbagen.2020.129723  
 ProtModification: AKT1 ---> MAPK1 10.1016/j.apsb.2021.04.016  
 ProtModification: AKT1 ---> MAPK1 32420479 10.1016/j.heliyon.2020.e03892  
 ProtModification: AKT1 ---> MAPK1 22178087 10.1016/j.mce.2011.11.024

ProtModification: AKT1 ---> MAPK119022565 10.1016/j.canlet.2008.10.013  
ProtModification: AKT1 ---> MAPK120627457 10.1016/j.schres.2010.05.008  
ProtModification: AKT1 ---> MAPK126844774 10.1016/j.bbamcr.2016.01.025  
ProtModification: AKT1 ---> MAPK118974095  
ProtModification: AKT1 ---> MAPK117931419  
ProtModification: AKT1 ---> MAPK116282323 10.1074/jbc.M505546200  
ProtModification: AKT1 ---> MAPK115355992  
ProtModification: AKT1 ---> MAPK112468535  
ProtModification: AKT1 ---> MAPK111303022  
ProtModification: AKT1 ---> MAPK116763222  
ProtModification: AKT1 ---> MAPK115319270  
ProtModification: AKT1 ---> MAPK114640974  
ProtModification: AKT1 ---> MAPK114640974  
ProtModification: AKT1 ---> MAPK116858399  
ProtModification: AKT1 ---> MAPK116648865  
ProtModification: AKT1 ---> MAPK119151252  
ProtModification: AKT1 ---> MAPK117893321  
ProtModification: AKT1 ---> MAPK120844138  
ProtModification: AKT1 ---> MAPK127521423 10.1152/ajpheart.00956.2015  
ProtModification: AKT1 ---> MAPK129177675 10.1007/978-1-4939-7477-1\_29  
ProtModification: AKT1 ---> MAPK130205384 10.1159/000493411  
ProtModification: AKT1 ---> MAPK133198383 10.3390/ijms21228542  
ProtModification: AKT1 ---> MAPK133712543 10.1073/PNAS.2015786118  
ProtModification: AKT1 ---> MAPK134299610 10.3390/molecules26144333  
ProtModification: AKT1 ---> MAPK120693286 10.1074/jbc.M110.171058  
ProtModification: AKT1 ---> MAPK122101421 10.3892/mmr.2011.682  
ProtModification: AKT1 ---> MAPK122449991  
ProtModification: AKT1 ---> MAPK122134701  
ProtModification: AKT1 ---> MAPK120844138 10.1523/JNEUROSCI.0895-10.2010  
ProtModification: AKT1 ---> MAPK124068831 10.1523/JNEUROSCI.2010-13.2013  
ProtModification: AKT1 ---> MAPK121519026 10.1200/JCO.2010.33.9473  
ProtModification: AKT1 ---> MAPK121519026 10.1200/JCO.2010.33.9473  
ProtModification: AKT1 ---> MAPK123593332 10.1371/journal.pone.0060863  
ProtModification: AKT1 ---> MAPK124351840 10.3390/ijms141224656  
ProtModification: AKT1 ---> MAPK124664246 10.1371/journal.pone.0092986  
ProtModification: AKT1 ---> MAPK125028931 10.1371/journal.pone.0102521  
ProtModification: AKT1 ---> MAPK125150498 10.1038/nm.3664  
ProtModification: AKT1 ---> MAPK126504021  
ProtModification: AKT1 ---> MAPK126808499 10.1172/JCI82788  
ProtModification: AKT1 ---> MAPK112481435  
ProtModification: AKT1 ---> MAPK116311120 10.1016/j.humpath.2005.09.009  
ProtModification: AKT1 ---> MAPK116707604 10.1158/1078-0432.CCR-05-1732  
ProtModification: AKT1 ---> MAPK120693286 10.1074/jbc.M110.17105810.1074/jbc.M110.17105  
ProtModification: AKT1 ---> MAPK125504417 10.1002/mabi.20140042810.1002/mabi.201400428  
ProtModification: AKT1 ---> MAPK127652596 10.1159/00044852410.1159/000448524  
ProtModification: AKT1 ---> MAPK130076720 10.1002/jcp.2689110.1002/jcp.26891  
ProtModification: AKT1 ---> MAPK120693286 10.1074/jbc.M110.171058

ProtModification: AKT1 ---> MAPK123585556 10.1530/EJE-13-0093  
ProtModification: AKT1 ---> MAPK123970788 10.1210/en.2013-1197  
ProtModification: AKT1 ---> MAPK124988468 10.1371/journal.pone.0101172  
ProtModification: AKT1 ---> MAPK116311120 10.1016/j.humpath.2005.09.009  
ProtModification: AKT1 ---> MAPK125028931 10.1371/journal.pone.0102521  
ProtModification: AKT1 ---> MAPK123593332 10.1371/journal.pone.0060863  
ProtModification: AKT1 ---> MAPK121519026 10.1200/JCO.2010.33.9473  
ProtModification: AKT1 ---> MAPK116282323 10.1074/jbc.M505546200  
ProtModification: AKT1 ---> MAPK126844774 10.1016/j.bbamcr.2016.01.025  
ProtModification: AKT1 ---> MAPK121126166 10.1089/ars.2010.3401  
ProtModification: AKT1 ---> MAPK122449991 10.2152/jmi.59.36  
ProtModification: AKT1 ---> MAPK122101421 10.3892/mmr.2011.682  
ProtModification: AKT1 ---> MAPK124351840 10.3390/ijms141224656  
ProtModification: AKT1 ---> MAPK112468535 10.1074/jbc.M210578200  
ProtModification: AKT1 ---> MAPK121220344 10.1073/pnas.1012975108  
ProtModification: AKT1 ---> MAPK112481435  
ProtModification: AKT1 ---> MAPK116648865 10.1038/modpathol.3800619  
ProtModification: AKT1 ---> MAPK119371940 10.1016/j.urology.2008.12.058  
ProtModification: AKT1 ---> MAPK111359783 10.1074/jbc.M103250200  
ProtModification: AKT1 ---> MAPK122134701 10.1007/s11010-011-1137-2  
ProtModification: AKT1 ---> MAPK117931419 10.1186/1476-4598-6-63  
ProtModification: AKT1 ---> MAPK118974095 10.1074/jbc.M805165200  
ProtModification: AKT1 ---> MAPK122178087 10.1016/j.mce.2011.11.024  
ProtModification: AKT1 ---> MAPK119022565 10.1016/j.canlet.2008.10.013  
ProtModification: AKT1 ---> MAPK125504417 10.1002/mabi.201400428  
ProtModification: AKT1 ---> MAPK116952986 10.1161/CIRCULATIONAHA.105.602953  
ProtModification: AKT1 ---> MAPK114640974 10.1042/BJ20031398  
ProtModification: AKT1 ---> MAPK127652596 10.1159/000448524  
ProtModification: AKT1 ---> MAPK114734530 10.1083/jcb.200307056  
ProtModification: AKT1 ---> MAPK124664246 10.1371/journal.pone.0092986  
ProtModification: AKT1 ---> MAPK115355992 10.1074/jbc.M408374200  
ProtModification: AKT1 ---> MAPK111303022 10.1074/jbc.M011647200  
ProtModification: AKT1 ---> MAPK1289 10.1007/bf02891714  
ProtModification: AKT1 ---> MAPK115987944 10.1523/JNEUROSCI.1005-05.2005  
ProtModification: AKT1 ---> MAPK120844138 10.1523/JNEUROSCI.0895-10.2010  
ProtModification: AKT1 ---> MAPK119151252 10.1152/ajpheart.01147.2008  
ProtModification: AKT1 ---> MAPK120926579 10.1210/en.2010-0792  
ProtModification: AKT1 ---> MAPK120627457 10.1016/j.schres.2010.05.008  
ProtModification: AKT1 ---> MAPK119372237 10.1210/me.2009-0011  
ProtModification: AKT1 ---> MAPK111882599 10.1161/hy02t2.102907  
ProtModification: AKT1 ---> MAPK115319270 10.1161/01.ATV.0000143096.15099.ce  
ProtModification: AKT1 ---> MAPK1 10.2174/1566524016666160802145700  
ProtModification: AKT1 ---> MAPK1 10.1172/JCI82788  
ProtModification: AKT1 ---> MAPK134105991 10.1152/AJPLUNG.00181.2020  
ProtModification: AKT1 ---> MAPK1289 10.1016/j.surg.2017.04.031  
ProtModification: AKT1 ---> MAPK115998799  
ProtModification: AKT1 ---> MAPK1  
ProtModification: AKT1 ---> MAPK119371940 10.1016/j.urology.2008.12.058  
ProtModification: AKT1 ---> MAPK119372237  
ProtModification: AKT1 ---> MAPK114734530  
ProtModification: AKT1 ---> MAPK111359783  
ProtModification: AKT1 ---> MAPK116952986  
ProtModification: AKT1 ---> MAPK111882599  
ProtModification: AKT1 ---> MAPK115987944



ProtModification: AKT1 ---> MAPK120926579 10.1210/en.2010-0792  
ProtModification: AKT1 ---> MAPK121126166 10.1089/ars.2010.3401  
ProtModification: AKT1 ---> MAPK121220344 10.1073/pnas.1012975108  
ProtModification: AKT1 ---> MAPK123585556 10.1530/EJE-13-0093  
ProtModification: AKT1 ---> MAPK115894115 10.1016/j.imlet.2005.01.005  
ProtModification: AKT1 ---> MAPK121406225 10.1016/j.cellsig.2011.03.009  
ProtModification: AKT1 ---> MAPK115588981 10.1016/j.ymeth.2004.07.003  
ProtModification: AKT1 ---> MAPK124927915 10.1016/j.jnutbio.2014.04.007  
ProtModification: AKT1 ---> MAPK125749171 10.1016/j.tranon.2014.11.001  
ProtModification: AKT1 ---> MAPK119955661  
ProtModification: AKT1 ---> MAPK118577570  
ProtModification: AKT1 ---> MAPK117463060  
ProtModification: AKT1 ---> MAPK116395408  
ProtModification: AKT1 ---> MAPK114593075  
ProtModification: AKT1 ---> MAPK120955573  
ProtModification: AKT1 ---> MAPK115256384  
ProtModification: AKT1 ---> MAPK117535857  
ProtModification: AKT1 ---> MAPK122406993 10.4161/cbt.19609  
ProtModification: AKT1 ---> MAPK122403294 10.2337/db11-1578  
ProtModification: AKT1 ---> MAPK120955573 10.1186/1471-2121-11-78  
ProtModification: AKT1 ---> MAPK122683727 10.1097/SHK.0b013e31825da754  
ProtModification: AKT1 ---> MAPK124098385 10.1371/journal.pone.0075440  
ProtModification: AKT1 ---> MAPK123970788 10.1210/en.2013-1197  
ProtModification: AKT1 ---> MAPK124423728 10.1038/ncomms4039  
ProtModification: AKT1 ---> MAPK124983470 10.1371/journal.pone.0101349  
ProtModification: AKT1 ---> MAPK124988468 10.1371/journal.pone.0101172  
ProtModification: AKT1 ---> MAPK124988468 10.1371/journal.pone.0101172  
ProtModification: AKT1 ---> MAPK122431920 10.1593/neo.111602  
ProtModification: AKT1 ---> MAPK125832422 10.1038/aps.2014.156  
ProtModification: AKT1 ---> MAPK126164453 10.1097/WNR.0000000000000401  
ProtModification: AKT1 ---> MAPK1  
ProtModification: AKT1 ---> MAPK124394804 10.1038/ncomms4051  
ProtModification: AKT1 ---> MAPK112444071  
ProtModification: AKT1 ---> MAPK121293001  
ProtModification: AKT1 ---> MAPK119717735  
ProtModification: AKT1 ---> MAPK121293001 10.1161/CIRCRESAHA.110.238949  
ProtModification: AKT1 ---> MAPK124394804 10.1038/ncomms4051  
ProtModification: AKT1 ---> MAPK128481866 10.1038/onc.2017.114  
ProtModification: AKT1 ---> MAPK128589317 10.1007/s12079-017-0395-5  
ProtModification: AKT1 ---> MAPK129412164 10.1016/j.bbrc.2018.02.002  
ProtModification: AKT1 ---> MAPK129517106 10.3892/or.2018.6305  
ProtModification: AKT1 ---> MAPK129762523 10.3390/ijms19051470  
ProtModification: AKT1 ---> MAPK129551770 10.1038/s41388-018-0170-y  
ProtModification: AKT1 ---> MAPK129741098 10.1152/ajprenal.00033.2018  
ProtModification: AKT1 ---> MAPK129741098 10.1152/ajprenal.00033.2018  
ProtModification: AKT1 ---> MAPK1 10.4143/crt.2018.526  
ProtModification: AKT1 ---> MAPK1 10.1097/WNR.0000000000001241  
ProtModification: AKT1 ---> MAPK135109876 10.1186/s12974-022-02405-1  
ProtModification: MAPK1 ---> AKT126952643 10.1016/j.ajpath.2016.01.003  
ProtModification: MAPK1 ---> AKT128007595 10.1016/j.bbrc.2016.12.117  
ProtModification: MAPK1 ---> AKT130007439 10.1016/j.bbrc.2018.07.021  
ProtModification: MAPK1 ---> AKT112435727 10.1074/jbc.M209148200  
ProtModification: MAPK1 ---> AKT1 10.1074/jbc.M005911200  
ProtModification: MAPK1 ---> AKT114701865 10.1074/jbc.M312048200

ProtModification: MAPK1 ---> AKT114973141 10.1074/jbc.M312996200  
ProtModification: MAPK1 ---> AKT115020586 10.1074/jbc.M314099200  
ProtModification: MAPK1 ---> AKT118974095 10.1074/jbc.M805165200  
ProtModification: MAPK1 ---> AKT117200115 10.1074/jbc.M609712200  
ProtModification: MAPK1 ---> AKT111359783 10.1074/jbc.M103250200  
ProtModification: MAPK1 ---> AKT131931009 10.1016/j.jmb.2020.01.002  
ProtModification: MAPK1 ---> AKT129909367 10.1016/j.molimm.2018.05.021  
ProtModification: MAPK1 ---> AKT129981429 10.1016/j.canlet.2018.06.040  
ProtModification: MAPK1 ---> AKT126424114 10.1016/j.freeradbiomed.2015.08.011  
ProtModification: MAPK1 ---> AKT131479709 10.1016/j.cellsig.2019.109409  
ProtModification: MAPK1 ---> AKT132169603 10.1016/j.bone.2020.115316  
ProtModification: MAPK1 ---> AKT112054675 10.1016/S0006-291X(02)00385-6  
ProtModification: MAPK1 ---> AKT112543452 10.1016/S0006-8993(02)03774-5  
ProtModification: MAPK1 ---> AKT118590724 10.1016/j.ejphar.2008.06.040  
ProtModification: MAPK1 ---> AKT121316056 10.1016/j.atherosclerosis.2011.01.019  
ProtModification: MAPK1 ---> AKT118715655 10.1016/j.jneuroim.2008.05.018  
ProtModification: MAPK1 ---> AKT118359096 10.1016/j.tips.2008.02.002  
ProtModification: MAPK1 ---> AKT119046792 10.1016/j.lungcan.2008.10.009  
ProtModification: MAPK1 ---> AKT122178087 10.1016/j.mce.2011.11.024  
ProtModification: MAPK1 ---> AKT116427189 10.1016/j.canlet.2005.11.001  
ProtModification: MAPK1 ---> AKT112086645 10.1016/S0896-6273(02)00717-1  
ProtModification: MAPK1 ---> AKT115567066 10.1016/j.cellsig.2004.08.002  
ProtModification: MAPK1 ---> AKT120627457 10.1016/j.schres.2010.05.008  
ProtModification: MAPK1 ---> AKT123043959 10.1016/j.yexcr.2012.09.018  
ProtModification: MAPK1 ---> AKT122944602 10.1016/j.neuint.2012.08.010  
ProtModification: MAPK1 ---> AKT123376282 10.1016/j.jep.2013.01.032  
ProtModification: MAPK1 ---> AKT124362258 10.1016/j.ygcn.2013.12.006  
ProtModification: MAPK1 ---> AKT114523037  
ProtModification: MAPK1 ---> AKT117200115  
ProtModification: MAPK1 ---> AKT115632127  
ProtModification: MAPK1 ---> AKT115020586  
ProtModification: MAPK1 ---> AKT114973141  
ProtModification: MAPK1 ---> AKT114701865  
ProtModification: MAPK1 ---> AKT112435727  
ProtModification: MAPK1 ---> AKT111359783  
ProtModification: MAPK1 ---> AKT111340082  
ProtModification: MAPK1 ---> AKT114979873  
ProtModification: MAPK1 ---> AKT114640974  
ProtModification: MAPK1 ---> AKT112761576  
ProtModification: MAPK1 ---> AKT119151252  
ProtModification: MAPK1 ---> AKT115870293  
ProtModification: MAPK1 ---> AKT112969887  
ProtModification: MAPK1 ---> AKT128259922 10.3892/mmr.2017.6195  
ProtModification: MAPK1 ---> AKT128498467 10.3892/ijo.2017.3982  
ProtModification: MAPK1 ---> AKT128731146 10.3892/ijmm.2017.3069  
ProtModification: MAPK1 ---> AKT130348829 10.1042/CS20180557  
ProtModification: MAPK1 ---> AKT130348829 10.1042/CS20180557  
ProtModification: MAPK1 ---> AKT130348829 10.1042/CS20180557  
ProtModification: MAPK1 ---> AKT131138788 10.1038/s41419-019-1656-4  
ProtModification: MAPK1 ---> AKT130758982 10.1152/ajpregu.00251.2018  
ProtModification: MAPK1 ---> AKT130758982 10.1152/ajpregu.00251.2018  
ProtModification: MAPK1 ---> AKT131117055 10.1530/JOE-18-0704  
ProtModification: MAPK1 ---> AKT131619201 10.1186/s12885-019-6161-8  
ProtModification: MAPK1 ---> AKT132564026 10.1159/000506956

ProtModification: MAPK1 ---> AKT132772213 10.1007/s10555-020-09920-8  
ProtModification: MAPK1 ---> AKT133498448 10.3390/i\_jms22031021  
ProtModification: MAPK1 ---> AKT133972443 10.1073/pnas.2026104118  
ProtModification: MAPK1 ---> AKT122304473 10.1089/ars.2011.4005  
ProtModification: MAPK1 ---> AKT122499584 10.1096/fj.11-202994  
ProtModification: MAPK1 ---> AKT123027608 10.1530/JOE-12-0335  
ProtModification: MAPK1 ---> AKT124065093 10.3390/i\_jms140918861  
ProtModification: MAPK1 ---> AKT121795553 10.1523/JNEUROSCI.2125-11.2011  
ProtModification: MAPK1 ---> AKT121795553 10.1523/JNEUROSCI.2125-11.2011  
ProtModification: MAPK1 ---> AKT123922774 10.1371/journal.pone.0069668  
ProtModification: MAPK1 ---> AKT124324260 10.1074/jbc.M113.505065  
ProtModification: MAPK1 ---> AKT124874473 10.1038/bjc.2014.282  
ProtModification: MAPK1 ---> AKT125028931 10.1371/journal.pone.0102521  
ProtModification: MAPK1 ---> AKT112481435  
ProtModification: MAPK1 ---> AKT116311120 10.1016/j.humpath.2005.09.009  
ProtModification: MAPK1 ---> AKT117634416 10.1152/ajpcell.00535.2006  
ProtModification: MAPK1 ---> AKT148 10.1016/j.bbrc.2018.07.021  
ProtModification: MAPK1 ---> AKT1 10.1016/j.jmb.2020.01.002  
ProtModification: MAPK1 ---> AKT1 10.1016/j.cellsig.2004.08.002  
ProtModification: MAPK1 ---> AKT110477751  
ProtModification: MAPK1 ---> AKT1 10.1042/CS20180557  
ProtModification: MAPK1 ---> AKT1 10.1042/CS20180557  
ProtModification: MAPK1 ---> AKT1 10.1042/CS20180557  
ProtModification: MAPK1 ---> AKT1 10.1152/ajpregu.00251.2018  
ProtModification: MAPK1 ---> AKT1 10.1152/ajpregu.00251.2018  
ProtModification: MAPK1 ---> AKT1 10.1530/JOE-18-0704  
ProtModification: MAPK1 ---> AKT1 10.1186/s12885-019-6161-8  
ProtModification: MAPK1 ---> AKT1 10.1074/jbc.M113.505065  
ProtModification: MAPK1 ---> AKT125892444 10.1016/j.mce.2015.04.008  
ProtModification: MAPK1 ---> AKT118362153  
ProtModification: MAPK1 ---> AKT112133838  
ProtModification: MAPK1 ---> AKT110488121  
ProtModification: MAPK1 ---> AKT116952986  
ProtModification: MAPK1 ---> AKT116151019  
ProtModification: MAPK1 ---> AKT126683901 10.1152/ajpheart.00642.2015  
ProtModification: MAPK1 ---> AKT128692379 10.1080/15384047.2017.1345384  
ProtModification: MAPK1 ---> AKT122454147 10.1210/en.2011-1967  
ProtModification: MAPK1 ---> AKT121285867 10.1097/CAD.0b013e3283439781  
ProtModification: MAPK1 ---> AKT123766351 10.1161/CIRCULATIONAHA.112.000029  
ProtModification: MAPK1 ---> AKT123584088 10.1038/nm.3150  
ProtModification: MAPK1 ---> AKT123986484 10.1242/jcs.133421  
ProtModification: MAPK1 ---> AKT121408177 10.1371/journal.pone.0017621  
ProtModification: MAPK1 ---> AKT124130815 10.1371/journal.pone.0076951  
ProtModification: MAPK1 ---> AKT126718891 10.3892/mmr.2015.4619  
ProtModification: MAPK1 ---> AKT116176809 10.1016/j.bbrc.2005.08.260  
ProtModification: MAPK1 ---> AKT115922325 10.1016/j.ejphar.2005.04.035  
ProtModification: MAPK1 ---> AKT117950068 10.1016/j.jss.2007.01.051  
ProtModification: MAPK1 ---> AKT119914172 10.1016/j.cell.2009.10.023  
ProtModification: MAPK1 ---> AKT116083987 10.1016/j.jhep.2005.04.011  
ProtModification: MAPK1 ---> AKT118407408 10.1016/j.canlet.2008.02.064  
ProtModification: MAPK1 ---> AKT122444502 10.1016/j.jnutbio.2011.11.002

ProtModification: MAPK1 ---> AKT1 10.1016/j.fob.2012.02.002  
 ProtModification: MAPK1 ---> AKT123399764 10.1016/j.ejphar.2013.01.048  
 ProtModification: MAPK1 ---> AKT123650581 10.1016/j.fob.2012.02.002  
 ProtModification: MAPK1 ---> AKT118045963  
 ProtModification: MAPK1 ---> AKT112183360  
 ProtModification: MAPK1 ---> AKT117616749  
 ProtModification: MAPK1 ---> AKT118493596  
 ProtModification: MAPK1 ---> AKT122895181 10.4161/cc.21194  
 ProtModification: MAPK1 ---> AKT123254561 10.3892/or.2012.2195  
 ProtModification: MAPK1 ---> AKT120630868 10.1074/jbc.M110.108241  
 ProtModification: MAPK1 ---> AKT121876713 10.1155/2012/486568  
 ProtModification: MAPK1 ---> AKT121107779 10.1007/s13105-010-0063-1  
 ProtModification: MAPK1 ---> AKT123776078 10.1084/jem.20112495  
 ProtModification: MAPK1 ---> AKT122733137 10.1038/onc.2012.253  
 ProtModification: MAPK1 ---> AKT123358187 10.1038/mt.2013.9  
 ProtModification: MAPK1 ---> AKT122880006 10.1371/journal.pone.0042501  
 ProtModification: MAPK1 ---> AKT124423728 10.1038/ncomms4039  
 ProtModification: MAPK1 ---> AKT123193052 10.1152/ajpendo.00409.2012  
 ProtModification: MAPK1 ---> AKT123275616 10.1152/ajpgi.00418.2012  
 ProtModification: MAPK1 ---> AKT112147707  
 ProtModification: MAPK1 ---> AKT124642271 10.1186/1476-4598-13-61  
 ProtModification: MAPK1 ---> AKT125962684 10.3892/or.2015.3941  
 ProtModification: MAPK1 ---> AKT121107779 10.1007/s13105-010-0063-1  
 ProtModification: MAPK1 ---> AKT1  
 ProtModification: MAPK1 ---> AKT127879454 10.1177/1933719116678689  
 ProtModification: MAPK1 ---> AKT128784627 10.1084/jem.20161855  
 ProtModification: MAPK1 ---> AKT129258294 10.1038/nature25167  
 ProtModification: MAPK1 ---> AKT129369798 10.1016/j.jamcollsurg.2017.12.040  
 ProtModification: MAPK1 ---> AKT129517103 10.3892/or.2018.6306  
 ProtModification: MAPK1 ---> AKT130042178 10.1242/dev.162594  
 ProtModification: MAPK1 ---> AKT130226884 10.1371/journal.pone.0203952  
 ProtModification: MAPK1 ---> AKT129856035 10.1007/978-1-4939-7825-0\_25  
 ProtModification: MAPK1 ---> AKT1 10.1007/s00011-019-01218-y  
 ProtModification: MAPK1 ---> AKT134386919 10.1007/s11064-021-03418-7  
 ProtModification: MAPK1 ---> AKT1 10.1016/j.ejmech.2021.113996  
 ProtModification: MAPK1 ---> AKT136207295 10.1038/s41467-022-33521-4  
 ProtModification: MAPK1 ---> AKT136555673 10.3390/ijms232416028  
 positive Expression: PTGS2 --> 29736687 10.1007/s10787-018-0489-6  
 negative Regulation: SFRP1 ---| 20367282 10.1089/scd.2009.0326  
 negative Regulation: NOTCH1 ---| 26302232 10.1016/j.biomaterials.2015.08.026  
 negative Regulation: NOTCH1 ---| 30336197 10.1016/j.canlet.2018.09.031  
 negative Regulation: NOTCH1 ---| 30497876 10.1016/j.prp.2018.10.013  
 negative Regulation: NOTCH1 ---| 29879503 10.1016/j.gene.2018.06.005  
 negative Regulation: NOTCH1 ---| 31545250 10.1016/j.biopha.2019.109306  
 negative Regulation: NOTCH1 ---| 29723707 10.1016/j.dnarep.2018.04.002  
 negative Regulation: NOTCH1 ---| 27727250 10.1038/mtna.2016.82  
 negative Regulation: NOTCH1 ---| 21420785 10.1016/j.canlet.2011.02.034  
 negative Regulation: NOTCH1 ---| 20600632 10.1016/j.bbcan.2010.06.001  
 negative Regulation: NOTCH1 ---| 23500524 10.1016/j.biocel.2013.02.022  
 negative Regulation: NOTCH1 ---| 23500524 10.1016/j.biocel.2013.02.022  
 negative Regulation: NOTCH1 ---| 23810012 10.1016/B978-0-12-416673-8.00013-7  
 negative Regulation: NOTCH1 ---| 28914645 10.1097/CCO.0000000000000406  
 negative Regulation: NOTCH1 ---| 32228202 10.1177/0300060520904847  
 negative Regulation: NOTCH1 ---| 32913140 10.1124/MOLPHARM.120.000006

negative Regulation: NOTCH1 ---| 32913140 10.1124/MOLPHARM.120.000006  
negative Regulation: NOTCH1 ---| 24451948 10.3760/cma.j.issn.0366-6999.20120230  
negative Regulation: NOTCH1 ---| 24451948 10.3760/cma.j.issn.0366-6999.20120230  
negative Regulation: NOTCH1 ---| 26927514 10.1038/labinvest.2015.163  
negative Regulation: NOTCH1 ---| 19550121  
negative Regulation: NOTCH1 ---| 20204271 10.3892/or\_00000712  
negative Regulation: NOTCH1 ---| 20204271 10.3892/or\_00000712  
negative Regulation: NOTCH1 ---| 23568245 10.1007/s00268-013-2010-010.1007/s00268-013-2  
negative Regulation: NOTCH1 ---| 24316112 10.1016/j.arcmed.2013.10.00110.1016/j.arcmed.  
negative Regulation: NOTCH1 ---| 24782036 10.1007/s11010-014-2069-410.1007/s11010-014-2  
negative Regulation: NOTCH1 ---| 24802328 10.1007/s12032-014-0972-x10.1007/s12032-014-0  
negative Regulation: NOTCH1 ---| 31545250 10.1016/j.biopha.2019.10930610.1016/j.biopha.  
negative Regulation: NOTCH1 ---| 1150 10.1016/j.prp.2018.10.013  
negative Regulation: NOTCH1 ---| chemosens10.1097/CCO.0000000000000406  
negative Regulation: NOTCH1 ---| chemosens10.2298/ABS210423030R  
negative Regulation: NOTCH1 ---| 33882814 10.2174/1871530321666210421125231  
positive Regulation: CD274 --> #32560747 10.3727/096504020X15925659763817  
Expression: MAPK1 ---> BIRC7 32359099 10.1113/EP08858410.1113/EP088584  
Expression: MAPK1 ---> BIRC7 32359099 10.1113/EP08858410.1113/EP088584  
positive Expression: UCA1 --> Af29864621 10.1016/j.biopha.2018.05.141  
positive Expression: UCA1 --> Af27765938 10.12659/MSM.900689  
positive Expression: UCA1 --> Af29328452 10.3892/or.2018.6182  
positive Expression: UCA1 --> Af29762839 10.26355/eurrev-201804-14828  
positive Expression: UCA1 --> Af29762839 10.26355/eurrev-201804-14828  
positive Expression: UCA1 --> Af30208633 10.3390/ijms19092711  
positive Expression: UCA1 --> Af30272271 10.3892/ijo.2018.4574  
positive Expression: UCA1 --> Af31799676 10.26355/eurrev\_201911\_19573  
positive Expression: UCA1 --> Af24312245 10.1371/journal.pone.0080817  
positive Expression: UCA1 --> Af33777227 10.3892/ol.2021.1266510.3892/ol.2021.12665  
positive Expression: UCA1 --> AKT1 10.26355/eurrev\_201911\_19573  
positive Expression: UCA1 --> Af32601922 10.1007/s11033-020-05609-x  
positive Expression: UCA1 --> Af32627021 10.3892/or.2020.7638  
positive Expression: UCA1 --> Af29212166 10.18632/oncotarget.1928110.18632/oncotarget.  
positive Expression: UCA1 --> Af28569779 10.1038/cddis.2017.14310.1038/cddis.2017.143  
positive Expression: UCA1 --> Af26464647  
positive Expression: UCA1 --> Af29328452 10.3892/or.2018.6182  
positive Expression: UCA1 --> Af28751619 10.18632/oncotarget.1928110.18632/oncotarget.  
positive Expression: UCA1 --> AKT1 10.1691/ph.2016.6625  
positive Expression: UCA1 --> AKT1 10.1691/ph.2016.6625  
positive Expression: UCA1 --> Af30015961 10.3892/mmr.2018.9278  
positive Expression: UCA1 --> AKT1 10.1042/BSR20190590  
positive Expression: UCA1 --> AKT1 10.3892/ijo.2019.4679  
positive Expression: UCA1 --> Af30272345 10.3892/ijo.2018.4575  
positive Expression: UCA1 --> Af30272271 10.3892/ijo.2018.4574  
positive Expression: UCA1 --> AKT1 10.1016/j.jid.2019.04.029  
positive Expression: UCA1 --> Af33565716 10.1002/prp2.72010.1002/prp2.720  
positive Expression: UCA1 --> Af28569779 10.1038/cddis.2017.143  
positive Expression: UCA1 --> Af33743811 10.1186/s13048-021-00792-2  
positive Expression: UCA1 --> Af33535952 10.2174/1568009621666210203110305  
positive Expression: UCA1 --> Af33432087 10.1038/s41417-020-00272-7  
positive Expression: UCA1 --> Af35117446 10.21037/tcr.2019.12.4710.21037/tcr.2019.12.4  
positive Expression: UCA1 --> AKT1 10.1016/j.hbpd.2022.12.002  
PromoterBinding: PHF20 ---> TP53 22334668 10.1074/jbc.M111.333922  
PromoterBinding: PHF20 ---> TP53 22334668 10.1074/jbc.M111.333922

PromoterBinding: PHF20 ---> TP53 22334668 10.1074/jbc.M111.333922  
PromoterBinding: PHF20 ---> TP53 22334668 10.1074/jbc.M111.333922  
PromoterBinding: PHF20 ---> TP53 22334668 10.1074/jbc.M111.333922  
PromoterBinding: PHF20 ---> TP53 32555448 10.1038/s41418-020-0580-6  
PromoterBinding: PHF20 ---> TP53 22334668 10.1074/jbc.M111.333922  
positive PromoterBinding: PPARG -30119946 10.1016/j.tim.2018.08.001  
positive PromoterBinding: PPARG -29928066 10.1371/journal.ppat.100710010.1371/journal.p  
positive PromoterBinding: PPARG -29928066 10.1371/journal.ppat.1007100  
positive PromoterBinding: PPARG -25944662 10.1016/j.bbrc.2015.04.023  
positive PromoterBinding: PPARG --> MCL1 10.1016/S1074-7613(04)00030-5  
positive PromoterBinding: PPARG -30119946 10.1016/j.tim.2018.08.001  
positive PromoterBinding: PPARG -607 10.1016/j.tim.2018.08.001  
positive PromoterBinding: PPARG -607 10.1016/j.tim.2018.08.001  
negative Expression: MAPK1 ---| (21669876 10.1074/jbc.M111.248435  
negative Expression: MAPK1 ---| (21669876 10.1074/jbc.M111.248435  
negative Expression: MAPK1 ---| (23846224 10.1038/cddis.2013.253  
negative Expression: MAPK1 ---| (19498045  
negative Expression: MAPK1 ---| (22748238 10.1016/j.cytogfr.2012.05.008  
Regulation: BIRC7 ---> AKT1 23524337 10.1016/j.cellsig.2013.03.012  
Regulation: BIRC7 ---> AKT1 29039608 10.3892/or.2017.6017  
Regulation: BIRC7 ---> AKT1 33673050 10.3390/ijms22041820  
Regulation: BIRC7 ---> AKT1 27175933 10.3892/mmr.2016.5242  
Regulation: BIRC7 ---> AKT1 27175933 10.3892/mmr.2016.524210.3892/mmr.2016.5242  
negative Expression: NOTCH1 ---| 22613711 10.1074/jbc.M111.292516  
negative Expression: NOTCH1 ---| 22613711 10.1074/jbc.M111.292516  
negative Expression: NOTCH1 ---| 22613711 10.1074/jbc.M111.292516  
negative Expression: NOTCH1 ---| 22613711 10.1074/jbc.M111.292516  
negative Expression: NOTCH1 ---| 22613711 10.1074/jbc.M111.292516  
negative Expression: NOTCH1 ---| 22613711 10.1074/jbc.M111.292516  
negative Expression: NOTCH1 ---| 22613711 10.1074/jbc.M111.292516  
negative Expression: NOTCH1 ---| 22613711 10.1074/jbc.M111.292516  
negative Expression: NOTCH1 ---| 22613711 10.1074/jbc.M111.292516  
negative Expression: NOTCH1 ---| 22613711 10.1074/jbc.M111.292516  
negative Expression: NOTCH1 ---| 22613711 10.1074/jbc.M111.292516  
negative Expression: NOTCH1 ---| 22613711 10.1074/jbc.M111.292516  
negative Expression: PTEN ---| P128844858 10.1016/j.cbi.2017.08.014  
negative Expression: PTEN ---| P132890667 10.1016/j.cellsig.2020.109767  
negative Expression: PTEN ---| P122898050 10.1016/j.bbrc.2012.07.165  
negative Expression: PTEN ---| P125058027 10.1016/j.ajpath.2014.05.023  
negative Expression: PTEN ---| P125058027 10.1016/j.ajpath.2014.05.023  
negative Expression: PTEN ---| P125176064 10.1016/j.biomaterials.2014.08.016  
negative Expression: PTEN ---| P125176064 10.1016/j.biomaterials.2014.08.016

negative Expression: PTEN ---| P126984887 10. 1530/ERC-16-0039  
negative Expression: PTEN ---| P129582250 10. 1007/s12264-018-0219-5  
negative Expression: PTEN ---| P129687845 10. 26355/eurrev-201804-14717  
negative Expression: PTEN ---| P130406888 10. 1007/s11033-018-4378-2  
negative Expression: PTEN ---| P122746381 10. 1089/ars. 2011. 4408  
negative Expression: PTEN ---| P123589525 10. 1210/jc. 2013-1106  
negative Expression: PTEN ---| P123633918 10. 1593/neo. 121024  
negative Expression: PTEN ---| P125176064 10. 1016/j. biomaterials. 2014. 08. 01610. 1016/j. b  
negative Expression: PTEN ---| PTGS2 10. 1530/ERC-16-0039  
negative Expression: PTEN ---| PTGS2  
negative Expression: PTGS2 ---| F29339153 10. 1016/j. bbrc. 2018. 01. 061  
negative Expression: PTGS2 ---| F29339153 10. 1016/j. bbrc. 2018. 01. 061  
negative Expression: PTGS2 ---| F30243936 10. 1016/j. gene. 2018. 09. 034  
negative Expression: PTGS2 ---| F25770423 10. 1016/j. bbrc. 2015. 03. 008  
negative Expression: PTGS2 ---| F25770423 10. 1016/j. bbrc. 2015. 03. 008  
negative Expression: PTGS2 ---| F25770423 10. 1016/j. bbrc. 2015. 03. 008  
negative Expression: PTGS2 ---| F25770423 10. 1016/j. bbrc. 2015. 03. 008  
negative Expression: PTGS2 ---| F25770423 10. 1016/j. bbrc. 2015. 03. 008  
negative Expression: PTGS2 ---| F25770423 10. 1016/j. bbrc. 2015. 03. 008  
negative Expression: PTGS2 ---| F28851377 10. 1186/s12943-017-0718-4  
negative Expression: PTGS2 ---| F29048666 10. 3892/or. 2017. 5981  
negative Expression: PTGS2 ---| F29596308 10. 3390/i jms19041019  
negative Expression: PTGS2 ---| F26554780 10. 1097/MD. 000000000000180610. 1097/MD. 0000000  
negative Expression: PTGS2 ---| F27385366 10. 18632/aging. 10098710. 18632/aging. 100987  
negative Expression: PTGS2 ---| F28502821 10. 1016/j. mad. 2017. 05. 004  
negative Expression: PTGS2 ---| F25770423 10. 1016/j. bbrc. 2015. 03. 008  
negative Expression: PTGS2 ---| F20854947 10. 1016/j. bone. 2010. 09. 020  
negative Expression: PTGS2 ---| F20854947 10. 1016/j. bone. 2010. 09. 020  
negative Expression: PTGS2 ---| F22898050 10. 1016/j. bbrc. 2012. 07. 165  
negative Expression: PTGS2 ---| F15767780  
negative Expression: PTGS2 ---| PTEN  
negative Expression: PTGS2 ---| F28791404 10. 3892/or. 2017. 5872  
Regulation: NOTCH1 ---> MAPK1 29080702 10. 1016/j. pharmthera. 2017. 10. 017  
Regulation: NOTCH1 ---> MAPK1 15817159 10. 1016/j. yexcr. 2005. 01. 015  
Regulation: NOTCH1 ---> MAPK1 20616044  
Regulation: NOTCH1 ---> MAPK1 10. 1074/jbc. M116. 759134  
Regulation: NOTCH1 ---> MAPK1 10. 1096/fj. 201601341RRR  
Regulation: NOTCH1 ---> MAPK1 29874112 10. 1152/ajpcell. 00182. 2017  
Regulation: NOTCH1 ---> MAPK1 22205705 10. 1074/jbc. M111. 310375  
Regulation: NOTCH1 ---> MAPK1 22004682 10. 1186/1476-4598-10-130  
Regulation: NOTCH1 ---> MAPK1 20616044 10. 1073/pnas. 1000132107  
Regulation: NOTCH1 ---> MAPK1 23531541 10. 3390/i jms14046863  
Regulation: NOTCH1 ---> MAPK1 23542173 10. 1038/onc. 2013. 74  
Regulation: NOTCH1 ---> MAPK1 24472723 10. 1124/jpet. 113. 207563  
Regulation: NOTCH1 ---> MAPK1 10. 1074/jbc. M116. 720698  
Regulation: NOTCH1 ---> MAPK1 10. 1074/jbc. M116. 720698  
Regulation: NOTCH1 ---> MAPK1 23533157 10. 1002/stem. 137310. 1002/stem. 1373  
Regulation: NOTCH1 ---> MAPK1 24472723 10. 1124/jpet. 113. 20756310. 1124/jpet. 113. 20756  
Regulation: NOTCH1 ---> MAPK1 21622856 10. 4049/jimmunol. 100360610. 4049/jimmunol. 1003  
Regulation: NOTCH1 ---> MAPK1 17320900 10. 1016/j. jmb. 2006. 10. 043  
Regulation: NOTCH1 ---> MAPK1 10. 1016/S0197-4580 (98) 00041-4  
Regulation: NOTCH1 ---> MAPK1 18332140  
Regulation: NOTCH1 ---> MAPK1 17664272  
Regulation: NOTCH1 ---> MAPK1 17090547  
Regulation: NOTCH1 ---> MAPK1 17090547

Regulation: NOTCH1 ---> MAPK1 14602722  
 Regulation: NOTCH1 ---> MAPK1 20616044  
 Regulation: NOTCH1 ---> MAPK1 17210639  
 Regulation: NOTCH1 ---> MAPK1 27572051 10.3892/mmr.2016.5688  
 Regulation: NOTCH1 ---> MAPK1 21768114 10.1074/jbc.M111.232413  
 Regulation: NOTCH1 ---> MAPK1 21768114 10.1074/jbc.M111.232413  
 Regulation: NOTCH1 ---> MAPK1 22205705 10.1074/jbc.M111.310375  
 Regulation: NOTCH1 ---> MAPK1 20616044 10.1073/pnas.1000132107  
 Regulation: NOTCH1 ---> MAPK1 20616044 10.1073/pnas.1000132107  
 Regulation: NOTCH1 ---> MAPK1 21273559 10.1161/ATVBAHA.110.221945  
 Regulation: NOTCH1 ---> MAPK1 24714220 10.4161/cam.28437  
 Regulation: NOTCH1 ---> MAPK1 25194568 10.1038/nm.3678  
 Regulation: NOTCH1 ---> MAPK1 25194568 10.1038/nm.3678  
 Regulation: NOTCH1 ---> MAPK1 21622856 10.4049/jimmunol.1003606  
 Regulation: NOTCH1 ---> MAPK1 25194568 10.1038/nm.3678  
 Regulation: NOTCH1 ---> MAPK1 25194568 10.1038/nm.3678  
 Regulation: NOTCH1 ---> MAPK1 27578780 10.1242/dev.137919  
 Regulation: NOTCH1 ---> MAPK1 27578780 10.1242/dev.137919  
 Regulation: NOTCH1 ---> MAPK1 24504340 10.1242/dev.098905  
 Regulation: NOTCH1 ---> MAPK1 25380967 10.1186/1476-4598-13-247  
 Regulation: NOTCH1 ---> MAPK1 10.1074/jbc.M116.759134  
 Regulation: NOTCH1 ---> MAPK1 28536843 10.1007/s00726-017-2432-3  
 Regulation: NOTCH1 ---> MAPK1 29769419 10.26402/jpp.2018.1.04  
 Regulation: NOTCH1 ---> MAPK1 29743588 10.1038/s41388-018-0251-y  
 Regulation: NOTCH1 ---> MAPK1 29743588 10.1038/s41388-018-0251-y  
 Regulation: NOTCH1 ---> MAPK1 29874112 10.1152/ajpcell.00182.2017  
 Regulation: NOTCH1 ---> MAPK1 30206308 10.1038/s41375-018-0248-010.1038/s41375-018-0  
 Regulation: GPER1 ---> TP53 10.1507/endocrj.EJ15-0571  
 Regulation: GPER1 ---> TP53 25275589 10.1038/cddis.2014.398  
 Regulation: GPER1 ---> TP53 25275589 10.1038/cddis.2014.398  
 Regulation: GPER1 ---> TP53 26225773 10.1038/cddis.2015.201  
 Regulation: GPER1 ---> TP53 28595943 10.1016/j.jsbmb.2017.05.005  
 Regulation: GPER1 ---> TP53 25275589 10.1038/cddis.2014.398  
 Regulation: GPER1 ---> TP53 25275589 10.1038/cddis.2014.398  
 Regulation: GPER1 ---> TP53  
 negative Regulation: SPP1 ---| cf 28433634 10.1016/j.bbrc.2017.04.100  
 negative Regulation: SPP1 ---| cf 30535434 10.3892/ijo.2018.4656  
 negative Regulation: SPP1 ---| cf 21539449 10.1089/cbr.2010.0838  
 negative Regulation: SPP1 ---| cf 30627777 10.1007/s00280-018-3759-510.1007/s00280-018-3  
 negative Regulation: SPP1 ---| chemosensitivity  
 Binding: BECN1 ---- TP53 30981885 10.1016/j.ejps.2019.04.011  
 Binding: BECN1 ---- TP53 23088850 10.1016/j.mito.2012.10.010  
 Binding: BECN1 ---- TP53 23088850 10.1016/j.mito.2012.10.010  
 Binding: BECN1 ---- TP53 30563957 10.3390/ijms18091883  
 Binding: BECN1 ---- TP53 30258193 10.1038/s41419-018-1016-9  
 Binding: BECN1 ---- TP53 33375363 10.3390/ijms22010179  
 Binding: BECN1 ---- TP53 23151455 10.4161/cc.22778  
 Binding: BECN1 ---- TP53 22356768 10.4161/cc.11.6.19670  
 Binding: BECN1 ---- TP53  
 Binding: BECN1 ---- TP53 24554038 10.1590/1414-431X2013323110.1590/1414-431X201



|                                |            |                                 |                        |
|--------------------------------|------------|---------------------------------|------------------------|
| Binding: BECN1 ---- TP53       | 25208472   | 10.1111/jcmm.12386              | 10.1111/jcmm.12386     |
| Binding: BECN1 ---- TP53       | 31945648   | 10.1016/j.jinorgbio.2019.110989 | 10.1016/j.jinc         |
| Binding: BECN1 ---- TP53       | 34335587   | 10.3389/fimmu.2021.685523       | 10.3389/fimmu.2021.6   |
| Binding: BECN1 ---- TP53       |            | 10.3390/ijms18091883            |                        |
| Binding: BECN1 ---- TP53       | 35482278   | 10.1007/s12264-022-00861-6      |                        |
| Expression: GPER1 ---> CLDN1   | 26731262   | 10.1371/journal.pone.0145212    |                        |
| Expression: GPER1 ---> CLDN1   | 30227306   | 10.1016/j.neo.2018.08.01010     | 10.1016/j.neo.2018.0   |
| Expression: GPER1 ---> CLDN1   |            | 10.14670/HH-18-157              |                        |
| negative Expression: BECN1 --- | 131356866  | 10.1016/j.semcaner.2019.07.013  |                        |
| negative Expression: BECN1 --- | 132800272  | 10.1016/j.mrrev.2020.108321     |                        |
| negative Expression: BECN1 --- | 132800272  | 10.1016/j.mrrev.2020.108321     |                        |
| negative Expression: BECN1 --- | 124858802  | 10.1016/j.bcp.2014.05.009       |                        |
| negative Expression: BECN1 --- | 124858802  | 10.1016/j.bcp.2014.05.009       |                        |
| negative Expression: BECN1 --- | 127559856  | 10.1080/15548627.2016.1217380   |                        |
| negative Expression: BECN1 --- | 129230017  | 10.1038/s41556-017-0007-x       |                        |
| negative Expression: BECN1 --- | 129991800  | 10.1038/s41388-018-0395-9       |                        |
| negative Expression: BECN1 --- | 130328348  | 10.1530/REP-18-0243             |                        |
| negative Expression: BECN1 --- | 131776978  | 10.1007/978-981-15-0602-4_1     |                        |
| negative Expression: BECN1 --- | 123486312  | 10.4161/auto.24132              |                        |
| negative Expression: BECN1 --- | 123542691  | 10.1038/nn.3365                 |                        |
| negative Expression: BECN1 --- | 124256242  | 10.1042/BST20130185             |                        |
| negative Expression: BECN1 --- | 125180518  | 10.4161/auto.34398              |                        |
| negative Expression: BECN1 --- | 126530936  | 10.3892/ijo.2015.3227           |                        |
| negative Expression: BECN1 --- | 121962518  | 10.1016/j.cell.2011.08.03710    | 10.1016/j.cell.2011    |
| negative Expression: BECN1 --- | 130539860  | 10.4103/0973-1482.204898        | 10.4103/0973-1482.204  |
| negative Expression: BECN1 --- | 134678225  | 10.1016/j.bcp.2021.114797       |                        |
| negative Expression: BECN1 --- | 136528652  | 10.1038/s41467-022-35557-y      |                        |
| negative Expression: BECN1 --- | 136528652  | 10.1038/s41467-022-35557-y      |                        |
| negative Expression: BECN1 --- | 136528652  | 10.1038/s41467-022-35557-y      |                        |
| negative Expression: BECN1 --- | 136528652  | 10.1038/s41467-022-35557-y      |                        |
| negative Expression: BECN1 --- | 136528652  | 10.1038/s41467-022-35557-y      |                        |
| negative Expression: BECN1 --- | 136528652  | 10.1038/s41467-022-35557-y      |                        |
| Binding: TP53 ---- RAC1        | 30059710   | 10.1016/j.mam.2018.07.002       |                        |
| Binding: TP53 ---- RAC1        | 28947497   | 10.1101/gad.301564.117          |                        |
| Binding: TP53 ---- RAC1        | 28947497   | 10.1101/gad.301564.117          |                        |
| Binding: TP53 ---- RAC1        | 28947497   | 10.1101/gad.301564.117          |                        |
| Binding: TP53 ---- RAC1        | 28947497   | 10.1101/gad.301564.117          |                        |
| Binding: TP53 ---- RAC1        | 28947497   | 10.1101/gad.301564.117          |                        |
| Binding: TP53 ---- RAC1        | 28947497   | 10.1101/gad.301564.117          |                        |
| Binding: TP53 ---- RAC1        | 28947497   | 10.1101/gad.301564.117          |                        |
| Binding: TP53 ---- RAC1        | 28947497   | 10.1101/gad.301564.117          |                        |
| Binding: TP53 ---- RAC1        | 28947497   | 10.1101/gad.301564.117          |                        |
| Binding: TP53 ---- RAC1        | 32275841   | 10.1080/15384101.2020.1749790   |                        |
| Binding: TP53 ---- RAC1        | 28947497   | 10.1101/gad.301564.117          | 10.1101/gad.301564.117 |
| Binding: TP53 ---- RAC1        | 28947497   | 10.1101/gad.301564.117          |                        |
| Expression: BECN1 ---> SPP1    | 24657887   | 10.1016/j.matbio.2014.03.001    |                        |
| Expression: BECN1 ---> SPP1    | 34716503   | 10.1007/s11033-021-06866-0      |                        |
| negative Expression: RAC1 ---  | TF15303276 | 10.1016/j.bbrc.2004.06.088      |                        |
| negative Expression: RAC1 ---  | TF15303276 | 10.1016/j.bbrc.2004.06.088      |                        |
| negative Expression: RAC1 ---  | TF28825724 | 10.1038/onc.2017.292            |                        |
| negative Expression: RAC1 ---  | TF23750283 | 10.1371/journal.pone.0066275    |                        |
| negative Expression: RAC1 ---  | TF23750283 | 10.1371/journal.pone.0066275    |                        |
| negative Expression: RAC1 ---  | TF23750283 | 10.1371/journal.pone.0066275    |                        |
| negative Expression: RAC1 ---  | TF23750283 | 10.1371/journal.pone.0066275    |                        |
| negative Expression: RAC1 ---  | TF23750283 | 10.1371/journal.pone.0066275    |                        |

negative Expression: RAC1 ---| TF 23750283 10.1371/journal.pone.0066275  
 negative Expression: RAC1 ---| TF 23750283 10.1371/journal.pone.0066275  
 negative Expression: RAC1 ---| TF 23750283 10.1371/journal.pone.0066275  
 negative Expression: RAC1 ---| TF 23750283 10.1371/journal.pone.0066275  
 negative Expression: RAC1 ---| TF 16395716 10.1002/ijc.21763  
 negative Expression: RAC1 ---| TF 23750283 10.1371/journal.pone.006627510.1371/journal.p  
 negative Expression: RAC1 ---| TP53  
 negative Expression: RAC1 ---| TF 34765009 10.1155/2021/8428130  
 Regulation: TP53 ---> MAPK1 29654721 10.1016/j.ajpath.2018.03.006  
 Regulation: TP53 ---> MAPK1 27616194 10.1016/j.bbrc.2016.09.035  
 Regulation: TP53 ---> MAPK1 30037885 10.1182/blood-2018-03-828269  
 Regulation: TP53 ---> MAPK1 22039050 10.1074/jbc.M111.265397  
 Regulation: TP53 ---> MAPK1 22039050 10.1074/jbc.M111.265397  
 Regulation: TP53 ---> MAPK1 15078887 10.1074/jbc.M312135200  
 Regulation: TP53 ---> MAPK1 11821415 10.1074/jbc.M111598200  
 Regulation: TP53 ---> MAPK1 29852310 10.1016/j.bioorg.2018.05.020  
 Regulation: TP53 ---> MAPK1 29852310 10.1016/j.bioorg.2018.05.020  
 Regulation: TP53 ---> MAPK1 32738450 10.1016/j.jhep.2020.07.036  
 Regulation: TP53 ---> MAPK1 29232553 10.1016/j.ccell.2017.11.003  
 Regulation: TP53 ---> MAPK1 29232553 10.1016/j.ccell.2017.11.003  
 Regulation: TP53 ---> MAPK1 29232553 10.1016/j.ccell.2017.11.003  
 Regulation: TP53 ---> MAPK1 31269434 10.1016/j.celrep.2019.06.004  
 Regulation: TP53 ---> MAPK1 32075732 10.1016/j.celrep.2020.01.074  
 Regulation: TP53 ---> MAPK1 33812333 10.1016/j.redox.2021.101924  
 Regulation: TP53 ---> MAPK1 19497412 10.1016/j.cbi.2009.03.012  
 Regulation: TP53 ---> MAPK1 17208232 10.1016/j.febslet.2006.12.035  
 Regulation: TP53 ---> MAPK1 18448277 10.1016/j.toxlet.2008.03.012  
 Regulation: TP53 ---> MAPK1 16814113 10.1016/j.freeradbiomed.2006.04.019  
 Regulation: TP53 ---> MAPK1 16814113 10.1016/j.freeradbiomed.2006.04.019  
 Regulation: TP53 ---> MAPK1 18295447 10.1016/j.cellsig.2007.12.020  
 Regulation: TP53 ---> MAPK1 18396012 10.1016/j.cellsig.2008.02.012  
 Regulation: TP53 ---> MAPK1 18440285 10.1016/j.dnarep.2008.03.003  
 Regulation: TP53 ---> MAPK1 22921303 10.1016/j.lfs.2012.08.012  
 Regulation: TP53 ---> MAPK1 22921303 10.1016/j.lfs.2012.08.012  
 Regulation: TP53 ---> MAPK1 22796517 10.1016/j.pharmthera.2012.07.003  
 Regulation: TP53 ---> MAPK1 22749133 10.1016/j.jnutbio.2012.01.012  
 Regulation: TP53 ---> MAPK1 23108049 10.1016/j.febslet.2012.10.031  
 Regulation: TP53 ---> MAPK1 23583409 10.1016/j.bbrc.2013.03.124  
 Regulation: TP53 ---> MAPK1 23870914 10.1016/j.foodchem.2013.05.021  
 Regulation: TP53 ---> MAPK1 25190107 10.1016/j.acthis.2014.08.005  
 Regulation: TP53 ---> MAPK1 25459512 10.1016/j.bbagen.2014.10.008  
 Regulation: TP53 ---> MAPK1 12639981





Regulation: TP53 ---> MAPK1 22336915 10.4161/cc.11.5.19452  
 Regulation: TP53 ---> MAPK1 21138557 10.1186/1476-4598-9-311  
 Regulation: TP53 ---> MAPK1 21468663 10.1007/s10495-011-0597-x  
 Regulation: TP53 ---> MAPK1 21107428 10.1038/nature09535  
 Regulation: TP53 ---> MAPK1 24114360 10.1007/s10495-013-0913-8  
 Regulation: TP53 ---> MAPK1 24504121 10.1371/journal.pone.0087229  
 Regulation: TP53 ---> MAPK1 24329111 10.2174/1389200214666131211155613  
 Regulation: TP53 ---> MAPK1 24867259 10.3892/ijo.2014.2463  
 Regulation: TP53 ---> MAPK1 24867259 10.3892/ijo.2014.2463  
 Regulation: TP53 ---> MAPK1 23873029 10.1038/onc.2013.287  
 Regulation: TP53 ---> MAPK1 25268131 10.1371/journal.pone.0106812  
 Regulation: TP53 ---> MAPK1 10.1074/jbc.M114.590943  
 Regulation: TP53 ---> MAPK1 22740414 10.1128/JVI.06279-11  
 Regulation: TP53 ---> MAPK1 22740414 10.1128/JVI.06279-11  
 Regulation: TP53 ---> MAPK1 25815718 10.1371/journal.pone.0119366  
 Regulation: TP53 ---> MAPK1 25815718 10.1371/journal.pone.0119366  
 Regulation: TP53 ---> MAPK1 25815718 10.1371/journal.pone.0119366  
 Regulation: TP53 ---> MAPK1 15150542 10.1038/sj.cdd.4401368  
 Regulation: TP53 ---> MAPK1 15150542 10.1038/sj.cdd.4401368  
 Regulation: TP53 ---> MAPK1 15150542 10.1038/sj.cdd.4401368  
 Regulation: TP53 ---> MAPK1 15078887  
 Regulation: TP53 ---> MAPK1 15880691  
 Regulation: TP53 ---> MAPK1 15880691  
 Regulation: TP53 ---> MAPK1 17132229  
 Regulation: TP53 ---> MAPK1 17215959  
 Regulation: TP53 ---> MAPK1 17208232  
 Regulation: TP53 ---> MAPK1 19910580 10.1161/CIRCRESAHA.109.195834  
 Regulation: TP53 ---> MAPK1 22039050 10.1074/jbc.M111.265397  
 Regulation: TP53 ---> MAPK1 23108049 10.1016/j.febslet.2012.10.031  
 Regulation: TP53 ---> MAPK1 23314357 10.3892/ijo.2013.1764  
 Regulation: TP53 ---> MAPK1 23559009 10.1038/cddis.2013.97  
 Regulation: TP53 ---> MAPK1 24486524 10.1016/j.bcp.2014.01.025  
 Regulation: TP53 ---> MAPK1 25936182  
 Regulation: TP53 ---> MAPK1 10.1007/s11055-016-0342-6  
 Regulation: TP53 ---> MAPK1 10.1007/s11055-016-0342-6  
 Regulation: TP53 ---> MAPK1 28573231 10.21010/ajtcam.v14i2.1610.21010/ajtcam.v14i2  
 Regulation: TP53 ---> MAPK1 208 10.1016/j.bbrc.2017.12.085  
 Regulation: TP53 ---> MAPK1 29852310 10.1016/j.bioorg.2018.05.02010.1016/j.bioorg.  
 Regulation: TP53 ---> MAPK1 29298131 10.1080/13510002.2017.1416773  
 Regulation: TP53 ---> MAPK1 28669336 10.2174/1568009617666170630124643  
 Regulation: TP53 ---> MAPK1 10.3390/ijms19123898  
 Regulation: TP53 ---> MAPK1 10.3892/or.2019.6964  
 Regulation: TP53 ---> MAPK1 31670863 10.1002/1878-0261.1259310.1002/1878-0261.1259  
 Regulation: TP53 ---> MAPK1 34947982 10.3390/ijms222413187  
 Regulation: TP53 ---> MAPK1 34749615 10.2174/1568026621666211105093658  
 Regulation: TP53 ---> MAPK1 10.55782/ane-2022-030  
 Regulation: TP53 ---> MAPK1 36589747 10.3389/fcell.2022.1049566  
 negative Regulation: TP53 ---| R# 30562482 10.1016/j.yexcr.2018.12.011  
 negative Regulation: TP53 ---| R# 12750388



negative Regulation: TP53 ---| R# 32275841 10.1080/15384101.2020.1749790  
 negative Regulation: TP53 ---| R# 32275841 10.1080/15384101.2020.1749790  
 negative Regulation: TP53 ---| R# 32275841 10.1080/15384101.2020.1749790  
 negative Regulation: TP53 ---| R# 32275841 10.1080/15384101.2020.1749790  
 negative Regulation: TP53 ---| R# 22745590 10.1593/neo.12352  
 negative Regulation: TP53 ---| R# 22888789 10.1186/1476-4598-11-54  
 negative Regulation: TP53 ---| R# 21391906  
 negative Regulation: TP53 ---| R# 26036474 10.1124/jpet.115.223610  
 negative Regulation: TP53 ---| R# 12578823 10.1074/jbc.M300341200  
 negative Regulation: TP53 ---| R# 28947497 10.1101/gad.301564.11710.1101/gad.301564.117  
 negative Regulation: TP53 ---| R# 34183772 10.1038/s41388-021-01921-3  
 negative Regulation: TP53 ---| R# 34183772 10.1038/s41388-021-01921-3  
 negative Regulation: TP53 ---| R# 34161151 10.1152/ajpcell.00142.2021  
 negative Regulation: TP53 ---| R# 91 10.1016/j.yexpr.2018.12.011  
 negative Regulation: TP53 ---| RAC1 10.1080/15384101.2019.1688951  
 negative Regulation: TP53 ---| RAC1 10.1080/15384101.2019.1688951  
 negative Regulation: TP53 ---| RAC1 10.1186/1476-4598-11-54  
 negative Regulation: TP53 ---| R# 34541899 10.1152/physrev.00045.2020  
 Expression: MAPK1 ---> TP53 27616194 10.1016/j.bbrc.2016.09.035  
 Expression: MAPK1 ---> TP53 27616194 10.1016/j.bbrc.2016.09.035  
 Expression: MAPK1 ---> TP53 26324703 10.1182/blood-2015-04-639138  
 Expression: MAPK1 ---> TP53 32315388 10.1182/blood.2019003538  
 Expression: MAPK1 ---> TP53 29477545 10.1016/j.brainres.2018.02.023  
 Expression: MAPK1 ---> TP53 33275947 10.1016/j.yexmp.2020.104587  
 Expression: MAPK1 ---> TP53 17244621 10.1074/jbc.M605649200  
 Expression: MAPK1 ---> TP53 21147777 10.1074/jbc.M110.175174  
 Expression: MAPK1 ---> TP53 28202289 10.1016/j.lfs.2017.02.005  
 Expression: MAPK1 ---> TP53 28558962 10.1016/j.taap.2017.05.034  
 Expression: MAPK1 ---> TP53 32660739 10.1016/j.blre.2020.100712  
 Expression: MAPK1 ---> TP53 29673545 10.1016/j.nutres.2017.12.011  
 Expression: MAPK1 ---> TP53 31201898 10.1016/j.fct.2019.05.052  
 Expression: MAPK1 ---> TP53 27461822 10.1016/j.prp.2016.06.005  
 Expression: MAPK1 ---> TP53 27638054 10.1016/j.tiv.2016.09.011  
 Expression: MAPK1 ---> TP53 31866342 10.1016/j.mcp.2019.101496  
 Expression: MAPK1 ---> TP53 10.1016/j.procbio.2018.12.010  
 Expression: MAPK1 ---> TP53 33187910 10.1016/j.intimp.2020.107158  
 Expression: MAPK1 ---> TP53 32075732 10.1016/j.celrep.2020.01.074  
 Expression: MAPK1 ---> TP53 33997178 10.1016/j.gendis.2019.12.009  
 Expression: MAPK1 ---> TP53 28844411 10.1016/j.ebiom.2017.08.018  
 Expression: MAPK1 ---> TP53 33997178 10.1016/j.gendis.2019.12.009  
 Expression: MAPK1 ---> TP53 20450891 10.1016/j.bcp.2010.04.029  
 Expression: MAPK1 ---> TP53 18272192 10.1016/j.taap.2007.12.028  
 Expression: MAPK1 ---> TP53 18272192 10.1016/j.taap.2007.12.028  
 Expression: MAPK1 ---> TP53 17337084 10.1016/j.lungcan.2007.01.027  
 Expression: MAPK1 ---> TP53 22252116 10.1016/j.canlet.2012.01.001  
 Expression: MAPK1 ---> TP53 15337531 10.1016/j.cellsig.2004.04.003  
 Expression: MAPK1 ---> TP53 16527552 10.1016/j.dld.2006.01.012  
 Expression: MAPK1 ---> TP53 22884810 10.1016/j.lfs.2012.07.027  
 Expression: MAPK1 ---> TP53 23603476 10.1016/j.tiv.2013.04.006  
 Expression: MAPK1 ---> TP53 23827354 10.1016/j.steroids.2013.06.005  
 Expression: MAPK1 ---> TP53 24094550 10.1016/j.ijcard.2013.08.076  
 Expression: MAPK1 ---> TP53 24094550 10.1016/j.ijcard.2013.08.076  
 Expression: MAPK1 ---> TP53 24035753 10.1016/j.toxlet.2013.09.002  
 Expression: MAPK1 ---> TP53 24548678 10.1016/j.toxlet.2014.02.006

Expression: MAPK1 ----> TP53 24792472 10.1016/j.jphotobiol.2014.03.015  
 Expression: MAPK1 ----> TP53 25043688 10.1016/j.biocel.2014.07.006  
 Expression: MAPK1 ----> TP53 25652123 10.1016/j.bbadis.2015.01.014  
 Expression: MAPK1 ----> TP53 26915871 10.1016/j.transproceed.2016.01.009  
 Expression: MAPK1 ----> TP53 21138557  
 Expression: MAPK1 ----> TP53 21138557  
 Expression: MAPK1 ----> TP53 17244621  
 Expression: MAPK1 ----> TP53 16000378  
 Expression: MAPK1 ----> TP53 15723837  
 Expression: MAPK1 ----> TP53 10958792  
 Expression: MAPK1 ----> TP53 12444545  
 Expression: MAPK1 ----> TP53 11420662  
 Expression: MAPK1 ----> TP53 11420662  
 Expression: MAPK1 ----> TP53 16507997  
 Expression: MAPK1 ----> TP53 10.14670/HH-11-88  
 Expression: MAPK1 ----> TP53 28587524 10.1089/ars.2017.7167  
 Expression: MAPK1 ----> TP53 29119536 10.1007/s12035-017-0814-x  
 Expression: MAPK1 ----> TP53 30208932 10.1186/s13058-018-1028-5  
 Expression: MAPK1 ----> TP53 30534001 10.1186/s12935-018-0692-y  
 Expression: MAPK1 ----> TP53 30538214 10.12659/MSM.911271  
 Expression: MAPK1 ----> TP53 30538214 10.12659/MSM.911271  
 Expression: MAPK1 ----> TP53 30538214 10.12659/MSM.911271  
 Expression: MAPK1 ----> TP53 30651129 10.1186/s13058-018-1071-2  
 Expression: MAPK1 ----> TP53 30569130 10.3892/or.2018.6926  
 Expression: MAPK1 ----> TP53 32003661 10.2174/1381612826666200128091506  
 Expression: MAPK1 ----> TP53 33562110 10.3390/i.jms22041653  
 Expression: MAPK1 ----> TP53 22466960 10.1254/jphs.11181FP  
 Expression: MAPK1 ----> TP53 22843228 10.1007/s10456-012-9289-6  
 Expression: MAPK1 ----> TP53 22843228 10.1007/s10456-012-9289-6  
 Expression: MAPK1 ----> TP53 22843228 10.1007/s10456-012-9289-6  
 Expression: MAPK1 ----> TP53 21239614 10.1210/me.2010-0424  
 Expression: MAPK1 ----> TP53 21239614 10.1210/me.2010-0424  
 Expression: MAPK1 ----> TP53 10.2174/1381612826666200128091506  
 Expression: MAPK1 ----> TP53 1050 10.1016/j.ebiom.2017.08.018  
 Expression: MAPK1 ----> TP53 10.1016/j.mcp.2019.101496  
 Expression: MAPK1 ----> TP53 10.1016/j.gendis.2019.12.009  
 Expression: MAPK1 ----> TP53 10.1186/s13058-018-1071-2  
 Expression: MAPK1 ----> TP53 10.3892/or.2018.6926  
 Expression: MAPK1 ----> TP53 21239614 10.1210/me.2010-0424  
 Expression: MAPK1 ----> TP53 21239614 10.1210/me.2010-0424  
 Expression: MAPK1 ----> TP53 21147777 10.1074/jbc.M110.175174  
 Expression: MAPK1 ----> TP53 21964832 10.3892/or.2011.1480  
 Expression: MAPK1 ----> TP53 21138557 10.1186/1476-4598-9-311  
 Expression: MAPK1 ----> TP53 21138557 10.1186/1476-4598-9-311  
 Expression: MAPK1 ----> TP53 23844043 10.1371/journal.pone.0067632  
 Expression: MAPK1 ----> TP53 24114360 10.1007/s10495-013-0913-8  
 Expression: MAPK1 ----> TP53 24866016 10.1371/journal.pone.0098113  
 Expression: MAPK1 ----> TP53 24866016 10.1371/journal.pone.0098113  
 Expression: MAPK1 ----> TP53 24806432 10.3892/i.jo.2014.2420  
 Expression: MAPK1 ----> TP53 24806432 10.3892/i.jo.2014.2420  
 Expression: MAPK1 ----> TP53 24806432 10.3892/i.jo.2014.2420  
 Expression: MAPK1 ----> TP53 25353185 10.1210/en.2014-1629  
 Expression: MAPK1 ----> TP53 23959801 10.1128/MCB.00021-13  
 Expression: MAPK1 ----> TP53 25962735 10.3892/or.2015.3923



Expression: MAPK1 ----> TP53 27196001 10.1371/journal.pone.0155893  
 Expression: MAPK1 ----> TP53 10547071  
 Expression: MAPK1 ----> TP53 11420662 10.1038/sj.onc.1204353  
 Expression: MAPK1 ----> TP53 15723837 10.1074/jbc.M412334200  
 Expression: MAPK1 ----> TP53 15899123  
 Expression: MAPK1 ----> TP53 20564491 10.1002/ptr.321410.1002/ptr.3214  
 Expression: MAPK1 ----> TP53 22843228 10.1007/s10456-012-9289-610.1007/s10456-012-9  
 Expression: MAPK1 ----> TP53 25146923 10.1038/cdd.2014.116  
 Expression: MAPK1 ----> TP53 21239614 10.1210/me.2010-0424  
 Expression: MAPK1 ----> TP53 21239614 10.1210/me.2010-042410.1210/me.2010-0424  
 Expression: MAPK1 ----> TP53 21239614 10.1210/me.2010-042410.1210/me.2010-0424  
 Expression: MAPK1 ----> TP53 27703489 10.1155/2016/6093783  
 Expression: MAPK1 ----> TP53 18154926 10.1016/j.brainres.2007.11.016  
 Expression: MAPK1 ----> TP53 23538210 10.1016/j.peptides.2013.03.023  
 Expression: MAPK1 ----> TP53 9417035  
 Expression: MAPK1 ----> TP53 21340650 10.1007/s00011-011-0316-7  
 Expression: MAPK1 ----> TP53 24078446 10.1007/s13277-013-1193-1  
 Expression: MAPK1 ----> TP53 25932965 10.1371/journal.pone.0125903  
 Expression: MAPK1 ----> TP53 20138958 10.1016/j.mce.2010.02.004  
 Expression: MAPK1 ----> TP53 23538210 10.1016/j.peptides.2013.03.023  
 Expression: MAPK1 ----> TP53 15150542  
 Expression: MAPK1 ----> TP53 21239614 10.1210/me.2010-0424  
 Expression: MAPK1 ----> TP53 22020547 10.3892/or.2011.1511  
 Expression: MAPK1 ----> TP53 25117830 10.1089/scd.2014.0058  
 Expression: MAPK1 ----> TP53 15899123  
 Expression: MAPK1 ----> TP53 24469921 10.1007/s11481-014-9523-7  
 Expression: MAPK1 ----> TP53  
 Expression: MAPK1 ----> TP53 29097252 10.1016/j.jep.2017.10.02610.1016/j.jep.2017.1  
 Expression: MAPK1 ----> TP53 29596872 10.1016/j.cellsig.2018.03.01310.1016/j.cellsi  
 Expression: MAPK1 ----> TP53 30226561 10.3892/or.2018.6703  
 Expression: MAPK1 ----> TP53 10.1016/j.intimp.2020.107158  
 Expression: MAPK1 ----> TP53 33402084 10.2174/1389557521666210105113831  
 Expression: MAPK1 ----> TP53 34992144 10.1158/1541-7786.MCR-21-014910.1158/1541-778  
 Expression: MAPK1 ----> TP53 35764642 10.1038/s41467-022-31418-w  
 Expression: MAPK1 ----> TP53 36165020 10.1134/S0026893322050089  
 Expression: MAPK1 ----> TP53 36005738 10.1080/15384101.2022.2108117  
 ProtModification: MAPK1 ----> TP53 29981726 10.1016/j.cbi.2018.07.005  
 ProtModification: MAPK1 ----> TP53 11409876 10.1006/bbrc.2001.5043  
 ProtModification: MAPK1 ----> TP53 16330547 10.1074/jbc.M507951200  
 ProtModification: MAPK1 ----> TP53 10781582 10.1074/jbc.M001020200  
 ProtModification: MAPK1 ----> TP53 11546806 10.1074/jbc.M105669200  
 ProtModification: MAPK1 ----> TP53 21147777 10.1074/jbc.M110.175174  
 ProtModification: MAPK1 ----> TP53 12890671 10.1074/jbc.M307149200  
 ProtModification: MAPK1 ----> TP53 11821415 10.1074/jbc.M111598200  
 ProtModification: MAPK1 ----> TP53 11689560 10.1074/jbc.M107231200  
 ProtModification: MAPK1 ----> TP53 10958792 10.1074/jbc.M004267200  
 ProtModification: MAPK1 ----> TP53 33141030 10.1016/j.freeradbiomed.2020.10.304  
 ProtModification: MAPK1 ----> TP53 33246174 10.1016/j.phrs.2020.105307  
 ProtModification: MAPK1 ----> TP53 12510016 10.1016/S1383-5742(02)00069-8  
 ProtModification: MAPK1 ----> TP53 27776972 10.1016/j.jbior.2016.10.001  
 ProtModification: MAPK1 ----> TP53 21679689 10.1016/j.bbrc.2011.06.016

ProtModification: MAPK1 ---> TP53:11996883 10.1016/S0006-2952(02)00908-5  
ProtModification: MAPK1 ---> TP53:15476743 10.1016/j.ejphar.2004.09.006  
ProtModification: MAPK1 ---> TP53:15212949 10.1016/j.yexcr.2004.03.033  
ProtModification: MAPK1 ---> TP53:15212949 10.1016/j.yexcr.2004.03.033  
ProtModification: MAPK1 ---> TP53:15212949 10.1016/j.yexcr.2004.03.033  
ProtModification: MAPK1 ---> TP53:20353787 10.1016/j.febslet.2010.03.040  
ProtModification: MAPK1 ---> TP53:10430472 10.1016/S0306-4522(99)00137-2  
ProtModification: MAPK1 ---> TP53:22627294 10.1016/j.tox.2012.05.013  
ProtModification: MAPK1 ---> TP53:22749133 10.1016/j.jnutbio.2012.01.012  
ProtModification: MAPK1 ---> TP53:23206596 10.1016/B978-0-12-398309-1.00005-6  
ProtModification: MAPK1 ---> TP53:25058905 10.1016/j.ejphar.2014.07.025  
ProtModification: MAPK1 ---> TP53:26751246 10.1016/j.exphem.2015.12.008  
ProtModification: MAPK1 ---> TP53:18847491  
ProtModification: MAPK1 ---> TP53:16330547  
ProtModification: MAPK1 ---> TP53:15899039  
ProtModification: MAPK1 ---> TP53:12890671 10.1074/jbc.M307149200  
ProtModification: MAPK1 ---> TP53:11821415  
ProtModification: MAPK1 ---> TP53:11689560  
ProtModification: MAPK1 ---> TP53:11546806 10.1074/jbc.M105669200  
ProtModification: MAPK1 ---> TP53:10958792  
ProtModification: MAPK1 ---> TP53:10958792 10.1074/jbc.M004267200  
ProtModification: MAPK1 ---> TP53:10958792  
ProtModification: MAPK1 ---> TP53:10781582  
ProtModification: MAPK1 ---> TP53:10212189  
ProtModification: MAPK1 ---> TP53:15750624  
ProtModification: MAPK1 ---> TP53:11896587  
ProtModification: MAPK1 ---> TP53:11426644  
ProtModification: MAPK1 ---> TP53:11314025  
ProtModification: MAPK1 ---> TP53:10602521  
ProtModification: MAPK1 ---> TP53:10602521  
ProtModification: MAPK1 ---> TP53 10.1007/s11055-016-0277-y  
ProtModification: MAPK1 ---> TP53:26497030 10.1007/s12035-015-9490-x  
ProtModification: MAPK1 ---> TP53:28533220 10.1128/MCB.00149-17  
ProtModification: MAPK1 ---> TP53 10.14670/HH-11-88  
ProtModification: MAPK1 ---> TP53:29405768 10.1177/0960327118755255  
ProtModification: MAPK1 ---> TP53:32641480 10.1128/JVI.00722-20  
ProtModification: MAPK1 ---> TP53:20664969 10.3892/or-00000903  
ProtModification: MAPK1 ---> TP53:20818156 10.4161/cc.9.17.12799  
ProtModification: MAPK1 ---> TP53:20085492 10.1089/ars.2009.2779  
ProtModification: MAPK1 ---> TP53:21147777 10.1074/jbc.M110.175174  
ProtModification: MAPK1 ---> TP53:22087839 10.2174/092986711798194388  
ProtModification: MAPK1 ---> TP53:23638878 10.1186/1476-4598-12-35  
ProtModification: MAPK1 ---> TP53:21901106 10.1371/journal.pgen.1002238  
ProtModification: MAPK1 ---> TP53:24806680 10.1523/JNEUROSCI.5119-13.2014  
ProtModification: MAPK1 ---> TP53:26408703  
ProtModification: MAPK1 ---> TP53:10602521 10.1038/sj.onc.1203137  
ProtModification: MAPK1 ---> TP53:11409876 10.1006/bbrc.2001.5043  
ProtModification: MAPK1 ---> TP53:11409876 10.1006/bbrc.2001.5043  
ProtModification: MAPK1 ---> TP53:11409876 10.1006/bbrc.2001.5043

ProtModification: MAPK1 ---> TP53:11409876 10.1006/bbrc.2001.5043  
 ProtModification: MAPK1 ---> TP53:15116093 10.1038/sj.onc.1207426  
 ProtModification: MAPK1 ---> TP53:28533220 10.1128/MCB.00149-1710.1128/MCB.00149-17  
 ProtModification: MAPK1 ---> TP53:10958792 10.1074/jbc.M004267200  
 ProtModification: MAPK1 ---> TP53:11821415 10.1074/jbc.M111598200  
 ProtModification: MAPK1 ---> TP53:11546806 10.1074/jbc.M105669200  
 ProtModification: MAPK1 ---> TP53:14734651 10.1242/jcs.00897  
 ProtModification: MAPK1 ---> TP53:15078887 10.1074/jbc.M312135200  
 ProtModification: MAPK1 ---> TP53:10781582 10.1074/jbc.M001020200  
 ProtModification: MAPK1 ---> TP53:12890671 10.1074/jbc.M307149200  
 ProtModification: MAPK1 ---> TP53:15116093 10.1038/sj.onc.1207426  
 ProtModification: MAPK1 ---> TP53:10547071  
 ProtModification: MAPK1 ---> TP53 10.1128/MCB.00149-17  
 ProtModification: MAPK1 ---> TP53  
 ProtModification: MAPK1 ---> TP53:11406180 10.1016/S0027-5107(01)00137-3  
 ProtModification: MAPK1 ---> TP53 10.1128/MCB.00149-17  
 ProtModification: MAPK1 ---> TP53:16970927 10.1016/j.bcp.2006.08.012  
 ProtModification: MAPK1 ---> TP53:19914607 10.1016/j.cellimm.2009.10.008  
 ProtModification: MAPK1 ---> TP53:19914607 10.1016/j.cellimm.2009.10.008  
 ProtModification: MAPK1 ---> TP53:21762708 10.1016/j.mrfmmm.2011.06.011  
 ProtModification: MAPK1 ---> TP53:15862828 10.1016/j.steroids.2005.03.001  
 ProtModification: MAPK1 ---> TP53:21262251 10.1016/j.taap.2011.01.011  
 ProtModification: MAPK1 ---> TP53:21262251 10.1016/j.taap.2011.01.011  
 ProtModification: MAPK1 ---> TP53:20036733 10.1016/j.freeradbiomed.2009.12.014  
 ProtModification: MAPK1 ---> TP53:10781582  
 ProtModification: MAPK1 ---> TP53:10781582  
 ProtModification: MAPK1 ---> TP53:10781582  
 ProtModification: MAPK1 ---> TP53:10781582  
 ProtModification: MAPK1 ---> TP53 10.1007/s11055-016-0277-y  
 ProtModification: MAPK1 ---> TP53:24944268 10.1152/ajprenal.00127.2014  
 ProtModification: MAPK1 ---> TP53:10781582 10.1074/jbc.M001020200  
 ProtModification: MAPK1 ---> TP53:27776972 10.1016/j.jbior.2016.10.001  
 ProtModification: MAPK1 ---> TP53:10547071  
 ProtModification: MAPK1 ---> TP53:11821415 10.1074/jbc.M111598200  
 ProtModification: MAPK1 ---> TP53  
 ProtModification: MAPK1 ---> TP53:14734651 10.1242/jcs.00897  
 ProtModification: MAPK1 ---> TP53:15078887 10.1074/jbc.M312135200  
 ProtModification: MAPK1 ---> TP53:21860418 10.1038/onc.2011.348  
 ProtModification: MAPK1 ---> TP53 10.1128/JVI.00722-20  
 ProtModification: MAPK1 ---> TP53:35477123 10.18632/aging.204038  
 ProtModification: MAPK1 ---> TP53:35807258 10.3390/molecules27134014  
 positive Expression: GPER1 --> N18262661 10.1016/j.tips.2008.01.001  
 positive Expression: GPER1 --> N19464786 10.1016/j.mce.2009.03.026  
 positive Expression: GPER1 --> N23545157 10.1016/j.mce.2013.03.018  
 positive Expression: GPER1 --> N14632195  
 positive Expression: GPER1 --> N24566361 10.1515/revneuro-2013-0055  
 positive Expression: GPER1 --> N22645130 10.1074/jbc.M112.341867  
 positive Expression: GPER1 --> N24859647 10.1016/j.mce.2014.05.008  
 positive Expression: GPER1 --> N19442754 10.1016/j.prostaglandins.2009.05.001  
 positive Expression: GPER1 --> N22645130 10.1074/jbc.M112.341867  
 positive Expression: GPER1 --> NGF  
 MolTransport: GPER1 ---> NGF 14632195  
 MolTransport: GPER1 ---> NGF 14632195  
 negative Expression: PTPRD ---| (35117921 10.21037/tcr-20-242510.21037/tcr-20-2425

negative Expression: PTPRD ---| (35117921 10.21037/tcr-20-242510.21037/tcr-20-2425  
 negative Expression: PTPRD ---| (35117921 10.21037/tcr-20-242510.21037/tcr-20-2425  
 negative Expression: PTPRD ---| (35117921 10.21037/tcr-20-242510.21037/tcr-20-2425  
 positive Expression: MAPK1 --> M1246 10.1016/j.apsb.2017.06.006  
 positive Expression: MAPK1 --> M21241747 10.1016/j.neures.2010.12.016  
 positive Expression: MAPK1 --> M17651887 10.1016/j.tox.2007.05.029  
 positive Expression: MAPK1 --> M23454433 10.1016/j.brainres.2013.02.026  
 positive Expression: MAPK1 --> M12925217  
 positive Expression: MAPK1 --> M17942717  
 positive Expression: MAPK1 --> M23182412 10.1017/S0007114512004710  
 positive Expression: MAPK1 --> M23207416 10.1159/000345043  
 positive Expression: MAPK1 --> M23000062 10.1016/j.neures.2012.09.001  
 positive Expression: MAPK1 --> M25957627 10.1007/s10266-015-0206-5  
 positive Expression: MAPK1 --> M29532850 10.3892/ijo.2018.4311  
 positive Expression: MAPK1 --> NGF 10.2478/s11756-018-0099-1  
 positive Expression: MAPK1 --> NGF 10.2478/s11756-018-0099-1  
 positive Expression: UCA1 --> SF33829718 10.18388/abp.2020\_5448  
 negative Regulation: B3GNT3 ---| 31968179 10.1089/dna.2019.5089  
 positive Expression: PTGS2 --> M14530048 10.1016/S0003-4975(03)00334-5  
 positive Expression: PTGS2 --> M16083714 10.1053/j.gastro.2005.06.003  
 positive Expression: PTGS2 --> M18722373 10.1053/j.gastro.2008.07.012  
 positive Expression: PTGS2 --> M19933775  
 positive Expression: PTGS2 --> M11585835  
 positive Expression: PTGS2 --> M11585835  
 positive Expression: PTGS2 --> M16528365  
 positive Expression: PTGS2 --> M26302803 10.2174/1389450116666150825113035  
 positive Expression: PTGS2 --> M29928066 10.1371/journal.ppat.1007100  
 positive Expression: PTGS2 --> M23393346  
 positive Expression: PTGS2 --> M11585835 10.1074/jbc.M107829200  
 positive Expression: PTGS2 --> M11585835 10.1074/jbc.M107829200  
 positive Expression: PTGS2 --> M16000874 10.1038/emmm.2005.27  
 positive Expression: PTGS2 --> M23393346  
 positive Expression: PTGS2 --> M24156425 10.7534/j.issn.1009-2137.2013.04.014  
 positive Expression: PTGS2 --> MCL1 10.2174/1389450116666150825113035  
 positive Expression: PTGS2 --> M21525012 10.1074/jbc.M110.207571  
 positive Expression: PTGS2 --> M16000874  
 positive Expression: PTGS2 --> MCL1  
 positive Expression: AKT1 --> PF18423396 10.1016/j.bbrc.2008.04.029  
 positive Expression: AKT1 --> PF19385085 10.1016/j.lfs.2009.01.018  
 positive Expression: AKT1 --> PF19385085 10.1016/j.lfs.2009.01.018  
 positive Expression: AKT1 --> PF21315734 10.1016/j.lfs.2011.02.001  
 positive Expression: AKT1 --> PPARG 10.1016/S0083-6729(03)01005-7  
 positive Expression: AKT1 --> PF21333731 10.1016/j.tiv.2011.02.004  
 positive Expression: AKT1 --> PF21840191 10.1016/j.jnutbio.2011.03.021  
 positive Expression: AKT1 --> PF21840191 10.1016/j.jnutbio.2011.03.021  
 positive Expression: AKT1 --> PPARG 10.1016/j.biocel.2012.03.019  
 positive Expression: AKT1 --> PPARG 10.1016/j.biocel.2012.03.019  
 positive Expression: AKT1 --> PF19782949 10.1016/j.biocel.2009.04.004

positive Expression: AKT1 --> PF22497928 10.1016/j.biocel.2012.03.019  
positive Expression: AKT1 --> PF22497928 10.1016/j.biocel.2012.03.019  
positive Expression: AKT1 --> PF25283330 10.1016/j.jnutbio.2014.07.007  
positive Expression: AKT1 --> PF26615875 10.1016/j.bbalip.2015.11.006  
positive Expression: AKT1 --> PF26940012 10.1016/j.yexcr.2016.02.019  
positive Expression: AKT1 --> PF27117918 10.1016/j.fct.2016.04.017  
positive Expression: AKT1 --> PF17540722  
positive Expression: AKT1 --> PF17312274  
positive Expression: AKT1 --> PF17312274  
positive Expression: AKT1 --> PF19221061  
positive Expression: AKT1 --> PF16407258  
positive Expression: AKT1 --> PF15545269  
positive Expression: AKT1 --> PF16478789  
positive Expression: AKT1 --> PF16478789  
positive Expression: AKT1 --> PF16478789  
positive Expression: AKT1 --> PF11717164  
positive Expression: AKT1 --> PF18388859  
positive Expression: AKT1 --> PF28840539 10.1007/s12272-017-0948-4  
positive Expression: AKT1 --> PF29283422 10.3390/i.jms19010090  
positive Expression: AKT1 --> PF29283422 10.3390/i.jms19010090  
positive Expression: AKT1 --> PF29899319 10.3390/i.jms19061760  
positive Expression: AKT1 --> PPARG 10.1096/fj.201700208RR  
positive Expression: AKT1 --> PF30250490 10.1155/2018/4573254  
positive Expression: AKT1 --> PF30176712 10.4014/jmb.1802.01065  
positive Expression: AKT1 --> PF30176712 10.4014/jmb.1802.01065  
positive Expression: AKT1 --> PPARG 10.21775/cimb.031.001  
positive Expression: AKT1 --> PPARG 10.21775/cimb.031.001  
positive Expression: AKT1 --> PPARG 10.21775/cimb.031.001  
positive Expression: AKT1 --> PF31295749 10.1055/a-0926-3991  
positive Expression: AKT1 --> PF21673026 10.1530/JOE-11-0175  
positive Expression: AKT1 --> PF23592774 10.1074/jbc.M113.459792  
positive Expression: AKT1 --> PF23746272 10.2174/09298673113209990136  
positive Expression: AKT1 --> PF23166699 10.1371/journal.pone.0049530  
positive Expression: AKT1 --> PF23936120 10.1371/journal.pone.0069925  
positive Expression: AKT1 --> PF23396401 10.2337/db12-1229  
positive Expression: AKT1 --> PF26295369 10.1210/en.2015-1184  
positive Expression: AKT1 --> PF26295369 10.1210/en.2015-1184  
positive Expression: AKT1 --> PF19191008 10.1007/s11010-009-0027-310.1007/s11010-009-0  
positive Expression: AKT1 --> PF19191008 10.1007/s11010-009-0027-310.1007/s11010-009-0  
positive Expression: AKT1 --> PF26615875 10.1016/j.bbalip.2015.11.00610.1016/j.bbalip.  
positive Expression: AKT1 --> PF27940057 10.1016/j.ejphar.2016.12.00610.1016/j.ejphar.  
positive Expression: AKT1 --> PF12782654  
positive Expression: AKT1 --> PF12782654

positive Expression: AKT1 --> PF 12782654  
positive Expression: AKT1 --> PF 26700098 10.1016/j.tips.2015.11.011  
positive Expression: AKT1 --> PF 26976717 10.1016/j.diff.2016.02.003  
positive Expression: AKT1 --> PF 17312274  
positive Expression: AKT1 --> PF 16478789  
positive Expression: AKT1 --> PF 21315734 10.1016/j.lfs.2011.02.001  
positive Expression: AKT1 --> PF 14597716  
positive Expression: AKT1 --> PF 11717164  
positive Expression: AKT1 --> PF 18388859  
positive Expression: AKT1 --> PF 11717164  
positive Expression: AKT1 --> PPARG  
positive Expression: AKT1 --> PF 33152931 10.1016/j.biopha.2020.11076910.1016/j.biopha.  
positive Expression: AKT1 --> PF 33199780 10.1038/s41467-020-19668-y  
positive Expression: AKT1 --> PF 32976570 10.1210/endocr/bqaa175  
positive Expression: AKT1 --> PF 33541789 10.1016/j.orcp.2021.01.003  
positive Expression: AKT1 --> PF 33712900 10.1007/s00431-021-03977-5  
positive Expression: AKT1 --> PF 34833928 10.3390/molecules26226836  
Expression: PPARG ---> BECN1 28433567 10.1016/j.neulet.2017.02.075  
Expression: PPARG ---> BECN1 26272430 10.1016/j.bbagen.2015.08.004  
Expression: PPARG ---> BECN1 26272430 10.1016/j.bbagen.2015.08.004  
Expression: PPARG ---> BECN1 27352979 10.1016/j.freeradbiomed.2016.06.023  
Expression: PPARG ---> BECN1 26790955 10.1016/j.yexcr.2016.01.004  
Expression: PPARG ---> BECN1 21700710 10.1074/jbc.M111.273292  
Expression: PPARG ---> BECN1 23574724 10.4161/cc.24289  
Expression: PPARG ---> BECN1 23574724 10.4161/cc.24289  
Expression: PPARG ---> BECN1 21700710 10.1074/jbc.M111.273292  
Expression: PPARG ---> BECN1 35944278 10.1089/dna.2022.0087  
Regulation: PAX8 ---> PTEN 26138515 10.1016/j.ctrv.2015.06.005  
Regulation: PAX8 ---> PTEN 29367766 10.1038/s41388-017-0097-8  
Regulation: PAX8 ---> PTEN 29367766 10.1038/s41388-017-0097-8  
positive Expression: PTEN --> P 31807182 10.3892/ol.2019.1102810.3892/ol.2019.11028  
positive Expression: PTEN --> P 31807182 10.3892/ol.2019.1102810.3892/ol.2019.11028  
positive Expression: NGF --> N0129991107 10.3340/jkns.2017.021910.3340/jkns.2017.0219  
positive Expression: NGF --> N0129991107 10.3340/jkns.2017.021910.3340/jkns.2017.0219  
positive Expression: NOTCH1 --> 17141050 10.1016/S0076-6879(06)19002-3  
positive Expression: NOTCH1 --> 22249262 10.1038/onc.2011.615  
positive Expression: NOTCH1 --> 23872918 10.1038/cmi.2013.22  
positive Expression: NOTCH1 --> 25231743 10.1038/leu.2014.276  
positive Expression: NOTCH1 --> 23872918 10.1038/cmi.2013.22  
positive Expression: NOTCH1 --> 23872918 10.1038/cmi.2013.22  
positive Expression: NOTCH1 --> 23872918 10.1038/cmi.2013.22  
positive Expression: NOTCH1 --> 26041884  
positive Expression: NOTCH1 --> 26041884

positive Expression: NOTCH1 --> 26041884  
positive Expression: NOTCH1 --> 26041884  
positive Expression: NOTCH1 --> 30224339 10.1158/1078-0432.CCR-18-086710.1158/1078-043  
Expression: TP53 ---> PPP1R3C 23837542 10.1089/dna.2013.2084  
Expression: TP53 ---> PPP1R3C 23837542 10.1089/dna.2013.2084  
Expression: TP53 ---> PPP1R3C  
DirectRegulation: ING4 ---> TP53 21177815 10.1128/JVI.02279-10  
DirectRegulation: ING4 ---> TP53 25792601 10.1101/gad.254292.114  
DirectRegulation: ING4 ---> TP53 25792601 10.1101/gad.254292.114  
DirectRegulation: ING4 ---> TP53 24581166 10.3779/j.issn.1009-3419.2014.02.13  
DirectRegulation: ING4 ---> TP53 23967213 10.1371/journal.pone.0071453  
DirectRegulation: ING4 ---> TP53 21454715 10.1074/jbc.M111.230961  
DirectRegulation: ING4 ---> TP53 21052543 10.1155/2011/963614  
DirectRegulation: ING4 ---> TP53 34116679 10.1186/s12943-021-01373-z  
DirectRegulation: ING4 ---> TP53 33299127 10.1038/s41374-020-00516-y  
DirectRegulation: ING4 ---> TP53 33076322 10.3390/ijsms21207622  
DirectRegulation: ING4 ---> TP53 32079300 10.3390/ijsms21041351  
DirectRegulation: ING4 ---> TP53 30643005 10.1042/BSR20180773  
DirectRegulation: ING4 ---> TP53 30403588 10.14715/cmb/2018.64.13.2  
DirectRegulation: ING4 ---> TP53 27466989  
DirectRegulation: ING4 ---> TP53 28050784 10.1007/s10620-016-4429-2  
DirectRegulation: ING4 ---> TP53 27544390 10.1007/s00432-016-2219-z  
DirectRegulation: ING4 ---> TP53 27544390 10.1007/s00432-016-2219-z  
DirectRegulation: ING4 ---> TP53 26803518 10.1007/s13277-016-4842-3

DirectRegulation: ING4 ---> TP53 16024799  
DirectRegulation: ING4 ---> TP53 17646389  
DirectRegulation: ING4 ---> TP53 16520380  
DirectRegulation: ING4 ---> TP53 26072331 10.1016/j.expchem.2015.05.010  
DirectRegulation: ING4 ---> TP53 24333729 10.1016/j.canlet.2013.11.016  
DirectRegulation: ING4 ---> TP53 23603392 10.1016/j.febslet.2013.04.004  
DirectRegulation: ING4 ---> TP53 23603392 10.1016/j.febslet.2013.04.004  
DirectRegulation: ING4 ---> TP53 15743678 10.1016/j.biocel.2004.09.008  
DirectRegulation: ING4 ---> TP53 22366145 10.1016/j.jbspin.2012.01.008  
DirectRegulation: ING4 ---> TP53 22366145 10.1016/j.jbspin.2012.01.008  
DirectRegulation: ING4 ---> TP53 18571892 10.1016/j.biopha.2008.04.006  
DirectRegulation: ING4 ---> TP53 14572637 10.1016/S0014-5793(03)01024-X  
DirectRegulation: ING4 ---> TP53 18775696 10.1016/j.yexcr.2008.08.002  
DirectRegulation: ING4 ---> TP53 18775696 10.1016/j.yexcr.2008.08.002  
DirectRegulation: ING4 ---> TP53 15748897 10.1016/j.yexcr.2004.11.023  
DirectRegulation: ING4 ---> TP53 15882981 10.1016/j.bbrc.2005.04.023  
DirectRegulation: ING4 ---> TP53 28844713 10.1016/j.canlet.2017.08.019  
DirectRegulation: ING4 ---> TP53 21454715 10.1074/jbc.M111.230961  
DirectRegulation: ING4 ---> TP53 16520380 10.1074/jbc.M511309200  
DirectRegulation: ING4 ---> TP53 15882981 10.1016/j.bbrc.2005.04.023  
DirectRegulation: ING4 ---> TP53 15882981 10.1016/j.bbrc.2005.04.023  
DirectRegulation: ING4 ---> TP53 15882981 10.1016/j.bbrc.2005.04.023  
DirectRegulation: ING4 ---> TP53 12750254  
DirectRegulation: ING4 ---> TP53 12750254  
DirectRegulation: ING4 ---> TP53 26530780 10.3892/or.2015.4385  
DirectRegulation: ING4 ---> TP53 21177815 10.1128/JVI.02279-10  
DirectRegulation: ING4 ---> TP53 23967213 10.1371/journal.pone.0071453  
DirectRegulation: ING4 ---> TP53 23969950 10.3892/or.2013.2671  
DirectRegulation: ING4 ---> TP53 20534538 10.1073/pnas.0912116107  
DirectRegulation: ING4 ---> TP53 22228137 10.1007/s00432-011-1099-5  
DirectRegulation: ING4 ---> TP53 21454715 10.1074/jbc.M111.230961  
DirectRegulation: ING4 ---> TP53 21454715 10.1074/jbc.M111.230961



DirectRegulation: ING4 ---> TP53 30643005 10.1042/BSR20180773  
DirectRegulation: ING4 ---> TP53 29489009 10.14670/HH-11-979  
DirectRegulation: ING4 ---> TP53 27544390 10.1007/s00432-016-2219-z  
DirectRegulation: ING4 ---> TP53 17954561  
DirectRegulation: ING4 ---> TP53 17954561  
DirectRegulation: ING4 ---> TP53 15528276  
DirectRegulation: ING4 ---> TP53 20534538  
DirectRegulation: ING4 ---> TP53 16520380  
DirectRegulation: ING4 ---> TP53 23603392 10.1016/j.febslet.2013.04.004  
DirectRegulation: ING4 ---> TP53 19903538 10.1016/j.arr.2009.11.001  
DirectRegulation: ING4 ---> TP53 16387653 10.1016/j.molcel.2005.12.007  
DirectRegulation: ING4 ---> TP53 15935570 10.1016/j.gene.2005.02.014  
DirectRegulation: ING4 ---> TP53 15251430 10.1016/j.febslet.2004.06.010  
DirectRegulation: ING4 ---> TP53 15251430 10.1016/j.febslet.2004.06.010  
DirectRegulation: ING4 ---> TP53 18775696 10.1016/j.yexcr.2008.08.002  
DirectRegulation: ING4 ---> TP53 18775696 10.1016/j.yexcr.2008.08.002  
DirectRegulation: ING4 ---> TP53 15748897 10.1016/j.yexcr.2004.11.023  
DirectRegulation: ING4 ---> TP53 15882981 10.1016/j.bbrc.2005.04.023  
DirectRegulation: ING4 ---> TP53 21454715 10.1074/jbc.M111.230961  
DirectRegulation: ING4 ---> TP53 21454715 10.1074/jbc.M111.230961  
DirectRegulation: ING4 ---> TP53 16520380 10.1074/jbc.M511309200  
DirectRegulation: ING4 ---> TP53 23967213 10.1371/journal.pone.007145310.1371/journal.p  
DirectRegulation: ING4 ---> TP53 21454715 10.1074/jbc.M111.23096110.1074/jbc.M111.23096  
DirectRegulation: ING4 ---> TP53 21454715 10.1074/jbc.M111.23096110.1074/jbc.M111.23096  
DirectRegulation: ING4 ---> TP53 21454715 10.1074/jbc.M111.23096110.1074/jbc.M111.23096  
DirectRegulation: ING4 ---> TP53 21177815 10.1128/JVI.02279-1010.1128/JVI.02279-10  
DirectRegulation: ING4 ---> TP53 34261347 10.1161/CIRCRESAHA.120.318364  
DirectRegulation: ING4 ---> TP53 34569542 10.1159/000518414  
DirectRegulation: ING4 ---> TP53 34569542 10.1159/000518414  
positive Expression: ING4 --> TF 33433356 10.1016/j.biopha.2020.111078  
positive Expression: ING4 --> TF 22436625 10.1016/j.humpath.2011.11.018  
positive Expression: ING4 --> TF 26803518 10.1007/s13277-016-4842-3  
positive Expression: ING4 --> TF 19895734  
positive Expression: ING4 --> TF 23967213 10.1371/journal.pone.0071453  
positive Expression: ING4 --> TF 23967213 10.1371/journal.pone.0071453  
positive Expression: ING4 --> TF 21177815 10.1128/JVI.02279-10  
positive Expression: ING4 --> TF 17594054 10.1007/s11060-007-9421-4  
positive Expression: ING4 --> TF 19895734 10.5732/cjc.009.10311  
positive Expression: ING4 --> TF 27806345 10.18632/oncotarget.1298410.18632/oncotarget.  
positive Expression: ING4 --> TF 23603392 10.1016/j.febslet.2013.04.004  
positive Expression: ING4 --> TF 27421660 10.1093/abbs/gmw06210.1093/abbs/gmw062  
positive Expression: ING4 --> TF 23603392 10.1016/j.febslet.2013.04.004  
positive Expression: ING4 --> TP53  
positive Expression: ING4 --> TF 35075768 10.1111/jcmm.1719210.1111/jcmm.17192  
positive Expression: NOTCH1 --> 28677782 10.3892/mmr.2017.6878  
positive Expression: NOTCH1 --> 28677782 10.3892/mmr.2017.687810.3892/mmr.2017.6878



ProtModification: AKT1 ---> PRPH 18502206 10.1016/j.febslet.2008.04.064  
 ProtModification: AKT1 ---> PRPH 17569669  
 ProtModification: AKT1 ---> PRPH 17569669 10.1074/jbc.M611703200  
 ProtModification: AKT1 ---> PRPH 36499746 10.3390/ijms232315416  
 Binding: BECN1 ---- RAC1 22393062 10.1074/jbc.M112.348375  
 negative Regulation: PPARG ---| F18209083  
 negative Regulation: PPARG ---| RAC1  
 positive Expression: RAC1 --> BF32913260 10.1038/s41419-020-02951-7  
 positive Expression: RAC1 --> BF32913260 10.1038/s41419-020-02951-7  
 positive Expression: RAC1 --> BF32913260 10.1038/s41419-020-02951-710.1038/s41419-020-  
 positive Regulation: GPER1 --> M30360801 10.1016/j.amjms.2018.06.009  
 positive Regulation: GPER1 --> M29964007 10.1016/j.yhbeh.2018.06.012  
 positive Regulation: GPER1 --> M15090535 10.1074/jbc.M403588200  
 positive Regulation: GPER1 --> M29378226 10.1016/j.steroids.2018.01.010  
 positive Regulation: GPER1 --> M33711400 10.1016/j.neuint.2021.105011  
 positive Regulation: GPER1 --> M27519631 10.1016/j.mce.2016.08.011  
 positive Regulation: GPER1 --> M27940299 10.1016/j.mce.2016.12.007  
 positive Regulation: GPER1 --> M27940299 10.1016/j.mce.2016.12.007  
 positive Regulation: GPER1 --> M27773847 10.1016/j.mce.2016.10.020  
 positive Regulation: GPER1 --> M27773847 10.1016/j.mce.2016.10.020  
 positive Regulation: GPER1 --> M28736254 10.1016/j.mce.2017.07.016  
 positive Regulation: GPER1 --> M32777349 10.1016/j.neulet.2020.135299  
 positive Regulation: GPER1 --> M32325111 10.1016/j.tiv.2020.104871  
 positive Regulation: GPER1 --> M32325111 10.1016/j.tiv.2020.104871  
 positive Regulation: GPER1 --> M32325111 10.1016/j.tiv.2020.104871  
 positive Regulation: GPER1 --> M27369115 10.1016/j.jsbmb.2016.06.014  
 positive Regulation: GPER1 --> M28465157 10.1016/j.jsbmb.2017.04.012  
 positive Regulation: GPER1 --> M28465157 10.1016/j.jsbmb.2017.04.012  
 positive Regulation: GPER1 --> M26482875 10.1016/j.tem.2015.09.002  
 positive Regulation: GPER1 --> M26482875 10.1016/j.tem.2015.09.002  
 positive Regulation: GPER1 --> M27423484 10.1016/j.jphs.2016.06.005  
 positive Regulation: GPER1 --> M33161112 10.1016/j.etap.2020.103544  
 positive Regulation: GPER1 --> M31394165 10.1016/j.bbalip.2019.08.001  
 positive Regulation: GPER1 --> M32791253 10.1016/j.cbpc.2020.108868  
 positive Regulation: GPER1 --> M20875808 10.1016/j.brainres.2010.09.069  
 positive Regulation: GPER1 --> M22285849 10.1016/j.steroids.2011.12.023  
 positive Regulation: GPER1 --> M22198527 10.1016/j.steroids.2011.11.011  
 positive Regulation: GPER1 --> M17011908 10.1016/j.surg.2006.07.007  
 positive Regulation: GPER1 --> M11744082 10.1016/S0165-0173(01)00114-X

positive Regulation: GPER1 --> M17931703 10.1016/j.brainresrev.2007.07.020  
positive Regulation: GPER1 --> M17222505 10.1016/j.mce.2006.12.010  
positive Regulation: GPER1 --> M20138962 10.1016/j.mce.2010.02.006  
positive Regulation: GPER1 --> M20138962 10.1016/j.mce.2010.02.006  
positive Regulation: GPER1 --> M20138962 10.1016/j.mce.2010.02.006  
positive Regulation: GPER1 --> M18556135 10.1016/j.neuroscience.2008.05.001  
positive Regulation: GPER1 --> M11897506 10.1016/S0960-0760(01)00190-X  
positive Regulation: GPER1 --> M16019207 10.1016/j.jsbmb.2005.05.006  
positive Regulation: GPER1 --> M19442754 10.1016/j.prostaglandins.2009.05.001  
positive Regulation: GPER1 --> M19442754 10.1016/j.prostaglandins.2009.05.001  
positive Regulation: GPER1 --> M22917634 10.1016/j.steroids.2012.07.019  
positive Regulation: GPER1 --> M23219795 10.1016/j.ejphar.2012.11.042  
positive Regulation: GPER1 --> M23385013 10.1016/j.steroids.2012.12.015  
positive Regulation: GPER1 --> M23402905 10.1016/j.ygyno.2013.02.005  
positive Regulation: GPER1 --> M23085545 10.1016/j.brainresbull.2012.10.004  
positive Regulation: GPER1 --> M23466742 10.1016/j.phrs.2013.02.008  
positive Regulation: GPER1 --> M23545157 10.1016/j.mce.2013.03.018  
positive Regulation: GPER1 --> M23419549 10.1016/j.neuroscience.2013.02.005  
positive Regulation: GPER1 --> M24161432 10.1016/j.cbi.2013.10.014  
positive Regulation: GPER1 --> M24240011 10.1016/j.steroids.2013.11.004  
positive Regulation: GPER1 --> M24240011 10.1016/j.steroids.2013.11.004  
positive Regulation: GPER1 --> M24240011 10.1016/j.steroids.2013.11.004  
positive Regulation: GPER1 --> M24239983 10.1016/j.mce.2013.11.005  
positive Regulation: GPER1 --> M23907016 10.1016/j.jsbmb.2013.07.011  
positive Regulation: GPER1 --> M23907016 10.1016/j.jsbmb.2013.07.011  
positive Regulation: GPER1 --> M23907016 10.1016/j.jsbmb.2013.07.011  
positive Regulation: GPER1 --> M24560890 10.1016/j.yhbeh.2014.02.004  
positive Regulation: GPER1 --> M24560890 10.1016/j.yhbeh.2014.02.004  
positive Regulation: GPER1 --> M24530924 10.1016/j.mce.2014.02.002  
positive Regulation: GPER1 --> M24594140 10.1016/j.mce.2014.01.024  
positive Regulation: GPER1 --> M24495410 10.1016/j.toxlet.2014.01.035  
positive Regulation: GPER1 --> M25263582 10.1016/j.expneurol.2014.09.011  
positive Regulation: GPER1 --> M25173820 10.1016/j.steroids.2014.08.013  
positive Regulation: GPER1 --> M29365274 10.1152/AJPCELL.00152.2017  
positive Regulation: GPER1 --> M29365274 10.1152/AJPCELL.00152.2017  
positive Regulation: GPER1 --> M34445359 10.3390/ijms22168654  
positive Regulation: GPER1 --> M34182071 10.1016/j.freeradbiomed.2021.06.02510.1016/j.  
positive Regulation: GPER1 --> M22251451 10.1186/bcr3096  
positive Regulation: GPER1 --> M19741198 10.1152/ajpcell.00185.200910.1152/ajpcell.001  
positive Regulation: GPER1 --> M852 10.1016/j.jphs.2016.06.005  
positive Regulation: GPER1 --> MAPK1 10.1016/j.steroids.2011.12.023  
positive Regulation: GPER1 --> M24835924 10.1016/j.mce.2014.05.005  
positive Regulation: GPER1 --> M25150623 10.1016/j.mce.2014.07.023  
positive Regulation: GPER1 --> M25150623 10.1016/j.mce.2014.07.023  
positive Regulation: GPER1 --> M25150623 10.1016/j.mce.2014.07.023  
positive Regulation: GPER1 --> M25312822 10.1016/j.biopha.2014.09.003  
positive Regulation: GPER1 --> M24930125 10.1016/j.etap.2014.05.007  
positive Regulation: GPER1 --> M26006730 10.1016/j.taap.2015.05.010  
positive Regulation: GPER1 --> MAPK1 10.1016/j.biopha.2015.07.031  
positive Regulation: GPER1 --> M25766520 10.1016/j.jsbmb.2015.02.008  
positive Regulation: GPER1 --> M17308128 10.1158/0008-5472.CAN-06-2909  
positive Regulation: GPER1 --> M20138962 10.1016/j.mce.2010.02.00610.1016/j.mce.2010.0  
positive Regulation: GPER1 --> M23907016 10.1016/j.jsbmb.2013.07.01110.1016/j.jsbmb.20  
positive Regulation: GPER1 --> M25847233 10.1074/jbc.M114.62874310.1074/jbc.M114.62874





positive Regulation: GPER1 --> M12446589  
positive Regulation: GPER1 --> M12193550  
positive Regulation: GPER1 --> M12193550  
positive Regulation: GPER1 --> M11773440  
positive Regulation: GPER1 --> M11043579  
positive Regulation: GPER1 --> M9973260  
positive Regulation: GPER1 --> M19818165  
positive Regulation: GPER1 --> M18768737  
positive Regulation: GPER1 --> M18768737  
positive Regulation: GPER1 --> M16636149  
positive Regulation: GPER1 --> M15090535  
positive Regulation: GPER1 --> M15090535  
positive Regulation: GPER1 --> M11029403  
positive Regulation: GPER1 --> M19357782  
positive Regulation: GPER1 --> M19079715  
positive Regulation: GPER1 --> M22414008  
positive Regulation: GPER1 --> M22495674 10. 1210/en. 2012-1061  
positive Regulation: GPER1 --> MAPK1  
positive Regulation: GPER1 --> M23163984 10. 1186/1757-2215-5-35  
positive Regulation: GPER1 --> M23163984 10. 1186/1757-2215-5-35  
positive Regulation: GPER1 --> M23232940 10. 3892/or. 2012. 2180  
positive Regulation: GPER1 --> M23273253 10. 1186/1471-2407-12-624  
positive Regulation: GPER1 --> M19818165 10. 1186/bcr2361  
positive Regulation: GPER1 --> M21149639 10. 1124/mol. 110. 069500  
positive Regulation: GPER1 --> M21303939 10. 1210/en. 2010-1368  
positive Regulation: GPER1 --> M21372633 10. 4161/cbt. 11. 8. 15272  
positive Regulation: GPER1 --> M21673097 10. 1210/en. 2011-0091  
positive Regulation: GPER1 --> M22355098 10. 1530/JME-11-0145  
positive Regulation: GPER1 --> MAPK1 10. 1186/bcr3096  
positive Regulation: GPER1 --> MAPK1 10. 1186/bcr3096  
positive Regulation: GPER1 --> M21930911 10. 1073/pnas. 1102821108  
positive Regulation: GPER1 --> M20661136 10. 1097/FBP. 0b013e32833da5c3  
positive Regulation: GPER1 --> M21242460 10. 1161/HYPERTENSIONAHA. 110. 161653  
positive Regulation: GPER1 --> M21242460 10. 1161/HYPERTENSIONAHA. 110. 161653  
positive Regulation: GPER1 --> M21242460 10. 1161/HYPERTENSIONAHA. 110. 161653  
positive Regulation: GPER1 --> M21242460 10. 1161/HYPERTENSIONAHA. 110. 161653  
positive Regulation: GPER1 --> M21482958 10. 1161/HYPERTENSIONAHA. 110. 159459  
positive Regulation: GPER1 --> M21536991 10. 1161/HYPERTENSIONAHA. 110. 167650

positive Regulation: GPER1 --> M23460719 10.1210/er.2012-1055  
positive Regulation: GPER1 --> M23756388  
positive Regulation: GPER1 --> M23610132 10.1210/en.2012-2119  
positive Regulation: GPER1 --> M23519092 10.1097/MED.0b013e328360c200  
positive Regulation: GPER1 --> M23590758 10.2174/1566524011313060015  
positive Regulation: GPER1 --> M23590758 10.2174/1566524011313060015  
positive Regulation: GPER1 --> M20203690 10.1038/cdd.2010.20  
positive Regulation: GPER1 --> M22167233 10.1038/jcbfm.2011.179  
positive Regulation: GPER1 --> M22492045 10.1523/JNEUROSCI.5828-11.2012  
positive Regulation: GPER1 --> M22552965 10.1289/ehp.1104526  
positive Regulation: GPER1 --> M22552965 10.1289/ehp.1104526  
positive Regulation: GPER1 --> M22552965 10.1289/ehp.1104526  
positive Regulation: GPER1 --> M23840305 10.1371/journal.pone.0064771  
positive Regulation: GPER1 --> M24136233 10.1038/cddis.2013.397  
positive Regulation: GPER1 --> M24343167 10.1007/s11906-013-0408-6  
positive Regulation: GPER1 --> M24481325 10.1530/ERC-13-0237  
positive Regulation: GPER1 --> M25251996 10.1146/annurev-pharmtox-010814-124302  
positive Regulation: GPER1 --> M23283935 10.1152/ajpccell.00203.2012  
positive Regulation: GPER1 --> M25005496 10.1152/ajpendo.00534.2013  
positive Regulation: GPER1 --> M25012534 10.1159/000365574  
positive Regulation: GPER1 --> M25275589 10.1038/cddis.2014.398  
positive Regulation: GPER1 --> MAPK1  
positive Regulation: GPER1 --> MAPK1 10.1074/jbc.M114.628743  
positive Regulation: GPER1 --> MAPK1 10.1074/jbc.M114.628743  
positive Regulation: GPER1 --> MAPK1 10.1074/jbc.M114.628743  
positive Regulation: GPER1 --> M25763610 10.1210/me.2015-1009  
positive Regulation: GPER1 --> M26023144 10.1124/pr.114.009712  
positive Regulation: GPER1 --> M26023144 10.1124/pr.114.009712  
positive Regulation: GPER1 --> M10988335  
positive Regulation: GPER1 --> M11043579  
positive Regulation: GPER1 --> M15090535  
positive Regulation: GPER1 --> M16644474  
positive Regulation: GPER1 --> M20875696 10.1016/j.envpol.2010.09.004  
positive Regulation: GPER1 --> M20875696 10.1016/j.envpol.2010.09.004  
positive Regulation: GPER1 --> M21278053 10.1093/toxsci/kfr019  
positive Regulation: GPER1 --> M21303939 10.1210/en.2010-1368  
positive Regulation: GPER1 --> M24782323 10.1002/glia.22679  
positive Regulation: GPER1 --> M25753185 10.1002/cbf.3097  
positive Regulation: GPER1 --> M25805831 10.1096/fj.14-265603  
positive Regulation: GPER1 --> MAPK1



positive Regulation: GPER1 --> M26069273 10.1530/JME-15-0086  
 positive Regulation: GPER1 --> M26921679 10.1016/j.steroids.2016.02.016  
 positive Regulation: GPER1 --> M26954778 10.1159/000445190  
 positive Regulation: GPER1 --> M26987903 10.1074/jbc.M115.697334  
 positive Regulation: GPER1 --> MAPK1 10.1074/jbc.M115.697334  
 positive Regulation: GPER1 --> M27213340 10.3390/ijms17050760  
 positive Regulation: GPER1 --> M26475489 10.1007/s00204-015-1615-5  
 positive Regulation: GPER1 --> M27589731 10.3390/ijms17091434  
 positive Regulation: GPER1 --> M27589731 10.3390/ijms17091434  
 positive Regulation: GPER1 --> MAPK1 10.1042/BSR20160134  
 positive Regulation: GPER1 --> M29515057 10.1262/jrd.2017-153  
 positive Regulation: GPER1 --> M32297302 10.1007/s12035-020-01911-8  
 positive Regulation: GPER1 --> M32297302 10.1007/s12035-020-01911-8  
 positive Regulation: GPER1 --> M33097048 10.1186/s12974-020-01998-9  
 positive Regulation: GPER1 --> M33287384 10.3390/ijms21239229  
 positive Regulation: GPER1 --> M29137141 10.3390/ijms18112394  
 positive Regulation: GPER1 --> M33430254 10.3390/ijms22020525  
 positive Regulation: GPER1 --> M34098945 10.1186/s12935-021-02003-w  
 positive Regulation: GPER1 --> M32570260 10.1159/000509583  
 positive Regulation: GPER1 --> M34182538 10.18632/aging.203145  
 positive Regulation: GPER1 --> M34830207 10.3390/ijms222212326  
 positive Regulation: GPER1 --> M36558071 10.3390/molecules27248943  
 positive Regulation: GPER1 --> M36558071 10.3390/molecules27248943  
 positive Regulation: GPER1 --> M36558071 10.3390/molecules27248943  
 negative Regulation: GPER1 ---| F34330822 10.1124/MOLPHARM.121.000259  
 negative Regulation: GPER1 ---| F34330822 10.1124/MOLPHARM.121.000259  
 positive Regulation: STC2 --> M25816401 10.1177/0394632015572745  
 positive Regulation: STC2 --> M23187001  
 positive Regulation: STC2 --> M27878259 10.3892/mmr.2016.595110.3892/mmr.2016.5951  
 positive Regulation: STC2 --> M27878259 10.3892/mmr.2016.595110.3892/mmr.2016.5951  
 Regulation: PPARG ---> AKT1 26220473 10.1016/j.brainres.2015.07.025  
 Regulation: PPARG ---> AKT1 27373852 10.1016/j.ejphar.2016.06.051  
 Regulation: PPARG ---> AKT1 27725163 10.1016/j.yexmp.2016.10.002  
 Regulation: PPARG ---> AKT1 29080795 10.1016/j.yexcr.2017.10.024  
 Regulation: PPARG ---> AKT1 12048207 10.1074/jbc.M203913200  
 Regulation: PPARG ---> AKT1 20212046 10.1074/jbc.M109.087718  
 Regulation: PPARG ---> AKT1 20212046 10.1074/jbc.M109.087718  
 Regulation: PPARG ---> AKT1 20212046 10.1074/jbc.M109.087718  
 Regulation: PPARG ---> AKT1 22223859 10.1194/jlcr.M017319  
 Regulation: PPARG ---> AKT1 31786192 10.1016/j.lfs.2019.117108  
 Regulation: PPARG ---> AKT1 32209360 10.1016/j.metabol.2020.154215  
 Regulation: PPARG ---> AKT1 29655655 10.1016/j.npep.2018.04.002  
 Regulation: PPARG ---> AKT1 31163220 10.1016/j.fct.2019.05.060  
 Regulation: PPARG ---> AKT1 31163220 10.1016/j.fct.2019.05.060  
 Regulation: PPARG ---> AKT1 32919185 10.1016/j.nut.2020.110968  
 Regulation: PPARG ---> AKT1 24269521 10.1016/j.pupt.2013.11.003  
 Regulation: PPARG ---> AKT1 24269521 10.1016/j.pupt.2013.11.003  
 Regulation: PPARG ---> AKT1 24269521 10.1016/j.pupt.2013.11.003  
 Regulation: PPARG ---> AKT1 29522896 10.1016/j.bbalip.2018.03.001

Regulation: PPARG ----> AKT1 30134163 10.1016/j.celrep.2018.07.063  
 Regulation: PPARG ----> AKT1 10.1016/S0006-291X(02)02983-2  
 Regulation: PPARG ----> AKT1 15369766 10.1016/j.bbrc.2004.08.101  
 Regulation: PPARG ----> AKT1 10.1016/S0014-5793(01)02674-6  
 Regulation: PPARG ----> AKT1 21974806 10.1016/j.canlet.2011.09.010  
 Regulation: PPARG ----> AKT1 17548167 10.1016/j.mehy.2006.12.064  
 Regulation: PPARG ----> AKT1 18950730 10.1016/j.biocel.2008.09.022  
 Regulation: PPARG ----> AKT1 23562554 10.1016/j.bbagen.2013.03.029  
 Regulation: PPARG ----> AKT1 24094981 10.1016/j.mehy.2013.08.014  
 Regulation: PPARG ----> AKT1 24856644 10.1016/j.thromres.2014.05.005  
 Regulation: PPARG ----> AKT1 26878778 10.1016/j.jnutbio.2015.09.015  
 Regulation: PPARG ----> AKT1 16204373  
 Regulation: PPARG ----> AKT1 15199412  
 Regulation: PPARG ----> AKT1 19246449  
 Regulation: PPARG ----> AKT1 17337625  
 Regulation: PPARG ----> AKT1 17337625  
 Regulation: PPARG ----> AKT1 12048207  
 Regulation: PPARG ----> AKT1 16051889  
 Regulation: PPARG ----> AKT1 16051889  
 Regulation: PPARG ----> AKT1 15677515  
 Regulation: PPARG ----> AKT1 12411472  
 Regulation: PPARG ----> AKT1 12411472  
 Regulation: PPARG ----> AKT1 27356604 10.2220/biomedres.37.167  
 Regulation: PPARG ----> AKT1 26885270  
 Regulation: PPARG ----> AKT1 26885270  
 Regulation: PPARG ----> AKT1 26885270  
 Regulation: PPARG ----> AKT1 28177764 10.1139/bcb-2016-0110  
 Regulation: PPARG ----> AKT1 28673319 10.1186/s13046-017-0557-6  
 Regulation: PPARG ----> AKT1 28466688 10.1177/1074248417707049  
 Regulation: PPARG ----> AKT1 29457786 10.1172/JCI97702  
 Regulation: PPARG ----> AKT1 29686697 10.1155/2018/6970407  
 Regulation: PPARG ----> AKT1 29568880 10.3892/ijmm.2018.3568  
 Regulation: PPARG ----> AKT1 30087458 10.1038/s41374-018-0098-4  
 Regulation: PPARG ----> AKT1 30845932 10.1186/s12885-019-5426-6  
 Regulation: PPARG ----> AKT1 31173165 10.3892/ijmm.2019.4210  
 Regulation: PPARG ----> AKT1 30758990 10.1152/ajplung.00403.2018  
 Regulation: PPARG ----> AKT1 31404995 10.3390/ijms20163891  
 Regulation: PPARG ----> AKT1 31814555 10.2174/1568009619666191209102015  
 Regulation: PPARG ----> AKT1 32929062 10.1038/s41419-020-02969-x  
 Regulation: PPARG ----> AKT1 32710395 10.1007/s43440-020-00140-z  
 Regulation: PPARG ----> AKT1 32279581 10.1161/CIRCRESAHA.119.315558  
 Regulation: PPARG ----> AKT1 22190906 10.1155/2011/29165610.1155/2011/291656  
 Regulation: PPARG ----> AKT1 23766271 10.1002/stem.145510.1002/stem.1455  
 Regulation: PPARG ----> AKT1 145 10.1016/j.yexcr.2017.10.024  
 Regulation: PPARG ----> AKT1 276 10.1016/j.npep.2018.04.002  
 Regulation: PPARG ----> AKT1 10.1016/j.bbrc.2004.08.101  
 Regulation: PPARG ----> AKT1 10.1016/j.mehy.2006.12.064  
 Regulation: PPARG ----> AKT1 10.1016/j.jnutbio.2015.09.015  
 Regulation: PPARG ----> AKT1 10.1172/JCI97702  
 Regulation: PPARG ----> AKT1 10.3892/ijmm.2019.4210  
 Regulation: PPARG ----> AKT1 10.1152/ajplung.00403.2018  
 Regulation: PPARG ----> AKT1 10.3390/ijms20163891  
 Regulation: PPARG ----> AKT1 10.2174/1568009619666191209102015  
 Regulation: PPARG ----> AKT1 22502865 10.1186/1755-1536-5-5

Regulation: PPARG ----> AKT1 22502865 10.1186/1755-1536-5-5  
 Regulation: PPARG ----> AKT1 22502865 10.1186/1755-1536-5-5  
 Regulation: PPARG ----> AKT1 22474127 10.1210/me.2011-1253  
 Regulation: PPARG ----> AKT1 22474127 10.1210/me.2011-1253  
 Regulation: PPARG ----> AKT1 22934112 10.1155/2012/408131  
 Regulation: PPARG ----> AKT1 20862376 10.1155/2010/417646  
 Regulation: PPARG ----> AKT1 21471100 10.1164/rccm.201010-15850C  
 Regulation: PPARG ----> AKT1 22190906 10.1155/2011/291656  
 Regulation: PPARG ----> AKT1 22481913 10.1155/2012/641087  
 Regulation: PPARG ----> AKT1 22481913 10.1155/2012/641087  
 Regulation: PPARG ----> AKT1 20127524 10.1007/s12035-010-8103-y  
 Regulation: PPARG ----> AKT1 20505521 10.1097/FJC.0b013e3181e74d83  
 Regulation: PPARG ----> AKT1 22879581 10.1161/ATVBAHA.112.253823  
 Regulation: PPARG ----> AKT1 22874998 10.1038/cddis.2012.99  
 Regulation: PPARG ----> AKT1 24096869 10.1038/cdd.2013.129  
 Regulation: PPARG ----> AKT1 23372643 10.1371/journal.pone.0050128  
 Regulation: PPARG ----> AKT1 23650507 10.1371/journal.pone.0062012  
 Regulation: PPARG ----> AKT1 24890395 10.1007/s40265-014-0235-3  
 Regulation: PPARG ----> AKT1 25748432 10.1371/journal.pone.0118902  
 Regulation: PPARG ----> AKT1 10.4014/jmb.1501.01052  
 Regulation: PPARG ----> AKT1 30405422 10.3389/fphar.2018.0121110.3389/fphar.2018.01  
 Regulation: PPARG ----> AKT1 31267531 10.1002/jcp.2904010.1002/jcp.29040  
 Regulation: PPARG ----> AKT1 32612951 10.3389/fonc.2020.0091510.3389/fonc.2020.0091  
 Regulation: PPARG ----> AKT1 26299428 10.3892/mmr.2015.4224  
 Regulation: PPARG ----> AKT1 27150726 10.3892/mmr.2016.5208  
 Regulation: PPARG ----> AKT1 24856644 10.1016/j.thromres.2014.05.005  
 Regulation: PPARG ----> AKT1 24703963 10.1016/j.peptides.2014.03.014  
 Regulation: PPARG ----> AKT1 22874998 10.1038/cddis.2012.99  
 Regulation: PPARG ----> AKT1 16051889 10.1161/01.RES.0000179226.34112.6d  
 Regulation: PPARG ----> AKT1 17577098 10.1097/FJC.0b013e31804654d7  
 Regulation: PPARG ----> AKT1 18300869 10.1097/HJH.0b013e3282f343e110.1097/HJH.0b013  
 Regulation: PPARG ----> AKT1 20212046 10.1074/jbc.M109.08771810.1074/jbc.M109.08771  
 Regulation: PPARG ----> AKT1 25748432 10.1371/journal.pone.0118902  
 Regulation: PPARG ----> AKT1 26643367 10.1038/srep17878  
 Regulation: PPARG ----> AKT1 16204373  
 Regulation: PPARG ----> AKT1 16204373  
 Regulation: PPARG ----> AKT1 29350308 10.1007/s10549-017-4649-y10.1007/s10549-017-4  
 Regulation: PPARG ----> AKT1 30454889 10.1016/j.bbrc.2018.11.04510.1016/j.bbrc.2018  
 Regulation: PPARG ----> AKT1 10.1161/CIRCRESAHA.119.315558  
 Regulation: PPARG ----> AKT1 10.1161/CIRCRESAHA.119.315558  
 Regulation: PPARG ----> AKT1 33199780 10.1038/s41467-020-19668-y  
 Regulation: PPARG ----> AKT1 33805942 10.3390/molecules26071844  
 Regulation: PPARG ----> AKT1 34373417 10.1507/endocrj.EJ21-0110  
 Regulation: PPARG ----> AKT1 35181582 10.21873/cgp.20308  
 Regulation: PPARG ----> AKT1 35397087 10.1007/s11033-022-07401-5

Expression: AKT1 ---> PPARG 28069607 10.1182/blood-2016-10-743757  
Expression: AKT1 ---> PPARG 31760068 10.1016/j.ejphar.2019.172822  
Expression: AKT1 ---> PPARG 26940012 10.1016/j.yexcr.2016.02.019  
Expression: AKT1 ---> PPARG 16407258 10.1074/jbc.M508799200  
Expression: AKT1 ---> PPARG 23592774 10.1074/jbc.M113.459792  
Expression: AKT1 ---> PPARG 15545269 10.1074/jbc.M410480200  
Expression: AKT1 ---> PPARG 30694771 10.1016/j.jss.2018.11.056  
Expression: AKT1 ---> PPARG 28887057 10.1016/j.lfs.2017.09.008  
Expression: AKT1 ---> PPARG 28887057 10.1016/j.lfs.2017.09.008  
Expression: AKT1 ---> PPARG 28887057 10.1016/j.lfs.2017.09.008  
Expression: AKT1 ---> PPARG 30107270 10.1016/j.biomaterials.2018.07.046  
Expression: AKT1 ---> PPARG 31585207 10.1016/j.freeradbiomed.2019.09.029  
Expression: AKT1 ---> PPARG 31132754 10.1016/j.phymed.2019.152952  
Expression: AKT1 ---> PPARG 26615875 10.1016/j.bbalip.2015.11.006  
Expression: AKT1 ---> PPARG 33541789 10.1016/j.orcp.2021.01.003  
Expression: AKT1 ---> PPARG 10.1016/j.coemr.2019.04.002  
Expression: AKT1 ---> PPARG 18423396 10.1016/j.bbrc.2008.04.029  
Expression: AKT1 ---> PPARG 19385085 10.1016/j.lfs.2009.01.018  
Expression: AKT1 ---> PPARG 19385085 10.1016/j.lfs.2009.01.018  
Expression: AKT1 ---> PPARG 21315734 10.1016/j.lfs.2011.02.001  
Expression: AKT1 ---> PPARG 10.1016/S0083-6729(03)01005-7  
Expression: AKT1 ---> PPARG 21333731 10.1016/j.tiv.2011.02.004  
Expression: AKT1 ---> PPARG 21840191 10.1016/j.jnutbio.2011.03.021  
Expression: AKT1 ---> PPARG 21840191 10.1016/j.jnutbio.2011.03.021  
Expression: AKT1 ---> PPARG 22497928 10.1016/j.biocel.2012.03.019  
Expression: AKT1 ---> PPARG 22497928 10.1016/j.biocel.2012.03.019  
Expression: AKT1 ---> PPARG 19782949 10.1016/j.biocel.2009.04.004  
Expression: AKT1 ---> PPARG 25283330 10.1016/j.jnutbio.2014.07.007  
Expression: AKT1 ---> PPARG 27117918 10.1016/j.fct.2016.04.017  
Expression: AKT1 ---> PPARG 17540722  
Expression: AKT1 ---> PPARG 17312274  
Expression: AKT1 ---> PPARG 17312274  
Expression: AKT1 ---> PPARG 19221061  
Expression: AKT1 ---> PPARG 16407258  
Expression: AKT1 ---> PPARG 15545269  
Expression: AKT1 ---> PPARG 16478789  
Expression: AKT1 ---> PPARG 11717164  
Expression: AKT1 ---> PPARG 18388859  
Expression: AKT1 ---> PPARG 28840539 10.1007/s12272-017-0948-4  
Expression: AKT1 ---> PPARG 29283422 10.3390/ijms19010090  
Expression: AKT1 ---> PPARG 29283422 10.3390/ijms19010090  
Expression: AKT1 ---> PPARG 29899319 10.3390/ijms19061760  
Expression: AKT1 ---> PPARG 29533735 10.1096/fj.201700208RR

Expression: AKT1 ---> PPARG 30250490 10.1155/2018/4573254  
 Expression: AKT1 ---> PPARG 30176712 10.4014/jmb.1802.01065  
 Expression: AKT1 ---> PPARG 30176712 10.4014/jmb.1802.01065  
 Expression: AKT1 ---> PPARG 30647194 10.21775/cimb.031.001  
 Expression: AKT1 ---> PPARG 30647194 10.21775/cimb.031.001  
 Expression: AKT1 ---> PPARG 30647194 10.21775/cimb.031.001  
 Expression: AKT1 ---> PPARG 31295749 10.1055/a-0926-3991  
 Expression: AKT1 ---> PPARG 33199780 10.1038/s41467-020-19668-y  
 Expression: AKT1 ---> PPARG 32976570 10.1210/endocr/bqaa175  
 Expression: AKT1 ---> PPARG 33712900 10.1007/s00431-021-03977-5  
 Expression: AKT1 ---> PPARG 21673026 10.1530/JOE-11-0175  
 Expression: AKT1 ---> PPARG 23592774 10.1074/jbc.M113.459792  
 Expression: AKT1 ---> PPARG 23746272 10.2174/09298673113209990136  
 Expression: AKT1 ---> PPARG 23166699 10.1371/journal.pone.0049530  
 Expression: AKT1 ---> PPARG 23936120 10.1371/journal.pone.0069925  
 Expression: AKT1 ---> PPARG 23396401 10.2337/db12-1229  
 Expression: AKT1 ---> PPARG 26295369 10.1210/en.2015-1184  
 Expression: AKT1 ---> PPARG 26295369 10.1210/en.2015-1184  
 Expression: AKT1 ---> PPARG 19191008 10.1007/s11010-009-0027-310.1007/s11010-009-0  
 Expression: AKT1 ---> PPARG 19191008 10.1007/s11010-009-0027-310.1007/s11010-009-0  
 Expression: AKT1 ---> PPARG 26615875 10.1016/j.bbalip.2015.11.00610.1016/j.bbalip.  
 Expression: AKT1 ---> PPARG 27940057 10.1016/j.ejphar.2016.12.00610.1016/j.ejphar.  
 Expression: AKT1 ---> PPARG 33152931 10.1016/j.biopha.2020.11076910.1016/j.biopha.  
 Expression: AKT1 ---> PPARG 34833928 10.3390/molecules26226836  
 Expression: AKT1 ---> PPARG 35807476 10.3390/molecules27134232  
 Regulation: SFRP1 ---> MAPK1 20595636 10.2353/ajpath.2010.090803  
 Regulation: SFRP1 ---> MAPK1 23266471 10.1016/j.cellsig.2012.12.006  
 Regulation: SFRP1 ---> MAPK1 20595636 10.2353/ajpath.2010.09080310.2353/ajpath.2010  
 negative Expression: BIRC7 ---| F32064154  
 positive PromoterBinding: PPARG -24026200 10.3892/ijmm.2013.1487  
 positive PromoterBinding: PPARG -31634455 10.1016/j.bcp.2019.113674  
 positive PromoterBinding: PPARG -19684609 10.1038/aps.2009.119  
 positive PromoterBinding: PPARG -16425225 10.1002/ijc.21799  
 positive PromoterBinding: PPARG -22615735 10.1371/journal.pone.0035283  
 positive PromoterBinding: PPARG -24905788 10.1146/annurev-biochem-082411-113907  
 positive PromoterBinding: PPARG -21955520 10.1158/1940-6207.CAPR-11-0256  
 positive PromoterBinding: PPARG -22902055 10.1016/j.biopha.2012.04.004  
 positive PromoterBinding: PPARG -24098526 10.1371/journal.pone.0076541  
 positive PromoterBinding: PPARG -21990315 10.1210/en.2011-1207  
 positive PromoterBinding: PPARG -21471100 10.1164/rccm.201010-15850C  
 positive PromoterBinding: PPARG -21267808 10.1055/s-0030-1250735  
 positive PromoterBinding: PPARG -1355 10.1007/bf02082676  
 positive PromoterBinding: PPARG -21700710 10.1074/jbc.M111.273292  
 positive PromoterBinding: PPARG -18032782 10.1242/jcs.015230  
 positive PromoterBinding: PPARG -100041034 10.1016/S0006-2952(03)00488-X  
 positive PromoterBinding: PPARG -28330809 10.1016/j.ebiom.2017.03.021  
 positive PromoterBinding: PPARG -100041034 10.1016/S0006-2952(03)00488-X  
 positive PromoterBinding: PPARG -22902055 10.1016/j.biopha.2012.04.004  
 positive PromoterBinding: PPARG -18032782 10.1242/jcs.015230  
 positive PromoterBinding: PPARG -33194023  
 positive PromoterBinding: PPARG -32807067 10.2174/1871520620666200817101533

positive PromoterBinding: PPARG -21990315 10.1210/en.2011-1207  
 positive PromoterBinding: PPARG -23867870 10.1097/MIB.0b013e318297d74110.1097/MIB.0b013  
 positive PromoterBinding: PPARG -1355 10.1016/j.ebiom.2017.03.021  
 positive PromoterBinding: PPARG ---> PTEN  
 positive PromoterBinding: PPARG -21267808 10.1055/s-0030-1250735  
 positive PromoterBinding: PPARG -21955520 10.1158/1940-6207.CAPR-11-0256  
 positive PromoterBinding: PPARG -21700710 10.1074/jbc.M111.273292  
 positive PromoterBinding: PPARG -21471100 10.1164/rccm.201010-15850C  
 positive PromoterBinding: PPARG -24905788 10.1146/annurev-biochem-082411-113907  
 positive PromoterBinding: PPARG -24098526 10.1371/journal.pone.0076541  
 positive PromoterBinding: PPARG -24026200 10.3892/ijmm.2013.1487  
 positive PromoterBinding: PPARG -19684609 10.1038/aps.2009.119  
 positive PromoterBinding: PPARG -16425225 10.1002/ijc.21799  
 positive PromoterBinding: PPARG -22615735 10.1371/journal.pone.0035283  
 positive PromoterBinding: PPARG ---> PTEN  
 positive PromoterBinding: PPARG -21625550 10.1371/journal.pone.0019652  
 positive PromoterBinding: PPARG ---> PTEN  
 positive PromoterBinding: PPARG -20198337  
 positive PromoterBinding: PPARG ---> PTEN  
 positive PromoterBinding: PPARG -24026200 10.3892/ijmm.2013.1487  
 positive PromoterBinding: PPARG -24026200 10.3892/ijmm.2013.1487  
 positive PromoterBinding: PPARG -22615735 10.1371/journal.pone.0035283  
 negative Expression: UCA1 ---| P132414649 10.1016/j.clbc.2019.11.001  
 negative Expression: UCA1 ---| P129061150 10.1186/s12943-017-0734-4  
 negative Expression: UCA1 ---| P129328452 10.3892/or.2018.6182  
 negative Expression: UCA1 ---| P129328452 10.3892/or.2018.6182  
 negative Expression: UCA1 ---| P129328452 10.3892/or.2018.6182  
 negative Expression: UCA1 ---| P132916254 10.1016/j.phrs.2020.105195  
 negative Expression: UCA1 ---| P129908280 10.1016/j.gene.2018.06.031  
 negative Expression: UCA1 ---| P129908280 10.1016/j.gene.2018.06.031  
 negative Expression: UCA1 ---| P129908280 10.1016/j.gene.2018.06.031  
 negative Expression: UCA1 ---| P129408336 10.1016/j.bbrc.2018.02.006  
 negative Regulation: PTEN ---| UC34051619 10.1016/j.tranon.2021.101134  
 negative Regulation: PTEN ---| UC26513297 10.18632/oncotarget.580510.18632/oncotarget.5  
 Expression: NGF ---> NOTCH1 21861782 10.1515/RNS.2011.041  
 Expression: NGF ---> NOTCH1 26491050 10.1152/ajpcell.00163.2015  
 Expression: NOTCH1 ---> PPARG 12960086  
 Expression: NOTCH1 ---> PPARG 12960086  
 Expression: NOTCH1 ---> PPARG 12960086  
 Expression: NOTCH1 ---> PPARG 9368042  
 Expression: NOTCH1 ---> PPARG 12107827  
 Expression: NOTCH1 ---> PPARG 29115530 10.3892/mmr.2017.7980  
 Expression: NOTCH1 ---> PPARG 33021719 10.1007/s11033-020-05884-8  
 Expression: NOTCH1 ---> PPARG 33021719 10.1007/s11033-020-05884-8  
 Expression: NOTCH1 ---> PPARG 24696378 10.1007/s10495-014-0985-0  
 Expression: NOTCH1 ---> PPARG 25704852 10.1016/j.intimp.2015.02.019  
 Expression: NOTCH1 ---> PPARG 23070070 10.1007/s00395-012-0306-01  
 Expression: NOTCH1 ---> PPARG 22854710 10.1159/000341451

Expression: NOTCH1 ---> PPARG 26438692 10.1242/dmm.021055  
 Expression: NOTCH1 ---> PPARG 22056382 10.1172/JCI45797  
 Expression: NOTCH1 ---> PPARG 23046039 10.1111/j.1365-2184.2012.00850.x  
 Expression: NOTCH1 ---> PPARG 10.2174/1381612822666161006160524  
 positive Regulation: SFRP1 --> F18156211 10.2353/ajpath.2008.070130  
 positive Regulation: SFRP1 --> F18156211 10.2353/ajpath.2008.070130  
 positive Regulation: SFRP1 --> F30542739 10.3892/or.2018.6838  
 positive Regulation: SFRP1 --> F22076635 10.1161/CIRCRESAHA.111.250936  
 positive Regulation: SFRP1 --> RAC1  
 Expression: CLDN1 ---> SPP1 31952355 10.3390/ijms21020569  
 Expression: CLDN1 ---> SPP1 26982264 10.1089/dna.2015.3188  
 positive Expression: BECN1 --> F30700382 10.1016/j.bbrc.2019.01.091  
 positive Expression: BECN1 --> F32713934 10.12659/MSM.922032  
 negative Regulation: CD34 ---| MC27032651 10.1007/s10495-016-1238-1  
 negative Regulation: CD34 ---| MC27032651 10.1007/s10495-016-1238-1  
 Expression: AKT1 ---> PTGS2 23911786 10.1016/j.bbrc.2013.07.110  
 Expression: AKT1 ---> PTGS2 23911786 10.1016/j.bbrc.2013.07.110  
 Expression: AKT1 ---> PTGS2 24583133 10.1016/j.bbrc.2014.02.085  
 Expression: AKT1 ---> PTGS2 27286705 10.1016/j.bbrc.2016.05.070  
 Expression: AKT1 ---> PTGS2 31629465 10.1016/j.bbrc.2019.10.092  
 Expression: AKT1 ---> PTGS2 30391477 10.1016/j.bcp.2018.10.034  
 Expression: AKT1 ---> PTGS2 28438649 10.1016/j.ejphar.2017.04.027  
 Expression: AKT1 ---> PTGS2 12372818 10.1074/jbc.M210106200  
 Expression: AKT1 ---> PTGS2 26518876 10.1074/jbc.M115.668277  
 Expression: AKT1 ---> PTGS2 26518876 10.1074/jbc.M115.668277  
 Expression: AKT1 ---> PTGS2 18326857 10.1074/jbc.M703811200  
 Expression: AKT1 ---> PTGS2 16982614 10.1074/jbc.M605368200  
 Expression: AKT1 ---> PTGS2 12072439 10.1074/jbc.M203218200  
 Expression: AKT1 ---> PTGS2 12960176 10.1074/jbc.M303789200  
 Expression: AKT1 ---> PTGS2 12865424 10.1074/jbc.M305213200  
 Expression: AKT1 ---> PTGS2 12865424 10.1074/jbc.M305213200  
 Expression: AKT1 ---> PTGS2 10930401 10.1074/jbc.M002324200  
 Expression: AKT1 ---> PTGS2 25371970 10.1038/jid.2014.477  
 Expression: AKT1 ---> PTGS2 23873269 10.1194/jlr.R037762  
 Expression: AKT1 ---> PTGS2 26898122 10.1016/j.lfs.2016.02.060  
 Expression: AKT1 ---> PTGS2 30726711 10.1016/j.lfs.2019.02.007  
 Expression: AKT1 ---> PTGS2 28407559 10.1016/j.molimm.2017.04.004  
 Expression: AKT1 ---> PTGS2 20298753 10.1016/j.neulet.2010.03.026  
 Expression: AKT1 ---> PTGS2 27015762 10.1016/j.bbagen.2016.03.030  
 Expression: AKT1 ---> PTGS2 31866556 10.1016/j.neuroscience.2019.12.005  
 Expression: AKT1 ---> PTGS2 32535239 10.1016/j.jep.2020.113052  
 Expression: AKT1 ---> PTGS2 32512147 10.1016/j.tiv.2020.104912  
 Expression: AKT1 ---> PTGS2 32512147 10.1016/j.tiv.2020.104912  
 Expression: AKT1 ---> PTGS2 30683268 10.1016/j.ogc.2018.09.006  
 Expression: AKT1 ---> PTGS2 27823627 10.1016/j.phymed.2016.10.007  
 Expression: AKT1 ---> PTGS2 26241029 10.1016/j.jsbmb.2015.07.019  
 Expression: AKT1 ---> PTGS2 27590705 10.1016/j.bmc1.2016.08.074  
 Expression: AKT1 ---> PTGS2 29031211 10.1016/j.jphotobiol.2017.10.006  
 Expression: AKT1 ---> PTGS2 29031211 10.1016/j.jphotobiol.2017.10.006

Expression: AKT1 ---> PTGS2 29031211 10.1016/j.jphotobiol.2017.10.006  
Expression: AKT1 ---> PTGS2 31911246 10.1016/j.phrs.2020.104632  
Expression: AKT1 ---> PTGS2 26485540 10.1016/j.jmgm.2015.10.004  
Expression: AKT1 ---> PTGS2 28389370 10.1016/j.prostaglandins.2017.04.001  
Expression: AKT1 ---> PTGS2 28495310 10.1016/j.biocel.2017.05.015  
Expression: AKT1 ---> PTGS2 28495310 10.1016/j.biocel.2017.05.015  
Expression: AKT1 ---> PTGS2 28495310 10.1016/j.biocel.2017.05.015  
Expression: AKT1 ---> PTGS2 30529656 10.1016/j.biocel.2018.12.001  
Expression: AKT1 ---> PTGS2 28219839 10.1016/j.intimp.2017.01.032  
Expression: AKT1 ---> PTGS2 29310107 10.1016/j.intimp.2018.01.001  
Expression: AKT1 ---> PTGS2 20167866 10.2353/ajpath.2010.090714  
Expression: AKT1 ---> PTGS2 17825254 10.1016/j.bbrc.2007.08.119  
Expression: AKT1 ---> PTGS2 17067555 10.1016/j.bcp.2006.09.018  
Expression: AKT1 ---> PTGS2 17067555 10.1016/j.bcp.2006.09.018  
Expression: AKT1 ---> PTGS2 18606397 10.1016/j.bcp.2008.05.023  
Expression: AKT1 ---> PTGS2 19426678 10.1016/j.bcp.2009.01.009  
Expression: AKT1 ---> PTGS2 21669192 10.1016/j.bcp.2011.05.027  
Expression: AKT1 ---> PTGS2 17481595 10.1016/j.brainres.2007.03.006  
Expression: AKT1 ---> PTGS2 16005454 10.1016/j.ydbio.2005.05.033  
Expression: AKT1 ---> PTGS2 17208222 10.1016/j.ejphar.2006.11.060  
Expression: AKT1 ---> PTGS2 17070520 10.1016/j.yexcr.2006.09.019  
Expression: AKT1 ---> PTGS2 18395088 10.1053/j.gastro.2008.01.040  
Expression: AKT1 ---> PTGS2 18395088 10.1053/j.gastro.2008.01.040  
Expression: AKT1 ---> PTGS2 19302827 10.1016/j.yjmcc.2009.01.006  
Expression: AKT1 ---> PTGS2 15854673 10.1016/j.jss.2004.12.022  
Expression: AKT1 ---> PTGS2 17198778 10.1016/j.jtevs.2006.07.042  
Expression: AKT1 ---> PTGS2 15748645 10.1016/j.mrfmmm.2004.07.019  
Expression: AKT1 ---> PTGS2 17889918 10.1016/j.taap.2007.08.012  
Expression: AKT1 ---> PTGS2 18597804 10.1016/j.taap.2008.05.017  
Expression: AKT1 ---> PTGS2 18840457 10.1016/j.taap.2008.09.003  
Expression: AKT1 ---> PTGS2 17223196 10.1016/j.molimm.2006.12.003  
Expression: AKT1 ---> PTGS2 19118901 10.1016/j.molimm.2008.11.006  
Expression: AKT1 ---> PTGS2 19118901 10.1016/j.molimm.2008.11.006  
Expression: AKT1 ---> PTGS2 22154837 10.1016/j.molimm.2011.11.011  
Expression: AKT1 ---> PTGS2 19815299 10.1016/j.jneuroim.2009.09.004  
Expression: AKT1 ---> PTGS2 19815299 10.1016/j.jneuroim.2009.09.004  
Expression: AKT1 ---> PTGS2 17084486 10.1016/j.neuint.2006.09.016  
Expression: AKT1 ---> PTGS2 22542552 10.1016/j.fct.2012.04.024  
Expression: AKT1 ---> PTGS2 22542552 10.1016/j.fct.2012.04.024  
Expression: AKT1 ---> PTGS2 22542552 10.1016/j.fct.2012.04.024  
Expression: AKT1 ---> PTGS2 22353212 10.1016/j.fct.2012.02.006  
Expression: AKT1 ---> PTGS2 19339108 10.1016/j.canlet.2009.03.003  
Expression: AKT1 ---> PTGS2 21924548 10.1016/j.canlet.2011.08.001  
Expression: AKT1 ---> PTGS2 15921858 10.1016/j.bbcan.2005.04.002  
Expression: AKT1 ---> PTGS2 22001128 10.1016/j.mehy.2011.09.039



Expression: AKT1 ---> PTGS2 18571350 10.1016/j.jep.2008.05.001  
 Expression: AKT1 ---> PTGS2 34547381 10.1016/j.jsbmb.2021.10600110.1016/j.jsbmb.20  
 Expression: AKT1 ---> PTGS2 18597804 10.1016/j.taap.2008.05.01710.1016/j.taap.2008  
 Expression: AKT1 ---> PTGS2 21533119 10.1371/journal.pone.001882310.1371/journal.p  
 Expression: AKT1 ---> PTGS2 21745389 10.1186/1471-2199-12-2910.1186/1471-2199-12-2  
 Expression: AKT1 ---> PTGS2 21745389 10.1186/1471-2199-12-2910.1186/1471-2199-12-2  
 Expression: AKT1 ---> PTGS2 22214188 10.1186/1742-2094-9-210.1186/1742-2094-9-2  
 Expression: AKT1 ---> PTGS2 22214188 10.1186/1742-2094-9-210.1186/1742-2094-9-2  
 Expression: AKT1 ---> PTGS2 23263903 10.1007/s11010-012-1539-910.1007/s11010-012-1  
 Expression: AKT1 ---> PTGS2 23263903 10.1007/s11010-012-1539-910.1007/s11010-012-1  
 Expression: AKT1 ---> PTGS2 24520260 10.3892/etm.2014.1484  
 Expression: AKT1 ---> PTGS2 757 10.1016/j.bmc1.2016.08.074  
 Expression: AKT1 ---> PTGS2 32655777  
 Expression: AKT1 ---> PTGS2 10.1016/j.bbrc.2019.10.092  
 Expression: AKT1 ---> PTGS2 17223196 10.1016/j.molimm.2006.12.003  
 Expression: AKT1 ---> PTGS2 10.1016/j.molimm.2011.11.011  
 Expression: AKT1 ---> PTGS2 10.1016/j.fct.2012.02.006  
 Expression: AKT1 ---> PTGS2 10.1016/j.biopha.2003.09.009  
 Expression: AKT1 ---> PTGS2 20152896 10.1016/j.tiv.2010.02.008  
 Expression: AKT1 ---> PTGS2 20036733 10.1016/j.freeradbiomed.2009.12.014  
 Expression: AKT1 ---> PTGS2 20036733 10.1016/j.freeradbiomed.2009.12.014  
 Expression: AKT1 ---> PTGS2 10.1016/j.cellsig.2004.10.001  
 Expression: AKT1 ---> PTGS2 15894170 10.1016/j.cellsig.2004.11.015  
 Expression: AKT1 ---> PTGS2 17341442 10.1016/j.cellsig.2007.01.028  
 Expression: AKT1 ---> PTGS2 17692505 10.1016/j.cellsig.2007.07.006  
 Expression: AKT1 ---> PTGS2 19007880 10.1016/j.cellsig.2008.10.014  
 Expression: AKT1 ---> PTGS2 20206688 10.1016/j.cellsig.2010.02.010  
 Expression: AKT1 ---> PTGS2 19914807 10.1016/j.jdermsci.2009.10.005  
 Expression: AKT1 ---> PTGS2 18656337 10.1016/j.jnutbio.2008.02.004  
 Expression: AKT1 ---> PTGS2 22071130 10.1016/j.ejca.2011.09.026  
 Expression: AKT1 ---> PTGS2 16531064 10.1016/j.critrevonc.2006.01.003  
 Expression: AKT1 ---> PTGS2 20883815 10.1016/j.biocel.2010.09.011  
 Expression: AKT1 ---> PTGS2 20883815 10.1016/j.biocel.2010.09.011  
 Expression: AKT1 ---> PTGS2 11597520 10.1016/S1471-4914(01)02107-4  
 Expression: AKT1 ---> PTGS2 11597520 10.1016/S1471-4914(01)02107-4  
 Expression: AKT1 ---> PTGS2 19298870 10.1016/j.intimp.2009.03.005  
 Expression: AKT1 ---> PTGS2 20451669 10.1016/j.intimp.2010.04.026  
 Expression: AKT1 ---> PTGS2 20451669 10.1016/j.intimp.2010.04.026  
 Expression: AKT1 ---> PTGS2 20840837 10.1016/j.intimp.2010.08.026  
 Expression: AKT1 ---> PTGS2 20937401 10.1016/j.intimp.2010.09.011  
 Expression: AKT1 ---> PTGS2 10.1016/j.intimp.2011.02.008  
 Expression: AKT1 ---> PTGS2 10.1016/j.intimp.2011.02.008  
 Expression: AKT1 ---> PTGS2 10.1016/j.intimp.2011.02.008  
 Expression: AKT1 ---> PTGS2 22974512 10.1016/j.ygcen.2012.08.020  
 Expression: AKT1 ---> PTGS2 23017720 10.1016/B978-0-12-398313-8.00011-7  
 Expression: AKT1 ---> PTGS2 22561121 10.1016/j.intimp.2012.04.013  
 Expression: AKT1 ---> PTGS2 22940184 10.1016/j.intimp.2012.08.011  
 Expression: AKT1 ---> PTGS2 23376120 10.1016/j.bcp.2013.01.020

Expression: AKT1 ---> PTGS2 23376120 10.1016/j.bcp.2013.01.020  
Expression: AKT1 ---> PTGS2 23429041 10.1016/j.fct.2013.02.017  
Expression: AKT1 ---> PTGS2 23429041 10.1016/j.fct.2013.02.017  
Expression: AKT1 ---> PTGS2 23429041 10.1016/j.fct.2013.02.017  
Expression: AKT1 ---> PTGS2 23376640 10.1016/j.canlet.2012.12.030  
Expression: AKT1 ---> PTGS2 32904445 10.2147/OTT.S26397710.2147/OTT.S263977  
Expression: AKT1 ---> PTGS2 32904445 10.2147/OTT.S26397710.2147/OTT.S263977  
Expression: AKT1 ---> PTGS2 32904445 10.2147/OTT.S26397710.2147/OTT.S263977  
Expression: AKT1 ---> PTGS2 15980035 10.1152/ajplung.00197.2005  
Expression: AKT1 ---> PTGS2 15980035 10.1152/ajplung.00197.2005  
Expression: AKT1 ---> PTGS2 15980035 10.1152/ajplung.00197.2005  
Expression: AKT1 ---> PTGS2 19717552 10.1152/ajplung.00151.200910.1152/ajplung.001  
Expression: AKT1 ---> PTGS2 22773695 10.1152/ajplung.00090.201210.1152/ajplung.000  
Expression: AKT1 ---> PTGS2 27795708 10.1155/2016/5616807  
Expression: AKT1 ---> PTGS2 10.1691/ph.2019.9373  
Expression: AKT1 ---> PTGS2 10.1124/jpet.119.257501  
Expression: AKT1 ---> PTGS2 10.1124/jpet.119.257501  
Expression: AKT1 ---> PTGS2 10.1124/jpet.119.257501  
Expression: AKT1 ---> PTGS2 10.1248/bpb.b19-00222  
Expression: AKT1 ---> PTGS2 31300611 10.1124/jpet.119.25750110.1124/jpet.119.25750  
Expression: AKT1 ---> PTGS2 31300611 10.1124/jpet.119.25750110.1124/jpet.119.25750  
Expression: AKT1 ---> PTGS2 15894170 10.1016/j.cellsig.2004.11.015  
Expression: AKT1 ---> PTGS2 20883815 10.1016/j.biocel.2010.09.011  
Expression: AKT1 ---> PTGS2 23500011 10.1016/j.taap.2013.03.004  
Expression: AKT1 ---> PTGS2 17223196 10.1016/j.molimm.2006.12.003  
Expression: AKT1 ---> PTGS2 17223196 10.1016/j.molimm.2006.12.003  
Expression: AKT1 ---> PTGS2 18771702 10.1016/j.mce.2008.08.004  
Expression: AKT1 ---> PTGS2 15964692 10.1016/j.bbcan.2005.04.001  
Expression: AKT1 ---> PTGS2 17644291 10.1016/j.jep.2007.05.023  
Expression: AKT1 ---> PTGS2 15894170 10.1016/j.cellsig.2004.11.015  
Expression: AKT1 ---> PTGS2 19914807 10.1016/j.jdermsci.2009.10.005  
Expression: AKT1 ---> PTGS2 23872401 10.1016/j.ejphar.2013.07.010  
Expression: AKT1 ---> PTGS2 24016823 10.1016/j.yexcr.2013.08.026  
Expression: AKT1 ---> PTGS2 24239652 10.1016/j.taap.2013.11.002  
Expression: AKT1 ---> PTGS2 23968725 10.1016/j.toxlet.2013.08.008  
Expression: AKT1 ---> PTGS2 23968725 10.1016/j.toxlet.2013.08.008  
Expression: AKT1 ---> PTGS2 24467851 10.1016/j.neuropharm.2014.01.022  
Expression: AKT1 ---> PTGS2 24296130 10.1016/j.fct.2013.11.035  
Expression: AKT1 ---> PTGS2 24365262 10.1016/j.fct.2013.12.011  
Expression: AKT1 ---> PTGS2 24612689 10.1016/j.biopha.2014.01.006  
Expression: AKT1 ---> PTGS2 24747121 10.1016/j.canlet.2014.03.037  
Expression: AKT1 ---> PTGS2 24747121 10.1016/j.canlet.2014.03.037  
Expression: AKT1 ---> PTGS2 24910117 10.1016/j.gene.2014.06.006  
Expression: AKT1 ---> PTGS2 24910117 10.1016/j.gene.2014.06.006  
Expression: AKT1 ---> PTGS2 10.1016/j.jep.2014.10.046  
Expression: AKT1 ---> PTGS2 25869400 10.1016/j.mce.2015.04.005  
Expression: AKT1 ---> PTGS2 25869400 10.1016/j.mce.2015.04.005  
Expression: AKT1 ---> PTGS2 25869400 10.1016/j.mce.2015.04.005  
Expression: AKT1 ---> PTGS2 25446583 10.1016/j.jep.2014.10.046  
Expression: AKT1 ---> PTGS2 25917838 10.1016/j.jep.2015.04.022

|                             |          |                           |
|-----------------------------|----------|---------------------------|
| Expression: AKT1 ---> PTGS2 | 25917838 | 10.1016/j.jep.2015.04.022 |
| Expression: AKT1 ---> PTGS2 | 25743463 | 10.1016/j.bpg.2014.12.003 |
| Expression: AKT1 ---> PTGS2 | 20124728 |                           |
| Expression: AKT1 ---> PTGS2 | 16998585 |                           |
| Expression: AKT1 ---> PTGS2 | 16945991 |                           |
| Expression: AKT1 ---> PTGS2 | 16740977 |                           |
| Expression: AKT1 ---> PTGS2 | 11733561 |                           |
| Expression: AKT1 ---> PTGS2 | 19933775 |                           |
| Expression: AKT1 ---> PTGS2 | 19933775 |                           |
| Expression: AKT1 ---> PTGS2 | 19933775 |                           |
| Expression: AKT1 ---> PTGS2 | 19933775 |                           |
| Expression: AKT1 ---> PTGS2 | 19933775 |                           |
| Expression: AKT1 ---> PTGS2 | 18326857 |                           |
| Expression: AKT1 ---> PTGS2 | 18326857 |                           |
| Expression: AKT1 ---> PTGS2 | 18326857 |                           |
| Expression: AKT1 ---> PTGS2 | 16982614 |                           |
| Expression: AKT1 ---> PTGS2 | 16540596 |                           |
| Expression: AKT1 ---> PTGS2 | 16540596 |                           |
| Expression: AKT1 ---> PTGS2 | 16540596 |                           |
| Expression: AKT1 ---> PTGS2 | 15322248 |                           |
| Expression: AKT1 ---> PTGS2 | 15322248 |                           |
| Expression: AKT1 ---> PTGS2 | 15322248 |                           |
| Expression: AKT1 ---> PTGS2 | 15322248 |                           |
| Expression: AKT1 ---> PTGS2 | 15322248 |                           |
| Expression: AKT1 ---> PTGS2 | 15322248 |                           |
| Expression: AKT1 ---> PTGS2 | 15322248 |                           |
| Expression: AKT1 ---> PTGS2 | 15322248 |                           |
| Expression: AKT1 ---> PTGS2 | 15322248 |                           |
| Expression: AKT1 ---> PTGS2 | 15322248 |                           |
| Expression: AKT1 ---> PTGS2 | 15322248 |                           |
| Expression: AKT1 ---> PTGS2 | 15117884 |                           |
| Expression: AKT1 ---> PTGS2 | 15016316 |                           |
| Expression: AKT1 ---> PTGS2 | 15016316 |                           |
| Expression: AKT1 ---> PTGS2 | 15016316 |                           |
| Expression: AKT1 ---> PTGS2 | 15016316 |                           |
| Expression: AKT1 ---> PTGS2 | 15016316 |                           |
| Expression: AKT1 ---> PTGS2 | 15016316 |                           |
| Expression: AKT1 ---> PTGS2 | 15016316 |                           |
| Expression: AKT1 ---> PTGS2 | 15016316 |                           |
| Expression: AKT1 ---> PTGS2 | 12960176 |                           |
| Expression: AKT1 ---> PTGS2 | 12865424 |                           |
| Expression: AKT1 ---> PTGS2 | 12865424 |                           |
| Expression: AKT1 ---> PTGS2 | 12865424 |                           |
| Expression: AKT1 ---> PTGS2 | 12865424 |                           |
| Expression: AKT1 ---> PTGS2 | 12372818 |                           |
| Expression: AKT1 ---> PTGS2 | 12072439 |                           |
| Expression: AKT1 ---> PTGS2 | 10930401 |                           |
| Expression: AKT1 ---> PTGS2 | 10930401 |                           |
| Expression: AKT1 ---> PTGS2 | 10930401 |                           |
| Expression: AKT1 ---> PTGS2 | 10930401 |                           |
| Expression: AKT1 ---> PTGS2 | 10930401 |                           |
| Expression: AKT1 ---> PTGS2 | 19218449 |                           |
| Expression: AKT1 ---> PTGS2 | 17680773 |                           |
| Expression: AKT1 ---> PTGS2 | 17272774 |                           |
| Expression: AKT1 ---> PTGS2 | 15653566 |                           |
| Expression: AKT1 ---> PTGS2 | 15653566 |                           |

Expression: AKT1 ---> PTGS2 15653566  
Expression: AKT1 ---> PTGS2 15653566  
Expression: AKT1 ---> PTGS2 11742537  
Expression: AKT1 ---> PTGS2 18703638  
Expression: AKT1 ---> PTGS2 17287275  
Expression: AKT1 ---> PTGS2 22805054 10.1158/1940-6207.CAPR-11-0397  
Expression: AKT1 ---> PTGS2 22767315 10.3892/i jmm. 2012. 1052  
Expression: AKT1 ---> PTGS2 23037157 10.1248/bpb. b12-00037  
Expression: AKT1 ---> PTGS2 22747786 10.1186/1742-2094-9-152  
Expression: AKT1 ---> PTGS2 22962522 10.3164/jcfn. 11-94  
Expression: AKT1 ---> PTGS2 22962522 10.3164/jcfn. 11-94  
Expression: AKT1 ---> PTGS2 22962522 10.3164/jcfn. 11-94  
Expression: AKT1 ---> PTGS2 23229294 10.3892/or. 2012. 2158  
Expression: AKT1 ---> PTGS2 21877194 10.1007/s12032-011-0056-0  
Expression: AKT1 ---> PTGS2 23254481 10.3892/i jmm. 2012. 1216  
Expression: AKT1 ---> PTGS2 23243000 10.1091/mbc. E12-08-0637  
Expression: AKT1 ---> PTGS2 20954072 10.1080/15287394. 2010. 511551  
Expression: AKT1 ---> PTGS2 21525012 10.1074/jbc. M110. 207571  
Expression: AKT1 ---> PTGS2 21776820 10.3727/096504011X13021877989711  
Expression: AKT1 ---> PTGS2 21776820 10.3727/096504011X13021877989711  
Expression: AKT1 ---> PTGS2 22109885 10.1210/en. 2011-1438  
Expression: AKT1 ---> PTGS2 22109885 10.1210/en. 2011-1438  
Expression: AKT1 ---> PTGS2 22280146 10.1089/jmf. 2011. 1701  
Expression: AKT1 ---> PTGS2 19517063 10.1007/s10637-009-9274-0  
Expression: AKT1 ---> PTGS2 19517063 10.1007/s10637-009-9274-0  
Expression: AKT1 ---> PTGS2 20224909 10.1007/s11033-010-0035-0  
Expression: AKT1 ---> PTGS2 20446020 10.1007/s11010-010-0469-7  
Expression: AKT1 ---> PTGS2 20446020 10.1007/s11010-010-0469-7  
Expression: AKT1 ---> PTGS2 20446020 10.1007/s11010-010-0469-7  
Expression: AKT1 ---> PTGS2 21140284 10.1007/s11010-010-0682-4  
Expression: AKT1 ---> PTGS2 21745389 10.1186/1471-2199-12-29  
Expression: AKT1 ---> PTGS2 21813027 10.1186/1471-2407-11-334  
Expression: AKT1 ---> PTGS2 21813027 10.1186/1471-2407-11-334  
Expression: AKT1 ---> PTGS2 23146919 10.1097/MPA. 0b013e318269d076  
Expression: AKT1 ---> PTGS2 23515290 10.1210/en. 2012-2074  
Expression: AKT1 ---> PTGS2 23747884 10.2741/4180  
Expression: AKT1 ---> PTGS2 23859016 10.1139/bcb-2012-0077  
Expression: AKT1 ---> PTGS2 23272913 10.2174/18715206113139990119  
Expression: AKT1 ---> PTGS2 24174713 10.1155/2013/964012  
Expression: AKT1 ---> PTGS2 24174713 10.1155/2013/964012  
Expression: AKT1 ---> PTGS2 21533119 10.1371/journal. pone. 0018823  
Expression: AKT1 ---> PTGS2 10.1194/jlr. R037762  
Expression: AKT1 ---> PTGS2 10.1194/jlr. R037762

Expression: AKT1 ---> PTGS2 24092824 10.1210/jc.2013-2662  
 Expression: AKT1 ---> PTGS2 24220687 10.3892/or.2013.2843  
 Expression: AKT1 ---> PTGS2 24395886 10.1084/jem.20131080  
 Expression: AKT1 ---> PTGS2 24395886 10.1084/jem.20131080  
 Expression: AKT1 ---> PTGS2 24395886 10.1084/jem.20131080  
 Expression: AKT1 ---> PTGS2 10.1194/jlr.R039297  
 Expression: AKT1 ---> PTGS2 24377653 10.1080/01635581.2014.864420  
 Expression: AKT1 ---> PTGS2 24329111 10.2174/1389200214666131211155613  
 Expression: AKT1 ---> PTGS2 24634601 10.4196/kjpp.2014.18.1.79  
 Expression: AKT1 ---> PTGS2 24400871 10.1089/thy.2013.0614  
 Expression: AKT1 ---> PTGS2 24969217 10.1530/ERC-13-0450  
 Expression: AKT1 ---> PTGS2 10.1194/jlr.M047738  
 Expression: AKT1 ---> PTGS2 24062397 10.1200/JCO.2013.50.0322  
 Expression: AKT1 ---> PTGS2 25177723 10.1155/2014/397430  
 Expression: AKT1 ---> PTGS2  
 Expression: AKT1 ---> PTGS2 25553470 10.2741/4328  
 Expression: AKT1 ---> PTGS2 10.1530/JOE-14-0470  
 Expression: AKT1 ---> PTGS2 22442157 10.1152/ajpgi.00460.2011  
 Expression: AKT1 ---> PTGS2 22773695 10.1152/ajplung.00090.2012  
 Expression: AKT1 ---> PTGS2 22613973 10.1159/000171028  
 Expression: AKT1 ---> PTGS2 22613973 10.1159/000171028  
 Expression: AKT1 ---> PTGS2 20943963 10.1128/JVI.01065-10  
 Expression: AKT1 ---> PTGS2 23899566 10.1152/physrev.00004.2012  
 Expression: AKT1 ---> PTGS2 25710724 10.3390/ijms16034453  
 Expression: AKT1 ---> PTGS2 25710724 10.3390/ijms16034453  
 Expression: AKT1 ---> PTGS2 26159723 10.1186/s12943-015-0406-1  
 Expression: AKT1 ---> PTGS2 11289146  
 Expression: AKT1 ---> PTGS2 11289146  
 Expression: AKT1 ---> PTGS2 15067356  
 Expression: AKT1 ---> PTGS2 15067356  
 Expression: AKT1 ---> PTGS2 15016316  
 Expression: AKT1 ---> PTGS2 15322248  
 Expression: AKT1 ---> PTGS2 15322248  
 Expression: AKT1 ---> PTGS2 15322248  
 Expression: AKT1 ---> PTGS2 16044407  
 Expression: AKT1 ---> PTGS2 16044407  
 Expression: AKT1 ---> PTGS2 16508949  
 Expression: AKT1 ---> PTGS2 16508949  
 Expression: AKT1 ---> PTGS2 16508949  
 Expression: AKT1 ---> PTGS2 17143555

Expression: AKT1 ---> PTGS2 17223196  
 Expression: AKT1 ---> PTGS2 17272774  
 Expression: AKT1 ---> PTGS2 17472471  
 Expression: AKT1 ---> PTGS2 17825254  
 Expression: AKT1 ---> PTGS2 18097584  
 Expression: AKT1 ---> PTGS2 18192694 10.1093/carcin/bgm299  
 Expression: AKT1 ---> PTGS2 18771702 10.1016/j.mce.2008.08.004  
 Expression: AKT1 ---> PTGS2 19118901 10.1016/j.molimm.2008.11.006  
 Expression: AKT1 ---> PTGS2 19106818 10.1097/SHK.0b013e31819940cb  
 Expression: AKT1 ---> PTGS2 19616084 10.1016/j.toxlet.2009.07.012  
 Expression: AKT1 ---> PTGS2 19616084 10.1016/j.toxlet.2009.07.012  
 Expression: AKT1 ---> PTGS2 19781629 10.1016/j.cellsig.2009.09.014  
 Expression: AKT1 ---> PTGS2 19781629 10.1016/j.cellsig.2009.09.014  
 Expression: AKT1 ---> PTGS2 20333648 10.1002/jcp.22133  
 Expression: AKT1 ---> PTGS2 20451669 10.1016/j.intimp.2010.04.026  
 Expression: AKT1 ---> PTGS2 21678415 10.1002/jcp.22880  
 Expression: AKT1 ---> PTGS2 22390933 10.1016/j.bbrc.2012.02.103  
 Expression: AKT1 ---> PTGS2 22613973 10.1159/000171028  
 Expression: AKT1 ---> PTGS2 22747786 10.1186/1742-2094-9-152  
 Expression: AKT1 ---> PTGS2 23254481 10.3892/ijmm.2012.1216  
 Expression: AKT1 ---> PTGS2 24016823 10.1016/j.yexpr.2013.08.026  
 Expression: AKT1 ---> PTGS2 24296130 10.1016/j.fct.2013.11.035  
 Expression: AKT1 ---> PTGS2 24486459 10.1016/j.neuint.2014.01.010  
 Expression: AKT1 ---> PTGS2 24859472 10.3892/mmr.2014.2259  
 Expression: AKT1 ---> PTGS2 24969217 10.1530/ERC-13-0450  
 Expression: AKT1 ---> PTGS2 25454762 10.1016/j.nutres.2014.10.002  
 Expression: AKT1 ---> PTGS2 25869400 10.1016/j.mce.2015.04.005  
 Expression: AKT1 ---> PTGS2 25869400 10.1016/j.mce.2015.04.005  
 Expression: AKT1 ---> PTGS2 26522220 10.1016/j.bbrc.2015.10.133  
 Expression: AKT1 ---> PTGS2 26546510 10.1016/j.expneurol.2015.11.001  
 Expression: AKT1 ---> PTGS2 26712086 10.1016/j.clon.2015.11.008  
 Expression: AKT1 ---> PTGS2 26341413 10.1016/j.intimp.2015.08.028  
 Expression: AKT1 ---> PTGS2 26238650 10.3892/ijo.2015.3110  
 Expression: AKT1 ---> PTGS2 26238650 10.3892/ijo.2015.3110  
 Expression: AKT1 ---> PTGS2 26238650 10.3892/ijo.2015.3110  
 Expression: AKT1 ---> PTGS2 26604433 10.1155/2015/831059  
 Expression: AKT1 ---> PTGS2 26608500 10.1007/s00011-015-0895-910.1007/s00011-015-0  
 Expression: AKT1 ---> PTGS2 25665524 10.1038/ncomms7221  
 Expression: AKT1 ---> PTGS2 26898122 10.1016/j.lfs.2016.02.060  
 Expression: AKT1 ---> PTGS2 1348 10.1016/j.clon.2015.11.008  
 Expression: AKT1 ---> PTGS2 10.1074/jbc.M115.668277  
 Expression: AKT1 ---> PTGS2 27703516 10.3892/etm.2016.3642  
 Expression: AKT1 ---> PTGS2 28585217 10.1007/978-3-319-48382-5\_25  
 Expression: AKT1 ---> PTGS2 28647573 10.1016/j.cellsig.2017.06.01210.1016/j.cellsi  
 Expression: AKT1 ---> PTGS2 29031211 10.1016/j.jphotobiol.2017.10.00610.1016/j.jph  
 Expression: AKT1 ---> PTGS2 29154739 10.1017/S002202991700067X10.1017/S00220299170  
 Expression: AKT1 ---> PTGS2 29068698 10.1080/01635581.2017.1367940

Expression: AKT1 ---> PTGS2 29894800 10.1016/j.tiv.2018.06.00810.1016/j.tiv.2018.0  
 Expression: AKT1 ---> PTGS2 29906814 10.1055/a-0637-993610.1055/a-0637-9936  
 Expression: AKT1 ---> PTGS2 10.1097/CMR.00000000000000368  
 Expression: AKT1 ---> PTGS2 29962177 10.4077/CJP.2018.BAG562  
 Expression: AKT1 ---> PTGS2 29906814 10.1055/a-0637-9936  
 Expression: AKT1 ---> PTGS2 30406888 10.1007/s11033-018-4378-2  
 Expression: AKT1 ---> PTGS2 30806292 10.1615/JEnvironPatholToxicolOncol.2018026684  
 Expression: AKT1 ---> PTGS2 30877761 10.1093/abbs/gmz01410.1093/abbs/gmz014  
 Expression: AKT1 ---> PTGS2 31300611 10.1124/jpet.119.25750110.1124/jpet.119.25750  
 Expression: AKT1 ---> PTGS2 31300611 10.1124/jpet.119.25750110.1124/jpet.119.25750  
 Expression: AKT1 ---> PTGS2 31377156 10.1016/j.ejphar.2019.17258610.1016/j.ejphar.  
 Expression: AKT1 ---> PTGS2 10.1042/BSR20191255  
 Expression: AKT1 ---> PTGS2 10.1186/s13058-019-1224-y  
 Expression: AKT1 ---> PTGS2 10.1007/s00403-019-01968-z  
 Expression: AKT1 ---> PTGS2 10.2174/1568009620666200101094736  
 Expression: AKT1 ---> PTGS2 10.1155/2020/7642019  
 Expression: AKT1 ---> PTGS2 33081347 10.3390/ijms2120767510.3390/ijms21207675  
 Expression: AKT1 ---> PTGS2 33081347 10.3390/ijms21207675  
 Expression: AKT1 ---> PTGS2 33132637 10.3748/wjg.v26.i38.582210.3748/wjg.v26.i38.5  
 Expression: AKT1 ---> PTGS2 32859885 10.4103/CJP.CJP\_44\_20  
 Expression: AKT1 ---> PTGS2 10.5603/FHC.a2020.0025  
 Expression: AKT1 ---> PTGS2 32981501 10.2174/1389450121666200925150022  
 Expression: AKT1 ---> PTGS2 33167824 10.2174/0929867327666201109122025  
 Expression: AKT1 ---> PTGS2 35130451 10.1128/iai.00672-21  
 Expression: AKT1 ---> PTGS2 35038134 10.1007/s12640-022-00473-y  
 Expression: AKT1 ---> PTGS2 35575922 10.1007/978-981-19-1592-5\_6  
 Expression: AKT1 ---> PTGS2 36430378 10.3390/ijms232213892  
 Expression: AKT1 ---> PTGS2 36552163 10.3390/brainsci12121703  
 positive Regulation: GPER1 --> #27301862 10.1182/blood-2016-03-708263  
 positive Regulation: GPER1 --> #29382535 10.1016/j.ejphar.2018.01.040  
 positive Regulation: GPER1 --> #29382535 10.1016/j.ejphar.2018.01.040  
 positive Regulation: GPER1 --> #30641053 10.1053/j.gastro.2019.01.010  
 positive Regulation: GPER1 --> #25960081 10.1016/j.yhbeh.2015.05.001  
 positive Regulation: GPER1 --> #12904304 10.1074/jbc.M303180200  
 positive Regulation: GPER1 --> #30905784 10.1016/j.lfs.2019.03.049  
 positive Regulation: GPER1 --> #31891720 10.1016/j.lfs.2019.117211  
 positive Regulation: GPER1 --> #26850467 10.1016/j.steroids.2016.01.021  
 positive Regulation: GPER1 --> #27940299 10.1016/j.mce.2016.12.007  
 positive Regulation: GPER1 --> #27940299 10.1016/j.mce.2016.12.007  
 positive Regulation: GPER1 --> #33444670 10.1016/j.mce.2021.111158  
 positive Regulation: GPER1 --> #29526689 10.1016/j.neuroscience.2018.02.048  
 positive Regulation: GPER1 --> #28595943 10.1016/j.jsbmb.2017.05.005  
 positive Regulation: GPER1 --> #28595943 10.1016/j.jsbmb.2017.05.005  
 positive Regulation: GPER1 --> #32289430 10.1016/j.jsbmb.2020.105671  
 positive Regulation: GPER1 --> #27423484 10.1016/j.jphs.2016.06.005  
 positive Regulation: GPER1 --> #26842883 10.1016/j.molonc.2016.01.002  
 positive Regulation: GPER1 --> #26842883 10.1016/j.molonc.2016.01.002  
 positive Regulation: GPER1 --> #31706983 10.1016/j.chembiol.2019.10.009  
 positive Regulation: GPER1 --> AKT1 10.1016/j.endmts.2021.100080  
 positive Regulation: GPER1 --> #23142288 10.1016/j.canlet.2012.10.037  
 positive Regulation: GPER1 --> #23545157 10.1016/j.mce.2013.03.018  
 positive Regulation: GPER1 --> #24240011 10.1016/j.steroids.2013.11.004  
 positive Regulation: GPER1 --> #23911898 10.1016/j.mce.2013.07.026  
 positive Regulation: GPER1 --> #23907016 10.1016/j.jsbmb.2013.07.011

positive Regulation: GPER1 --> #23907016 10.1016/j.jsbmb.2013.07.011  
positive Regulation: GPER1 --> #23907016 10.1016/j.jsbmb.2013.07.011  
positive Regulation: GPER1 --> #23907016 10.1016/j.jsbmb.2013.07.011  
positive Regulation: GPER1 --> #24594140 10.1016/j.mce.2014.01.024  
positive Regulation: GPER1 --> #24726471 10.1016/j.neurobiolaging.2014.03.017  
positive Regulation: GPER1 --> #24835924 10.1016/j.mce.2014.05.005  
positive Regulation: GPER1 --> #25892506 10.1016/j.neuropharm.2015.04.006  
positive Regulation: GPER1 --> #26189910 10.1016/j.jsbmb.2015.06.014  
positive Regulation: GPER1 --> #26497404 10.1016/j.yjmcc.2015.10.024  
positive Regulation: GPER1 --> #26432358 10.1016/j.mce.2015.09.032  
positive Regulation: GPER1 --> #12904304  
positive Regulation: GPER1 --> #18635483  
positive Regulation: GPER1 --> #17878225  
positive Regulation: GPER1 --> #27193386 10.1007/s40263-016-0343-6  
positive Regulation: GPER1 --> #27407175 10.1042/BSR20160134  
positive Regulation: GPER1 --> #27481507 10.1007/s00441-016-2466-y  
positive Regulation: GPER1 --> #27796870 10.1007/s12031-016-0856-y  
positive Regulation: GPER1 --> #27796870 10.1007/s12031-016-0856-y  
positive Regulation: GPER1 --> #28535016 10.3892/or.2017.5649  
positive Regulation: GPER1 --> #29436590 10.3892/ijmm.2018.3470  
positive Regulation: GPER1 --> #29167148 10.1152/ajpcell.00060.2017  
positive Regulation: GPER1 --> #29167148 10.1152/ajpcell.00060.2017  
positive Regulation: GPER1 --> #25588050 10.4161/19336918.2014.990781  
positive Regulation: GPER1 --> #25588050 10.4161/19336918.2014.990781  
positive Regulation: GPER1 --> #25588050 10.4161/19336918.2014.990781  
positive Regulation: GPER1 --> #29566418 10.1055/s-0044-100920  
positive Regulation: GPER1 --> #30173650 10.2174/1871520618666180830162517  
positive Regulation: GPER1 --> #33097048 10.1186/s12974-020-01998-9  
positive Regulation: GPER1 --> #32180008 10.1007/s00709-020-01488-y  
positive Regulation: GPER1 --> #34098945 10.1186/s12935-021-02003-w  
positive Regulation: GPER1 --> #34182538 10.18632/aging.203145  
positive Regulation: GPER1 --> #22922893 10.3892/ijo.2012.1591  
positive Regulation: GPER1 --> #22075757 10.3892/or.2011.1536  
positive Regulation: GPER1 --> #19911269 10.1007/s10549-009-0624-6  
positive Regulation: GPER1 --> #19911269 10.1007/s10549-009-0624-6  
positive Regulation: GPER1 --> #23756388  
positive Regulation: GPER1 --> #23840305 10.1371/journal.pone.0064771  
positive Regulation: GPER1 --> #23840305 10.1371/journal.pone.0064771  
positive Regulation: GPER1 --> #25744245 10.1007/s12032-015-0558-2  
positive Regulation: GPER1 --> #26183213 10.1242/dmm.021071  
positive Regulation: GPER1 --> #29365274 10.1152/AJPCELL.00152.2017  
positive Regulation: GPER1 --> #34445359 10.3390/ijms22168654  
positive Regulation: GPER1 --> #34576301 10.3390/ijms221810138  
positive Regulation: GPER1 --> #32873626 10.1158/1541-7786.MCR-20-017310.1158/1541-778  
positive Regulation: GPER1 --> #23840305 10.1371/journal.pone.006477110.1371/journal.p  
positive Regulation: GPER1 --> #852 10.1016/j.jphs.2016.06.005  
positive Regulation: GPER1 --> AKT1 10.1016/j.molonc.2016.01.002  
positive Regulation: GPER1 --> AKT1 10.1016/j.molonc.2016.01.002  
positive Regulation: GPER1 --> AKT1 10.1042/BSR20160134  
positive Regulation: GPER1 --> #26183213 10.1242/dmm.021071  
positive Regulation: GPER1 --> #26356837 10.1371/journal.pone.0135988





positive Expression: PPARG --> (18332871  
 positive Expression: PPARG --> (16306131  
 positive Expression: PPARG --> GCLC  
 Regulation: SFRP1 ---> AKT1 11278246 10.1074/jbc.C000880200  
 Regulation: SFRP1 ---> AKT1 11278246  
 Regulation: SFRP1 ---> AKT1 15920021  
 Regulation: SFRP1 ---> AKT1  
 Regulation: PTGS2 ---> AKT1 27916554 10.1016/j.ejphar.2016.11.052  
 Regulation: PTGS2 ---> AKT1 29750896 10.1016/j.yexcr.2018.05.008  
 Regulation: PTGS2 ---> AKT1 25064845 10.1016/j.febslet.2014.07.012  
 Regulation: PTGS2 ---> AKT1 25064845 10.1016/j.febslet.2014.07.012  
 Regulation: PTGS2 ---> AKT1 21561856 10.1074/jbc.M111.222349  
 Regulation: PTGS2 ---> AKT1 21561856 10.1074/jbc.M111.222349  
 Regulation: PTGS2 ---> AKT1 16966336 10.1074/jbc.M600135200  
 Regulation: PTGS2 ---> AKT1 20042609 10.1074/jbc.M109.027086  
 Regulation: PTGS2 ---> AKT1 28407559 10.1016/j.molimm.2017.04.004  
 Regulation: PTGS2 ---> AKT1 28479391 10.1016/j.fct.2017.05.006  
 Regulation: PTGS2 ---> AKT1 32640310 10.1016/j.gene.2020.144932  
 Regulation: PTGS2 ---> AKT1 21551001 10.1093/annonc/mdr266  
 Regulation: PTGS2 ---> AKT1 29625858 10.1016/j.cyto.2018.03.032  
 Regulation: PTGS2 ---> AKT1 31005030 10.1016/j.drup.2019.04.001  
 Regulation: PTGS2 ---> AKT1 33152664 10.1016/j.redox.2020.101774  
 Regulation: PTGS2 ---> AKT1 21689625 10.1016/j.ajpath.2011.04.004  
 Regulation: PTGS2 ---> AKT1 21147091 10.1016/j.ejphar.2010.11.022  
 Regulation: PTGS2 ---> AKT1 18722373 10.1053/j.gastro.2008.07.012  
 Regulation: PTGS2 ---> AKT1 17418864 10.1016/j.jss.2007.01.039  
 Regulation: PTGS2 ---> AKT1 17198778 10.1016/j.jtcvs.2006.07.042  
 Regulation: PTGS2 ---> AKT1 18343442 10.1016/j.juro.2007.12.037  
 Regulation: PTGS2 ---> AKT1 16360450 10.1016/j.urology.2005.06.076  
 Regulation: PTGS2 ---> AKT1 15179620 10.1053/j.seminonc.2004.03.040  
 Regulation: PTGS2 ---> AKT1 18812189 10.1016/j.imlet.2008.08.004  
 Regulation: PTGS2 ---> AKT1 18375246 10.1016/j.arcmed.2007.12.005  
 Regulation: PTGS2 ---> AKT1 12618325 10.1016/S0304-3835(02)00524-4  
 Regulation: PTGS2 ---> AKT1 18790560 10.1016/j.canlet.2008.08.012  
 Regulation: PTGS2 ---> AKT1 22546756 10.1016/j.mehy.2012.04.012  
 Regulation: PTGS2 ---> AKT1 18571350 10.1016/j.jep.2008.05.001  
 Regulation: PTGS2 ---> AKT1 18571350 10.1016/j.jep.2008.05.001  
 Regulation: PTGS2 ---> AKT1 20362052 10.1016/j.cellsig.2010.03.014  
 Regulation: PTGS2 ---> AKT1 16002278 10.1016/j.ejca.2005.04.013  
 Regulation: PTGS2 ---> AKT1 18178094 10.1016/j.nbd.2007.11.010  
 Regulation: PTGS2 ---> AKT1 15661561 10.1016/j.critrevonc.2004.10.001  
 Regulation: PTGS2 ---> AKT1 16531064 10.1016/j.critrevonc.2006.01.003  
 Regulation: PTGS2 ---> AKT1 21807123 10.1016/j.intimp.2011.07.011  
 Regulation: PTGS2 ---> AKT1 10.1016/j.jecm.2010.08.003  
 Regulation: PTGS2 ---> AKT1 20854947 10.1016/j.bone.2010.09.020  
 Regulation: PTGS2 ---> AKT1 20854947 10.1016/j.bone.2010.09.020  
 Regulation: PTGS2 ---> AKT1 20854947 10.1016/j.bone.2010.09.020  
 Regulation: PTGS2 ---> AKT1 20854947 10.1016/j.bone.2010.09.020

Regulation: PTGS2 ---> AKT1 20854947 10.1016/j.bone.2010.09.020  
 Regulation: PTGS2 ---> AKT1 20854947 10.1016/j.bone.2010.09.020  
 Regulation: PTGS2 ---> AKT1 20854947 10.1016/j.bone.2010.09.020  
 Regulation: PTGS2 ---> AKT1 20854947 10.1016/j.bone.2010.09.020  
 Regulation: PTGS2 ---> AKT1 20854947 10.1016/j.bone.2010.09.020  
 Regulation: PTGS2 ---> AKT1 20854947 10.1016/j.bone.2010.09.020  
 Regulation: PTGS2 ---> AKT1 20854947 10.1016/j.bone.2010.09.020  
 Regulation: PTGS2 ---> AKT1 20854947 10.1016/j.bone.2010.09.020  
 Regulation: PTGS2 ---> AKT1 23422333 10.1016/j.jep.2013.02.001  
 Regulation: PTGS2 ---> AKT1 23563277 10.1016/j.pharmthera.2013.04.001  
 Regulation: PTGS2 ---> AKT1 24465039 10.1016/j.curtheres.2013.06.001  
 Regulation: PTGS2 ---> AKT1 23907017 10.1016/j.jsbmb.2013.07.008  
 Regulation: PTGS2 ---> AKT1 24296130 10.1016/j.fct.2013.11.035  
 Regulation: PTGS2 ---> AKT1 25770423 10.1016/j.bbrc.2015.03.008  
 Regulation: PTGS2 ---> AKT1 20022932  
 Regulation: PTGS2 ---> AKT1 21078168  
 Regulation: PTGS2 ---> AKT1 21078168  
 Regulation: PTGS2 ---> AKT1 20042609  
 Regulation: PTGS2 ---> AKT1 19052170  
 Regulation: PTGS2 ---> AKT1 16966336  
 Regulation: PTGS2 ---> AKT1 15016316  
 Regulation: PTGS2 ---> AKT1 19099539  
 Regulation: PTGS2 ---> AKT1 16800815  
 Regulation: PTGS2 ---> AKT1 20661229  
 Regulation: PTGS2 ---> AKT1 17285134  
 Regulation: PTGS2 ---> AKT1 16160697  
 Regulation: PTGS2 ---> AKT1 16396944  
 Regulation: PTGS2 ---> AKT1 16396944  
 Regulation: PTGS2 ---> AKT1 34404424 10.1186/s13046-021-02050-1  
 Regulation: PTGS2 ---> AKT1 33662521 10.1016/j.alcohol.2020.08.00710.1016/j.alcohc  
 Regulation: PTGS2 ---> AKT1 22784710 10.1158/1535-7163.MCT-12-034210.1158/1535-716  
 Regulation: PTGS2 ---> AKT1 723 10.1016/j.cyto.2018.03.032  
 Regulation: PTGS2 ---> AKT1 10.1016/j.mehy.2012.04.012  
 Regulation: PTGS2 ---> AKT1 16014934  
 Regulation: PTGS2 ---> AKT1 16014934  
 Regulation: PTGS2 ---> AKT1 17259595  
 Regulation: PTGS2 ---> AKT1 25422106 10.2337/db14-0979  
 Regulation: PTGS2 ---> AKT1 27056726 10.1152/ajpgi.00428.2015  
 Regulation: PTGS2 ---> AKT1 10.2174/1389557516666160505115743  
 Regulation: PTGS2 ---> AKT1 10.2174/1389557516666160505115743  
 Regulation: PTGS2 ---> AKT1 10.2174/1573406412666160622130036  
 Regulation: PTGS2 ---> AKT1 27994517 10.7150/ijbs.15943  
 Regulation: PTGS2 ---> AKT1 29048666 10.3892/or.2017.5981  
 Regulation: PTGS2 ---> AKT1 29110215 10.1007/s10456-017-9583-4  
 Regulation: PTGS2 ---> AKT1 10.1097/CMR.0000000000000368  
 Regulation: PTGS2 ---> AKT1 10.1097/IGC.0000000000001269  
 Regulation: PTGS2 ---> AKT1 10.1002/JLB.3HI0518-193R  
 Regulation: PTGS2 ---> AKT1 10.1186/s13046-019-1361-2  
 Regulation: PTGS2 ---> AKT1 10.1186/s13046-019-1361-2

Regulation: PTGS2 ----> AKT1 10. 1186/s13046-019-1361-2  
 Regulation: PTGS2 ----> AKT1 10. 1186/s13046-019-1361-2  
 Regulation: PTGS2 ----> AKT1 23229294 10. 3892/or. 2012. 2158  
 Regulation: PTGS2 ----> AKT1 23243000 10. 1091/mbc. E12-08-0637  
 Regulation: PTGS2 ----> AKT1 20203246 10. 1164/rccm. 200905-06740C  
 Regulation: PTGS2 ----> AKT1 20203246 10. 1164/rccm. 200905-06740C  
 Regulation: PTGS2 ----> AKT1 10. 1186/s13046-019-1361-2  
 Regulation: PTGS2 ----> AKT1 10. 1248/bpb. b19-00222  
 Regulation: PTGS2 ----> AKT1 31380437 10. 1155/2019/758745110. 1155/2019/7587451  
 Regulation: PTGS2 ----> AKT1 31380437 10. 1155/2019/758745110. 1155/2019/7587451  
 Regulation: PTGS2 ----> AKT1 31438982 10. 1186/s13046-019-1361-210. 1186/s13046-019-1  
 Regulation: PTGS2 ----> AKT1 31438982 10. 1186/s13046-019-1361-210. 1186/s13046-019-1  
 Regulation: PTGS2 ----> AKT1 15492414 10. 1111/j. 1346-8138. 2004. tb00547. x  
 Regulation: PTGS2 ----> AKT1 23149922 10. 1158/0008-5472. CAN-12-222010. 1158/0008-547  
 Regulation: PTGS2 ----> AKT1 19505457 10. 1016/j. yexpr. 2009. 06. 002  
 Regulation: PTGS2 ----> AKT1 16014934  
 Regulation: PTGS2 ----> AKT1 19687189 10. 1093/ecam/nep108  
 Regulation: PTGS2 ----> AKT1 21561856 10. 1074/jbc. M111. 222349  
 Regulation: PTGS2 ----> AKT1 21561856 10. 1074/jbc. M111. 222349  
 Regulation: PTGS2 ----> AKT1 19293251 10. 1093/ecam/nep020  
 Regulation: PTGS2 ----> AKT1 20467837 10. 1007/s12035-010-8139-z  
 Regulation: PTGS2 ----> AKT1 20803081 10. 1245/s10434-010-1268-9  
 Regulation: PTGS2 ----> AKT1 21078168 10. 1186/1471-2407-10-626  
 Regulation: PTGS2 ----> AKT1 21078168 10. 1186/1471-2407-10-626  
 Regulation: PTGS2 ----> AKT1 21457561 10. 1186/1743-422X-8-155  
 Regulation: PTGS2 ----> AKT1 30367494 10. 1002/jcp. 2751510. 1002/jcp. 27515  
 Regulation: PTGS2 ----> AKT1 32797349 10. 1007/s11033-020-05709-8  
 Regulation: PTGS2 ----> AKT1 33152664 10. 1016/j. redox. 2020. 10177410. 1016/j. redox. 20  
 Regulation: PTGS2 ----> AKT1 33152664 10. 1016/j. redox. 2020. 10177410. 1016/j. redox. 20  
 Regulation: PTGS2 ----> AKT1 32902794 10. 1007/s00432-020-03383-8  
 Regulation: PTGS2 ----> AKT1 29630111 10. 26355/eurrev\_201803\_14579  
 Regulation: PTGS2 ----> AKT1 10. 1124/jpet. 118. 254359  
 Regulation: PTGS2 ----> AKT1 33893997 10. 1007/s12033-021-00326-7  
 Regulation: PTGS2 ----> AKT1 33893997 10. 1007/s12033-021-00326-7  
 Regulation: PTGS2 ----> AKT1 34127813 10. 1038/s41388-021-01858-7  
 Regulation: PTGS2 ----> AKT1 34664237 10. 1007/978-3-030-73119-9\_7  
 Regulation: PTGS2 ----> AKT1  
 Regulation: PTGS2 ----> AKT1 34917200 10. 1155/2021/4114593  
 Regulation: PTGS2 ----> AKT1 34917200 10. 1155/2021/4114593  
 Regulation: PTGS2 ----> AKT1 35031925 10. 1007/s11033-021-07063-9  
 Regulation: PTGS2 ----> AKT1 35732325 10. 21873/cgp. 20335  
 Regulation: PTGS2 ----> AKT1 35780223 10. 1007/s00018-022-04430-y  
 negative Regulation: MAPK1 ----| c 30257357 10. 1016/j. biopha. 2018. 08. 132  
 negative Regulation: MAPK1 ----| c 17690186 10. 2353/ajpath. 2007. 070010  
 negative Regulation: MAPK1 ----| c 30257357 10. 1016/j. biopha. 2018. 08. 132  
 negative Regulation: MAPK1 ----| c 17482503 10. 1016/j. drup. 2007. 03. 003  
 negative Regulation: MAPK1 ----| c 23073477 10. 1016/j. canlet. 2012. 10. 004  
 negative Regulation: MAPK1 ----| c 28849180 10. 3892/or. 2017. 5908  
 negative Regulation: MAPK1 ----| c 31133044 10. 1186/s13046-019-1226-8  
 negative Regulation: MAPK1 ----| c 32039627 10. 4149/neo\_2020\_190604N486  
 negative Regulation: MAPK1 ----| c 24104394 10. 1038/leu. 2013. 291  
 negative Regulation: MAPK1 ----| c 30257357 10. 1016/j. biopha. 2018. 08. 13210. 1016/j. biopha.  
 negative Regulation: MAPK1 ----| c 22179790 10. 3892/ijo. 2011. 1303  
 negative Regulation: MAPK1 ----| c 22179790 10. 3892/ijo. 2011. 1303

negative Regulation: MAPK1 ---| c22179790 10.3892/ijo.2011.1303  
negative Regulation: MAPK1 ---| c26316041 10.3892/ijo.2015.3137  
negative Regulation: MAPK1 ---| c22179790 10.3892/ijo.2011.1303  
negative Regulation: MAPK1 ---| c22179790 10.3892/ijo.2011.1303  
negative Regulation: MAPK1 ---| chemosensitivity  
negative Regulation: CLDN1 ---| F35686527 10.1631/jzus.B2100988  
Binding: NOTCH1 ---- LRP8 30304853 10.3390/ijms19103090  
Regulation: CD274 ---> PPARG 33218268 10.1080/15384047.2020.183803210.1080/15384047  
Regulation: CD274 ---> PPARG 19535643 10.4049/jimmunol.0804260  
Regulation: CD274 ---> PPARG  
positive Regulation: LRP8 --+> NC21253854 10.1007/s11064-011-0407-4  
positive Regulation: LRP8 --+> NOTCH1  
negative Regulation: TNFAIP8L2 --30114619 10.1016/j.molimm.2018.08.010  
negative Regulation: TNFAIP8L2 --29920292 10.1016/j.canlet.2018.06.017  
negative Regulation: TNFAIP8L2 --27712587 10.3727/096504016X14666990347437  
negative Regulation: TNFAIP8L2 --27779698 10.3892/or.2016.5192  
negative Regulation: TNFAIP8L2 --27779698 10.3892/or.2016.5192  
negative Regulation: TNFAIP8L2 --27779698 10.3892/or.2016.5192  
negative Regulation: TNFAIP8L2 --28186089 10.1038/cgt.2017.3  
negative Regulation: TNFAIP8L2 --28186089 10.1038/cgt.2017.3  
negative Regulation: TNFAIP8L2 --28186089 10.1038/cgt.2017.3  
negative Regulation: TNFAIP8L2 --28287114 10.1038/cmi.2017.4  
negative Regulation: TNFAIP8L2 --28849057 10.3892/mmr.2017.7364  
negative Regulation: TNFAIP8L2 --30015980 10.3892/or.2018.6576  
negative Regulation: TNFAIP8L2 --30157801 10.1186/s12885-018-4761-3  
negative Regulation: TNFAIP8L2 --31591376 10.12659/MSM.917229  
negative Regulation: TNFAIP8L2 --32493031 10.1152/ajplung.00069.2020  
negative Regulation: TNFAIP8L2 --25946186 10.1371/journal.pone.0126176  
negative Regulation: TNFAIP8L2 --25946186 10.1371/journal.pone.0126176  
negative Regulation: TNFAIP8L2 --26530498 10.3892/ijo.2015.3224  
negative Regulation: TNFAIP8L2 --26987289 10.1038/cgt.2016.6  
negative Regulation: TNFAIP8L2 --26987289 10.1038/cgt.2016.6  
negative Regulation: TNFAIP8L2 --25946186 10.1371/journal.pone.012617610.1371/journal.p  
negative Regulation: TNFAIP8L2 --27712587 10.3727/096504016X1466699034743710.3727/09650  
negative Regulation: TNFAIP8L2 --27779698 10.3892/or.2016.519210.3892/or.2016.5192  
negative Regulation: TNFAIP8L2 --30157801 10.1186/s12885-018-4761-310.1186/s12885-018-4  
negative Regulation: TNFAIP8L2 --34446024 10.1186/s12931-021-01826-5  
negative Regulation: TNFAIP8L2 --34446024 10.1186/s12931-021-01826-510.1186/s12931-021-  
negative Regulation: TNFAIP8L2 ---| AKT1 10.1016/j.jsps.2022.05.009  
negative Regulation: TNFAIP8L2 ---| AKT1 10.1016/j.jsps.2022.05.009  
negative Regulation: TNFAIP8L2 --35903524 10.1016/j.jsps.2022.05.00910.1016/j.jsps.2022  
Regulation: STC2 ---> AKT1 30661222 10.1007/s12253-018-00576-y  
Regulation: STC2 ---> AKT1 32900244 10.1089/hum.2020.090  
Regulation: STC2 ---> AKT1 32900244 10.1089/hum.2020.090  
Regulation: STC2 ---> AKT1 27863406 10.18632/oncotarget.1335510.18632/oncotarget.  
Regulation: STC2 ---> AKT1 27863406 10.18632/oncotarget.1335510.18632/oncotarget.  
negative Expression: ING4 ---| SF17848618 10.1182/blood-2007-02-074617  
negative Expression: ING4 ---| SF17848618 10.1182/blood-2007-02-074617  
negative Expression: ING4 ---| SF17848618 10.1182/blood-2007-02-074617  
negative Expression: ING4 ---| SF30643005 10.1042/BSR20180773

negative Expression: ING4 ---| SF17848618 10.1182/blood-2007-02-074617  
 negative Expression: ING4 ---| SF17848618 10.1182/blood-2007-02-074617  
 negative Expression: ING4 ---| SF17848618 10.1182/blood-2007-02-074617  
 negative Expression: ING4 ---| SF17848618 10.1182/blood-2007-02-074617  
 negative Expression: ING4 ---| SF17848618 10.1182/blood-2007-02-074617  
 negative Expression: ING4 ---| SF17848618 10.1182/blood-2007-02-074617  
 negative Expression: ING4 ---| SF35576491 10.1089/jir.2021.0214  
 negative Regulation: BECN1 ---| N32800766 10.1016/j.ygeno.2020.08.009  
 negative Regulation: BECN1 ---| N26837467 10.1038/ncomms10533  
 Regulation: CLDN1 ---> SPP1 26982264 10.1089/dna.2015.3188  
 positive Regulation: PTGS2 --> F15525653 10.1074/jbc.M410006200  
 positive Regulation: PTGS2 --> F16309946 10.1016/j.biocel.2005.10.006  
 positive Regulation: PTGS2 --> F15525653  
 positive Regulation: PTGS2 --> F20339539  
 positive Regulation: PTGS2 --> F21175416  
 positive Regulation: PTGS2 --> F21989184 10.1038/bjc.2011.403  
 positive Regulation: PTGS2 --> F25595899 10.18632/oncotarget.2783  
 positive Regulation: PTGS2 --> RAC1  
 positive Expression: RAC1 --> P115860667 10.1182/blood-2004-12-4975  
 positive Expression: RAC1 --> P115860667 10.1182/blood-2004-12-4975  
 positive Expression: RAC1 --> P115860667 10.1182/blood-2004-12-4975  
 positive Expression: RAC1 --> P120167866 10.2353/ajpath.2010.090714  
 positive Expression: RAC1 --> P119729484 10.2353/ajpath.2009.090443  
 positive Expression: RAC1 --> P121907186 10.1016/j.bbrc.2011.08.116  
 positive Expression: RAC1 --> P119118901 10.1016/j.molimm.2008.11.006  
 positive Expression: RAC1 --> P120004474 10.1016/j.molimm.2009.11.017  
 positive Expression: RAC1 --> P120004474 10.1016/j.molimm.2009.11.017  
 positive Expression: RAC1 --> P120004474 10.1016/j.molimm.2009.11.017  
 positive Expression: RAC1 --> P119110011 10.1016/j.bbamcr.2008.11.009  
 positive Expression: RAC1 --> P118599158 10.1016/j.neurobiolaging.2008.05.017  
 positive Expression: RAC1 --> P115588766 10.1016/j.bbcan.2004.10.002  
 positive Expression: RAC1 --> P115588766 10.1016/j.bbcan.2004.10.002  
 positive Expression: RAC1 --> PTGS2 10.1016/S1359-6446(03)02977-5  
 positive Expression: RAC1 --> P120451669 10.1016/j.intimp.2010.04.026  
 positive Expression: RAC1 --> P112857884  
 positive Expression: RAC1 --> P112360401  
 positive Expression: RAC1 --> P127442365 10.1515/revneuro-2016-0021  
 positive Expression: RAC1 --> P122113496 10.2119/molmed.2011.00447  
 positive Expression: RAC1 --> P124667766 10.1371/journal.pone.0092398  
 positive Expression: RAC1 --> P112857884 10.1091/mbc.e03-01-0016  
 positive Expression: RAC1 --> P116088958 10.1002/jcb.20568  
 positive Expression: RAC1 --> P116088958 10.1002/jcb.20568  
 positive Expression: RAC1 --> P117592548 10.2119/2007 - 00005. Wu  
 positive Expression: RAC1 --> P119118901 10.1016/j.molimm.2008.11.006  
 positive Expression: RAC1 --> P120131316 10.1002/ijc.2522610.1002/ijc.25226

positive Expression: RAC1 --> P112857884  
 positive Expression: RAC1 --> PTGS2 10.1158/1940-6207.CAPR-15-0205-T  
 positive Expression: RAC1 --> PTGS2  
 positive Expression: RAC1 --> P136018772 10.1530/REP-21-0186  
 Regulation: BIRC7 ---> PTEN 21092516  
 Regulation: GPER1 ---> chemosensi26175858  
 Regulation: GPER1 ---> chemosensi35335125 10.3390/molecules27061762  
 negative Expression: PTEN ---| B129436592 10.3892/ijmm.2018.3475  
 Regulation: MCL1 ---> AKT1 33831733 10.1016/j.archoralbio.2021.105114  
 Regulation: MCL1 ---> AKT1 21472003 10.1038/cddis.2011.2210.1038/cddis.2011.22  
 Regulation: MCL1 ---> AKT1 30415256 10.1159/00049506010.1159/000495060  
 Regulation: MCL1 ---> AKT1 33831733 10.1016/j.archoralbio.2021.105114  
 Regulation: MCL1 ---> AKT1 32814093 10.1016/j.jconrel.2020.08.018  
 Regulation: MCL1 ---> AKT1 29361380 10.1016/j.cytogfr.2018.01.002  
 Regulation: MCL1 ---> AKT1 22484311 10.1016/j.bcp.2012.03.015  
 Regulation: MCL1 ---> AKT1 22484311 10.1016/j.bcp.2012.03.015  
 Regulation: MCL1 ---> AKT1 20227039 10.1016/j.ccr.2010.01.021  
 Regulation: MCL1 ---> AKT1 23524145 10.1016/j.yexcr.2013.03.012  
 Regulation: MCL1 ---> AKT1 25801032 10.1016/j.celrep.2015.02.056  
 Regulation: MCL1 ---> AKT1 15782127  
 Regulation: MCL1 ---> AKT1 27102561 10.1152/ajpgi.00327.2015  
 Regulation: MCL1 ---> AKT1 27757735 10.1007/s10495-016-1307-5  
 Regulation: MCL1 ---> AKT1 30415256 10.1159/000495060  
 Regulation: MCL1 ---> AKT1 30415256 10.1159/000495060  
 Regulation: MCL1 ---> AKT1 30415256 10.1159/000495060  
 Regulation: MCL1 ---> AKT1 23158473 10.1186/1476-4598-11-84  
 Regulation: MCL1 ---> AKT1 23517112 10.1186/1471-2407-13-140  
 Regulation: MCL1 ---> AKT1 21472003 10.1038/cddis.2011.22  
 Regulation: MCL1 ---> AKT1 25032861 10.1038/cddis.2014.303  
 Regulation: MCL1 ---> AKT1 26739047 10.1128/JVI.02879-15  
 Regulation: MCL1 ---> AKT1 15782127 10.1038/sj.onc.1208530  
 Regulation: MCL1 ---> AKT1 31662324 10.1158/0008-5472.CAN-19-095010.1158/0008-547  
 Regulation: MCL1 ---> AKT1 35701409 10.1038/s41419-022-04958-810.1038/s41419-022-  
 Regulation: MCL1 ---> AKT1 35744786 10.3390/molecules27123661  
 Regulation: MCL1 ---> AKT1 35701409 10.1038/s41419-022-04958-8  
 Regulation: MCL1 ---> AKT1 36241868 10.1038/s41388-022-02482-9  
 Regulation: B3GNT3 ---> CD274 31874279 10.1016/j.semcaner.2019.11.011  
 Regulation: B3GNT3 ---> CD274 29438695 10.1016/j.ccell.2018.01.009  
 Regulation: B3GNT3 ---> CD274 31287993 10.1016/j.ccell.2019.06.006  
 Regulation: B3GNT3 ---> CD274 32183950 10.1016/j.ccell.2020.02.006

Regulation: B3GNT3 ----> CD274 29765039 10.1038/s41467-018-04313-6  
 Regulation: B3GNT3 ----> CD274 32377193 10.1155/2020/5497015  
 Regulation: B3GNT3 ----> CD274 33159034 10.1038/s41419-020-03140-2  
 Regulation: B3GNT3 ----> CD274 32940722 10.1007/s00018-020-03637-1  
 Regulation: B3GNT3 ----> CD274 35197058 10.1186/s12943-021-01447-y  
 Expression: AKT1 ----> SPP1 27496181 10.1016/j.pbiomolbio.2016.08.003  
 Expression: AKT1 ----> SPP1 27794492 10.1016/j.jconrel.2016.10.024  
 Expression: AKT1 ----> SPP1 19356721 10.1016/j.ejphar.2009.03.063  
 Expression: AKT1 ----> SPP1 19356721 10.1016/j.ejphar.2009.03.063  
 Expression: AKT1 ----> SPP1 19767100 10.1016/j.leukres.2009.08.028  
 Expression: AKT1 ----> SPP1 21056654 10.1016/j.cellsig.2010.10.021  
 Expression: AKT1 ----> SPP1 21056654 10.1016/j.cellsig.2010.10.021  
 Expression: AKT1 ----> SPP1 18952487 10.1016/j.cytogfr.2008.08.001  
 Expression: AKT1 ----> SPP1 17161983 10.1016/j.dld.2006.10.015  
 Expression: AKT1 ----> SPP1 22947282 10.1016/j.acthis.2012.08.004  
 Expression: AKT1 ----> SPP1 24530412 10.1016/j.intimp.2014.01.028  
 Expression: AKT1 ----> SPP1 25986148 10.1016/j.yjmcc.2015.05.006  
 Expression: AKT1 ----> SPP1 25986148 10.1016/j.yjmcc.2015.05.006  
 Expression: AKT1 ----> SPP1 16946008  
 Expression: AKT1 ----> SPP1 16807238  
 Expression: AKT1 ----> SPP1 15347645  
 Expression: AKT1 ----> SPP1 15854023  
 Expression: AKT1 ----> SPP1 12944477  
 Expression: AKT1 ----> SPP1 28715969 10.1089/ars.2017.7275  
 Expression: AKT1 ----> SPP1 29620276 10.3892/mmr.2018.8845  
 Expression: AKT1 ----> SPP1 22965338 10.3892/mmr.2012.1074  
 Expression: AKT1 ----> SPP1 22965338 10.3892/mmr.2012.1074  
 Expression: AKT1 ----> SPP1 21406114 10.1186/1471-2121-12-11  
 Expression: AKT1 ----> SPP1 22675553 10.1371/journal.pone.0038378  
 Expression: AKT1 ----> SPP1 25884410 10.1371/journal.pone.0123318  
 Expression: AKT1 ----> SPP1 26280346 10.1371/journal.pone.0134243  
 Expression: AKT1 ----> SPP1 12944477 10.1128/mcb.23.18.6507-6519.2003  
 Expression: AKT1 ----> SPP1 12944477 10.1128/mcb.23.18.6507-6519.2003  
 Expression: AKT1 ----> SPP1 15705860  
 Expression: AKT1 ----> SPP1 15705860  
 Expression: AKT1 ----> SPP1 16614705  
 Expression: AKT1 ----> SPP1 21406114 10.1186/1471-2121-12-1110.1186/1471-2121-12-1  
 Expression: AKT1 ----> SPP1 24530412 10.1016/j.intimp.2014.01.02810.1016/j.intimp.  
 Expression: AKT1 ----> SPP1 34234236 10.1038/s41598-021-93484-210.1038/s41598-021-



Regulation: NGF ---> GCLC 15877105  
 Regulation: NGF ---> GCLC 7901332 10.1111/j.1471-4159.1993.tb09808.x  
 Regulation: NGF ---> GCLC 8930687  
 Regulation: NGF ---> GCLC 8973794 10.1016/s0006-8993(96)00844-x  
 positive Expression: NGF --> MAF 28636927 10.1016/j.neulet.2017.06.025  
 positive Expression: NGF --> MAF 33985879 10.1016/j.phymed.2021.153576  
 positive Expression: NGF --> MAF 11024454 10.1016/S0014-5793(00)02037-8  
 positive Expression: NGF --> MAF 18328626 10.1016/j.neulet.2008.01.078  
 positive Expression: NGF --> MAF 20138971 10.1016/j.neulet.2010.01.070  
 positive Expression: NGF --> MAF 15207334 10.1016/j.neuroscience.2004.04.036  
 positive Expression: NGF --> MAF 23954826 10.1016/j.neulet.2013.07.057  
 positive Expression: NGF --> MAF 12606768  
 positive Expression: NGF --> MAF 15385613  
 positive Expression: NGF --> MAF 15385613  
 positive Expression: NGF --> MAF 15385613  
 positive Expression: NGF --> MAF 28005222 10.1007/s11064-016-2134-3  
 positive Expression: NGF --> MAF 32362584 10.1124/mol.119.118950  
 positive Expression: NGF --> MAF 32567558 10.1530/REP-19-0601  
 positive Expression: NGF --> MAF 34257579 10.3389/pore.2021.612375  
 positive Expression: NGF --> MAF 22207192 10.1007/s00210-011-0721-z  
 positive Expression: NGF --> MAF 24686445 10.1038/ncomms4527  
 positive Expression: NGF --> MAF 15207334 10.1016/j.neuroscience.2004.04.036  
 positive Expression: NGF --> MAF 22024079 10.5754/hge1122010.5754/hge11220  
 positive Expression: NGF --> MAF 22280975 10.1016/j.neuroscience.2012.01.00210.1016/j.n  
 positive Expression: NGF --> MAF 15153516  
 positive Expression: NGF --> MAF 990 10.1016/j.pan.2016.09.005  
 positive Expression: NGF --> MAF 15555922 10.1016/j.mcn.2004.07.007  
 positive Expression: NGF --> MAF 15555922 10.1016/j.mcn.2004.07.007  
 positive Expression: NGF --> MAF 12764099  
 positive Expression: NGF --> MAF 24006492 10.1091/mbc.E12-06-0445  
 positive Expression: NGF --> MAF 12154004  
 positive Expression: NGF --> MAF 20663926 10.1158/1535-7163.MCT-10-0336  
 positive Expression: NGF --> MAF 16999937 10.1016/j.bcp.2006.08.013  
 positive Expression: NGF --> MAF 21871873 10.1016/j.cbi.2011.08.001  
 positive Expression: NGF --> MAF 15480997 10.1053/j.gastro.2004.06.023  
 positive Expression: NGF --> MAF 12086645 10.1016/S0896-6273(02)00717-1  
 positive Expression: NGF --> MAF 14550783 10.1016/S1044-7431(03)00126-X  
 positive Expression: NGF --> MAF 9658404  
 positive Expression: NGF --> MAF 18367547  
 positive Expression: NGF --> MAF 17380122  
 positive Expression: NGF --> MAF 12764099  
 positive Expression: NGF --> MAF 10349848  
 positive Expression: NGF --> MAF 28762104 10.1007/s11064-017-2333-6  
 positive Expression: NGF --> MAF 28762104 10.1007/s11064-017-2333-6  
 positive Expression: NGF --> MAPK1 10.1530/REP-19-0601  
 positive Expression: NGF --> MAPK1 10.1016/j.phymed.2021.153576  
 positive Expression: NGF --> MAPK1 10.3389/pore.2021.612375  
 positive Expression: NGF --> MAF 35610050 10.1523/JNEUROSCI.1133-21.2022  
 positive Expression: NGF --> MAPK1 10.1016/j.burns.2022.11.001  
 Expression: MAPK1 ---> NGF 28924549 10.1016/j.apsb.2017.06.006  
 Expression: MAPK1 ---> NGF 29872754 10.1016/j.heliyon.2018.e00617  
 Expression: MAPK1 ---> NGF 29872754 10.1016/j.heliyon.2018.e00617  
 Expression: MAPK1 ---> NGF 21241747 10.1016/j.neures.2010.12.016  
 Expression: MAPK1 ---> NGF 17651887 10.1016/j.tox.2007.05.029

Expression: MAPK1 ---> NGF 17651887 10.1016/j.tox.2007.05.029  
 Expression: MAPK1 ---> NGF 23454433 10.1016/j.brainres.2013.02.026  
 Expression: MAPK1 ---> NGF 12925217  
 Expression: MAPK1 ---> NGF 17942717  
 Expression: MAPK1 ---> NGF 29532850 10.3892/ijo.2018.4311  
 Expression: MAPK1 ---> NGF 10.2478/s11756-018-0099-1  
 Expression: MAPK1 ---> NGF 10.2478/s11756-018-0099-1  
 Expression: MAPK1 ---> NGF 30893117 10.1097/ACO.0000000000000723  
 Expression: MAPK1 ---> NGF 23182412 10.1017/S0007114512004710  
 Expression: MAPK1 ---> NGF 23207416 10.1159/000345043  
 Expression: MAPK1 ---> NGF 25957627 10.1007/s10266-015-0206-510.1007/s10266-015-0  
 Expression: MAPK1 ---> NGF 1246 10.1016/j.apsb.2017.06.006  
 Expression: MAPK1 ---> NGF 10.1097/ACO.0000000000000723  
 positive MolTransport: NGF --> M33910125 10.1016/j.combiomed.2021.104339  
 positive MolTransport: NGF --> M10858459 10.1074/jbc.275.25.19306  
 positive MolTransport: NGF --> M10858459 10.1074/jbc.275.25.19306  
 positive MolTransport: NGF --> M10858459 10.1074/jbc.275.25.19306  
 positive MolTransport: NGF --> M12706116 10.1016/S0014-4827(03)00037-5  
 positive MolTransport: NGF --> M10858459  
 positive MolTransport: NGF --> M10858459  
 positive MolTransport: NGF --> M10858459  
 positive MolTransport: NGF --> M8626780  
 positive MolTransport: NGF --> M16107706  
 positive MolTransport: NGF --> M15121859  
 positive MolTransport: NGF --> M15772344  
 positive MolTransport: NGF --> M27342992 10.1007/s00018-016-2297-8  
 positive MolTransport: NGF --> M22358092  
 positive MolTransport: NGF --> M12615082 10.1016/S0736-5748(02)00139-9  
 positive MolTransport: NGF --> M16306406  
 positive MolTransport: NGF --> M15056710  
 Expression: KDM5B ---> TP53 25877751 10.1007/s13277-015-3418-y10.1007/s13277-015-3  
 Expression: KDM5B ---> TP53 25877751 10.1007/s13277-015-3418-y10.1007/s13277-015-3  
 Expression: KDM5B ---> TP53 31949850  
 Expression: KDM5B ---> TP53 31949850  
 positive Expression: NGF --> AK130578789 10.1016/j.exer.2018.12.005  
 positive Expression: NGF --> AK118660503 10.1074/jbc.M803019200  
 positive Expression: NGF --> AK130928478 10.1016/j.neulet.2019.03.049  
 positive Expression: NGF --> AK127263974 10.1016/j.neuron.2016.05.002  
 positive Expression: NGF --> AK132531260 10.1016/j.bbadis.2020.165858  
 positive Expression: NGF --> AK133985879 10.1016/j.phymed.2021.153576  
 positive Expression: NGF --> AK121036149 10.1016/j.bbrc.2010.10.110  
 positive Expression: NGF --> AK120307615 10.1016/j.neuint.2010.03.005  
 positive Expression: NGF --> AK120138971 10.1016/j.neulet.2010.01.070  
 positive Expression: NGF --> AK115555922 10.1016/j.mcn.2004.07.007  
 positive Expression: NGF --> AKT1 10.1016/j.clim.2009.03.456  
 positive Expression: NGF --> AK118094051  
 positive Expression: NGF --> AK115626752  
 positive Expression: NGF --> AK115626752  
 positive Expression: NGF --> AK121179413  
 positive Expression: NGF --> AK127186265  
 positive Expression: NGF --> AK128005222 10.1007/s11064-016-2134-3  
 positive Expression: NGF --> AK128762104 10.1007/s11064-017-2333-6  
 positive Expression: NGF --> AK128762104 10.1007/s11064-017-2333-6  
 positive Expression: NGF --> AK132362584 10.1124/mol.119.118950

positive Expression: NGF --> AKT23598414 10.1038/cddis.2013.99  
 positive Expression: NGF --> AKT1  
 positive Expression: NGF --> AK121179413 10.1371/journal.pone.0015600  
 positive Expression: NGF --> AK124006492 10.1091/mbc.E12-06-0445  
 positive Expression: NGF --> AK124667984 10.1371/journal.pone.0093223  
 positive Expression: NGF --> AK112065668 10.1046/j.1471-4159.2002.00841.x  
 positive Expression: NGF --> AK117182181 10.1016/j.neulet.2006.11.040  
 positive Expression: NGF --> AK120663926 10.1158/1535-7163.MCT-10-033610.1158/1535-716  
 positive Expression: NGF --> AK130543144 10.1080/09168451.2018.155360710.1080/09168451  
 positive Expression: NGF --> AK130578789 10.1016/j.exer.2018.12.00510.1016/j.exer.2018  
 positive Expression: NGF --> AK132997750 10.1097/ALN.000000000000357610.1097/ALN.00000  
 positive Expression: NGF --> AKT1 10.1016/j.phymed.2021.153576  
 positive Expression: NGF --> AK135109876 10.1186/s12974-022-02405-1  
 Expression: CLDN1 ---> NOTCH1 28316062 10.1007/s11010-017-3000-6  
 Expression: CLDN1 ---> NOTCH1 28316062 10.1007/s11010-017-3000-6  
 Expression: CLDN1 ---> NOTCH1 28316062 10.1007/s11010-017-3000-6  
 Expression: CLDN1 ---> NOTCH1 28316062 10.1007/s11010-017-3000-610.1007/s11010-017-3  
 Expression: CLDN1 ---> NOTCH1 23766441 10.1136/gut.jnl-2012-304241  
 Expression: CLDN1 ---> NOTCH1 28316062 10.1007/s11010-017-3000-6  
 Expression: CLDN1 ---> NOTCH1 28316062 10.1007/s11010-017-3000-6  
 Expression: SPP1 ---> NOTCH1 21747408 10.1038/icb.2011.47  
 Expression: SPP1 ---> NOTCH1 24131213 10.1089/scd.2013.0300  
 Expression: SPP1 ---> NOTCH1 25734817 10.1371/journal.pone.0118201  
 Expression: SPP1 ---> NOTCH1 25734817 10.1371/journal.pone.0118201  
 Expression: SPP1 ---> NOTCH1 29410240 10.1016/j.jprot.2018.01.017  
 Expression: STC2 ---> CLDN1 25830567 10.1371/journal.pone.012217910.1371/journal.p  
 Regulation: NOTCH1 ---> IGFBP4 15262980 10.1074/jbc.M405222200  
 Regulation: NOTCH1 ---> IGFBP4 17314100 10.1074/jbc.M607903200  
 Regulation: NOTCH1 ---> IGFBP4 15262980  
 Regulation: NOTCH1 ---> IGFBP4 31518159 10.1152/ajpheart.00395.2019  
 Regulation: NOTCH1 ---> IGFBP4 23161866 10.1210/en.2012-1552  
 negative Expression: IGFBP4 ---| 28150906 10.1002/cbin.1073210.1002/cbin.10732  
 negative Expression: PRR5L ---| F21964062 10.1016/j.cellsig.2011.09.01510.1016/j.cellsi  
 PromoterBinding: TP53 ---> CLDN1 18648642  
 PromoterBinding: TP53 ---> CLDN1 18648642  
 PromoterBinding: TP53 ---> CLDN1  
 Regulation: B3GNT3 ---> AKT1 31968179 10.1089/dna.2019.5089  
 Regulation: B3GNT3 ---> AKT1 24118321 10.1111/cas.1229410.1111/cas.12294  
 positive PromoterBinding: PPARG -23473036 10.1016/j.cmet.2013.01.016  
 positive PromoterBinding: PPARG -25562426 10.1016/j.cellsig.2014.12.015  
 positive PromoterBinding: PPARG -28711511 10.1016/j.micpath.2017.07.019  
 positive PromoterBinding: PPARG -23589827 10.1152/physrev.00019.2012  
 positive PromoterBinding: PPARG -31185306 10.1016/j.bbalip.2019.06.006  
 positive PromoterBinding: PPARG -18688264  
 positive PromoterBinding: PPARG --> CLDN1  
 Expression: NOTCH1 ---> RBP1 32971095 10.1016/j.exer.2020.108256  
 Expression: NOTCH1 ---> RBP1 20100467 10.1016/j.bbrc.2010.01.084  
 Expression: NOTCH1 ---> RBP1 20100467 10.1016/j.bbrc.2010.01.084  
 Expression: NOTCH1 ---> RBP1 17991461 10.1016/j.ydbio.2007.09.052  
 Expression: NOTCH1 ---> RBP1 18805411 10.1016/j.ydbio.2008.08.034  
 Expression: NOTCH1 ---> RBP1 17681135 10.1016/j.devcel.2007.06.012

Expression: NOTCH1 ---> RBP1 17681135 10.1016/j.devcel.2007.06.012  
 Expression: NOTCH1 ---> RBP1 23293291 10.1242/dev.082842  
 Expression: NOTCH1 ---> RBP1 17681135 10.1016/j.devcel.2007.06.012  
 positive Expression: PTGS2 --> #22826468 10.1124/mol.112.079129  
 positive Expression: PTGS2 --> #26600514 10.4238/2015.November.18.18  
 positive Expression: PTGS2 --> #15517878  
 positive Expression: PTGS2 --> #16170027 10.1158/1535-7163.MCT-05-0139  
 positive Expression: PTGS2 --> #18695918  
 positive Expression: PTGS2 --> #26600514 10.4238/2015.November.18.1810.4238/2015.Nover  
 Regulation: ABCC1 ---> PTGS2 21803151 10.1016/j.cellsig.2011.07.010  
 Regulation: ABCC1 ---> PTGS2 21803151 10.1016/j.cellsig.2011.07.010  
 positive QuantitativeChange: hypc 27584795 10.1038/cddis.2016.262  
 positive QuantitativeChange: hypc 27584795 10.1038/cddis.2016.262  
 Regulation: SPP1 ---> MCL1 30107166 10.1016/j.lfs.2018.08.025  
 Regulation: SPP1 ---> MCL1 24947165 10.1186/1477-7819-12-189  
 Expression: AKT1 ---> NOTCH1 27816488 10.1016/j.canlet.2016.10.039  
 Expression: AKT1 ---> NOTCH1 18440314 10.1016/j.febslet.2008.04.024  
 Expression: AKT1 ---> NOTCH1 18440314 10.1016/j.febslet.2008.04.024  
 Expression: AKT1 ---> NOTCH1 10.1016/j.lfs.2011.10.012  
 Expression: AKT1 ---> NOTCH1 21338656 10.1016/j.bbcan.2011.02.001  
 Expression: AKT1 ---> NOTCH1 21338656 10.1016/j.bbcan.2011.02.001  
 Expression: AKT1 ---> NOTCH1 17920278 10.1016/j.tibs.2007.09.002  
 Expression: AKT1 ---> NOTCH1 22056375 10.1016/j.lfs.2011.10.012  
 Expression: AKT1 ---> NOTCH1 10.1016/j.amjsurg.2015.11.029  
 Expression: AKT1 ---> NOTCH1 26850133 10.1016/j.amjsurg.2015.11.029  
 Expression: AKT1 ---> NOTCH1 18924608  
 Expression: AKT1 ---> NOTCH1 17158336  
 Expression: AKT1 ---> NOTCH1 12482957  
 Expression: AKT1 ---> NOTCH1 10.1172/JCI80396  
 Expression: AKT1 ---> NOTCH1 28629170 10.3390/ijms18061295  
 Expression: AKT1 ---> NOTCH1 22258620 10.1038/emboj.2011.443  
 Expression: AKT1 ---> NOTCH1 22258620 10.1038/emboj.2011.443  
 Expression: AKT1 ---> NOTCH1 24113181 10.1038/cddis.2013.375  
 Expression: AKT1 ---> NOTCH1 21730286 10.1128/MCB.05821-11  
 Expression: AKT1 ---> NOTCH1 24113181 10.1038/cddis.2013.37510.1038/cddis.2013.375  
 Expression: AKT1 ---> NOTCH1 26117016 10.7534/j.issn.1009-2137.2015.03.015  
 Expression: AKT1 ---> NOTCH1 29725418 10.3892/ol.2018.819310.3892/ol.2018.8193  
 Expression: AKT1 ---> NOTCH1 12768030  
 Expression: AKT1 ---> NOTCH1 22258620 10.1038/emboj.2011.443  
 Expression: AKT1 ---> NOTCH1 23802886 10.1111/jgh.12291  
 Expression: AKT1 ---> NOTCH1 24062466 10.1073/pnas.1309276110  
 Expression: AKT1 ---> NOTCH1 26530164 10.3892/ijo.2015.3221  
 Expression: AKT1 ---> NOTCH1  
 Expression: AKT1 ---> NOTCH1 29857516 10.3390/ijms19061631  
 Expression: AKT1 ---> NOTCH1 30478302 10.1038/s41419-018-1185-6  
 Expression: AKT1 ---> NOTCH1 10.1186/s12935-018-0714-9

positive Expression: PPARG --> U18571911 10.1016/j.etp.2008.04.009  
 positive Expression: PPARG --> U18688264  
 positive Expression: PPARG --> U18688264  
 positive Expression: PPARG --> U18688264 10.1038/cdd.2008.11610.1038/cdd.2008.116  
 positive Expression: PPARG --> UPK1A  
 positive Expression: PPARG --> U34697317 10.1038/s41467-021-26421-6  
 negative Expression: NOTCH1 ---| 29496446 10.1016/j.bbrc.2018.02.187  
 negative Expression: NOTCH1 ---| 29496446 10.1016/j.bbrc.2018.02.187  
 negative Expression: NOTCH1 ---| 29496446 10.1016/j.bbrc.2018.02.187  
 negative Expression: NOTCH1 ---| 28302721 10.1074/jbc.M116.759134  
 negative Expression: NOTCH1 ---| 33129879 10.1016/j.lfs.2020.118686  
 negative Expression: NOTCH1 ---| 30394310 10.1016/j.toxlet.2018.10.024  
 negative Expression: NOTCH1 ---| 30394310 10.1016/j.toxlet.2018.10.024  
 negative Expression: NOTCH1 ---| 30394310 10.1016/j.toxlet.2018.10.024  
 negative Expression: NOTCH1 ---| 30119264 10.1016/j.biopha.2018.07.018  
 negative Expression: NOTCH1 ---| 28645565 10.1016/j.cellsig.2017.06.011  
 negative Expression: NOTCH1 ---| 27823652 10.1016/j.critrevonc.2016.08.006  
 negative Expression: NOTCH1 ---| 30738865 10.1016/j.semcancer.2019.02.001  
 negative Expression: NOTCH1 ---| 32871474 10.1016/j.intimp.2020.106911  
 negative Expression: NOTCH1 ---| 32871474 10.1016/j.intimp.2020.106911  
 negative Expression: NOTCH1 ---| 32871474 10.1016/j.intimp.2020.106911  
 negative Expression: NOTCH1 ---| 31523031 10.1016/j.jbior.2019.100649  
 negative Expression: NOTCH1 ---| 21624358 10.1016/j.ydbio.2011.05.659  
 negative Expression: NOTCH1 ---| 18455982 10.1016/j.cell.2008.04.013  
 negative Expression: NOTCH1 ---| 21993533 10.1016/j.urolonc.2011.07.006  
 negative Expression: NOTCH1 ---| 21993533 10.1016/j.urolonc.2011.07.006  
 negative Expression: NOTCH1 ---| 21993533 10.1016/j.urolonc.2011.07.006  
 negative Expression: NOTCH1 ---| 23348702 10.1016/j.canlet.2013.01.020  
 negative Expression: NOTCH1 ---| 24090996 10.1016/j.leukres.2013.09.007  
 negative Expression: NOTCH1 ---| 24780321 10.1016/j.lfs.2014.04.017  
 negative Expression: NOTCH1 ---| 26123366 10.1016/j.exphem.2015.05.017  
 negative Expression: NOTCH1 ---| 26392376 10.1016/j.semcancer.2015.09.009  
 negative Expression: NOTCH1 ---| 20015880  
 negative Expression: NOTCH1 ---| 27070592 10.3390/i.jms17040531  
 negative Expression: NOTCH1 ---| 28627671 10.3892/mmr.2017.6791  
 negative Expression: NOTCH1 ---| 28627671 10.3892/mmr.2017.6791  
 negative Expression: NOTCH1 ---| 28627671 10.3892/mmr.2017.6791  
 negative Expression: NOTCH1 ---| 28951560 10.1038/leu.2017.301  
 negative Expression: NOTCH1 ---| 29532851 10.3892/i.jmm.2018.3548  
 negative Expression: NOTCH1 ---| 29743588 10.1038/s41388-018-0251-y  
 negative Expression: NOTCH1 ---| 29743588 10.1038/s41388-018-0251-y  
 negative Expression: NOTCH1 ---| 29743588 10.1038/s41388-018-0251-y  
 negative Expression: NOTCH1 ---| 29743588 10.1038/s41388-018-0251-y  
 negative Expression: NOTCH1 ---| 29743588 10.1038/s41388-018-0251-y  
 negative Expression: NOTCH1 ---| 29743588 10.1038/s41388-018-0251-y  
 negative Expression: NOTCH1 ---| 29858604 10.1038/s41580-018-0015-0  
 negative Expression: NOTCH1 ---| 30145641 10.1007/s11033-018-4321-6  
 negative Expression: NOTCH1 ---| 30145641 10.1007/s11033-018-4321-6  
 negative Expression: NOTCH1 ---| 31732769 10.1007/s00280-019-03990-4  
 negative Expression: NOTCH1 ---| 32893590 10.19540/j.cnki.cjcm.20200405.403  
 negative Expression: NOTCH1 ---| 33158122 10.3390/i.jms21218255  
 negative Expression: NOTCH1 ---| 33051595 10.1038/s41388-020-01498-3  
 negative Expression: NOTCH1 ---| PTEN 10.20944/preprints201609.0074.v1  
 negative Expression: NOTCH1 ---| 32467322 10.1136/jclinpath-2020-206693

negative Expression: NOTCH1 ---| 22623890 10.1100/2012/252457  
 negative Expression: NOTCH1 ---| 22074495 10.1186/1476-4598-10-138  
 negative Expression: NOTCH1 ---| PTEN  
 negative Expression: NOTCH1 ---| 23634247  
 negative Expression: NOTCH1 ---| 22002304 10.1038/onc.2011.467  
 negative Expression: NOTCH1 ---| 22002304 10.1038/onc.2011.467  
 negative Expression: NOTCH1 ---| 22002304 10.1038/onc.2011.467  
 negative Expression: NOTCH1 ---| 24113181 10.1038/cddis.2013.375  
 negative Expression: NOTCH1 ---| 24113181 10.1038/cddis.2013.375  
 negative Expression: NOTCH1 ---| 24113181 10.1038/cddis.2013.375  
 negative Expression: NOTCH1 ---| 24113181 10.1038/cddis.2013.375  
 negative Expression: NOTCH1 ---| 24113181 10.1038/cddis.2013.375  
 negative Expression: NOTCH1 ---| 24113181 10.1038/cddis.2013.375  
 negative Expression: NOTCH1 ---| 24113181 10.1038/cddis.2013.375  
 negative Expression: NOTCH1 ---| 24113181 10.1038/cddis.2013.375  
 negative Expression: NOTCH1 ---| 24113181 10.1038/cddis.2013.375  
 negative Expression: NOTCH1 ---| 24286423 10.3760/cma.j.issn.0366-6999.20130721  
 negative Expression: NOTCH1 ---| 24905788 10.1146/annurev-biochem-082411-113907  
 negative Expression: NOTCH1 ---| 24988225 10.1371/journal.pone.0101024  
 negative Expression: NOTCH1 ---| 25043004 10.1038/nature13495  
 negative Expression: NOTCH1 ---| 26491213 10.1155/2015/520590  
 negative Expression: NOTCH1 ---| 17245125 10.4161/cc.6.1.3648  
 negative Expression: NOTCH1 ---| 17245125 10.4161/cc.6.1.3648  
 negative Expression: NOTCH1 ---| 17873882 10.1038/nml636  
 negative Expression: NOTCH1 ---| 19479935 10.1002/jcb.2219910.1002/jcb.22199  
 negative Expression: NOTCH1 ---| 19479935 10.1002/jcb.2219910.1002/jcb.22199  
 negative Expression: NOTCH1 ---| 19479935 10.1002/jcb.2219910.1002/jcb.22199  
 negative Expression: NOTCH1 ---| 21993533 10.1016/j.urolonc.2011.07.00610.1016/j.urolonc  
 negative Expression: NOTCH1 ---| 24780321 10.1016/j.lfs.2014.04.01710.1016/j.lfs.2014.0  
 negative Expression: NOTCH1 ---| 25110169 10.3892/ijmm.2014.188910.3892/ijmm.2014.1889  
 negative Expression: NOTCH1 ---| 29496446 10.1016/j.bbrc.2018.02.18710.1016/j.bbrc.2018  
 negative Expression: NOTCH1 ---| PTEN 10.1016/j.semancer.2019.02.001  
 negative Expression: NOTCH1 ---| PTEN 10.1016/j.jbior.2019.100649  
 negative Expression: NOTCH1 ---| PTEN 10.1016/j.urolonc.2011.07.006  
 negative Expression: NOTCH1 ---| PTEN 10.1016/j.urolonc.2011.07.006  
 negative Expression: NOTCH1 ---| PTEN 10.1016/j.urolonc.2011.07.006  
 negative Expression: NOTCH1 ---| PTEN 10.1007/s00280-019-03990-4  
 negative Expression: NOTCH1 ---| 29496446 10.1016/j.bbrc.2018.02.18710.1016/j.bbrc.2018  
 negative Expression: NOTCH1 ---| 28951560 10.1038/leu.2017.301  
 negative Expression: NOTCH1 ---| 21035501 10.1016/j.advenzreg.2010.09.012  
 negative Expression: NOTCH1 ---| 20223597 10.1016/j.ctrv.2010.02.005  
 negative Expression: NOTCH1 ---| 18951834 10.1016/j.drug.2008.09.002  
 negative Expression: NOTCH1 ---| 22897852 10.1016/j.ccr.2012.06.014  
 negative Expression: NOTCH1 ---| 26683354 10.1016/j.cca.2015.12.010  
 negative Expression: NOTCH1 ---| 26505911 10.1016/j.exphem.2015.10.004  
 negative Expression: NOTCH1 ---| 18830414  
 negative Expression: NOTCH1 ---| 18830414  
 negative Expression: NOTCH1 ---| 20015880  
 negative Expression: NOTCH1 ---| 19117948  
 negative Expression: NOTCH1 ---| 19117947  
 negative Expression: NOTCH1 ---| 27138341 10.1371/journal.pone.0154771  
 negative Expression: NOTCH1 ---| PTEN 10.1172/JCI84637  
 negative Expression: NOTCH1 ---| 22074495 10.1186/1476-4598-10-138  
 negative Expression: NOTCH1 ---| 22074495 10.1186/1476-4598-10-138

negative Expression: NOTCH1 ---| 21566651 10.1038/leu.2011.103  
negative Expression: NOTCH1 ---| 21743488 10.1038/onc.2011.279  
negative Expression: NOTCH1 ---| 23950991 10.1371/journal.pone.0070737  
negative Expression: NOTCH1 ---| 23699387 10.1095/biolreprod.113.108100  
negative Expression: NOTCH1 ---| 24415757 10.1074/jbc.M113.519686  
negative Expression: NOTCH1 ---| 25781910 10.1080/15384047.2015.1016662  
negative Expression: NOTCH1 ---| 26228240 10.1038/ncomms8935  
negative Expression: NOTCH1 ---| 26228240 10.1038/ncomms8935  
negative Expression: NOTCH1 ---| 26228240 10.1038/ncomms8935  
negative Expression: NOTCH1 ---| 25781910 10.1080/15384047.2015.1016662  
negative Expression: NOTCH1 ---| PTEN 10.1071/RD14212  
negative Expression: NOTCH1 ---| PTEN 10.1071/RD14212  
negative Expression: NOTCH1 ---| 28437168 10.1080/15384101.2017.1310351  
negative Expression: NOTCH1 ---| 28627671 10.3892/mmr.2017.6791  
negative Expression: NOTCH1 ---| 28603282 10.1038/cmi.2017.30  
negative Expression: NOTCH1 ---| 29286063 10.3892/ijmm.2017.3319  
negative Expression: NOTCH1 ---| 417 10.1016/j.bbamcr.2018.07.006  
negative Expression: NOTCH1 ---| 21212363 10.1073/pnas.1006937108  
negative Expression: NOTCH1 ---| 22258620 10.1038/emboj.2011.443  
negative Expression: NOTCH1 ---| 19479935 10.1002/jcb.22199  
negative Expression: NOTCH1 ---| PTEN  
negative Expression: NOTCH1 ---| PTEN 10.1016/j.lfs.2020.118686  
negative Expression: NOTCH1 ---| 34374886 10.1007/s10911-021-09496-1  
negative Expression: NOTCH1 ---| 36067712 10.1016/j.cyto.2022.156013  
negative Expression: NOTCH1 ---| 36286020 10.3390/cimb44100305  
Binding: TP53 ---- RBP1 23376032 10.1016/j.freeradbiomed.2013.01.026  
Regulation: TP53 ---> RBP1 14585279 10.1016/S1521-6616(03)00208-0  
positive Regulation: GPER1 --> 128595943 10.1016/j.jsbmb.2017.05.005  
positive Regulation: GPER1 --> 126888479 10.1507/endocrj.EJ15-0571  
positive Regulation: GPER1 --> 125275589 10.1038/cddis.2014.398  
positive Regulation: GPER1 --> 125275589 10.1038/cddis.2014.398  
positive Regulation: GPER1 --> 126225773 10.1038/cddis.2015.201  
negative Expression: PTEN ---| CI 32898555 10.1016/j.yexcr.2020.112259  
negative Expression: PTEN ---| CI 32522567 10.1016/j.lfs.2020.117923  
negative Expression: PTEN ---| CI 31931443 10.1016/j.lungcan.2020.01.005  
negative Expression: PTEN ---| CI 29800685 10.1016/j.canlet.2018.05.015  
negative Expression: PTEN ---| CI 32120023 10.1016/j.canlet.2020.02.036  
negative Expression: PTEN ---| CI 29126881 10.1016/j.bbcan.2017.10.007  
negative Expression: PTEN ---| CI 33607461 10.1016/j.ctrv.2021.102157  
negative Expression: PTEN ---| CI 32057515 10.1016/j.prp.2020.152852  
negative Expression: PTEN ---| CI 26967649 10.1016/j.coi.2016.02.001  
negative Expression: PTEN ---| CI 28208102 10.1016/j.coi.2017.01.004  
negative Expression: PTEN ---| CI 30287140 10.1016/j.tibs.2018.09.004  
negative Expression: PTEN ---| CI 33341506 10.1016/j.critrevonc.2020.103185  
negative Expression: PTEN ---| CI 31422157 10.1016/j.semcan.2019.08.015  
negative Expression: PTEN ---| CI 31874279 10.1016/j.semcan.2019.11.011  
negative Expression: PTEN ---| CI 27192563 10.1016/j.immuni.2016.05.002  
negative Expression: PTEN ---| CI 29562194 10.1016/j.immuni.2018.03.014  
negative Expression: PTEN ---| CI 33865701 10.1016/j.semcd.2021.04.001  
negative Expression: PTEN ---| CI 31668929 10.1016/j.molcel.2019.09.030  
negative Expression: PTEN ---| CI 31005030 10.1016/j.drug.2019.04.001  
negative Expression: PTEN ---| CI 28233639 10.1016/j.it.2017.01.002  
negative Expression: PTEN ---| CI 27258185 10.1016/j.intimp.2016.05.016  
negative Expression: PTEN ---| CI 32416456 10.1016/j.intimp.2020.106594





negative Expression: PTEN ---| CD274 10.1152/AJPGI.00197.2019  
 negative Expression: PTEN ---| CD274 10.1152/AJPGI.00197.2019  
 negative Expression: PTEN ---| CD274 10.1152/AJPGI.00197.2019  
 negative Expression: PTEN ---| CI 32225076 10.3390/i.jms21072286  
 negative Expression: PTEN ---| CI 32327707 10.1038/s41416-020-0834-6  
 negative Expression: PTEN ---| CI 31714809 10.5858/arpa.2018-0584-CP  
 negative Expression: PTEN ---| CI 34445735 10.3390/i.jms22169030  
 negative Expression: PTEN ---| CI 34385702 10.1038/s41591-021-01450-2  
 negative Expression: PTEN ---| CI 23785454 10.1371/journal.pone.006582110.1371/journal.p  
 negative Expression: PTEN ---| CI 23785454 10.1371/journal.pone.006582110.1371/journal.p  
 negative Expression: PTEN ---| CI 1170 10.1016/j.it.2017.01.002  
 negative Expression: PTEN ---| CI 741 10.1016/j.tibs.2018.09.004  
 negative Expression: PTEN ---| CD274 10.1016/j.semcan.2019.08.015  
 negative Expression: PTEN ---| CD274 10.1016/j.molcel.2019.09.030  
 negative Expression: PTEN ---| CD274 10.1016/j.prp.2020.152852  
 negative Expression: PTEN ---| CD274 10.1016/j.molmed.2010.09.006  
 negative Expression: PTEN ---| CD274 10.1172/JCI96610  
 negative Expression: PTEN ---| CD274 10.1186/s12943-020-1144-6  
 negative Expression: PTEN ---| CD274 10.1186/s12943-020-1144-6  
 negative Expression: PTEN ---| CI 21899511  
 negative Expression: PTEN ---| CI 23625198 10.1189/jlb.1212621  
 negative Expression: PTEN ---| CI 23785454 10.1371/journal.pone.0065821  
 negative Expression: PTEN ---| CI 23785454 10.1371/journal.pone.0065821  
 negative Expression: PTEN ---| CI 23785454 10.1371/journal.pone.0065821  
 negative Expression: PTEN ---| CI 23785454 10.1371/journal.pone.0065821  
 negative Expression: PTEN ---| CI 23785454 10.1371/journal.pone.0065821  
 negative Expression: PTEN ---| CI 24779345 10.1186/1479-5876-12-107  
 negative Expression: PTEN ---| CI 25342040 10.3779/j.issn.1009-3419.2014.10.05  
 negative Expression: PTEN ---| CI 25844720 10.1371/journal.pone.0123410  
 negative Expression: PTEN ---| CI 26452385  
 negative Expression: PTEN ---| CI 26762740 10.1016/j.jtho.2015.09.010  
 negative Expression: PTEN ---| CI 27276060 10.1371/journal.pone.0157176  
 negative Expression: PTEN ---| CI 24624456  
 negative Expression: PTEN ---| CI 27133741 10.1016/j.lungcan.2016.03.00110.1016/j.lungca  
 negative Expression: PTEN ---| CI 30100056 10.1016/j.bbrc.2018.08.03710.1016/j.bbrc.2018  
 negative Expression: PTEN ---| CI 31604033 10.1152/ajpgi.00197.201910.1152/ajpgi.00197.2  
 negative Expression: PTEN ---| CI 31604033 10.1152/ajpgi.00197.201910.1152/ajpgi.00197.2  
 negative Expression: PTEN ---| CI 31604033 10.1152/ajpgi.00197.201910.1152/ajpgi.00197.2  
 negative Expression: PTEN ---| CD274 10.5858/arpa.2018-0584-CP  
 negative Expression: PTEN ---| CI 32860047 10.1084/JEM.20191115  
 negative Expression: PTEN ---| CI 32860047 10.1084/JEM.20191115  
 negative Expression: PTEN ---| CI 32860047 10.1084/JEM.20191115  
 negative Expression: PTEN ---| CI 32860047 10.1084/JEM.20191115  
 negative Expression: PTEN ---| CI 28714940 10.3390/i.jms18071547  
 negative Expression: PTEN ---| CI 24468585 10.1016/j.humimm.2014.01.006  
 negative Expression: PTEN ---| CD274  
 negative Expression: PTEN ---| CD274 10.1016/j.semcd.2021.04.001  
 negative Expression: PTEN ---| CI 34804985 10.3389/fonc.2021.78172010.3389/fonc.2021.781  
 negative Expression: PTEN ---| CI 34948346 10.3390/i.jms222413550  
 negative Expression: PTEN ---| CI 35034965 10.1038/s41388-021-02144-2  
 negative Expression: PTEN ---| CI 35350588 10.3892/o1.2022.1326910.3892/o1.2022.13269  
 negative Expression: PTEN ---| CI 35350588 10.3892/o1.2022.1326910.3892/o1.2022.13269  
 negative Expression: PTEN ---| CI 32917780 10.2967/jnumed.120.250720  
 negative Expression: PTEN ---| CI 35021970 10.2174/138945012366622011114649

negative Expression: PTEN ---| CI 35236543 10.3727/096504022X16462176651719  
 negative Expression: PTEN ---| CI 35541919 10.7150/ijbs.72534  
 negative Expression: PTEN ---| CI 35783156 10.1155/2022/1531353  
 negative Expression: PTEN ---| CI 35301651 10.1007/s11033-022-07246-y  
 negative Expression: PTEN ---| CI 35301651 10.1007/s11033-022-07246-y  
 negative Expression: PTEN ---| CI 35301651 10.1007/s11033-022-07246-y  
 negative Expression: PTEN ---| CD274 10.1016/j.gendis.2022.07.024  
 negative Expression: PTEN ---| CI 35817840 10.1038/s41388-022-02406-7  
 negative Expression: PTEN ---| CI 35817840 10.1038/s41388-022-02406-7  
 negative Expression: PTEN ---| CI 35817840 10.1038/s41388-022-02406-7  
 negative Expression: PTEN ---| CI 36233088 10.3390/ijms231911789  
 Regulation: CD274 ---> PTEN 27660198 10.1016/j.cellimm.2016.09.009  
 Regulation: CD274 ---> PTEN 32392177 10.1136/esmooopen-2019-000573  
 Regulation: CD274 ---> PTEN 26779629 10.1007/s13277-016-4812-9  
 Regulation: CD274 ---> PTEN 28703774 10.3390/ijms18071517  
 Regulation: CD274 ---> PTEN 28982322 10.2174/1381612823666171004120152  
 Regulation: CD274 ---> PTEN 30506105 10.1007/s10753-018-0939-8  
 Regulation: CD274 ---> PTEN 31792623 10.1007/s00404-019-05401-8  
 Regulation: CD274 ---> PTEN 32522267 10.1186/s12964-020-00599-6  
 Regulation: CD274 ---> PTEN 21899511  
 Regulation: CD274 ---> PTEN 24551119 10.1371/journal.pone.0088557  
 Regulation: CD274 ---> PTEN 35409396 10.3390/ijms23074037  
 Regulation: CD274 ---> PTEN 35301651 10.1007/s11033-022-07246-y  
 positive Expression: NGF --> SPF 12593600 10.1902/jop.2003.74.1.76  
 positive Expression: NGF --> SPF 17720554 10.1016/j.cellbi.2007.06.012  
 positive Expression: NGF --> SPF 17392476  
 positive Expression: NGF --> SPF 18045880  
 positive Expression: NGF --> SPF 15686872 10.1016/j.reprotox.2004.09.004  
 positive Expression: NGF --> SPF 18045880 10.1074/jbc.M704913200  
 positive Expression: NGF --> SPP1  
 positive Expression: NGF --> SPF 35683016 10.3390/ijms23116337  
 positive Regulation: RAC1 --> NF 15684429 10.1074/jbc.M405073200  
 positive Regulation: RAC1 --> NF 22330068 10.1016/j.freeradbiomed.2012.02.004  
 positive Regulation: RAC1 --> NF 15684429  
 positive Regulation: RAC1 --> NF 27910850 10.1038/cr.2016.141  
 positive Regulation: RAC1 --> NF 23792411  
 positive Regulation: RAC1 --> NF 24589508 10.4161/cam.28058  
 positive Regulation: RAC1 --> NF 25486363 10.4161/15384101.2015.945865  
 positive Regulation: RAC1 --> NF 23184663 10.1128/MCB.00980-12  
 positive Regulation: RAC1 --> NF 23184663 10.1128/MCB.00980-12  
 positive Regulation: RAC1 --> NF 23184663 10.1128/MCB.00980-12  
 positive Regulation: RAC1 --> NF 23184663 10.1128/MCB.00980-12

positive Regulation: RAC1 --> NF 23184663 10.1128/MCB.00980-12  
positive Regulation: RAC1 --> NF 23184663 10.1128/MCB.00980-12  
positive Regulation: RAC1 --> NF 23184663 10.1128/MCB.00980-12  
positive Regulation: RAC1 --> NF 23184663 10.1128/MCB.00980-12  
positive Regulation: RAC1 --> NF 23184663 10.1128/MCB.00980-12  
positive Regulation: RAC1 --> NF 23184663 10.1128/MCB.00980-12  
positive Regulation: RAC1 --> NF 23184663 10.1128/MCB.00980-12  
positive Regulation: RAC1 --> NF 23184663 10.1128/MCB.00980-12  
positive Regulation: RAC1 --> NF 23184663 10.1128/MCB.00980-12  
positive Regulation: RAC1 --> NF 23184663 10.1128/MCB.00980-12  
positive Regulation: RAC1 --> NF 23184663 10.1128/MCB.00980-12  
positive Regulation: RAC1 --> NF 23184663 10.1128/MCB.00980-12  
positive Regulation: RAC1 --> NF 23184663 10.1128/MCB.00980-12  
positive Regulation: RAC1 --> NF 25588829 10.1242/jcs.158121  
positive Regulation: RAC1 --> NF 25588829 10.1242/jcs.158121  
positive Regulation: RAC1 --> NF 25588829 10.1242/jcs.158121  
positive Regulation: RAC1 --> NF 23184663 10.1128/MCB.00980-1210.1128/MCB.00980-12  
positive Regulation: RAC1 --> NF 23184663 10.1128/MCB.00980-1210.1128/MCB.00980-12  
positive Regulation: RAC1 --> NF 23792411 10.4161/cam.2527610.4161/cam.25276  
positive Regulation: RAC1 --> NF 23792411 10.4161/cam.2527610.4161/cam.25276  
positive Expression: NGF --> PRF 17428473 10.1016/j.yexpr.2007.02.014  
positive Expression: NGF --> PRF 11113316 10.1016/S0306-4522(00)00423-1  
positive Expression: NGF --> PRF 11113316 10.1016/S0306-4522(00)00423-1  
positive Expression: NGF --> PRF 16418002 10.1016/j.conb.2006.01.002  
positive Expression: NGF --> PRF 14595112  
positive Expression: NGF --> PRF 8798778  
positive Expression: NGF --> PRF 7896848  
positive Expression: NGF --> PRF 15673657  
positive Expression: NGF --> PRF 23695304 10.3892/ijmm.2013.1387  
positive Expression: NGF --> PRF 1588954 10.1128/mcb.12.6.2501  
positive Expression: NGF --> PRF 7510697  
positive Expression: NGF --> PRF 7510697  
positive Expression: NGF --> PRF 7896848 10.1074/jbc.270.12.6975  
positive Expression: NGF --> PRF 8798778 10.1074/jbc.271.40.24976  
positive Expression: NGF --> PRF 11573983 10.1006/exnr.2001.7744  
negative Regulation: CD274 ---| #919 10.1016/j.it.2016.11.005  
negative Regulation: CD274 ---| #445 10.1016/j.maturitas.2017.04.014  
negative Regulation: CD274 ---| #26321679 10.1016/j.cell.2015.08.016  
negative Regulation: CD274 ---| #28703774 10.3390/ijms18071517  
negative Regulation: CD274 ---| #28692048 10.1038/onc.2017.209  
negative Regulation: CD274 ---| #28692048 10.1038/onc.2017.209  
negative Regulation: CD274 ---| #28692048 10.1038/onc.2017.209  
negative Regulation: CD274 ---| #28982322 10.2174/1381612823666171004120152  
negative Regulation: CD274 ---| #30078052 10.1007/s00262-018-2221-1  
negative Regulation: CD274 ---| #30808044 10.1055/s-0039-1679909  
negative Regulation: CD274 ---| #21899511  
negative Regulation: CD274 ---| #22337882 10.1074/jbc.M111.283705  
negative Regulation: CD274 ---| #23267208 10.2332/allergolint.12-0A-0450  
negative Regulation: CD274 ---| AKT1 10.1097/SHK.0000000000000247  
negative Regulation: CD274 ---| #25609381 10.1038/ncomms6997  
negative Regulation: CD274 ---| #26927206 10.1146/annurev-immunol-032414-112049  
negative Regulation: CD274 ---| #27671847 10.1002/stem.250910.1002/stem.2509  
negative Regulation: CD274 ---| #29245948 10.18632/oncotarget.2191410.18632/oncotarget.  
negative Regulation: CD274 ---| #20008522

negative Regulation: CD274 ---| #28692048 10.1038/onc.2017.209  
 negative Regulation: CD274 ---| #18941206  
 negative Regulation: CD274 ---| #27798164 10.4049/jimmunol.1601083  
 negative Regulation: CD274 ---| AKT1 10.1016/j.humimm.2011.12.011  
 negative Regulation: CD274 ---| #28887097 10.1016/j.urolonc.2017.08.010  
 negative Regulation: CD274 ---| #29706653 10.1038/s41388-018-0252-x  
 negative Regulation: CD274 ---| AKT1  
 negative Regulation: CD274 ---| AKT1 10.1016/j.semcancer.2019.08.015  
 negative Regulation: CD274 ---| AKT1 10.1016/j.cellimm.2019.103957  
 negative Regulation: CD274 ---| #31850228 10.3389/fonc.2019.0134710.3389/fonc.2019.0134  
 negative Regulation: CD274 ---| AKT1 10.3892/or.2020.7477  
 negative Regulation: CD274 ---| AKT1 10.3892/or.2020.7477  
 negative Regulation: CD274 ---| #30368626 10.1007/s10637-018-0678-6  
 negative Regulation: CD274 ---| #32161124 10.1073/pnas.1921445117  
 negative Regulation: CD274 ---| #32161124 10.1073/pnas.1921445117  
 negative Regulation: CD274 ---| #32161124 10.1073/pnas.1921445117  
 negative Regulation: CD274 ---| #32161124 10.1073/pnas.1921445117  
 negative Regulation: CD274 ---| #32277292 10.1007/s12032-020-01372-y10.1007/s12032-020-  
 negative Regulation: CD274 ---| AKT1 10.1038/s41416-019-0697-x  
 negative Regulation: CD274 ---| #32868929 10.1038/s41590-020-0769-3  
 negative Expression: BECN1 ---| F24905997 10.4161/auto.28771  
 negative Expression: BECN1 ---| PTGS2  
 positive Expression: NOTCH1 ---> 21156799 10.1074/jbc.M110.192393  
 positive Expression: NOTCH1 ---> 21156799 10.1074/jbc.M110.192393  
 positive Expression: NOTCH1 ---> 20381235 10.1016/j.canlet.2010.03.015  
 positive Expression: NOTCH1 ---> 23735298 10.1016/j.scr.2013.04.009  
 positive Expression: NOTCH1 ---> 19228814  
 positive Expression: NOTCH1 ---> 19228814  
 positive Expression: NOTCH1 ---> 19228814  
 positive Expression: NOTCH1 ---> 19710690  
 positive Expression: NOTCH1 ---> 19290049  
 positive Expression: NOTCH1 ---> 28586004 10.3892/ijmm.2017.3011  
 positive Expression: NOTCH1 ---> 29781036 10.3892/or.2018.6447  
 positive Expression: NOTCH1 ---> 29781036 10.3892/or.2018.6447  
 positive Expression: NOTCH1 ---> 29781036 10.3892/or.2018.6447  
 positive Expression: NOTCH1 ---> 21156799 10.1074/jbc.M110.192393  
 positive Expression: NOTCH1 ---> 23468978 10.1371/journal.pone.0057382  
 positive Expression: NOTCH1 ---> 23468978 10.1371/journal.pone.0057382  
 positive Expression: NOTCH1 ---> 23468978 10.1371/journal.pone.0057382  
 positive Expression: NOTCH1 ---> 26648421 10.3892/ijo.2015.3280  
 positive Expression: NOTCH1 ---> 19290049 10.1371/journal.pone.000491110.1371/journal.p  
 positive Expression: NOTCH1 ---> 23053901 10.1007/s10620-012-2434-710.1007/s10620-012-2  
 positive Expression: NOTCH1 ---> 30794693 10.1371/journal.pone.021274910.1371/journal.p  
 positive Expression: NOTCH1 ---> 31948324 10.1080/15384101.2020.171157810.1080/15384101  
 positive Expression: NOTCH1 ---> 20488613 10.1016/j.canlet.2010.04.025  
 positive Expression: NOTCH1 ---> 24875648 10.1016/j.biocel.2014.05.021  
 positive Expression: NOTCH1 ---> 19290049

positive Expression: NOTCH1 --> 19290049  
 positive Expression: NOTCH1 --> 19228814  
 positive Expression: NOTCH1 --> 19290049  
 positive Expression: NOTCH1 --> 19290049 10.1371/journal.pone.0004911  
 positive Expression: NOTCH1 --> 19228814 10.1189/jlb.0908561  
 positive Expression: NOTCH1 --> PTGS2  
 positive Expression: PTEN --> SF19549529 10.1053/j.gastro.2009.06.039  
 positive Expression: PTEN --> SF24893171 10.1371/journal.pone.0097544  
 positive Expression: PTEN --> SF15705860  
 positive Expression: PTEN --> SF15705860  
 positive Expression: PTEN --> SF12460992  
 positive Expression: PTEN --> SF10970827  
 positive Expression: PTEN --> SF25754821 10.1016/j.neuron.2015.02.017  
 positive Expression: PTEN --> SF28505114 10.3390/ijms18051058  
 positive Expression: NOTCH1 --> 23468978 10.1371/journal.pone.0057382  
 positive Expression: NOTCH1 --> 26398771 10.3892/or.2015.4274  
 positive Expression: NOTCH1 --> 26398771 10.3892/or.2015.427410.3892/or.2015.4274  
 positive Expression: NOTCH1 --> 32792479 10.1038/s41419-020-02873-4  
 positive Expression: NOTCH1 --> 32792479 10.1038/s41419-020-02873-4  
 positive Expression: NOTCH1 --> 24472723 10.1124/jpet.113.20756310.1124/jpet.113.20756  
 positive Expression: NOTCH1 --> 23533157 10.1002/stem.137310.1002/stem.1373  
 positive Expression: NOTCH1 --> MAPK1 10.1074/jbc.M116.720698  
 positive Expression: NOTCH1 --> MAPK1 10.1074/jbc.M116.720698  
 positive Expression: NOTCH1 --> 24472723 10.1124/jpet.113.207563  
 positive Regulation: IGFBP4 --> 28179206 10.1016/j.neulet.2017.01.066  
 positive Regulation: IGFBP4 --> 35688891 10.1038/s41431-022-01129-3  
 positive Regulation: IGFBP4 --> 23499909 10.1016/j.cellsig.2013.02.018  
 positive Regulation: IGFBP4 --> 23499909 10.1016/j.cellsig.2013.02.018  
 positive Regulation: IGFBP4 --> 23639626 10.1016/j.tox.2013.04.014  
 positive Regulation: IGFBP4 --> 15572521  
 positive Regulation: IGFBP4 --> 23499909 10.1016/j.cellsig.2013.02.01810.1016/j.cellsi  
 positive Regulation: IGFBP4 --> 23971193 10.2478/pjvs-2013-0036  
 positive Regulation: IGFBP4 --> 29992318 10.1093/nar/gky58910.1093/nar/gky589  
 positive Regulation: IGFBP4 --> AKT1 10.2174/1381612828666220608122934  
 positive Regulation: IGFBP4 --> AKT1 10.2174/1381612828666220608122934  
 positive Regulation: IGFBP4 --> 35688891 10.1038/s41431-022-01129-3  
 positive Regulation: IGFBP4 --> 35688891 10.1038/s41431-022-01129-3  
 positive Regulation: IGFBP4 --> 35688891 10.1038/s41431-022-01129-3  
 positive Expression: NGF --> TP5 10978315 10.1074/jbc.M003146200  
 positive Expression: NGF --> TP5 18036557 10.1016/j.bbrc.2007.11.051  
 positive Expression: NGF --> TP5 10707967 10.1016/S0896-6273(00)80866-1  
 positive Expression: NGF --> TP5 21406225 10.1016/j.cellsig.2011.03.009  
 positive Expression: NGF --> TP5 21406225 10.1016/j.cellsig.2011.03.009  
 positive Expression: NGF --> TP5 23036615 10.1016/j.neuro.2012.09.011  
 positive Expression: NGF --> TP5 10978315  
 positive Expression: NGF --> TP5 9295352  
 positive Expression: NGF --> TP53 10.1007/s11055-016-0342-6  
 positive Expression: NGF --> TP5 18177422 10.1111/j.1432-0436.2007.00261.x10.1111/j.143  
 positive Expression: NGF --> TP5 9852160  
 positive Expression: NGF --> TP5 23778138 10.1172/JCI65988  
 positive Expression: NGF --> TP5 12679365  
 positive Expression: NGF --> TP53  
 positive Expression: NGF --> TP5 35916975 10.1007/s12035-022-02966-5  
 negative Expression: CYP2J2 ---| 22028915 10.1371/journal.pone.0026591



negative Regulation: TP53 ---| Af 15001356 10.1016/j.jmb.2003.10.081  
 negative Regulation: TP53 ---| Af 19203586 10.1016/j.cell.2008.12.002  
 negative Regulation: TP53 ---| Af 19203586 10.1016/j.cell.2008.12.002  
 negative Regulation: TP53 ---| Af 19203586 10.1016/j.cell.2008.12.002  
 negative Regulation: TP53 ---| Af 21377268 10.1016/j.canlet.2011.02.008  
 negative Regulation: TP53 ---| Af 20951769 10.1016/j.bbcan.2010.10.003  
 negative Regulation: TP53 ---| Af 21632182 10.1016/j.mehy.2011.05.006  
 negative Regulation: TP53 ---| Af 15475174 10.1016/j.toxlet.2004.06.013  
 negative Regulation: TP53 ---| Af 18448277 10.1016/j.toxlet.2008.03.012  
 negative Regulation: TP53 ---| Af 19840842 10.1016/j.exger.2009.10.009  
 negative Regulation: TP53 ---| Af 19840842 10.1016/j.exger.2009.10.009  
 negative Regulation: TP53 ---| Af 18534819 10.1016/j.cellsig.2008.04.011  
 negative Regulation: TP53 ---| Af 14624950 10.1016/S0899-9007(03)00174-6  
 negative Regulation: TP53 ---| AKT1 10.1016/j.ejca.2005.02.011  
 negative Regulation: TP53 ---| AKT1 10.1016/j.ejca.2005.02.011  
 negative Regulation: TP53 ---| AKT1 10.1016/j.ejca.2005.02.011  
 negative Regulation: TP53 ---| Af 16084079 10.1016/j.ejca.2005.03.033  
 negative Regulation: TP53 ---| AKT1 10.1016/j.tibs.2011.10.002  
 negative Regulation: TP53 ---| AKT1 10.1016/j.semcd.2004.01.002  
 negative Regulation: TP53 ---| Af 11545734 10.1016/S1097-2765(01)00323-9  
 negative Regulation: TP53 ---| Af 12742394 10.1016/S1350-9462(03)00035-1  
 negative Regulation: TP53 ---| Af 19520599 10.1016/j.cytogfr.2009.05.007  
 negative Regulation: TP53 ---| Af 19648052 10.1016/j.drug.2009.07.001  
 negative Regulation: TP53 ---| Af 19411072 10.1016/j.ccr.2009.03.021  
 negative Regulation: TP53 ---| Af 19796712 10.1016/j.mito.2009.09.006  
 negative Regulation: TP53 ---| Af 22999923 10.1016/j.neulet.2012.09.022  
 negative Regulation: TP53 ---| Af 22975375 10.1016/j.ccr.2012.08.001  
 negative Regulation: TP53 ---| Af 23870914 10.1016/j.foodchem.2013.05.021  
 negative Regulation: TP53 ---| Af 24113167 10.1016/j.bbapap.2013.09.019  
 negative Regulation: TP53 ---| Af 24060999 10.1016/j.jprot.2013.09.009  
 negative Regulation: TP53 ---| Af 24333688 10.1016/j.pharmthera.2013.12.005  
 negative Regulation: TP53 ---| Af 24374014 10.1016/j.canlet.2013.12.025  
 negative Regulation: TP53 ---| Af 24355212 10.1016/j.freeradbiomed.2013.12.010  
 negative Regulation: TP53 ---| AKT1 10.1016/j.bbamem.2014.10.036  
 negative Regulation: TP53 ---| AKT1 10.1016/j.bbrc.2014.11.018  
 negative Regulation: TP53 ---| Af 25016051 10.1016/j.ygcen.2014.06.029  
 negative Regulation: TP53 ---| Af 24915467 10.1016/j.mad.2014.06.002  
 negative Regulation: TP53 ---| Af 24857662 10.1016/j.celrep.2014.04.046  
 negative Regulation: TP53 ---| Af 25907832 10.1016/j.ajpath.2015.01.025  
 negative Regulation: TP53 ---| Af 25446094 10.1016/j.bbrc.2014.11.018  
 negative Regulation: TP53 ---| Af 26022125 10.1016/j.bbrc.2015.05.069  
 negative Regulation: TP53 ---| Af 20858413 10.1016/j.bpj.2010.07.042  
 negative Regulation: TP53 ---| Af 20858413 10.1016/j.bpj.2010.07.042  
 negative Regulation: TP53 ---| Af 25939952 10.1016/j.toxlet.2015.04.015  
 negative Regulation: TP53 ---| Af 26066464 10.1016/j.meegid.2015.06.008  
 negative Regulation: TP53 ---| Af 25450343 10.1016/j.bbamem.2014.10.036  
 negative Regulation: TP53 ---| Af 26718407 10.1016/j.bbrc.2015.12.070  
 negative Regulation: TP53 ---| Af 26875545 10.1016/j.plipres.2016.02.001  
 negative Regulation: TP53 ---| Af 20124728  
 negative Regulation: TP53 ---| Af 15472230  
 negative Regulation: TP53 ---| Af 12639981  
 negative Regulation: TP53 ---| Af 21138557  
 negative Regulation: TP53 ---| Af 18441250  
 negative Regulation: TP53 ---| Af 12529380







negative Regulation: TP53 ---| Af 34907345 10.1038/s41388-021-02147-z  
negative Regulation: TP53 ---| Af 34907345 10.1038/s41388-021-02147-z  
negative Regulation: TP53 ---| Af 33587002 10.1080/01635581.2021.1882509  
negative Regulation: TP53 ---| Af 26790143 10.1016/j.ejca.2015.12.002  
negative Regulation: TP53 ---| Af 30827507 10.1016/j.bbrc.2019.02.089  
negative Regulation: TP53 ---| Af 31733192 10.1016/j.bcp.2019.113713  
negative Regulation: TP53 ---| Af 12393587 10.1182/blood-2002-02-0504  
negative Regulation: TP53 ---| Af 32687844 10.1016/j.cbi.2020.109196  
negative Regulation: TP53 ---| Af 31870856 10.1016/j.yexmp.2019.104362  
negative Regulation: TP53 ---| Af 30528266 10.1016/j.yexcr.2018.12.002  
negative Regulation: TP53 ---| Af 30528266 10.1016/j.yexcr.2018.12.002  
negative Regulation: TP53 ---| Af 30528266 10.1016/j.yexcr.2018.12.002  
negative Regulation: TP53 ---| Af 30528266 10.1016/j.yexcr.2018.12.002  
negative Regulation: TP53 ---| Af 30528266 10.1016/j.yexcr.2018.12.002  
negative Regulation: TP53 ---| Af 20685653 10.1074/jbc.M110.134650  
negative Regulation: TP53 ---| Af 20685653 10.1074/jbc.M110.134650  
negative Regulation: TP53 ---| Af 29358327 10.1074/jbc.M117.791145  
negative Regulation: TP53 ---| Af 24451373 10.1074/jbc.M113.532523  
negative Regulation: TP53 ---| Af 24451373 10.1074/jbc.M113.532523  
negative Regulation: TP53 ---| Af 24451373 10.1074/jbc.M113.532523  
negative Regulation: TP53 ---| Af 24451373 10.1074/jbc.M113.532523  
negative Regulation: TP53 ---| Af 19339243 10.1074/jbc.M809757200  
negative Regulation: TP53 ---| Af 30473026 10.1016/j.lfs.2018.10.051  
negative Regulation: TP53 ---| Af 33333052 10.1016/j.lfs.2020.118814  
negative Regulation: TP53 ---| Af 32693135 10.1016/j.ijbiomac.2020.07.137  
negative Regulation: TP53 ---| Af 30170033 10.1016/j.dci.2018.08.017  
negative Regulation: TP53 ---| Af 30296496 10.1016/j.bbamcr.2018.10.005  
negative Regulation: TP53 ---| Af 27600832 10.1016/j.bbcan.2016.09.001  
negative Regulation: TP53 ---| Af 31320250 10.1016/j.prp.2019.152531  
negative Regulation: TP53 ---| Af 33711551 10.1016/j.biopha.2021.111445  
negative Regulation: TP53 ---| Af 31953216 10.1016/j.bbadis.2020.165684  
negative Regulation: TP53 ---| Af 28673691 10.1016/j.mod.2017.06.006  
negative Regulation: TP53 ---| Af 33773191 10.1016/j.phymed.2021.153534  
negative Regulation: TP53 ---| Af 31843464 10.1016/j.bmc.2019.115235  
negative Regulation: TP53 ---| Af 32652464 10.1016/j.jphotobiol.2020.111951  
negative Regulation: TP53 ---| Af 30641278 10.1016/j.phrs.2019.01.021  
negative Regulation: TP53 ---| Af 30641278 10.1016/j.phrs.2019.01.021  
negative Regulation: TP53 ---| Af 33540047 10.1016/j.phrs.2021.105428  
negative Regulation: TP53 ---| Af 30389549 10.1016/j.biocel.2018.10.008  
negative Regulation: TP53 ---| Af 31846838 10.1016/j.drup.2019.100670  
negative Regulation: TP53 ---| Af 32846356 10.1016/j.dnarep.2020.102952  
negative Regulation: TP53 ---| Af 33717651 10.1016/j.omtn.2021.02.005  
negative Regulation: TP53 ---| Af 24857662 10.1016/j.celrep.2014.04.046  
negative Regulation: TP53 ---| Af 32670818 10.1016/j.jtcme.2020.02.003  
negative Regulation: TP53 ---| Af 15862750 10.1016/j.ejca.2005.02.011  
negative Regulation: TP53 ---| Af 15862750 10.1016/j.ejca.2005.02.011  
negative Regulation: TP53 ---| Af 15862750 10.1016/j.ejca.2005.02.011  
negative Regulation: TP53 ---| Af 22079189 10.1016/j.tibs.2011.10.002  
negative Regulation: TP53 ---| Af 15209377 10.1016/j.semcd.2004.01.002  
negative Regulation: TP53 ---| Af 21999842 10.1186/1476-4598-10-12910.1186/1476-4598-10-  
negative Regulation: TP53 ---| Af 24451373 10.1074/jbc.M113.53252310.1074/jbc.M113.53252  
negative Regulation: TP53 ---| Af 24469034 10.1038/onc.2013.58510.1038/onc.2013.585  
negative Regulation: TP53 ---| Af 24488098 10.1038/cdd.2014.210.1038/cdd.2014.2  
negative Regulation: TP53 ---| Af 24613379 10.1016/j.freeradbiomed.2014.02.02310.1016/j.

|                               |             |                                               |
|-------------------------------|-------------|-----------------------------------------------|
| negative Regulation: TP53 --- | AF 25268131 | 10.1371/journal.pone.010681210.1371/journal.p |
| negative Regulation: TP53 --- | AF 35414774 | 10.7150/ijbs.6720010.7150/ijbs.67200          |
| negative Regulation: TP53 --- | AF 34698964 | 10.1007/s10637-021-01196-1                    |
| negative Regulation: TP53 --- | AF 35414774 | 10.7150/ijbs.67200                            |
| negative Regulation: TP53 --- | AF 35414774 | 10.7150/ijbs.67200                            |
| negative Regulation: TP53 --- | AF 35414774 | 10.7150/ijbs.67200                            |
| negative Regulation: TP53 --- | AF 35414774 | 10.7150/ijbs.67200                            |
| negative Regulation: TP53 --- | AF 35146629 | 10.1007/s10911-022-09511-z                    |
| negative Regulation: TP53 --- | AF 35798843 | 10.1038/s41556-022-00949-1                    |
| negative Regulation: TP53 --- | AF 35715817 | 10.1186/s12964-022-00897-1                    |
| negative Regulation: TP53 --- | AF 35682646 | 10.3390/ijms23115967                          |
| negative Regulation: TP53 --- | AF 35879280 | 10.1038/s41419-022-05106-y                    |
| negative Regulation: TP53 --- | AF 36142874 | 10.3390/ijms231810965                         |
| negative Regulation: TP53 --- | AF 36448674 | 10.1177/15347354221132848                     |
| Expression: MAPK1 ----> CLDN1 | 32553076    | 10.3967/bes2020.04410.3967/bes2020.044        |
| Expression: MAPK1 ----> CLDN1 | 30625382    | 10.1016/j.bbadis.2019.01.008                  |
| Expression: MAPK1 ----> CLDN1 | 35408826    | 10.3390/ijms23073467                          |
| Expression: MAPK1 ----> CLDN1 |             | 10.1016/S0002-9440(10)61243-6                 |
| Expression: MAPK1 ----> CLDN1 | 27524860    | 10.1155/2016/1927348                          |
| Expression: MAPK1 ----> CLDN1 | 18204077    | 10.1093/carcin/bgn00310.1093/carcin/bgn003    |
| Expression: MAPK1 ----> CLDN1 | 30362534    | 10.1002/jcp.2747710.1002/jcp.27477            |
| Expression: MAPK1 ----> CLDN1 | 30658316    | 10.1016/j.tranon.2018.12.011                  |
| Expression: MAPK1 ----> CLDN1 | 30227306    | 10.1016/j.neo.2018.08.010                     |
| Expression: MAPK1 ----> CLDN1 | 35770317    | 10.1111/exd.14637                             |
| Binding: BECN1 ---- MCL1      | 29555460    | 10.1016/j.actbio.2018.03.022                  |
| Binding: BECN1 ---- MCL1      |             | 10.1016/j.canlet.2019.10.030                  |
| Binding: BECN1 ---- MCL1      | 18589438    | 10.1016/j.jmb.2008.05.071                     |
| Binding: BECN1 ---- MCL1      | 21993018    | 10.1016/j.canlet.2011.09.020                  |
| Binding: BECN1 ---- MCL1      |             | 10.1016/j.jdermsci.2011.11.001                |
| Binding: BECN1 ---- MCL1      | 20159550    | 10.1016/j.molcel.2010.01.025                  |
| Binding: BECN1 ---- MCL1      | 21353614    | 10.1016/j.molcel.2011.02.009                  |
| Binding: BECN1 ---- MCL1      | 21353614    | 10.1016/j.molcel.2011.02.009                  |
| Binding: BECN1 ---- MCL1      | 22735572    | 10.1016/j.mito.2012.06.003                    |
| Binding: BECN1 ---- MCL1      | 24012660    | 10.1016/j.semcancer.2013.08.008               |
| Binding: BECN1 ---- MCL1      | 25194337    | 10.1016/j.biocel.2014.08.022                  |
| Binding: BECN1 ---- MCL1      | 25194337    | 10.1016/j.biocel.2014.08.022                  |
| Binding: BECN1 ---- MCL1      | 26009469    | 10.1016/j.jmb.2015.05.015                     |
| Binding: BECN1 ---- MCL1      | 20200450    |                                               |
| Binding: BECN1 ---- MCL1      | 19912650    |                                               |
| Binding: BECN1 ---- MCL1      | 27527160    | 10.3390/ijms17081274                          |
| Binding: BECN1 ---- MCL1      | 28234359    | 10.1038/cdd.2017.22                           |
| Binding: BECN1 ---- MCL1      | 29333953    | 10.1080/15384047.2018.1423927                 |
| Binding: BECN1 ---- MCL1      |             | 10.1530/REP-18-0002                           |
| Binding: BECN1 ---- MCL1      | 28622296    | 10.1038/cdd.2017.82                           |
| Binding: BECN1 ---- MCL1      | 30327467    | 10.1038/s41467-018-06836-4                    |
| Binding: BECN1 ---- MCL1      | 29808796    | 10.14715/cmb/2018.64.6.5                      |
| Binding: BECN1 ---- MCL1      | 29611474    | 10.2174/0929867325666180403145137             |
| Binding: BECN1 ---- MCL1      | 22263800    |                                               |
| Binding: BECN1 ---- MCL1      | 23152582    | 10.1194/jlr.R031278                           |
| Binding: BECN1 ---- MCL1      | 22638980    | 10.1007/s10495-012-0738-x                     |
| Binding: BECN1 ---- MCL1      | 23688351    | 10.1186/1471-2202-14-56                       |
| Binding: BECN1 ---- MCL1      | 23688351    | 10.1186/1471-2202-14-56                       |
| Binding: BECN1 ---- MCL1      | 22614243    | 10.1038/leu.2012.136                          |
| Binding: BECN1 ---- MCL1      | 21139567    | 10.1038/emboj.2010.327                        |

Binding: BECN1 ---- MCL1 21139567 10.1038/emboj.2010.327  
Binding: BECN1 ---- MCL1 21364679 10.1038/cddis.2010.53  
Binding: BECN1 ---- MCL1 23681223 10.1038/cddis.2013.155  
Binding: BECN1 ---- MCL1 23607597 10.2174/15680096113139990039  
Binding: BECN1 ---- MCL1 24107625 10.4161/cc.26696  
Binding: BECN1 ---- MCL1 24113155 10.4161/auto.26452  
Binding: BECN1 ---- MCL1 24912196 10.1073/pnas.1406425111  
Binding: BECN1 ---- MCL1 25885284 10.1186/s12885-015-1239-4  
Binding: BECN1 ---- MCL1 26018731 10.1080/15548627.2015.1049800  
Binding: BECN1 ---- MCL1 25837021 10.1080/15548627.2015.1029836  
Binding: BECN1 ---- MCL1 17643073 10.4161/auto.4713  
Binding: BECN1 ---- MCL1 33497829 10.1016/j.drudis.2021.01.021  
positive Expression: SFRP1 --> F20851881 10.1074/jbc.M110.166231  
positive Expression: SFRP1 --> F20851881 10.1074/jbc.M110.166231  
positive Expression: SFRP1 --> PPARG  
positive Regulation: NOTCH1 --> 62 10.1016/j.biopsych.2016.12.021  
positive Regulation: NOTCH1 --> AKT1 10.1053/j.semmp.2020.09.010  
positive Regulation: NOTCH1 --> AKT1 10.1016/j.yjmcc.2012.03.007  
positive Regulation: NOTCH1 --> AKT1 10.1016/j.lfs.2011.10.012  
positive Regulation: NOTCH1 --> 21193018 10.1016/j.bbcan.2010.12.002  
positive Regulation: NOTCH1 --> 22293023 10.1016/j.tcm.2011.11.006  
positive Regulation: NOTCH1 --> AKT1 10.1016/j.urolonc.2011.07.006  
positive Regulation: NOTCH1 --> AKT1 10.1016/j.urolonc.2011.07.006  
positive Regulation: NOTCH1 --> 20675210 10.1016/j.scr.2010.06.002  
positive Regulation: NOTCH1 --> 22465038 10.1016/j.yjmcc.2012.03.007  
positive Regulation: NOTCH1 --> 24095799 10.1016/j.yexpr.2013.09.019  
positive Regulation: NOTCH1 --> 24095799 10.1016/j.yexpr.2013.09.019  
positive Regulation: NOTCH1 --> 24140475 10.1016/j.cellsig.2013.09.021  
positive Regulation: NOTCH1 --> 21993533 10.1016/j.urolonc.2011.07.006  
positive Regulation: NOTCH1 --> 21993533 10.1016/j.urolonc.2011.07.006  
positive Regulation: NOTCH1 --> 24529510 10.1016/j.jcpa.2013.11.213  
positive Regulation: NOTCH1 --> 25109840 10.1016/j.abb.2014.07.023  
positive Regulation: NOTCH1 --> 22056375 10.1016/j.lfs.2011.10.012  
positive Regulation: NOTCH1 --> 24775271 10.1016/j.imbio.2014.03.020  
positive Regulation: NOTCH1 --> 24775271 10.1016/j.imbio.2014.03.020  
positive Regulation: NOTCH1 --> 24939178 10.1016/j.ejcb.2014.05.004  
positive Regulation: NOTCH1 --> 25799457 10.1016/j.tips.2015.02.002  
positive Regulation: NOTCH1 --> AKT1 10.1016/j.amjsurg.2015.11.029  
positive Regulation: NOTCH1 --> 26850133 10.1016/j.amjsurg.2015.11.029  
positive Regulation: NOTCH1 --> 26967479 10.1016/j.jid.2015.11.006

positive Regulation: NOTCH1 --> 18924608  
positive Regulation: NOTCH1 --> 18830414  
positive Regulation: NOTCH1 --> 20030805  
positive Regulation: NOTCH1 --> 14583609  
positive Regulation: NOTCH1 --> 14583609  
positive Regulation: NOTCH1 --> 20616044  
positive Regulation: NOTCH1 --> 20616044  
positive Regulation: NOTCH1 --> 18369158  
positive Regulation: NOTCH1 --> 19838160  
positive Regulation: NOTCH1 --> 19265851  
positive Regulation: NOTCH1 --> 15650752  
positive Regulation: NOTCH1 --> 27573203 10.3892/i.jo.2016.3598  
positive Regulation: NOTCH1 --> 26846632 10.1007/s13365-015-0394-3  
positive Regulation: NOTCH1 --> 27548161 10.3390/i.jms17081357  
positive Regulation: NOTCH1 --> AKT1 10.2174/1381612822666161006160524  
positive Regulation: NOTCH1 --> 28241766 10.1186/s12967-017-1151-6  
positive Regulation: NOTCH1 --> 27593934 10.1038/onc.2016.275  
positive Regulation: NOTCH1 --> 27593934 10.1038/onc.2016.275  
positive Regulation: NOTCH1 --> 27593934 10.1038/onc.2016.275  
positive Regulation: NOTCH1 --> AKT1 10.1074/jbc.M116.759134  
positive Regulation: NOTCH1 --> AKT1 10.1074/jbc.M116.759134  
positive Regulation: NOTCH1 --> 28872614 10.3390/i.jms18091904  
positive Regulation: NOTCH1 --> 28849037 10.3892/mmr.2017.7319  
positive Regulation: NOTCH1 --> 28918490 10.1007/s12032-017-1039-6  
positive Regulation: NOTCH1 --> 29095436 10.1038/cddis.2017.543  
positive Regulation: NOTCH1 --> AKT1 10.1074/jbc.M117.790121  
positive Regulation: NOTCH1 --> 29321718 10.1186/s12935-017-0496-5  
positive Regulation: NOTCH1 --> 28951560 10.1038/leu.2017.301  
positive Regulation: NOTCH1 --> AKT1 10.1097/PAS.0000000000001042  
positive Regulation: NOTCH1 --> 29545603 10.1038/s41388-018-0188-1  
positive Regulation: NOTCH1 --> 30845764 10.3390/i.jms20051151  
positive Regulation: NOTCH1 --> AKT1 10.1139/c.jpp-2018-0544  
positive Regulation: NOTCH1 --> AKT1 10.1155/2019/8707053  
positive Regulation: NOTCH1 --> AKT1 10.1186/s13046-019-1319-4  
positive Regulation: NOTCH1 --> AKT1 10.1007/s00280-019-03990-4  
positive Regulation: NOTCH1 --> AKT1 10.1007/s00280-019-03990-4  
positive Regulation: NOTCH1 --> AKT1 10.1007/s00280-019-03990-4  
positive Regulation: NOTCH1 --> 22710837 10.3892/or.2012.1856  
positive Regulation: NOTCH1 --> 22491738 10.3324/haematol.2011.059030  
positive Regulation: NOTCH1 --> 20458516 10.1007/s00018-010-0391-x  
positive Regulation: NOTCH1 --> 22004682 10.1186/1476-4598-10-130  
positive Regulation: NOTCH1 --> 22074495 10.1186/1476-4598-10-138  
positive Regulation: NOTCH1 --> 20616044 10.1073/pnas.1000132107  
positive Regulation: NOTCH1 --> 32792479 10.1038/s41419-020-02873-4  
positive Regulation: NOTCH1 --> 33015852 10.1111/fcp.1260810.1111/fcp.12608  
positive Regulation: NOTCH1 --> 20616044 10.1073/pnas.1000132107  
positive Regulation: NOTCH1 --> 22065781 10.1073/pnas.1104943108  
positive Regulation: NOTCH1 --> 23012411 10.1073/pnas.1206268109  
positive Regulation: NOTCH1 --> 23012411 10.1073/pnas.1206268109

positive Regulation: NOTCH1 --> 23531541 10.3390/ijms14046863  
positive Regulation: NOTCH1 --> 24140475 10.1016/j.cellsig.2013.09.021  
positive Regulation: NOTCH1 --> 24140475 10.1016/j.cellsig.2013.09.021  
positive Regulation: NOTCH1 --> 18924608  
positive Regulation: NOTCH1 --> AKT1 10.1074/jbc.M116.759134  
positive Regulation: NOTCH1 --> 30105616 10.1007/s00018-018-2905-x  
positive Regulation: NOTCH1 --> 33162798 10.7150/ijms.43184  
positive Regulation: NOTCH1 --> 33176854 10.1186/s13046-020-01750-4  
positive Regulation: NOTCH1 --> 33412518 10.18632/aging.202462  
positive Regulation: NOTCH1 --> 33964962 10.1186/s12935-021-01952-6  
positive Regulation: NOTCH1 --> 34006834 10.1038/s41419-021-03735-3  
positive Regulation: NOTCH1 --> 33802884 10.3390/molecules26061681  
positive Regulation: NOTCH1 --> 34502291 10.3390/ijms22179382  
positive Regulation: NOTCH1 --> 34465724 10.1038/s41389-021-00348-510.1038/s41389-021-  
positive Regulation: NOTCH1 --> 34495871 10.18632/aging.20326110.18632/aging.203261  
positive Regulation: NOTCH1 --> 34495871 10.18632/aging.203261  
positive Regulation: NOTCH1 --> 34495871 10.18632/aging.203261  
positive Regulation: NOTCH1 --> AKT1 10.2298/ABS210423030R  
positive Regulation: NOTCH1 --> AKT1 10.1016/j.jsps.2021.12.009  
positive Regulation: NOTCH1 --> 34995552 10.1016/j.mvr.2021.10430810.1016/j.mvr.2021.1  
positive Expression: PTGS2 --> (33617828 10.1016/j.ejphar.2021.173960  
positive Expression: PTGS2 --> (31884388 10.1016/j.molimm.2019.12.012  
positive Expression: PTGS2 --> (32044411 10.1016/j.jaad.2020.02.006  
positive Expression: PTGS2 --> (32018066 10.1016/j.intimp.2020.106206  
positive Expression: PTGS2 --> (33765613 10.1016/j.intimp.2021.107553  
positive Expression: PTGS2 --> (28231855 10.1186/s12967-017-1150-7  
positive Expression: PTGS2 --> (28231855 10.1186/s12967-017-1150-7  
positive Expression: PTGS2 --> (28231855 10.1186/s12967-017-1150-7  
positive Expression: PTGS2 --> (30061230 10.21873/anticanres.12768  
positive Expression: PTGS2 --> (32234916 10.21873/anticanres.14182  
positive Expression: PTGS2 --> (32823961 10.3390/ijms21165845  
positive Expression: PTGS2 --> (30591531 10.1124/jpet.118.254359  
positive Expression: PTGS2 --> (32942970 10.2174/0929867327999200917150939  
positive Expression: PTGS2 --> (24004819 10.1186/bcr3469  
positive Expression: PTGS2 --> (24004819 10.1186/bcr3469  
positive Expression: PTGS2 --> (24004819 10.1186/bcr3469  
positive Expression: PTGS2 --> (25880839 10.1186/s13075-015-0596-3  
positive Expression: PTGS2 --> (28096371 10.1073/pnas.161292011410.1073/pnas.161292011  
positive Expression: PTGS2 --> (28096371 10.1073/pnas.161292011410.1073/pnas.161292011  
positive Expression: PTGS2 --> (28231855 10.1186/s12967-017-1150-710.1186/s12967-017-1  
positive Expression: PTGS2 --> (30061230 10.21873/anticanres.1276810.21873/anticanres.  
positive Expression: PTGS2 --> (34466408 10.2147/RRU.S32451010.2147/RRU.S324510  
positive Expression: PTGS2 --> CD274 10.1016/j.jaad.2020.02.006  
positive Expression: PTGS2 --> (28231855 10.1186/s12967-017-1150-7  
positive Expression: PTGS2 --> (29808460 10.1007/s10555-018-9729-x  
positive Expression: PTGS2 --> CD274 10.1124/jpet.118.254359  
positive Expression: PTGS2 --> (34987061 10.1158/1940-6207.CAPR-21-0227  
positive Expression: PTGS2 --> (35237322 10.1155/2022/4598573  
positive Expression: PTGS2 --> (35373258 10.1158/1940-6207.CAPR-22-0052  
positive Expression: PTGS2 --> (35373258 10.1158/1940-6207.CAPR-22-0052  
positive Expression: PTGS2 --> (34987061 10.1158/1940-6207.CAPR-21-0227

positive Expression: PTGS2 --> (34987061 10.1158/1940-6207.CAPR-21-0227  
 positive Expression: PTGS2 --> (34987061 10.1158/1940-6207.CAPR-21-0227  
 positive Expression: PTGS2 --> (34987061 10.1158/1940-6207.CAPR-21-0227  
 positive Expression: PTGS2 --> (35288737 10.1158/1940-6207.CAPR-22-0038  
 positive Expression: PTGS2 --> CD274 10.1016/j.immuni.2022.07.001  
 negative Regulation: MCL1 ---| cf27847320 10.1016/j.bbrc.2016.11.049  
 negative Regulation: MCL1 ---| cf12787138 10.1046/j.1523-1747.2003.12252.x  
 negative Regulation: MCL1 ---| cf23954445 10.1016/j.bbamcr.2013.08.006  
 negative Regulation: MCL1 ---| cf28343875 10.1016/j.bmcl.2017.03.028  
 negative Regulation: MCL1 ---| cf18601905 10.1016/j.bbrc.2008.06.098  
 negative Regulation: MCL1 ---| cf20004446 10.1016/j.surg.2009.10.033  
 negative Regulation: MCL1 ---| cf20004446 10.1016/j.surg.2009.10.033  
 negative Regulation: MCL1 ---| cf12787138  
 negative Regulation: MCL1 ---| cf30221675 10.3892/ijo.2018.4557  
 negative Regulation: MCL1 ---| cf23257783 10.1038/leu.2012.367  
 negative Regulation: MCL1 ---| cf24223823 10.1371/journal.pone.0078570  
 negative Regulation: MCL1 ---| cf24982331  
 negative Regulation: MCL1 ---| cf18297287 10.1007/s00280-008-0697-710.1007/s00280-008-0  
 negative Regulation: MCL1 ---| cf18297287 10.1007/s00280-008-0697-710.1007/s00280-008-0  
 negative Regulation: MCL1 ---| cf18297287 10.1007/s00280-008-0697-710.1007/s00280-008-0  
 negative Regulation: MCL1 ---| cf27049076  
 negative Regulation: MCL1 ---| cf27686452 10.1007/s11010-016-2827-6  
 negative Regulation: MCL1 ---| cf31754782 10.1007/s00441-019-03105-810.1007/s00441-019-  
 negative Regulation: MCL1 ---| cf746 10.1016/j.bmcl.2017.03.028  
 negative Regulation: MCL1 ---| cf34781999 10.1186/s13046-021-02149-5  
 negative Regulation: MCL1 ---| cf35031927 10.1007/s11033-021-07040-2  
 positive Expression: UCA1 --> M#31276678 10.1016/j.jid.2019.04.029  
 positive Expression: UCA1 --> M#30468471 10.26355/eurrev-201811-16263  
 positive Expression: UCA1 --> MAPK1  
 positive Expression: UCA1 --> M#31276678 10.1016/j.jid.2019.04.029  
 positive Expression: UCA1 --> M#30556875 10.26355/eurrev\_201812\_16532  
 positive Expression: UCA1 --> M#32843741 10.1038/s41417-020-00214-3  
 positive Expression: UCA1 --> M#33936199 10.1155/2021/5519720  
 positive Expression: UCA1 --> M#32560605 10.2174/1566524020666200619124543  
 positive Expression: UCA1 --> M#31276678 10.1016/j.jid.2019.04.029  
 positive Expression: UCA1 --> M#31276678 10.1016/j.jid.2019.04.029  
 positive Expression: SNCAIP --> 20185556 10.1093/hmg/ddq08610.1093/hmg/ddq086  
 negative QuantitativeChange: hypc35294329 10.1080/21655979.2022.205126610.1080/21655979  
 positive Expression: MAPK1 --> (28237619 10.1016/j.tox.2017.02.008  
 Regulation: KDM5B ---> RAC1 34455465 10.1007/s00383-021-05005-x  
 positive Regulation: KDM5B --> F1245 10.1016/j.trecan.2017.08.004  
 positive Regulation: KDM5B --> F1245 10.1016/j.trecan.2017.08.004  
 positive Regulation: KDM5B --> PTEN 10.3892/mmr.2019.9832  
 positive Regulation: KDM5B --> F25909289 10.18632/oncotarget.3713  
 positive Regulation: KDM5B --> F28958389 10.1016/j.trecan.2017.08.004  
 positive Regulation: KDM5B --> F35946516 10.1097/CAD.0000000000001329  
 positive Regulation: KDM5B --> F28958389 10.1016/j.trecan.2017.08.004  
 positive Regulation: KDM5B --> F30628696 10.3892/mmr.2019.9832  
 positive Regulation: KDM5B --> F35946516 10.1097/CAD.0000000000001329  
 positive Regulation: KDM5B --> F35946516 10.1097/CAD.0000000000001329  
 positive Regulation: KDM5B --> F35946516 10.1097/CAD.0000000000001329  
 Regulation: GRK4 ---> MAPK1 23693024 10.1016/j.jocn.2012.10.008  
 Regulation: GRK4 ---> MAPK1 29921886 10.1038/s41401-018-0049-z  
 Expression: NOTCH1 ---> SPP1 32707422 10.1016/j.cyto.2020.155193

Expression: NOTCH1 ---> SPP1 33162798 10.7150/ijms.43184  
Expression: NOTCH1 ---> SPP1 18237408  
Expression: NOTCH1 ---> SPP1 16195230  
positive Expression: NOTCH1 --> 29548748 10.1016/j.yexpr.2018.03.014  
positive Expression: NOTCH1 --> 31927049 10.1016/j.lfs.2020.117291  
positive Expression: NOTCH1 --> 30336197 10.1016/j.canlet.2018.09.031  
positive Expression: NOTCH1 --> 28457880 10.1016/j.ctrv.2017.04.003  
positive Expression: NOTCH1 --> 29358129 10.1016/j.biopha.2018.01.086  
positive Expression: NOTCH1 --> 26362310 10.1186/s12885-015-1625-y  
positive Expression: NOTCH1 --> 27468877 10.4149/neo\_2016\_510  
positive Expression: NOTCH1 --> 27468877 10.4149/neo\_2016\_510  
positive Expression: NOTCH1 --> 29328395 10.3892/or.2018.6205  
positive Expression: NOTCH1 --> 31357721 10.3390/ijms20153696  
positive Expression: NOTCH1 --> 31964857 10.12659/MSM.919566  
positive Expression: NOTCH1 --> 31571144 10.1007/s12272-019-01183-4  
positive Expression: NOTCH1 --> 31747319 10.1139/cjpp-2019-0448  
positive Expression: NOTCH1 --> 22143792 10.1073/pnas.1019452108  
positive Expression: NOTCH1 --> 24700253 10.3892/or.2014.3123  
positive Expression: NOTCH1 --> 25763542 10.1097/CAD.0000000000000227  
positive Expression: NOTCH1 --> 22143792 10.1073/pnas.101945210810.1073/pnas.101945210  
positive Expression: NOTCH1 --> 24782036 10.1007/s11010-014-2069-410.1007/s11010-014-2  
positive Expression: NOTCH1 --> 24782036 10.1007/s11010-014-2069-410.1007/s11010-014-2  
positive Expression: NOTCH1 --> 26362310 10.1186/s12885-015-1625-y10.1186/s12885-015-1  
positive Expression: NOTCH1 --> 27468877 10.4149/neo\_2016\_51010.4149/neo\_2016\_510  
positive Expression: NOTCH1 --> 27468877 10.4149/neo\_2016\_51010.4149/neo\_2016\_510  
positive Expression: NOTCH1 --> 29548748 10.1016/j.yexpr.2018.03.01410.1016/j.yexpr.20  
positive Expression: NOTCH1 --> 31747319 10.1139/cjpp-2019-044810.1139/cjpp-2019-0448



positive Expression: NOTCH1 --> ABCC1 10.3390/ijms20153696  
 positive Expression: NOTCH1 --> ABCC1 10.12659/MSM.919566  
 positive Expression: NOTCH1 --> ABCC1 10.1007/s12272-019-01183-4  
 positive Expression: NOTCH1 --> ABCC1 10.1139/cjpp-2019-0448  
 positive Expression: NOTCH1 --> ABCC1 10.1097/CAD.0000000000000227  
 positive Expression: NOTCH1 --> 23458608 10.1016/j.pharmthera.2013.02.003  
 positive Expression: NOTCH1 --> 23458608 10.1016/j.pharmthera.2013.02.003  
 positive Expression: NOTCH1 --> 24050699 10.1146/annurev-pharmtox-011613-135959  
 positive Expression: NOTCH1 --> 22143792 10.1073/pnas.1019452108  
 positive Expression: NOTCH1 --> ABCC1  
 positive Expression: NOTCH1 --> ABCC1 10.2174/1381612822666160302103646  
 positive Expression: NOTCH1 --> ABCC1 10.1016/j.drug.2021.100795  
 positive Expression: NOTCH1 --> 35163586 10.3390/ijms23031665  
 Expression: GPER1 ---> PTGS2 30092317 10.1016/j.dci.2018.08.001  
 Expression: GPER1 ---> PTGS2 33035625 10.1016/j.mce.2020.111053  
 Expression: GPER1 ---> PTGS2 29747742 10.1016/j.phymed.2018.03.039  
 Expression: GPER1 ---> PTGS2 29747742 10.1016/j.phymed.2018.03.039  
 Expression: GPER1 ---> PTGS2 26241029 10.1016/j.jsbmb.2015.07.019  
 Expression: GPER1 ---> PTGS2 32791253 10.1016/j.cbpc.2020.108868  
 Expression: GPER1 ---> PTGS2 30705108 10.1042/CS20180919  
 Expression: GPER1 ---> PTGS2 30705108 10.1042/CS2018091910.1042/CS20180919  
 Expression: GPER1 ---> PTGS2 28347854 10.1016/j.jsbmb.2017.03.021  
 Expression: GPER1 ---> PTGS2 26241029 10.1016/j.jsbmb.2015.07.019  
 Expression: GPER1 ---> PTGS2 26241029 10.1016/j.jsbmb.2015.07.019  
 Expression: GPER1 ---> PTGS2 10.1016/j.bbrc.2019.05.045  
 Expression: GPER1 ---> PTGS2 10.1042/CS20180919  
 negative Expression: SPP1 ---| NC21747408 10.1038/icb.2011.47  
 negative Expression: SPP1 ---| NC23800491 10.1016/j.expchem.2013.06.005  
 positive PromoterBinding: PPARG -28416286 10.1016/j.stemcr.2017.03.008  
 positive PromoterBinding: PPARG -29311623 10.1038/s41418-017-0004-4  
 positive PromoterBinding: PPARG -31993929 10.1007/s11010-020-03689-8  
 positive PromoterBinding: PPARG -33352766 10.3390/ijms21249721  
 positive PromoterBinding: PPARG -19168033 10.1016/j.bbrc.2009.01.06010.1016/j.bbrc.2009  
 positive PromoterBinding: PPARG -26942868 10.1080/01635581.2016.1142581  
 positive PromoterBinding: PPARG -25700221 10.1042/CS20140631  
 positive PromoterBinding: PPARG -25881671 10.1042/CS20130463  
 positive PromoterBinding: PPARG -25881671 10.1042/CS20130463  
 positive PromoterBinding: PPARG -25881671 10.1042/CS20130463  
 positive PromoterBinding: PPARG --> TP53 10.1007/s11010-020-03689-8  
 positive PromoterBinding: PPARG --> TP53 10.1042/CS20140631  
 positive PromoterBinding: PPARG --> TP53 10.1074/jbc.M113.453886  
 positive PromoterBinding: PPARG -21445621 10.1007/s00394-011-0187-2  
 positive PromoterBinding: PPARG -21445621 10.1007/s00394-011-0187-2  
 positive PromoterBinding: PPARG -16887883 10.1210/me.2006-0192

positive PromoterBinding: PPARG -27077805 10.1038/cddis.2016.92  
 positive PromoterBinding: PPARG ---> TP53 10.3390/ijms222111360  
 positive PromoterBinding: PPARG -35471732 10.1096/fj.202200251R  
 positive PromoterBinding: TP53 --31852624 10.1016/j.neuint.2019.104644  
 positive PromoterBinding: TP53 --31852624 10.1016/j.neuint.2019.104644  
 positive PromoterBinding: TP53 --29073938 10.1186/s13046-017-0617-y10.1186/s13046-017-0  
 positive PromoterBinding: TP53 --23220650 10.1016/j.neulet.2012.11.04710.1016/j.neulet.  
 positive PromoterBinding: TP53 --20308559 10.1073/pnas.091108210710.1073/pnas.091108210  
 positive PromoterBinding: TP53 --20661255 10.1038/nrg2843  
 positive PromoterBinding: TP53 --25197016 10.1186/1471-2407-14-656  
 positive PromoterBinding: TP53 --24219989 10.1038/emboj.2013.242  
 positive PromoterBinding: TP53 --24219989 10.1038/emboj.2013.242  
 positive PromoterBinding: TP53 --23343952 10.1097/PAI.0b013e3182773125  
 positive PromoterBinding: TP53 --34666780 10.1186/s12986-021-00615-7  
 positive PromoterBinding: TP53 --35410210 10.1186/s12935-022-02557-3  
 positive PromoterBinding: TP53 --36612285 10.3390/cancers15010288  
 positive PromoterBinding: TP53 --36612285 10.3390/cancers15010288  
 PromoterBinding: TP53 ---> PPARG 21854837 10.1016/j.brainresbull.2011.07.021  
 PromoterBinding: TP53 ---> PPARG 23412343 10.1038/cdd.2013.9  
 PromoterBinding: TP53 ---> PPARG 21510869 10.1186/1471-2407-11-149  
 PromoterBinding: TP53 ---> PPARG 21445621 10.1007/s00394-011-0187-2  
 PromoterBinding: TP53 ---> PPARG 30181511 10.3390/ijms19092622  
 PromoterBinding: TP53 ---> PPARG 30143607 10.1038/s41467-018-05711-6  
 PromoterBinding: TP53 ---> PPARG 29593329 10.1038/s41556-018-0072-9  
 PromoterBinding: TP53 ---> PPARG 10.1016/j.brainresbull.2011.07.021  
 PromoterBinding: TP53 ---> PPARG 29311623 10.1038/s41418-017-0004-4  
 PromoterBinding: TP53 ---> PPARG 17651710  
 PromoterBinding: TP53 ---> PPARG 24675459 10.1038/cddis.2014.87  
 PromoterBinding: TP53 ---> PPARG 24312426 10.1371/journal.pone.0082494  
 PromoterBinding: TP53 ---> PPARG 23977392 10.1371/journal.pone.0073709  
 PromoterBinding: TP53 ---> PPARG 22074662 10.1016/j.biocel.2011.10.023  
 PromoterBinding: TP53 ---> PPARG 21421225 10.1016/j.juro.2010.12.101  
 PromoterBinding: TP53 ---> PPARG 19168033 10.1016/j.bbrc.2009.01.060  
 PromoterBinding: TP53 ---> PPARG  
 PromoterBinding: TP53 ---> PPARG 28155209 10.1007/s11999-017-5259-z  
 PromoterBinding: TP53 ---> PPARG 10.2741/4475  
 positive QuantitativeChange: hypc28327194 10.1186/s12943-017-0635-6  
 Regulation: UCA1 ---> hypopharyng28327194 10.1186/s12943-017-0635-6  
 Regulation: UCA1 ---> hypopharyng28327194 10.1186/s12943-017-0635-6  
 Regulation: UCA1 ---> hypopharyng29368602 10.1186/s12943-018-0763-7  
 Regulation: UCA1 ---> hypopharyng28327194 10.1186/s12943-017-0635-610.1186/s12943-017-0  
 Regulation: UCA1 ---> hypopharyng28327194 10.1186/s12943-017-0635-610.1186/s12943-017-0  
 Regulation: UCA1 ---> hypopharyng35836822 10.1155/2022/1562219  
 Regulation: LRP8 ---> TP53 24840660 10.1016/j.bbdis.2014.05.009  
 Regulation: LRP8 ---> TP53  
 ProtModification: AKT1 ---> BECN129921586 10.1074/jbc.RA118.002934

ProtModification: AKT1 ---> BECN124257753 10.1074/jbc.M113.532978  
ProtModification: AKT1 ---> BECN124257753 10.1074/jbc.M113.532978  
ProtModification: AKT1 ---> BECN124257753 10.1074/jbc.M113.532978  
ProtModification: AKT1 ---> BECN1 10.1074/jbc.P113.532978  
ProtModification: AKT1 ---> BECN127994061 10.1074/jbc.M116.758268  
ProtModification: AKT1 ---> BECN127994061 10.1074/jbc.M116.758268  
ProtModification: AKT1 ---> BECN127994061 10.1074/jbc.M116.758268  
ProtModification: AKT1 ---> BECN132428566 10.1016/j.biochi.2020.04.025  
ProtModification: AKT1 ---> BECN130578829 10.1016/j.cellsig.2018.12.008  
ProtModification: AKT1 ---> BECN131260798 10.1016/j.cellsig.2019.109353  
ProtModification: AKT1 ---> BECN133838253 10.1016/j.matbio.2021.04.001  
ProtModification: AKT1 ---> BECN133540047 10.1016/j.phrs.2021.105428  
ProtModification: AKT1 ---> BECN131430557 10.1016/j.semancer.2019.08.020  
ProtModification: AKT1 ---> BECN131972372 10.1016/j.mito.2020.01.002  
ProtModification: AKT1 ---> BECN132200042 10.1016/j.gpb.2020.01.001  
ProtModification: AKT1 ---> BECN133717651 10.1016/j.omtn.2021.02.005  
ProtModification: AKT1 ---> BECN123232185 10.1016/j.bbcan.2012.12.001  
ProtModification: AKT1 ---> BECN124269817 10.1016/j.bbrc.2013.11.048  
ProtModification: AKT1 ---> BECN123827971 10.1016/j.pneurobio.2013.06.002  
ProtModification: AKT1 ---> BECN123811268 10.1016/j.semancer.2013.06.007  
ProtModification: AKT1 ---> BECN124630600 10.1016/j.tibs.2014.02.003  
ProtModification: AKT1 ---> BECN124976620 10.1016/j.ajpath.2014.05.010  
ProtModification: AKT1 ---> BECN125172632 10.1016/j.jnutbio.2014.06.006  
ProtModification: AKT1 ---> BECN127191591 10.1371/journal.ppat.1005652  
ProtModification: AKT1 ---> BECN126018563 10.1080/15548627.2015.1043076  
ProtModification: AKT1 ---> BECN127335173 10.1152/ajpcell.00129.2016  
ProtModification: AKT1 ---> BECN127335173 10.1152/ajpcell.00129.2016  
ProtModification: AKT1 ---> BECN127335173 10.1152/ajpcell.00129.2016  
ProtModification: AKT1 ---> BECN128428363 10.1530/JOE-17-0081  
ProtModification: AKT1 ---> BECN129218076  
ProtModification: AKT1 ---> BECN129218076  
ProtModification: AKT1 ---> BECN129313410 10.1080/15548627.2017.1422851  
ProtModification: AKT1 ---> BECN129921586 10.1074/jbc.RA118.002934  
ProtModification: AKT1 ---> BECN129872222 10.1038/s41388-018-0330-0  
ProtModification: AKT1 ---> BECN130546075 10.1038/s41418-018-0254-9  
ProtModification: AKT1 ---> BECN130204590 10.1515/revneuro-2018-0045  
ProtModification: AKT1 ---> BECN131175269 10.12659/MSM.915730  
ProtModification: AKT1 ---> BECN131843932 10.1073/pnas.1915139116  
ProtModification: AKT1 ---> BECN131843932 10.1073/pnas.1915139116  
ProtModification: AKT1 ---> BECN131776982 10.1007/978-981-15-0602-4\_5  
ProtModification: AKT1 ---> BECN131852899 10.1038/s41467-019-13659-4  
ProtModification: AKT1 ---> BECN132121251 10.3390/ijms21051643  
ProtModification: AKT1 ---> BECN132187724 10.15252/embj.2019103111  
ProtModification: AKT1 ---> BECN1 10.3324/HAEMATOL.2018.212027  
ProtModification: AKT1 ---> BECN132715758 10.1152/ajprenal.00594.2019  
ProtModification: AKT1 ---> BECN133495338 10.1073/pnas.2020478118  
ProtModification: AKT1 ---> BECN123817237 10.1038/ncb2797  
ProtModification: AKT1 ---> BECN124006406 10.3324/haematol.2012.079061  
ProtModification: AKT1 ---> BECN123980547 10.1165/rcmb.2013-0314TR  
ProtModification: AKT1 ---> BECN123980547 10.1165/rcmb.2013-0314TR  
ProtModification: AKT1 ---> BECN124257753 10.1074/jbc.M113.532978

ProtModification: AKT1 ---> BECN124257753 10.1074/jbc.M113.532978  
ProtModification: AKT1 ---> BECN124257753 10.1074/jbc.M113.532978  
ProtModification: AKT1 ---> BECN124257753 10.1074/jbc.M113.532978  
ProtModification: AKT1 ---> BECN123708729 10.1007/s10059-013-0140-8  
ProtModification: AKT1 ---> BECN123708729 10.1007/s10059-013-0140-8  
ProtModification: AKT1 ---> BECN124196588 10.1096/fj.13-235655  
ProtModification: AKT1 ---> BECN125412422 10.1371/journal.ppat.1004409  
ProtModification: AKT1 ---> BECN125412422 10.1371/journal.ppat.1004409  
ProtModification: AKT1 ---> BECN125633274 10.1210/me.2014-1367  
ProtModification: AKT1 ---> BECN125633274 10.1210/me.2014-1367  
ProtModification: AKT1 ---> BECN124714122 10.1159/000358670  
ProtModification: AKT1 ---> BECN124257753 10.1074/jbc.M113.53297810.1074/jbc.M113.53297  
ProtModification: AKT1 ---> BECN1 10.1016/j.semcan.2019.08.020  
ProtModification: AKT1 ---> BECN1 10.1530/JOE-17-0081  
ProtModification: AKT1 ---> BECN1 10.1074/jbc.RA118.002934  
ProtModification: AKT1 ---> BECN1 10.12659/MSM.915730  
ProtModification: AKT1 ---> BECN1 10.1073/pnas.1915139116  
ProtModification: AKT1 ---> BECN1 10.1073/pnas.1915139116  
ProtModification: AKT1 ---> BECN1 10.1007/978-981-15-0602-4\_5  
ProtModification: AKT1 ---> BECN1 10.1038/s41467-019-13659-4  
ProtModification: AKT1 ---> BECN134655756 10.1016/j.jnutbio.2021.108882  
ProtModification: AKT1 ---> BECN134382915 10.1080/15476286.2021.1960689  
ProtModification: AKT1 ---> BECN135749708 10.1089/cell.2022.0025  
ProtModification: AKT1 ---> BECN136142738 10.3390/ijms231810811  
ProtModification: AKT1 ---> BECN136243840 10.1007/978-3-031-06566-8\_3  
Regulation: SPP1 ---> chemosensit28433634 10.1016/j.bbrc.2017.04.100  
Regulation: SPP1 ---> chemosensit30535434 10.3892/ijo.2018.4656  
Regulation: SPP1 ---> chemosensit21539449 10.1089/cbr.2010.0838  
Regulation: SPP1 ---> chemosensit30627777 10.1007/s00280-018-3759-510.1007/s00280-018-3  
Biomarker: hypopharyngeal squamot28327194 10.1186/s12943-017-0635-6  
Expression: AKT1 ---> BECN1 27756618 10.1016/j.bbrc.2016.10.043  
Expression: AKT1 ---> BECN1 27756618 10.1016/j.bbrc.2016.10.043  
Expression: AKT1 ---> BECN1 32750329 10.1016/j.bcp.2020.114188  
Expression: AKT1 ---> BECN1 30684759 10.1016/j.jinorgbio.2019.01.010  
Expression: AKT1 ---> BECN1 29331396 10.1016/j.pneurobio.2018.01.001  
Expression: AKT1 ---> BECN1 31128157 10.1016/j.neulet.2019.134287  
Expression: AKT1 ---> BECN1 28188923 10.1016/j.freeradbiomed.2017.02.015  
Expression: AKT1 ---> BECN1 22902321 10.1016/j.yjmcc.2012.08.001  
Expression: AKT1 ---> BECN1 26306675 10.1016/j.ejphar.2015.08.039  
Expression: AKT1 ---> BECN1 26593748 10.1016/j.freeradbiomed.2015.11.022  
Expression: AKT1 ---> BECN1 26593748 10.1016/j.freeradbiomed.2015.11.022  
Expression: AKT1 ---> BECN1 28151484 10.1038/cddis.2017.7  
Expression: AKT1 ---> BECN1 29909423 10.12659/MSM.907853  
Expression: AKT1 ---> BECN1 29498006 10.1007/s12035-018-0950-y  
Expression: AKT1 ---> BECN1 30183517 10.1080/15384047.2018.1507665  
Expression: AKT1 ---> BECN1 31718395 10.1089/jmf.2019.4411  
Expression: AKT1 ---> BECN1 31799599 10.1042/BSR20191041

Expression: AKT1 ---> BECN1 33920748 10.3390/ijms22084067  
 Expression: AKT1 ---> BECN1 22207710 10.1161/CIRCRESAHA.111.255950  
 Expression: AKT1 ---> BECN1 23519142 10.1097/FJC.0b013e318291c094  
 Expression: AKT1 ---> BECN1 24678780 10.3171/2014.1.JNS131534  
 Expression: AKT1 ---> BECN1 16697404 10.1016/j.yjmcc.2006.03.428  
 Expression: AKT1 ---> BECN1 29909423 10.12659/MSM.90785310.12659/MSM.907853  
 Expression: AKT1 ---> BECN1 30632514 10.4103/1673-5374.24747610.4103/1673-5374.247  
 Expression: AKT1 ---> BECN1 10.1089/jmf.2019.4411  
 Expression: AKT1 ---> BECN1 10.1042/BSR20191041  
 Expression: AKT1 ---> BECN1 10.3171/2014.1.JNS131534  
 Expression: AKT1 ---> BECN1 34759291 10.1038/s41419-021-04371-7  
 Expression: AKT1 ---> BECN1 33086879 10.1080/01635581.2020.1836241  
 Expression: AKT1 ---> BECN1 35109896 10.1186/s13041-022-00899-7  
 Expression: AKT1 ---> BECN1 34949740 10.14348/molcells.2021.0183  
 Expression: AKT1 ---> BECN1 35878674 10.1016/j.yexmp.2022.104814  
 Expression: AKT1 ---> BECN1 35851059 10.1038/s41419-022-05085-0  
 Expression: MAPK1 ---> PTEN 19000654 10.1016/j.bbrc.2008.10.157  
 Expression: MAPK1 ---> PTEN 19000654 10.1016/j.bbrc.2008.10.157  
 Expression: MAPK1 ---> PTEN 12808053  
 Expression: MAPK1 ---> PTEN 12808053  
 Expression: MAPK1 ---> PTEN 19002158  
 Expression: MAPK1 ---> PTEN 26686085 10.1038/onc.2015.470  
 Expression: MAPK1 ---> PTEN 26686085 10.1038/onc.2015.470  
 Expression: MAPK1 ---> PTEN 26686085 10.1038/onc.2015.470  
 Expression: MAPK1 ---> PTEN 30557170 10.1097/MPH.0000000000001386  
 Expression: MAPK1 ---> PTEN 31270502 10.1038/s41591-019-0499-y  
 Expression: MAPK1 ---> PTEN 24025251 10.4161/cbt.26234  
 Expression: MAPK1 ---> PTEN 24866016 10.1371/journal.pone.0098113  
 Expression: MAPK1 ---> PTEN 24866016 10.1371/journal.pone.0098113  
 Expression: MAPK1 ---> PTEN 25862896  
 Expression: MAPK1 ---> PTEN 17638924 10.1093/carcin/bgm159  
 Expression: MAPK1 ---> PTEN 21111719 10.1016/j.brainres.2010.11.06210.1016/j.brain  
 Expression: MAPK1 ---> PTEN 30735788 10.1016/j.nlm.2019.02.00510.1016/j.nlm.2019.0  
 Expression: MAPK1 ---> PTEN 10.1097/MPH.0000000000001386  
 Expression: MAPK1 ---> PTEN 10.1038/s41591-019-0499-y  
 Expression: MAPK1 ---> PTEN 19118244  
 Expression: MAPK1 ---> PTEN 19002158  
 Expression: MAPK1 ---> PTEN 19940030  
 Expression: MAPK1 ---> PTEN 24866016 10.1371/journal.pone.0098113  
 Expression: MAPK1 ---> PTEN 25512490 10.1073/pnas.1413186112  
 Expression: MAPK1 ---> PTEN 17638924  
 Expression: MAPK1 ---> PTEN 25512490 10.1073/pnas.1413186112  
 Expression: MAPK1 ---> PTEN  
 negative Expression: PTEN ---| M#19038262 10.1016/j.yjmcc.2008.10.021  
 negative Expression: PTEN ---| M#21194879 10.1016/j.ejso.2010.12.003  
 negative Expression: PTEN ---| M#27107786 10.1016/j.toxlet.2016.04.015  
 negative Expression: PTEN ---| M#27107786 10.1016/j.toxlet.2016.04.015  
 negative Expression: PTEN ---| M#28000852 10.3892/ijo.2016.3811  
 negative Expression: PTEN ---| M#29941984 10.1038/s41434-018-0020-0  
 negative Expression: PTEN ---| M#22367504 10.1152/ajpheart.00929.2011  
 negative Expression: PTEN ---| M#21544242 10.1371/journal.pone.001913910.1371/journal.p  
 negative Expression: PTEN ---| M#27107786 10.1016/j.toxlet.2016.04.01510.1016/j.toxlet.  
 negative Expression: PTEN ---| M#27388240 10.5966/sctm.2015-0200  
 negative Expression: PTEN ---| M#27388240 10.5966/sctm.2015-0200

negative Expression: PTEN ---| M# 34504554 10.3892/etm.2021.1053410.3892/etm.2021.10534  
positive Regulation: PRND --> TF24339999 10.1371/journal.pone.0082130  
positive Expression: TP53 --> M130130662 10.1016/j.semcancer.2018.08.008  
positive Expression: TP53 --> M132343915 10.1089/dna.2020.5457  
positive Expression: TP53 --> M130130662 10.1016/j.semcancer.2018.08.008  
positive Expression: TP53 --> M120729113 10.1016/j.ymgme.2010.07.016  
positive Expression: TP53 --> M121616186 10.1016/j.bbagrm.2011.05.005  
positive Expression: TP53 --> M122579961 10.1016/j.bbcan.2012.04.008  
positive Expression: TP53 --> M123220650 10.1016/j.neulet.2012.11.047  
positive Expression: TP53 --> M123220650 10.1016/j.neulet.2012.11.047  
positive Expression: TP53 --> M123220650 10.1016/j.neulet.2012.11.047  
positive Expression: TP53 --> M124739178 10.1016/j.bpj.2014.02.032  
positive Expression: TP53 --> MIR107 10.1016/j.canlet.2014.10.011  
positive Expression: TP53 --> M124942805 10.1016/j.bbagrm.2014.05.027  
positive Expression: TP53 --> M125451319 10.1016/j.canlet.2014.10.011  
positive Expression: TP53 --> M125758424 10.1016/j.urolonc.2015.02.003  
positive Expression: TP53 --> M120308559  
positive Expression: TP53 --> M120308559  
positive Expression: TP53 --> M129298665 10.1186/s12885-017-3941-x  
positive Expression: TP53 --> M129383635 10.1007/s10456-018-9600-2  
positive Expression: TP53 --> MIR107 10.2174/1381612825666190110161843  
positive Expression: TP53 --> M121909123 10.1038/aps.2011.103  
positive Expression: TP53 --> M124013378 10.3390/ijms140918319  
positive Expression: TP53 --> M123343952 10.1097/PAI.0b013e3182773125  
positive Expression: TP53 --> M124219989 10.1038/emboj.2013.242  
positive Expression: TP53 --> M124219989 10.1038/emboj.2013.242  
positive Expression: TP53 --> M125197016 10.1186/1471-2407-14-656  
positive Expression: TP53 --> M120661255 10.1038/nrg2843  
positive Expression: TP53 --> M120308559 10.1073/pnas.091108210710.1073/pnas.091108210  
positive Expression: TP53 --> M123220650 10.1016/j.neulet.2012.11.04710.1016/j.neulet.  
positive Expression: TP53 --> M129073938 10.1186/s13046-017-0617-y10.1186/s13046-017-0  
positive Expression: TP53 --> M123154181 10.1016/j.bbrc.2012.11.005  
positive Expression: TP53 --> M122841759 10.1016/j.freeradbiomed.2012.07.026  
positive Expression: TP53 --> M123074224 10.1074/jbc.M112.392076  
positive Expression: TP53 --> MIR107  
positive Expression: TP53 --> M133199193 10.1016/j.trecan.2020.10.005  
positive Expression: TP53 --> M133199193 10.1016/j.trecan.2020.10.005  
positive Expression: TP53 --> M134666780 10.1186/s12986-021-00615-7  
Regulation: DST ---> AKT1 21376539 10.1016/j.jdermsci.2011.01.005  
Expression: BECN1 ---> MCL1 27789215 10.1016/j.bcp.2016.10.006  
Expression: BECN1 ---> MCL1 31682805 10.1016/j.cbi.2019.108888  
Expression: BECN1 ---> MCL1 33545382 10.1016/j.drudis.2021.01.027  
Expression: BECN1 ---> MCL1 25472497 10.1038/ncomms6637  
Expression: BECN1 ---> MCL1 25472497 10.1038/ncomms6637  
Expression: BECN1 ---> MCL1 25472497 10.1038/ncomms6637  
Expression: BECN1 ---> MCL1 25837021 10.1080/15548627.2015.1029836  
Expression: BECN1 ---> MCL1 25837021 10.1080/15548627.2015.102983610.1080/15548627  
Expression: BECN1 ---> MCL1 25472497 10.1038/ncomms663710.1038/ncomms6637  
Expression: BECN1 ---> MCL1 25472497 10.1038/ncomms663710.1038/ncomms6637

Regulation: GPER1 ----> PTGS2 28347854 10.1016/j.jsbmb.2017.03.021  
 Regulation: GPER1 ----> PTGS2 26241029 10.1016/j.jsbmb.2015.07.019  
 Regulation: GPER1 ----> PTGS2 26241029 10.1016/j.jsbmb.2015.07.019  
 Regulation: GPER1 ----> PTGS2 10.1016/j.bbrc.2019.05.045  
 Regulation: GCLC ----> ABCC1 7488097 10.1006/bbrc.1995.2618  
 Regulation: GCLC ----> ABCC1 7488097 10.1006/bbrc.1995.2618  
 Regulation: GCLC ----> ABCC1 9063478  
 DirectRegulation: MCL1 ----> BECN124113155 10.4161/auto.2645210.4161/auto.26452  
 DirectRegulation: MCL1 ----> BECN123392173 10.1038/cddis.2013.1810.1038/cddis.2013.18  
 DirectRegulation: MCL1 ----> BECN1  
 DirectRegulation: MCL1 ----> BECN125484085 10.4161/15548627.2014.981916  
 DirectRegulation: MCL1 ----> BECN124535641 10.3892/or.2014.3015  
 DirectRegulation: MCL1 ----> BECN124113155 10.4161/auto.26452  
 DirectRegulation: MCL1 ----> BECN123681223 10.1038/cddis.2013.155  
 DirectRegulation: MCL1 ----> BECN123392173 10.1038/cddis.2013.18  
 DirectRegulation: MCL1 ----> BECN123392173 10.1038/cddis.2013.18  
 DirectRegulation: MCL1 ----> BECN123392177 10.1038/cddis.2013.17  
 DirectRegulation: MCL1 ----> BECN123688351 10.1186/1471-2202-14-56  
 DirectRegulation: MCL1 ----> BECN133931087 10.1186/s13046-021-01948-0  
 DirectRegulation: MCL1 ----> BECN131485222 10.1155/2019/2024648  
 DirectRegulation: MCL1 ----> BECN130842276 10.1073/pnas.1819869116  
 DirectRegulation: MCL1 ----> BECN130792387 10.1038/s41419-019-1407-6  
 DirectRegulation: MCL1 ----> BECN130066884 10.3892/or.2018.6599  
 DirectRegulation: MCL1 ----> BECN129976630 10.21873/cgp.20083  
 DirectRegulation: MCL1 ----> BECN127837217 10.1007/s00018-016-2403-y  
 DirectRegulation: MCL1 ----> BECN120200450  
 DirectRegulation: MCL1 ----> BECN123727157 10.1016/j.semcancer.2013.05.007  
 DirectRegulation: MCL1 ----> BECN123420005 10.1016/j.biocel.2013.02.007  
 DirectRegulation: MCL1 ----> BECN132307222 10.1016/j.tcb.2020.03.004  
 DirectRegulation: MCL1 ----> BECN131030977 10.1016/j.tcb.2019.03.004  
 DirectRegulation: MCL1 ----> BECN128259820 10.1016/j.canlet.2017.02.030  
 DirectRegulation: MCL1 ----> BECN117643073 10.4161/auto.4713  
 DirectRegulation: MCL1 ----> BECN125837021 10.1080/15548627.2015.1029836  
 DirectRegulation: MCL1 ----> BECN126018731 10.1080/15548627.2015.1049800  
 DirectRegulation: MCL1 ----> BECN125885284 10.1186/s12885-015-1239-4  
 DirectRegulation: MCL1 ----> BECN124912196 10.1073/pnas.1406425111  
 DirectRegulation: MCL1 ----> BECN124113155 10.4161/auto.26452  
 DirectRegulation: MCL1 ----> BECN124107625 10.4161/cc.26696  
 DirectRegulation: MCL1 ----> BECN123607597 10.2174/15680096113139990039  
 DirectRegulation: MCL1 ----> BECN123681223 10.1038/cddis.2013.155  
 DirectRegulation: MCL1 ----> BECN121364679 10.1038/cddis.2010.53  
 DirectRegulation: MCL1 ----> BECN121139567 10.1038/emboj.2010.327  
 DirectRegulation: MCL1 ----> BECN122614243 10.1038/leu.2012.136  
 DirectRegulation: MCL1 ----> BECN123688351 10.1186/1471-2202-14-56  
 DirectRegulation: MCL1 ----> BECN123688351 10.1186/1471-2202-14-56  
 DirectRegulation: MCL1 ----> BECN122638980 10.1007/s10495-012-0738-x  
 DirectRegulation: MCL1 ----> BECN123152582 10.1194/jlr.R031278  
 DirectRegulation: MCL1 ----> BECN122263800  
 DirectRegulation: MCL1 ----> BECN134069373 10.3390/ijms22105330  
 DirectRegulation: MCL1 ----> BECN129611474 10.2174/0929867325666180403145137

DirectRegulation: MCL1 ---> BECN129808796 10.14715/cmb/2018.64.6.5  
 DirectRegulation: MCL1 ---> BECN130327467 10.1038/s41467-018-06836-4  
 DirectRegulation: MCL1 ---> BECN128622296 10.1038/cdd.2017.82  
 DirectRegulation: MCL1 ---> BECN129363570 10.1530/REP-18-0002  
 DirectRegulation: MCL1 ---> BECN129333953 10.1080/15384047.2018.1423927  
 DirectRegulation: MCL1 ---> BECN128234359 10.1038/cdd.2017.22  
 DirectRegulation: MCL1 ---> BECN127527160 10.3390/ijms17081274  
 DirectRegulation: MCL1 ---> BECN119912650  
 DirectRegulation: MCL1 ---> BECN120200450  
 DirectRegulation: MCL1 ---> BECN125194337 10.1016/j.biocel.2014.08.022  
 DirectRegulation: MCL1 ---> BECN125194337 10.1016/j.biocel.2014.08.022  
 DirectRegulation: MCL1 ---> BECN124012660 10.1016/j.semcaner.2013.08.008  
 DirectRegulation: MCL1 ---> BECN122735572 10.1016/j.mito.2012.06.003  
 DirectRegulation: MCL1 ---> BECN121353614 10.1016/j.molcel.2011.02.009  
 DirectRegulation: MCL1 ---> BECN121353614 10.1016/j.molcel.2011.02.009  
 DirectRegulation: MCL1 ---> BECN120159550 10.1016/j.molcel.2010.01.025  
 DirectRegulation: MCL1 ---> BECN122305615 10.1016/j.jdermsci.2011.11.001  
 DirectRegulation: MCL1 ---> BECN121993018 10.1016/j.canlet.2011.09.020  
 DirectRegulation: MCL1 ---> BECN118589438 10.1016/j.jmb.2008.05.071  
 DirectRegulation: MCL1 ---> BECN129555460 10.1016/j.actbio.2018.03.022  
 DirectRegulation: MCL1 ---> BECN133497829 10.1016/j.drudis.2021.01.021  
 DirectRegulation: MCL1 ---> BECN131030977 10.1016/j.tcb.2019.03.004  
 DirectRegulation: MCL1 ---> BECN129549710 10.1016/j.conb.2018.02.023  
 DirectRegulation: MCL1 ---> BECN133508399 10.1016/j.cellsig.2021.109933  
 DirectRegulation: MCL1 ---> BECN131639425 10.1016/j.canlet.2019.10.030  
 DirectRegulation: MCL1 ---> BECN131837377 10.1016/j.taap.2019.114857  
 DirectRegulation: MCL1 ---> BECN130562490 10.1016/j.lfs.2018.12.027  
 DirectRegulation: MCL1 ---> BECN126009469 10.1016/j.jmb.2015.05.015  
 DirectRegulation: MCL1 ---> BECN132717194 10.1016/j.yjmcc.2020.07.009  
 DirectRegulation: MCL1 ---> BECN133831396 10.1016/j.bcp.2021.114544  
 DirectRegulation: MCL1 ---> BECN133631669 10.1016/j.bbrc.2021.02.045  
 DirectRegulation: MCL1 ---> BECN134688664 10.1016/j.jbc.2021.101339  
 DirectRegulation: MCL1 ---> BECN134657993 10.1007/s13105-021-00844-7  
 DirectRegulation: MCL1 ---> BECN134077348 10.2174/1568009621666210601113144  
 DirectRegulation: MCL1 ---> BECN134856903 10.2174/1568009621666211202091523  
 DirectRegulation: MCL1 ---> BECN135904454 10.1042/BCJ20210676  
 Binding: PRPH ---- DST 17569669 10.1074/jbc.M611703200  
 Binding: PRPH ---- DST 17569669  
 Binding: PRPH ---- DST 9971739  
 positive Expression: BIRC7 --> 132334197 10.1016/j.bioorg.2020.103863  
 positive Expression: BIRC7 --> 125785018  
 positive Expression: B3GNT3 --> 33683574 10.1007/s13258-021-01072-510.1007/s13258-021-  
 PromoterBinding: PPARG ---> PTGS2 14636669 10.1016/S0163-7827(03)00037-7  
 PromoterBinding: PPARG ---> PTGS2 17316818 10.1016/j.plipres.2007.01.001  
 PromoterBinding: PPARG ---> PTGS2 10.1016/j.jnutbio.2004.11.001  
 PromoterBinding: PPARG ---> PTGS2 16303334 10.1016/j.clim.2005.09.018  
 PromoterBinding: PPARG ---> PTGS2 18362203  
 PromoterBinding: PPARG ---> PTGS2 14645533  
 PromoterBinding: PPARG ---> PTGS2 20635307 10.1055/s-0030-1250111  
 PromoterBinding: PPARG ---> PTGS2 23365414 10.1095/biolreprod.112.107383  
 PromoterBinding: PPARG ---> PTGS2 24403546 10.1095/biolreprod.113.109223



PromoterBinding: PPARG ---> PTGS2 16443360 10.1016/j.jnutbio.2005.10.007  
PromoterBinding: PPARG ---> PTGS2  
ProtModification: AKT1 ---> PHF2C 22334668 10.1074/jbc.M111.333922  
ProtModification: AKT1 ---> PHF2C 22975685 10.1016/j.cellsig.2012.09.009  
ProtModification: AKT1 ---> PHF2C 22334668 10.1074/jbc.M111.333922  
ProtModification: AKT1 ---> PHF2C 22864287 10.1038/nsmb.2353  
ProtModification: AKT1 ---> PHF2C 22334668 10.1074/jbc.M111.333922  
ProtModification: AKT1 ---> PHF2C 22334668 10.1074/jbc.M111.333922  
ProtModification: AKT1 ---> PHF2C 22975685 10.1016/j.cellsig.2012.09.009  
ProtModification: AKT1 ---> PHF2C 22975685 10.1016/j.cellsig.2012.09.009  
ProtModification: AKT1 ---> PHF2C 22334668 10.1074/jbc.M111.333922  
ProtModification: AKT1 ---> PHF2C 22334668 10.1074/jbc.M111.333922  
ProtModification: AKT1 ---> PHF2C 22334668 10.1074/jbc.M111.333922  
ProtModification: AKT1 ---> PHF2C 22975685 10.1016/j.cellsig.2012.09.009  
Expression: NOTCH1 ---> MAPK1 32792479 10.1038/s41419-020-02873-4  
Expression: NOTCH1 ---> MAPK1 32792479 10.1038/s41419-020-02873-4  
Expression: NOTCH1 ---> MAPK1 34037092 10.1590/1414-431X2020E10685  
Expression: NOTCH1 ---> MAPK1 34037092 10.1590/1414-431X2020E10685  
Expression: NOTCH1 ---> MAPK1 23468978 10.1371/journal.pone.0057382  
Expression: NOTCH1 ---> MAPK1 26398771 10.3892/or.2015.4274  
Expression: NOTCH1 ---> MAPK1 26398771 10.3892/or.2015.427410.3892/or.2015.4274  
Expression: NOTCH1 ---> MAPK1 34109563 10.1007/s12017-021-08671-110.1007/s12017-021-  
Expression: NOTCH1 ---> MAPK1 32792479 10.1038/s41419-020-02873-410.1038/s41419-020-  
Expression: NOTCH1 ---> MAPK1 24472723 10.1124/jpet.113.20756310.1124/jpet.113.20756  
negative Regulation: PTEN ---| M# 16684527 10.1016/j.febslet.2006.04.064  
negative Regulation: PTEN ---| M# 27509846 10.3892/ijo.2016.3655  
negative Regulation: PTEN ---| M# 16684527 10.1016/j.febslet.2006.04.064  
negative Regulation: PTEN ---| M# 19167986 10.1016/j.proghi.2008.07.001  
negative Regulation: PTEN ---| M# 22182448 10.1016/j.canlet.2011.12.013  
negative Regulation: PTEN ---| M# 20056128 10.1016/j.neulet.2009.12.078  
negative Regulation: PTEN ---| M# 17336157 10.1016/j.it.2007.02.004  
negative Regulation: PTEN ---| M# 22172720 10.1016/j.ccr.2011.10.030  
negative Regulation: PTEN ---| M# 23219716 10.1016/j.ajpath.2012.10.007  
negative Regulation: PTEN ---| M# 23206598 10.1016/B978-0-12-398309-1.00007-X  
negative Regulation: PTEN ---| MAPK1 10.1016/j.joca.2013.02.280  
negative Regulation: PTEN ---| M# 23684551 10.1016/j.canlet.2013.05.007  
negative Regulation: PTEN ---| M# 25012567 10.1016/j.bmc.2014.06.046

negative Regulation: PTEN ---| M# 26764128 10.1016/j.ydbio.2015.12.027  
 negative Regulation: PTEN ---| M# 26460096 10.1016/j.ydbio.2015.10.002  
 negative Regulation: PTEN ---| M# 26437446 10.1016/j.tiv.2015.09.027  
 negative Regulation: PTEN ---| M# 27107786 10.1016/j.toxlet.2016.04.015  
 negative Regulation: PTEN ---| M# 19276401  
 negative Regulation: PTEN ---| M# 15824107  
 negative Regulation: PTEN ---| M# 15590688  
 negative Regulation: PTEN ---| M# 15590688  
 negative Regulation: PTEN ---| M# 15590688  
 negative Regulation: PTEN ---| M# 15121878  
 negative Regulation: PTEN ---| M# 14578361  
 negative Regulation: PTEN ---| M# 11689561  
 negative Regulation: PTEN ---| M# 11689561  
 negative Regulation: PTEN ---| M# 12235291  
 negative Regulation: PTEN ---| M# 20418918  
 negative Regulation: PTEN ---| M# 10698513  
 negative Regulation: PTEN ---| M# 20097771  
 negative Regulation: PTEN ---| M# 17277022  
 negative Regulation: PTEN ---| M# 11158326  
 negative Regulation: PTEN ---| M# 25398317 10.1186/s12964-014-0069-3  
 negative Regulation: PTEN ---| M# 25398317 10.1186/s12964-014-0069-3  
 negative Regulation: PTEN ---| M# 25398317 10.1186/s12964-014-0069-3  
 negative Regulation: PTEN ---| M# 25398317 10.1186/s12964-014-0069-3  
 negative Regulation: PTEN ---| M# 26135619 10.1038/ncomms8353  
 negative Regulation: PTEN ---| M# 27605619 10.1523/JNEUROSCI.0936-16.2016  
 negative Regulation: PTEN ---| M# 27605619 10.1523/JNEUROSCI.0936-16.2016  
 negative Regulation: PTEN ---| M# 22519449  
 negative Regulation: PTEN ---| M# 22875989 10.1091/mbc.E12-05-0337  
 negative Regulation: PTEN ---| M# 22746319 10.1089/ars.2011.4457  
 negative Regulation: PTEN ---| M# 23064324 10.3892/or.2012.2074  
 negative Regulation: PTEN ---| M# 20664988 10.3892/or-00000922  
 negative Regulation: PTEN ---| M# 20664988 10.3892/or-00000922  
 negative Regulation: PTEN ---| M# 20664988 10.3892/or-00000922  
 negative Regulation: PTEN ---| M# 21385768 10.1242/dev.058016  
 negative Regulation: PTEN ---| M# 22106098 10.1530/JOE-11-0296  
 negative Regulation: PTEN ---| M# 20738847 10.1186/1476-4598-9-224  
 negative Regulation: PTEN ---| M# 22761812 10.1371/journal.pone.0039520  
 negative Regulation: PTEN ---| M# 24413171 10.1242/jcs.143743  
 negative Regulation: PTEN ---| M# 23542173 10.1038/onc.2013.74  
 negative Regulation: PTEN ---| M# 24595168 10.1371/journal.pone.0090907  
 negative Regulation: PTEN ---| M# 24595168 10.1371/journal.pone.0090907  
 negative Regulation: PTEN ---| M# 24552815 10.4161/cc.27837  
 negative Regulation: PTEN ---| M# 24552815 10.4161/cc.27837  
 negative Regulation: PTEN ---| M# 24552815 10.4161/cc.27837  
 negative Regulation: PTEN ---| M# 24552815 10.4161/cc.27837  
 negative Regulation: PTEN ---| M# 24552815 10.4161/cc.27837  
 negative Regulation: PTEN ---| M# 24552815 10.4161/cc.27837  
 negative Regulation: PTEN ---| M# 24552815 10.4161/cc.27837  
 negative Regulation: PTEN ---| M# 24552815 10.4161/cc.27837  
 negative Regulation: PTEN ---| M# 24552815 10.4161/cc.27837  
 negative Regulation: PTEN ---| M# 24552815 10.4161/cc.27837  
 negative Regulation: PTEN ---| M# 24552815 10.4161/cc.27837  
 negative Regulation: PTEN ---| M# 24552815 10.4161/cc.27837  
 negative Regulation: PTEN ---| M# 26010537 10.1371/journal.pone.0127942  
 negative Regulation: PTEN ---| M# 26244501 10.1371/journal.pone.0133699  
 negative Regulation: PTEN ---| M# 26244501 10.1371/journal.pone.0133699

negative Regulation: PTEN ---| M# 26929372 10.1073/pnas.1523693113  
negative Regulation: PTEN ---| M# 10657643  
negative Regulation: PTEN ---| M# 11230180  
negative Regulation: PTEN ---| M# 12479095  
negative Regulation: PTEN ---| M# 12781042  
negative Regulation: PTEN ---| M# 15590688  
negative Regulation: PTEN ---| M# 19276401 10.1124/jpet.108.150367  
negative Regulation: PTEN ---| M# 20147383 10.1242/dev.040535  
negative Regulation: PTEN ---| M# 21076047 10.1158/1541-7786.MCR-10-0235  
negative Regulation: PTEN ---| M# 22737980 10.3109/10799893.2012.695798  
negative Regulation: PTEN ---| M# 22875989 10.1091/mbc.E12-05-0337  
negative Regulation: PTEN ---| M# 24595168 10.1371/journal.pone.0090907  
negative Regulation: PTEN ---| M# 24552815 10.4161/cc.27837  
negative Regulation: PTEN ---| M# 24552815 10.4161/cc.27837  
negative Regulation: PTEN ---| M# 24552815 10.4161/cc.27837  
negative Regulation: PTEN ---| M# 24552815 10.4161/cc.27837  
negative Regulation: PTEN ---| M# 25773930 10.1007/s10549-015-3337-z  
negative Regulation: PTEN ---| M# 26135619 10.1038/ncomms8353  
negative Regulation: PTEN ---| M# 26316702 10.2147/DDDT.S86184  
negative Regulation: PTEN ---| M# 26046303  
negative Regulation: PTEN ---| M# 16684527 10.1016/j.febslet.2006.04.064  
negative Regulation: PTEN ---| M# 24630093 10.1016/j.biomaterials.2014.02.037  
negative Regulation: PTEN ---| M# 12235113  
negative Regulation: PTEN ---| M# 23060448 10.1074/jbc.M112.405852  
negative Regulation: PTEN ---| M# 20884649 10.1189/jlb.0110001  
negative Regulation: PTEN ---| M# 22298084 10.1007/s00395-012-0248-6  
negative Regulation: PTEN ---| M# 18726116 10.1007/s00432-008-0465-4  
negative Regulation: PTEN ---| MAPK1  
negative Regulation: PTEN ---| M# 26686085 10.1038/onc.2015.470  
negative Regulation: PTEN ---| M# 27605619 10.1523/JNEUROSCI.0936-16.201610.1523/JNEUROSCI  
negative Regulation: PTEN ---| M# 28367561 10.1039/c6mb00786d  
negative Regulation: PTEN ---| M# 29048612 10.3892/ijo.2017.4126  
negative Regulation: PTEN ---| MAPK1 10.3892/mmr.2017.8092  
negative Regulation: PTEN ---| M# 29788729 10.4149/neo\_2018\_170208N89  
negative Regulation: PTEN ---| M# 29426973 10.1007/s11626-018-0232-z  
negative Regulation: PTEN ---| M# 29743588 10.1038/s41388-018-0251-y  
negative Regulation: PTEN ---| M# 29537337 10.1152/physrev.00025.2017  
Expression: TP53 ---> IGFBP4 21829624 10.1371/journal.pone.0022456  
negative PromoterBinding: TP53 --18234542 10.1016/j.oraloncology.2007.10.006  
negative PromoterBinding: TP53 --10196169  
negative PromoterBinding: TP53 --12411481  
negative PromoterBinding: TP53 --12411481  
negative PromoterBinding: TP53 --12411481  
negative PromoterBinding: TP53 --12411481  
negative PromoterBinding: TP53 --11085935  
negative PromoterBinding: TP53 --11085935  
negative PromoterBinding: TP53 --18254728  
negative PromoterBinding: TP53 --10196169  
negative PromoterBinding: TP53 --19247455  
negative PromoterBinding: TP53 --19247455  
negative PromoterBinding: TP53 --23384026 10.1186/1471-2407-13-62  
negative PromoterBinding: TP53 --27367679 10.3390/ijms17071026  
negative PromoterBinding: TP53 --12411481  
negative Expression: MIR107 ---| 31778666 10.1016/j.cbi.2019.108908

negative Expression: MIR107 ---| 31778666 10.1016/j.cbi.2019.108908  
 Expression: ING4 ---> NGF 24057236 10.1007/s11033-013-2675-3  
 ProtModification: MAPK1 ---> MCL118948586 10.1182/blood-2008-07-170241  
 ProtModification: MAPK1 ---> MCL112223490 10.1074/jbc.M207951200  
 ProtModification: MAPK1 ---> MCL130782845 10.1074/jbc.RA118.006029  
 ProtModification: MAPK1 ---> MCL130782845 10.1074/jbc.RA118.006029  
 ProtModification: MAPK1 ---> MCL129232553 10.1016/j.ccell.2017.11.003  
 ProtModification: MAPK1 ---> MCL129232547 10.1016/j.ccell.2017.11.010  
 ProtModification: MAPK1 ---> MCL129805077 10.1016/j.ccell.2018.05.001  
 ProtModification: MAPK1 ---> MCL134182005 10.1016/j.pharmthera.2021.107943  
 ProtModification: MAPK1 ---> MCL120079433 10.1016/j.bbadis.2009.12.009  
 ProtModification: MAPK1 ---> MCL120969960 10.1016/j.semancer.2010.10.011  
 ProtModification: MAPK1 ---> MCL116710358  
 ProtModification: MAPK1 ---> MCL117387146  
 ProtModification: MAPK1 ---> MCL117670986  
 ProtModification: MAPK1 ---> MCL117670986  
 ProtModification: MAPK1 ---> MCL117670986  
 ProtModification: MAPK1 ---> MCL129311244 10.1128/IAI.00504-17  
 ProtModification: MAPK1 ---> MCL129725697 10.1007/s00018-018-2826-8  
 ProtModification: MAPK1 ---> MCL129141533 10.2174/1381612823666171115105252  
 ProtModification: MAPK1 ---> MCL130782845 10.1074/jbc.RA118.006029  
 ProtModification: MAPK1 ---> MCL130782845 10.1074/jbc.RA118.006029  
 ProtModification: MAPK1 ---> MCL130819918 10.3324/haematol.2018.201343  
 ProtModification: MAPK1 ---> MCL131475898 10.2174/1568026619666190902151307  
 ProtModification: MAPK1 ---> MCL132576977 10.1038/s41580-020-0255-7  
 ProtModification: MAPK1 ---> MCL123171055 10.1186/1471-2407-12-541  
 ProtModification: MAPK1 ---> MCL123023732 10.1007/s40291-012-0003-6  
 ProtModification: MAPK1 ---> MCL121507240 10.1186/1476-4598-10-44  
 ProtModification: MAPK1 ---> MCL122751450 10.1038/leu.2012.180  
 ProtModification: MAPK1 ---> MCL124299309 10.4149/neo\_2014\_019  
 ProtModification: MAPK1 ---> MCL127004568 10.3892/or.2016.4695  
 ProtModification: MAPK1 ---> MCL118676833 10.1158/0008-5472.CAN-08-057910.1158/0008-547  
 ProtModification: MAPK1 ---> MCL118676833 10.1158/0008-5472.CAN-08-057910.1158/0008-547  
 ProtModification: MAPK1 ---> MCL128522751 10.1158/0008-5472.CAN-16-347010.1158/0008-547  
 ProtModification: MAPK1 ---> MCL1 10.1128/IAI.00504-17  
 ProtModification: MAPK1 ---> MCL1 10.1074/jbc.RA118.006029  
 ProtModification: MAPK1 ---> MCL1 10.1074/jbc.RA118.006029  
 ProtModification: MAPK1 ---> MCL1 10.2174/1568026619666190902151307  
 ProtModification: MAPK1 ---> MCL117670986  
 ProtModification: MAPK1 ---> MCL118846109  
 ProtModification: MAPK1 ---> MCL121507240 10.1186/1476-4598-10-44  
 ProtModification: MAPK1 ---> MCL121507240 10.1186/1476-4598-10-44  
 ProtModification: MAPK1 ---> MCL121730980 10.1038/bjc.2011.242  
 ProtModification: MAPK1 ---> MCL119249395 10.1053/j.gastro.2008.12.064  
 ProtModification: MAPK1 ---> MCL125196280 10.1016/j.yexpr.2014.08.039  
 ProtModification: MAPK1 ---> MCL124779770 10.1186/1476-4598-13-98  
 positive Expression: MAPK1 --> M23943652 10.1182/blood-2012-07-445635  
 positive Expression: MAPK1 --> M12855556 10.1182/blood-2003-03-0970  
 positive Expression: MAPK1 --> M32651234 10.1074/jbc.RA120.013364  
 positive Expression: MAPK1 --> M16109713 10.1074/jbc.M506551200  
 positive Expression: MAPK1 --> M18198176 10.1074/jbc.M709500200  
 positive Expression: MAPK1 --> M20452986 10.1074/jbc.M110.103010  
 positive Expression: MAPK1 --> M12963734 10.1074/jbc.M304793200  
 positive Expression: MAPK1 --> M12963734 10.1074/jbc.M304793200

positive Expression: MAPK1 --> M16014620 10.1074/jbc.M505537200  
positive Expression: MAPK1 --> M31301315 10.1016/j.taap.2019.114662  
positive Expression: MAPK1 --> M28526201 10.1016/j.virol.2016.12.011  
positive Expression: MAPK1 --> M28802908 10.1016/j.blre.2017.08.004  
positive Expression: MAPK1 --> M28987383 10.1016/j.canlet.2017.09.040  
positive Expression: MAPK1 --> M28934637 10.1016/j.ctrv.2017.08.012  
positive Expression: MAPK1 --> M31337603 10.1016/j.ymthe.2019.06.014  
positive Expression: MAPK1 --> M29805077 10.1016/j.ccell.2018.05.001  
positive Expression: MAPK1 --> M26299965 10.1016/j.celrep.2015.07.055  
positive Expression: MAPK1 --> M20394737 10.1016/j.bcp.2010.04.010  
positive Expression: MAPK1 --> M15970427 10.1016/j.cellsig.2005.05.021  
positive Expression: MAPK1 --> M20079433 10.1016/j.bbadis.2009.12.009  
positive Expression: MAPK1 --> M20969960 10.1016/j.semcancer.2010.10.011  
positive Expression: MAPK1 --> M19733679 10.1016/j.micinf.2009.08.014  
positive Expression: MAPK1 --> M17097560 10.1016/j.ccr.2006.10.006  
positive Expression: MAPK1 --> M19154985 10.1016/j.chom.2008.11.010  
positive Expression: MAPK1 --> M23524145 10.1016/j.yexcr.2013.03.012  
positive Expression: MAPK1 --> M24121058 10.1016/j.pharmthera.2013.10.001  
positive Expression: MAPK1 --> M24096094 10.1016/j.bone.2013.09.020  
positive Expression: MAPK1 --> M24096094 10.1016/j.bone.2013.09.020  
positive Expression: MAPK1 --> M25747387 10.1016/j.febslet.2015.02.026  
positive Expression: MAPK1 --> M26346348 10.1016/j.leukres.2015.08.007  
positive Expression: MAPK1 --> M26346348 10.1016/j.leukres.2015.08.007  
positive Expression: MAPK1 --> M26367324 10.1016/j.antiviral.2015.09.005  
positive Expression: MAPK1 --> M12107261  
positive Expression: MAPK1 --> M21219631  
positive Expression: MAPK1 --> M19498045  
positive Expression: MAPK1 --> M18198176  
positive Expression: MAPK1 --> M16109713  
positive Expression: MAPK1 --> M12963734  
positive Expression: MAPK1 --> M12963734  
positive Expression: MAPK1 --> M11368774  
positive Expression: MAPK1 --> M21258408  
positive Expression: MAPK1 --> M21258408  
positive Expression: MAPK1 --> M21258408  
positive Expression: MAPK1 --> M18846109  
positive Expression: MAPK1 --> M11314001  
positive Expression: MAPK1 --> M12612065  
positive Expression: MAPK1 --> M27529549 10.1371/journal.pone.0161343  
positive Expression: MAPK1 --> M26243391 10.1189/jlb.2MA1214-599R  
positive Expression: MAPK1 --> M27479182 10.1038/leu.2016.213  
positive Expression: MAPK1 --> M29311244 10.1128/IAI.00504-17  
positive Expression: MAPK1 --> M29311244 10.1128/IAI.00504-17  
positive Expression: MAPK1 --> M27169422 10.1007/82\_2016\_13  
positive Expression: MAPK1 --> M30150431 10.21873/invivo.11351  
positive Expression: MAPK1 --> M31337603 10.1016/j.ymthe.2019.06.014  
positive Expression: MAPK1 --> M32269717  
positive Expression: MAPK1 --> M32081857 10.1038/s41419-020-2344-0  
positive Expression: MAPK1 --> MCL1 10.1074/jbc.ra120.013364  
positive Expression: MAPK1 --> M33755101 10.1042/BCJ20210006  
positive Expression: MAPK1 --> M33926484 10.1186/s12967-021-02848-9  
positive Expression: MAPK1 --> M21979753 10.2119/molmed.2011.00164  
positive Expression: MAPK1 --> M21979753 10.2119/molmed.2011.00164  
positive Expression: MAPK1 --> M21219631 10.1186/1471-2407-11-7

positive Expression: MAPK1 --> M23088735 10.1186/1479-5876-10-211  
positive Expression: MAPK1 --> M23773282 10.1186/1475-2867-13-61  
positive Expression: MAPK1 --> M21637292 10.1038/cdd.2011.75  
positive Expression: MAPK1 --> M22064351 10.1038/leu.2011.287  
positive Expression: MAPK1 --> M21170021 10.1038/nchembio.496  
positive Expression: MAPK1 --> M21258408 10.1038/onc.2010.616  
positive Expression: MAPK1 --> M22761917 10.1371/journal.pone.0039870  
positive Expression: MAPK1 --> M22761917 10.1371/journal.pone.0039870  
positive Expression: MAPK1 --> M22761917 10.1371/journal.pone.0039870  
positive Expression: MAPK1 --> M24025415 10.4161/cbt.26341  
positive Expression: MAPK1 --> M23542173 10.1038/onc.2013.74  
positive Expression: MAPK1 --> M24556687 10.1038/cddis.2014.40  
positive Expression: MAPK1 --> M24096476 10.1038/onc.2013.389  
positive Expression: MAPK1 --> M24824212 10.1152/physiolgenomics.00173.2013  
positive Expression: MAPK1 --> M25275600 10.1038/cddis.2014.391  
positive Expression: MAPK1 --> M25879227 10.1371/journal.pone.0124407  
positive Expression: MAPK1 --> M21979753 10.2119/molmed.2011.0016410.2119/molmed.2011.  
positive Expression: MAPK1 --> M433 10.1016/j.blre.2017.08.004  
positive Expression: MAPK1 --> MCL1 10.1016/j.ymthe.2019.06.014  
positive Expression: MAPK1 --> MCL1 10.1189/jlb.2MA1214-599R  
positive Expression: MAPK1 --> MCL1 10.1128/IAI.00504-17  
positive Expression: MAPK1 --> MCL1 10.1128/IAI.00504-17  
positive Expression: MAPK1 --> MCL1 10.1016/j.ymthe.2019.06.014  
positive Expression: MAPK1 --> MCL1 10.1038/s41419-020-2344-0  
positive Expression: MAPK1 --> M10972974  
positive Expression: MAPK1 --> M25422792 10.1186/2162-3619-3-2710.1186/2162-3619-3-27  
positive Expression: MAPK1 --> M25986861 10.1016/j.bbamcr.2015.05.01410.1016/j.bbamcr.  
positive Expression: MAPK1 --> M27765849 10.1158/1535-7163.MCT-16-0017  
positive Expression: MAPK1 --> M28491825  
positive Expression: MAPK1 --> M28765329 10.1158/1078-0432.CCR-17-157410.1158/1078-043  
positive Expression: MAPK1 --> M17463001  
positive Expression: MAPK1 --> M17463001 10.1074/jbc.M610010200  
positive Expression: MAPK1 --> M29105654 10.1038/s41467-017-01477-5  
positive Expression: MAPK1 --> M22898329 10.1186/1750-2187-7-12  
positive Expression: MAPK1 --> M15291360 10.1080/10428190310001639470  
positive Expression: MAPK1 --> M20117835 10.1016/j.leukres.2009.07.013  
positive Expression: MAPK1 --> M19874848 10.1016/j.pharmthera.2009.10.001  
positive Expression: MAPK1 --> M23158473 10.1186/1476-4598-11-84  
positive Expression: MAPK1 --> M22179790 10.3892/ijo.2011.1303  
positive Expression: MAPK1 --> M22179790 10.3892/ijo.2011.1303  
positive Expression: MAPK1 --> M22179790 10.3892/ijo.2011.1303  
positive Expression: MAPK1 --> M19554262 10.1007/s10637-009-9281-1  
positive Expression: MAPK1 --> M23088735 10.1186/1479-5876-10-211  
positive Expression: MAPK1 --> M23696245 10.1124/mol.113.086140  
positive Expression: MAPK1 --> M22064351 10.1038/leu.2011.287  
positive Expression: MAPK1 --> M21996740 10.1038/onc.2011.424  
positive Expression: MAPK1 --> M24523919 10.1371/journal.pone.0088587  
positive Expression: MAPK1 --> M24594907 10.1371/journal.pone.0089064

positive Expression: MAPK1 --> M19554262 10.1007/s10637-009-9281-1  
 positive Expression: MAPK1 --> M23158473 10.1186/1476-4598-11-84  
 positive Expression: MAPK1 --> M26005182 10.1016/j.ijmm.2015.04.006  
 positive Expression: MAPK1 --> M16516835 10.1016/j.devcel.2006.01.002  
 positive Expression: MAPK1 --> M17014711  
 positive Expression: MAPK1 --> M10602518  
 positive Expression: MAPK1 --> M23158473 10.1186/1476-4598-11-84  
 positive Expression: MAPK1 --> M23773282 10.1186/1475-2867-13-61  
 positive Expression: MAPK1 --> M23056582 10.1371/journal.pone.0047060  
 positive Expression: MAPK1 --> M23678184 10.1128/JVI.00626-13  
 positive Expression: MAPK1 --> MCL1  
 positive Expression: MAPK1 --> M28765329 10.1158/1078-0432.CCR-17-157410.1158/1078-043  
 positive Expression: MAPK1 --> M29792376 10.1089/scd.2017.0287  
 positive Expression: MAPK1 --> M34741044 10.1038/s41419-021-04329-9  
 positive Expression: MAPK1 --> M34654885 10.1038/s41375-021-01443-7  
 positive Expression: MAPK1 --> M35218446 10.1007/s11033-022-07243-1  
 positive Expression: MAPK1 --> M35744993 10.3390/molecules27123865  
 positive Expression: MAPK1 --> M35725771 10.1038/s41375-022-01627-9  
 positive Expression: MAPK1 --> MCL1 10.1016/j.blre.2022.101036  
 positive Regulation: NGF --> CD:21501463 10.1186/1471-2164-12-19610.1186/1471-2164-12-  
 positive Regulation: NGF --> CD:22410557 10.1167/iov.11-843010.1167/iov.11-8430  
 Regulation: DST ---> RAC1 19403692  
 Regulation: DST ---> RAC1 19403692  
 Regulation: DST ---> RAC1 30059630 10.1146/annurev-cellbio-100617-062534  
 Regulation: DST ---> RAC1 22718344 10.1242/jcs.097600  
 Regulation: DST ---> RAC1 24357722 10.1242/jcs.128454  
 Regulation: DST ---> RAC1 19403692 10.1091/mbc.E09-01-005110.1091/mbc.E09-01-005  
 Regulation: DST ---> RAC1  
 negative Regulation: RAC1 ---| MC30013448 10.7150/ijms.25527  
 negative Regulation: RAC1 ---| MC31413255 10.1038/s41467-019-11490-5  
 negative Regulation: RAC1 ---| MCL1 10.1038/s41467-019-11490-5  
 positive Expression: SPP1 --> CI28830685 10.1016/j.yexpr.2017.08.028  
 positive Expression: SPP1 --> CI28830685 10.1016/j.yexpr.2017.08.028  
 positive Expression: SPP1 --> CI28830685 10.1016/j.yexpr.2017.08.028  
 positive Expression: SPP1 --> CI30902885 10.1136/gutjnl-2019-318419  
 positive Expression: SPP1 --> CI32236573 10.3892/ijo.2020.5035  
 positive Expression: SPP1 --> CI34178613 10.3389/fonc.2021.59285410.3389/fonc.2021.592  
 positive Expression: SPP1 --> CI34423566 10.1111/1759-7714.1410810.1111/1759-7714.1410  
 positive Expression: SPP1 --> CD274 10.1136/gutjnl-2019-318419  
 positive Expression: SPP1 --> CI28830685 10.1016/j.yexpr.2017.08.02810.1016/j.yexpr.20  
 positive Expression: SPP1 --> CI30206757 10.1007/s10620-018-5282-2

positive Expression: SPP1 --> CI28830685 10.1016/j.yexcr.2017.08.028  
 positive Expression: SPP1 --> CI28830685 10.1016/j.yexcr.2017.08.028  
 positive Expression: SPP1 --> CD274 10.1136/gutjnl-2019-318419  
 positive Expression: SPP1 --> CD274 10.1136/gutjnl-2019-318419  
 positive Expression: SPP1 --> CD274 10.1136/gutjnl-2019-318419  
 positive Expression: SPP1 --> CI36071302 10.1007/s12032-022-01801-0  
 positive Regulation: RAC1 --> hy29410394 10.12659/MSM.907468  
 positive QuantitativeChange: hypc29410394 10.12659/MSM.907468  
 positive QuantitativeChange: hypc29410394 10.12659/MSM.907468  
 Expression: NOTCH1 ---> PTEN 21035501 10.1016/j.advenzreg.2010.09.012  
 Expression: NOTCH1 ---> PTEN 18455982 10.1016/j.cell.2008.04.013  
 Expression: NOTCH1 ---> PTEN 20223597 10.1016/j.ctrv.2010.02.005  
 Expression: NOTCH1 ---> PTEN 10.1016/j.urolonc.2011.07.006  
 Expression: NOTCH1 ---> PTEN 10.1016/j.urolonc.2011.07.006  
 Expression: NOTCH1 ---> PTEN 10.1016/j.urolonc.2011.07.006  
 Expression: NOTCH1 ---> PTEN 18951834 10.1016/j.drug.2008.09.002  
 Expression: NOTCH1 ---> PTEN 22897852 10.1016/j.ccr.2012.06.014  
 Expression: NOTCH1 ---> PTEN 23348702 10.1016/j.canlet.2013.01.020  
 Expression: NOTCH1 ---> PTEN 24090996 10.1016/j.leukres.2013.09.007  
 Expression: NOTCH1 ---> PTEN 21993533 10.1016/j.urolonc.2011.07.006  
 Expression: NOTCH1 ---> PTEN 21993533 10.1016/j.urolonc.2011.07.006  
 Expression: NOTCH1 ---> PTEN 21993533 10.1016/j.urolonc.2011.07.006  
 Expression: NOTCH1 ---> PTEN 24780321 10.1016/j.lfs.2014.04.017  
 Expression: NOTCH1 ---> PTEN 26123366 10.1016/j.exphem.2015.05.017  
 Expression: NOTCH1 ---> PTEN 26683354 10.1016/j.cca.2015.12.010  
 Expression: NOTCH1 ---> PTEN 26505911 10.1016/j.exphem.2015.10.004  
 Expression: NOTCH1 ---> PTEN 26392376 10.1016/j.semcancer.2015.09.009  
 Expression: NOTCH1 ---> PTEN 18830414  
 Expression: NOTCH1 ---> PTEN 18830414  
 Expression: NOTCH1 ---> PTEN 20015880  
 Expression: NOTCH1 ---> PTEN 20015880  
 Expression: NOTCH1 ---> PTEN 19117948  
 Expression: NOTCH1 ---> PTEN 19117947  
 Expression: NOTCH1 ---> PTEN 27138341 10.1371/journal.pone.0154771  
 Expression: NOTCH1 ---> PTEN 27070592 10.3390/ijms17040531  
 Expression: NOTCH1 ---> PTEN 10.1172/JCI84637  
 Expression: NOTCH1 ---> PTEN 22623890 10.1100/2012/252457  
 Expression: NOTCH1 ---> PTEN 22074495 10.1186/1476-4598-10-138  
 Expression: NOTCH1 ---> PTEN 22074495 10.1186/1476-4598-10-138  
 Expression: NOTCH1 ---> PTEN 22074495 10.1186/1476-4598-10-138  
 Expression: NOTCH1 ---> PTEN 23634247  
 Expression: NOTCH1 ---> PTEN 21566651 10.1038/leu.2011.103  
 Expression: NOTCH1 ---> PTEN 21743488 10.1038/onc.2011.279  
 Expression: NOTCH1 ---> PTEN 22002304 10.1038/onc.2011.467  
 Expression: NOTCH1 ---> PTEN 22002304 10.1038/onc.2011.467



Expression: NOTCH1 ---> PTEN 22002304 10.1038/onc.2011.467  
 Expression: NOTCH1 ---> PTEN 23950991 10.1371/journal.pone.0070737  
 Expression: NOTCH1 ---> PTEN 24113181 10.1038/cddis.2013.375  
 Expression: NOTCH1 ---> PTEN 23699387 10.1095/biolreprod.113.108100  
 Expression: NOTCH1 ---> PTEN 24286423 10.3760/cma.j.issn.0366-6999.20130721  
 Expression: NOTCH1 ---> PTEN 24415757 10.1074/jbc.M113.519686  
 Expression: NOTCH1 ---> PTEN 24905788 10.1146/annurev-biochem-082411-113907  
 Expression: NOTCH1 ---> PTEN 24988225 10.1371/journal.pone.0101024  
 Expression: NOTCH1 ---> PTEN 25781910 10.1080/15384047.2015.1016662  
 Expression: NOTCH1 ---> PTEN 25043004 10.1038/nature13495  
 Expression: NOTCH1 ---> PTEN 26228240 10.1038/ncomms8935  
 Expression: NOTCH1 ---> PTEN 26228240 10.1038/ncomms8935  
 Expression: NOTCH1 ---> PTEN 26228240 10.1038/ncomms8935  
 Expression: NOTCH1 ---> PTEN 26491213 10.1155/2015/520590  
 Expression: NOTCH1 ---> PTEN 25781910 10.1080/15384047.2015.1016662  
 Expression: NOTCH1 ---> PTEN 10.1071/RD14212  
 Expression: NOTCH1 ---> PTEN 10.1071/RD14212  
 Expression: NOTCH1 ---> PTEN 17245125  
 Expression: NOTCH1 ---> PTEN 17245125  
 Expression: NOTCH1 ---> PTEN 17873882  
 Expression: NOTCH1 ---> PTEN 19479935 10.1002/jcb.22199  
 Expression: NOTCH1 ---> PTEN 19479935 10.1002/jcb.22199  
 Expression: NOTCH1 ---> PTEN 19479935 10.1002/jcb.22199  
 Expression: NOTCH1 ---> PTEN 21993533 10.1016/j.urolonc.2011.07.006  
 Expression: NOTCH1 ---> PTEN 24780321 10.1016/j.lfs.2014.04.017  
 Expression: NOTCH1 ---> PTEN 25110169 10.3892/ijmm.2014.1889  
 Expression: NOTCH1 ---> PTEN 28437168 10.1080/15384101.2017.1310351  
 Expression: NOTCH1 ---> PTEN 28627671 10.3892/mmr.2017.6791  
 Expression: NOTCH1 ---> PTEN 28603282 10.1038/cmi.2017.30  
 Expression: NOTCH1 ---> PTEN 29286063 10.3892/ijmm.2017.3319  
 Expression: NOTCH1 ---> PTEN 29496446 10.1016/j.bbrc.2018.02.18710.1016/j.bbrc.2018  
 Expression: NOTCH1 ---> PTEN 29496446 10.1016/j.bbrc.2018.02.18710.1016/j.bbrc.2018  
 Expression: NOTCH1 ---> PTEN 28951560 10.1038/leu.2017.301  
 Expression: NOTCH1 ---> PTEN 28951560 10.1038/leu.2017.301  
 Expression: NOTCH1 ---> PTEN 29532851 10.3892/ijmm.2018.3548  
 Expression: NOTCH1 ---> PTEN 417 10.1016/j.bbamcr.2018.07.006  
 Regulation: TP53 ---> RAC1 12750388  
 Regulation: TP53 ---> RAC1 12578823  
 Regulation: TP53 ---> RAC1 12578823  
 Regulation: TP53 ---> RAC1 14729984  
 Regulation: TP53 ---> RAC1 14729984  
 Regulation: TP53 ---> RAC1 14729984  
 Regulation: TP53 ---> RAC1 14729984

Regulation: TP53 ---> RAC1 22745590 10.1593/neo.12352  
 Regulation: TP53 ---> RAC1 21391906  
 Regulation: TP53 ---> RAC1 26036474 10.1124/jpet.115.223610  
 Regulation: TP53 ---> RAC1 12578823  
 Regulation: TP53 ---> RAC1 25771001 10.1016/j.biomaterials.2015.01.007  
 Regulation: TP53 ---> RAC1 12750388  
 Regulation: TP53 ---> RAC1  
 Regulation: KDM5B ---> PTEN 28958389 10.1016/j.trecan.2017.08.004  
 Regulation: KDM5B ---> PTEN 28958389 10.1016/j.trecan.2017.08.004  
 Regulation: KDM5B ---> PTEN 30628696 10.3892/mmr.2019.9832  
 Regulation: KDM5B ---> PTEN 25909289 10.18632/oncotarget.3713  
 Regulation: KDM5B ---> PTEN 1245 10.1016/j.trecan.2017.08.004  
 Regulation: KDM5B ---> PTEN 1245 10.1016/j.trecan.2017.08.004  
 Regulation: KDM5B ---> PTEN 10.3892/mmr.2019.9832  
 positive Regulation: CD274 --> ( 35818041 10.1186/s12885-022-09838-0  
 negative Expression: TP53 ---| GC11239498 10.1016/S0006-2952(00)00592-X  
 negative Expression: TP53 ---| GC24802641 10.1371/journal.pone.009646610.1371/journal.p  
 negative Expression: GCLC ---| TF24873722 10.1016/j.freeradbiomed.2014.05.017  
 positive Expression: AKT1 --> MC26436206 10.1016/j.bbrc.2015.09.182  
 positive Expression: AKT1 --> MC32184020 10.1016/j.bbrc.2020.02.165  
 positive Expression: AKT1 --> MC27095788 10.1182/blood-2015-10-675009  
 positive Expression: AKT1 --> MC20061561 10.1182/blood-2009-08-239244  
 positive Expression: AKT1 --> MC12637318 10.1182/blood-2002-11-3396  
 positive Expression: AKT1 --> MC12637318 10.1182/blood-2002-11-3396  
 positive Expression: AKT1 --> MC12637318 10.1182/blood-2002-11-3396  
 positive Expression: AKT1 --> MC20164468 10.1182/blood-2009-08-239483  
 positive Expression: AKT1 --> MC20940415 10.1182/blood-2010-04-189977  
 positive Expression: AKT1 --> MC29470962 10.1016/j.yexcr.2018.02.019  
 positive Expression: AKT1 --> MC11278698 10.1074/jbc.M010551200  
 positive Expression: AKT1 --> MC30782845 10.1074/jbc.RA118.006029  
 positive Expression: AKT1 --> MC28073911 10.1074/jbc.M116.755157  
 positive Expression: AKT1 --> MC23897826 10.1074/jbc.M113.475913  
 positive Expression: AKT1 --> MC17311912 10.1074/jbc.M700445200  
 positive Expression: AKT1 --> MC17545167 10.1074/jbc.M701663200  
 positive Expression: AKT1 --> MC16051596 10.1074/jbc.M508187200  
 positive Expression: AKT1 --> MC30213730 10.1016/j.taap.2018.09.008  
 positive Expression: AKT1 --> MC30055197 10.1016/j.antiviral.2018.07.015  
 positive Expression: AKT1 --> MC30439592 10.1016/j.ejmech.2018.11.001  
 positive Expression: AKT1 --> MC28987383 10.1016/j.canlet.2017.09.040  
 positive Expression: AKT1 --> MC29864454 10.1016/j.canlet.2018.05.048  
 positive Expression: AKT1 --> MC28934637 10.1016/j.ctrv.2017.08.012  
 positive Expression: AKT1 --> MC30476750 10.1016/j.ctrv.2018.11.001  
 positive Expression: AKT1 --> MC30236849 10.1016/j.biopha.2018.08.158  
 positive Expression: AKT1 --> MC32931746 10.1016/j.molcel.2020.08.017  
 positive Expression: AKT1 --> MC32931746 10.1016/j.molcel.2020.08.017  
 positive Expression: AKT1 --> MC33839456 10.1016/j.neo.2021.03.005  
 positive Expression: AKT1 --> MC29805077 10.1016/j.ccell.2018.05.001  
 positive Expression: AKT1 --> MC27601002 10.1016/j.clml.2016.08.008  
 positive Expression: AKT1 --> MC32898245 10.1182/bloodadvances.2019001393

positive Expression: AKT1 --> MC 19250631 10.1016/j.bbrc.2009.01.097  
positive Expression: AKT1 --> MC 19250643 10.1016/j.bbrc.2009.01.094  
positive Expression: AKT1 --> MC 15940637 10.1053/j.gastro.2005.03.010  
positive Expression: AKT1 --> MC 19428480 10.1016/j.dci.2009.02.007  
positive Expression: AKT1 --> MC 19874848 10.1016/j.pharmthera.2009.10.001  
positive Expression: AKT1 --> MC 21345578 10.1016/j.canlet.2011.01.012  
positive Expression: AKT1 --> MC 22343223 10.1016/j.canlet.2012.02.008  
positive Expression: AKT1 --> MC 11882383 10.1016/S0898-6568(01)00271-6  
positive Expression: AKT1 --> MC 16905331 10.1016/j.smim.2006.07.003  
positive Expression: AKT1 --> MC 23524145 10.1016/j.yexcr.2013.03.012  
positive Expression: AKT1 --> MC 25199984 10.1016/j.bbcan.2014.08.006  
positive Expression: AKT1 --> MC 25199984 10.1016/j.bbcan.2014.08.006  
positive Expression: AKT1 --> MC 25533111 10.1016/j.ymgme.2014.11.017  
positive Expression: AKT1 --> MC 19815839  
positive Expression: AKT1 --> MC 19815839  
positive Expression: AKT1 --> MC 17545167  
positive Expression: AKT1 --> MC 17014711  
positive Expression: AKT1 --> MC 16051596  
positive Expression: AKT1 --> MC 15967790  
positive Expression: AKT1 --> MC 12960271  
positive Expression: AKT1 --> MC 11278698  
positive Expression: AKT1 --> MC 19942932  
positive Expression: AKT1 --> MC 19407827  
positive Expression: AKT1 --> MC 19407827  
positive Expression: AKT1 --> MC 14767488  
positive Expression: AKT1 --> MC 12445202  
positive Expression: AKT1 --> MC 12445202  
positive Expression: AKT1 --> MC 34349823 10.1155/2021/5516655  
positive Expression: AKT1 --> MC 33469228 10.1038/s41418-020-00717-4  
positive Expression: AKT1 --> MC 32598308 10.1515/hmbci-2020-000910.1515/hmbci-2020-000  
positive Expression: AKT1 --> MC 18483303 10.1158/1535-7163.MCT-07-218310.1158/1535-716  
positive Expression: AKT1 --> MC 19457567 10.1016/j.jhep.2009.03.02410.1016/j.jhep.2009  
positive Expression: AKT1 --> MC 21670080 10.1158/0008-5472.CAN-10-453110.1158/0008-547  
positive Expression: AKT1 --> MC 30213730 10.1016/j.taap.2018.09.00810.1016/j.taap.2018  
positive Expression: AKT1 --> MC 32667864 10.1152/ajpcell.00181.2020  
positive Expression: AKT1 --> MCL1 10.1016/j.bbrc.2020.02.165  
positive Expression: AKT1 --> MCL1 10.1016/j.canlet.2011.01.012  
positive Expression: AKT1 --> MCL1 10.1016/j.canlet.2012.02.008  
positive Expression: AKT1 --> MC 11457886  
positive Expression: AKT1 --> MC 11457886  
positive Expression: AKT1 --> MC 12445202  
positive Expression: AKT1 --> MC 12445202

positive Expression: AKT1 --> MC 11593385  
positive Expression: AKT1 --> MC 11593385  
positive Expression: AKT1 --> MC 11314001  
positive Expression: AKT1 --> MC 11314001  
positive Expression: AKT1 --> MC 11314001  
positive Expression: AKT1 --> MCL1 10.1189/jlb.3A1114-537RR  
positive Expression: AKT1 --> MC 27431988 10.3892/ijo.2016.3624  
positive Expression: AKT1 --> MC 27479182 10.1038/leu.2016.213  
positive Expression: AKT1 --> MC 27460078 10.1007/s13277-016-5260-2  
positive Expression: AKT1 --> MCL1  
positive Expression: AKT1 --> MC 27465322 10.1007/s11596-016-1614-7  
positive Expression: AKT1 --> MC 27465322 10.1007/s11596-016-1614-7  
positive Expression: AKT1 --> MCL1 10.2174/1389450116666150825113035  
positive Expression: AKT1 --> MCL1 10.3390/ijms18061258  
positive Expression: AKT1 --> MC 28192408 10.1038/onc.2016.515  
positive Expression: AKT1 --> MC 29849119 10.1038/s41388-018-0345-6  
positive Expression: AKT1 --> MCL1  
positive Expression: AKT1 --> MCL1  
positive Expression: AKT1 --> MCL1 10.1007/978-981-13-7342-8\_5  
positive Expression: AKT1 --> MC 22680924  
positive Expression: AKT1 --> MC 23051914 10.4161/auto.22145  
positive Expression: AKT1 --> MC 23158473 10.1186/1476-4598-11-84  
positive Expression: AKT1 --> MC 23354006 10.3892/ijo.2013.1789  
positive Expression: AKT1 --> MC 21525012 10.1074/jbc.M110.207571  
positive Expression: AKT1 --> MC 23410153 10.2174/09298673113209990106  
positive Expression: AKT1 --> MC 23909734 10.1080/01635581.2013.802001  
positive Expression: AKT1 --> MC 23897826 10.1074/jbc.M113.475913  
positive Expression: AKT1 --> MC 23670294 10.1038/leu.2013.151  
positive Expression: AKT1 --> MC 23825534 10.1371/journal.pone.0066268  
positive Expression: AKT1 --> MC 24130723 10.1371/journal.pone.0075576  
positive Expression: AKT1 --> MC 24327018 10.1038/bjc.2013.754  
positive Expression: AKT1 --> MC 24327018 10.1038/bjc.2013.754  
positive Expression: AKT1 --> MC 24523919 10.1371/journal.pone.0088587  
positive Expression: AKT1 --> MC 23542173 10.1038/onc.2013.74  
positive Expression: AKT1 --> MC 24556687 10.1038/cdis.2014.40  
positive Expression: AKT1 --> MC 28192408 10.1038/onc.2016.515  
positive Expression: AKT1 --> MC 23354006 10.3892/ijo.2013.1789  
positive Expression: AKT1 --> MC 21773964 10.1055/s-0031-1280780  
positive Expression: AKT1 --> MC 24492287 10.1097/CAD.0000000000000081  
positive Expression: AKT1 --> MC 25032861 10.1038/cdis.2014.303  
positive Expression: AKT1 --> MC 25032861 10.1038/cdis.2014.303  
positive Expression: AKT1 --> MCL1 10.1189/jlb.1A0414-212R  
positive Expression: AKT1 --> MCL1 10.1189/jlb.1A0414-212R  
positive Expression: AKT1 --> MCL1 10.1172/JCI75821  
positive Expression: AKT1 --> MC 22252875 10.1128/IAI.05219-11  
positive Expression: AKT1 --> MC 22252875 10.1128/IAI.05219-11  
positive Expression: AKT1 --> MC 22252875 10.1128/IAI.05219-11  
positive Expression: AKT1 --> MC 24824212 10.1152/physiolgenomics.00173.2013  
positive Expression: AKT1 --> MC 25590803 10.1038/cdis.2014.525  
positive Expression: AKT1 --> MC 25275600 10.1038/cdis.2014.391  
positive Expression: AKT1 --> MCL1 10.1128/JVI.02879-15  
positive Expression: AKT1 --> MCL1 10.1128/JVI.02879-15  
positive Expression: AKT1 --> MC 26073081 10.1038/onc.2015.188  
positive Expression: AKT1 --> MC 15940637 10.1053/j.gastro.2005.03.010

positive Expression: AKT1 --> MC 23561469 10.1016/j.hoc.2013.01.002  
 positive Expression: AKT1 --> MC 19933775  
 positive Expression: AKT1 --> MC 19933775  
 positive Expression: AKT1 --> MC 19933775  
 positive Expression: AKT1 --> MC 18559346  
 positive Expression: AKT1 --> MC 17014711  
 positive Expression: AKT1 --> MC 16710358  
 positive Expression: AKT1 --> MC 11593385  
 positive Expression: AKT1 --> MCL1 10.2174/13816128113196660758  
 positive Expression: AKT1 --> MC 10454566  
 positive Expression: AKT1 --> MC 10961875  
 positive Expression: AKT1 --> MC 15940637  
 positive Expression: AKT1 --> MC 15940637  
 positive Expression: AKT1 --> MC 16327976  
 positive Expression: AKT1 --> MC 17009247  
 positive Expression: AKT1 --> MC 17928528  
 positive Expression: AKT1 --> MC 18483275 10.1158/0008-5472.CAN-07-6286  
 positive Expression: AKT1 --> MC 19523441 10.1016/j.bbrc.2009.05.149  
 positive Expression: AKT1 --> MC 19407827 10.1038/cdd.2009.38  
 positive Expression: AKT1 --> MC 23524145 10.1016/j.yexcr.2013.03.012  
 positive Expression: AKT1 --> MC 24859932 10.3892/or.2014.3218  
 positive Expression: AKT1 --> MCL1 10.1074/jbc.M115.713545  
 positive Expression: AKT1 --> MC 28192408 10.1038/onc.2016.51510.1038/onc.2016.515  
 positive Expression: AKT1 --> MCL1  
 positive Expression: AKT1 --> MC 29507660 10.18632/oncotarget.2292610.18632/oncotarget.  
 positive Expression: AKT1 --> MC 29652658  
 positive Expression: AKT1 --> MC 30213730 10.1016/j.taap.2018.09.00810.1016/j.taap.2018  
 positive Expression: AKT1 --> MC 30213730 10.1016/j.taap.2018.09.00810.1016/j.taap.2018  
 positive Expression: AKT1 --> MC 32305283 10.1016/j.taap.2020.11501310.1016/j.taap.2020  
 positive Expression: AKT1 --> MC 33132196 10.1016/j.yexcr.2020.11234310.1016/j.yexcr.20  
 positive Expression: AKT1 --> MC 33839456 10.1016/j.neo.2021.03.005  
 positive Expression: AKT1 --> MC 34360791 10.3390/ijms22158023  
 positive Expression: AKT1 --> MC 34715860 10.1186/s12935-021-02282-3  
 positive Expression: AKT1 --> MC 34654885 10.1038/s41375-021-01443-7  
 positive Expression: AKT1 --> MC 35136016 10.1038/s41419-022-04551-z  
 positive Expression: AKT1 --> MC 35315320 10.1016/j.exphem.2022.03.006  
 positive Expression: AKT1 --> MC 34528729 10.1002/JLB.2RU0221-088RRR  
 positive Expression: AKT1 --> MC 35218446 10.1007/s11033-022-07243-1  
 positive Expression: AKT1 --> MC 36180828 10.1186/s10020-022-00547-9  
 positive Expression: AKT1 --> MC 36243843 10.1007/978-3-031-06566-8\_6  
 positive Expression: AKT1 --> MC 36241868 10.1038/s41388-022-02482-9  
 negative PromoterBinding: TP53 -- 15047174 10.1016/j.bbrc.2004.03.029  
 negative PromoterBinding: TP53 -- 10792001 10.1172/JCI9290  
 negative PromoterBinding: TP53 -- 15548710 10.1158/0008-5472.CAN-04-1612  
 negative PromoterBinding: TP53 -- 12647018 10.1007/s00280-002-0551-2  
 negative PromoterBinding: TP53 -- 18528466  
 negative PromoterBinding: TP53 -- 22094098  
 negative PromoterBinding: TP53 -- 11483599 10.1074/jbc.M103429200  
 negative PromoterBinding: TP53 -- 14573776 10.1124/mol.64.5.1259  
 negative PromoterBinding: TP53 -- 22753715  
 negative PromoterBinding: TP53 -- 23969950 10.3892/or.2013.2671  
 negative PromoterBinding: TP53 ---| ABCC1 10.2174/0929867324666161118130238  
 negative PromoterBinding: TP53 -- 18528466  
 negative PromoterBinding: TP53 -- 14573776 10.1124/mol.64.5.1259

negative PromoterBinding: TP53 -- 14573776  
 negative PromoterBinding: TP53 -- 14573776 10.1124/mol.64.5.1259  
 negative PromoterBinding: TP53 -- 10792001 10.1172/JCI9290  
 negative PromoterBinding: TP53 ---| ABCC1  
 negative Expression: CCL3L1 ---| 34153005 10.1172/JCI148542  
 Expression: PTEN ---> BECN1 27107786 10.1016/j.toxlet.2016.04.015  
 Expression: PTEN ---> BECN1 27107786 10.1016/j.toxlet.2016.04.015  
 Expression: PTEN ---> BECN1 26218645 10.1080/15548627.2015.1074372  
 Expression: PTEN ---> BECN1 829 10.1016/j.cub.2017.02.015  
 Expression: PTEN ---> BECN1 23811268 10.1016/j.semcancer.2013.06.007  
 Expression: PTEN ---> BECN1 29412697 10.1089/cbr.2017.230610.1089/cbr.2017.2306  
 Regulation: PAX8-AS1 ---> PAX8 32293699 10.5603/EP.a2020.0021  
 Regulation: PAX8-AS1 ---> PAX8 27225188 10.1007/s00438-016-1217-910.1007/s00438-016-1  
 Regulation: PAX8-AS1 ---> PAX8 36248434 10.1155/2022/2295044  
 Regulation: CYP2J2 ---> MAPK1 22260463 10.1089/hum.2011.135  
 Regulation: CYP2J2 ---> MAPK1 22223859 10.1194/jlr.M017319  
 Regulation: CYP2J2 ---> MAPK1 23835530 10.3892/ijmm.2013.1435  
 Regulation: CYP2J2 ---> MAPK1 25389363 10.1152/ajpendo.00118.2014  
 negative PromoterBinding: PPARG -21247904 10.1074/jbc.M110.199612  
 negative PromoterBinding: PPARG -31277946 10.1016/j.bbrc.2019.06.16010.1016/j.bbrc.2019  
 negative PromoterBinding: PPARG -31277946 10.1016/j.bbrc.2019.06.16010.1016/j.bbrc.2019  
 negative PromoterBinding: PPARG -24569375 10.1172/JCI7058710.1172/JCI70587  
 negative PromoterBinding: PPARG -11861425 10.1161/hh0302.105098  
 negative PromoterBinding: PPARG -20460605 10.1152/physiolgenomics.00064.2010  
 negative PromoterBinding: PPARG -23447133 10.1152/ajpregu.00607.2012  
 negative PromoterBinding: PPARG ---| SPP1 10.1172/JCI70587  
 negative PromoterBinding: PPARG -21103061 10.1371/journal.pone.0013959  
 negative PromoterBinding: PPARG -11426586  
 negative PromoterBinding: PPARG ---| SPP1  
 negative PromoterBinding: PPARG ---| SPP1 10.1016/j.bbrc.2019.06.160  
 negative PromoterBinding: PPARG ---| SPP1 10.1016/j.bbrc.2019.06.160  
 negative PromoterBinding: PPARG -33834866 10.1152/AJPHEART.01009.2020  
 negative PromoterBinding: PPARG -34462564 10.1038/s41401-021-00756-810.1038/s41401-021-  
 negative PromoterBinding: PPARG -34462564 10.1038/s41401-021-00756-8  
 negative PromoterBinding: PPARG -34462564 10.1038/s41401-021-00756-8  
 Binding: SPP1 ---- PTEN 25035430 10.1074/jbc.M114.554519  
 Binding: SPP1 ---- PTEN 34181042 10.1007/s00262-021-02995-4  
 positive Expression: AKT1 --> GC29792861 10.1016/j.bbrc.2018.05.141  
 positive Expression: AKT1 --> GC17681938 10.1074/jbc.M701916200  
 positive Expression: AKT1 --> GC17681938 10.1074/jbc.M701916200  
 positive Expression: AKT1 --> GC26424114 10.1016/j.freeradiomed.2015.08.011  
 positive Expression: AKT1 --> GC20399244 10.1016/j.tox.2010.04.003  
 positive Expression: AKT1 --> GC19463904 10.1016/j.neuroscience.2009.05.025  
 positive Expression: AKT1 --> GC18926903 10.1016/j.freeradiomed.2008.09.013  
 positive Expression: AKT1 --> GC18926903 10.1016/j.freeradiomed.2008.09.013  
 positive Expression: AKT1 --> GC18926903 10.1016/j.freeradiomed.2008.09.013  
 positive Expression: AKT1 --> GC22995213 10.1016/j.bbagen.2012.09.008  
 positive Expression: AKT1 --> GC17681938  
 positive Expression: AKT1 --> GC17681938  
 positive Expression: AKT1 --> GC30805762 10.1007/s10565-019-09467-7  
 positive Expression: AKT1 --> GC30805762 10.1007/s10565-019-09467-7

positive Expression: AKT1 --> GC26324295 10.3892/ijmm.2015.2329  
positive Expression: AKT1 --> GC17109620 10.2174/156720206778792876  
positive Expression: AKT1 --> GC25195717 10.1016/j.ntt.2014.08.007  
positive Expression: AKT1 --> GC21560358  
positive Expression: AKT1 --> GC21728338 10.1021/tx200090n  
positive Expression: AKT1 --> GC25028796 10.3390/md12074214  
positive Expression: AKT1 --> GC35675271 10.1080/01635581.2022.2069274  
positive Regulation: PTGS2 --> F21525007 10.1074/jbc.M111.236398  
positive Regulation: PTGS2 --> F18208815 10.1074/jbc.M703318200  
positive Regulation: PTGS2 --> F30278282 10.1016/j.bioorg.2018.09.034  
positive Regulation: PTGS2 --> F15013132 10.1016/j.jacc.2003.08.048  
positive Regulation: PTGS2 --> F33662521 10.1016/j.alcohol.2020.08.007  
positive Regulation: PTGS2 --> F33662521 10.1016/j.alcohol.2020.08.007  
positive Regulation: PTGS2 --> F32559626 10.1016/j.biopha.2020.110388  
positive Regulation: PTGS2 --> F27376854 10.1016/j.intimp.2016.06.027  
positive Regulation: PTGS2 --> F27376854 10.1016/j.intimp.2016.06.027  
positive Regulation: PTGS2 --> F31026757 10.1016/j.pharep.2019.02.011  
positive Regulation: PTGS2 --> PPARG 10.1016/S0002-9440(10)64856-0  
positive Regulation: PTGS2 --> F16531147 10.1016/j.amjsurg.2005.11.009  
positive Regulation: PTGS2 --> F20026014 10.1016/j.brainres.2009.12.014  
positive Regulation: PTGS2 --> F20223456 10.1016/j.atherosclerosis.2010.02.003  
positive Regulation: PTGS2 --> F20538289 10.1016/j.jss.2010.03.011  
positive Regulation: PTGS2 --> F12269390 10.1016/S0024-3205(02)01510-2  
positive Regulation: PTGS2 --> F15629510 10.1016/j.jhep.2004.09.011  
positive Regulation: PTGS2 --> F16023763 10.1016/j.jhep.2005.02.032  
positive Regulation: PTGS2 --> F17561353 10.1016/j.psyneuen.2007.04.011  
positive Regulation: PTGS2 --> F19429187 10.1016/j.brainresbull.2009.02.006  
positive Regulation: PTGS2 --> F16443360 10.1016/j.jnutbio.2005.10.007  
positive Regulation: PTGS2 --> F23340376 10.1016/j.atherosclerosis.2012.12.007  
positive Regulation: PTGS2 --> F23340376 10.1016/j.atherosclerosis.2012.12.007  
positive Regulation: PTGS2 --> F25529449 10.1016/j.bbrc.2014.12.063  
positive Regulation: PTGS2 --> F25529449 10.1016/j.bbrc.2014.12.063  
positive Regulation: PTGS2 --> F18079203  
positive Regulation: PTGS2 --> F18208815  
positive Regulation: PTGS2 --> F12065695  
positive Regulation: PTGS2 --> F11861647  
positive Regulation: PTGS2 --> F17463321  
positive Regulation: PTGS2 --> F17463321

positive Regulation: PTGS2 --> F16385084  
positive Regulation: PTGS2 --> F27431935 10.3892/ijmm.2016.2674  
positive Regulation: PTGS2 --> F27339155 10.1007/s00421-016-3414-y  
positive Regulation: PTGS2 --> F28445238 10.1097/CCM.0000000000002440  
positive Regulation: PTGS2 --> F28445238 10.1097/CCM.0000000000002440  
positive Regulation: PTGS2 --> F28445238 10.1097/CCM.0000000000002440  
positive Regulation: PTGS2 --> F29928066 10.1371/journal.ppat.1007100  
positive Regulation: PTGS2 --> F31026757 10.1016/j.pharep.2019.02.011  
positive Regulation: PTGS2 --> F31063413 10.1139/cjpp-2018-0720  
positive Regulation: PTGS2 --> F31335352 10.1097/COC.0000000000000579  
positive Regulation: PTGS2 --> F31652556 10.3390/molecules24203801  
positive Regulation: PTGS2 --> F31519825 10.1523/JNEUROSCI.1249-19.2019  
positive Regulation: PTGS2 --> F33673390 10.3390/molecules26040985  
positive Regulation: PTGS2 --> F21443470  
positive Regulation: PTGS2 --> F21525007 10.1074/jbc.M111.236398  
positive Regulation: PTGS2 --> F23943857 10.1194/jlr.M042283  
positive Regulation: PTGS2 --> F25171731 10.1159/000365417  
positive Regulation: PTGS2 --> F25171731 10.1159/000365417  
positive Regulation: PTGS2 --> F27109015 10.3892/mmr.2016.5150  
positive Regulation: PTGS2 --> F15629510 10.1016/j.jhep.2004.09.011  
positive Regulation: PTGS2 --> F17463321 10.1161/01.RES.0000268411.49545.9c  
positive Regulation: PTGS2 --> F20159581 10.1016/j.jbiosc.2009.09.00310.1016/j.jbiosc.  
positive Regulation: PTGS2 --> F22138303 10.1016/j.bbalip.2011.11.00410.1016/j.bbalip.  
positive Regulation: PTGS2 --> F25171731 10.1159/00036541710.1159/000365417  
positive Regulation: PTGS2 --> F25529449 10.1016/j.bbrc.2014.12.06310.1016/j.bbrc.2014  
positive Regulation: PTGS2 --> F26863638 10.18632/oncotarget.721310.18632/oncotarget.7  
positive Regulation: PTGS2 --> F27376854 10.1016/j.intimp.2016.06.02710.1016/j.intimp.  
positive Regulation: PTGS2 --> F28445238 10.1097/CCM.000000000000244010.1097/CCM.00000  
positive Regulation: PTGS2 --> PPARG 10.1523/JNEUROSCI.1249-19.2019  
positive Regulation: PTGS2 --> PPARG 10.1097/CCM.0000000000002440  
positive Regulation: PTGS2 --> PPARG 10.1097/CCM.0000000000002440  
positive Regulation: PTGS2 --> PPARG 10.1097/CCM.0000000000002440  
positive Regulation: PTGS2 --> PPARG 10.1097/COC.0000000000000579  
positive Regulation: PTGS2 --> PPARG 10.3390/molecules24203801  
positive Regulation: PTGS2 --> F28445238 10.1097/CCM.000000000000244010.1097/CCM.00000  
positive Regulation: PTGS2 --> F15876425 10.1016/j.bcp.2005.03.024  
positive Regulation: PTGS2 --> F23340376 10.1016/j.atherosclerosis.2012.12.007  
positive Regulation: PTGS2 --> F18208815  
positive Regulation: PTGS2 --> F11861647  
positive Regulation: PTGS2 --> F24906289 10.1007/s00441-014-1920-y  
positive Regulation: PTGS2 --> F14555539  
positive Regulation: PTGS2 --> F15266333  
positive Regulation: PTGS2 --> F17459764  
positive Regulation: PTGS2 --> PPARG  
positive Regulation: PTGS2 --> F36456159 10.21873/anticanres.16084  
positive Regulation: PTGS2 --> F36456159 10.21873/anticanres.16084  
negative PromoterBinding: PPARG -19684609 10.1038/aps.2009.119  
negative PromoterBinding: PPARG -14636669 10.1016/S0163-7827(03)00037-7  
negative PromoterBinding: PPARG -20656057 10.1016/j.bbalip.2010.07.004  
negative PromoterBinding: PPARG -18055759 10.1124/mol.107.042002  
negative PromoterBinding: PPARG -21333731 10.1016/j.tiv.2011.02.004  
negative PromoterBinding: PPARG -16374840 10.1002/hep.20994  
negative PromoterBinding: PPARG -20554962 10.4049/jimmunol.1000866  
negative PromoterBinding: PPARG -16417216 10.1038/sj.jid.5700028



negative PromoterBinding: PPARG -19578162 10.1194/jlr.M900255-JLR200  
negative PromoterBinding: PPARG -17669705 10.1016/j.bone.2007.06.017  
negative PromoterBinding: PPARG -16443360 10.1016/j.jnutbio.2005.10.007  
negative PromoterBinding: PPARG -17316818 10.1016/j.plipres.2007.01.001  
negative PromoterBinding: PPARG -15741054 10.1016/j.jnutbio.2004.11.001  
negative PromoterBinding: PPARG -16303334 10.1016/j.clim.2005.09.018  
negative PromoterBinding: PPARG -18362203  
negative PromoterBinding: PPARG -14645533  
negative PromoterBinding: PPARG -20635307 10.1055/s-0030-1250111  
negative PromoterBinding: PPARG -23365414 10.1095/biolreprod.112.107383  
negative PromoterBinding: PPARG -24403546 10.1095/biolreprod.113.109223  
negative PromoterBinding: PPARG -16443360 10.1016/j.jnutbio.2005.10.007  
negative PromoterBinding: PPARG ---| PTGS2 10.1016/j.jnutbio.2004.11.001  
negative PromoterBinding: PPARG -19684609 10.1038/aps.2009.119  
negative PromoterBinding: PPARG -20656057 10.1016/j.bbalip.2010.07.004  
negative PromoterBinding: PPARG -18055759 10.1124/mol.107.042002  
negative PromoterBinding: PPARG -21333731 10.1016/j.tiv.2011.02.004  
negative PromoterBinding: PPARG -16374840 10.1002/hep.20994  
negative PromoterBinding: PPARG -20554962 10.4049/jimmunol.1000866  
negative PromoterBinding: PPARG -16417216 10.1038/sj.jid.5700028  
negative PromoterBinding: PPARG -19578162 10.1194/jlr.M900255-JLR200  
negative PromoterBinding: PPARG -17669705 10.1016/j.bone.2007.06.017  
positive Regulation: PTEN --> cf 24434152 10.1016/j.bbrc.2014.01.014  
positive Regulation: PTEN --> cf 11729185 10.1074/jbc.M108302200  
positive Regulation: PTEN --> cf 11495901 10.1074/jbc.M103632200  
positive Regulation: PTEN --> cf 27721020 10.1016/j.canlet.2016.10.003  
positive Regulation: PTEN --> cf 33220333 10.1016/j.canlet.2020.11.016  
positive Regulation: PTEN --> cf 32827577 10.1016/j.bbcan.2020.188405  
positive Regulation: PTEN --> cf 28755993 10.1016/j.ijpharm.2017.07.056  
positive Regulation: PTEN --> cf 21187093 10.1016/j.febslet.2010.12.027  
positive Regulation: PTEN --> cf 22465665 10.1016/j.febslet.2012.03.006  
positive Regulation: PTEN --> cf 16545436 10.1016/j.ygyno.2005.12.033  
positive Regulation: PTEN --> cf 15072831 10.1016/j.canlet.2003.10.028  
positive Regulation: PTEN --> cf 15072831 10.1016/j.canlet.2003.10.028  
positive Regulation: PTEN --> cf 23920276 10.1016/j.phymed.2013.07.002  
positive Regulation: PTEN --> cf 25744176 10.1016/j.drudis.2015.02.011  
positive Regulation: PTEN --> cf 21108789  
positive Regulation: PTEN --> cf 21108789  
positive Regulation: PTEN --> cf 19299556  
positive Regulation: PTEN --> cf 11729185  
positive Regulation: PTEN --> cf 11495901  
positive Regulation: PTEN --> cf 18458673  
positive Regulation: PTEN --> cf 16404430  
positive Regulation: PTEN --> cf 11103942  
positive Regulation: PTEN --> cf 28887606 10.1007/s10616-017-0134-z  
positive Regulation: PTEN --> cf 30616477 10.1177/0300060518819606  
positive Regulation: PTEN --> cf 33076450 10.3390/ijms21207633  
positive Regulation: PTEN --> cf 33721218 10.1007/s13577-021-00519-x

positive Regulation: PTEN --> cf 33721218 10.1007/s13577-021-00519-x  
 positive Regulation: PTEN --> cf 33721218 10.1007/s13577-021-00519-x  
 positive Regulation: PTEN --> cf 33721218 10.1007/s13577-021-00519-x  
 positive Regulation: PTEN --> cf 33721218 10.1007/s13577-021-00519-x  
 positive Regulation: PTEN --> cf 21108789 10.1186/1476-4598-9-305  
 positive Regulation: PTEN --> cf 21108789 10.1186/1476-4598-9-305  
 positive Regulation: PTEN --> cf 20736773 10.1097/PGP.0b013e3181de3068  
 positive Regulation: PTEN --> cf 26043084 10.1371/journal.pone.0128886  
 positive Regulation: PTEN --> cf 11103942 10.1038/sj.onc.1203918  
 positive Regulation: PTEN --> cf 16404430 10.1038/sj.bjc.6602926  
 positive Regulation: PTEN --> cf 16438844  
 positive Regulation: PTEN --> cf 21820606 10.1016/j.arcmed.2011.06.00810.1016/j.arcmed.  
 positive Regulation: PTEN --> cf 28686971 10.1016/j.biopha.2017.06.08910.1016/j.biopha.  
 positive Regulation: PTEN --> cf 30925916 10.1186/s13046-019-1119-x10.1186/s13046-019-1  
 positive Regulation: PTEN --> cf 33721218 10.1007/s13577-021-00519-x10.1007/s13577-021-  
 positive Regulation: PTEN --> chemosensit10.1016/j.febslet.2012.03.006  
 positive Regulation: PTEN --> chemosensit10.1177/0300060518819606  
 positive Regulation: PTEN --> cf 27147467 10.1007/s00018-016-2253-7  
 positive Regulation: PTEN --> cf 22781804  
 positive Regulation: PTEN --> cf 27955382  
 positive Regulation: PTEN --> chemosensit10.1042/BSR20180773  
 positive Regulation: PTEN --> cf 34681603 10.3390/ijms222010944  
 Regulation: ABCC1 ---> GCLC 21728338 10.1021/tx200090n  
 Regulation: ABCC1 ---> GCLC 21728338 10.1021/tx200090n  
 positive PromoterBinding: PHF20 -22334668 10.1074/jbc.M111.333922  
 positive PromoterBinding: PHF20 -32555448 10.1038/s41418-020-0580-6  
 negative Expression: PPARG ---| 136624108 10.1038/s41598-022-25737-7  
 negative Expression: TNFAIP8L2 --29568863 10.3892/mmr.2018.8789  
 negative Expression: TNFAIP8L2 --29568863 10.3892/mmr.2018.8789  
 Regulation: PTEN ---> RAC1 12393431 10.1182/blood-2002-04-1251  
 Regulation: PTEN ---> RAC1 23806663 10.1016/j.bbamcr.2013.06.009  
 Regulation: PTEN ---> RAC1 10.1016/j.ijdevneu.2008.09.171  
 Regulation: PTEN ---> RAC1 15246683 10.1016/j.bbamcr.2004.04.010  
 Regulation: PTEN ---> RAC1 21943825 10.1016/j.canlet.2011.08.023  
 Regulation: PTEN ---> RAC1 10.1016/S0955-0674(00)00105-8  
 Regulation: PTEN ---> RAC1 10.1016/S0955-0674(00)00105-8  
 Regulation: PTEN ---> RAC1 17560336 10.1016/j.ccr.2007.04.021  
 Regulation: PTEN ---> RAC1 22995297 10.1016/j.bbrc.2012.09.025  
 Regulation: PTEN ---> RAC1 23000914 10.1016/j.bcp.2012.09.008  
 Regulation: PTEN ---> RAC1 23993968 10.1016/j.cellsig.2013.08.017  
 Regulation: PTEN ---> RAC1 19864456  
 Regulation: PTEN ---> RAC1 12960424  
 Regulation: PTEN ---> RAC1 16341149  
 Regulation: PTEN ---> RAC1 16341149  
 Regulation: PTEN ---> RAC1 19940030  
 Regulation: PTEN ---> RAC1 26166433 10.1038/ncomms8721

Regulation: PTEN ---> RAC1 26166433 10.1038/ncomms8721  
 Regulation: PTEN ---> RAC1 26166433 10.1038/ncomms8721  
 Regulation: PTEN ---> RAC1 26166433 10.1038/ncomms8721  
 Regulation: PTEN ---> RAC1 27033067 10.1007/978-1-4939-3299-3\_2  
 Regulation: PTEN ---> RAC1 28710285 10.1042/BST20160269  
 Regulation: PTEN ---> RAC1 29361670 10.1152/ajprenal.00575.2017  
 Regulation: PTEN ---> RAC1 31481407 10.1128/IAI.00553-19  
 Regulation: PTEN ---> RAC1 22745590 10.1593/neo.12352  
 Regulation: PTEN ---> RAC1 23755300 10.1371/journal.pone.0066209  
 Regulation: PTEN ---> RAC1 23755300 10.1371/journal.pone.0066209  
 Regulation: PTEN ---> RAC1 23755300 10.1371/journal.pone.0066209  
 Regulation: PTEN ---> RAC1 24523903 10.1371/journal.pone.0088489  
 Regulation: PTEN ---> RAC1 24823941 10.1194/jlr.M048207  
 Regulation: PTEN ---> RAC1 10753747 10.1016/s0960-9822(00)00417-6  
 Regulation: PTEN ---> RAC1 10753747 10.1016/s0960-9822(00)00417-6  
 Regulation: PTEN ---> RAC1 19864456 10.1091/mbc.E09-08-069210.1091/mbc.e09-08-069  
 Regulation: PTEN ---> RAC1 23806663 10.1016/j.bbamcr.2013.06.00910.1016/j.bbamcr.  
 Regulation: PTEN ---> RAC1 29872505 10.18632/oncotarget.2534910.18632/oncotarget.  
 Regulation: PTEN ---> RAC1 34480897 10.1016/j.jbc.2021.101161  
 Regulation: PTEN ---> RAC1 17535963  
 Regulation: PTEN ---> RAC1 10.1042/BST20160269  
 Regulation: PTEN ---> RAC1 28642362 10.1083/jcb.201610102  
 Regulation: PTEN ---> RAC1 10.1128/IAI.00553-19  
 Regulation: PTEN ---> RAC1 16973299 10.1016/j.neuroscience.2006.07.049  
 Regulation: PTEN ---> RAC1 25829446 10.1126/scisignal.200584010.1126/scisignal.20  
 Regulation: PTEN ---> RAC1 25829446 10.1126/scisignal.200584010.1126/scisignal.20  
 Regulation: PTEN ---> RAC1  
 positive Regulation: PAX8-AS1 ---> 29693272 10.1002/jcb.2688110.1002/jcb.26881  
 positive Expression: PTEN --> BF27107786 10.1016/j.toxlet.2016.04.015  
 positive Expression: PTEN --> BF27107786 10.1016/j.toxlet.2016.04.015  
 positive Expression: PTEN --> BF29412697 10.1089/cbr.2017.2306  
 positive Expression: PTEN --> BF29412697 10.1089/cbr.2017.2306  
 positive Expression: PTEN --> BF30875347 10.1097/CAD.00000000000000724  
 positive Expression: PTEN --> BF26218645 10.1080/15548627.2015.1074372  
 positive Expression: PTEN --> BF29361670 10.1152/ajprenal.00575.2017  
 positive Expression: PTEN --> BF23811268 10.1016/j.semancer.2013.06.007  
 positive Expression: PTEN --> BECN1 10.1097/CAD.00000000000000724  
 positive Expression: PTEN --> BF29412697 10.1089/cbr.2017.230610.1089/cbr.2017.2306  
 positive Expression: PTEN --> BF829 10.1016/j.cub.2017.02.015  
 positive Expression: PTEN --> BF35647006 10.3389/fsurg.2022.767611  
 Regulation: MAPK1 ---> PRR5L 22609986 10.1038/ncb2507  
 Regulation: MAPK1 ---> PRR5L 22609986 10.1038/ncb2507  
 Binding: PPARG ---- GPER1 31741264 10.1007/s11033-019-05196-6  
 Binding: PPARG ---- GPER1 10.1007/s11033-019-05196-6  
 positive QuantitativeChange: hypc 31620898 10.1007/s00432-019-03047-210.1007/s00432-019-  
 Regulation: PPARG ---> PAX8 19041825 10.1016/j.beem.2008.09.017  
 Regulation: PPARG ---> PAX8 10.1016/j.path.2013.10.001  
 Regulation: PPARG ---> PAX8 16179407  
 Regulation: PPARG ---> PAX8 12161538  
 Regulation: RBP1 ---> PPARG 20498279 10.1128/MCB.00014-1010.1128/MCB.00014-10  
 negative Expression: GCLC ---| AF9813007  
 positive Regulation: CD274 --> N36266281 10.1038/s41467-022-33739-2  
 positive Regulation: CD274 --> N36266281 10.1038/s41467-022-33739-2  
 positive Expression: MAPK1 --> C29066411 10.1016/j.fct.2017.10.033

positive Expression: MAPK1 --> GCLC 10.1016/S0006-291X(02)00816-1  
 positive Expression: MAPK1 --> (19328227 10.1016/j.freeradbiomed.2009.03.016  
 positive Expression: MAPK1 --> (19328227 10.1016/j.freeradbiomed.2009.03.016  
 positive Expression: MAPK1 --> (19328227 10.1016/j.freeradbiomed.2009.03.016  
 positive Expression: MAPK1 --> (25201354 10.1016/j.tox.2014.09.002  
 positive Expression: MAPK1 --> (26424114 10.1016/j.freeradbiomed.2015.08.011  
 positive Expression: MAPK1 --> (22864849 10.1007/s00204-012-0913-4  
 positive Expression: MAPK1 --> (26424114 10.1016/j.freeradbiomed.2015.08.01110.1016/j.  
 positive Expression: MAPK1 --> (15477009 10.1016/j.freeradbiomed.2004.07.021  
 positive Expression: MAPK1 --> (15683710 10.1016/j.freeradbiomed.2004.11.012  
 positive Expression: MAPK1 --> (18691715 10.1016/j.atherosclerosis.2008.06.024  
 positive Expression: MAPK1 --> (20399244 10.1016/j.tox.2010.04.003  
 positive Expression: MAPK1 --> (12147223  
 positive Expression: MAPK1 --> GCLC  
 Regulation: STC2 ---> MAPK1 25816401 10.1177/0394632015572745  
 Regulation: STC2 ---> MAPK1 23187001 10.5483/bmbrep.2012.45.11.086  
 Regulation: STC2 ---> MAPK1 27878259 10.3892/mmr.2016.595110.3892/mmr.2016.5951  
 Regulation: STC2 ---> MAPK1 27878259 10.3892/mmr.2016.595110.3892/mmr.2016.5951  
 Regulation: STC2 ---> MAPK1 31162839 10.1002/ijc.3248710.1002/ijc.32487  
 Regulation: STC2 ---> MAPK1 35501821 10.1186/s13046-022-02370-w  
 MolTransport: CYP2J2 ---> AKT1 28554983 10.1194/jlr.M074229  
 MolTransport: CYP2J2 ---> AKT1 27416746 10.1111/ace1.1250710.1111/ace1.12507  
 MolTransport: CYP2J2 ---> AKT1 34639055 10.3390/ijms221910714  
 MolTransport: CYP2J2 ---> AKT1 25245389 10.1161/HYPERTENSIONAHA.114.0388410.1161/HYPE  
 MolTransport: CYP2J2 ---> AKT1 23041291 10.1016/j.prostaglandins.2012.09.00410.1016/j  
 MolTransport: CYP2J2 ---> AKT1 26859195 10.1097/FJC.0000000000000371  
 MolTransport: CYP2J2 ---> AKT1 22223859 10.1194/jlr.M017319  
 MolTransport: CYP2J2 ---> AKT1 22223859 10.1194/jlr.M017319  
 MolTransport: CYP2J2 ---> AKT1 22223859 10.1194/jlr.M017319  
 Regulation: NET1 ---> AKT1 29769144 10.1186/s13058-018-0966-2  
 Regulation: NET1 ---> AKT1 32393835 10.1038/s41388-020-1315-3  
 Regulation: NET1 ---> AKT1 33839702 10.18632/aging.202845  
 Regulation: NET1 ---> AKT1 33839702 10.18632/aging.202845  
 Regulation: NET1 ---> AKT1 33839702 10.18632/aging.20284510.18632/aging.202845  
 Regulation: TP53 ---> BECN1 30529040 10.1016/j.pharmthera.2018.12.005  
 Regulation: TP53 ---> BECN1 10.1016/j.virusres.2012.03.010  
 Regulation: TP53 ---> BECN1 22472731 10.1016/j.virusres.2012.03.010  
 Regulation: TP53 ---> BECN1 25010388 10.1016/j.mam.2014.05.001  
 Regulation: TP53 ---> BECN1 27118659 10.1016/j.molonc.2016.04.001  
 Regulation: TP53 ---> BECN1 29417176 10.1007/s00018-018-2759-2  
 Regulation: TP53 ---> BECN1 29976630 10.21873/cgp.20083  
 Regulation: TP53 ---> BECN1 30089855 10.1038/s41374-018-0099-3  
 Regulation: TP53 ---> BECN1 29991800 10.1038/s41388-018-0395-9  
 Regulation: TP53 ---> BECN1 10.1152/ajpcell.00261.2018  
 Regulation: TP53 ---> BECN1 23233667 10.1074/jbc.M112.390245  
 Regulation: TP53 ---> BECN1 21178393 10.4161/cbt.11.2.14627  
 Regulation: TP53 ---> BECN1 23208502 10.1038/onc.2012.556  
 Regulation: TP53 ---> BECN1 24937773 10.2119/molmed.2014.00063  
 Regulation: TP53 ---> BECN1 22345153 10.1158/0008-5472.CAN-11-229110.1158/0008-547  
 Regulation: TP53 ---> BECN1 24841907 10.1021/jf500903g10.1021/jf500903g  
 Regulation: TP53 ---> BECN1 25208472 10.1111/jcmm.1238610.1111/jcmm.12386  
 Regulation: TP53 ---> BECN1 30807795 10.1016/j.neulet.2019.02.03610.1016/j.neulet.  
 Regulation: TP53 ---> BECN1 10.1172/JCI135536  
 Regulation: TP53 ---> BECN1 25584615 10.3390/ijms16011544

Regulation: TP53 ---> BECN1 25198662 10.3727/096504014X1402416045908710.3727/09650  
Regulation: TP53 ---> BECN1 21765470 10.1038/onc.2011.295  
Regulation: TP53 ---> BECN1  
Regulation: TP53 ---> BECN1 33297472 10.3390/ijms21239325  
Regulation: TP53 ---> BECN1 33556475 10.1016/j.matbio.2021.02.001  
Regulation: TP53 ---> BECN1 34119535 10.1016/j.mvr.2021.10420710.1016/j.mvr.2021.1  
Regulation: TP53 ---> BECN1 34236569 10.1007/s10495-021-01682-0  
positive Expression: MAPK1 --> F28363868 10.1016/j.bbrc.2017.03.152  
positive Expression: MAPK1 --> F28288820 10.1016/j.bcp.2017.03.003  
positive Expression: MAPK1 --> F31377156 10.1016/j.ejphar.2019.172586  
positive Expression: MAPK1 --> F19531467 10.1074/jbc.M109.028084  
positive Expression: MAPK1 --> F19531467 10.1074/jbc.M109.028084  
positive Expression: MAPK1 --> F10722727 10.1074/jbc.275.12.8817  
positive Expression: MAPK1 --> F10671533 10.1074/jbc.275.7.4949  
positive Expression: MAPK1 --> F10652293 10.1074/jbc.275.5.3107  
positive Expression: MAPK1 --> F15496409 10.1074/jbc.M409885200  
positive Expression: MAPK1 --> F15496409 10.1074/jbc.M409885200  
positive Expression: MAPK1 --> F18519570 10.1074/jbc.M800263200  
positive Expression: MAPK1 --> F10930430 10.1074/jbc.M910237199  
positive Expression: MAPK1 --> F10930430 10.1074/jbc.M910237199  
positive Expression: MAPK1 --> F10930430 10.1074/jbc.M910237199  
positive Expression: MAPK1 --> F16371352 10.1074/jbc.M512722200  
positive Expression: MAPK1 --> F18854308 10.1074/jbc.M806322200  
positive Expression: MAPK1 --> F16618699 10.1074/jbc.M600861200  
positive Expression: MAPK1 --> F18208815 10.1074/jbc.M703318200  
positive Expression: MAPK1 --> F22879597 10.1074/jbc.M112.385542  
positive Expression: MAPK1 --> F15007072 10.1074/jbc.M311279200  
positive Expression: MAPK1 --> F18534982 10.1074/jbc.M800524200  
positive Expression: MAPK1 --> F15525649 10.1074/jbc.M408172200  
positive Expression: MAPK1 --> F11292836 10.1074/jbc.M101801200  
positive Expression: MAPK1 --> F11292836 10.1074/jbc.M101801200  
positive Expression: MAPK1 --> F11292836 10.1074/jbc.M101801200  
positive Expression: MAPK1 --> F20018844 10.1074/jbc.M109.032672  
positive Expression: MAPK1 --> F12907684 10.1074/jbc.M304887200  
positive Expression: MAPK1 --> F12902324 10.1074/jbc.M306280200  
positive Expression: MAPK1 --> F12902324 10.1074/jbc.M306280200  
positive Expression: MAPK1 --> F12902324 10.1074/jbc.M306280200  
positive Expression: MAPK1 --> F12796504 10.1074/jbc.M300625200  
positive Expression: MAPK1 --> F12796504 10.1074/jbc.M300625200  
positive Expression: MAPK1 --> F12796504 10.1074/jbc.M300625200  
positive Expression: MAPK1 --> F11901151 10.1074/jbc.M111415200  
positive Expression: MAPK1 --> F12695520 10.1074/jbc.M302076200  
positive Expression: MAPK1 --> F12695520 10.1074/jbc.M302076200  
positive Expression: MAPK1 --> F12695520 10.1074/jbc.M302076200  
positive Expression: MAPK1 --> F10969080 10.1074/jbc.M006168200  
positive Expression: MAPK1 --> F10930401 10.1074/jbc.M002324200

positive Expression: MAPK1 --> F10930401 10.1074/jbc.M002324200  
positive Expression: MAPK1 --> F10930401 10.1074/jbc.M002324200  
positive Expression: MAPK1 --> F31326176 10.3168/jds.2018-15774  
positive Expression: MAPK1 --> F22766885 10.1194/jlr.D029546  
positive Expression: MAPK1 --> F22766885 10.1194/jlr.D029546  
positive Expression: MAPK1 --> F30017554 10.1016/j.jaci.2018.06.033  
positive Expression: MAPK1 --> F33126082 10.1016/j.molimm.2020.10.008  
positive Expression: MAPK1 --> F20691240 10.1016/j.fct.2010.07.046  
positive Expression: MAPK1 --> F29331731 10.1016/j.fct.2018.01.013  
positive Expression: MAPK1 --> F31336132 10.1016/j.fct.2019.110693  
positive Expression: MAPK1 --> F31883986 10.1016/j.fct.2019.111092  
positive Expression: MAPK1 --> F31030852 10.1016/j.vetmic.2019.03.005  
positive Expression: MAPK1 --> F31030852 10.1016/j.vetmic.2019.03.005  
positive Expression: MAPK1 --> F31030852 10.1016/j.vetmic.2019.03.005  
positive Expression: MAPK1 --> F29609010 10.1016/j.jep.2018.03.037  
positive Expression: MAPK1 --> F28095354 10.1016/j.biopha.2017.01.041  
positive Expression: MAPK1 --> F30316005 10.1016/j.micpath.2018.10.008  
positive Expression: MAPK1 --> F26453923 10.1016/j.freeradbiomed.2015.08.023  
positive Expression: MAPK1 --> F28647573 10.1016/j.cellsig.2017.06.012  
positive Expression: MAPK1 --> F27343699 10.1016/j.phrs.2016.06.022  
positive Expression: MAPK1 --> F31546014 10.1016/j.phrs.2019.104446  
positive Expression: MAPK1 --> F32707231 10.1016/j.phrs.2020.105090  
positive Expression: MAPK1 --> F28899709 10.1016/j.pupt.2017.09.002  
positive Expression: MAPK1 --> F28282576 10.1016/j.intimp.2017.03.003  
positive Expression: MAPK1 --> F28666238 10.1016/j.intimp.2017.06.022  
positive Expression: MAPK1 --> F29310107 10.1016/j.intimp.2018.01.001  
positive Expression: MAPK1 --> F26110105 10.1016/j.fob.2015.06.001  
positive Expression: MAPK1 --> F26110105 10.1016/j.fob.2015.06.001  
positive Expression: MAPK1 --> PTGS2 10.1016/j.genrep.2020.100972  
positive Expression: MAPK1 --> F16796978 10.1016/j.ajog.2006.05.014  
positive Expression: MAPK1 --> F17071582 10.2353/ajpath.2006.060178  
positive Expression: MAPK1 --> F21356386 10.1016/j.ajpath.2010.11.074  
positive Expression: MAPK1 --> F17313938 10.1016/j.abb.2007.01.009  
positive Expression: MAPK1 --> F22591774 10.1016/j.archoralbio.2012.04.015  
positive Expression: MAPK1 --> F12220506 10.1016/S0006-291X(02)02124-1  
positive Expression: MAPK1 --> F12901876 10.1016/S0006-291X(03)01393-7  
positive Expression: MAPK1 --> F15325243 10.1016/j.bbrc.2004.07.129  
positive Expression: MAPK1 --> F16527254 10.1016/j.bbrc.2006.02.116  
positive Expression: MAPK1 --> F16930556 10.1016/j.bbrc.2006.07.214  
positive Expression: MAPK1 --> F17097611 10.1016/j.bbrc.2006.10.098  
positive Expression: MAPK1 --> F17222389 10.1016/j.bbrc.2006.12.174  
positive Expression: MAPK1 --> F17222389 10.1016/j.bbrc.2006.12.174  
positive Expression: MAPK1 --> F19319478 10.1007/s00011-009-0030-x10.1007/s00011-009-0  
positive Expression: MAPK1 --> F19327173 10.1186/ar266110.1186/ar2661  
positive Expression: MAPK1 --> F19808956 10.1158/0008-5472.CAN-09-231610.1158/0008-547  
positive Expression: MAPK1 --> F23474920 10.1007/s00011-013-0609-010.1007/s00011-013-0  
positive Expression: MAPK1 --> F23524589 10.1161/CIRCRESAHA.112.28039910.1161/CIRCRESA  
positive Expression: MAPK1 --> F24348809 10.3892/etm.2013.1394  
positive Expression: MAPK1 --> F24520260 10.3892/etm.2014.1484  
positive Expression: MAPK1 --> F24852102 10.1016/j.expneurol.2014.05.01410.1016/j.expn  
positive Expression: MAPK1 --> PTGS2 10.3168/jds.2018-15774  
positive Expression: MAPK1 --> PTGS2 10.1016/j.ajpath.2010.11.074  
positive Expression: MAPK1 --> PTGS2 10.1016/j.archoralbio.2012.04.015  
positive Expression: MAPK1 --> F17222389 10.1016/j.bbrc.2006.12.174

positive Expression: MAPK1 --> F17222389 10.1016/j.bbrc.2006.12.174  
positive Expression: MAPK1 --> F17222389 10.1016/j.bbrc.2006.12.174  
positive Expression: MAPK1 --> F20883667 10.1016/j.bbrc.2010.09.095  
positive Expression: MAPK1 --> F20883667 10.1016/j.bbrc.2010.09.095  
positive Expression: MAPK1 --> F20883667 10.1016/j.bbrc.2010.09.095  
positive Expression: MAPK1 --> F16256955 10.1016/j.bcp.2005.09.023  
positive Expression: MAPK1 --> F16256955 10.1016/j.bcp.2005.09.023  
positive Expression: MAPK1 --> F17632087 10.1016/j.bcp.2007.06.008  
positive Expression: MAPK1 --> F20096264 10.1016/j.bcp.2010.01.008  
positive Expression: MAPK1 --> F22120676 10.1016/j.bcp.2011.11.008  
positive Expression: MAPK1 --> F22120676 10.1016/j.bcp.2011.11.008  
positive Expression: MAPK1 --> F22120676 10.1016/j.bcp.2011.11.008  
positive Expression: MAPK1 --> F22138288 10.1016/j.bcp.2011.11.013  
positive Expression: MAPK1 --> F16185670 10.1016/j.brainres.2005.08.033  
positive Expression: MAPK1 --> PTGS2 10.1016/j.brainres.2007.10.018  
positive Expression: MAPK1 --> F21241676 10.1016/j.brainres.2011.01.013  
positive Expression: MAPK1 --> F22050961 10.1016/j.brainres.2011.08.019  
positive Expression: MAPK1 --> F17767925 10.1016/j.cbi.2007.07.008  
positive Expression: MAPK1 --> F18177848 10.1016/j.cbi.2007.12.001  
positive Expression: MAPK1 --> F19931518 10.1016/j.cbi.2009.11.015  
positive Expression: MAPK1 --> F19931518 10.1016/j.cbi.2009.11.015  
positive Expression: MAPK1 --> F14998726 10.1016/j.chemphyslip.2003.11.004  
positive Expression: MAPK1 --> F17208222 10.1016/j.ejphar.2006.11.060  
positive Expression: MAPK1 --> F17258194 10.1016/j.ejphar.2006.12.005  
positive Expression: MAPK1 --> F19616539 10.1016/j.ejphar.2009.07.007  
positive Expression: MAPK1 --> F20826149 10.1016/j.ejphar.2010.08.015  
positive Expression: MAPK1 --> PTGS2 10.1016/j.ejphar.2010.12.044  
positive Expression: MAPK1 --> F15530865 10.1016/j.yexcr.2004.05.039  
positive Expression: MAPK1 --> F15225655 10.1016/j.febslet.2004.05.070  
positive Expression: MAPK1 --> F16198345 10.1016/j.febslet.2005.08.077  
positive Expression: MAPK1 --> F17889855 10.1016/j.fertnstert.2007.05.053  
positive Expression: MAPK1 --> F18082740 10.1016/j.fertnstert.2007.09.010  
positive Expression: MAPK1 --> F21762900 10.1016/j.fertnstert.2011.06.041  
positive Expression: MAPK1 --> F21762900 10.1016/j.fertnstert.2011.06.041  
positive Expression: MAPK1 --> F16083714 10.1053/j.gastro.2005.06.003  
positive Expression: MAPK1 --> F21726861 10.1016/j.atherosclerosis.2011.06.009  
positive Expression: MAPK1 --> F21968328 10.1016/j.yjmcc.2011.09.014  
positive Expression: MAPK1 --> F17618875 10.1016/j.jpedsurg.2007.02.006  
positive Expression: MAPK1 --> F15848219 10.1016/j.lfs.2004.12.015  
positive Expression: MAPK1 --> F17822719 10.1016/j.lfs.2007.06.027  
positive Expression: MAPK1 --> F12604095 10.1016/S0028-3908(02)00375-1  
positive Expression: MAPK1 --> F16364386 10.1016/j.taap.2005.11.001  
positive Expression: MAPK1 --> PTGS2 10.1016/j.taap.2007.03.019  
positive Expression: MAPK1 --> PTGS2 10.1016/j.taap.2007.03.019  
positive Expression: MAPK1 --> F16275389 10.1016/j.jaci.2005.08.014

positive Expression: MAPK1 --> F16275389 10.1016/j.jaci.2005.08.014  
positive Expression: MAPK1 --> F16275389 10.1016/j.jaci.2005.08.014  
positive Expression: MAPK1 --> F16275389 10.1016/j.jaci.2005.08.014  
positive Expression: MAPK1 --> F17320164 10.1016/j.mam.2006.12.009  
positive Expression: MAPK1 --> F19467701 10.1016/j.biomaterials.2009.04.034  
positive Expression: MAPK1 --> F19118901 10.1016/j.molimm.2008.11.006  
positive Expression: MAPK1 --> F19118901 10.1016/j.molimm.2008.11.006  
positive Expression: MAPK1 --> F18187046 10.1016/j.plipres.2007.12.003  
positive Expression: MAPK1 --> F12559775 10.1016/S0165-6147(02)00043-3  
positive Expression: MAPK1 --> F17945363 10.1016/j.bbamcr.2007.09.001  
positive Expression: MAPK1 --> PTGS2 10.1016/j.bbamcr.2008.03.016  
positive Expression: MAPK1 --> PTGS2 10.1016/j.bbamcr.2008.03.016  
positive Expression: MAPK1 --> PTGS2 10.1016/j.bbamcr.2008.03.016  
positive Expression: MAPK1 --> F19110010 10.1016/j.bbamcr.2008.11.013  
positive Expression: MAPK1 --> F19748535 10.1016/j.virusres.2009.09.004  
positive Expression: MAPK1 --> F15963597 10.1016/j.jhep.2005.02.033  
positive Expression: MAPK1 --> F15963597 10.1016/j.jhep.2005.02.033  
positive Expression: MAPK1 --> F15963597 10.1016/j.jhep.2005.02.033  
positive Expression: MAPK1 --> F17084486 10.1016/j.neuint.2006.09.016  
positive Expression: MAPK1 --> F19922759 10.1016/j.fct.2009.11.035  
positive Expression: MAPK1 --> F21385599 10.1016/j.fct.2011.03.003  
positive Expression: MAPK1 --> PTGS2 10.1016/j.fct.2012.02.006  
positive Expression: MAPK1 --> F12225989 10.1152/ajpcell.00609.2001  
positive Expression: MAPK1 --> F27217781 10.2147/OTT.S9619710.2147/OTT.S96197  
positive Expression: MAPK1 --> F27795708 10.1155/2016/5616807  
positive Expression: MAPK1 --> F16385238 10.1097/01.alc.0000191809.29775.41  
positive Expression: MAPK1 --> F29867151 10.1038/s41598-018-26473-710.1038/s41598-018-  
positive Expression: MAPK1 --> F12843292  
positive Expression: MAPK1 --> F22001348 10.1016/j.ajpath.2011.08.012  
positive Expression: MAPK1 --> F17097611 10.1016/j.bbrc.2006.10.098  
positive Expression: MAPK1 --> F17189670 10.1016/j.canlet.2006.11.020  
positive Expression: MAPK1 --> F18848748 10.1016/j.canlet.2008.07.039  
positive Expression: MAPK1 --> F21377269 10.1016/j.canlet.2011.02.004  
positive Expression: MAPK1 --> F15733640 10.1016/j.pain.2004.12.022  
positive Expression: MAPK1 --> F19135800 10.1016/j.pain.2008.11.013  
positive Expression: MAPK1 --> PTGS2 10.2353/ajpath.2007.061035  
positive Expression: MAPK1 --> F12559967 10.1016/S0006-291X(02)02937-6  
positive Expression: MAPK1 --> F20096264 10.1016/j.bcp.2010.01.008  
positive Expression: MAPK1 --> F16185670 10.1016/j.brainres.2005.08.033  
positive Expression: MAPK1 --> F15890324 10.1016/j.cellimm.2005.03.001  
positive Expression: MAPK1 --> F16781693 10.1016/j.cellimm.2006.04.003  
positive Expression: MAPK1 --> F17481603 10.1016/j.ejphar.2007.04.003  
positive Expression: MAPK1 --> F20353767 10.1016/j.ejphar.2010.03.021  
positive Expression: MAPK1 --> PTGS2 10.1016/j.yjmcc.2007.06.007  
positive Expression: MAPK1 --> F20970453 10.1016/j.plipres.2010.10.003  
positive Expression: MAPK1 --> F17936921 10.1016/j.regpep.2007.05.007  
positive Expression: MAPK1 --> F17945363 10.1016/j.bbamcr.2007.09.001  
positive Expression: MAPK1 --> F17945363 10.1016/j.bbamcr.2007.09.001  
positive Expression: MAPK1 --> F17945363 10.1016/j.bbamcr.2007.09.001  
positive Expression: MAPK1 --> F27539609 10.1007/s12272-016-0805-x



positive Expression: MAPK1 --> F27462100 10.1189/jlb.3MR0416-171R  
positive Expression: MAPK1 --> F27663890 10.1007/s00204-016-1826-4  
positive Expression: MAPK1 --> F28054591 10.1038/srep3991410.1038/srep39914  
positive Expression: MAPK1 --> PTGS2 10.1016/S0006-2952(03)00488-X  
positive Expression: MAPK1 --> F15781049 10.1016/j.brainres.2005.01.047  
positive Expression: MAPK1 --> F18571585 10.1016/j.surg.2008.03.024  
positive Expression: MAPK1 --> F19748535 10.1016/j.virusres.2009.09.004  
positive Expression: MAPK1 --> F19796664 10.1016/j.fct.2009.09.029  
positive Expression: MAPK1 --> F15212812 10.1016/j.tox.2004.03.014  
positive Expression: MAPK1 --> F20850495 10.1016/j.tox.2010.09.004  
positive Expression: MAPK1 --> F20850495 10.1016/j.tox.2010.09.004  
positive Expression: MAPK1 --> F18771702 10.1016/j.mce.2008.08.004  
positive Expression: MAPK1 --> F17069969 10.1016/j.canlet.2006.09.011  
positive Expression: MAPK1 --> F17950526 10.1016/j.canlet.2007.09.009  
positive Expression: MAPK1 --> F12654342 10.1016/S0306-4522(02)00839-4  
positive Expression: MAPK1 --> F17307294 10.1016/j.neuroscience.2006.12.063  
positive Expression: MAPK1 --> F17307294 10.1016/j.neuroscience.2006.12.063  
positive Expression: MAPK1 --> F19376214 10.1016/j.toxlet.2009.04.007  
positive Expression: MAPK1 --> F19715751 10.1016/j.jep.2009.08.032  
positive Expression: MAPK1 --> F20152896 10.1016/j.tiv.2010.02.008  
positive Expression: MAPK1 --> F20152896 10.1016/j.tiv.2010.02.008  
positive Expression: MAPK1 --> F20633634 10.1016/j.tiv.2010.07.008  
positive Expression: MAPK1 --> F15331118 10.1016/j.bbi.2004.05.003  
positive Expression: MAPK1 --> F15917189 10.1016/j.freeradbiomed.2005.02.023  
positive Expression: MAPK1 --> F20036733 10.1016/j.freeradbiomed.2009.12.014  
positive Expression: MAPK1 --> F20036733 10.1016/j.freeradbiomed.2009.12.014  
positive Expression: MAPK1 --> F22080084 10.1016/j.freeradbiomed.2011.10.481  
positive Expression: MAPK1 --> F12531424 10.1016/S0898-6568(02)00075-X  
positive Expression: MAPK1 --> F15567061 10.1016/j.cellsig.2004.07.008  
positive Expression: MAPK1 --> F15601629 10.1016/j.cellsig.2004.09.017  
positive Expression: MAPK1 --> F15993751 10.1016/j.cellsig.2004.12.002  
positive Expression: MAPK1 --> F17341442 10.1016/j.cellsig.2007.01.028  
positive Expression: MAPK1 --> F18572386 10.1016/j.cellsig.2008.05.008  
positive Expression: MAPK1 --> F19800403 10.1016/j.cellsig.2009.09.018  
positive Expression: MAPK1 --> F19656660 10.1016/j.jdermsci.2009.06.017  
positive Expression: MAPK1 --> F20133117 10.1016/j.etp.2009.11.005  
positive Expression: MAPK1 --> PTGS2 10.1016/j.phymed.2010.02.006  
positive Expression: MAPK1 --> PTGS2 10.1016/j.plefa.2003.04.005  
positive Expression: MAPK1 --> F16446079 10.1016/j.plefa.2005.12.001  
positive Expression: MAPK1 --> F20004562 10.1016/j.plefa.2009.11.005  
positive Expression: MAPK1 --> F20004562 10.1016/j.plefa.2009.11.005  
positive Expression: MAPK1 --> PTGS2 10.1016/j.jnutbio.2011.04.021  
positive Expression: MAPK1 --> F18656337 10.1016/j.jnutbio.2008.02.004  
positive Expression: MAPK1 --> F22071130 10.1016/j.ejca.2011.09.026  
positive Expression: MAPK1 --> F10708932 10.1016/S0959-8049(99)00318-4  
positive Expression: MAPK1 --> PTGS2 10.1016/j.ejcts.2010.12.006  
positive Expression: MAPK1 --> PTGS2 10.1016/j.ejcts.2010.12.006  
positive Expression: MAPK1 --> F15501074 10.1016/j.critrevonc.2004.08.004

positive Expression: MAPK1 --> F21095632 10.1016/j.cyto.2010.10.009  
positive Expression: MAPK1 --> F19717011 10.1016/j.phrs.2009.03.015  
positive Expression: MAPK1 --> F19782752 10.1016/j.phrs.2009.09.005  
positive Expression: MAPK1 --> PTGS2 10.1016/j.carpath.2004.03.170  
positive Expression: MAPK1 --> F16516501 10.1016/j.joca.2006.01.006  
positive Expression: MAPK1 --> PTGS2 10.1016/S1072-7515(00)00551-2  
positive Expression: MAPK1 --> F17085321 10.1016/j.prostaglandins.2006.08.006  
positive Expression: MAPK1 --> F17085321 10.1016/j.prostaglandins.2006.08.006  
positive Expression: MAPK1 --> F16713323 10.1016/j.biocel.2006.03.021  
positive Expression: MAPK1 --> F18571461 10.1016/j.biocel.2008.05.005  
positive Expression: MAPK1 --> F19457709 10.1016/j.oraloncology.2009.03.016  
positive Expression: MAPK1 --> F19457709 10.1016/j.oraloncology.2009.03.016  
positive Expression: MAPK1 --> F11239825 10.1016/S1388-1981(01)00089-0  
positive Expression: MAPK1 --> F11239825 10.1016/S1388-1981(01)00089-0  
positive Expression: MAPK1 --> F14984736 10.1016/j.bbalip.2003.12.002  
positive Expression: MAPK1 --> F15238218 10.1016/j.bbalip.2004.04.003  
positive Expression: MAPK1 --> F20159581 10.1016/j.jbiosc.2009.09.003  
positive Expression: MAPK1 --> F19168156 10.1016/j.intimp.2008.12.016  
positive Expression: MAPK1 --> F19168156 10.1016/j.intimp.2008.12.016  
positive Expression: MAPK1 --> F19962455 10.1016/j.intimp.2009.11.014  
positive Expression: MAPK1 --> F22974512 10.1016/j.ygcen.2012.08.020  
positive Expression: MAPK1 --> F22974512 10.1016/j.ygcen.2012.08.020  
positive Expression: MAPK1 --> F22732298 10.1016/j.bbamcr.2012.06.021  
positive Expression: MAPK1 --> F22634430 10.1016/j.bbadis.2012.05.013  
positive Expression: MAPK1 --> F21937212 10.1016/j.jnutbio.2011.04.021  
positive Expression: MAPK1 --> F22883813 10.1016/j.molmed.2012.06.010  
positive Expression: MAPK1 --> F22940184 10.1016/j.intimp.2012.08.011  
positive Expression: MAPK1 --> PTGS2 10.1016/j.biomed.2012.06.004  
positive Expression: MAPK1 --> F23416211 10.1016/j.ejphar.2013.01.061  
positive Expression: MAPK1 --> F23376159 10.1016/j.ejphar.2013.01.025  
positive Expression: MAPK1 --> F23340376 10.1016/j.atherosclerosis.2012.12.007  
positive Expression: MAPK1 --> F23415682 10.1016/j.taap.2013.01.030  
positive Expression: MAPK1 --> F23415682 10.1016/j.taap.2013.01.030  
positive Expression: MAPK1 --> F23267746 10.1016/j.vetimm.2012.11.017  
positive Expression: MAPK1 --> F23348408 10.1016/j.fct.2012.12.062  
positive Expression: MAPK1 --> F23376640 10.1016/j.canlet.2012.12.030  
positive Expression: MAPK1 --> F23376640 10.1016/j.canlet.2012.12.030  
positive Expression: MAPK1 --> F23376640 10.1016/j.canlet.2012.12.030  
positive Expression: MAPK1 --> F23416140 10.1016/j.toxlet.2013.02.003  
positive Expression: MAPK1 --> F23295168 10.1016/j.jep.2012.12.034  
positive Expression: MAPK1 --> F23376440 10.1016/j.tiv.2013.01.012  
positive Expression: MAPK1 --> F23266471 10.1016/j.cellsig.2012.12.006  
positive Expression: MAPK1 --> F23102664 10.1016/j.intimp.2012.10.009  
positive Expression: MAPK1 --> F23562928 10.1016/j.fct.2013.03.029  
positive Expression: MAPK1 --> F23523690 10.1016/j.bbagen.2013.03.014  
positive Expression: MAPK1 --> F23523690 10.1016/j.bbagen.2013.03.014  
positive Expression: MAPK1 --> F23523690 10.1016/j.bbagen.2013.03.014  
positive Expression: MAPK1 --> F23747596 10.1016/j.ejphar.2013.05.023  
positive Expression: MAPK1 --> F24239652 10.1016/j.taap.2013.11.002

positive Expression: MAPK1 --> F24239652 10.1016/j.taap.2013.11.002  
positive Expression: MAPK1 --> F24239652 10.1016/j.taap.2013.11.002  
positive Expression: MAPK1 --> F23796953 10.1016/j.tips.2013.05.003  
positive Expression: MAPK1 --> F23712098 10.1016/j.fct.2013.04.055  
positive Expression: MAPK1 --> F23712098 10.1016/j.fct.2013.04.055  
positive Expression: MAPK1 --> F23968725 10.1016/j.toxlet.2013.08.008  
positive Expression: MAPK1 --> F24036215 10.1016/j.cellsig.2013.09.005  
positive Expression: MAPK1 --> F24530660 10.1016/j.neuro.2014.02.002  
positive Expression: MAPK1 --> F24378735 10.1016/j.mce.2013.12.014  
positive Expression: MAPK1 --> F24424443 10.1016/j.mce.2014.01.007  
positive Expression: MAPK1 --> F24607321 10.1016/j.neuroscience.2014.02.041  
positive Expression: MAPK1 --> F24607321 10.1016/j.neuroscience.2014.02.041  
positive Expression: MAPK1 --> F21262218 10.1016/j.ejphar.2010.12.044  
positive Expression: MAPK1 --> F24852102 10.1016/j.expneurol.2014.05.014  
positive Expression: MAPK1 --> F24852102 10.1016/j.expneurol.2014.05.014  
positive Expression: MAPK1 --> F24742714 10.1016/j.mrfmmm.2014.04.003  
positive Expression: MAPK1 --> F24742714 10.1016/j.mrfmmm.2014.04.003  
positive Expression: MAPK1 --> F24680956 10.1016/j.antiviral.2014.03.009  
positive Expression: MAPK1 --> F24680956 10.1016/j.antiviral.2014.03.009  
positive Expression: MAPK1 --> PTGS2 10.1016/j.bbamcr.2014.11.022  
positive Expression: MAPK1 --> PTGS2 10.1016/j.fct.2014.11.017  
positive Expression: MAPK1 --> F22353212 10.1016/j.fct.2012.02.006  
positive Expression: MAPK1 --> PTGS2 10.1016/j.mce.2014.11.008  
positive Expression: MAPK1 --> F24747121 10.1016/j.canlet.2014.03.037  
positive Expression: MAPK1 --> F24945401 10.1016/j.jep.2014.06.023  
positive Expression: MAPK1 --> F25269780 10.1016/j.cellsig.2014.09.013  
positive Expression: MAPK1 --> PTGS2 10.1016/j.ijid.2014.03.1356  
positive Expression: MAPK1 --> F25172550 10.1016/j.biocel.2014.08.016  
positive Expression: MAPK1 --> F24933588 10.1016/j.intimp.2014.06.002  
positive Expression: MAPK1 --> F25818189 10.1016/j.lfs.2015.03.006  
positive Expression: MAPK1 --> F25461841 10.1016/j.bbamcr.2014.11.022  
positive Expression: MAPK1 --> F25460360 10.1016/j.fct.2014.11.017  
positive Expression: MAPK1 --> F25451977 10.1016/j.mce.2014.11.008  
positive Expression: MAPK1 --> F25917838 10.1016/j.jep.2015.04.022  
positive Expression: MAPK1 --> F26119525 10.1016/j.tiv.2015.06.024  
positive Expression: MAPK1 --> F25643632 10.1016/j.cellsig.2015.01.014  
positive Expression: MAPK1 --> F25643632 10.1016/j.cellsig.2015.01.014  
positive Expression: MAPK1 --> F25681793 10.1016/j.coph.2014.12.011  
positive Expression: MAPK1 --> F25743463 10.1016/j.bpg.2014.12.003  
positive Expression: MAPK1 --> F26110105 10.1016/j.fob.2015.06.001  
positive Expression: MAPK1 --> F19589865  
positive Expression: MAPK1 --> F18723875  
positive Expression: MAPK1 --> F18559923  
positive Expression: MAPK1 --> F18339712  
positive Expression: MAPK1 --> F18339712  
positive Expression: MAPK1 --> F17537778  
positive Expression: MAPK1 --> F17537778  
positive Expression: MAPK1 --> F17478553  
positive Expression: MAPK1 --> F16998585  
positive Expression: MAPK1 --> F16740977  
positive Expression: MAPK1 --> F16574793

positive Expression: MAPK1 --> F16574793  
positive Expression: MAPK1 --> F16081631  
positive Expression: MAPK1 --> F15784717  
positive Expression: MAPK1 --> F15784717  
positive Expression: MAPK1 --> F15483103  
positive Expression: MAPK1 --> F15483103  
positive Expression: MAPK1 --> F15256495  
positive Expression: MAPK1 --> F12107235  
positive Expression: MAPK1 --> F21044318  
positive Expression: MAPK1 --> F20092633  
positive Expression: MAPK1 --> F20018844  
positive Expression: MAPK1 --> F20018844  
positive Expression: MAPK1 --> F19534809  
positive Expression: MAPK1 --> F19534809  
positive Expression: MAPK1 --> F19228814  
positive Expression: MAPK1 --> F19164179  
positive Expression: MAPK1 --> F19037103  
positive Expression: MAPK1 --> F18854308  
positive Expression: MAPK1 --> F18519570  
positive Expression: MAPK1 --> F18208815  
positive Expression: MAPK1 --> F17962194  
positive Expression: MAPK1 --> F17962194  
positive Expression: MAPK1 --> F17962194  
positive Expression: MAPK1 --> F17267381  
positive Expression: MAPK1 --> F17267381  
positive Expression: MAPK1 --> F17077316  
positive Expression: MAPK1 --> F16618699  
positive Expression: MAPK1 --> F16467309  
positive Expression: MAPK1 --> F16467309  
positive Expression: MAPK1 --> F16467309  
positive Expression: MAPK1 --> F16371352  
positive Expression: MAPK1 --> F16083499  
positive Expression: MAPK1 --> F15961395  
positive Expression: MAPK1 --> F15961395  
positive Expression: MAPK1 --> F15767259  
positive Expression: MAPK1 --> F15767259  
positive Expression: MAPK1 --> F15525653  
positive Expression: MAPK1 --> F15525649  
positive Expression: MAPK1 --> F15496409  
positive Expression: MAPK1 --> F15375172

positive Expression: MAPK1 --> F 15329330  
positive Expression: MAPK1 --> F 15225374  
positive Expression: MAPK1 --> F 15007072  
positive Expression: MAPK1 --> F 15001568  
positive Expression: MAPK1 --> F 14985247  
positive Expression: MAPK1 --> F 14530261  
positive Expression: MAPK1 --> F 14530261  
positive Expression: MAPK1 --> F 14530261  
positive Expression: MAPK1 --> F 12907684  
positive Expression: MAPK1 --> F 12907684  
positive Expression: MAPK1 --> F 12907684  
positive Expression: MAPK1 --> F 12902324  
positive Expression: MAPK1 --> F 12902324  
positive Expression: MAPK1 --> F 12902324  
positive Expression: MAPK1 --> F 12837757  
positive Expression: MAPK1 --> F 12826679  
positive Expression: MAPK1 --> F 12796504  
positive Expression: MAPK1 --> F 12796504  
positive Expression: MAPK1 --> F 12796504  
positive Expression: MAPK1 --> F 12695520  
positive Expression: MAPK1 --> F 12606757  
positive Expression: MAPK1 --> F 12588866  
positive Expression: MAPK1 --> F 12239223  
positive Expression: MAPK1 --> F 12239223  
positive Expression: MAPK1 --> F 12239223  
positive Expression: MAPK1 --> F 12130685  
positive Expression: MAPK1 --> F 12072440  
positive Expression: MAPK1 --> F 11901151  
positive Expression: MAPK1 --> F 11861647  
positive Expression: MAPK1 --> F 11854442  
positive Expression: MAPK1 --> F 11726530  
positive Expression: MAPK1 --> F 11292836  
positive Expression: MAPK1 --> F 11259631  
positive Expression: MAPK1 --> F 11259631  
positive Expression: MAPK1 --> F 11207214

positive Expression: MAPK1 --> F11179444  
positive Expression: MAPK1 --> F10982805  
positive Expression: MAPK1 --> F10969080  
positive Expression: MAPK1 --> F10930430  
positive Expression: MAPK1 --> F10930430  
positive Expression: MAPK1 --> F10930430  
positive Expression: MAPK1 --> F10930401  
positive Expression: MAPK1 --> F10930401  
positive Expression: MAPK1 --> F10722727  
positive Expression: MAPK1 --> F10671533  
positive Expression: MAPK1 --> F10652293  
positive Expression: MAPK1 --> F10652293  
positive Expression: MAPK1 --> F10652293  
positive Expression: MAPK1 --> F10593866  
positive Expression: MAPK1 --> F10593866  
positive Expression: MAPK1 --> F10506169  
positive Expression: MAPK1 --> F10506169  
positive Expression: MAPK1 --> F10066822  
positive Expression: MAPK1 --> F9988750  
positive Expression: MAPK1 --> F9765305  
positive Expression: MAPK1 --> F9705357  
positive Expression: MAPK1 --> F19218449  
positive Expression: MAPK1 --> F17600311  
positive Expression: MAPK1 --> F17502624  
positive Expression: MAPK1 --> F17463321  
positive Expression: MAPK1 --> F16203985  
positive Expression: MAPK1 --> F15699325  
positive Expression: MAPK1 --> F12578976  
positive Expression: MAPK1 --> F12578976  
positive Expression: MAPK1 --> F11853544  
positive Expression: MAPK1 --> F11085935  
positive Expression: MAPK1 --> F11085935  
positive Expression: MAPK1 --> F10785514  
positive Expression: MAPK1 --> F9494074  
positive Expression: MAPK1 --> F9291137  
positive Expression: MAPK1 --> F16614396  
positive Expression: MAPK1 --> F16278684  
positive Expression: MAPK1 --> F16278684  
positive Expression: MAPK1 --> F15623844  
positive Expression: MAPK1 --> F15623844  
positive Expression: MAPK1 --> F15304095  
positive Expression: MAPK1 --> F14708615  
positive Expression: MAPK1 --> F14708615  
positive Expression: MAPK1 --> F14708615



positive Expression: MAPK1 --> F19290049  
positive Expression: MAPK1 --> F17329433  
positive Expression: MAPK1 --> F15213271  
positive Expression: MAPK1 --> F22818222 10.1186/1742-2094-9-177  
positive Expression: MAPK1 --> F22818222 10.1186/1742-2094-9-177  
positive Expression: MAPK1 --> F22818222 10.1186/1742-2094-9-177  
positive Expression: MAPK1 --> F22766885 10.1194/jlr.D029546  
positive Expression: MAPK1 --> F22766885 10.1194/jlr.D029546  
positive Expression: MAPK1 --> F22824956 10.3892/or.2012.1918  
positive Expression: MAPK1 --> F22941376 10.3892/or.2012.1998  
positive Expression: MAPK1 --> F22895548 10.3892/mmr.2012.1023  
positive Expression: MAPK1 --> F22767315 10.3892/ijmm.2012.1052  
positive Expression: MAPK1 --> F22767315 10.3892/ijmm.2012.1052  
positive Expression: MAPK1 --> F22879597 10.1074/jbc.M112.385542  
positive Expression: MAPK1 --> F22747786 10.1186/1742-2094-9-152  
positive Expression: MAPK1 --> F22571318 10.1186/1743-8977-9-14  
positive Expression: MAPK1 --> F22571318 10.1186/1743-8977-9-14  
positive Expression: MAPK1 --> F23184961 10.1074/jbc.M112.424366  
positive Expression: MAPK1 --> F22688643 10.1007/s10753-012-9488-8  
positive Expression: MAPK1 --> PTGS2  
positive Expression: MAPK1 --> F23394447 10.1615/JEnvironPatholToxicolOncol.2013005365  
positive Expression: MAPK1 --> PTGS2 10.1248/bpb.33.1307  
positive Expression: MAPK1 --> F20200402 10.1189/jlb.1009668  
positive Expression: MAPK1 --> F20558725 10.1074/jbc.M110.135251  
positive Expression: MAPK1 --> F21175416  
positive Expression: MAPK1 --> F21141740 10.3727/096504010X12828372551867  
positive Expression: MAPK1 --> F21156799 10.1074/jbc.M110.192393  
positive Expression: MAPK1 --> F21828177 10.1210/en.2011-0255  
positive Expression: MAPK1 --> F21876694 10.1155/2012/782020  
positive Expression: MAPK1 --> F21862586 10.1074/jbc.M111.260414  
positive Expression: MAPK1 --> F22210037 10.1007/s12272-011-1214-9  
positive Expression: MAPK1 --> F22210040 10.1007/s12272-011-1217-6  
positive Expression: MAPK1 --> F22181070 10.1089/jmf.2011.1851  
positive Expression: MAPK1 --> F22181070 10.1089/jmf.2011.1851  
positive Expression: MAPK1 --> F22181070 10.1089/jmf.2011.1851  
positive Expression: MAPK1 --> F22393041 10.1074/jbc.M111.308841  
positive Expression: MAPK1 --> F20405237 10.1007/s12012-010-9072-0  
positive Expression: MAPK1 --> F20446020 10.1007/s11010-010-0469-7  
positive Expression: MAPK1 --> F20446020 10.1007/s11010-010-0469-7  
positive Expression: MAPK1 --> F20446020 10.1007/s11010-010-0469-7  
positive Expression: MAPK1 --> F20798930 10.1007/s00204-010-0579-8  
positive Expression: MAPK1 --> F21044318 10.1186/1476-4598-9-288  
positive Expression: MAPK1 --> F21140284 10.1007/s11010-010-0682-4  
positive Expression: MAPK1 --> F21569331 10.1186/1423-0127-18-30  
positive Expression: MAPK1 --> F21810225 10.1186/1743-8977-8-23  
positive Expression: MAPK1 --> F21810225 10.1186/1743-8977-8-23  
positive Expression: MAPK1 --> F21169864 10.1097/HJH.0b013e328342b271



positive Expression: MAPK1 --> F21169864 10.1097/HJH.0b013e328342b271  
positive Expression: MAPK1 --> F21169864 10.1097/HJH.0b013e328342b271  
positive Expression: MAPK1 --> F21169864 10.1097/HJH.0b013e328342b271  
positive Expression: MAPK1 --> F23184385 10.1161/HYPERTENSIONAHA.112.196303  
positive Expression: MAPK1 --> PTGS2 10.1161/CIRCRESAHA.112.280399  
positive Expression: MAPK1 --> PTGS2 10.1161/CIRCRESAHA.112.280399  
positive Expression: MAPK1 --> F23747881 10.2741/4177  
positive Expression: MAPK1 --> F21412256 10.1038/jid.2011.37  
positive Expression: MAPK1 --> F23680829 10.1097/BRS.0b013e31829a6930  
positive Expression: MAPK1 --> F20697426 10.1038/icb.2010.94  
positive Expression: MAPK1 --> F24159347 10.1155/2013/518301  
positive Expression: MAPK1 --> F24174713 10.1155/2013/964012  
positive Expression: MAPK1 --> F24174713 10.1155/2013/964012  
positive Expression: MAPK1 --> F23943857 10.1194/jlr.M042283  
positive Expression: MAPK1 --> F21490228 10.1523/JNEUROSCI.5986-10.2011  
positive Expression: MAPK1 --> F22140508 10.1371/journal.pone.0028065  
positive Expression: MAPK1 --> F23029074 10.1371/journal.pone.0045529  
positive Expression: MAPK1 --> F23155470 10.1371/journal.pone.0049232  
positive Expression: MAPK1 --> F23118554 10.4196/kjpp.2012.16.5.313  
positive Expression: MAPK1 --> F23755184 10.1371/journal.pone.0065150  
positive Expression: MAPK1 --> F23823806 10.1371/journal.pone.0066561  
positive Expression: MAPK1 --> F23977987 10.5483/BMBRep.2013.46.8.237  
positive Expression: MAPK1 --> F24092824 10.1210/jc.2013-2662  
positive Expression: MAPK1 --> F24025354 10.4161/cbt.26427  
positive Expression: MAPK1 --> F23836924 10.1210/me.2013-1130  
positive Expression: MAPK1 --> F24533777 10.2174/1389450115666140217152042  
positive Expression: MAPK1 --> F24569980 10.2478/s11658-014-0186-4  
positive Expression: MAPK1 --> PTGS2 10.1074/jbc.M113.517581  
positive Expression: MAPK1 --> F23728342 10.1038/onc.2013.184  
positive Expression: MAPK1 --> F23728342 10.1038/onc.2013.184  
positive Expression: MAPK1 --> F23728342 10.1038/onc.2013.184  
positive Expression: MAPK1 --> F24738717 10.1089/jmf.2013.2936  
positive Expression: MAPK1 --> F24888317 10.3892/ijmm.2014.1790  
positive Expression: MAPK1 --> F25177723 10.1155/2014/397430  
positive Expression: MAPK1 --> F25180251 10.1530/JME-14-0060  
positive Expression: MAPK1 --> F25180251 10.1530/JME-14-0060  
positive Expression: MAPK1 --> F25319133 10.3892/ijmm.2014.1967  
positive Expression: MAPK1 --> F25319133 10.3892/ijmm.2014.1967  
positive Expression: MAPK1 --> PTGS2 10.1097/MAJ.0000000000000335  
positive Expression: MAPK1 --> PTGS2  
positive Expression: MAPK1 --> F25435376 10.3892/ijmm.2014.2014  
positive Expression: MAPK1 --> PTGS2 10.3233/JAD-141635  
positive Expression: MAPK1 --> PTGS2 10.1179/1743132814Y.0000000426  
positive Expression: MAPK1 --> F21873449 10.1152/ajplung.00092.2011  
positive Expression: MAPK1 --> F21937604 10.1152/ajprenal.00590.2010  
positive Expression: MAPK1 --> F22361730 10.1152/ajpgi.00427.2011

positive Expression: MAPK1 --> F24226522 10.1152/ajprenal.00352.2013  
positive Expression: MAPK1 --> F24872319 10.1152/ajprenal.00634.2013  
positive Expression: MAPK1 --> F22613973 10.1159/000171028  
positive Expression: MAPK1 --> F22613973 10.1159/000171028  
positive Expression: MAPK1 --> F22613973 10.1159/000171028  
positive Expression: MAPK1 --> F25738262 10.3892/ijmm.2015.2120  
positive Expression: MAPK1 --> F22095018 10.1159/000331513  
positive Expression: MAPK1 --> F23382072 10.1128/MCB.01690-12  
positive Expression: MAPK1 --> F23899566 10.1152/physrev.00004.2012  
positive Expression: MAPK1 --> F21071999 10.1159/000321327  
positive Expression: MAPK1 --> F26050653  
positive Expression: MAPK1 --> PTGS2 10.1530/REP-14-0392  
positive Expression: MAPK1 --> F25936351 10.3892/ijmm.2015.2195  
positive Expression: MAPK1 --> F25783839 10.1177/1753425915576345  
positive Expression: MAPK1 --> F9753607  
positive Expression: MAPK1 --> F9830045  
positive Expression: MAPK1 --> F10453032  
positive Expression: MAPK1 --> F10506169  
positive Expression: MAPK1 --> F10652293  
positive Expression: MAPK1 --> F10785514  
positive Expression: MAPK1 --> F11228545  
positive Expression: MAPK1 --> F11179444  
positive Expression: MAPK1 --> F11292836  
positive Expression: MAPK1 --> F11756226  
positive Expression: MAPK1 --> F11811557  
positive Expression: MAPK1 --> F11854442  
positive Expression: MAPK1 --> F11992399  
positive Expression: MAPK1 --> F12096032  
positive Expression: MAPK1 --> F12107235  
positive Expression: MAPK1 --> F12176102  
positive Expression: MAPK1 --> F12377986  
positive Expression: MAPK1 --> F12444157  
positive Expression: MAPK1 --> F12930301  
positive Expression: MAPK1 --> F12837757  
positive Expression: MAPK1 --> F14584892  
positive Expression: MAPK1 --> F14708615  
positive Expression: MAPK1 --> F14984736  
positive Expression: MAPK1 --> F15106733  
positive Expression: MAPK1 --> F15007072  
positive Expression: MAPK1 --> F15238218  
positive Expression: MAPK1 --> F15238218  
positive Expression: MAPK1 --> F15117678  
positive Expression: MAPK1 --> F15470067  
positive Expression: MAPK1 --> F15546477  
positive Expression: MAPK1 --> F15557607  
positive Expression: MAPK1 --> F15623844  
positive Expression: MAPK1 --> F15703831  
positive Expression: MAPK1 --> F15515144  
positive Expression: MAPK1 --> F16088958  
positive Expression: MAPK1 --> F16275389  
positive Expression: MAPK1 --> F16446079

positive Expression: MAPK1 --> F17047069  
positive Expression: MAPK1 --> F17222389  
positive Expression: MAPK1 --> F17307294  
positive Expression: MAPK1 --> F17267381  
positive Expression: MAPK1 --> F17189670  
positive Expression: MAPK1 --> F17463321  
positive Expression: MAPK1 --> F17341442  
positive Expression: MAPK1 --> F17640979  
positive Expression: MAPK1 --> F18162716  
positive Expression: MAPK1 --> F18162716  
positive Expression: MAPK1 --> F17964630  
positive Expression: MAPK1 --> F18285354 10.1093/rheumatology/kem376  
positive Expression: MAPK1 --> F18208815 10.1074/jbc.M703318200  
positive Expression: MAPK1 --> F18208815 10.1074/jbc.M703318200  
positive Expression: MAPK1 --> F18339712 10.1210/en.2007-1633  
positive Expression: MAPK1 --> F18452714 10.1016/j.bbamcr.2008.03.016  
positive Expression: MAPK1 --> F18571585 10.1016/j.surg.2008.03.024  
positive Expression: MAPK1 --> F18566751 10.1007/s11010-008-9843-0  
positive Expression: MAPK1 --> F18703638 10.1152/ajpgi.90423.2008  
positive Expression: MAPK1 --> F18958425 10.1007/s12272-001-2114-1  
positive Expression: MAPK1 --> F18958425 10.1007/s12272-001-2114-1  
positive Expression: MAPK1 --> F19116446  
positive Expression: MAPK1 --> F19118901 10.1016/j.molimm.2008.11.006  
positive Expression: MAPK1 --> F19584262 10.1158/1541-7786.MCR-08-0493  
positive Expression: MAPK1 --> F19758248 10.1111/j.1600-0722.2009.00669.x  
positive Expression: MAPK1 --> F20121928 10.1111/j.1600-0722.2009.00682.x  
positive Expression: MAPK1 --> F20121928 10.1111/j.1600-0722.2009.00682.x  
positive Expression: MAPK1 --> F19781629 10.1016/j.cellsig.2009.09.014  
positive Expression: MAPK1 --> F19781629 10.1016/j.cellsig.2009.09.014  
positive Expression: MAPK1 --> F20386571 10.1038/cr.2010.49  
positive Expression: MAPK1 --> F20883667 10.1016/j.bbrc.2010.09.095  
positive Expression: MAPK1 --> F21071999 10.1159/000321327  
positive Expression: MAPK1 --> F20853849 10.1021/bi100645m  
positive Expression: MAPK1 --> F21264892 10.1002/cbf.1720  
positive Expression: MAPK1 --> F21169864 10.1097/HJH.0b013e328342b271  
positive Expression: MAPK1 --> F21419296 10.1016/j.joen.2011.01.012  
positive Expression: MAPK1 --> F21311042 10.1161/ATVBAHA.110.216044  
positive Expression: MAPK1 --> F21385599 10.1016/j.fct.2011.03.003  
positive Expression: MAPK1 --> F21470077 10.3109/15376516.2011.568982  
positive Expression: MAPK1 --> F21790943 10.1111/j.1462-5822.2011.01650.x  
positive Expression: MAPK1 --> F21428715 10.3109/08923973.2011.557383  
positive Expression: MAPK1 --> F21428715 10.3109/08923973.2011.557383  
positive Expression: MAPK1 --> F21678415 10.1002/jcp.22880  
positive Expression: MAPK1 --> F22181070 10.1089/jmf.2011.1851  
positive Expression: MAPK1 --> F22613973 10.1159/000171028  
positive Expression: MAPK1 --> F22941376 10.3892/or.2012.1998  
positive Expression: MAPK1 --> F22974838 10.1016/j.fct.2012.08.041  
positive Expression: MAPK1 --> F23415682 10.1016/j.taap.2013.01.030  
positive Expression: MAPK1 --> F23376440 10.1016/j.tiv.2013.01.012  
positive Expression: MAPK1 --> F23416211 10.1016/j.ejphar.2013.01.061  
positive Expression: MAPK1 --> F24092824 10.1210/jc.2013-2662

positive Expression: MAPK1 --> F23728342 10.1038/onc.2013.184  
positive Expression: MAPK1 --> F24680956 10.1016/j.antiviral.2014.03.009  
positive Expression: MAPK1 --> F24680956 10.1016/j.antiviral.2014.03.009  
positive Expression: MAPK1 --> F25399887 10.1111/1440-1681.12339  
positive Expression: MAPK1 --> F25399887 10.1111/1440-1681.12339  
positive Expression: MAPK1 --> F25596430 10.1016/j.taap.2015.01.005  
positive Expression: MAPK1 --> F25503726 10.1152/ajprenal.00206.2014  
positive Expression: MAPK1 --> F25783937 10.1186/s12906-015-0583-x  
positive Expression: MAPK1 --> F25811799 10.1038/cddis.2015.69  
positive Expression: MAPK1 --> F25888188 10.1186/s12906-015-0583-x  
positive Expression: MAPK1 --> F25890183 10.1186/s12985-015-0264-x  
positive Expression: MAPK1 --> PTGS2  
positive Expression: MAPK1 --> F26658076 10.1371/journal.pone.0143663  
positive Expression: MAPK1 --> F26658076 10.1371/journal.pone.0143663  
positive Expression: MAPK1 --> F26853158 10.1016/j.semcancer.2016.02.001  
positive Expression: MAPK1 --> F26466383 10.1371/journal.pone.0129244  
positive Expression: MAPK1 --> F26466383 10.1371/journal.pone.0129244  
positive Expression: MAPK1 --> F26466383 10.1371/journal.pone.0129244  
positive Expression: MAPK1 --> F26658076 10.1371/journal.pone.014366310.1371/journal.p  
positive Expression: MAPK1 --> PTGS2 10.3233/RNN-150559  
positive Expression: MAPK1 --> F26608166 10.4014/jmb.1510.10070  
positive Expression: MAPK1 --> F26608166 10.4014/jmb.1510.10070  
positive Expression: MAPK1 --> F27313009 10.1038/srep2799510.1038/srep27995  
positive Expression: MAPK1 --> F27548147 10.3390/ijms17081359  
positive Expression: MAPK1 --> F27548147 10.3390/ijms17081359  
positive Expression: MAPK1 --> F27664170 10.1093/mmy/myw082  
positive Expression: MAPK1 --> F27664170 10.1093/mmy/myw082  
positive Expression: MAPK1 --> PTGS2  
positive Expression: MAPK1 --> PTGS2  
positive Expression: MAPK1 --> PTGS2  
positive Expression: MAPK1 --> F28219441 10.1186/s12974-017-0795-8  
positive Expression: MAPK1 --> F28288820 10.1016/j.bcp.2017.03.003  
positive Expression: MAPK1 --> F28288820 10.1016/j.bcp.2017.03.003  
positive Expression: MAPK1 --> F28245546 10.3390/molecules22030334  
positive Expression: MAPK1 --> F27814606 10.2741/4476  
positive Expression: MAPK1 --> F27324043 10.1007/s12013-016-0744-7  
positive Expression: MAPK1 --> F28325144 10.2174/1389450118666170321105425  
positive Expression: MAPK1 --> F29038542 10.1038/s41598-017-12648-110.1038/s41598-017-  
positive Expression: MAPK1 --> F29274705 10.1016/j.pharmthera.2017.12.008  
positive Expression: MAPK1 --> F29416441 10.1186/s12935-018-0511-5  
positive Expression: MAPK1 --> F29463003 10.3390/ijms19020599  
positive Expression: MAPK1 --> F29737477 10.1007/s10753-018-0805-810.1007/s10753-018-0  
positive Expression: MAPK1 --> F29594389 10.1007/s00018-018-2805-0  
positive Expression: MAPK1 --> F30119635 10.1186/s13046-018-0839-7  
positive Expression: MAPK1 --> PTGS2 10.1080/01616412.2019.1580459  
positive Expression: MAPK1 --> F26794660 10.1038/cddis.2015.399  
positive Expression: MAPK1 --> F31811862 10.1016/j.cbi.2019.10890310.1016/j.cbi.2019.1  
positive Expression: MAPK1 --> F31811862 10.1016/j.cbi.2019.10890310.1016/j.cbi.2019.1  
positive Expression: MAPK1 --> PTGS2 10.26355/eurrev\_201911\_19587  
positive Expression: MAPK1 --> F30773096 10.1177/1933719119828115  
positive Expression: MAPK1 --> PTGS2 10.7150/ijbs.35128  
positive Expression: MAPK1 --> F32224280 10.1016/j.fsi.2020.03.05610.1016/j.fsi.2020.0  
positive Expression: MAPK1 --> F32303181 10.1186/s12865-020-00347-y  
positive Expression: MAPK1 --> F32303181 10.1186/s12865-020-00347-y

positive Expression: MAPK1 --> F32303181 10.1186/s12865-020-00347-y  
positive Expression: MAPK1 --> F32303181 10.1186/s12865-020-00347-y  
positive Expression: MAPK1 --> PTGS2 10.1177/0003319719896472  
positive Expression: MAPK1 --> PTGS2 10.2174/1568009620666200101094736  
positive Expression: MAPK1 --> F33198771 10.1186/s12974-020-02023-9  
positive Expression: MAPK1 --> F33505120 10.1007/s10616-020-00449-w  
positive Expression: MAPK1 --> F33527851 10.1177/0960327120949619  
positive Expression: MAPK1 --> F33527851 10.1177/0960327120949619  
positive Expression: MAPK1 --> F33011728 10.1159/000511280  
positive Expression: MAPK1 --> F32981501 10.2174/1389450121666200925150022  
positive Expression: MAPK1 --> F33991355 10.1111/pim.1286810.1111/pim.12868  
positive Expression: MAPK1 --> F33790105 10.1248/BPB.B20-00889  
positive Expression: MAPK1 --> F34078818 10.1248/bpb.b21-00078  
positive Expression: MAPK1 --> F34078818 10.1248/bpb.b21-00078  
positive Expression: MAPK1 --> F34078818 10.1248/bpb.b21-00078  
positive Expression: MAPK1 --> F34031706 10.1007/s00011-021-01471-0  
positive Expression: MAPK1 --> F34198981 10.3390/i jms22136894  
positive Expression: MAPK1 --> F33081671 10.2174/1389450121666201020155010  
positive Expression: MAPK1 --> F34824589 10.1155/2021/5319584  
positive Expression: MAPK1 --> F35130451 10.1128/iai.00672-21  
positive Expression: MAPK1 --> F35382723 10.2174/1568026622666220405143003  
positive Expression: MAPK1 --> PTGS2 10.5483/BMBRep.2022.55.9.061  
positive Expression: MAPK1 --> F36268909 10.1515/hsz-2022-0218  
positive Expression: MAPK1 --> F36598592 10.1007/s10753-022-01778-y  
positive Regulation: PTGS2 --> M29229533 10.1016/j.ejphar.2017.11.045  
positive Regulation: PTGS2 --> M10969080 10.1074/jbc.M006168200  
positive Regulation: PTGS2 --> M30679074 10.1016/j.ijcard.2018.12.077  
positive Regulation: PTGS2 --> M33603542 10.1016/j.jsps.2020.12.011  
positive Regulation: PTGS2 --> M33221682 10.1016/j.tranon.2020.100940  
positive Regulation: PTGS2 --> M11891194 10.1016/S0002-9440(10)64918-8  
positive Regulation: PTGS2 --> M18549804 10.1016/j.ab.2008.05.026  
positive Regulation: PTGS2 --> M22120676 10.1016/j.bcp.2011.11.008  
positive Regulation: PTGS2 --> M21565184 10.1016/j.yexmp.2011.04.014  
positive Regulation: PTGS2 --> M17382352 10.1016/j.lfs.2007.02.008  
positive Regulation: PTGS2 --> M16446079 10.1016/j.plefa.2005.12.001  
positive Regulation: PTGS2 --> M20470889 10.1016/j.nbd.2010.05.005  
positive Regulation: PTGS2 --> M17085321 10.1016/j.prostaglandins.2006.08.006  
positive Regulation: PTGS2 --> M23810444 10.1016/j.intimp.2013.06.008  
positive Regulation: PTGS2 --> M24975097 10.1016/j.ejphar.2014.06.027  
positive Regulation: PTGS2 --> MAPK1 10.1016/S1556-0864(16)30013-2  
positive Regulation: PTGS2 --> M16740977  
positive Regulation: PTGS2 --> M10969080  
positive Regulation: PTGS2 --> M9291137  
positive Regulation: PTGS2 --> M16396944  
positive Regulation: PTGS2 --> M16396944  
positive Regulation: PTGS2 --> M27301644 10.1186/s12974-016-0615-6  
positive Regulation: PTGS2 --> M29156550 10.3390/i jms18112449  
positive Regulation: PTGS2 --> M29976894 10.3390/i jms19071966  
positive Regulation: PTGS2 --> M29976894 10.3390/i jms19071966  
positive Regulation: PTGS2 --> M30265377 10.1002/JLB.3HI0518-193R  
positive Regulation: PTGS2 --> M28800785 10.3727/096504017X15021536183517  
positive Regulation: PTGS2 --> M32962418 10.1177/1759091420944658  
positive Regulation: PTGS2 --> M33221682 10.1016/j.tranon.2020.100940  
positive Regulation: PTGS2 --> M33383887 10.3390/i jms22010265

positive Regulation: PTGS2 --> M22879597 10.1074/jbc.M112.385542  
 positive Regulation: PTGS2 --> M21737546 10.1681/ASN.2010111149  
 positive Regulation: PTGS2 --> M25785965 10.1371/journal.pone.0119416  
 positive Regulation: PTGS2 --> M26500452 10.1186/s12935-015-0255-4  
 positive Regulation: PTGS2 --> M26884798 10.1155/2016/8981650  
 positive Regulation: PTGS2 --> M11891194 10.1016/S0002-9440(10)64918-8  
 positive Regulation: PTGS2 --> M16396944 10.1152/ajprenal.00267.2005  
 positive Regulation: PTGS2 --> M17318410 10.1007/s11010-007-9411-z  
 positive Regulation: PTGS2 --> M19584262 10.1158/1541-7786.MCR-08-049310.1158/1541-778  
 positive Regulation: PTGS2 --> M19671676 10.1158/1541-7786.MCR-09-000410.1158/1541-778  
 positive Regulation: PTGS2 --> M19671676 10.1158/1541-7786.MCR-09-000410.1158/1541-778  
 positive Regulation: PTGS2 --> M20035047 10.2353/ajpath.2010.09022210.2353/ajpath.2010  
 positive Regulation: PTGS2 --> M21807123 10.1016/j.intimp.2011.07.01110.1016/j.intimp.  
 positive Regulation: PTGS2 --> M25238253 10.1039/c4fo00612g10.1039/c4fo00612g  
 positive Regulation: PTGS2 --> M26418808 10.1002/jbt.2176910.1002/jbt.21769  
 positive Regulation: PTGS2 --> M26428849 10.1016/j.intimp.2015.09.01810.1016/j.intimp.  
 positive Regulation: PTGS2 --> M27819025 10.1155/2016/9351787  
 positive Regulation: PTGS2 --> M27819025 10.1155/2016/9351787  
 positive Regulation: PTGS2 --> MAPK1 10.3390/ijms221910250  
 positive Regulation: PTGS2 --> MAPK1 10.1016/j.ijcard.2018.12.077  
 positive Regulation: PTGS2 --> MAPK1 10.1002/JLB.3HI0518-193R  
 positive Regulation: PTGS2 --> MAPK1 10.1016/j.jsps.2020.12.011  
 positive Regulation: PTGS2 --> M35850845 10.19540/j.cnki.cjcm.20220307.702  
 positive MolTransport: MAPK1 --> 27174766 10.1016/j.taap.2016.05.003  
 positive MolTransport: MAPK1 --> 15567061 10.1016/j.cellsig.2004.07.008  
 positive MolTransport: MAPK1 --> 19450684 10.1016/j.phrs.2009.05.001  
 positive MolTransport: MAPK1 --> 26410343 10.1016/j.jnutbio.2015.08.026  
 positive MolTransport: MAPK1 --> 17537778  
 positive MolTransport: MAPK1 --> 15914468  
 positive MolTransport: MAPK1 --> 28333094 10.3390/molecules22040506  
 positive MolTransport: MAPK1 --> 31999508 10.1152/physrev.00014.2019  
 positive MolTransport: MAPK1 --> 23389111 10.1152/ajpregu.00355.2012  
 positive MolTransport: MAPK1 --> 17537778 10.1183/09031936.00008707  
 positive MolTransport: MAPK1 --> 17097611 10.1016/j.bbrc.2006.10.098  
 positive MolTransport: MAPK1 --> 16275389 10.1016/j.jaci.2005.08.014  
 positive MolTransport: MAPK1 --> 17537778  
 positive MolTransport: MAPK1 --> 17537778  
 positive MolTransport: MAPK1 --> 11207214  
 positive MolTransport: MAPK1 --> 11207214  
 positive MolTransport: MAPK1 --> 15567061  
 MolTransport: NGF ---> PTGS2 28673205 10.1177/1933719117716778  
 MolTransport: NGF ---> PTGS2 28673205 10.1177/1933719117716778  
 MolTransport: NGF ---> PTGS2 28673205 10.1177/1933719117716778  
 negative PromoterBinding: TP53 --24413150 10.1038/cdd.2013.186  
 negative PromoterBinding: TP53 --33512431 10.1182/blood.202000745210.1182/blood.2020007  
 negative PromoterBinding: TP53 --33512431 10.1182/blood.202000745210.1182/blood.2020007  
 negative PromoterBinding: TP53 --24241898 10.1007/s13277-013-1318-610.1007/s13277-013-1  
 negative PromoterBinding: TP53 --18208354 10.1515/BC.2008.03910.1515/BC.2008.039  
 negative PromoterBinding: TP53 --18208354 10.1515/BC.2008.03910.1515/BC.2008.039  
 negative PromoterBinding: TP53 --20739623 10.1152/ajpcell.00080.2010  
 negative PromoterBinding: TP53 --24206455 10.1089/ars.2013.5718

negative PromoterBinding: TP53 --24413150 10.1038/cdd.2013.186  
negative PromoterBinding: TP53 --23608884 10.1038/leu.2013.125  
negative PromoterBinding: TP53 --21896753 10.1073/pnas.1019312108  
negative PromoterBinding: TP53 --18208354 10.1515/BC.2008.039  
negative PromoterBinding: TP53 ---| MCL1  
negative PromoterBinding: TP53 --29301217 10.3390/ijms19010107  
negative PromoterBinding: TP53 --29976747 10.3324/haematol.2018.191650  
negative PromoterBinding: TP53 --30097848 10.1007/s12035-018-1277-4  
negative PromoterBinding: TP53 --30097848 10.1007/s12035-018-1277-4  
negative PromoterBinding: TP53 --34700366 10.1515/hsz-2021-0288  
negative PromoterBinding: TP53 --35598030 10.1186/s40164-022-00283-010.1186/s40164-022-  
negative PromoterBinding: TP53 --35444234 10.1038/s41418-022-00999-w  
negative PromoterBinding: TP53 --35668109 10.1038/s41375-022-01619-9  
Regulation: PTGS2 ---> MAPK1 11891194 10.1016/S0002-9440(10)64918-8  
Regulation: PTGS2 ---> MAPK1 18549804 10.1016/j.ab.2008.05.026  
Regulation: PTGS2 ---> MAPK1 22120676 10.1016/j.bcp.2011.11.008  
Regulation: PTGS2 ---> MAPK1 21565184 10.1016/j.yexmp.2011.04.014  
Regulation: PTGS2 ---> MAPK1 17382352 10.1016/j.lfs.2007.02.008  
Regulation: PTGS2 ---> MAPK1 20470889 10.1016/j.nbd.2010.05.005  
Regulation: PTGS2 ---> MAPK1 17085321 10.1016/j.prostaglandins.2006.08.006  
Regulation: PTGS2 ---> MAPK1 10.1067/mai.2002.129705  
Regulation: PTGS2 ---> MAPK1 23810444 10.1016/j.intimp.2013.06.008  
Regulation: PTGS2 ---> MAPK1 24975097 10.1016/j.ejphar.2014.06.027  
Regulation: PTGS2 ---> MAPK1 10.1016/S1556-0864(16)30013-2  
Regulation: PTGS2 ---> MAPK1 10969080  
Regulation: PTGS2 ---> MAPK1 9291137  
Regulation: PTGS2 ---> MAPK1 16396944  
Regulation: PTGS2 ---> MAPK1 16396944  
Regulation: PTGS2 ---> MAPK1 27301644 10.1186/s12974-016-0615-6  
Regulation: PTGS2 ---> MAPK1 29156550 10.3390/ijms18112449  
Regulation: PTGS2 ---> MAPK1 22879597 10.1074/jbc.M112.385542  
Regulation: PTGS2 ---> MAPK1 20597043 10.1055/s-0030-1250074  
Regulation: PTGS2 ---> MAPK1 21737546 10.1681/ASN.2010111149  
Regulation: PTGS2 ---> MAPK1 25785965 10.1371/journal.pone.0119416  
Regulation: PTGS2 ---> MAPK1 26884798 10.1155/2016/8981650  
Regulation: PTGS2 ---> MAPK1 11891194 10.1016/S0002-9440(10)64918-8  
Regulation: PTGS2 ---> MAPK1 16396944 10.1152/ajprenal.00267.2005  
Regulation: PTGS2 ---> MAPK1 17318410 10.1007/s11010-007-9411-z  
Regulation: PTGS2 ---> MAPK1 19584262 10.1158/1541-7786.MCR-08-049310.1158/1541-778  
Regulation: PTGS2 ---> MAPK1 19671676 10.1158/1541-7786.MCR-09-000410.1158/1541-778  
Regulation: PTGS2 ---> MAPK1 19671676 10.1158/1541-7786.MCR-09-000410.1158/1541-778  
Regulation: PTGS2 ---> MAPK1 20035047 10.2353/ajpath.2010.09022210.2353/ajpath.2010  
Regulation: PTGS2 ---> MAPK1 26418808 10.1002/jb.2176910.1002/jb.21769  
Regulation: PTGS2 ---> MAPK1 27819025 10.1155/2016/9351787  
Regulation: PTGS2 ---> MAPK1 27819025 10.1155/2016/9351787  
Regulation: PTGS2 ---> MAPK1 12604350 10.1016/S0006-291X(03)00187-6  
Regulation: PTGS2 ---> MAPK1 19008312  
Regulation: PTGS2 ---> MAPK1 16624933





positive Regulation: NGF --> RAC 17561310 10.1016/j.neuint.2007.04.032  
positive Regulation: NGF --> RAC 20144672 10.1016/j.neuint.2010.01.015  
positive Regulation: NGF --> RAC 20144672 10.1016/j.neuint.2010.01.015  
positive Regulation: NGF --> RAC 20144672 10.1016/j.neuint.2010.01.015  
positive Regulation: NGF --> RAC 20307615 10.1016/j.neuint.2010.03.005  
positive Regulation: NGF --> RAC 20307615 10.1016/j.neuint.2010.03.005  
positive Regulation: NGF --> RAC 20307615 10.1016/j.neuint.2010.03.005  
positive Regulation: NGF --> RAC 17055158 10.1016/j.neulet.2006.10.008  
positive Regulation: NGF --> RAC1 10.1016/j.ijdevneu.2008.09.171  
positive Regulation: NGF --> RAC 18593598 10.1016/j.cellsig.2008.06.002  
positive Regulation: NGF --> RAC 18593598 10.1016/j.cellsig.2008.06.002  
positive Regulation: NGF --> RAC 18558478 10.1016/j.cellsig.2008.05.002  
positive Regulation: NGF --> RAC1 10.1016/j.mcn.2005.08.006  
positive Regulation: NGF --> RAC 20347391 10.1016/j.molmed.2010.02.004  
positive Regulation: NGF --> RAC 22578496 10.1016/j.neuron.2012.04.015  
positive Regulation: NGF --> RAC 23601108 10.1016/j.chom.2013.03.007  
positive Regulation: NGF --> RAC 16168664 10.1016/j.mcn.2005.08.006  
positive Regulation: NGF --> RAC 27018747 10.1016/j.bbamcr.2016.03.020  
positive Regulation: NGF --> RAC 18296444  
positive Regulation: NGF --> RAC 17535963  
positive Regulation: NGF --> RAC 16046413  
positive Regulation: NGF --> RAC 15728722  
positive Regulation: NGF --> RAC 15630019  
positive Regulation: NGF --> RAC 15289497  
positive Regulation: NGF --> RAC 15289497  
positive Regulation: NGF --> RAC 14570905  
positive Regulation: NGF --> RAC 14570905





positive Regulation: NGF --> RAC 17535963  
 positive Regulation: NGF --> RAC 20144672 10.1016/j.neuint.2010.01.015  
 positive Regulation: NGF --> RAC 20333299 10.1371/journal.pone.0009647  
 positive Regulation: NGF --> RAC 20333299 10.1371/journal.pone.0009647  
 positive Regulation: NGF --> RAC 22384148 10.1371/journal.pone.0032087  
 positive Regulation: NGF --> RAC 23223289 10.1523/JNEUROSCI.1079-12.2012  
 positive Regulation: NGF --> RAC 24732916 10.1159/000358679  
 positive Regulation: NGF --> RAC 25006578 10.1155/2014/547187  
 positive Regulation: NGF --> RAC1  
 positive Regulation: NGF --> RAC 26966186 10.1242/jcs.184168  
 positive Regulation: NGF --> RAC 26966186 10.1242/jcs.184168  
 positive Regulation: NGF --> RAC 26966186 10.1242/jcs.184168  
 positive Regulation: NGF --> RAC 29106600 10.1093/jrr/rrx03210.1093/jrr/rrx032  
 positive Regulation: NGF --> RAC 29106600 10.1093/jrr/rrx03210.1093/jrr/rrx032  
 positive Regulation: NGF --> RAC1 10.1691/ph.2018.8726  
 positive Regulation: NGF --> RAC1 10.1691/ph.2018.8726  
 negative Expression: PAX8 ---| PF 20075182  
 negative Expression: PAX8 ---| PF 16179407  
 negative Expression: PAX8 ---| PF 12364466  
 negative Expression: PAX8 ---| PF 23128507 10.3892/ijo.2012.1681  
 negative Expression: PAX8 ---| PF 32056516 10.2174/0929867327666200214125712  
 negative Expression: PAX8 ---| PF 12161538  
 negative Expression: PAX8 ---| PF 12519876  
 negative Expression: PAX8 ---| PF 16150867  
 negative Expression: PAX8 ---| PF 16179407  
 negative Expression: PAX8 ---| PF 26105190 10.1016/j.ctrv.2015.06.002  
 negative Expression: PAX8 ---| PF 24485648 10.1016/j.ctrv.2014.01.002  
 negative Expression: PAX8 ---| PF 23602255 10.1016/j.oraloncology.2013.03.437  
 negative Expression: PAX8 ---| PF 10958784  
 negative Expression: PAX8 ---| PF 16150867 10.1210/me.2005-0197  
 negative Expression: PAX8 ---| PF 24405857 10.1016/j.critrevonc.2013.12.007  
 negative Expression: PAX8 ---| PPARG  
 Regulation: IGFBP4 ---> MAPK1 28595186 10.1159/000477873  
 Regulation: IGFBP4 ---> MAPK1 28595186 10.1159/000477873  
 Regulation: IGFBP4 ---> MAPK1 10.2174/1381612828666220608122934  
 Expression: AKT1 ---> ABCC1 32531682 10.1016/j.ejmech.2020.112359  
 Expression: AKT1 ---> ABCC1 32992133 10.1016/j.ejmech.2020.112830  
 Expression: AKT1 ---> ABCC1 29800725 10.1016/j.biocel.2018.05.013  
 Expression: AKT1 ---> ABCC1 30738829 10.1016/j.ebiom.2018.12.037  
 Expression: AKT1 ---> ABCC1 22445357 10.1016/j.imlet.2012.03.005  
 Expression: AKT1 ---> ABCC1 22445357 10.1016/j.imlet.2012.03.005  
 Expression: AKT1 ---> ABCC1 22537907 10.1016/j.phymed.2012.03.008  
 Expression: AKT1 ---> ABCC1 19745159  
 Expression: AKT1 ---> ABCC1 26469962 10.1038/cddis.2015.264  
 Expression: AKT1 ---> ABCC1 32404870 10.1038/s41419-020-2573-2  
 Expression: AKT1 ---> ABCC1 32973135 10.1038/s41419-020-02998-6  
 Expression: AKT1 ---> ABCC1 32973135 10.1038/s41419-020-02998-6  
 Expression: AKT1 ---> ABCC1 33714198 10.18632/aging.202679  
 Expression: AKT1 ---> ABCC1 33813658 10.1007/s10555-021-09959-1  
 Expression: AKT1 ---> ABCC1 23392708 10.1007/s11596-013-1071-5  
 Expression: AKT1 ---> ABCC1 23392708 10.1007/s11596-013-1071-5  
 Expression: AKT1 ---> ABCC1 20711237 10.1038/onc.2010.303  
 Expression: AKT1 ---> ABCC1 25760096 10.3892/mmr.2015.3468  
 Expression: AKT1 ---> ABCC1 26063481 10.3892/or.2015.4047

Expression: AKT1 ---> ABCC1 17215852 10.1038/sj.leu.2404523  
 Expression: AKT1 ---> ABCC1 17215852 10.1038/sj.leu.2404523  
 Expression: AKT1 ---> ABCC1 22082269 10.1134/S000629791109004510.1134/S00062979110  
 Expression: AKT1 ---> ABCC1 23940624 10.1371/journal.pone.007068510.1371/journal.p  
 Expression: AKT1 ---> ABCC1 34535128 10.1186/s12935-021-02209-y  
 Expression: AKT1 ---> ABCC1 10.1016/j.ebiom.2018.12.037  
 Expression: AKT1 ---> ABCC1 10.1016/j.phymed.2012.03.008  
 Expression: AKT1 ---> ABCC1 23940624 10.1371/journal.pone.0070685  
 Expression: AKT1 ---> ABCC1 23940624 10.1371/journal.pone.0070685  
 Expression: AKT1 ---> ABCC1 23940624 10.1371/journal.pone.0070685  
 Expression: AKT1 ---> ABCC1 23051672 10.1016/j.ejphar.2012.09.046  
 Expression: AKT1 ---> ABCC1 15784621  
 Expression: AKT1 ---> ABCC1 26722004 10.1096/fj.15-283408  
 Expression: AKT1 ---> ABCC1  
 Expression: AKT1 ---> ABCC1 33231085 10.4149/neo\_2020\_200605N604  
 negative Regulation: RAI2 ---| AF 32177171 10.1093/annonc/mdy151.188  
 negative Regulation: RAI2 ---| AF 32177171 10.1093/annonc/mdy151.188  
 negative Regulation: RAI2 ---| AF 32177171 10.1093/annonc/mdy151.188  
 negative Regulation: RAI2 ---| AF 33782811 10.1007/s10549-021-06176-w  
 negative Regulation: RAI2 ---| AF 29796120 10.1186/s13148-018-0501-410.1186/s13148-018-0  
 Expression: GPER1 ---> PPARG 35740412 10.3390/biomedicines1006139010.3390/biomedici  
 Expression: GPER1 ---> PPARG 35256537 10.1530/JOE-21-0398  
 Regulation: NGF ---> PTEN 20610402 10.1074/jbc.M110.147546  
 Regulation: NGF ---> PTEN 22465479 10.1016/j.yexcr.2012.03.006  
 Regulation: NGF ---> PTEN 20869442 10.1016/j.mcn.2010.09.006  
 Regulation: NGF ---> PTEN 23500101 10.1016/j.neuroscience.2013.02.059  
 Regulation: NGF ---> PTEN 16723502  
 Regulation: NGF ---> PTEN 20237279  
 Regulation: NGF ---> PTEN 28264976 10.1523/JNEUROSCI.2923-16.2017  
 Regulation: NGF ---> PTEN 28264976 10.1523/JNEUROSCI.2923-16.2017  
 Regulation: NGF ---> PTEN 22027198 10.1074/mcp.M111.013375  
 Regulation: NGF ---> PTEN 22918949 10.1091/mbc.E12-05-0367  
 Regulation: NGF ---> PTEN 22918949 10.1091/mbc.E12-05-0367  
 Regulation: NGF ---> PTEN 20610402 10.1074/jbc.M110.147546  
 Regulation: NGF ---> PTEN 16723502 10.1091/mbc.e05-12-1144  
 Regulation: NGF ---> PTEN 10.1016/j.yexcr.2012.03.006  
 Regulation: NGF ---> PTEN 10.1523/JNEUROSCI.2923-16.2017  
 Regulation: NGF ---> PTEN 10.1523/JNEUROSCI.2923-16.2017  
 Regulation: NGF ---> PTEN 20610402 10.1074/jbc.M110.147546  
 Regulation: NGF ---> PTEN 19070673 10.1016/j.cellbi.2008.11.010  
 Regulation: NGF ---> PTEN  
 Regulation: SFRP1 ---> NOTCH1 18984672  
 Regulation: SFRP1 ---> NOTCH1 21478884 10.1038/nm.2794  
 Regulation: SFRP1 ---> NOTCH1 25616895 10.1242/jcs.163063  
 Regulation: SFRP1 ---> NOTCH1 21896628 10.1242/dev.065839  
 Regulation: SFRP1 ---> NOTCH1 27985737

Regulation: SFRP1 ---> NOTCH1

positive Expression: MIR107 --> 33651959 10.1089/dna.2020.6356

positive Expression: MIR107 --> 33651959 10.1089/dna.2020.6356

positive Expression: MIR107 --> 28276320 10.3727/096504017X1488282907723710.3727/09650

positive Expression: MIR107 --> 28063928 10.1016/j.bbrc.2017.01.01310.1016/j.bbrc.2017

positive Expression: MIR107 --> 28276320 10.3727/096504017X14882829077237

positive Expression: MIR107 --> 28276320 10.3727/096504017X14882829077237

positive Expression: MIR107 --> 28276320 10.3727/096504017X14882829077237

positive Regulation: NOTCH1 --> 26302803 10.2174/1389450116666150825113035

positive Regulation: NOTCH1 --> 29160307 10.1038/nature24998

positive Regulation: NOTCH1 --> 23688168 10.1186/1471-2407-13-244

positive Regulation: NOTCH1 --> 34425253 10.1016/j.cdev.2021.203735

positive Regulation: NOTCH1 --> RAC1 10.2174/1389450116666150825113035

positive Regulation: NOTCH1 --> 28268126 10.1016/j.mcn.2017.03.001

positive Regulation: NOTCH1 --> 29058721 10.1038/ncb3628

positive Regulation: NOTCH1 --> 36241874 10.1038/s41423-022-00930-w

positive Regulation: NOTCH1 --> 36241874 10.1038/s41423-022-00930-w

negative Regulation: TP53 ---| CI 12034755

Expression: BECN1 ---> TP53 10.1016/j.semcancer.2019.07.013

Expression: BECN1 ---> TP53 24858802 10.1016/j.bcp.2014.05.009

Expression: BECN1 ---> TP53 24858802 10.1016/j.bcp.2014.05.009

Expression: BECN1 ---> TP53 27559856 10.1080/15548627.2016.1217380

Expression: BECN1 ---> TP53 29230017 10.1038/s41556-017-0007-x

Expression: BECN1 ---> TP53 29991800 10.1038/s41388-018-0395-9

Expression: BECN1 ---> TP53 10.1530/REP-18-0243

Expression: BECN1 ---> TP53 10.1007/978-981-15-0602-4\_1

Expression: BECN1 ---> TP53 23486312 10.4161/auto.24132

Expression: BECN1 ---> TP53 23542691 10.1038/nn.3365

Expression: BECN1 ---> TP53 24256242 10.1042/BST20130185

Expression: BECN1 ---> TP53 25180518 10.4161/auto.34398

Expression: BECN1 ---> TP53 26530936 10.3892/i.jo.2015.3227

Expression: BECN1 ---> TP53 21962518 10.1016/j.cell.2011.08.03710.1016/j.cell.2011

Expression: BECN1 ---> TP53 30539860 10.4103/0973-1482.20489810.4103/0973-1482.204

Expression: BECN1 ---> TP53 24833845 10.3748/wjg.v20.i17.4953

Expression: BECN1 ---> TP53 23466706 10.4161/cc.24128

Expression: BECN1 ---> TP53 22481206

Expression: BECN1 ---> TP53 10.1530/ERC-16-0359

Expression: BECN1 ---> TP53 34678225 10.1016/j.bcp.2021.114797

negative Expression: PPP1R3C ---| 12727934

Expression: SPP1 ---> PTEN 27063991 10.1016/j.lfs.2016.04.00310.1016/j.lfs.2016.0

Expression: SPP1 ---> PTEN 28875010

Expression: SPP1 ---> PTEN 24039584 10.1371/journal.ppat.1003623

Expression: SPP1 ---> PTEN 19683677 10.1016/j.chom.2009.07.008

|                            |          |                              |
|----------------------------|----------|------------------------------|
| Expression: SPP1 ---> PTEN | 19286136 | 10.1016/j.chom.2009.01.005   |
| Expression: SPP1 ---> PTEN | 28928218 | 10.1074/jbc.M117.797787      |
| Expression: SPP1 ---> PTEN | 28928218 | 10.1074/jbc.M117.797787      |
| Expression: PTEN ---> SPP1 | 33130075 | 10.1016/j.lfs.2020.118680    |
| Expression: PTEN ---> SPP1 | 19549529 | 10.1053/j.gastro.2009.06.039 |
| Expression: PTEN ---> SPP1 | 28505114 | 10.3390/ijms18051058         |
| Expression: PTEN ---> SPP1 | 24893171 | 10.1371/journal.pone.0097544 |
| Expression: PTEN ---> SPP1 | 15705860 |                              |
| Expression: PTEN ---> SPP1 | 15705860 |                              |
| Expression: PTEN ---> SPP1 | 12460992 | 10.1074/jbc.M209299200       |
| Expression: PTEN ---> SPP1 | 10970827 | 10.1165/ajrcmb.23.3.4002     |
| Expression: PTEN ---> SPP1 | 24379438 | 10.1128/MCB.01384-13         |
| Expression: PTEN ---> SPP1 | 12460992 |                              |
| Expression: PTEN ---> SPP1 | 34240392 | 10.1007/s13577-021-00571-7   |





0.04.002  
SCI.4024-13.2014  
freeradbiomed.2014.12.019

09.004





. 2020. 1749790  
019. 05. 015  
08-01-132068  
3. 021  
01(11)60032-8

00000000961



.g. 2018. 01. 004

.010-3

1. 03. 152

.150-7

2014. 06. 020





.1  
2014. 01. 028  
93484-2

one. 0065751  
01. 004





027-3

027-3

2-4934. 2009. 00709. x

2-4934. 2009. 00709. x

5

2-4934. 2012. 01602. x

0-0277. 2008. 00781. x

0-0277. 2008. 00781. x

2019. 01. 001

2020. 129836







i53733

2016. 08. 015



13113  
13113

·05239-3

neuroscience.2021.04.010  
00571-x

017.11.009

l. 06. 004



enta. 2008. 10. 001



2. CCR-15-0016  
421-2  
2. CAN-14-3362  
2. CAN-14-3362  
17. 02. 006  
986-y

i\_18  
1. 104806  
1. 104806

·04293-4

.nes10020236



21914  
:7  
·01372-y

i2

one.0085116





2010. 10. 007

:8









.g. 2018. 03. 013



0241

one. 0111860  
one. 0111860

:

.3







. 2020. 1749790  
. 2020. 1749790  
. 2020. 1749790

-129  
;3

freeradbiomed. 2014. 02. 023  
one. 0106812





0.12.002

0.03.014

4

14008  
14008  
8-19. 2020

02147-z10. 1038/s41580-019-0199-y10. 1016/j. cell. 2017. 04. 00110. 1038/nrm. 2017. 9510. 1  
02147-z10. 1038/s41580-019-0199-y10. 1016/j. cell. 2017. 04. 00110. 1038/nrm. 2017. 9510. 1  
02147-z10. 1038/s41580-019-0199-y10. 1016/j. cell. 2017. 04. 00110. 1038/nrm. 2017. 9510. 1



01812\_16625

017.10.033





·89220-5  
·89220-5



2.011

017.08.028

7

24770  
0152  
403-9  
403-9  
15  
03556-4

4

03047-2

2010. 02. 001

1599-5

100000000804

ies9020207

088-x

i5

9-7006. 2008. 00904. x

913-1

:913-1  
:913-1  
:913-1

9-7006. 2009. 01302. x  
9-7006. 2009. 01302. x  
9-7006. 2009. 01302. x  
9-7006. 2009. 01302. x

2. CCR-15-0016  
2  
919-y  
627

3. MCT-20-1112  
3. MCT-20-1112

2021. 119144



. 03. 010  
87305

29788

02550-w10. 1038/s41575-020-0310-z10. 1053/j. gastro. 2016. 11. 04810. 1038/nrclinonc. 201  
01972-0

21914  
2018.03.002  
2018.03.002  
n.2018.e01039  
01372-y  
bio.3001199

418-y

418-y





·03185-3

08.010

.g. 2013. 02. 018

one.0071453

i1

i1

i1









2.011





0704

07.021

2. 2021. 1906500

19033

19033

2. CAN-13-3076

0847-9  
02. CCR-08-0629  
18518

02. CAN-13-3590  
021. 112631  
02020. 1761748  
0247-x

-149







00348-510. 3322/caac. 2149210. 1056/NEJMr171571510. 1111/j. 1600-0714. 2007. 00582. x10.

HA. 107. 164749

!5

!5

.04308

.4

.4

1873



i. issn. 1009-2137. 2015. 03. 015



0625-9  
10.03.015  
one.0019139

one.0077922  
one.0102118

01905\_17948

00504-4



01809\_15810  
cnki. cjcmm. 20180601. 001  
l. 04. 034

107695



;/2046-3758. 108. BJR-2020-0127. R2

. 05. 023  
082-0

.6

res. 2010. 11. 062

15

13. 020

1373-x

g. 2014. 06. 007

'959





13113  
13113

neuroscience.2021.04.010

00571-x

. 2016. 4

.150-7

2021. 107675

2021. 107675

issn. 1009-3419. 2014. 02. 13  
12984

i290  
i290



01.004

one.0065751

172

pat.1007100

0106N18



257-9

6. MCR-14-0177





09.06.024

0276-1

2

1

0675-2

0

2014.01.028

choralbio.2014.07.013

070

3.11.070





l. 08. 025

m. 2008. 09. 003

·choralbio. 2009. 12. 003

00000000192

0226-x



н. 2009. 03. 015  
3. МСТ-09-0148

16. 05. 003

i. 06. 057

15

01718-z10. 1016/j. critrevonc. 2020. 10298810. 1016/S0925-5710(98)00038-310. 3109/07388

0913-4

freeradbiomed. 2015. 08. 011

'2. CAN-20-0505

opat. 1007100

1040-z







. 4449

49021-3



;-4934.2008.00311.x

;-0538









0

.g. 2012. 05. 011

.4

0981

.y. 2015. 35



-15170-6  
g. 2018. 01. 004

0981

1-8612-5\_9  
1-8612-5\_9

1. 2021. 1906500  
07. 021

2019. 172658

one. 0095136  
4. 019

l/j. issn. 1671-5411. 2018. 07. 001















010-0  
2013. 10. 001  
069-4  
972-x  
2019. 109306

19281

19281

pat. 1007100

biomaterials.2014.08.016

000001806

i3  
i606

0248-0

0759-5

033231

orgbio.2019.110989  
85523

8.010

.08.037  
898



one. 0066275

l. 090222

17

17

.647-3

one. 0106812



1. 16

2018. 05. 020

13







1289-6

0.026

g. 2018.03.013

16. MCR-21-0149









1027-3

1027-3

2015. 11. 006

2016. 12. 006

2020. 110769

2. CCR-18-0867



one. 0071453

i1

i1

i1

12984



5729. 2019. 036

·02951-7

freeradbiomed.2021.06.025

85.2009

02.006

013.07.011

.3

2.007  
17.016  
2019.172667

'5  
'5

2018. 08. 102











.211

.5

6e3282f343e1

.8

649-y

6.11.045



027-3  
027-3  
2015. 11. 006  
2016. 12. 006  
2020. 110769

090803

ie318297d741

i805





021.106001  
1.05.017  
one.0018823  
'9  
'9

.539-9  
.539-9



.51. 2009  
090. 2012

01  
01







1895-9

g. 2017. 06. 012  
otobiol. 2017. 10. 006  
0067X

06.008

10.1615/JEnvironPatholToxicolOncol.2018026684

01

01

2019.172586

0822

6. MCR-20-0173  
one. 0064771

3e31827912b8  
03.018  
013.07.011  
0ids.2016.01.021  
2.007

2018.01.040  
2018.08.102

06.MCR-20-0173  
2022.113290

i.2022.36.S1.R5122





01. 2020. 08. 007  
03. MCT-12-0342

361-2

361-2

2. CAN-12-2220

20. 101774

20. 101774

. 2020. 1838032

one. 0126176  
4016X14666990347437

:761-3

-01826-5

!. 05. 009

13355  
13355



'2. CAN-19-0950  
·04958-8



neuroscience.2012.01.002



206-5

418-y

418-y

3. MCT-10-0336  
. 2018. 1553607  
3. 12. 005  
00000003576

000-6

one. 0122179

.g. 2011. 09. 015

iber. 18. 18



ic. 2011. 07. 006  
04. 017

02. 187

02. 187





one. 0065821  
one. 0065821

n. 2016. 03. 001  
l. 08. 037  
019  
019  
019







:7

01372-y

one. 0004911  
434-7  
one. 0212749  
. 2020. 1711578

i3

.g. 2013. 02. 018

i2-0436. 2007. 00261. x

one. 0100515

17. 10. 033

2019. 03. 005

18-19. 2020



14008  
14008

. 2020. 1749790  
. 2020. 1749790  
. 2020. 1749790

·00275-3





one. 0106812





.00348-510.3322/caac.2149210.1056/NEJMr171571510.1111/j.1600-0714.2007.00582.x10.

.04308

.4  
.4  
.150-7  
12768

1697-7  
1697-7  
1697-7

03105-8

1. 2022. 2051266

18  
:069-4  
:069-4  
.625-y

018.03.014

1.01.060



1617-y  
2012. 11. 047  
17

1635-6  
1635-6



'8

1759-5

'476

res. 2010. 11. 062  
02. 005

one. 0019139  
2016. 04. 015

17  
2012. 11. 047  
0617-y

2015. 1029836



·01072-510. 1016/j. ygyno. 2018. 05. 01510. 1016/j. bulcan. 2017. 10. 00610. 2174/13894501179

·08671-110.1046/j.1471-4159.2003.01562.x10.1038/sj.onc.120696510.1016/j.neuroscien  
·02873-4

i3





ICI. 0936-16. 2016

'2. CAN-08-0579  
'2. CAN-08-0579  
'2. CAN-16-3470



00164

2015. 05. 014

2. CCR-17-1574

2. CCR-17-1574

-196

i1

854

18

17.08.028



1.02.187  
1.02.187



one. 0096466

19

3. MCT-07-2183

1. 03. 024

2. CAN-10-4531

1. 09. 008



22926

1. 09. 008

1. 09. 008

1. 115013

120. 112343

217-9

l. 06. 160  
l. 06. 160

·00756-8



2009. 09. 003  
2011. 11. 004

.. 12. 063  
'213  
2016. 06. 027  
00000002440

00000002440





2011. 06. 008

2017. 06. 089

.119-x

00519-x10. 3322/caac. 2133810. 1007/s11748-013-0246-010. 1016/j. athoracsur. 2018. 02. 01

12  
2013. 06. 009  
25349

105840  
105840

·03047-2

freeradbiomed. 2015. 08. 011

RTENSIONAHA. 114. 03884  
i. prostaglandins. 2012. 09. 004

'2. CAN-11-2291

2019. 02. 036

4014X14024160459087

04207

1030-x

12. CAN-09-2316

1609-0

HA. 112. 280399

neuro1. 2014. 05. 014



26473-7



























one. 0143663

12648-1

1805-8

08903  
08903

13. 056



6. MCR-08-0493

6. MCR-08-0493

6. MCR-08-0493

6. MCR-08-0493

6. MCR-09-0004

6. MCR-09-0004

090222

2011. 07. 011

2015. 09. 018

452

452

318-6

-00283-010. 1002/jcb. 2008010. 1016/j. arcmed. 2020. 02. 00510. 1016/j. beha. 2019. 05. 00810.

6. MCR-08-0493

6. MCR-08-0493

6. MCR-08-0493

6. MCR-08-0493

6. MCR-09-0004

6. MCR-09-0004

1. 090222













190045  
one.0070685

1501-4  
nes10061390

4017X14882829077237  
.01.013

.08.037  
.898

4.003









































































































038/sj. onc. 120566210. 1073/pnas. 050285710210. 1016/j. cell. 2008. 06. 02810. 1016/j. molc  
038/sj. onc. 120566210. 1073/pnas. 050285710210. 1016/j. cell. 2008. 06. 02810. 1016/j. molc  
038/sj. onc. 120566210. 1073/pnas. 050285710210. 1016/j. cell. 2008. 06. 02810. 1016/j. molc

























7. 15710. 1016/j. jhep. 2020. 11. 03710. 1038/s41572-021-00300-210. 1016/j.annonc. 2021. 04



































3322/caac.2138810.1016/S0140-6736(08)60728-X10.4065/83.4.48910.1038/sj.bjc.660251































































551. 2015. 101595710. 1038/nature0592510. 1080/15548627. 2016. 116435910. 21037/atm. 2019























































































































































































































3322/caac.2138810.1016/S0140-6736(08)60728-X10.4065/83.4.48910.1038/sj.bjc.660251





















1590653410.1186/s12885-018-5074-210.1016/j.ygyno.2014.05.01810.3892/ijo.2017.40931

ice. 2008. 07. 00110. 1371/journal. pone. 010537210. 1196/annals. 1332. 00810. 1111/j. 1476-5





































810.21037/cco.2017.07.0210.1016/j.oraloncology.2008.06.00210.1016/j.tox.2006.07.0















































1038/cdd.2017.18610.1016/j.cce11.2019.09.00810.1042/BCJ2017008010.1097/PP0.000000

























































































































.e1. 2010. 09. 02610. 1016/S1097-2765(01)00323-910. 1  
.e1. 2010. 09. 02610. 1016/S1097-2765(01)00323-910. 1  
.e1. 2010. 09. 02610. 1016/S1097-2765(01)00323-910. 1

























. 01210. 1158/2159-8290. CD-20-087310. 1038/s41591-



































010.1200/JC0.2015.61.292910.1126/science.120692































































doi:10.1371/journal.pone.0090151.g002























































































































































































































010.1200/JC0.2015.61.292910.1126/science.120692





















0. 1182/blood-2007-05-08868210. 1023/A:1010921313

1381.2009.00022.x10.1371/journal.pone.002189110.





































1110.1016/j.toxlet.2013.10.00410.1289/ehp.09010















































000000040810.1080/10428194.2017.128303210.3390/
